# Supplementary material for: Small-quantity lipid-based nutrient supplements for children age 6-24 months: a systematic review and individual participant data meta-analysis of effects on developmental outcomes and effect modifiers
Source: bioRxiv or medRxiv preprint supplement (doi:10.1101/2021.02.15.21251423), 2021-02-18

Supplemental Figure 1: Summary risk of bias as a percentage of all included studies for the effects of SQ-LNS on developmental outcomes

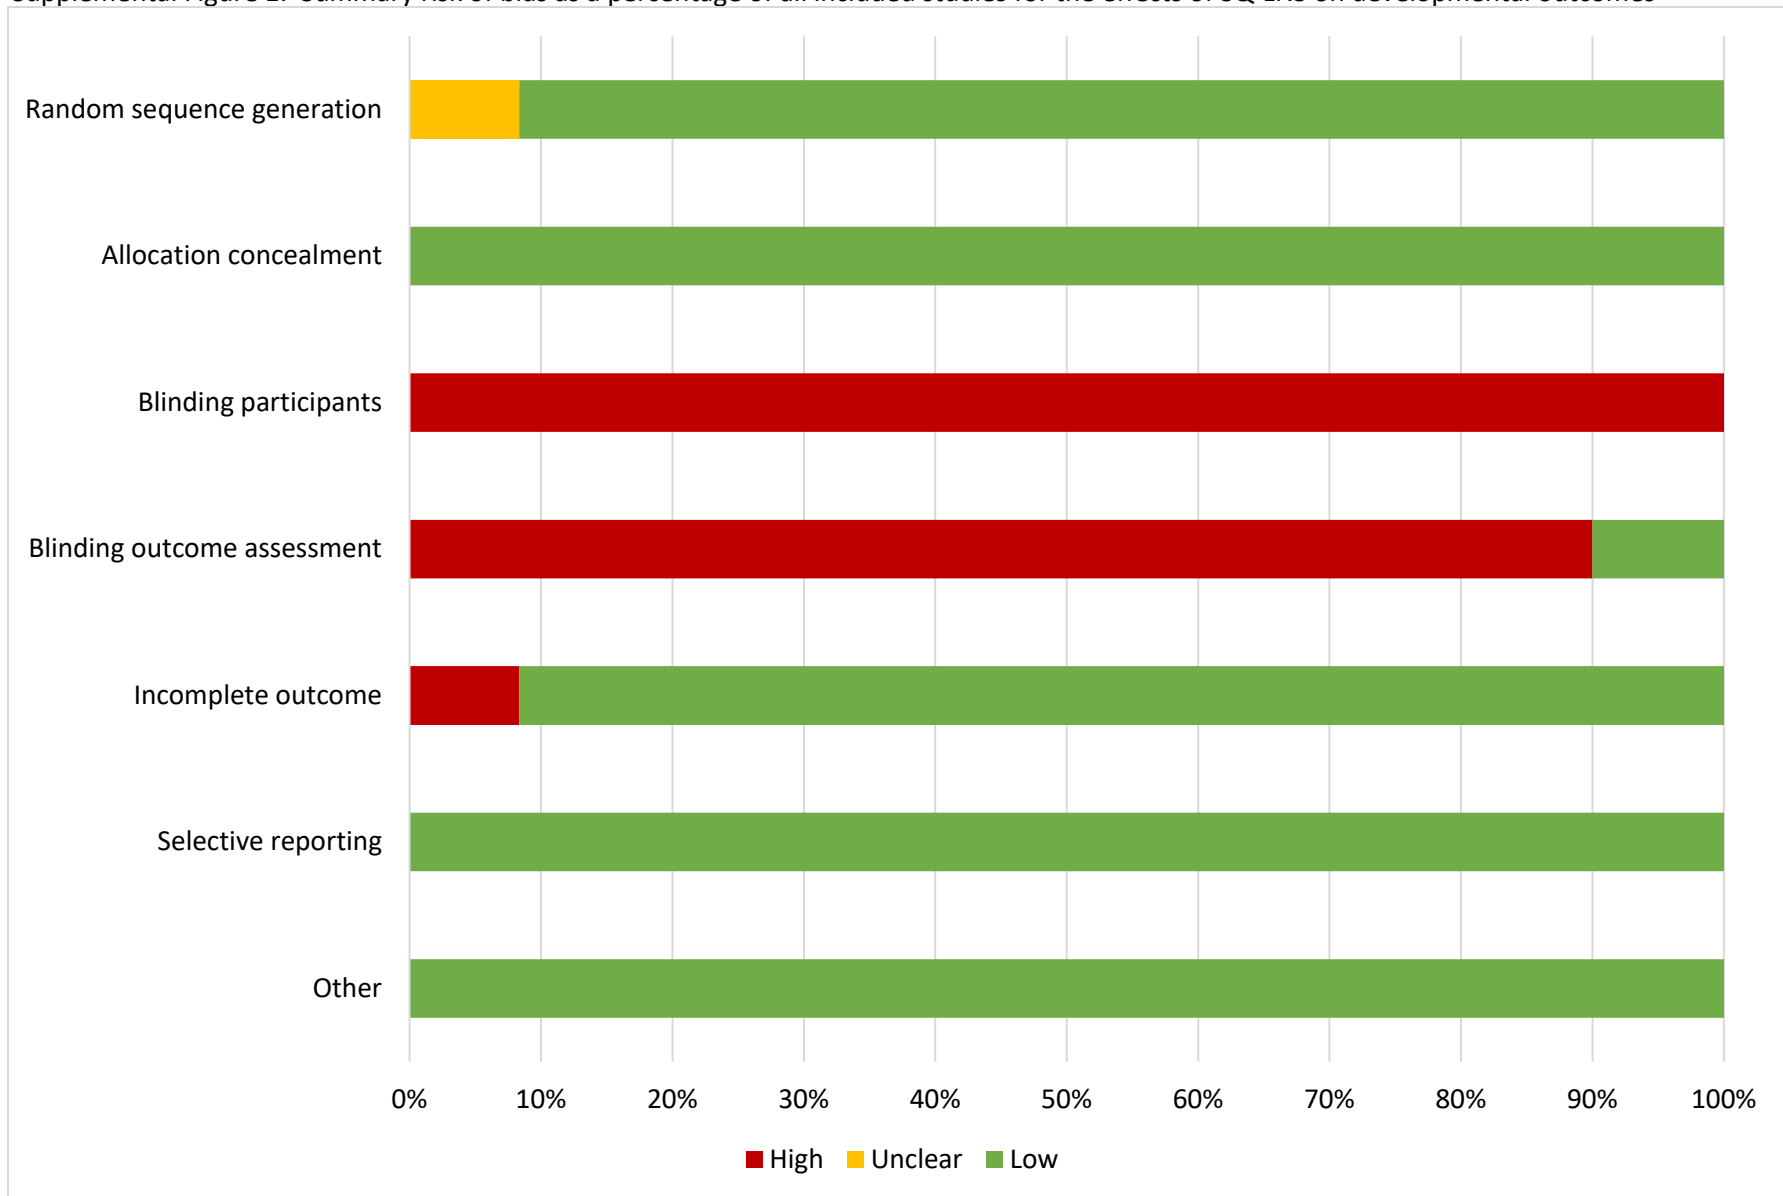

## Supplemental figure 2: Sensitivity analyses of main effects of SQ-LNS on developmental outcomes

### Contents

|                                                                             |   |
|-----------------------------------------------------------------------------|---|
| Supplemental figure 2A: Mean differences for continuous outcomes            | 2 |
| Supplemental figure 2B: Prevalence ratios for dichotomous outcomes          | 3 |
| Supplemental figure 2C: Prevalence differences for dichotomous outcomes     | 4 |
| Supplemental figure 2D: Prevalence ratios for 12 mo milestone outcomes      | 5 |
| Supplemental figure 2E: Prevalence differences for 12 mo milestone outcomes | 6 |
| Supplemental figure 2F: Prevalence ratios for 18 mo milestone outcomes      | 7 |
| Supplemental figure 2G: Prevalence differences for 18 mo milestone outcomes | 8 |

These figures show the pooled estimates of intervention effects by different pooling methods and different sensitivity analyses. For continuous outcomes, the intervention effect is measured by the difference in mean of the LNS group minus control. For dichotomous outcomes analyzed via prevalence ratios, the effect estimate is the prevalence in the LNS group divided by the prevalence in the control group. For dichotomous outcomes analyzed via prevalence differences, the effect estimate is the prevalence in the LNS group minus the prevalence in the control group. The labels on the left y-axis indicate which outcome is assessed. The different columns correspond to sensitivity analyses in which intervention group categorization differs. All-trial analysis includes all trials; Child-LNS-only excludes trial arms that provided both maternal and child LNS; Multi-component analysis separates comparisons within trials that included multi-component interventions, so that the SQ-LNS vs. no SQ-LNS comparisons were conducted separately between pairs of arms that included the same non-nutrition components (e.g. SQ-LNS+WASH vs. WASH; SQ-LNS vs. Control); Passive arms excluded analysis excludes passive control arms.

### Supplemental figure 2A: Mean differences for continuous outcomes

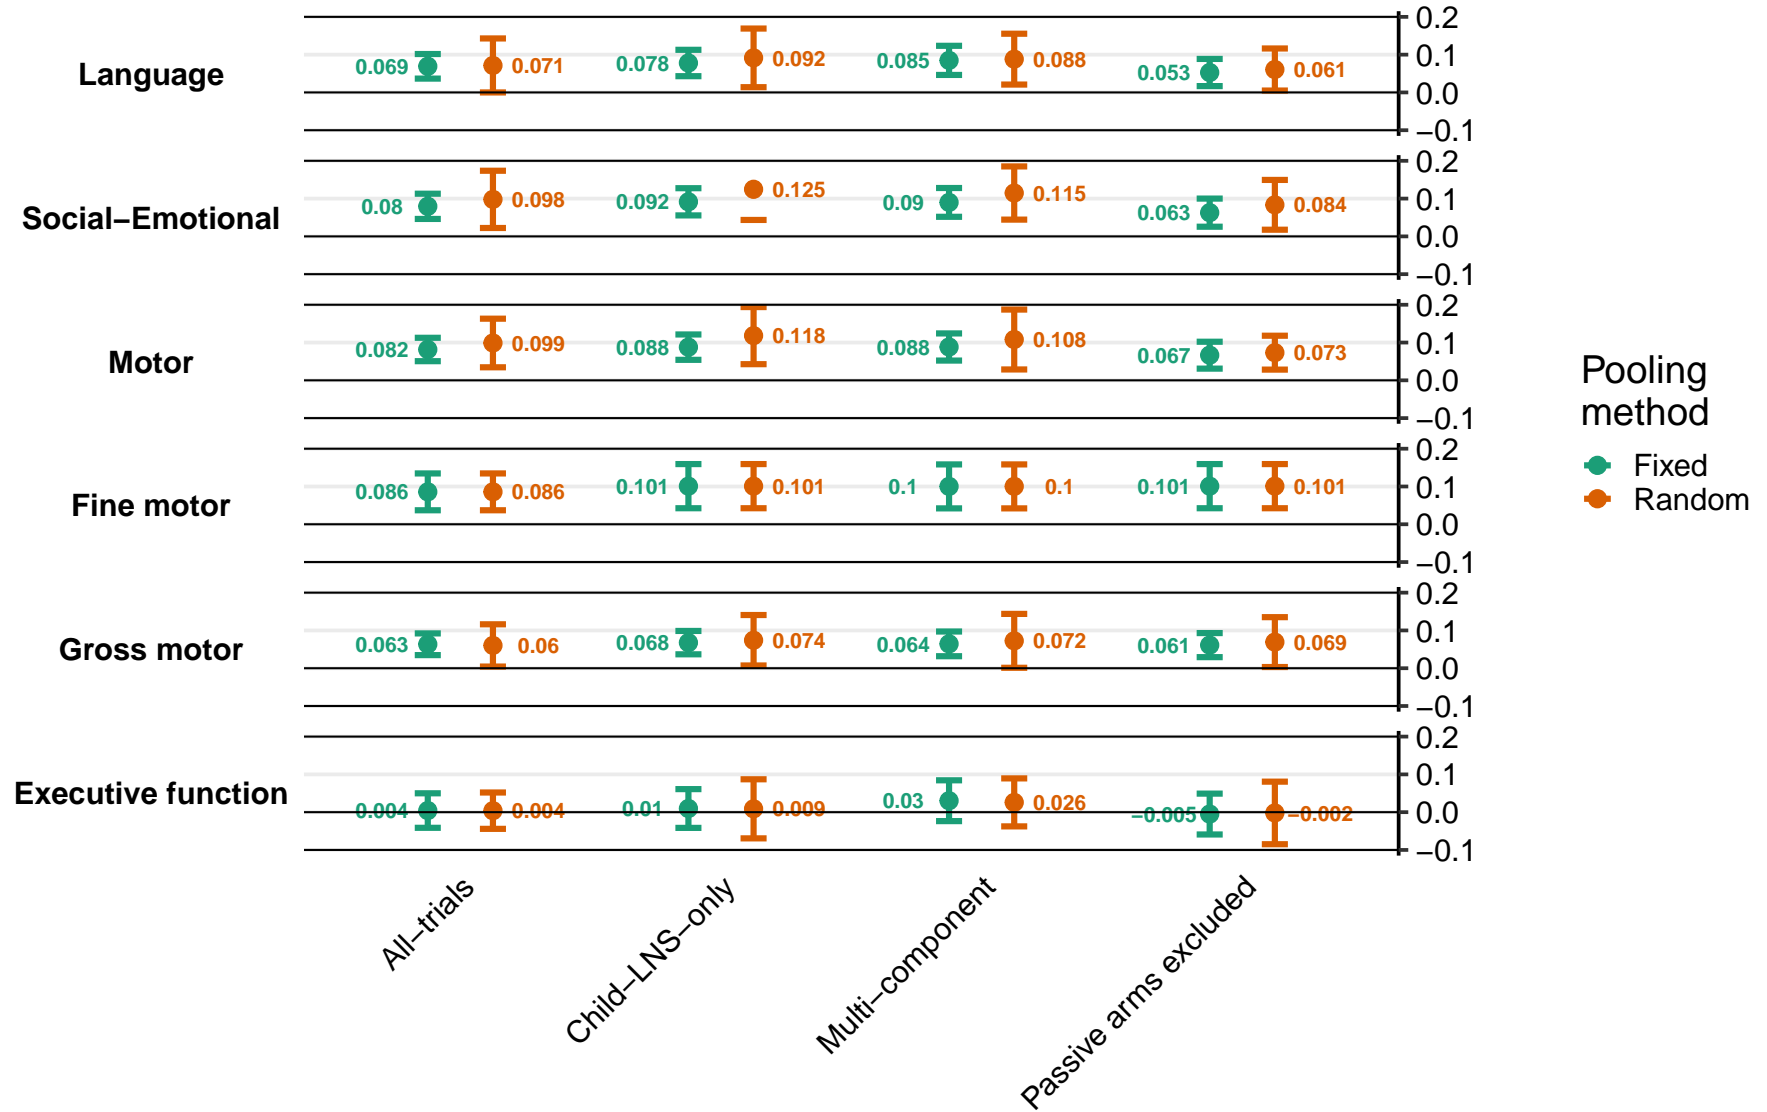

### Supplemental figure 2B: Prevalence ratios for dichotomous outcomes

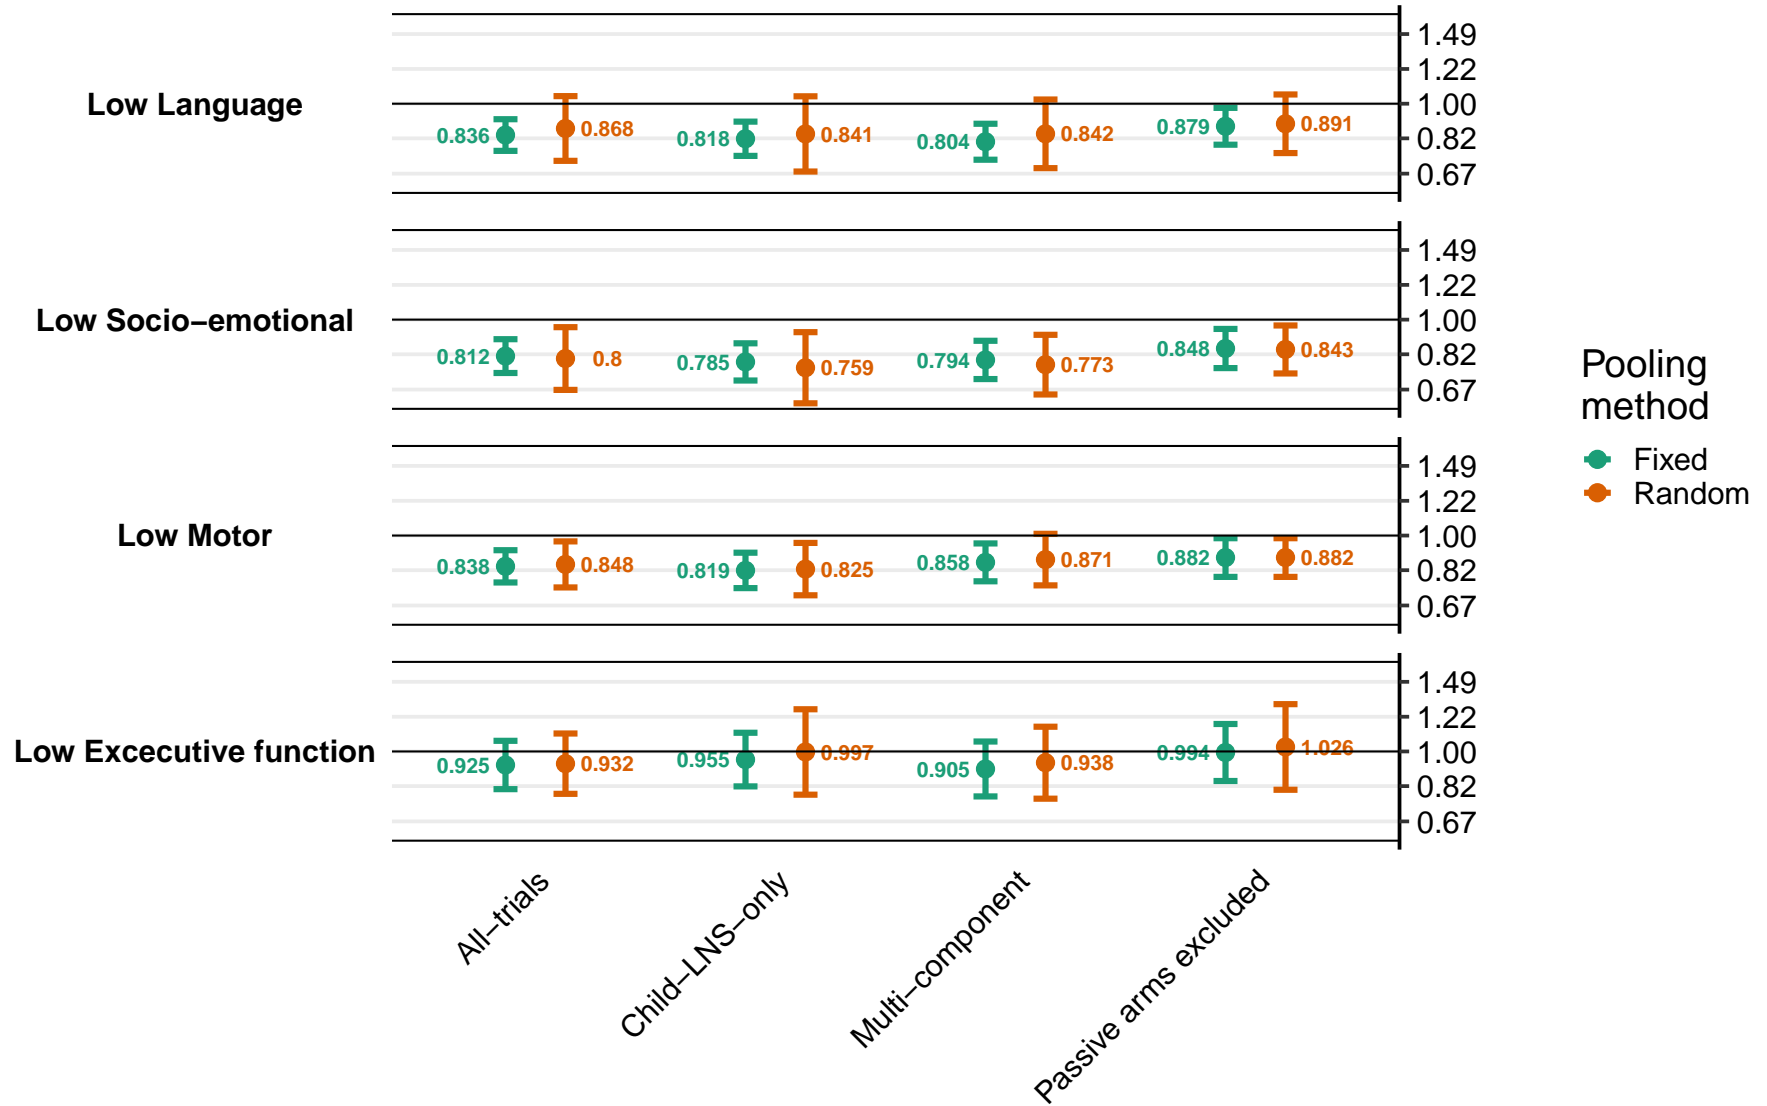

Supplemental figure 2C: Prevalence differences for dichotomous outcomes

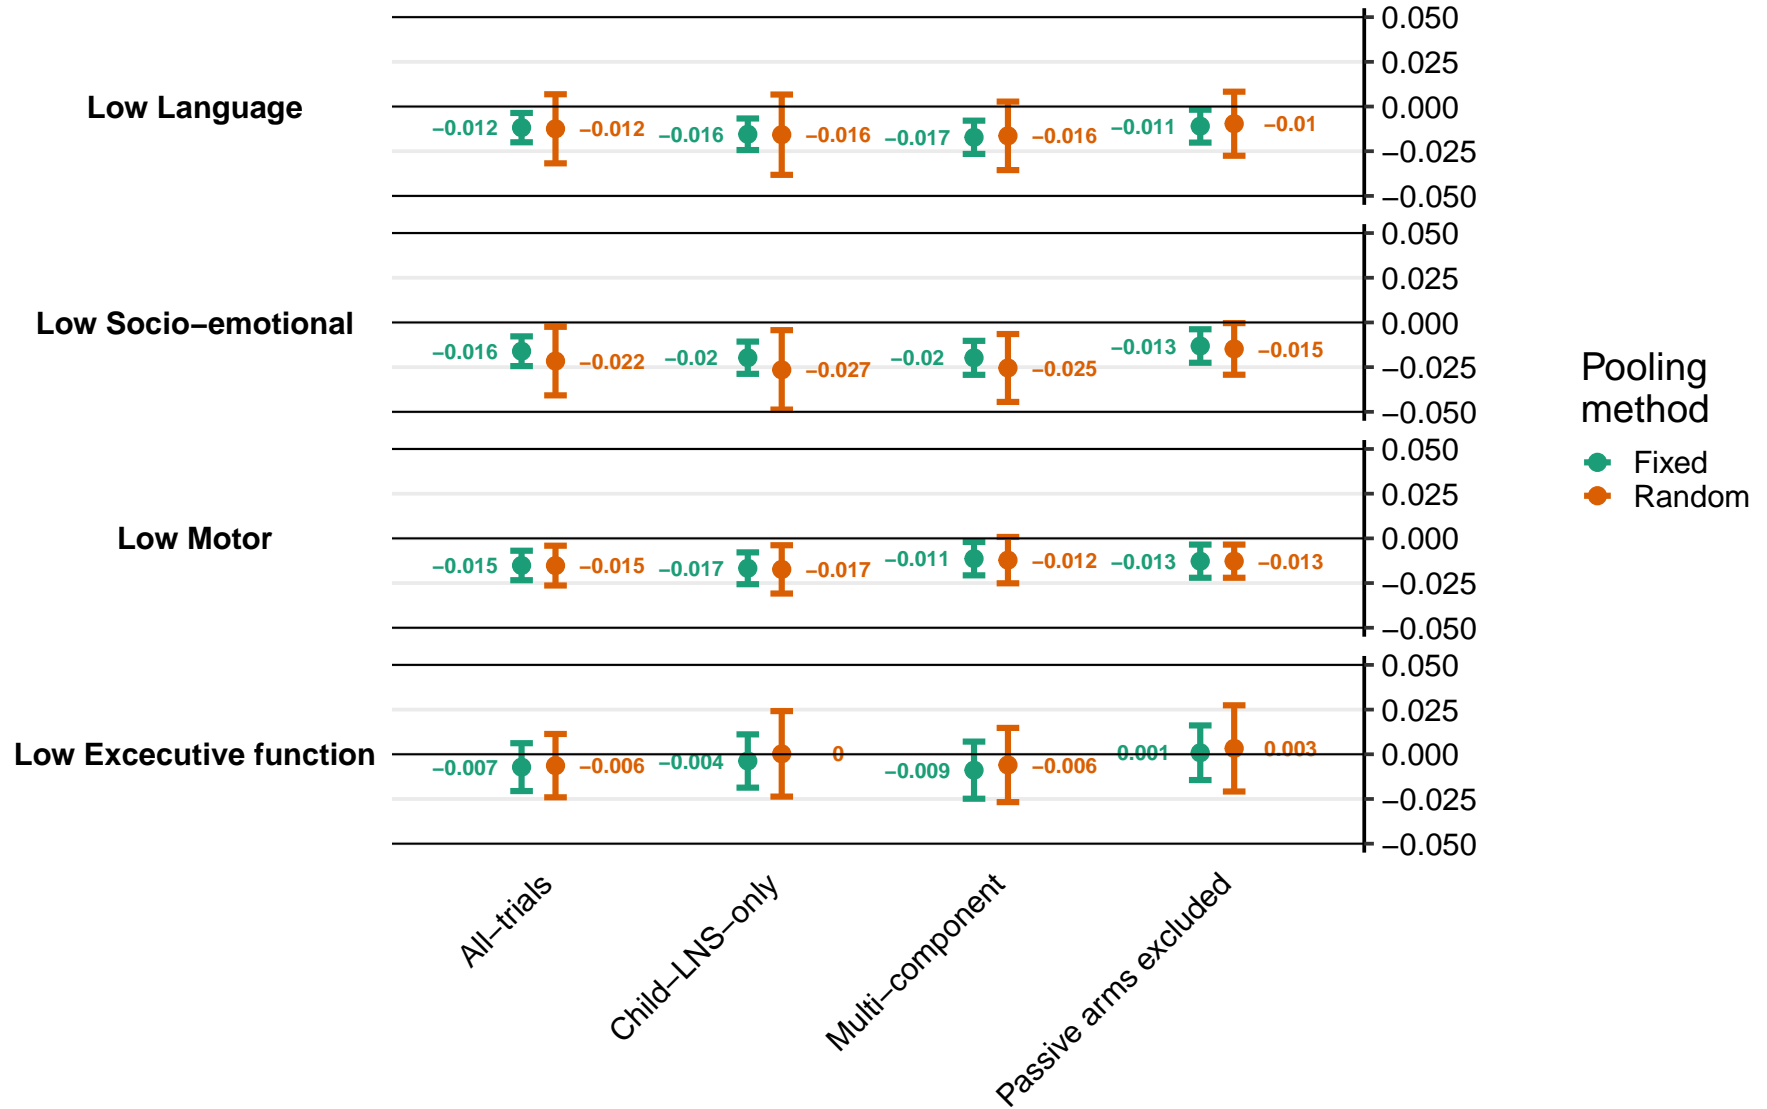

### Supplemental figure 2D: Prevalence ratios for 12 mo milestone outcomes

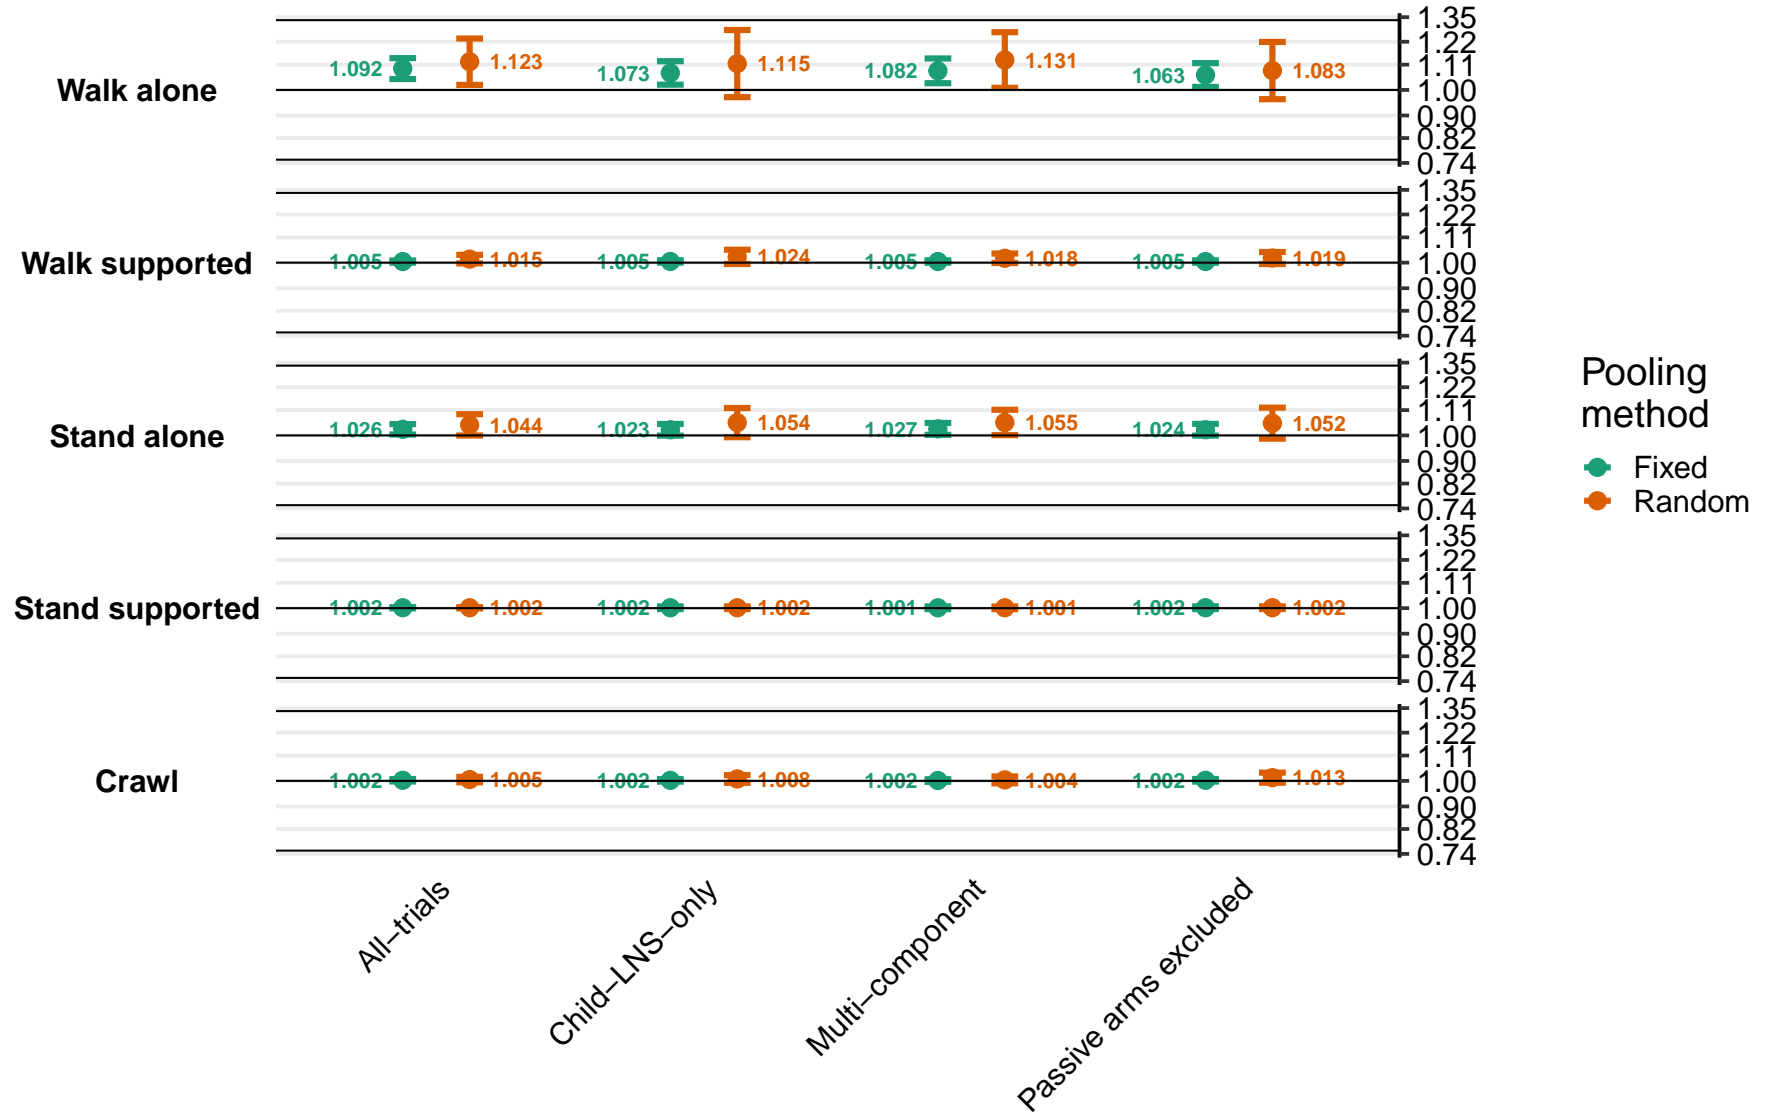

Supplemental figure 2E: Prevalence differences for 12 mo milestone outcomes

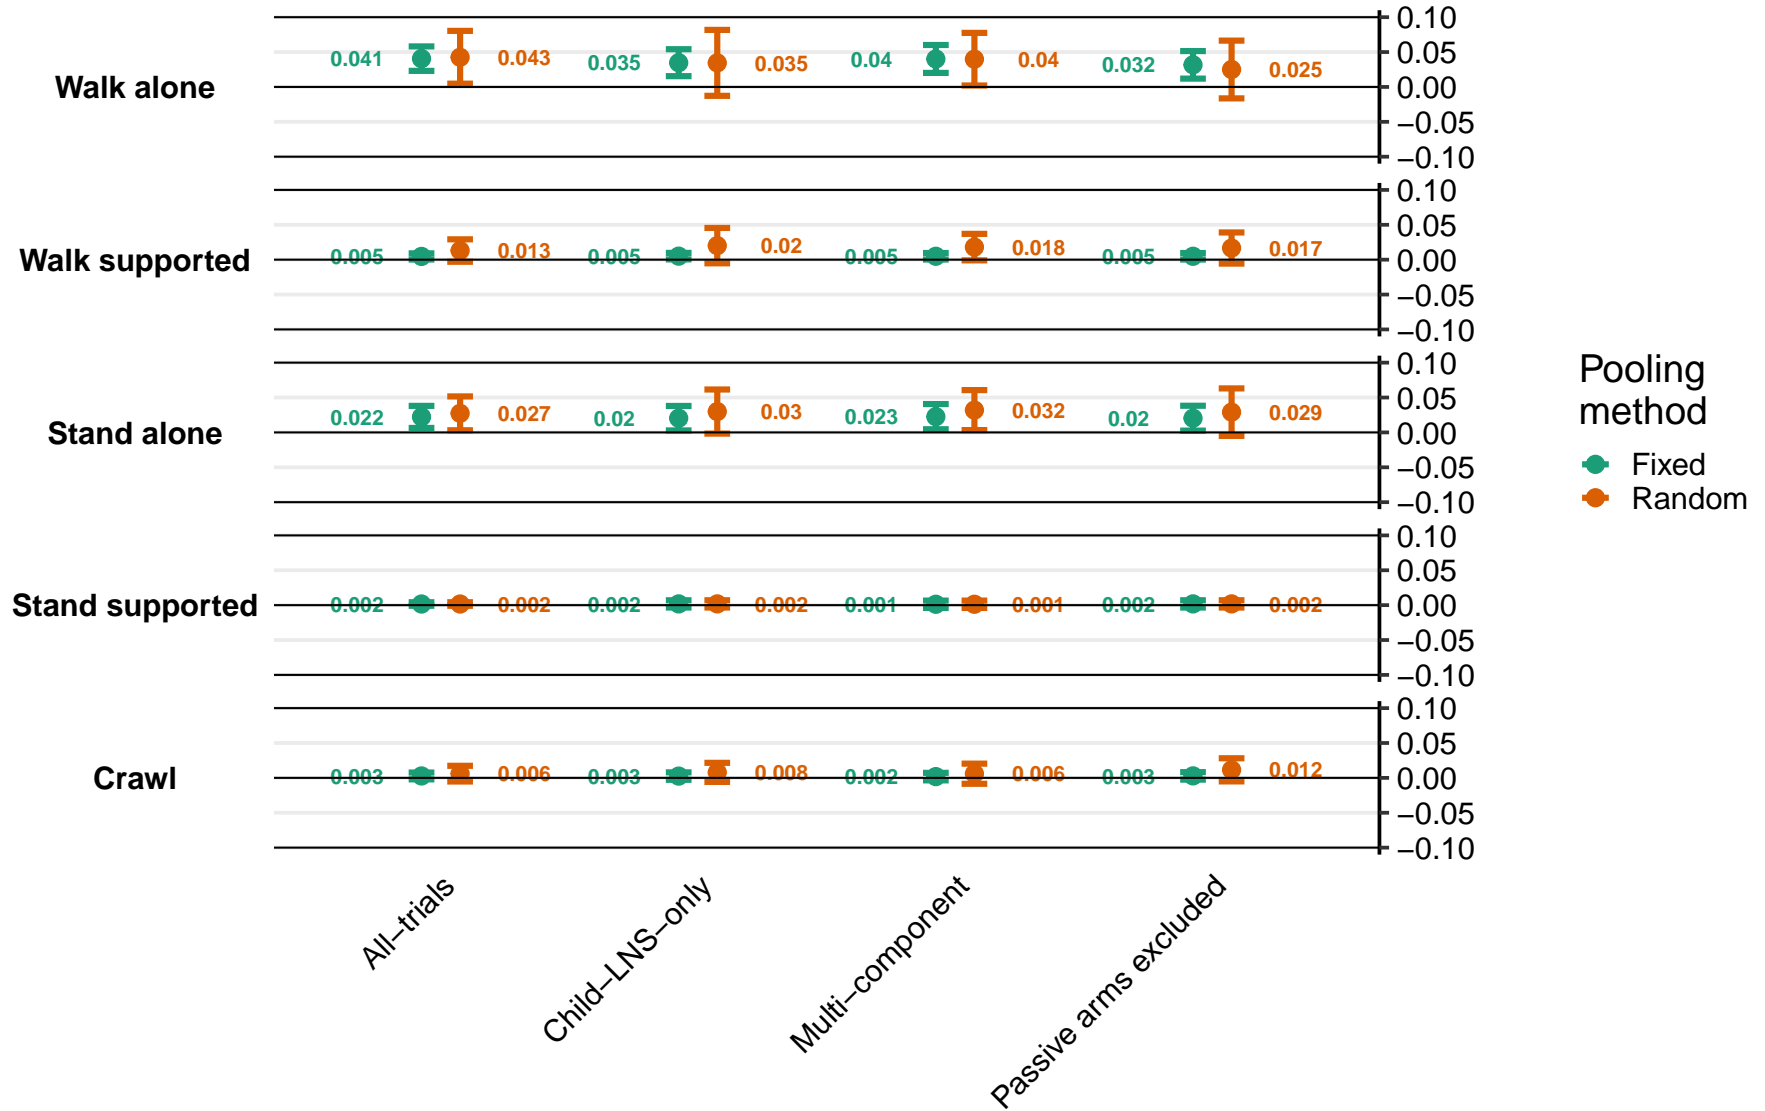

### Supplemental figure 2F: Prevalence ratios for 18 mo milestone outcomes

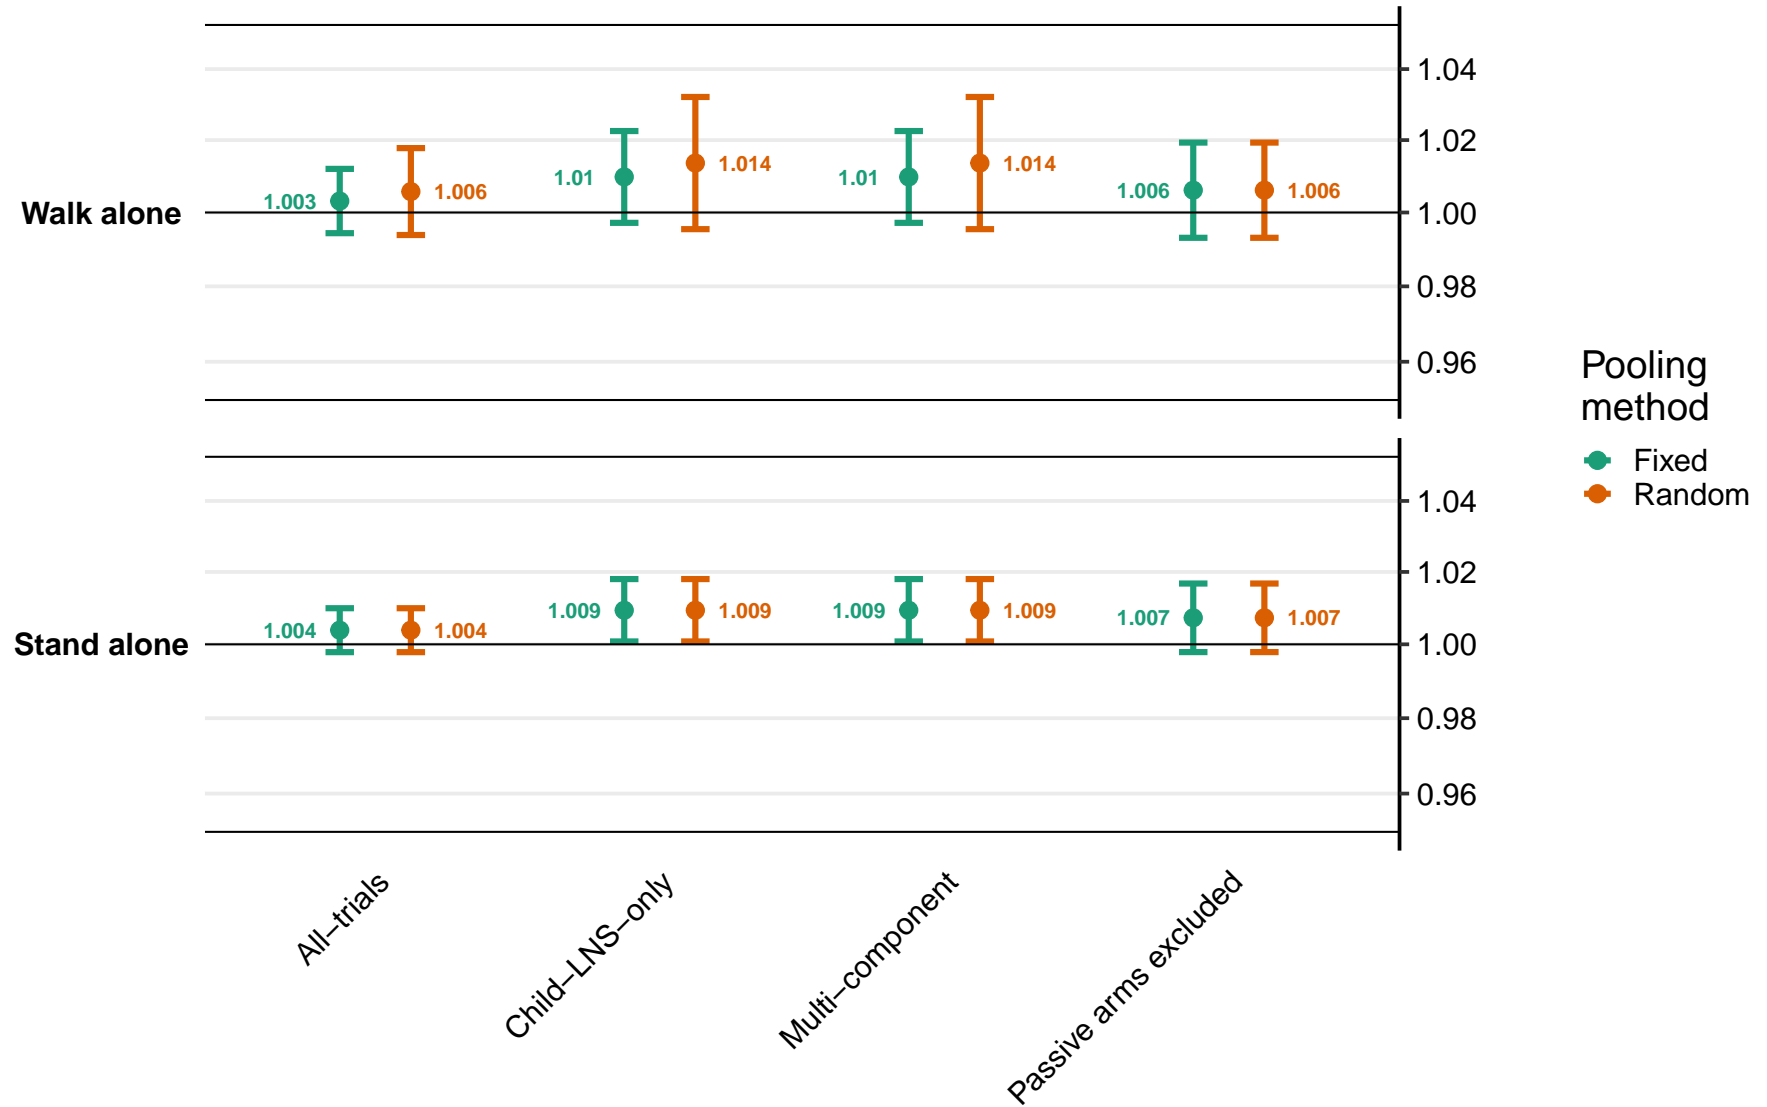



### Supplemental figure 2G: Prevalence differences for 18 mo milestone outcomes

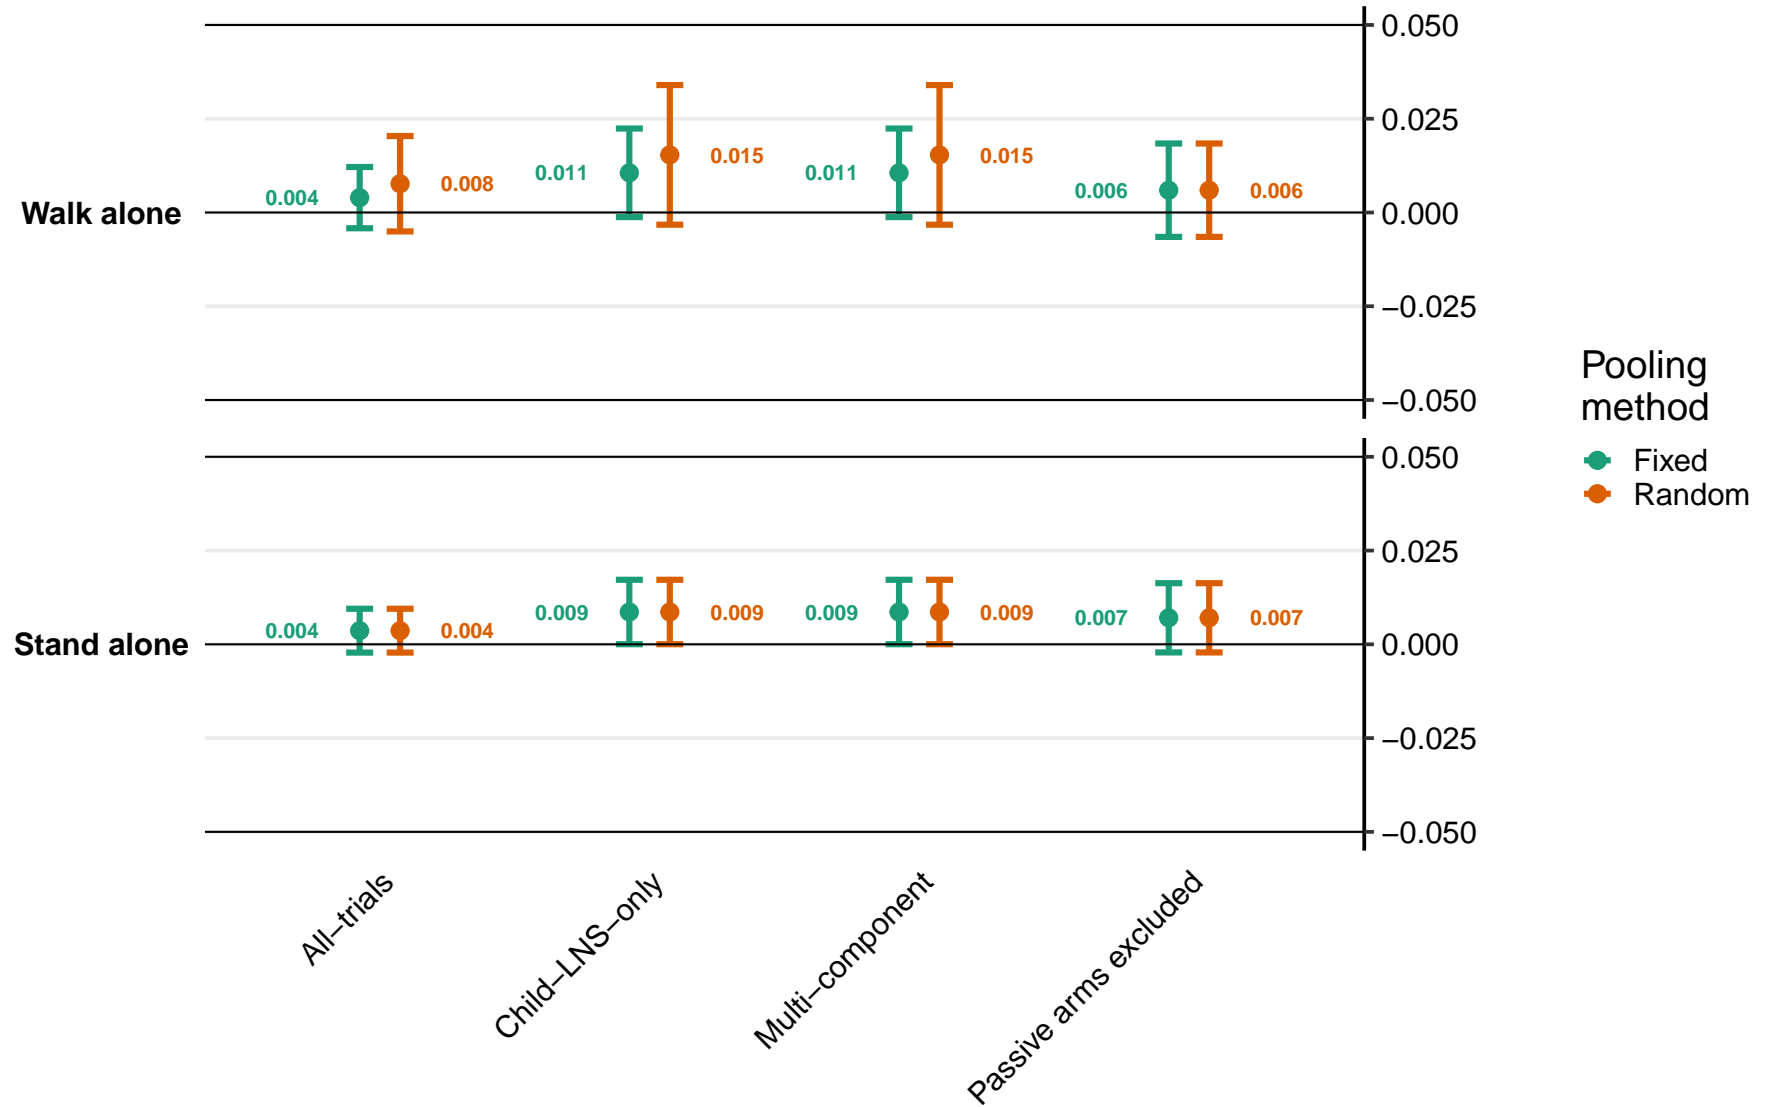

## Supplemental figure 3: Forest plots for all main effects of SQ-LNS on developmental outcomes

### Contents

|                                                                                |    |
|--------------------------------------------------------------------------------|----|
| Supplemental figure 3A: Mean difference in language z-score                    | 3  |
| Supplemental figure 3B: Language lowest decile prevalence ratio                | 4  |
| Supplemental figure 3C: Language lowest decile prevalence difference           | 5  |
| Supplemental figure 3D: Mean difference in social-emotional z-score            | 6  |
| Supplemental figure 3E: Social-emotional lowest decile prevalence ratio        | 7  |
| Supplemental figure 3F: Social-emotional lowest decile prevalence difference   | 8  |
| Supplemental figure 3G: Mean difference in motor z-score                       | 9  |
| Supplemental figure 3H: Motor lowest decile prevalence ratio                   | 10 |
| Supplemental figure 3I: Motor lowest decile prevalence difference              | 11 |
| Supplemental figure 3J: Mean difference in gross motor z-score                 | 12 |
| Supplemental figure 3K: Mean difference in fine motor z-score                  | 13 |
| Supplemental figure 3L: Mean difference in executive function z-score          | 14 |
| Supplemental figure 3M: Executive function lowest decile prevalence ratio      | 15 |
| Supplemental figure 3N: Executive function lowest decile prevalence difference | 16 |
| Supplemental figure 3O: 12-mo walking without support prevalence ratio         | 17 |
| Supplemental figure 3P: 12-mo walking without support prevalence difference    | 18 |
| Supplemental figure 3Q: 12-mo walking with support prevalence ratio            | 19 |
| Supplemental figure 3R: 12-mo walking with support prevalence difference       | 20 |
| Supplemental figure 3S: 12-mo standing without support prevalence ratio        | 21 |
| Supplemental figure 3T: 12-mo standing without support prevalence difference   | 22 |
| Supplemental figure 3U: 12-mo standing with support prevalence ratio           | 23 |
| Supplemental figure 3V: 12-mo standing with support prevalence difference      | 24 |
| Supplemental figure 3W: 12-mo crawling prevalence ratio                        | 25 |
| Supplemental figure 3X: 12-mo crawling prevalence difference                   | 26 |
| Supplemental figure 3Y: 18-mo walking without support prevalence ratio         | 27 |
| Supplemental figure 3Z: 18-mo walking without support prevalence difference    | 28 |

Supplemental figure 3AA: 18-mo walking with support prevalence ratio

29

Supplemental figure 3AB: 18-mo walking with support prevalence difference

30

These figures are forest plots showing the study-level estimates of intervention effect with the pooled estimate in the bottom summary rows. For continuous outcomes the intervention effect is measured by the difference in mean of the LNS group minus control. For dichotomous outcomes analyzed via prevalence ratios the effect estimate is the prevalence in the LNS group divided by the prevalence in the control group. For dichotomous outcomes analyzed via prevalence differences the effect estimate is the prevalence in the LNS group minus the prevalence in the control group. The labels on the left y-axis correspond to trial level information. The values on the right indicate the study level effect estimate, confidence interval, and weighting for deriving the pooled estimate.

Motor milestone figures show individual trial estimates excluding the JiVitA-4 data because those individual trial results have not yet been published. The pooled estimate in each figure includes the JiVitA-4 data, for consistency with all other analyses.

Figures showing individual trial estimates for the SHINE trial are split by comparison to reflect the cross-over design. For calculating the pooled estimates shown in these figures, the trial is analyzed with LNS intervention arms combined and non-LNS intervention arms combined.

Supplemental figure 3A: Mean difference in language z-score

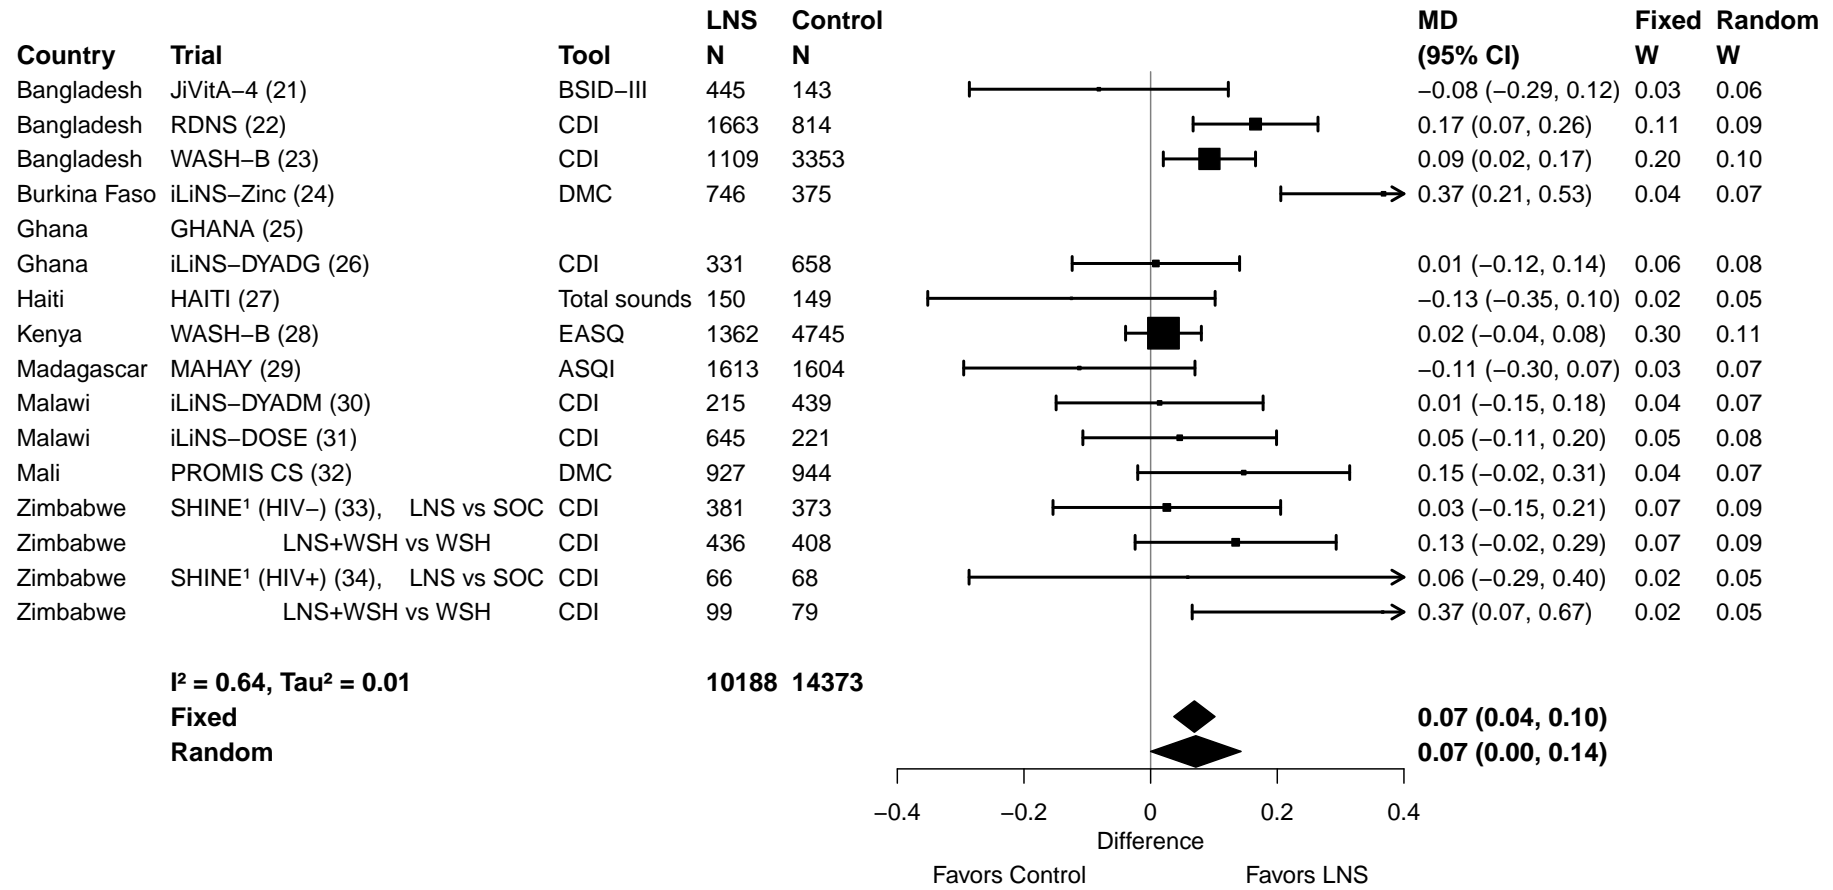

### Supplemental figure 3B: Language lowest decile prevalence ratio

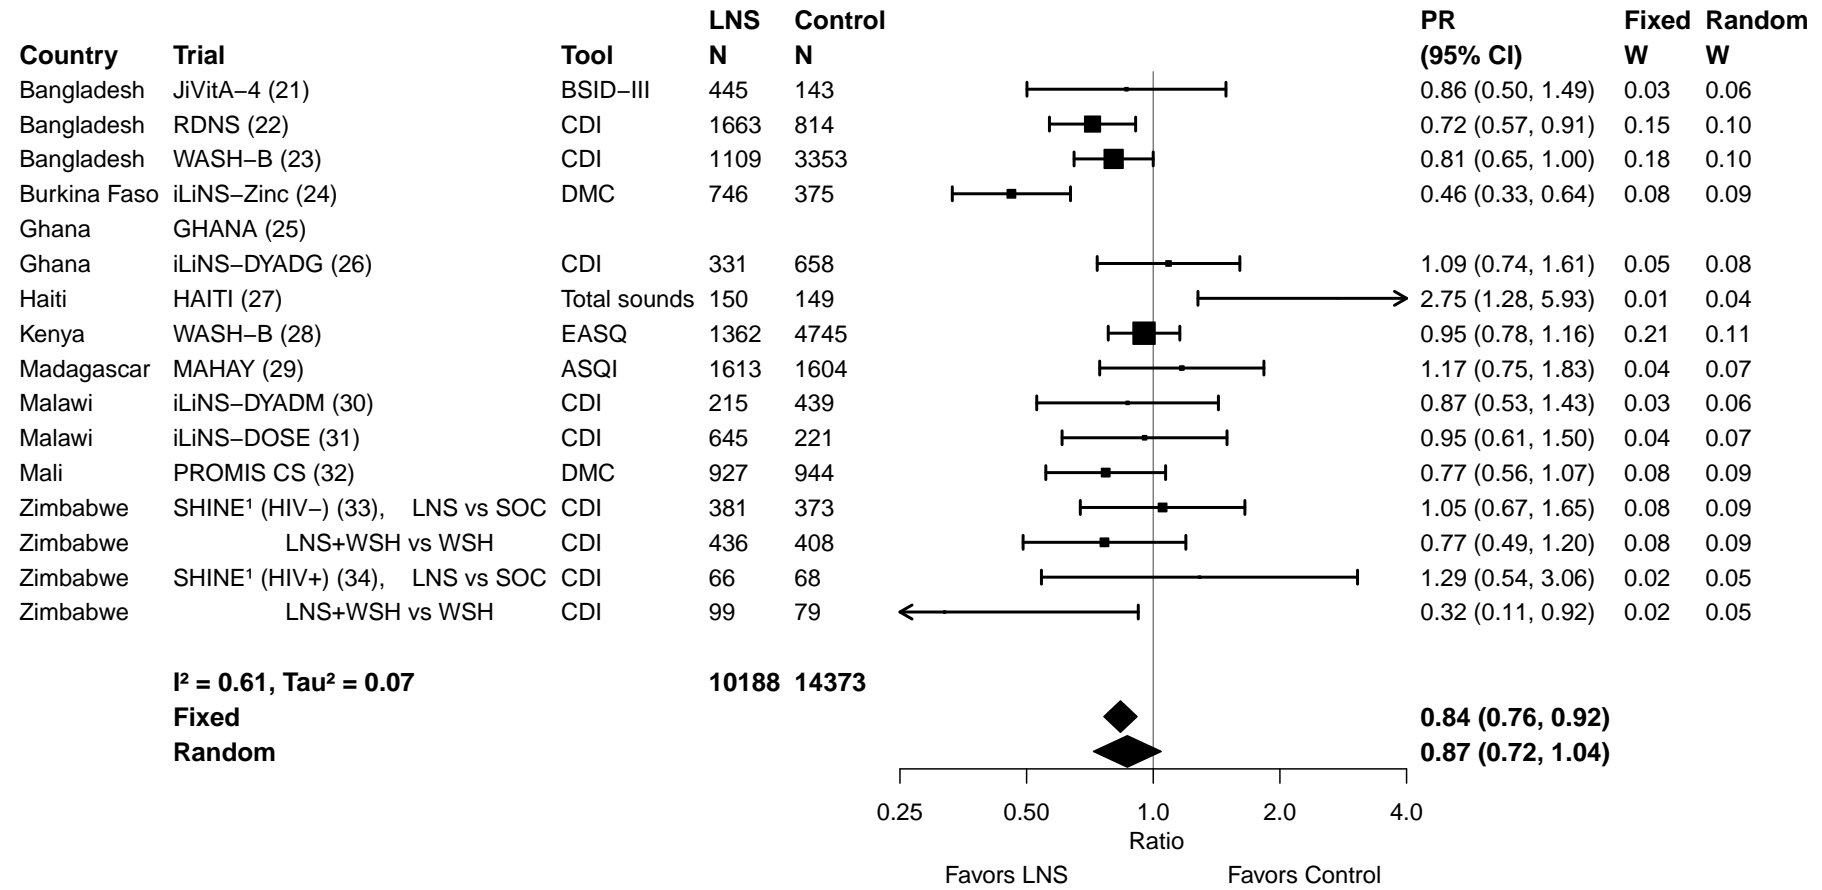

### Supplemental figure 3C: Language lowest decile prevalence difference

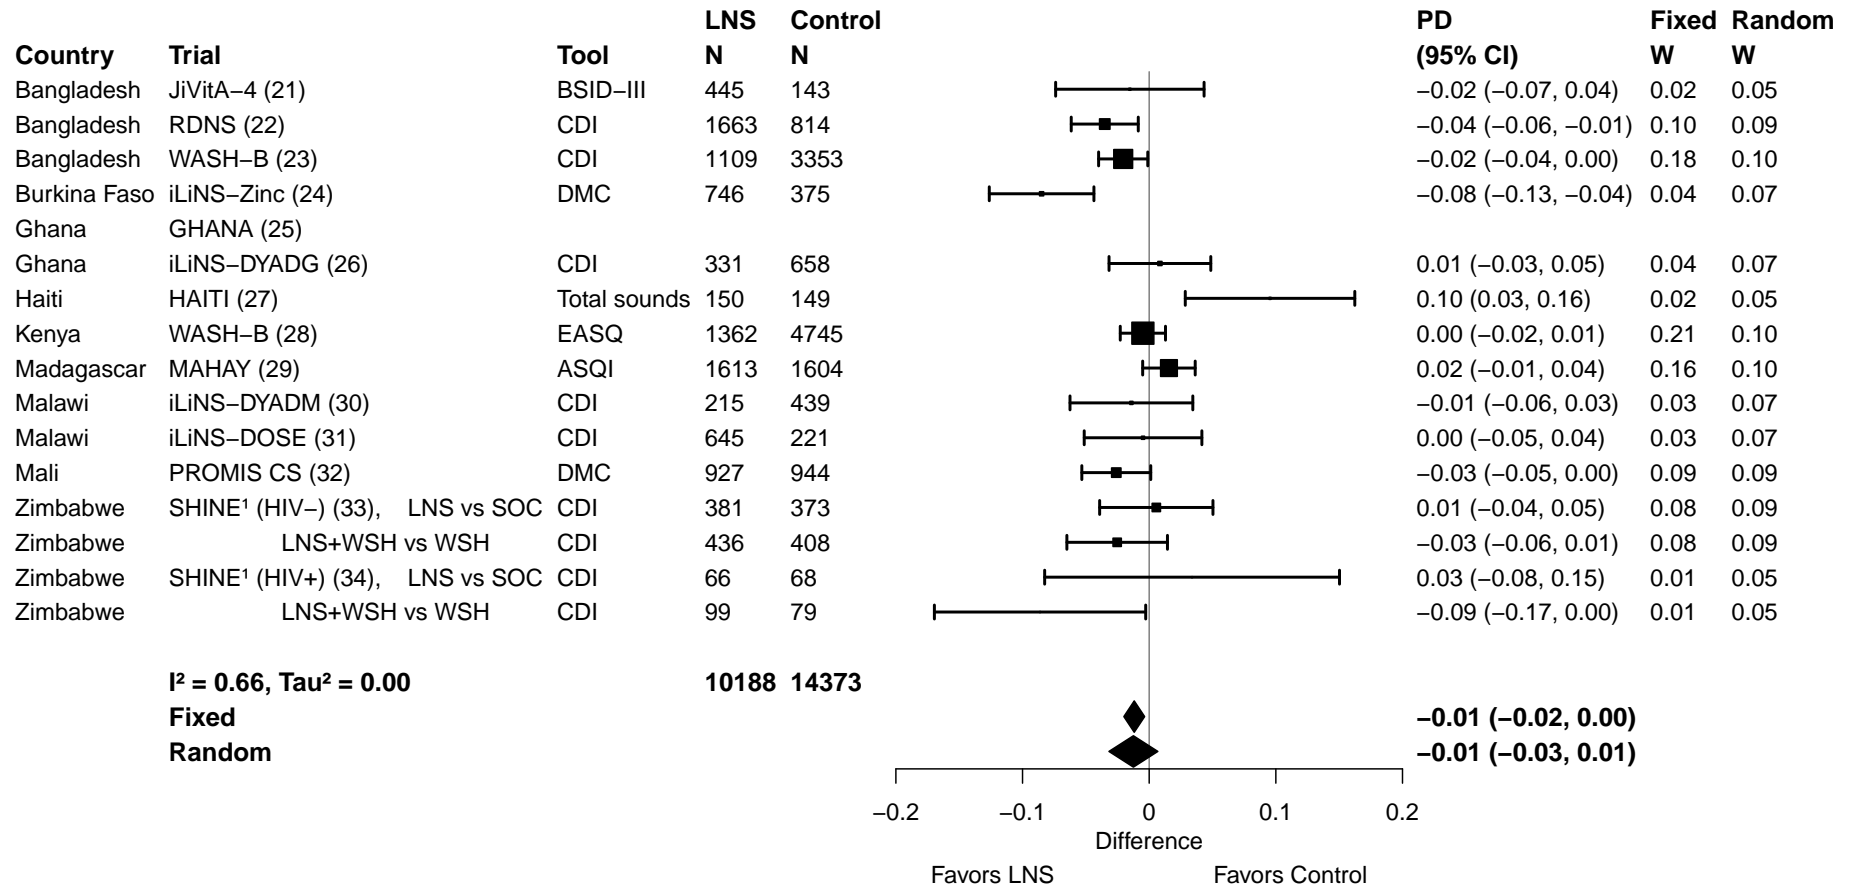

Supplemental figure 3D: Mean difference in social-emotional z-score

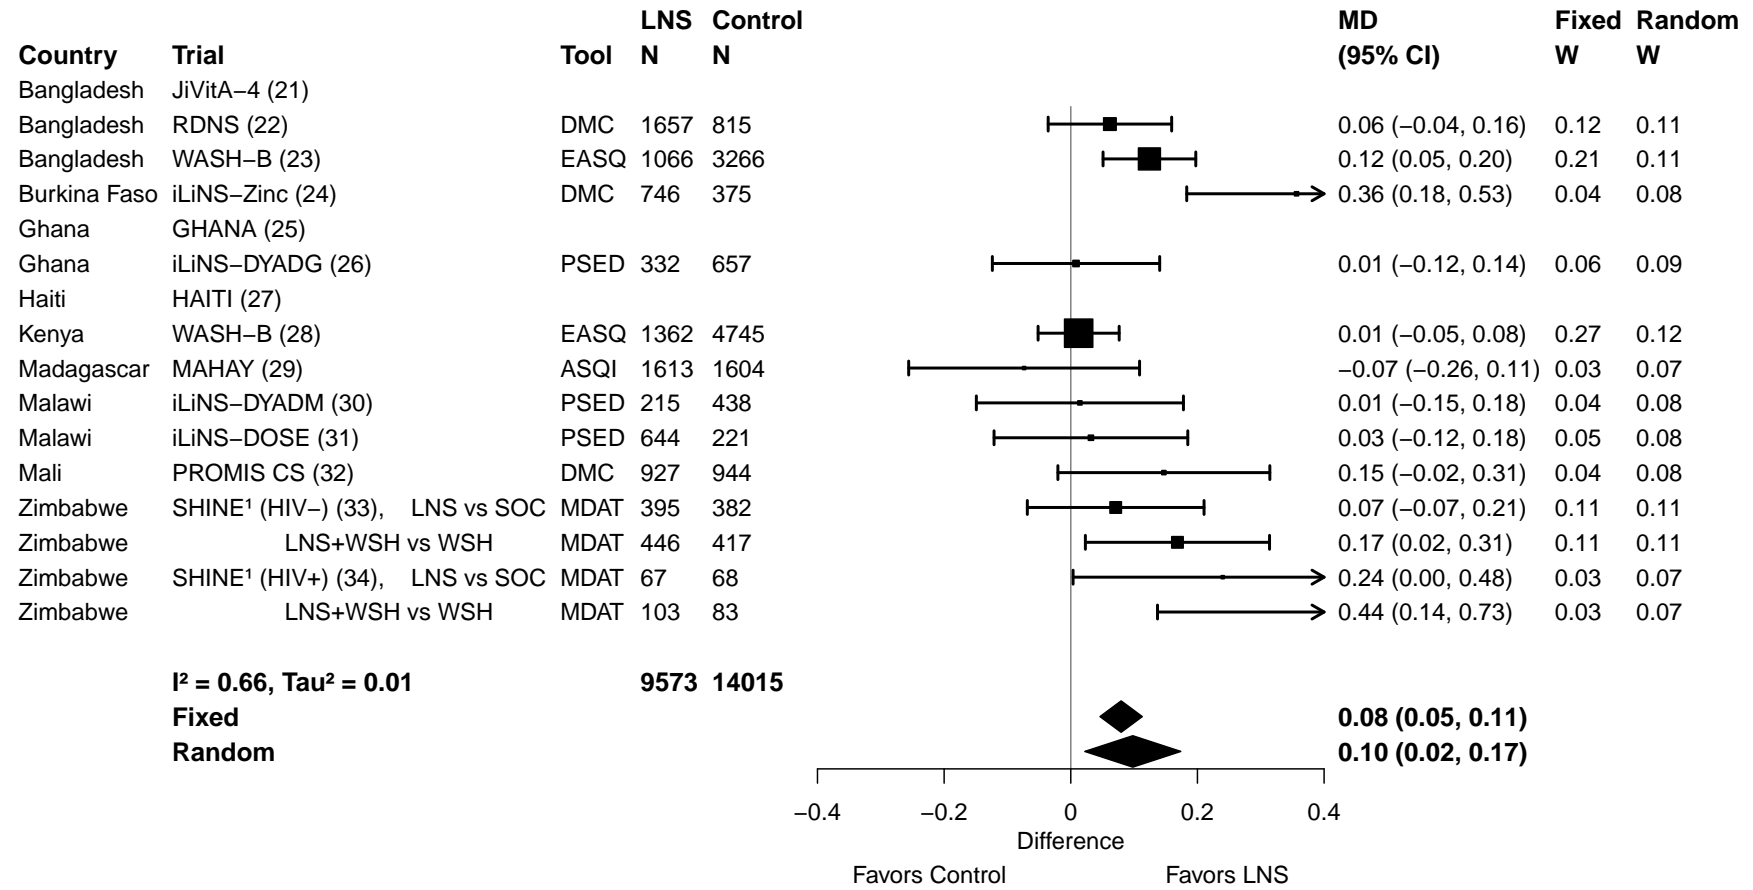

### Supplemental figure 3E: Social-emotional lowest decile prevalence ratio

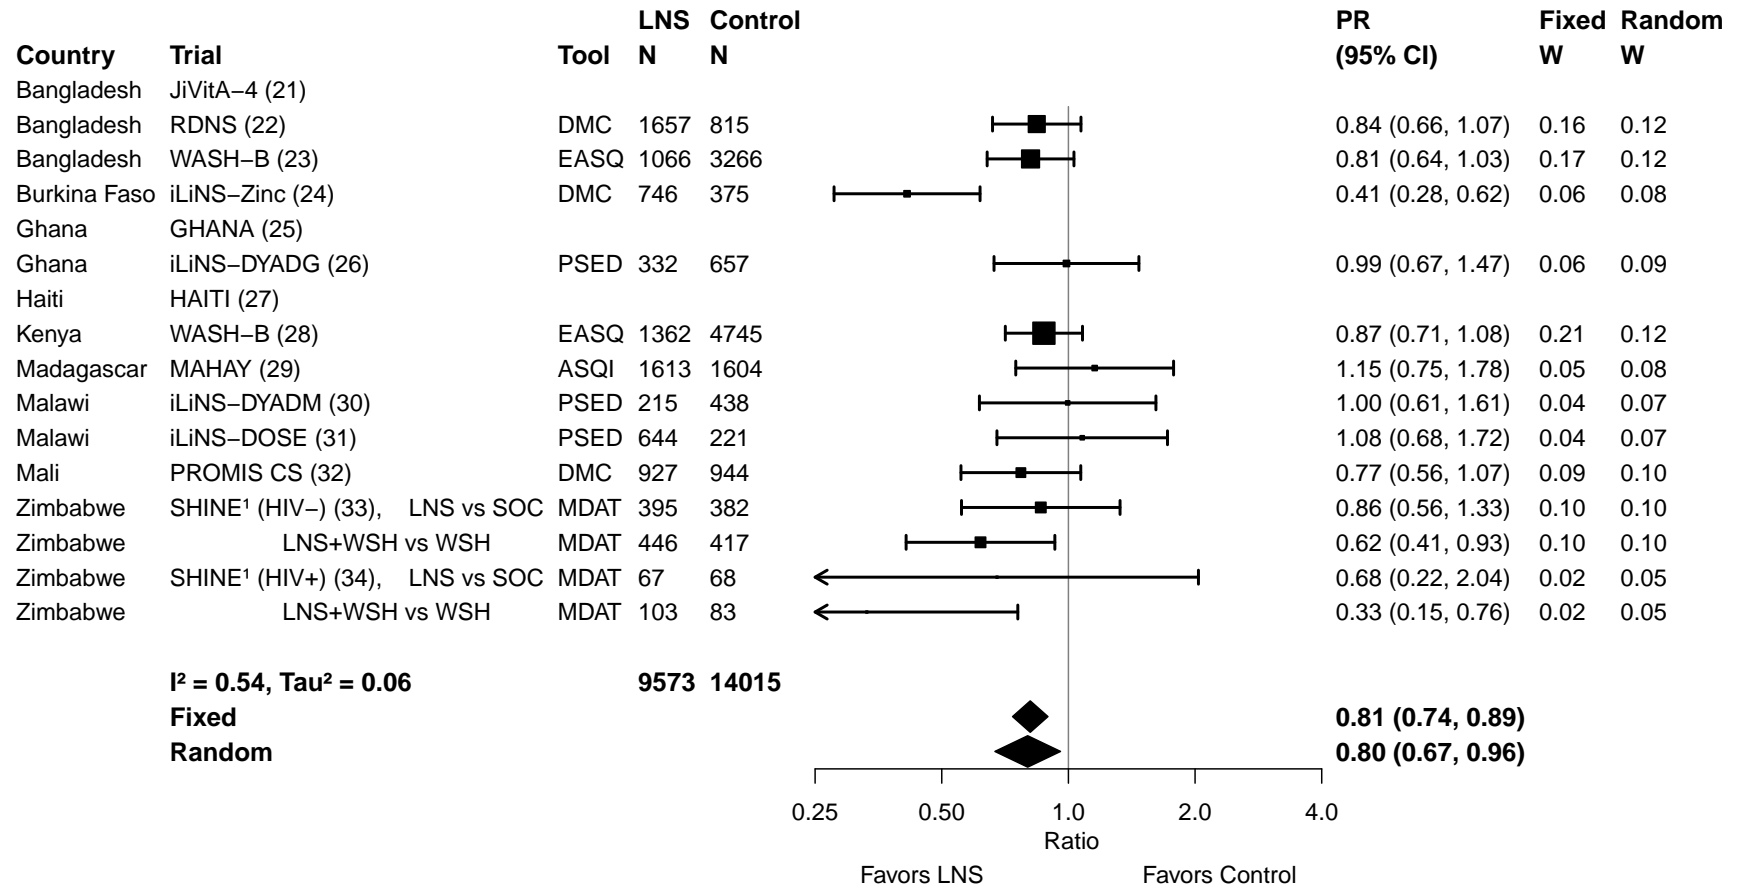



Supplemental figure 3F: Social-emotional lowest decile prevalence difference

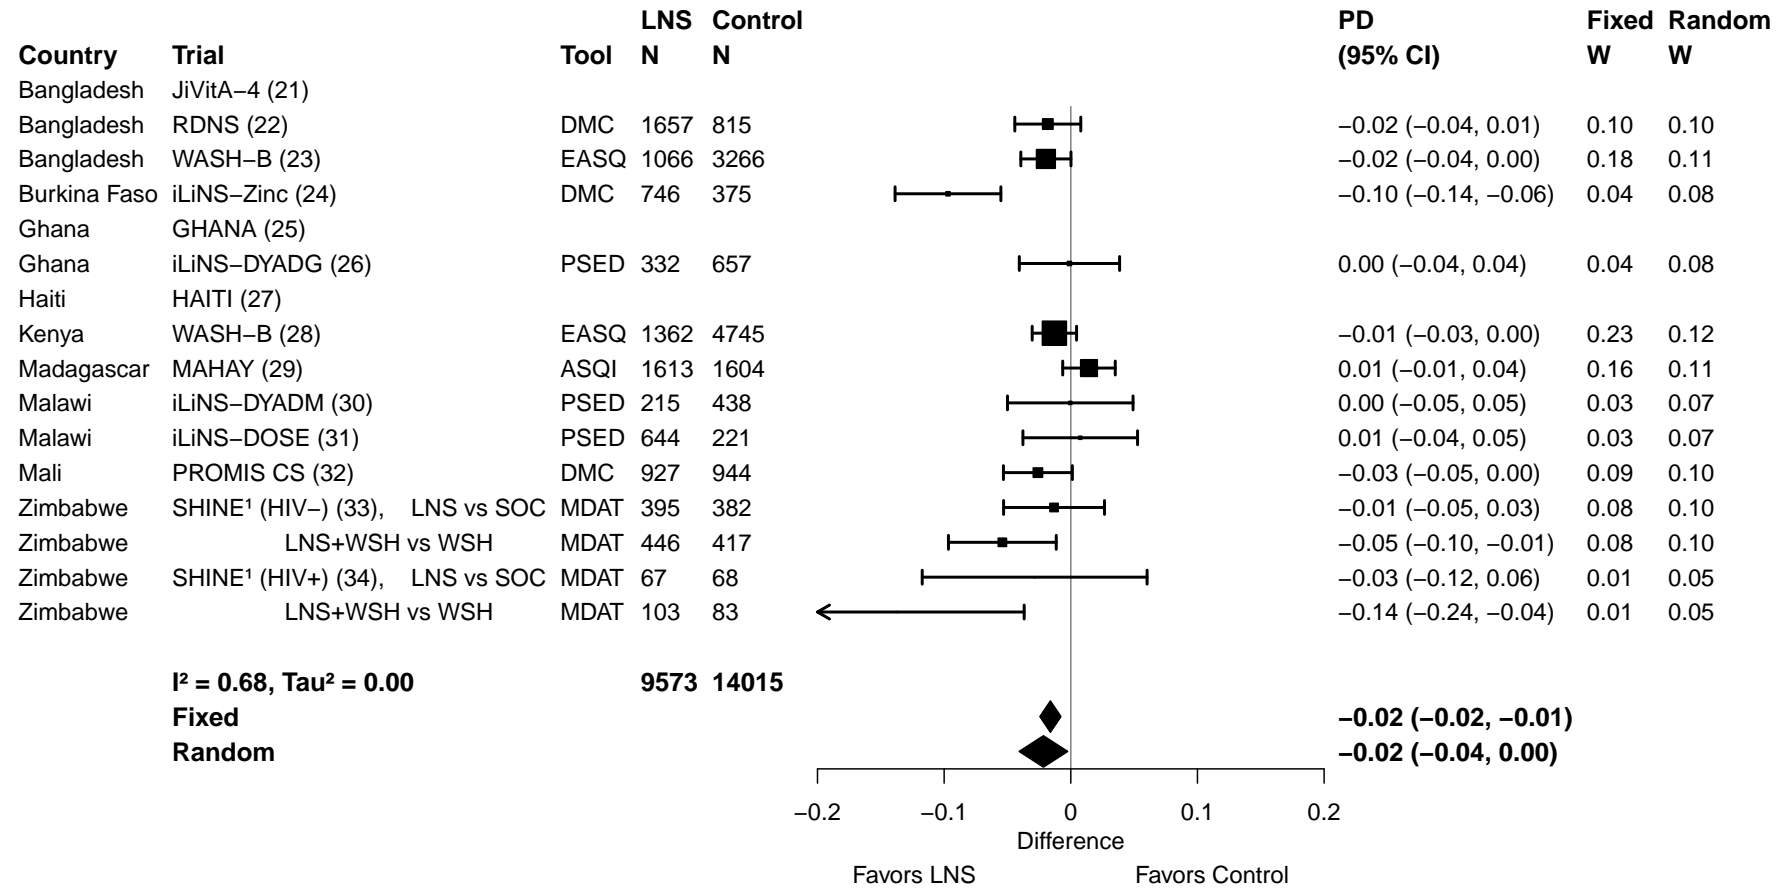

Supplemental figure 3G: Mean difference in motor z-score

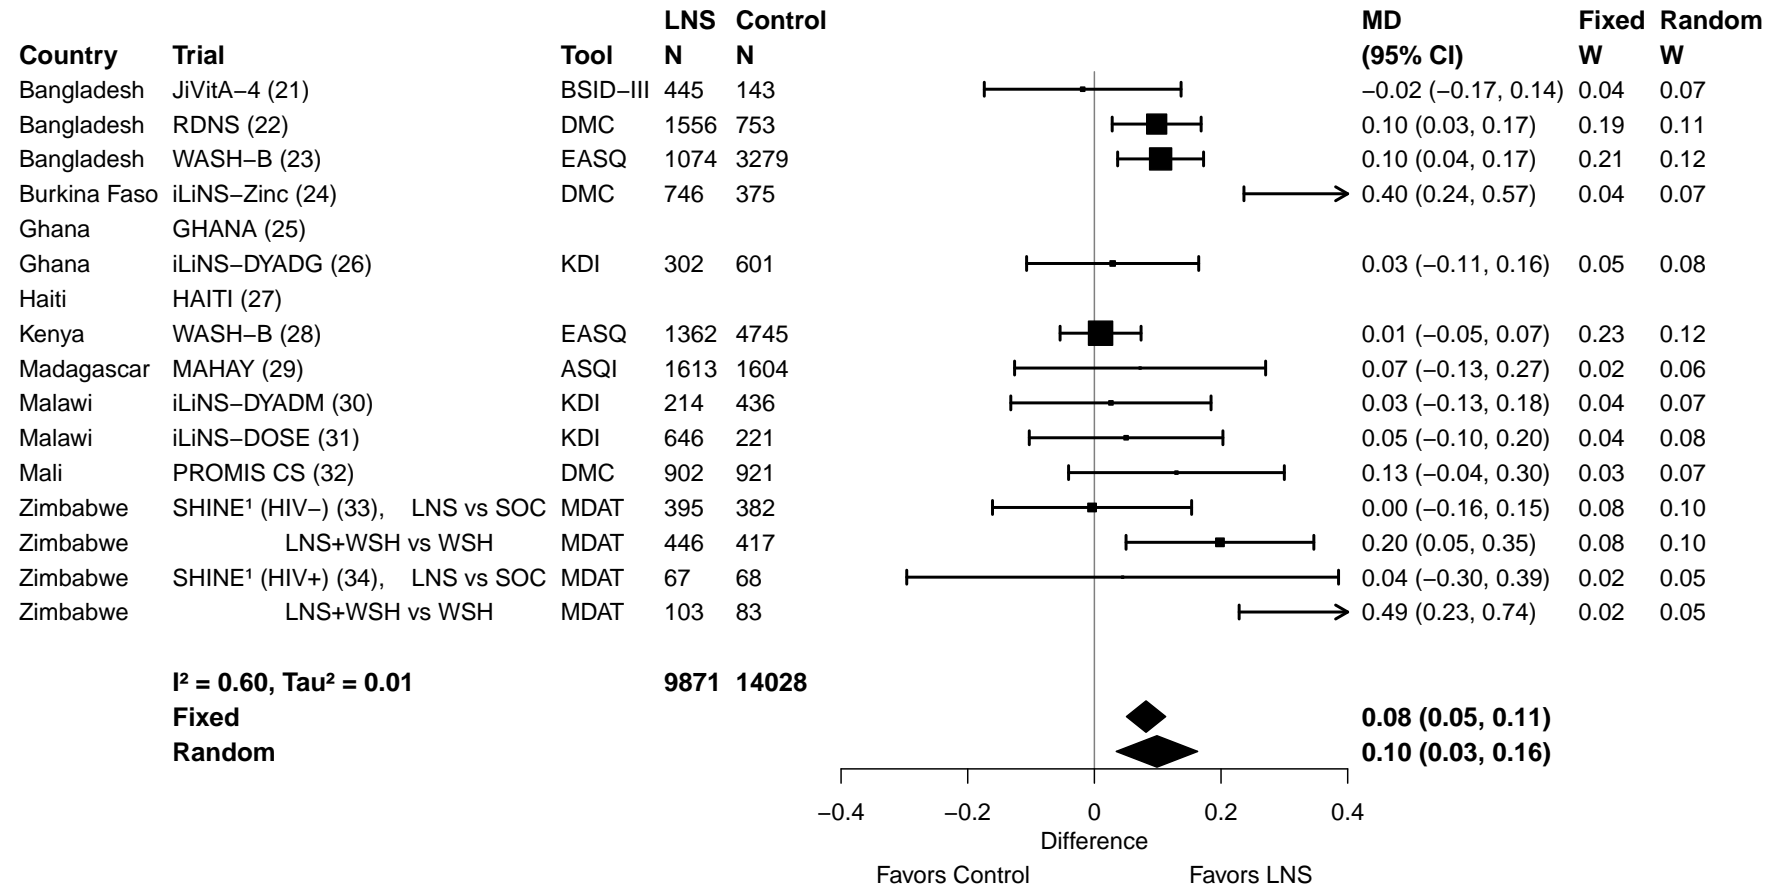

### Supplemental figure 3H: Motor lowest decile prevalence ratio

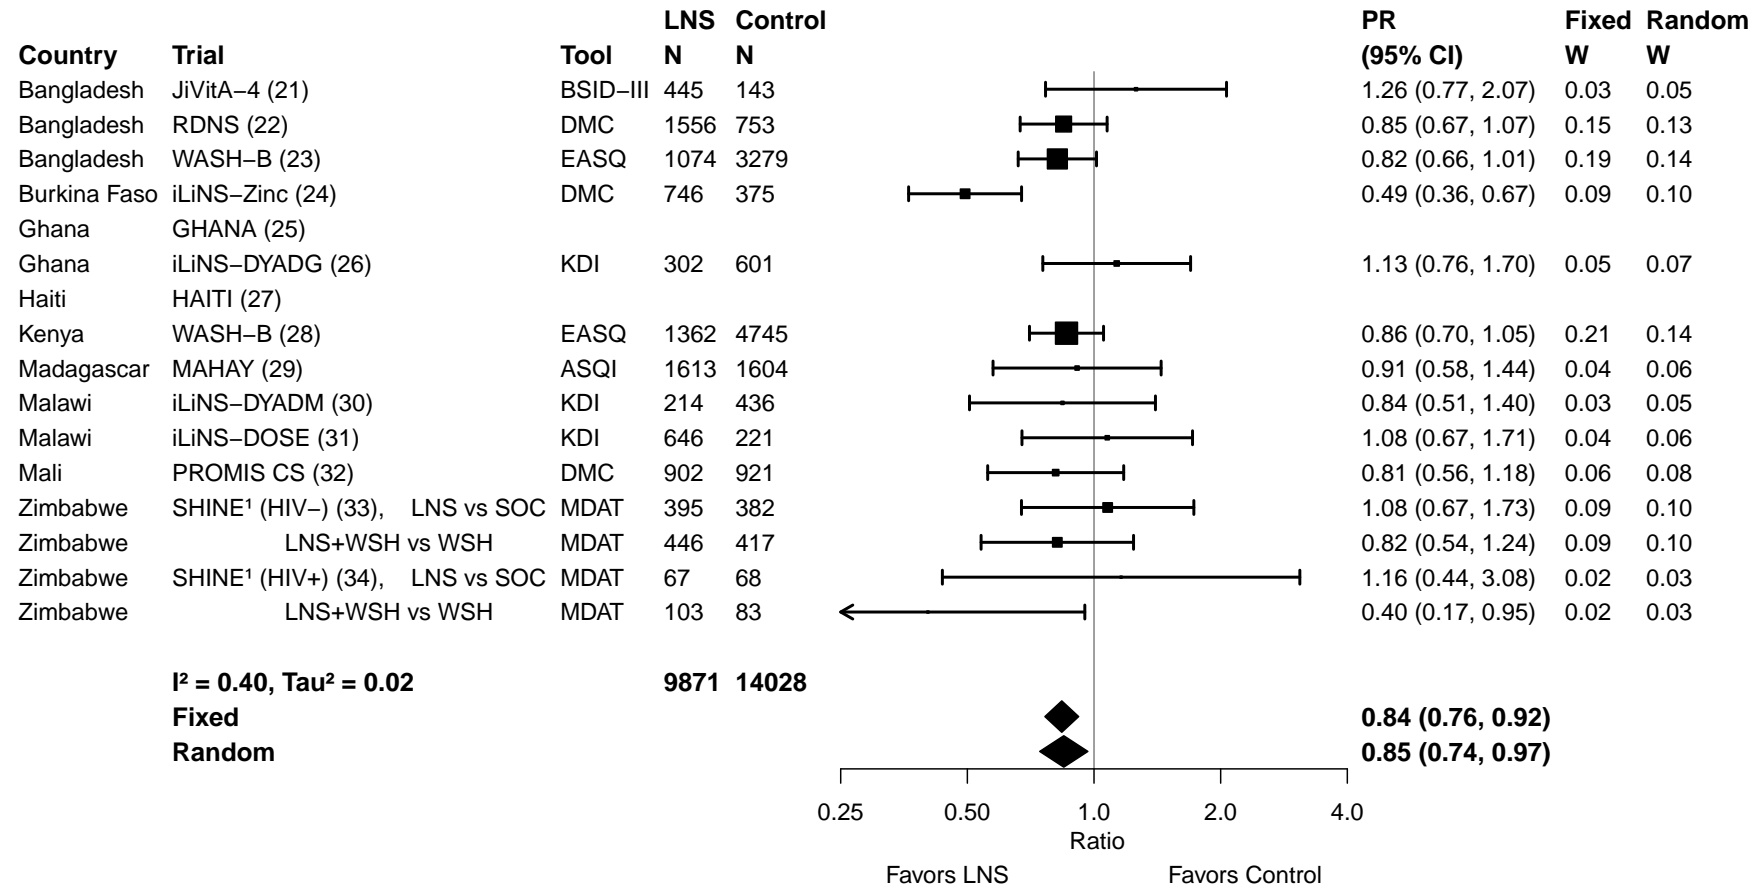

### Supplemental figure 3I: Motor lowest decile prevalence difference

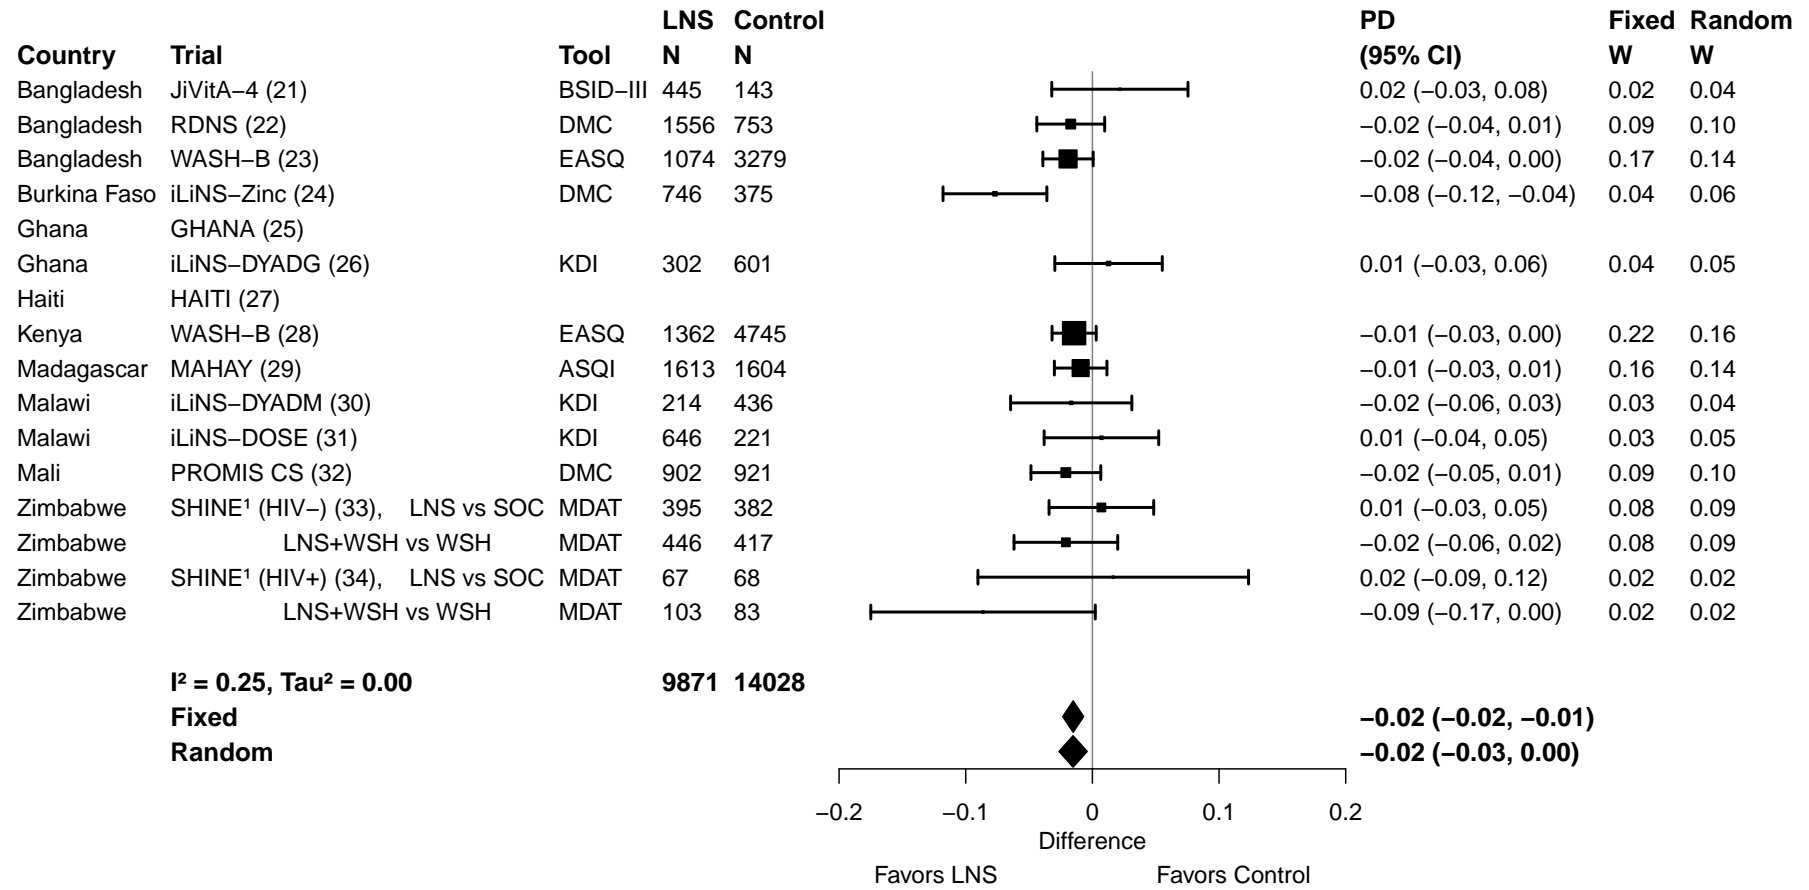

### Supplemental figure 3J: Mean difference in gross motor z-score

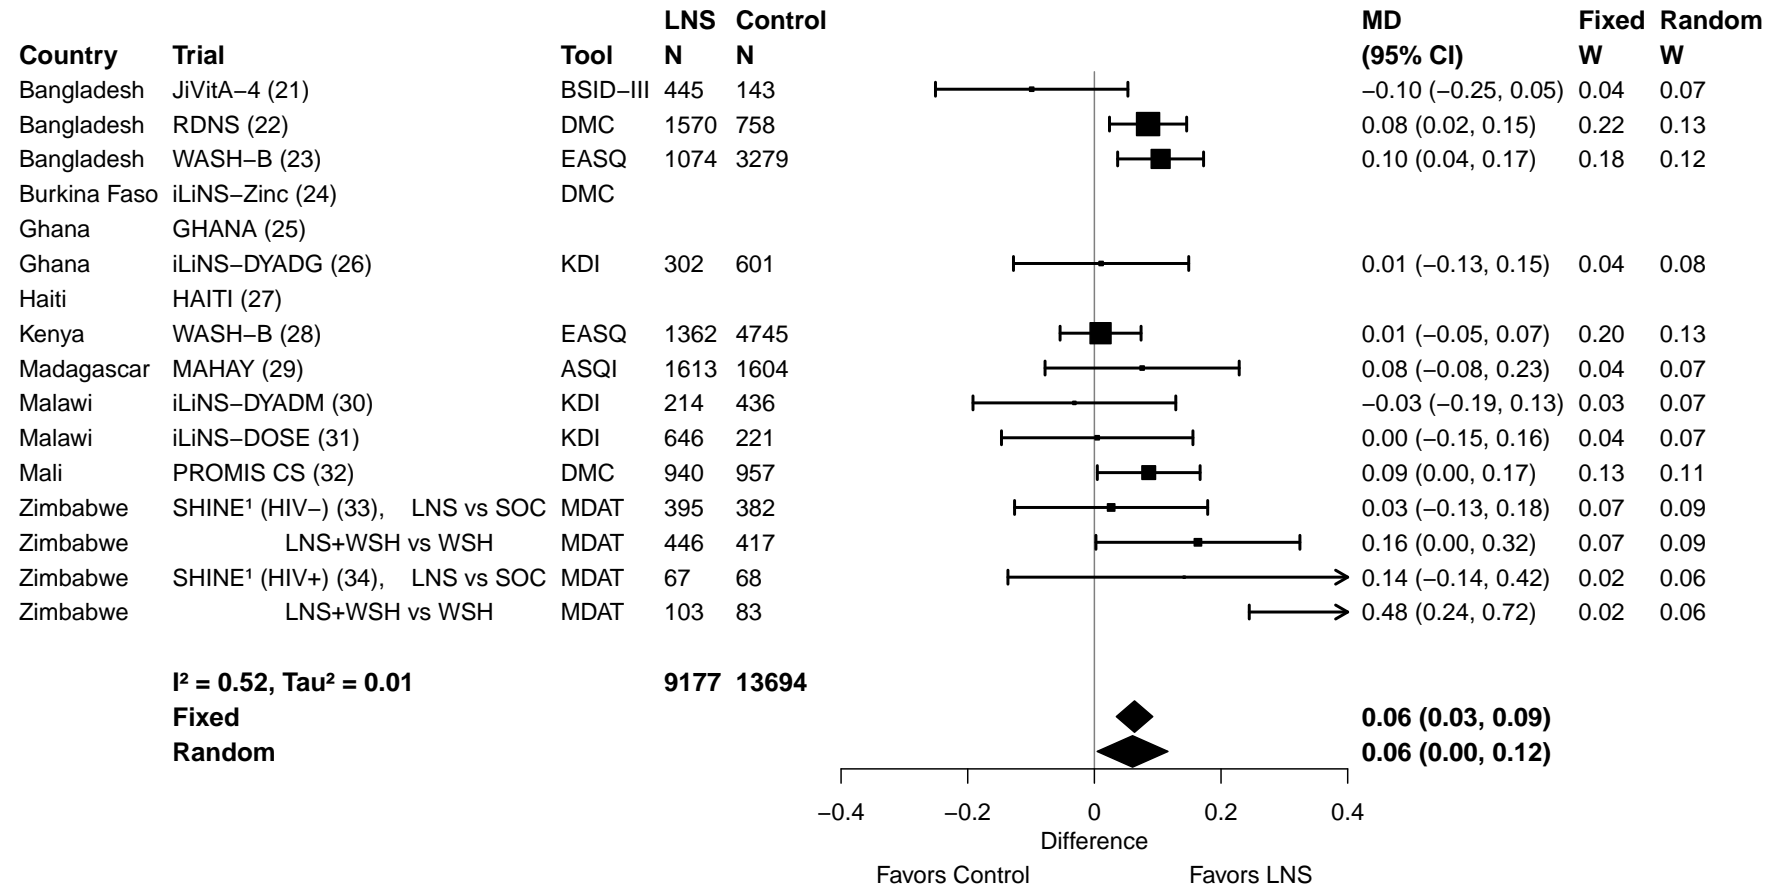

Supplemental figure 3K: Mean difference in fine motor z-score

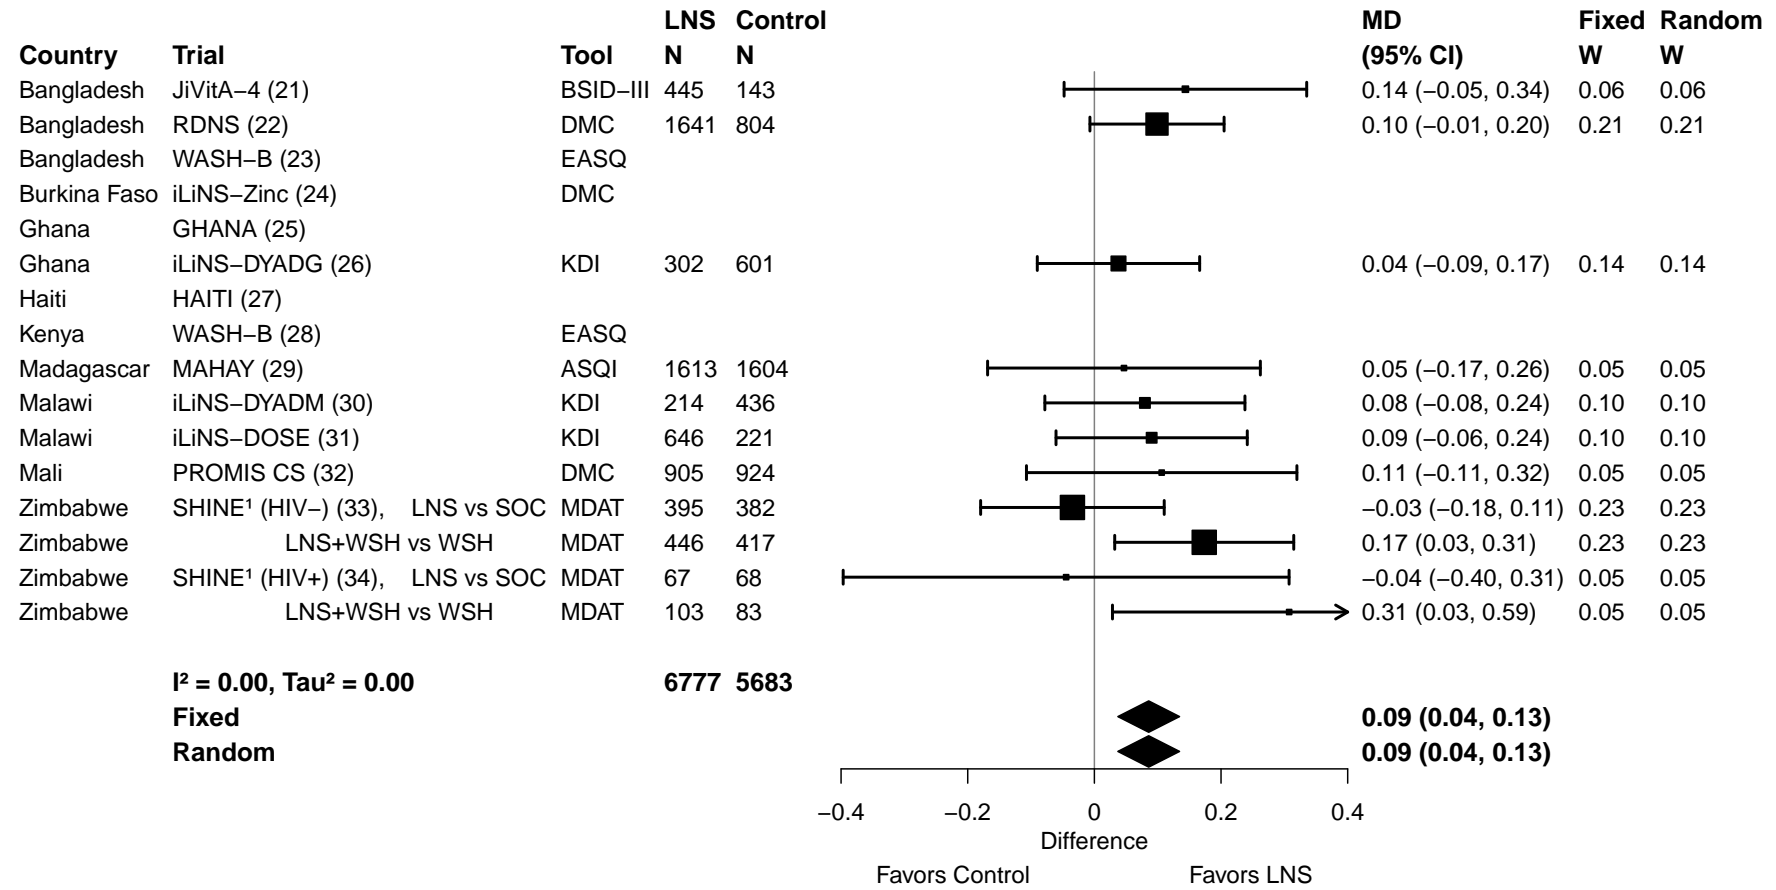

Supplemental figure 3L: Mean difference in executive function z-score

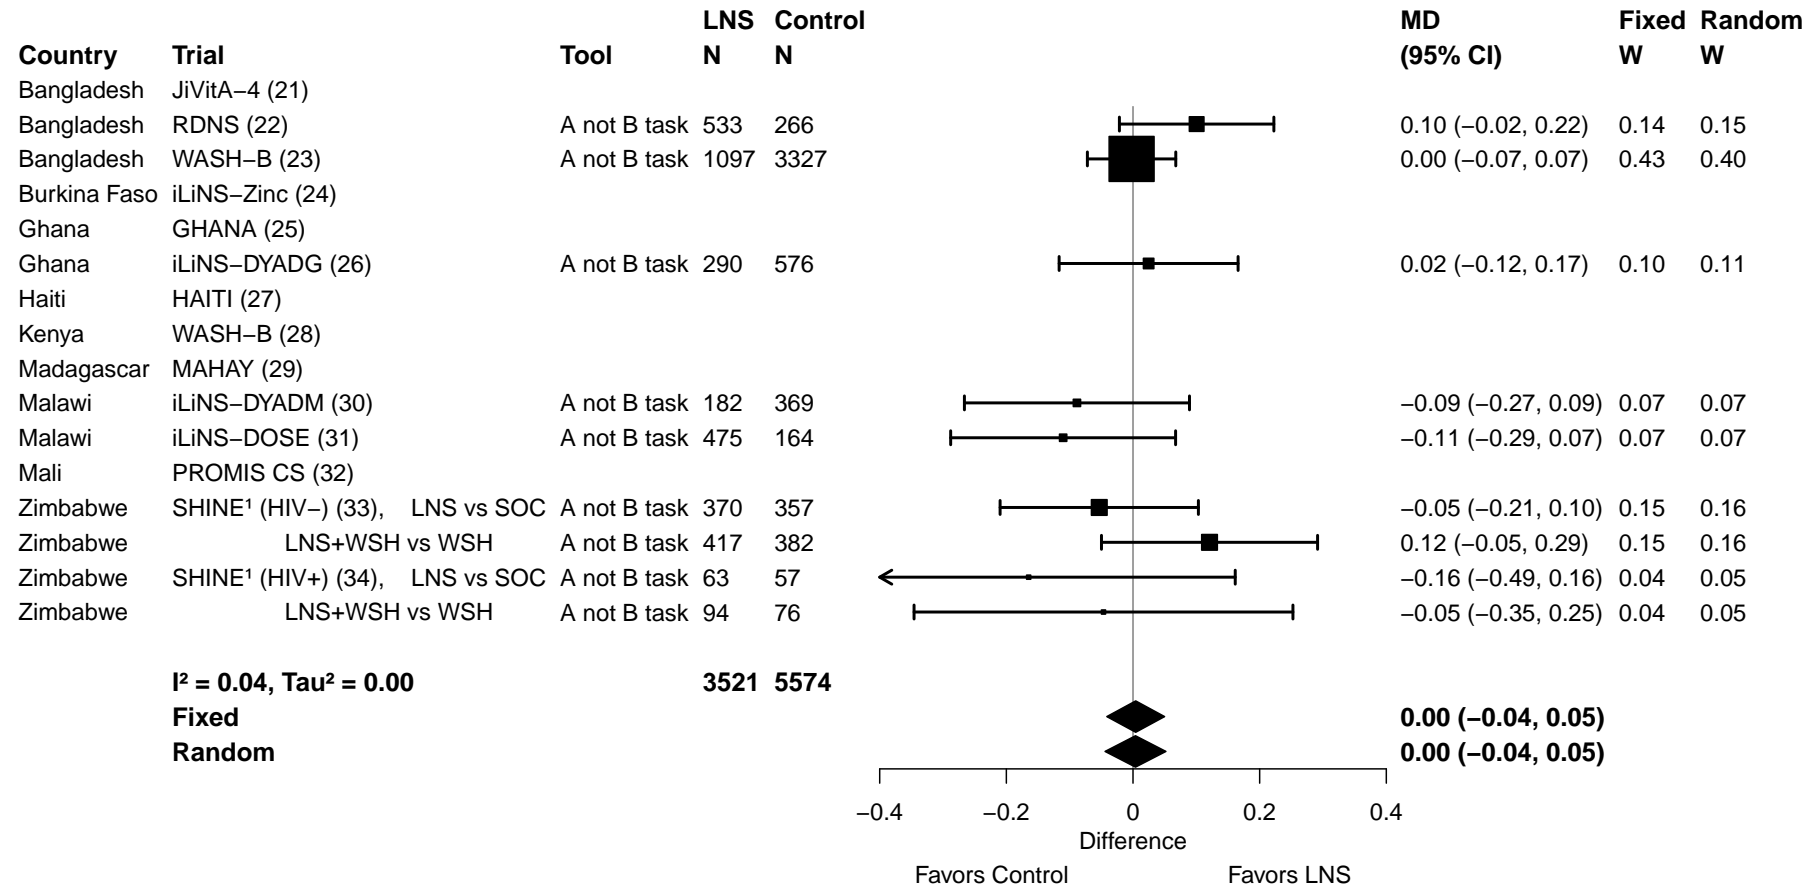

### Supplemental figure 3M: Executive function lowest decile prevalence ratio

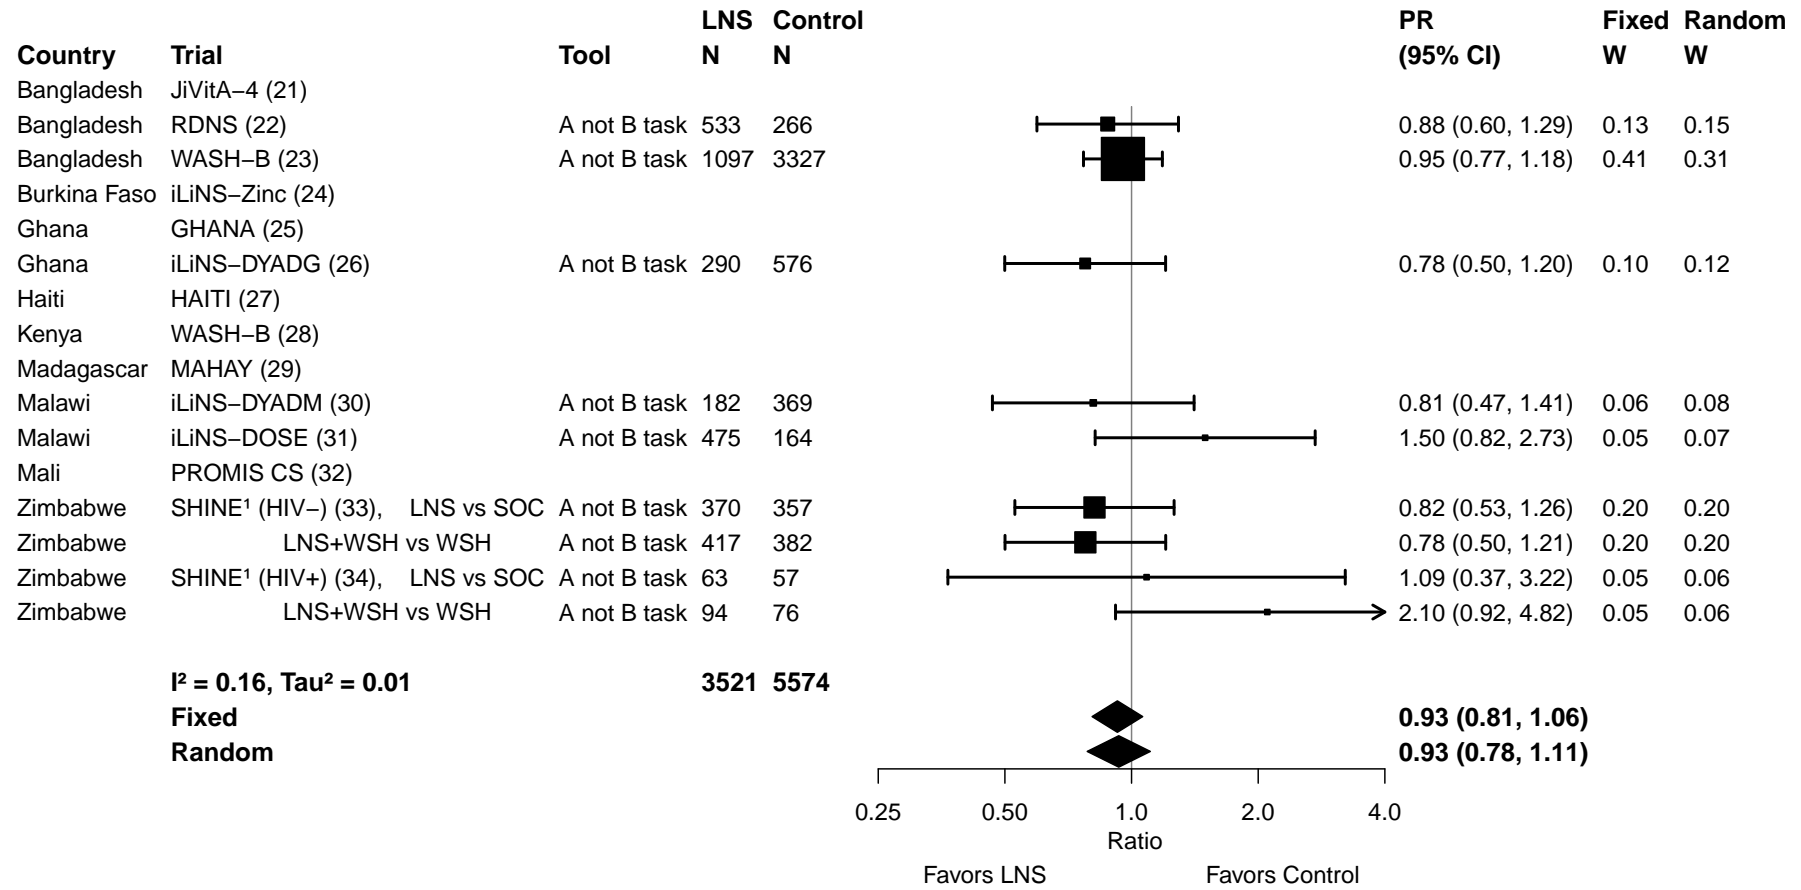



### Supplemental figure 3N: Executive function lowest decile prevalence difference

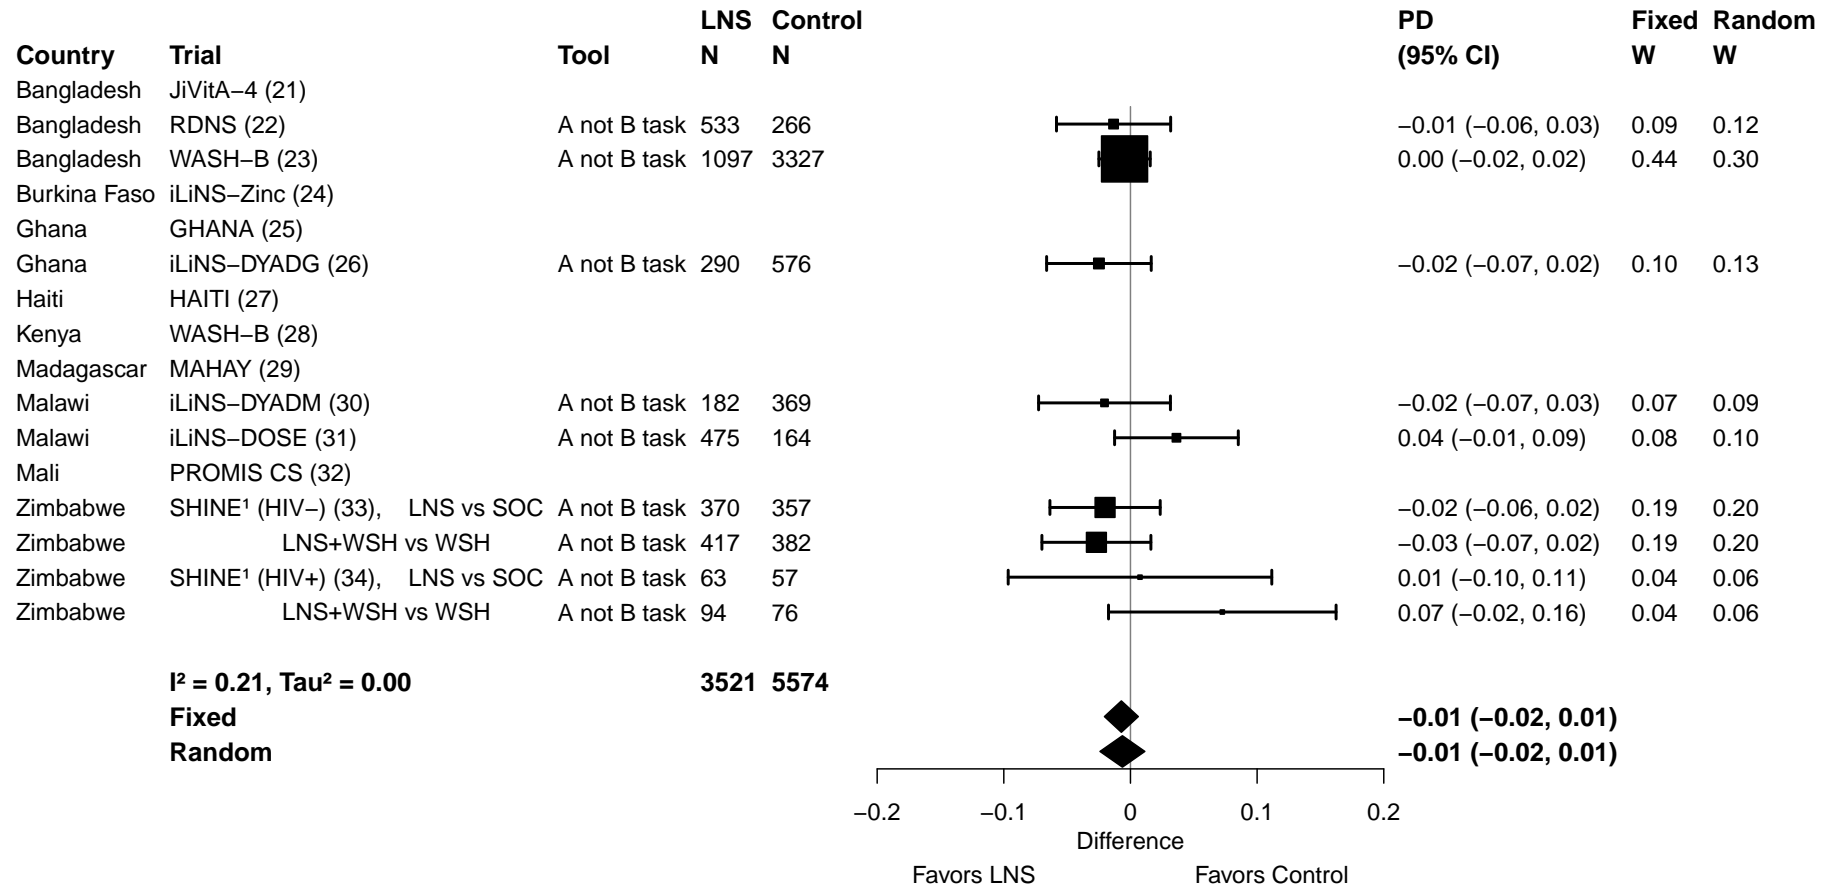

Supplemental figure 3O: 12-mo walking without support prevalence ratio

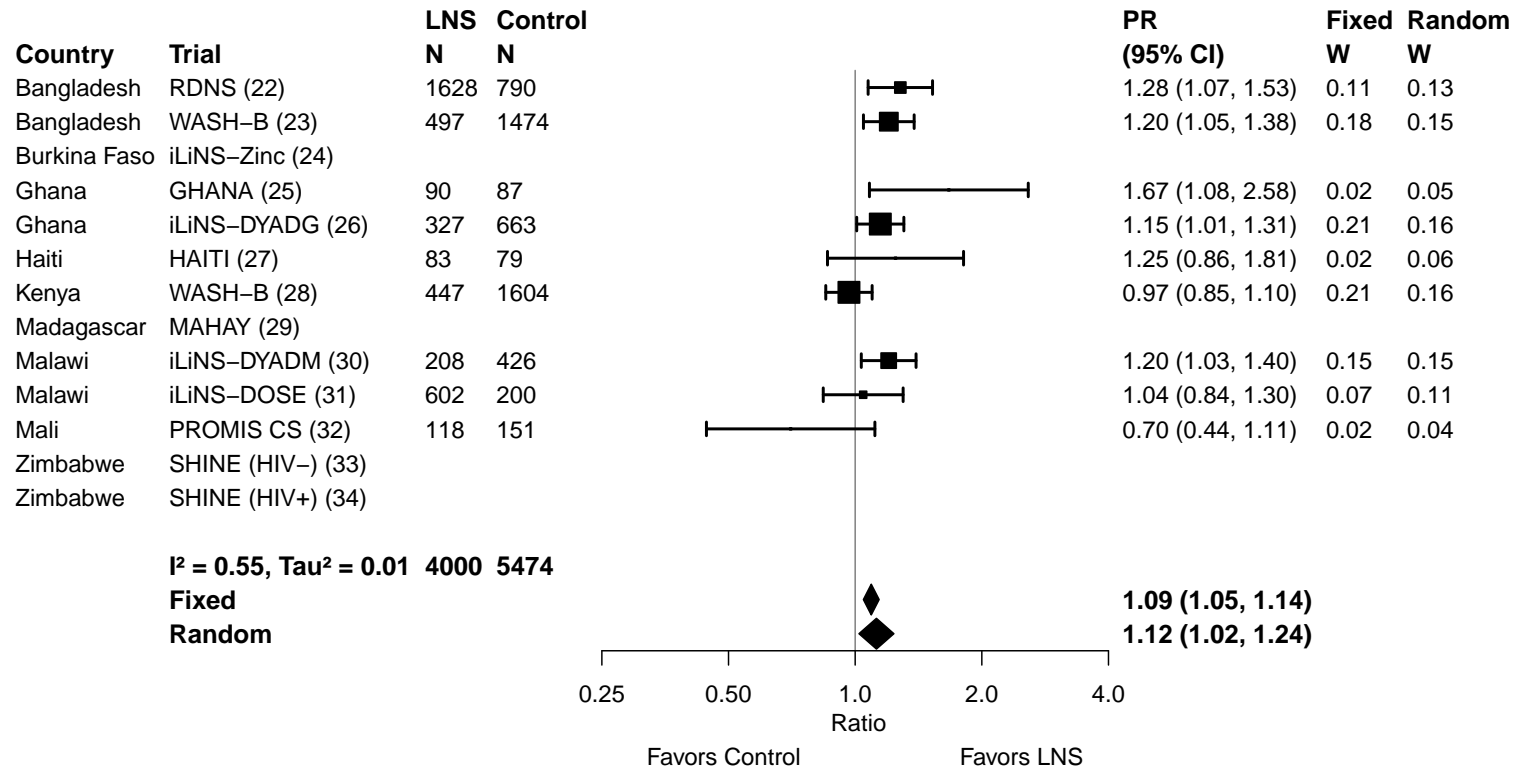

Supplemental figure 3P: 12-mo walking without support prevalence difference

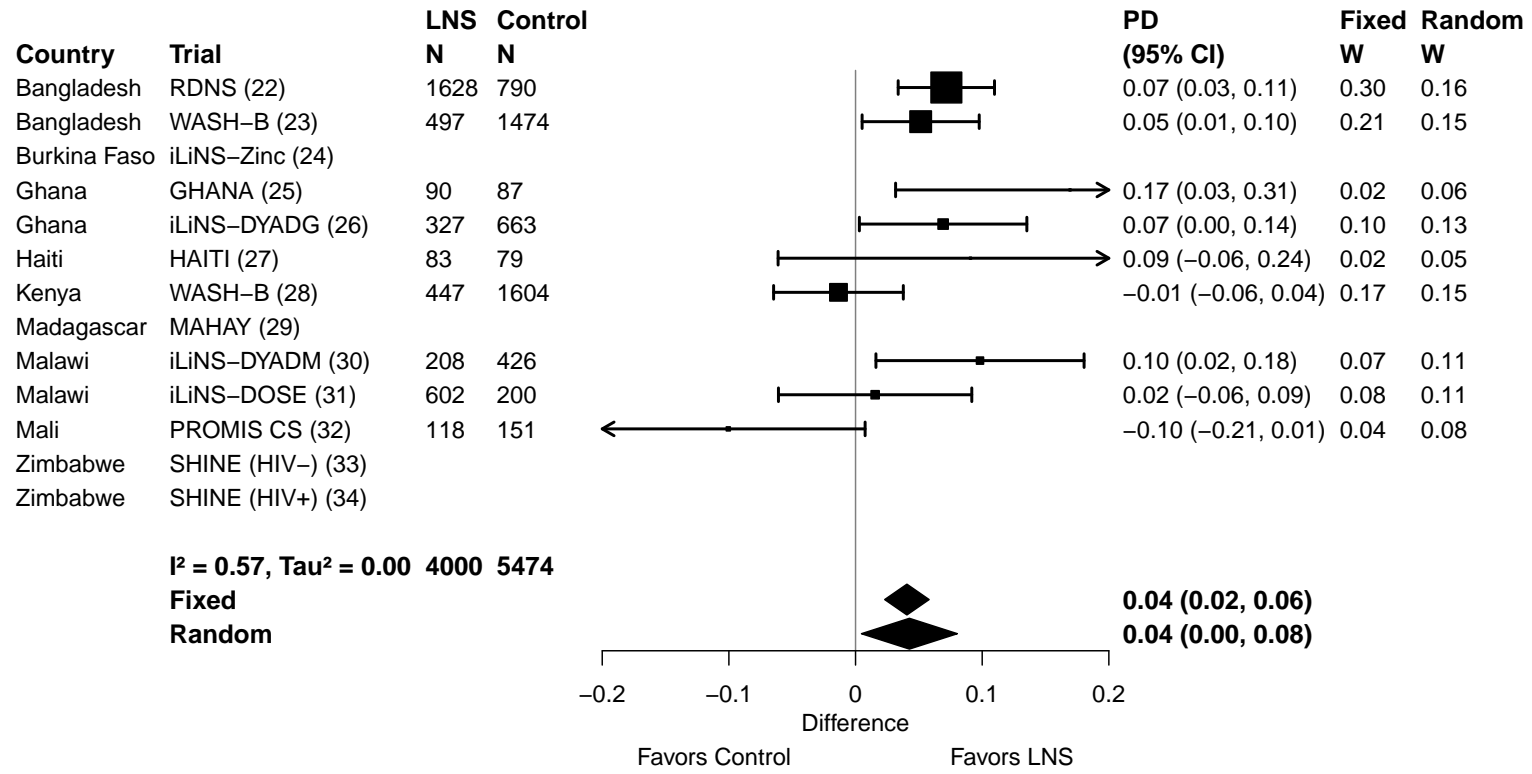

Supplemental figure 3Q: 12-mo walking with support prevalence ratio

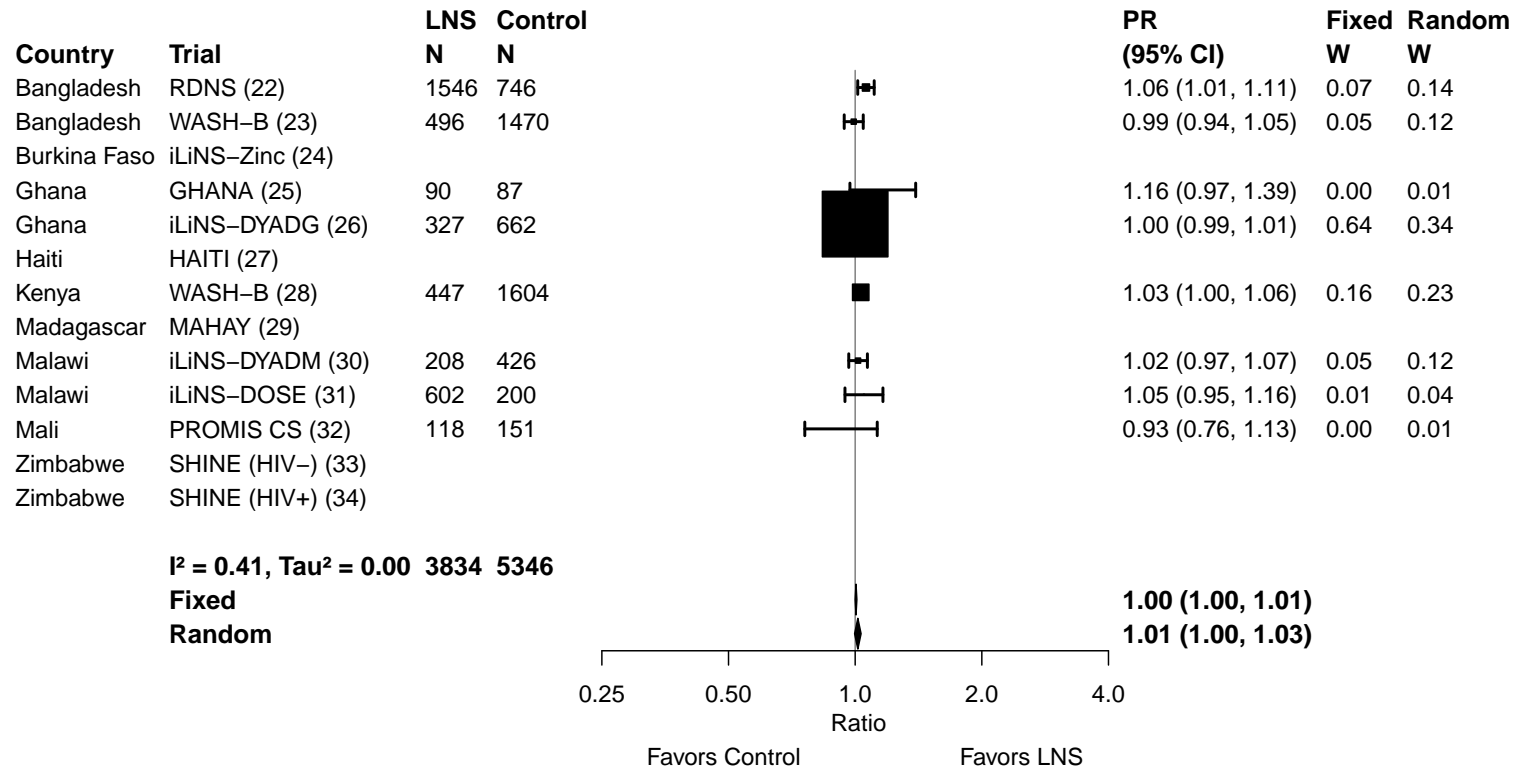

Supplemental figure 3R: 12-mo walking with support prevalence difference

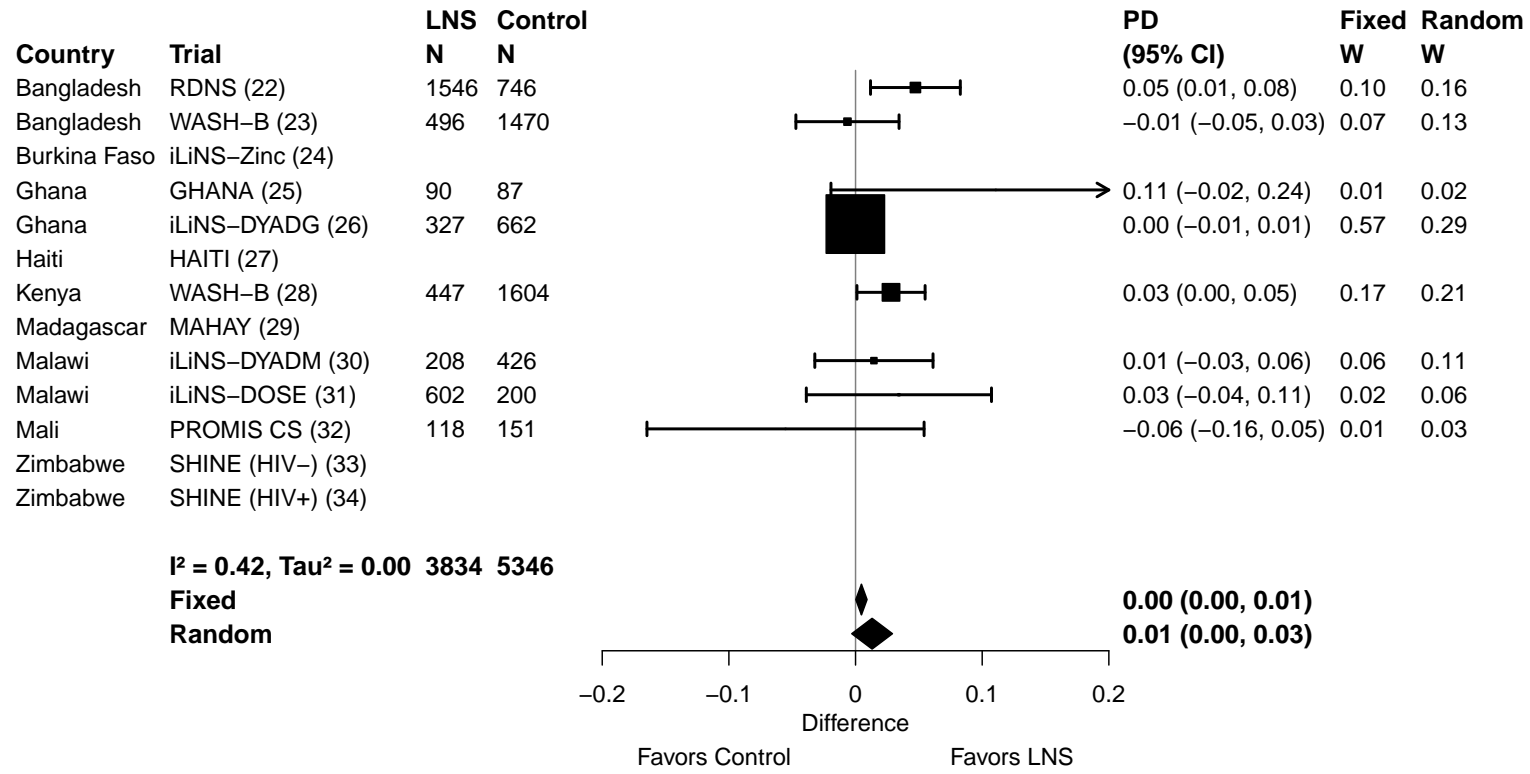

Supplemental figure 3S: 12-mo standing without support prevalence ratio

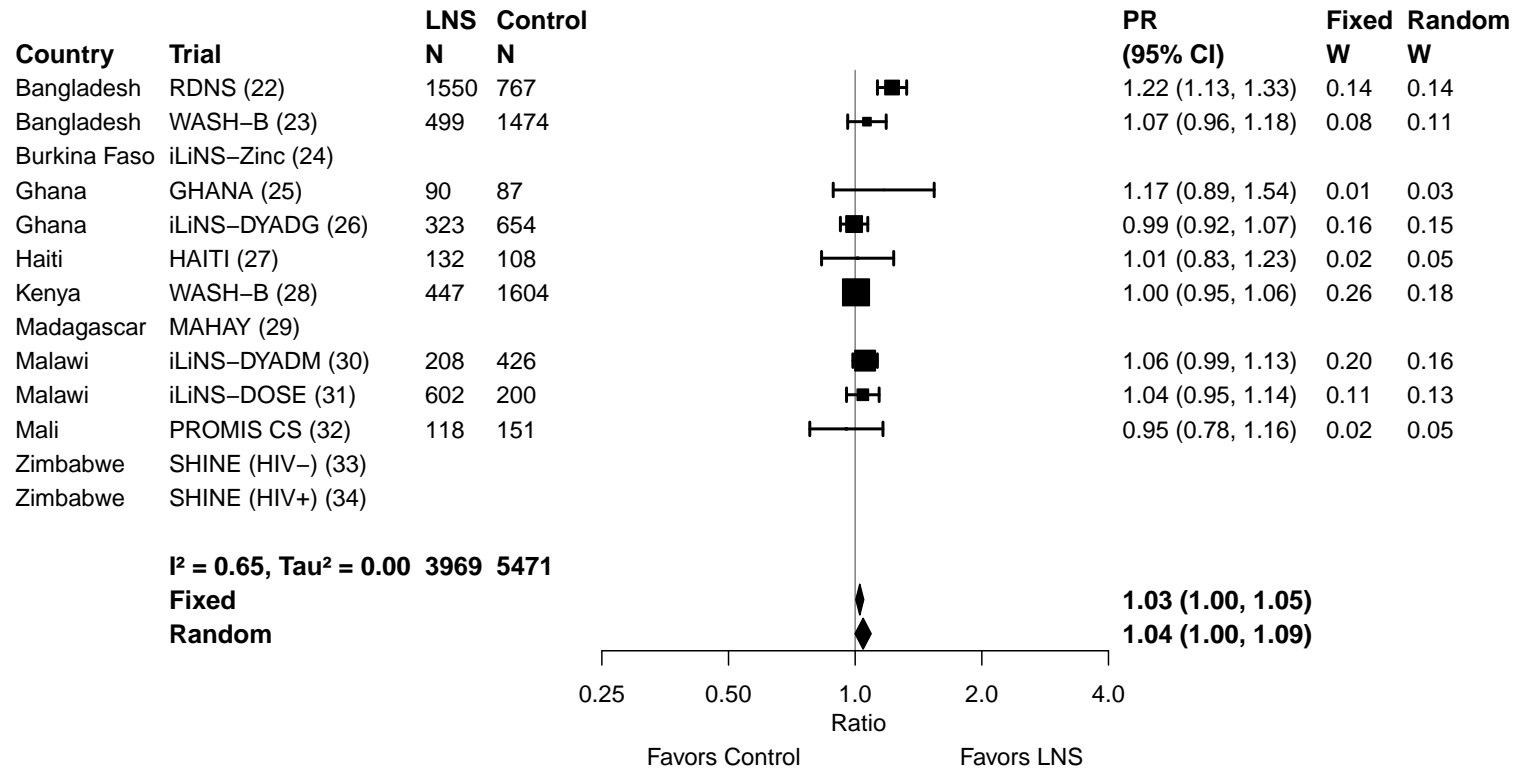

Supplemental figure 3T: 12-mo standing without support prevalence difference

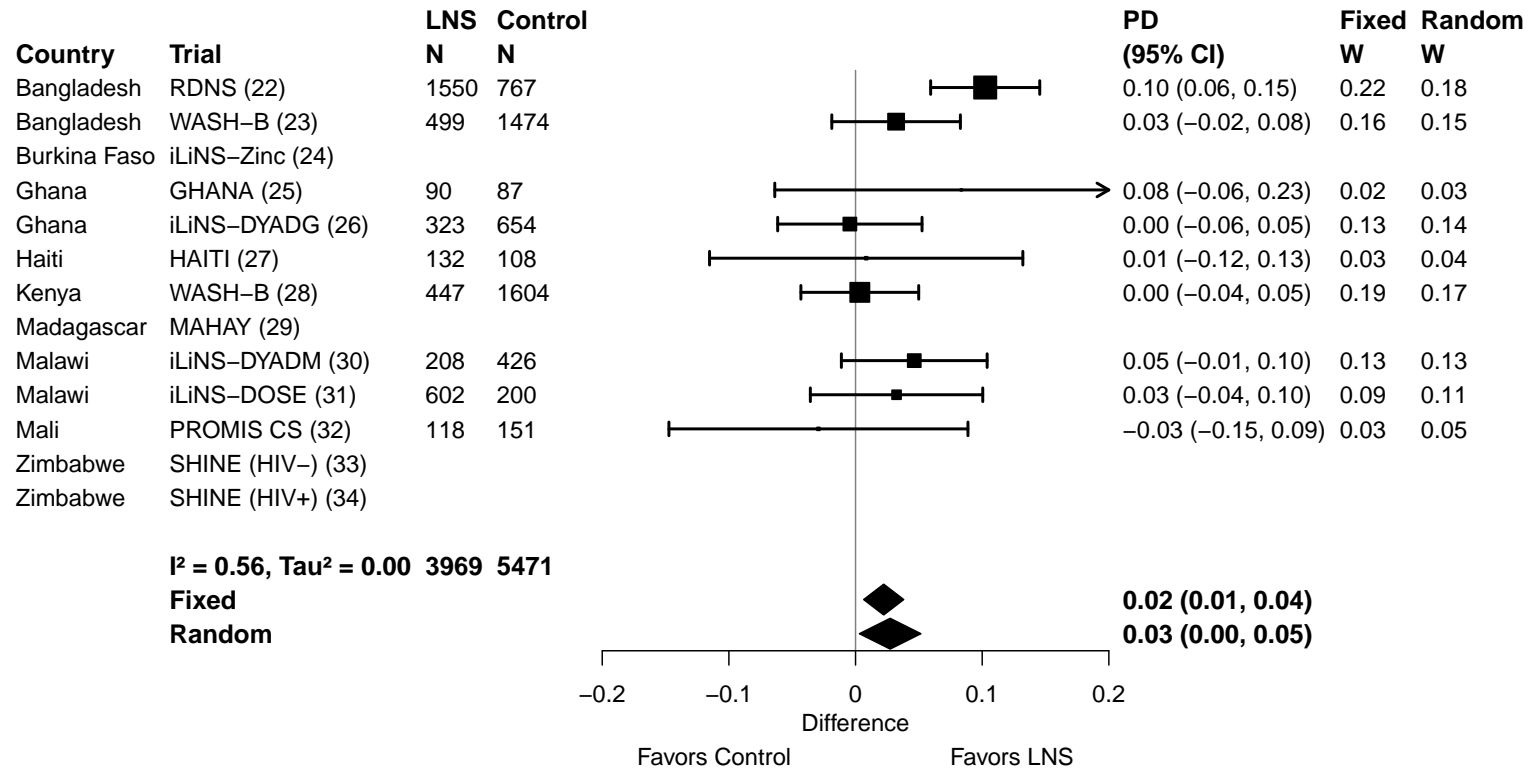

### Supplemental figure 3U: 12-mo standing with support prevalence ratio

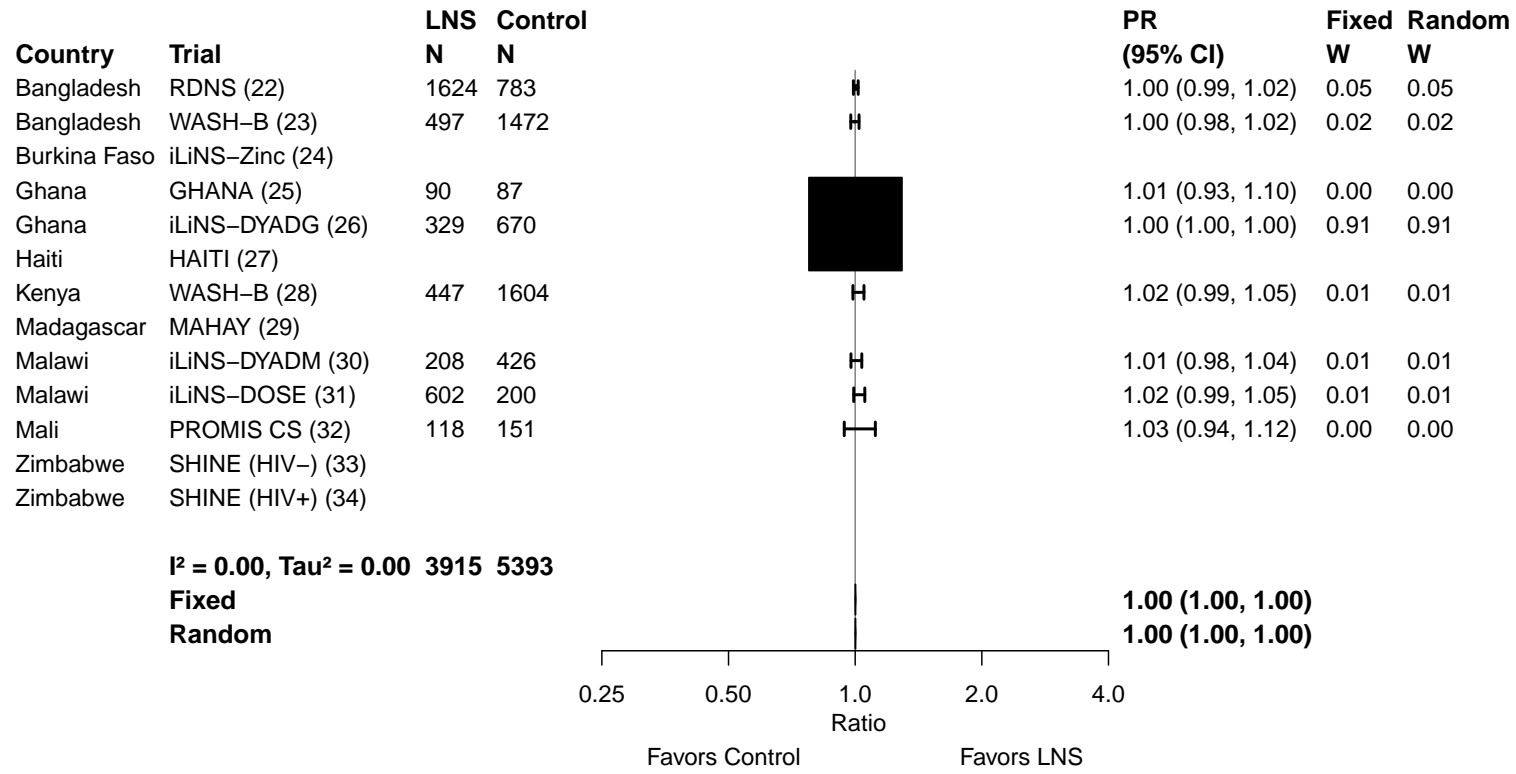



Supplemental figure 3V: 12-mo standing with support prevalence difference

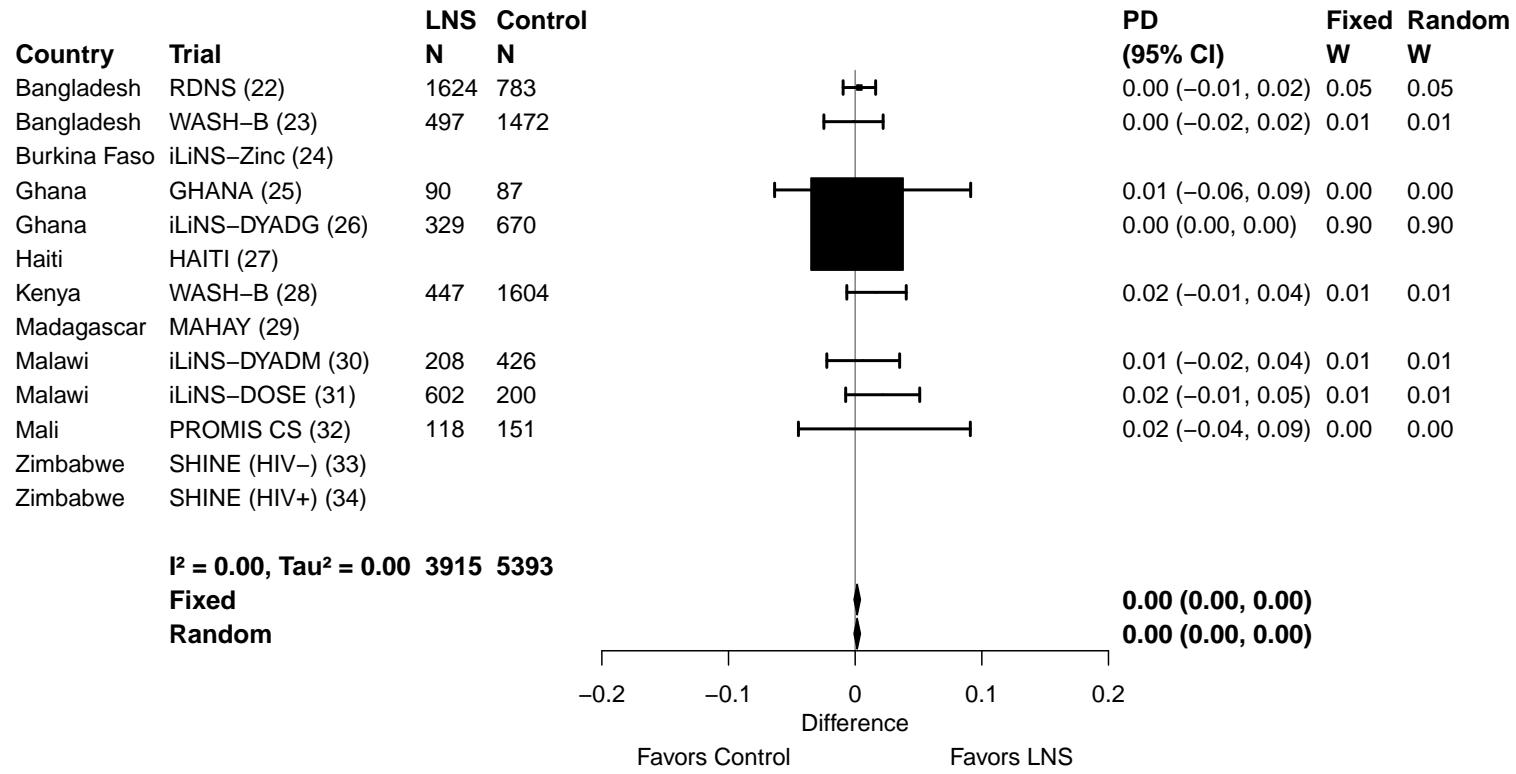

### Supplemental figure 3W: 12-mo crawling prevalence ratio

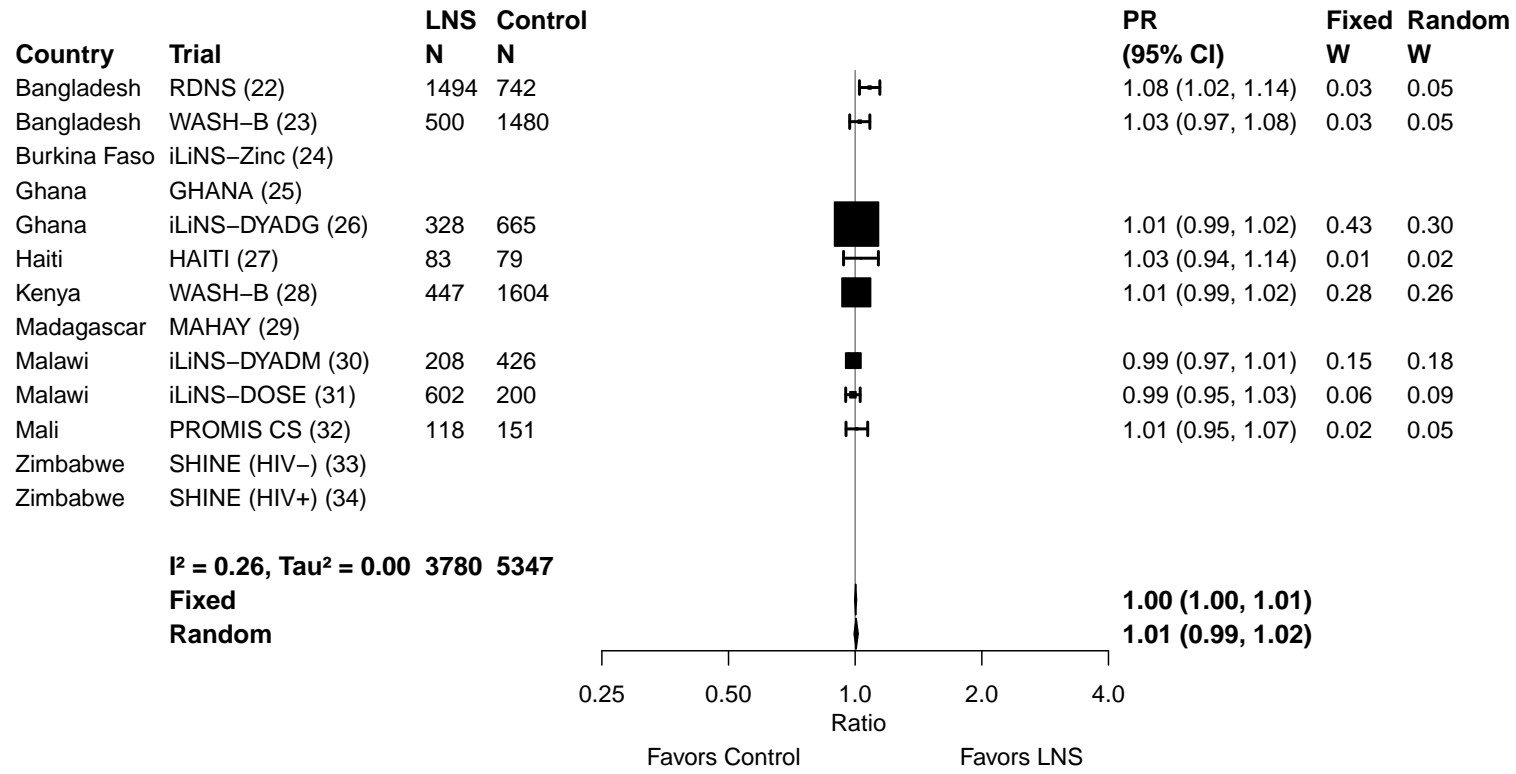

### Supplemental figure 3X: 12-mo crawling prevalence difference

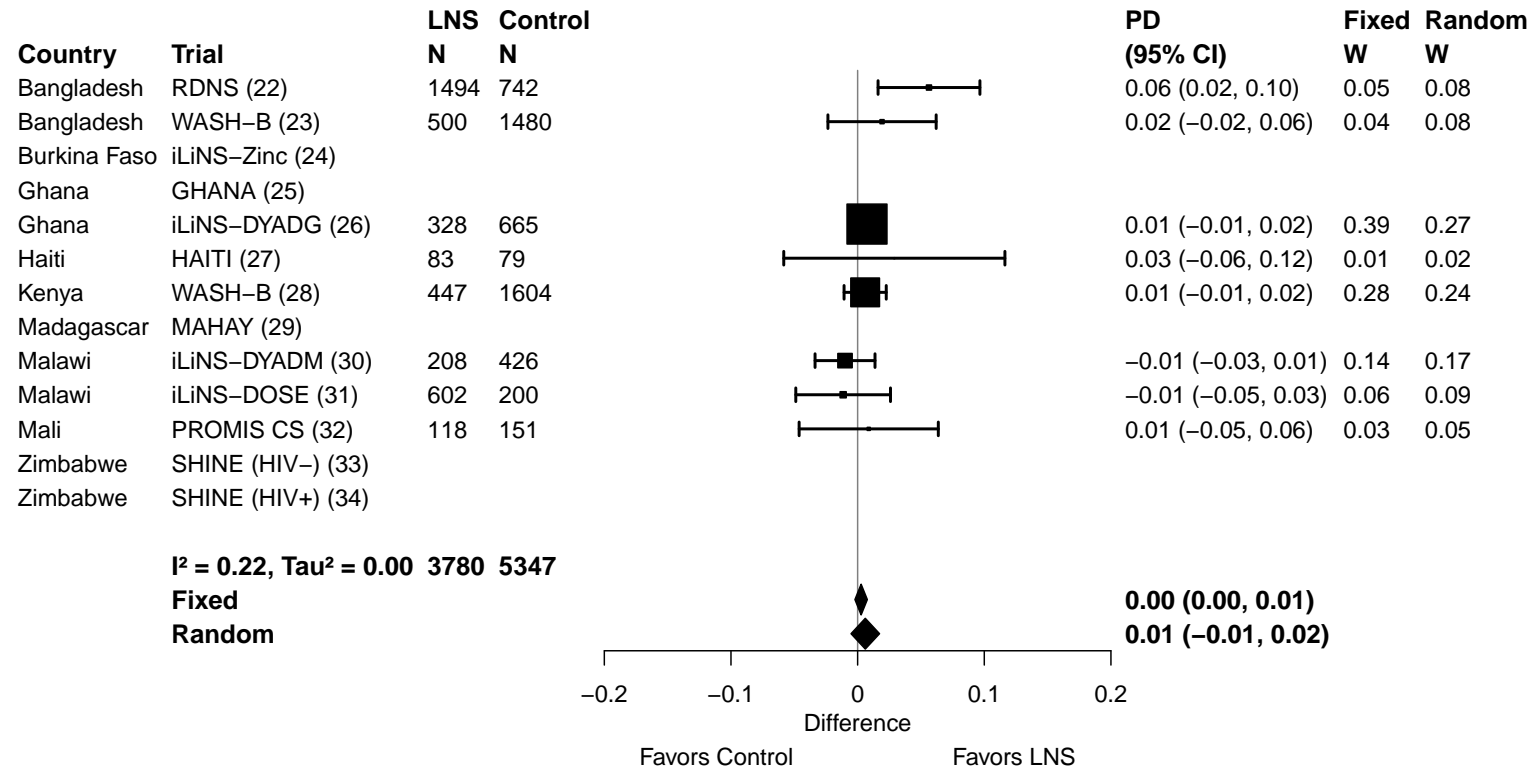

### Supplemental figure 3Y: 18-mo walking without support prevalence ratio

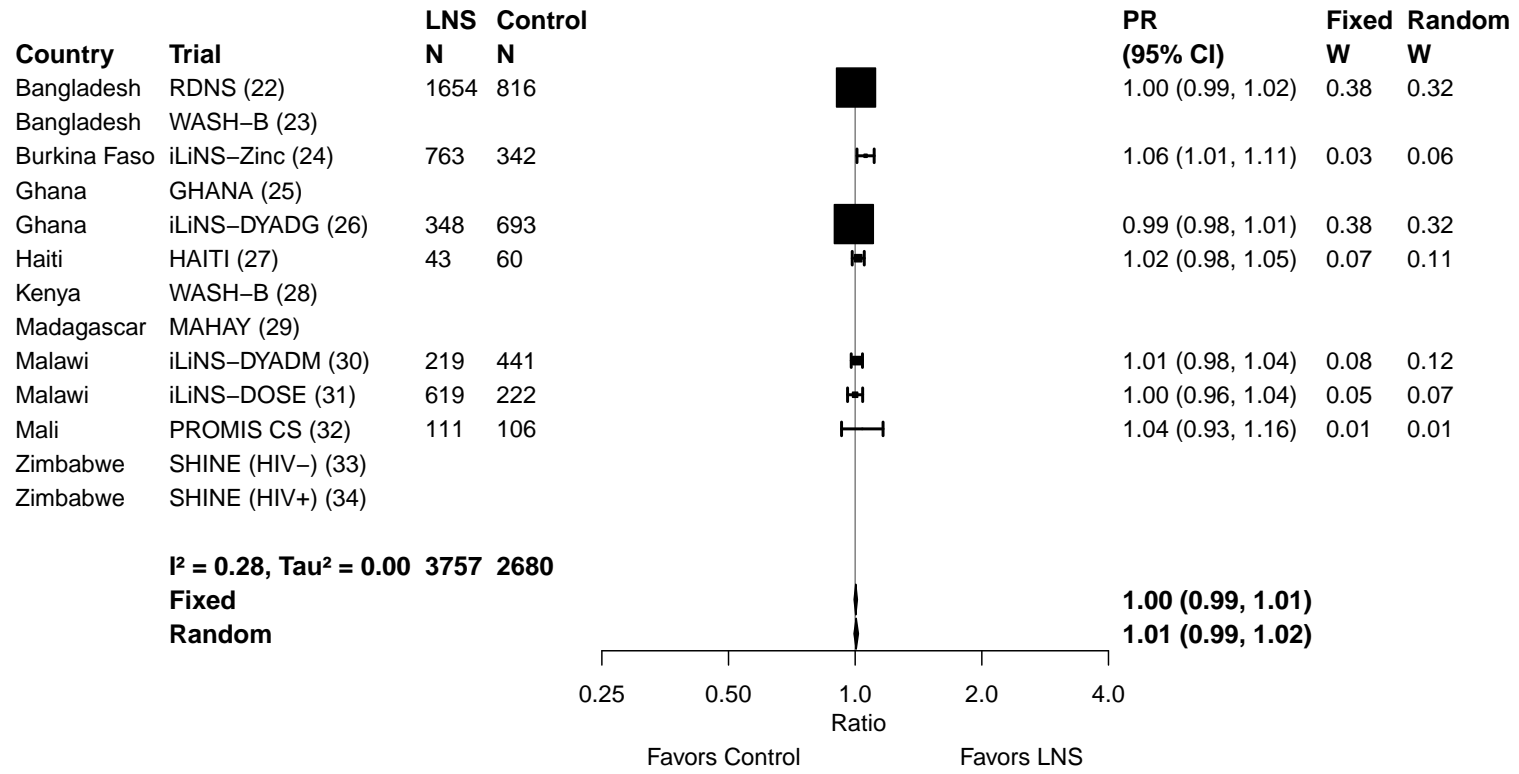

Supplemental figure 3Z: 18-mo walking without support prevalence difference

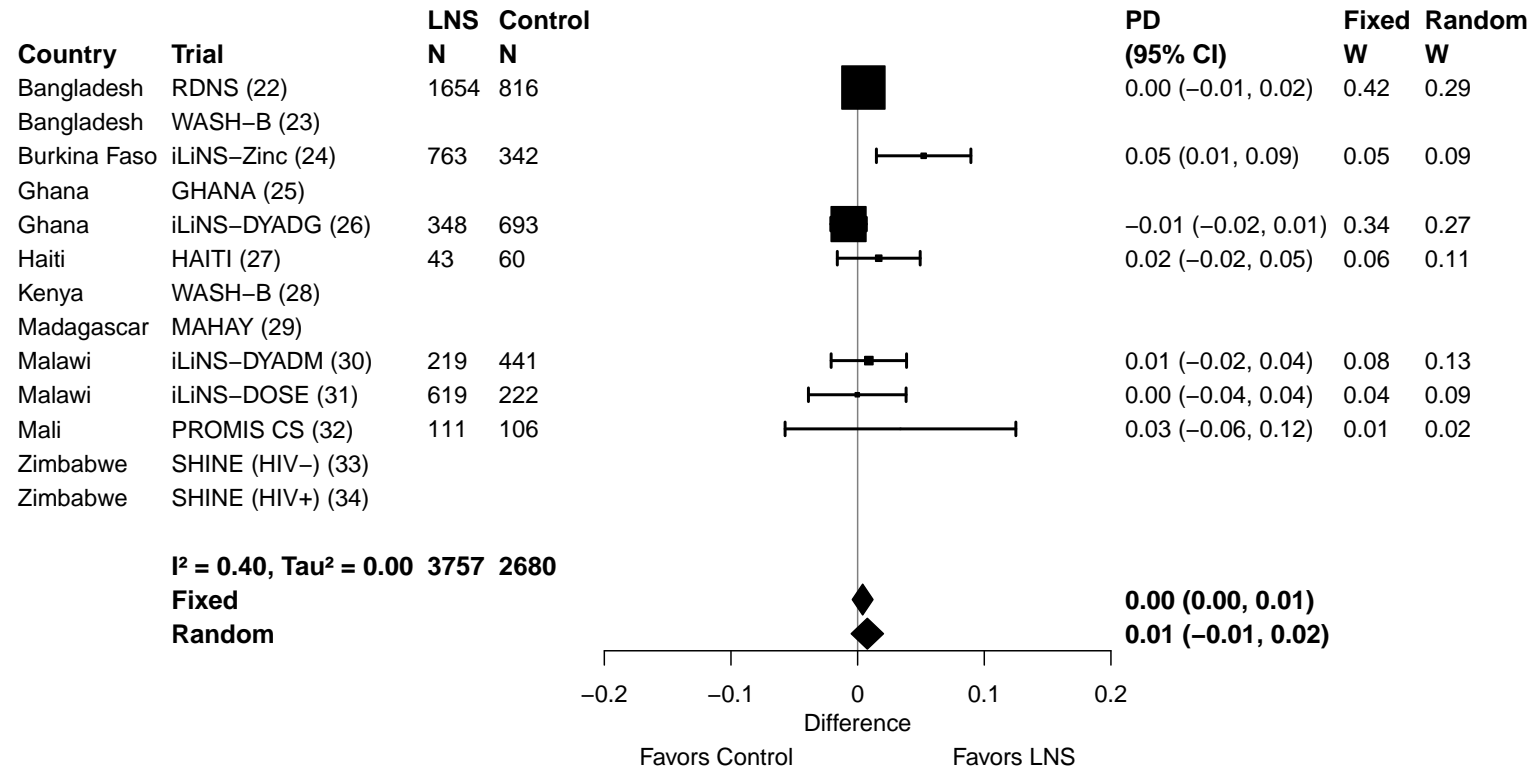

Supplemental figure 3AA: 18-mo walking with support prevalence ratio

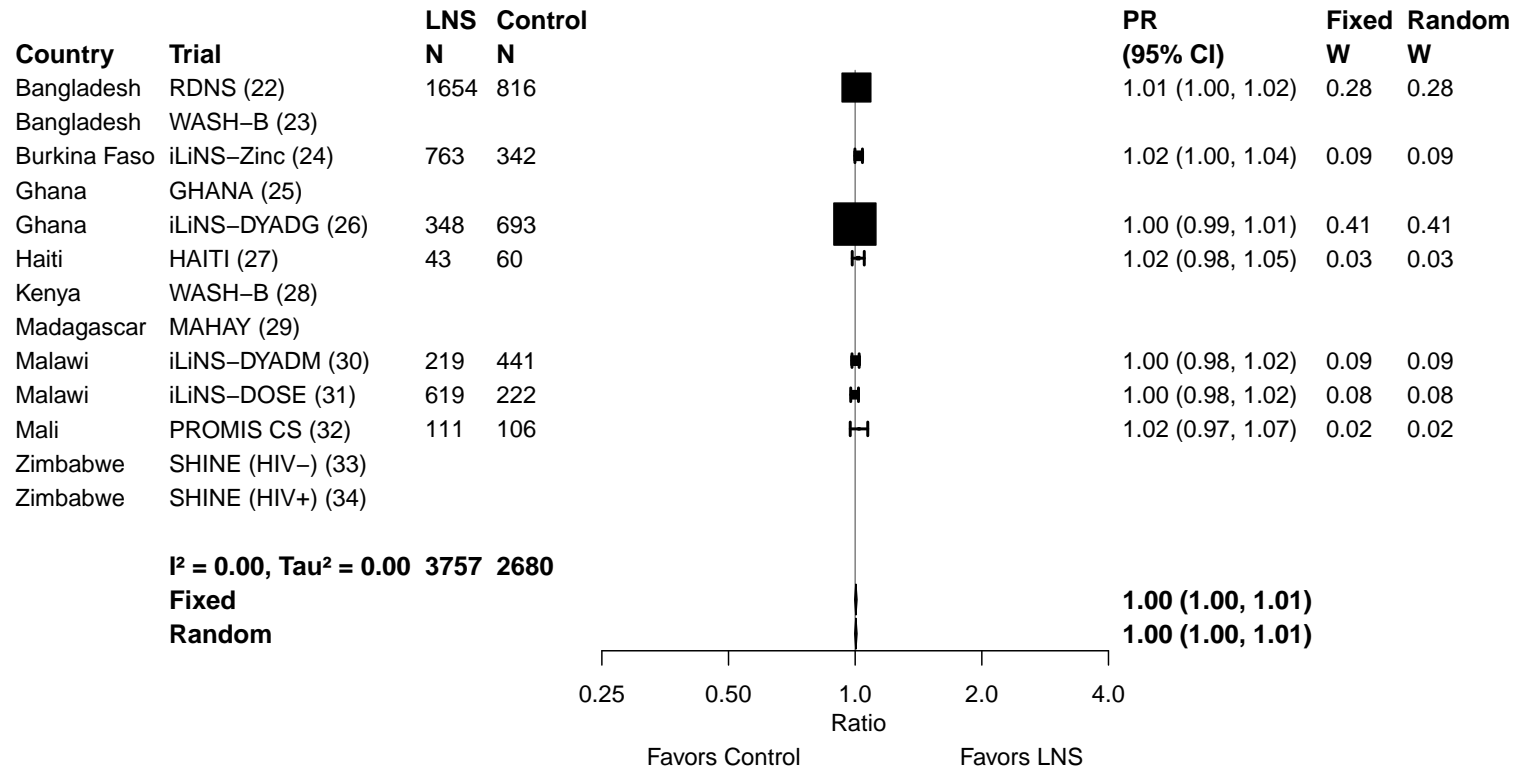

### Supplemental figure 3AB: 18-mo walking with support prevalence difference

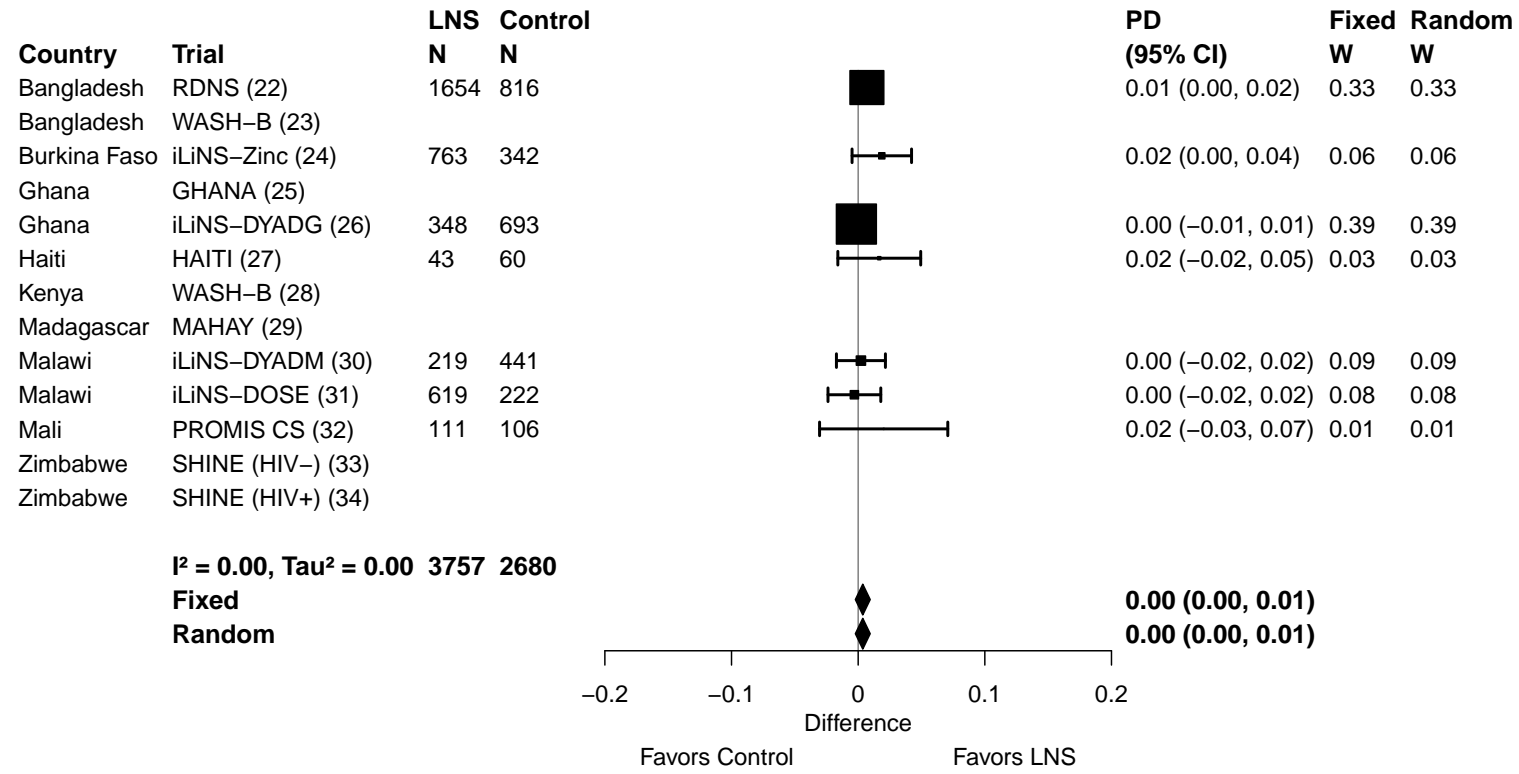

# Supplemental figure 4: Forest plots for effects of SQ-LNS on developmental outcomes stratified by study-level effect modifiers

## Contents

|                                                                             |           |
|-----------------------------------------------------------------------------|-----------|
| <b>Supplemental figure 4A: Mean difference in language z-score</b>          | <b>6</b>  |
| 4A1: Stratified by Geographic region . . . . .                              | 6         |
| 4A2: Stratified by Stunting burden . . . . .                                | 7         |
| 4A3: Stratified by Malaria prevalence . . . . .                             | 8         |
| 4A4: Stratified by Anemia prevalence . . . . .                              | 9         |
| 4A5: Stratified by Source water quality . . . . .                           | 10        |
| 4A6: Stratified by Sanitation . . . . .                                     | 11        |
| 4A7: Stratified by Supplement duration . . . . .                            | 12        |
| 4A8: Stratified by Frequency of contact . . . . .                           | 13        |
| 4A9: Stratified by Average SQ-LNS compliance . . . . .                      | 14        |
| <b>Supplemental figure 4B: Language lowest decile prevalence ratio</b>      | <b>15</b> |
| 4B1: Stratified by Geographic region . . . . .                              | 15        |
| 4B2: Stratified by Stunting burden . . . . .                                | 16        |
| 4B3: Stratified by Malaria prevalence . . . . .                             | 17        |
| 4B4: Stratified by Anemia prevalence . . . . .                              | 18        |
| 4B5: Stratified by Source water quality . . . . .                           | 19        |
| 4B6: Stratified by Sanitation . . . . .                                     | 20        |
| 4B7: Stratified by Supplement duration . . . . .                            | 21        |
| 4B8: Stratified by Frequency of contact . . . . .                           | 22        |
| 4B9: Stratified by Average SQ-LNS compliance . . . . .                      | 23        |
| <b>Supplemental figure 4C: Language lowest decile prevalence difference</b> | <b>24</b> |
| 4C1: Stratified by Geographic region . . . . .                              | 24        |
| 4C2: Stratified by Stunting burden . . . . .                                | 25        |
| 4C3: Stratified by Malaria prevalence . . . . .                             | 26        |
| 4C4: Stratified by Anemia prevalence . . . . .                              | 27        |
| 4C5: Stratified by Source water quality . . . . .                           | 28        |
| 4C6: Stratified by Sanitation . . . . .                                     | 29        |
| 4C7: Stratified by Supplement duration . . . . .                            | 30        |



|                                                                                     |           |
|-------------------------------------------------------------------------------------|-----------|
| 4C8: Stratified by Frequency of contact . . . . .                                   | 31        |
| 4C9: Stratified by Average SQ-LNS compliance . . . . .                              | 32        |
| <b>Supplemental figure 4D: Mean difference in social-emotional z-score</b>          | <b>33</b> |
| 4D1: Stratified by Geographic region (insufficient comparisons) . . . . .           | 33        |
| 4D2: Stratified by Stunting burden . . . . .                                        | 34        |
| 4D3: Stratified by Malaria prevalence . . . . .                                     | 35        |
| 4D4: Stratified by Anemia prevalence . . . . .                                      | 36        |
| 4D5: Stratified by Source water quality . . . . .                                   | 37        |
| 4D6: Stratified by Sanitation . . . . .                                             | 38        |
| 4D7: Stratified by Supplement duration . . . . .                                    | 39        |
| 4D8: Stratified by Frequency of contact . . . . .                                   | 40        |
| 4D9: Stratified by Average SQ-LNS compliance . . . . .                              | 41        |
| <b>Supplemental figure 4E: Social-emotional lowest decile prevalence ratio</b>      | <b>42</b> |
| 4E1: Stratified by Geographic region (insufficient comparisons) . . . . .           | 42        |
| 4E2: Stratified by Stunting burden . . . . .                                        | 43        |
| 4E3: Stratified by Malaria prevalence . . . . .                                     | 44        |
| 4E4: Stratified by Anemia prevalence . . . . .                                      | 45        |
| 4E5: Stratified by Source water quality . . . . .                                   | 46        |
| 4E6: Stratified by Sanitation . . . . .                                             | 47        |
| 4E7: Stratified by Supplement duration . . . . .                                    | 48        |
| 4E8: Stratified by Frequency of contact . . . . .                                   | 49        |
| 4E9: Stratified by Average SQ-LNS compliance . . . . .                              | 50        |
| <b>Supplemental figure 4F: Social-emotional lowest decile prevalence difference</b> | <b>51</b> |
| 4F1: Stratified by Geographic region (insufficient comparisons) . . . . .           | 51        |
| 4F2: Stratified by Stunting burden . . . . .                                        | 52        |
| 4F3: Stratified by Malaria prevalence . . . . .                                     | 53        |
| 4F4: Stratified by Anemia prevalence . . . . .                                      | 54        |
| 4F5: Stratified by Source water quality . . . . .                                   | 55        |
| 4F6: Stratified by Sanitation . . . . .                                             | 56        |
| 4F7: Stratified by Supplement duration . . . . .                                    | 57        |
| 4F8: Stratified by Frequency of contact . . . . .                                   | 58        |
| 4F9: Stratified by Average SQ-LNS compliance . . . . .                              | 59        |
| <b>Supplemental figure 4G: Mean difference in motor z-score</b>                     | <b>60</b> |
| 4G1: Stratified by Geographic region . . . . .                                      | 60        |
| 4G2: Stratified by Stunting burden . . . . .                                        | 61        |
| 4G3: Stratified by Malaria prevalence . . . . .                                     | 62        |
| 4G4: Stratified by Anemia prevalence . . . . .                                      | 63        |
| 4G5: Stratified by Source water quality . . . . .                                   | 64        |

|                                                                           |           |
|---------------------------------------------------------------------------|-----------|
| 4G6: Stratified by Sanitation . . . . .                                   | 65        |
| 4G7: Stratified by Supplement duration . . . . .                          | 66        |
| 4G8: Stratified by Frequency of contact . . . . .                         | 67        |
| 4G9: Stratified by Average SQ-LNS compliance . . . . .                    | 68        |
| <b>Supplemental figure 4H: Motor lowest decile prevalence ratio</b>       | <b>69</b> |
| 4H1: Stratified by Geographic region . . . . .                            | 69        |
| 4H2: Stratified by Stunting burden . . . . .                              | 70        |
| 4H3: Stratified by Malaria prevalence . . . . .                           | 71        |
| 4H4: Stratified by Anemia prevalence . . . . .                            | 72        |
| 4H5: Stratified by Source water quality . . . . .                         | 73        |
| 4H6: Stratified by Sanitation . . . . .                                   | 74        |
| 4H7: Stratified by Supplement duration . . . . .                          | 75        |
| 4H8: Stratified by Frequency of contact . . . . .                         | 76        |
| 4H9: Stratified by Average SQ-LNS compliance . . . . .                    | 77        |
| <b>Supplemental figure 4I: Motor lowest decile prevalence difference</b>  | <b>78</b> |
| 4I1: Stratified by Geographic region . . . . .                            | 78        |
| 4I2: Stratified by Stunting burden . . . . .                              | 79        |
| 4I3: Stratified by Malaria prevalence . . . . .                           | 80        |
| 4I4: Stratified by Anemia prevalence . . . . .                            | 81        |
| 4I5: Stratified by Source water quality . . . . .                         | 82        |
| 4I6: Stratified by Sanitation . . . . .                                   | 83        |
| 4I7: Stratified by Supplement duration . . . . .                          | 84        |
| 4I8: Stratified by Frequency of contact . . . . .                         | 85        |
| 4I9: Stratified by Average SQ-LNS compliance . . . . .                    | 86        |
| <b>Supplemental figure 4J: Mean difference in gross motor z-score</b>     | <b>87</b> |
| 4J1: Stratified by Geographic region . . . . .                            | 87        |
| 4J2: Stratified by Stunting burden . . . . .                              | 88        |
| 4J3: Stratified by Malaria prevalence . . . . .                           | 89        |
| 4J4: Stratified by Anemia prevalence . . . . .                            | 90        |
| 4J5: Stratified by Source water quality . . . . .                         | 91        |
| 4J6: Stratified by Sanitation . . . . .                                   | 92        |
| 4J7: Stratified by Supplement duration . . . . .                          | 93        |
| 4J8: Stratified by Frequency of contact . . . . .                         | 94        |
| 4J9: Stratified by Average SQ-LNS compliance . . . . .                    | 95        |
| <b>Supplemental figure 4K: Mean difference in fine motor z-score</b>      | <b>96</b> |
| 4K1: Stratified by Geographic region (insufficient comparisons) . . . . . | 96        |
| 4K2: Stratified by Stunting burden (insufficient comparisons) . . . . .   | 97        |
| 4K3: Stratified by Malaria prevalence . . . . .                           | 98        |

|                                                                                       |            |
|---------------------------------------------------------------------------------------|------------|
| 4K4: Stratified by Anemia prevalence . . . . .                                        | 99         |
| 4K5: Stratified by Source water quality . . . . .                                     | 100        |
| 4K6: Stratified by Sanitation . . . . .                                               | 101        |
| 4K7: Stratified by Supplement duration (insufficient comparisons) . . . . .           | 102        |
| 4K8: Stratified by Frequency of contact . . . . .                                     | 103        |
| 4K9: Stratified by Average SQ-LNS compliance (insufficient comparisons) . . . . .     | 104        |
| <b>Supplemental figure 4L: Mean difference in executive function z-score</b>          | <b>105</b> |
| 4L1: Stratified by Geographic region (insufficient comparisons) . . . . .             | 105        |
| 4L2: Stratified by Stunting burden (insufficient comparisons) . . . . .               | 106        |
| 4L3: Stratified by Malaria prevalence . . . . .                                       | 107        |
| 4L4: Stratified by Anemia prevalence (insufficient comparisons) . . . . .             | 108        |
| 4L5: Stratified by Source water quality (insufficient comparisons) . . . . .          | 109        |
| 4L6: Stratified by Sanitation . . . . .                                               | 110        |
| 4L7: Stratified by Supplement duration (insufficient comparisons) . . . . .           | 111        |
| 4L8: Stratified by Frequency of contact . . . . .                                     | 112        |
| 4L9: Stratified by Average SQ-LNS compliance (insufficient comparisons) . . . . .     | 113        |
| <b>Supplemental figure 4M: Executive function lowest decile prevalence ratio</b>      | <b>114</b> |
| 4M1: Stratified by Geographic region (insufficient comparisons) . . . . .             | 114        |
| 4M2: Stratified by Stunting burden (insufficient comparisons) . . . . .               | 115        |
| 4M3: Stratified by Malaria prevalence . . . . .                                       | 116        |
| 4M4: Stratified by Anemia prevalence (insufficient comparisons) . . . . .             | 117        |
| 4M5: Stratified by Source water quality (insufficient comparisons) . . . . .          | 118        |
| 4M6: Stratified by Sanitation . . . . .                                               | 119        |
| 4M7: Stratified by Supplement duration (insufficient comparisons) . . . . .           | 120        |
| 4M8: Stratified by Frequency of contact . . . . .                                     | 121        |
| 4M9: Stratified by Average SQ-LNS compliance (insufficient comparisons) . . . . .     | 122        |
| <b>Supplemental figure 4N: Executive function lowest decile prevalence difference</b> | <b>123</b> |
| 4N1: Stratified by Geographic region (insufficient comparisons) . . . . .             | 123        |
| 4N2: Stratified by Stunting burden (insufficient comparisons) . . . . .               | 124        |
| 4N3: Stratified by Malaria prevalence . . . . .                                       | 125        |
| 4N4: Stratified by Anemia prevalence (insufficient comparisons) . . . . .             | 126        |
| 4N5: Stratified by Source water quality (insufficient comparisons) . . . . .          | 127        |
| 4N6: Stratified by Sanitation . . . . .                                               | 128        |
| 4N7: Stratified by Supplement duration (insufficient comparisons) . . . . .           | 129        |
| 4N8: Stratified by Frequency of contact . . . . .                                     | 130        |
| 4N9: Stratified by Average SQ-LNS compliance (insufficient comparisons) . . . . .     | 131        |
| <b>Supplemental figure 4O: 12-mo walking without support prevalence ratio</b>         | <b>132</b> |
| 4O1: Stratified by Geographic region . . . . .                                        | 132        |

|                                                                                    |            |
|------------------------------------------------------------------------------------|------------|
| 4O2: Stratified by Stunting burden . . . . .                                       | 133        |
| 4O3: Stratified by Malaria prevalence . . . . .                                    | 134        |
| 4O4: Stratified by Anemia prevalence . . . . .                                     | 135        |
| 4O5: Stratified by Source water quality (insufficient comparisons) . . . . .       | 136        |
| 4O6: Stratified by Sanitation . . . . .                                            | 137        |
| 4O7: Stratified by Supplement duration . . . . .                                   | 138        |
| 4O8: Stratified by Frequency of contact . . . . .                                  | 139        |
| 4O9: Stratified by Average SQ-LNS compliance . . . . .                             | 140        |
| <b>Supplemental figure 4P: 12-mo walking without support prevalence difference</b> | <b>141</b> |
| 4P1: Stratified by Geographic region . . . . .                                     | 141        |
| 4P2: Stratified by Stunting burden . . . . .                                       | 142        |
| 4P3: Stratified by Malaria prevalence . . . . .                                    | 143        |
| 4P4: Stratified by Anemia prevalence . . . . .                                     | 144        |
| 4P5: Stratified by Source water quality (insufficient comparisons) . . . . .       | 145        |
| 4P6: Stratified by Sanitation . . . . .                                            | 146        |
| 4P7: Stratified by Supplement duration . . . . .                                   | 147        |
| 4P8: Stratified by Frequency of contact . . . . .                                  | 148        |
| 4P9: Stratified by Average SQ-LNS compliance . . . . .                             | 149        |

These figures are forest plots showing the study-level effect modification of intervention effects. Each figure shows the study-level estimates along with the corresponding pooled estimate grouped by study-level effect modifier category. For dichotomous outcomes analyzed via prevalence ratios, the effect estimate is the prevalence in the LNS group divided by the prevalence in the control group. For dichotomous outcomes analyzed via prevalence differences, the effect estimate is the prevalence in the LNS group minus the prevalence in the control group. The labels on the left y-axis correspond to trial level information. The values on the right indicate the study level effect estimate, confidence interval, and weighting for deriving the pooled estimates.

Motor milestone figures show individual trial estimates excluding the JiVitA-4 data because those individual trial results have not yet been published. The pooled estimate in each figure includes the JiVitA-4 data, for consistency with all other analyses.

Figures showing individual trial estimates for the SHINE trial are split by comparison to reflect the cross-over design. For calculating the pooled estimates shown in these figures, the trial is analyzed with LNS intervention arms combined and non-LNS intervention arms combined. Except for when sanitation or water quality are the effect modifier then the LNS +WSH vs WSH comparison is excluded.

## Supplemental figure 4A: Mean difference in language z-score

### 4A1: Stratified by Geographic region

#### Geographic region

(p-diff = 0.978)

#### Geographic region – SEAR

| Country    | Trial         | Tool     | N           | N           |
|------------|---------------|----------|-------------|-------------|
| Bangladesh | JiVitA-4 (21) | BSID-III | 445         | 143         |
| Bangladesh | RDNS (22)     | CDI      | 1663        | 814         |
| Bangladesh | WASH-B (23)   | CDI      | 1109        | 3353        |
|            |               |          | <b>3217</b> | <b>4310</b> |

$I^2 = 0.58, \text{Tau}^2 = 0.01$

#### Geographic region – AFR

|              |                                            |      |             |             |
|--------------|--------------------------------------------|------|-------------|-------------|
| Burkina Faso | iLiNS-Zinc (24)                            | DMC  | 746         | 375         |
| Ghana        | GHANA (25)                                 |      |             |             |
| Ghana        | iLiNS-DYADG (26)                           | CDI  | 331         | 658         |
| Kenya        | WASH-B (28)                                | EASQ | 1362        | 4745        |
| Madagascar   | MAHAY (29)                                 | ASQI | 1613        | 1604        |
| Malawi       | iLiNS-DYADM (30)                           | CDI  | 215         | 439         |
| Malawi       | iLiNS-DOSE (31)                            | CDI  | 645         | 221         |
| Mali         | PROMIS CS (32)                             | DMC  | 927         | 944         |
| Zimbabwe     | SHINE <sup>1</sup> (HIV-) (33), LNS vs SOC | CDI  | 381         | 373         |
| Zimbabwe     | LNS+WSH vs WSH                             | CDI  | 436         | 408         |
| Zimbabwe     | SHINE <sup>1</sup> (HIV+) (34), LNS vs SOC | CDI  | 66          | 68          |
| Zimbabwe     | LNS+WSH vs WSH                             | CDI  | 99          | 79          |
|              |                                            |      | <b>6821</b> | <b>9914</b> |

$I^2 = 0.66, \text{Tau}^2 = 0.01$

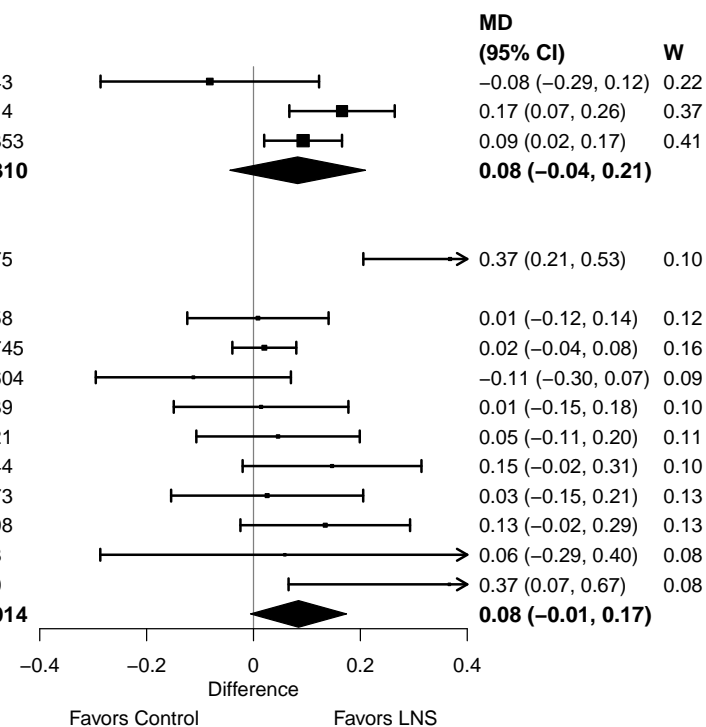

Supplemental figure 4A: Mean difference in language z-score

4A2: Stratified by Stunting burden

**Stunting burden**  
(p-diff = 0.077)

**Stunting burden – Less than 35%**

| Country | Trial            | Tool         | N           | N           | MD (95% CI)               | W    |
|---------|------------------|--------------|-------------|-------------|---------------------------|------|
| Ghana   | GHANA (25)       |              |             |             |                           |      |
| Ghana   | iLiNS-DYADG (26) | CDI          | 331         | 658         | 0.01 (-0.12, 0.14)        | 0.26 |
| Haiti   | HAITI (27)       | Total sounds | 150         | 149         | -0.13 (-0.35, 0.10)       | 0.17 |
| Kenya   | WASH-B (28)      | EASQ         | 1362        | 4745        | 0.02 (-0.04, 0.08)        | 0.34 |
| Malawi  | iLiNS-DYADM (30) | CDI          | 215         | 439         | 0.01 (-0.15, 0.18)        | 0.23 |
|         |                  |              | <b>2058</b> | <b>5991</b> | <b>0.01 (-0.04, 0.06)</b> |      |

**Stunting burden – More than 35%**

|              |                                            |          |             |             |                          |      |
|--------------|--------------------------------------------|----------|-------------|-------------|--------------------------|------|
| Bangladesh   | JiVitA-4 (21)                              | BSID-III | 445         | 143         | -0.08 (-0.29, 0.12)      | 0.09 |
| Bangladesh   | RDNS (22)                                  | CDI      | 1663        | 814         | 0.17 (0.07, 0.26)        | 0.14 |
| Bangladesh   | WASH-B (23)                                | CDI      | 1109        | 3353        | 0.09 (0.02, 0.17)        | 0.15 |
| Burkina Faso | iLiNS-Zinc (24)                            | DMC      | 746         | 375         | 0.37 (0.21, 0.53)        | 0.11 |
| Madagascar   | MAHAY (29)                                 | ASQI     | 1613        | 1604        | -0.11 (-0.30, 0.07)      | 0.10 |
| Malawi       | iLiNS-DOSE (31)                            | CDI      | 645         | 221         | 0.05 (-0.11, 0.20)       | 0.11 |
| Mali         | PROMIS CS (32)                             | DMC      | 927         | 944         | 0.15 (-0.02, 0.31)       | 0.10 |
| Zimbabwe     | SHINE <sup>1</sup> (HIV-) (33), LNS vs SOC | CDI      | 381         | 373         | 0.03 (-0.15, 0.21)       | 0.13 |
| Zimbabwe     | LNS+WSH vs WSH                             | CDI      | 436         | 408         | 0.13 (-0.02, 0.29)       | 0.13 |
| Zimbabwe     | SHINE <sup>1</sup> (HIV+) (34), LNS vs SOC | CDI      | 66          | 68          | 0.06 (-0.29, 0.40)       | 0.08 |
| Zimbabwe     | LNS+WSH vs WSH                             | CDI      | 99          | 79          | 0.37 (0.07, 0.67)        | 0.08 |
|              |                                            |          | <b>8130</b> | <b>8382</b> | <b>0.11 (0.02, 0.20)</b> |      |

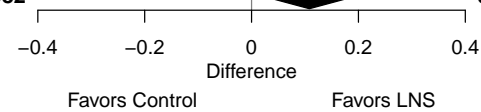

Supplemental figure 4A: Mean difference in language z-score

4A3: Stratified by Malaria prevalence

**Malaria prevalence**

( $p$ -diff = 0.365)

**Malaria prevalence – Less than 10%**

| Country    | Trial                                      | Tool         | N           | N            |
|------------|--------------------------------------------|--------------|-------------|--------------|
| Bangladesh | JiVitA-4 (21)                              | BSID-III     | 445         | 143          |
| Bangladesh | RDNS (22)                                  | CDI          | 1663        | 814          |
| Bangladesh | WASH-B (23)                                | CDI          | 1109        | 3353         |
| Haiti      | HAITI (27)                                 | Total sounds | 150         | 149          |
| Kenya      | WASH-B (28)                                | EASQ         | 1362        | 4745         |
| Madagascar | MAHAY (29)                                 | ASQI         | 1613        | 1604         |
| Zimbabwe   | SHINE <sup>1</sup> (HIV-) (33), LNS vs SOC | CDI          | 381         | 373          |
| Zimbabwe   | LNS+WSH vs WSH                             | CDI          | 436         | 408          |
| Zimbabwe   | SHINE <sup>1</sup> (HIV+) (34), LNS vs SOC | CDI          | 66          | 68           |
| Zimbabwe   | LNS+WSH vs WSH                             | CDI          | 99          | 79           |
|            |                                            |              | <b>7324</b> | <b>11736</b> |

$I^2 = 0.60$ ,  $Tau^2 = 0.01$

**Malaria prevalence – At least 10%**

|              |                  |     |             |             |
|--------------|------------------|-----|-------------|-------------|
| Burkina Faso | iLiNS-Zinc (24)  | DMC | 746         | 375         |
| Ghana        | GHANA (25)       |     |             |             |
| Ghana        | iLiNS-DYADG (26) | CDI | 331         | 658         |
| Malawi       | iLiNS-DYADM (30) | CDI | 215         | 439         |
| Malawi       | iLiNS-DOSE (31)  | CDI | 645         | 221         |
| Mali         | PROMIS CS (32)   | DMC | 927         | 944         |
|              |                  |     | <b>2864</b> | <b>2637</b> |

$I^2 = 0.72$ ,  $Tau^2 = 0.02$

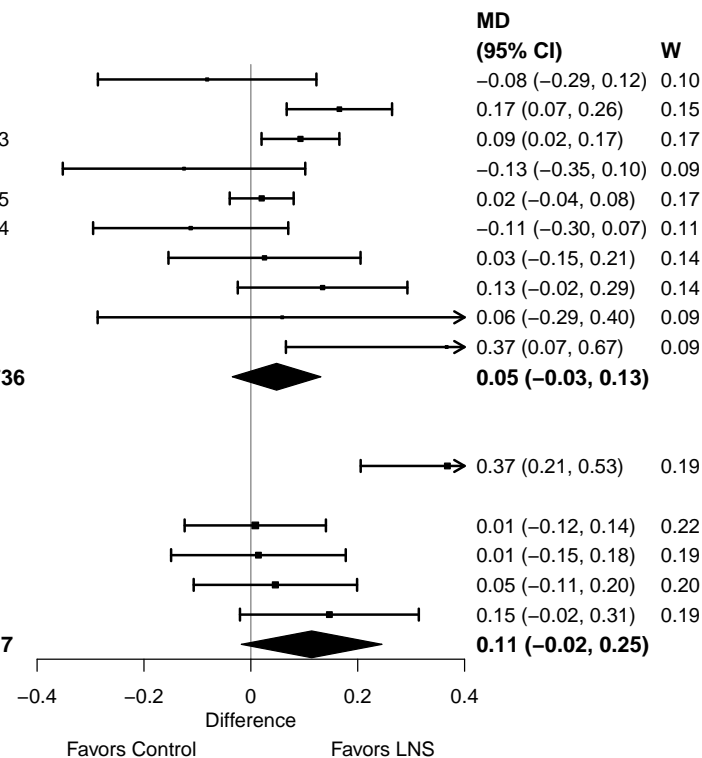

Supplemental figure 4A: Mean difference in language z-score

4A4: Stratified by Anemia prevalence

**Anemia prevalence**  
(p-diff = 0.530)

**Anemia prevalence – High**

| Country      | Trial            | Tool         | N           | N           |
|--------------|------------------|--------------|-------------|-------------|
| Burkina Faso | iLiNS-Zinc (24)  | DMC          | 746         | 375         |
| Ghana        | GHANA (25)       |              |             |             |
| Haiti        | HAITI (27)       | Total sounds | 150         | 149         |
| Malawi       | iLiNS-DYADM (30) | CDI          | 215         | 439         |
| Malawi       | iLiNS-DOSE (31)  | CDI          | 645         | 221         |
| Mali         | PROMIS CS (32)   | DMC          | 927         | 944         |
|              |                  |              | <b>2683</b> | <b>2128</b> |

**I<sup>2</sup> = 0.75, Tau<sup>2</sup> = 0.02**

**Anemia prevalence – Moderate**

|            |                                            |          |             |              |
|------------|--------------------------------------------|----------|-------------|--------------|
| Bangladesh | JiVitA-4 (21)                              | BSID-III | 445         | 143          |
| Bangladesh | RDNS (22)                                  | CDI      | 1663        | 814          |
| Bangladesh | WASH-B (23)                                | CDI      | 1109        | 3353         |
| Ghana      | iLiNS-DYADG (26)                           | CDI      | 331         | 658          |
| Kenya      | WASH-B (28)                                | EASQ     | 1362        | 4745         |
| Madagascar | MAHAY (29)                                 | ASQI     | 1613        | 1604         |
| Zimbabwe   | SHINE <sup>1</sup> (HIV-) (33), LNS vs SOC | CDI      | 381         | 373          |
| Zimbabwe   | LNS+WSH vs WSH                             | CDI      | 436         | 408          |
| Zimbabwe   | SHINE <sup>1</sup> (HIV+) (34), LNS vs SOC | CDI      | 66          | 68           |
| Zimbabwe   | LNS+WSH vs WSH                             | CDI      | 99          | 79           |
|            |                                            |          | <b>7505</b> | <b>12245</b> |

**I<sup>2</sup> = 0.55, Tau<sup>2</sup> = 0.01**

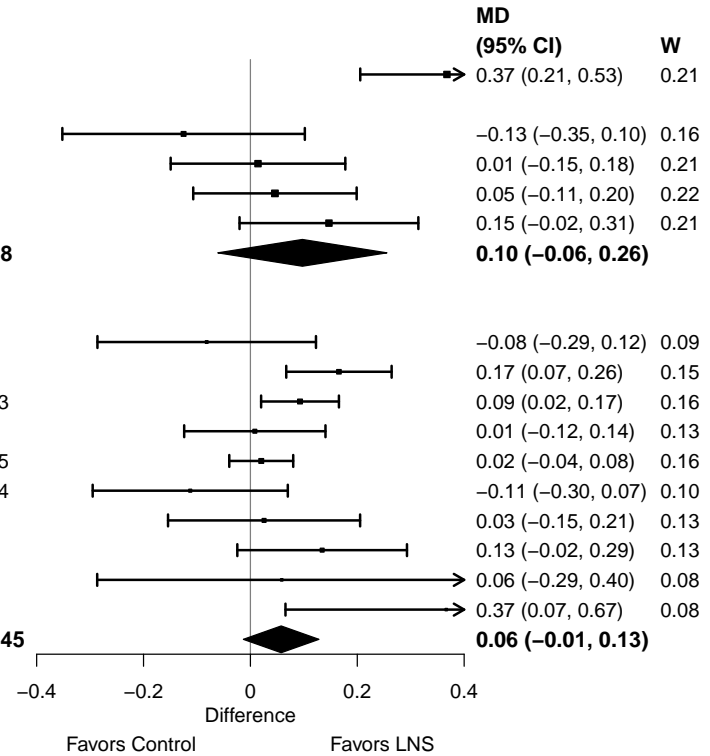



Supplemental figure 4A: Mean difference in language z-score

4A5: Stratified by Source water quality

**Source water quality**  
(p-diff = 0.536)

**Source water quality – Improved**

| Country    | Trial            | Tool         | N           | N           |
|------------|------------------|--------------|-------------|-------------|
| Bangladesh | JiVitA-4 (21)    | BSID-III     | 445         | 143         |
| Bangladesh | RDNS (22)        | CDI          | 1663        | 814         |
| Bangladesh | WASH-B (23)      | CDI          | 548         | 1099        |
| Ghana      | GHANA (25)       |              |             |             |
| Ghana      | iLiNS-DYADG (26) | CDI          | 331         | 658         |
| Haiti      | HAITI (27)       | Total sounds | 150         | 149         |
| Malawi     | iLiNS-DYADM (30) | CDI          | 215         | 439         |
| Malawi     | iLiNS-DOSE (31)  | CDI          | 645         | 221         |
|            |                  |              | <b>3997</b> | <b>3523</b> |

**I<sup>2</sup> = 0.54, Tau<sup>2</sup> = 0.01**

**Source water quality – Unimproved**

|              |                   |      |             |             |
|--------------|-------------------|------|-------------|-------------|
| Burkina Faso | iLiNS-Zinc (24)   | DMC  | 746         | 375         |
| Kenya        | WASH-B (28)       | EASQ | 649         | 2073        |
| Madagascar   | MAHAY (29)        | ASQI | 1613        | 1604        |
| Mali         | PROMIS CS (32)    | DMC  | 927         | 944         |
| Zimbabwe     | SHINE (HIV-) (33) | CDI  | 381         | 373         |
| Zimbabwe     | SHINE (HIV+) (34) | CDI  | 66          | 68          |
|              |                   |      | <b>4382</b> | <b>5437</b> |

**I<sup>2</sup> = 0.72, Tau<sup>2</sup> = 0.02**

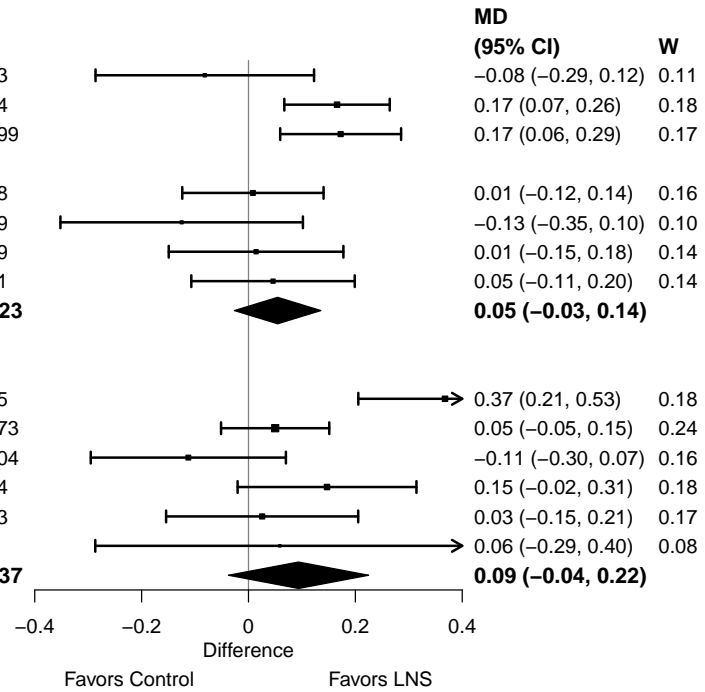

Supplemental figure 4A: Mean difference in language z-score

4A6: Stratified by Sanitation

**Sanitation**  
(p-diff = 0.991)

**Sanitation – Improved**

| Country                                             | Trial            | Tool         | N           | N           |
|-----------------------------------------------------|------------------|--------------|-------------|-------------|
| Bangladesh                                          | JiVitA-4 (21)    | BSID-III     | 445         | 143         |
| Bangladesh                                          | RDNS (22)        | CDI          | 1663        | 814         |
| Bangladesh                                          | WASH-B (23)      | CDI          | 548         | 1099        |
| Ghana                                               | GHANA (25)       |              |             |             |
| Ghana                                               | iLINS-DYADG (26) | CDI          | 331         | 658         |
| Haiti                                               | HAITI (27)       | Total sounds | 150         | 149         |
| Mali                                                | PROMIS CS (32)   | DMC          | 927         | 944         |
| <b>I<sup>2</sup> = 0.59, Tau<sup>2</sup> = 0.01</b> |                  |              | <b>4064</b> | <b>3807</b> |

**Sanitation – Unimproved**

|                                                     |                   |      |             |             |
|-----------------------------------------------------|-------------------|------|-------------|-------------|
| Burkina Faso                                        | iLINS-Zinc (24)   | DMC  | 746         | 375         |
| Kenya                                               | WASH-B (28)       | EASQ | 649         | 2073        |
| Madagascar                                          | MAHAY (29)        | ASQI | 1613        | 1604        |
| Malawi                                              | iLiNS-DYADM (30)  | CDI  | 215         | 439         |
| Malawi                                              | iLiNS-DOSE (31)   | CDI  | 645         | 221         |
| Zimbabwe                                            | SHINE (HIV-) (33) | CDI  | 381         | 373         |
| Zimbabwe                                            | SHINE (HIV+) (34) | CDI  | 66          | 68          |
| <b>I<sup>2</sup> = 0.66, Tau<sup>2</sup> = 0.01</b> |                   |      | <b>4315</b> | <b>5153</b> |

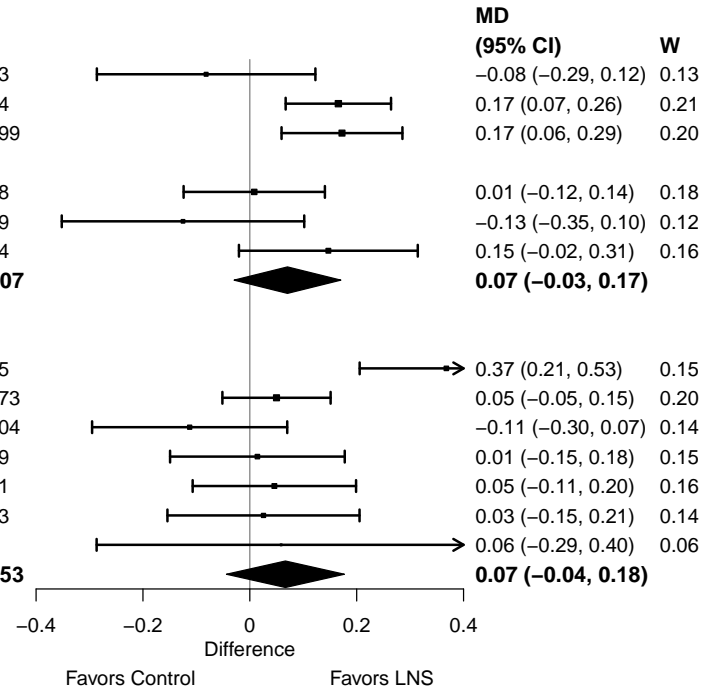

Supplemental figure 4A: Mean difference in language z-score

4A7: Stratified by Supplement duration

Supplement duration  
(p-diff = 0.524)

Supplement duration – 12m or less

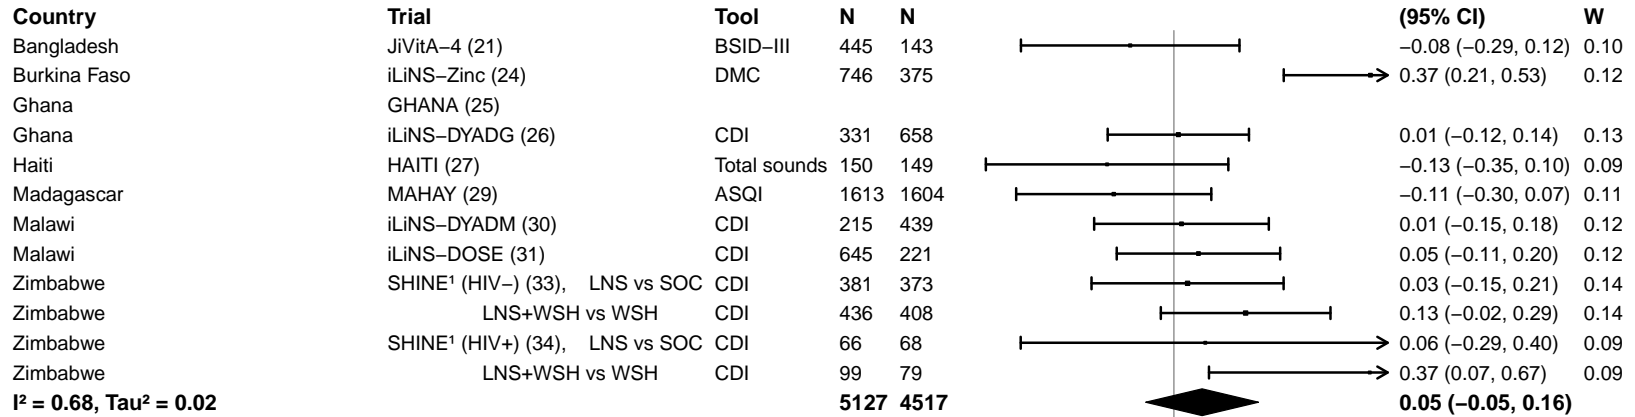

Supplement duration – > 12m

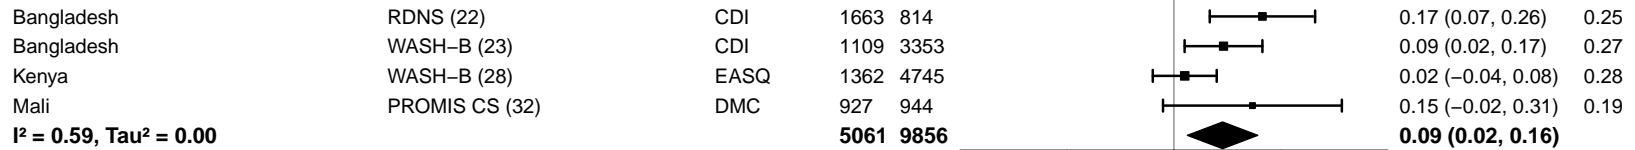

Supplemental figure 4A: Mean difference in language z-score

4A8: Stratified by Frequency of contact

**Frequency of contact**  
(p-diff = 0.853)

**Frequency of contact – Monthly**

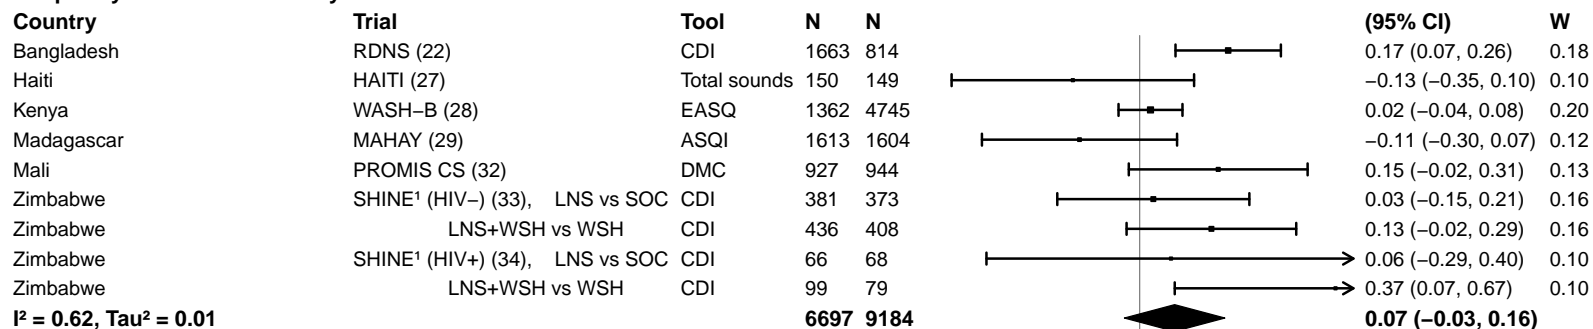

**Frequency of contact – Weekly**

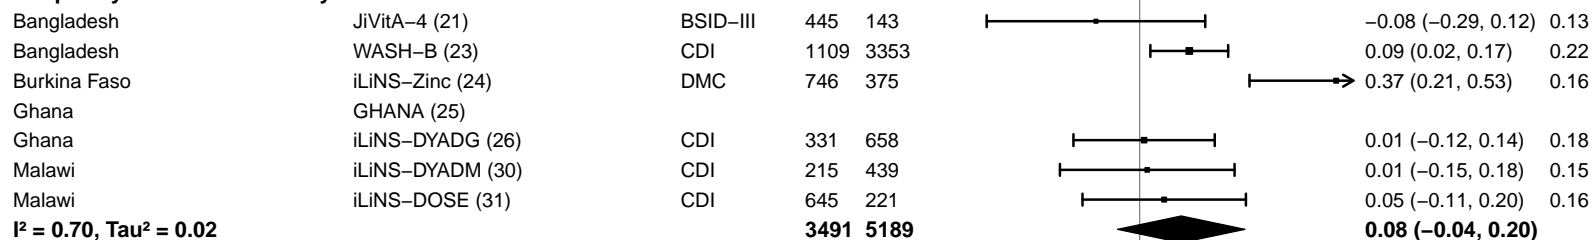

Supplemental figure 4A: Mean difference in language z-score

4A9: Stratified by Average SQ-LNS compliance

Average SQ-LNS compliance  
(p-diff = 0.918)

Average SQ-LNS compliance – Low

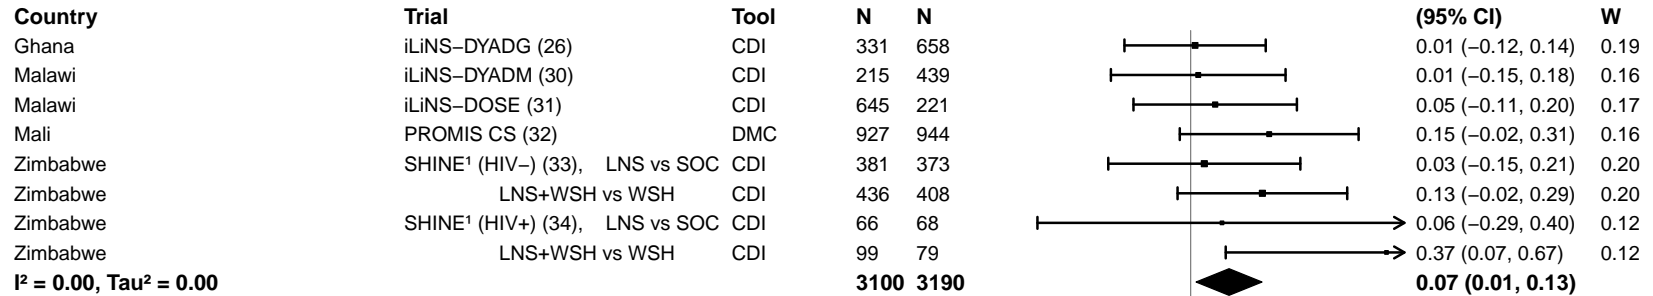

Average SQ-LNS compliance – High

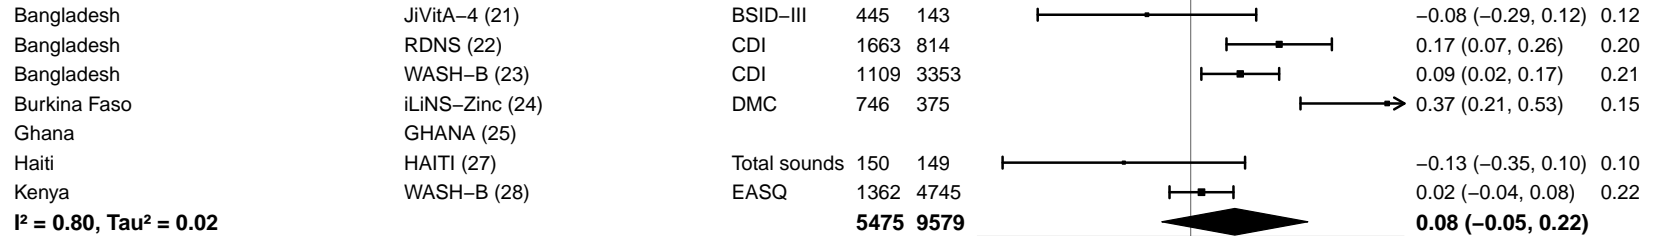

## Supplemental figure 4B: Language lowest decile prevalence ratio

### 4B1: Stratified by Geographic region

**Geographic region**  
(p-diff = 0.624)

**Geographic region – SEAR**

| Country    | Trial         | Tool     | N           | N           |
|------------|---------------|----------|-------------|-------------|
| Bangladesh | JiVitA-4 (21) | BSID-III | 445         | 143         |
| Bangladesh | RDNS (22)     | CDI      | 1663        | 814         |
| Bangladesh | WASH-B (23)   | CDI      | 1109        | 3353        |
|            |               |          | <b>3217</b> | <b>4310</b> |

$I^2 = 0.00$ ,  $\text{Tau}^2 = 0.00$

**Geographic region – AFR**

|              |                                            |      |             |             |
|--------------|--------------------------------------------|------|-------------|-------------|
| Burkina Faso | iLiNS-Zinc (24)                            | DMC  | 746         | 375         |
| Ghana        | GHANA (25)                                 |      |             |             |
| Ghana        | iLiNS-DYADG (26)                           | CDI  | 331         | 658         |
| Kenya        | WASH-B (28)                                | EASQ | 1362        | 4745        |
| Madagascar   | MAHAY (29)                                 | ASQI | 1613        | 1604        |
| Malawi       | iLiNS-DYADM (30)                           | CDI  | 215         | 439         |
| Malawi       | iLiNS-DOSE (31)                            | CDI  | 645         | 221         |
| Mali         | PROMIS CS (32)                             | DMC  | 927         | 944         |
| Zimbabwe     | SHINE <sup>1</sup> (HIV-) (33), LNS vs SOC | CDI  | 381         | 373         |
| Zimbabwe     | LNS+WSH vs WSH                             | CDI  | 436         | 408         |
| Zimbabwe     | SHINE <sup>1</sup> (HIV+) (34), LNS vs SOC | CDI  | 66          | 68          |
| Zimbabwe     | LNS+WSH vs WSH                             | CDI  | 99          | 79          |
|              |                                            |      | <b>6821</b> | <b>9914</b> |

$I^2 = 0.59$ ,  $\text{Tau}^2 = 0.04$

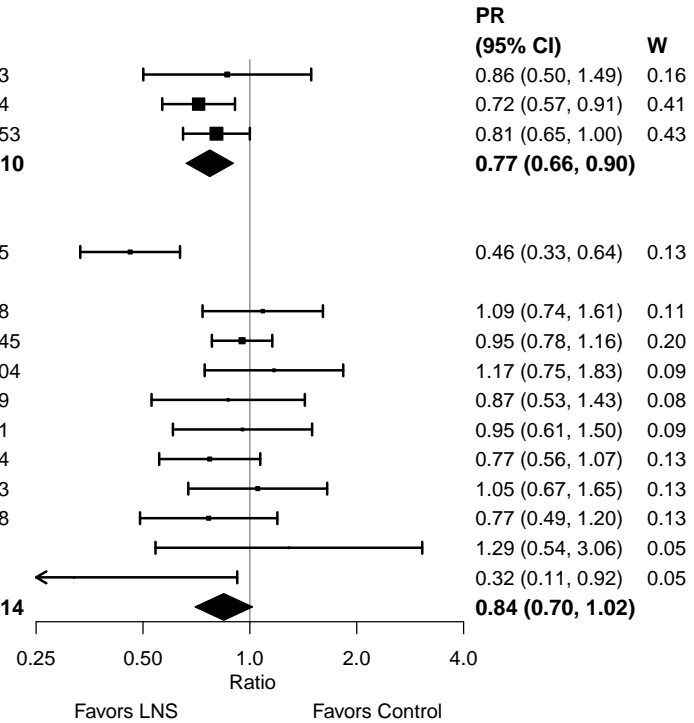

Supplemental figure 4B: Language lowest decile prevalence ratio

4B2: Stratified by Stunting burden

**Stunting burden**

(p-diff = 0.046)

**Stunting burden – Less than 35%**

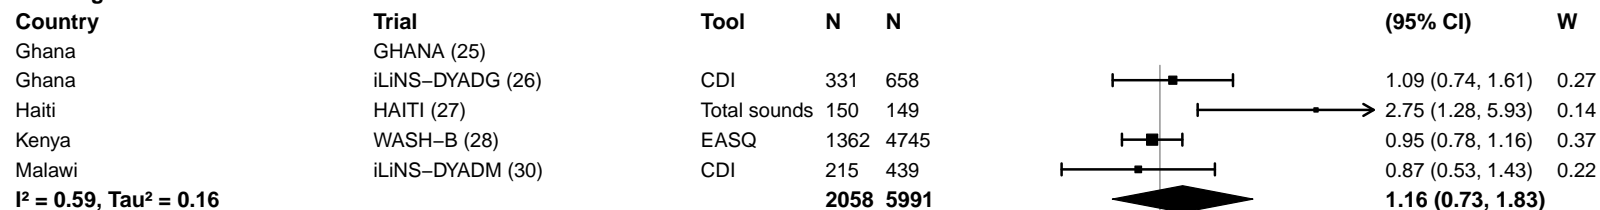

**Stunting burden – More than 35%**

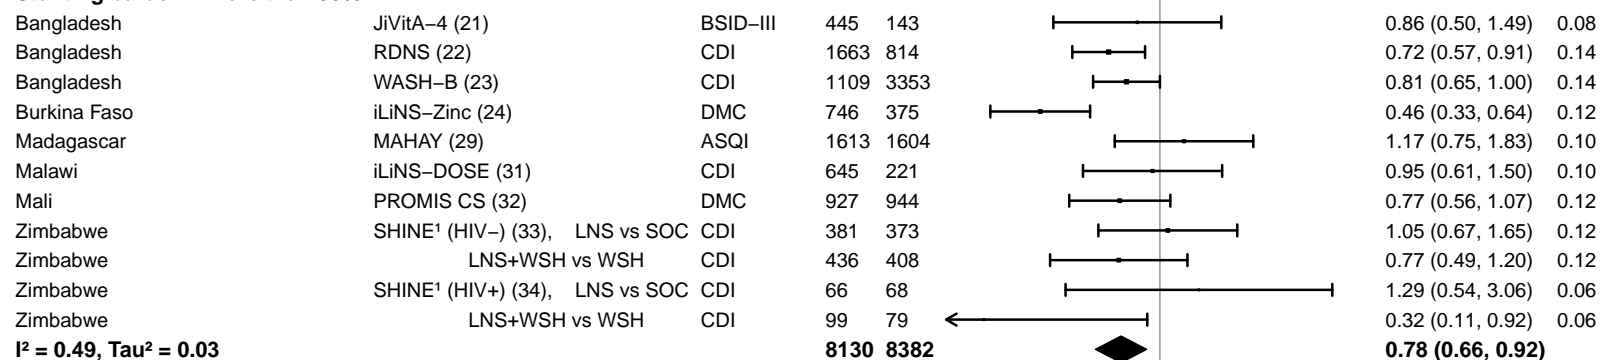

Supplemental figure 4B: Language lowest decile prevalence ratio

4B3: Stratified by Malaria prevalence

**Malaria prevalence**  
(p-diff = 0.322)

**Malaria prevalence – Less than 10%**

| Country    | Trial                                      | Tool         | N           | N            |
|------------|--------------------------------------------|--------------|-------------|--------------|
| Bangladesh | JiVitA-4 (21)                              | BSID-III     | 445         | 143          |
| Bangladesh | RDNS (22)                                  | CDI          | 1663        | 814          |
| Bangladesh | WASH-B (23)                                | CDI          | 1109        | 3353         |
| Haiti      | HAITI (27)                                 | Total sounds | 150         | 149          |
| Kenya      | WASH-B (28)                                | EASQ         | 1362        | 4745         |
| Madagascar | MAHAY (29)                                 | ASQI         | 1613        | 1604         |
| Zimbabwe   | SHINE <sup>1</sup> (HIV-) (33), LNS vs SOC | CDI          | 381         | 373          |
| Zimbabwe   | LNS+WSH vs WSH                             | CDI          | 436         | 408          |
| Zimbabwe   | SHINE <sup>1</sup> (HIV+) (34), LNS vs SOC | CDI          | 66          | 68           |
| Zimbabwe   | LNS+WSH vs WSH                             | CDI          | 99          | 79           |
|            |                                            |              | <b>7324</b> | <b>11736</b> |

**I<sup>2</sup> = 0.52, Tau<sup>2</sup> = 0.08**

**Malaria prevalence – At least 10%**

|              |                  |     |             |             |
|--------------|------------------|-----|-------------|-------------|
| Burkina Faso | iLiNS-Zinc (24)  | DMC | 746         | 375         |
| Ghana        | GHANA (25)       |     |             |             |
| Ghana        | iLiNS-DYADG (26) | CDI | 331         | 658         |
| Malawi       | iLiNS-DYADM (30) | CDI | 215         | 439         |
| Malawi       | iLiNS-DOSE (31)  | CDI | 645         | 221         |
| Mali         | PROMIS CS (32)   | DMC | 927         | 944         |
|              |                  |     | <b>2864</b> | <b>2637</b> |

**I<sup>2</sup> = 0.71, Tau<sup>2</sup> = 0.08**

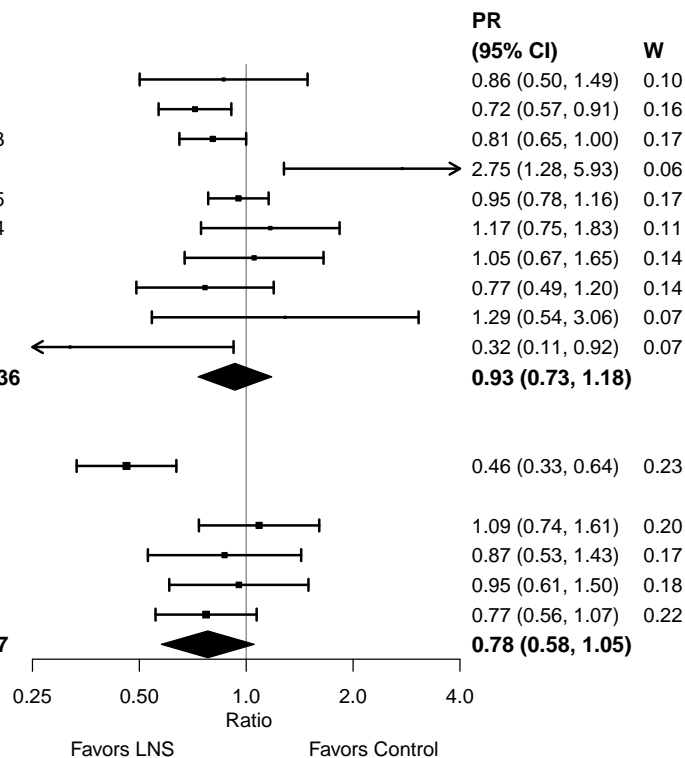



Supplemental figure 4B: Language lowest decile prevalence ratio

4B4: Stratified by Anemia prevalence

**Anemia prevalence**

(p-diff = 0.644)

**Anemia prevalence – High**

| Country      | Trial            | Tool         | N           | N           | PR (95% CI)              | W    |
|--------------|------------------|--------------|-------------|-------------|--------------------------|------|
| Burkina Faso | iLiNS-Zinc (24)  | DMC          | 746         | 375         | 0.46 (0.33, 0.64)        | 0.25 |
| Ghana        | GHANA (25)       |              |             |             |                          |      |
| Haiti        | HAITI (27)       | Total sounds | 150         | 149         | 2.75 (1.28, 5.93)        | 0.11 |
| Malawi       | iLiNS-DYADM (30) | CDI          | 215         | 439         | 0.87 (0.53, 1.43)        | 0.18 |
| Malawi       | iLiNS-DOSE (31)  | CDI          | 645         | 221         | 0.95 (0.61, 1.50)        | 0.20 |
| Mali         | PROMIS CS (32)   | DMC          | 927         | 944         | 0.77 (0.56, 1.07)        | 0.25 |
|              |                  |              | <b>2683</b> | <b>2128</b> | <b>0.90 (0.53, 1.55)</b> |      |

**I<sup>2</sup> = 0.81, Tau<sup>2</sup> = 0.32**

**Anemia prevalence – Moderate**

|            |                                            |          |             |              |                          |      |
|------------|--------------------------------------------|----------|-------------|--------------|--------------------------|------|
| Bangladesh | JiVitA-4 (21)                              | BSID-III | 445         | 143          | 0.86 (0.50, 1.49)        | 0.09 |
| Bangladesh | RDNS (22)                                  | CDI      | 1663        | 814          | 0.72 (0.57, 0.91)        | 0.15 |
| Bangladesh | WASH-B (23)                                | CDI      | 1109        | 3353         | 0.81 (0.65, 1.00)        | 0.16 |
| Ghana      | iLiNS-DYADG (26)                           | CDI      | 331         | 658          | 1.09 (0.74, 1.61)        | 0.12 |
| Kenya      | WASH-B (28)                                | EASQ     | 1362        | 4745         | 0.95 (0.78, 1.16)        | 0.16 |
| Madagascar | MAHAY (29)                                 | ASQI     | 1613        | 1604         | 1.17 (0.75, 1.83)        | 0.11 |
| Zimbabwe   | SHINE <sup>1</sup> (HIV-) (33), LNS vs SOC | CDI      | 381         | 373          | 1.05 (0.67, 1.65)        | 0.14 |
| Zimbabwe   | LNS+WSH vs WSH                             | CDI      | 436         | 408          | 0.77 (0.49, 1.20)        | 0.14 |
| Zimbabwe   | SHINE <sup>1</sup> (HIV+) (34), LNS vs SOC | CDI      | 66          | 68           | 1.29 (0.54, 3.06)        | 0.07 |
| Zimbabwe   | LNS+WSH vs WSH                             | CDI      | 99          | 79           | 0.32 (0.11, 0.92)        | 0.07 |
|            |                                            |          | <b>7505</b> | <b>12245</b> | <b>0.87 (0.78, 0.97)</b> |      |

**I<sup>2</sup> = 0.03, Tau<sup>2</sup> = 0.00**

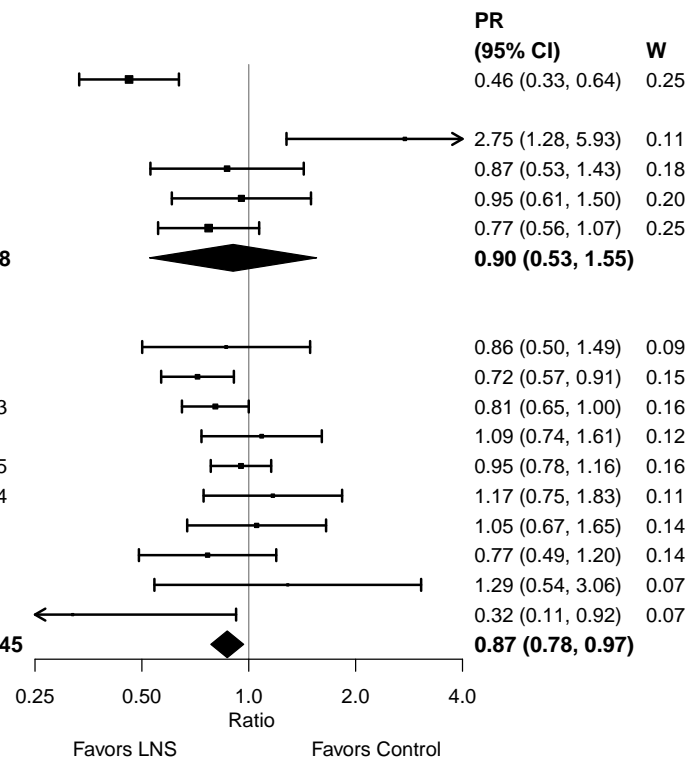

Supplemental figure 4B: Language lowest decile prevalence ratio

4B5: Stratified by Source water quality

**Source water quality**  
(p-diff = 0.737)

**Source water quality – Improved**

| Country                                             | Trial            | Tool         | N           | N           |
|-----------------------------------------------------|------------------|--------------|-------------|-------------|
| Bangladesh                                          | JiVitA-4 (21)    | BSID-III     | 445         | 143         |
| Bangladesh                                          | RDNS (22)        | CDI          | 1663        | 814         |
| Bangladesh                                          | WASH-B (23)      | CDI          | 548         | 1099        |
| Ghana                                               | GHANA (25)       |              |             |             |
| Ghana                                               | iLiNS-DYADG (26) | CDI          | 331         | 658         |
| Haiti                                               | HAITI (27)       | Total sounds | 150         | 149         |
| Malawi                                              | iLiNS-DYADM (30) | CDI          | 215         | 439         |
| Malawi                                              | iLiNS-DOSE (31)  | CDI          | 645         | 221         |
| <b>I<sup>2</sup> = 0.61, Tau<sup>2</sup> = 0.12</b> |                  |              | <b>3997</b> | <b>3523</b> |

**Source water quality – Unimproved**

|                                                     |                   |      |             |             |
|-----------------------------------------------------|-------------------|------|-------------|-------------|
| Burkina Faso                                        | iLiNS-Zinc (24)   | DMC  | 746         | 375         |
| Kenya                                               | WASH-B (28)       | EASQ | 649         | 2073        |
| Madagascar                                          | MAHAY (29)        | ASQI | 1613        | 1604        |
| Mali                                                | PROMIS CS (32)    | DMC  | 927         | 944         |
| Zimbabwe                                            | SHINE (HIV-) (33) | CDI  | 381         | 373         |
| Zimbabwe                                            | SHINE (HIV+) (34) | CDI  | 66          | 68          |
| <b>I<sup>2</sup> = 0.72, Tau<sup>2</sup> = 0.09</b> |                   |      | <b>4382</b> | <b>5437</b> |

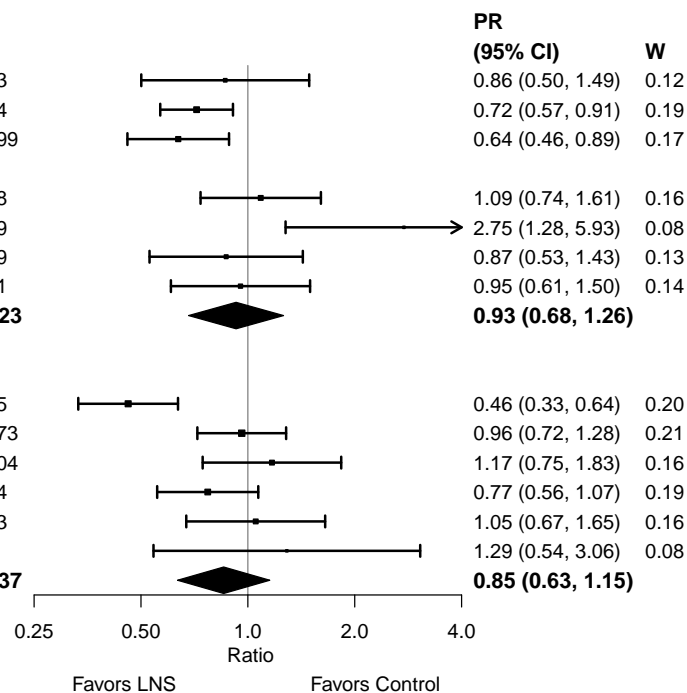

Supplemental figure 4B: Language lowest decile prevalence ratio

4B6: Stratified by Sanitation

**Sanitation**  
(p-diff = 0.994)

**Sanitation – Improved**

| Country                                             | Trial            | Tool         | N           | N           |
|-----------------------------------------------------|------------------|--------------|-------------|-------------|
| Bangladesh                                          | JiVitA-4 (21)    | BSID-III     | 445         | 143         |
| Bangladesh                                          | RDNS (22)        | CDI          | 1663        | 814         |
| Bangladesh                                          | WASH-B (23)      | CDI          | 548         | 1099        |
| Ghana                                               | GHANA (25)       |              |             |             |
| Ghana                                               | iLiNS-DYADG (26) | CDI          | 331         | 658         |
| Haiti                                               | HAITI (27)       | Total sounds | 150         | 149         |
| Mali                                                | PROMIS CS (32)   | DMC          | 927         | 944         |
| <b>I<sup>2</sup> = 0.67, Tau<sup>2</sup> = 0.17</b> |                  |              | <b>4064</b> | <b>3807</b> |

**Sanitation – Unimproved**

|                                                     |                   |      |             |             |
|-----------------------------------------------------|-------------------|------|-------------|-------------|
| Burkina Faso                                        | iLiNS-Zinc (24)   | DMC  | 746         | 375         |
| Kenya                                               | WASH-B (28)       | EASQ | 649         | 2073        |
| Madagascar                                          | MAHAY (29)        | ASQI | 1613        | 1604        |
| Malawi                                              | iLiNS-DYADM (30)  | CDI  | 215         | 439         |
| Malawi                                              | iLiNS-DOSE (31)   | CDI  | 645         | 221         |
| Zimbabwe                                            | SHINE (HIV-) (33) | CDI  | 381         | 373         |
| Zimbabwe                                            | SHINE (HIV+) (34) | CDI  | 66          | 68          |
| <b>I<sup>2</sup> = 0.67, Tau<sup>2</sup> = 0.07</b> |                   |      | <b>4315</b> | <b>5153</b> |

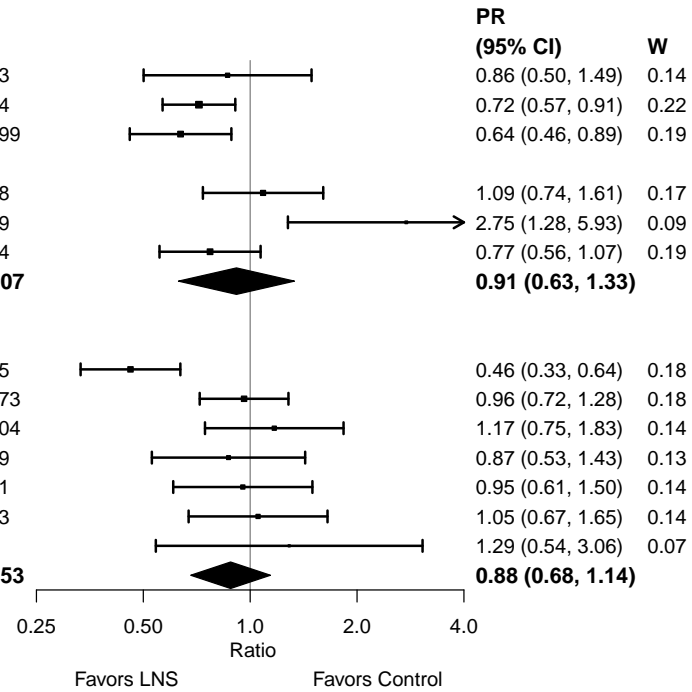

Supplemental figure 4B: Language lowest decile prevalence ratio

4B7: Stratified by Supplement duration

Supplement duration  
(p-diff = 0.545)

Supplement duration – 12m or less

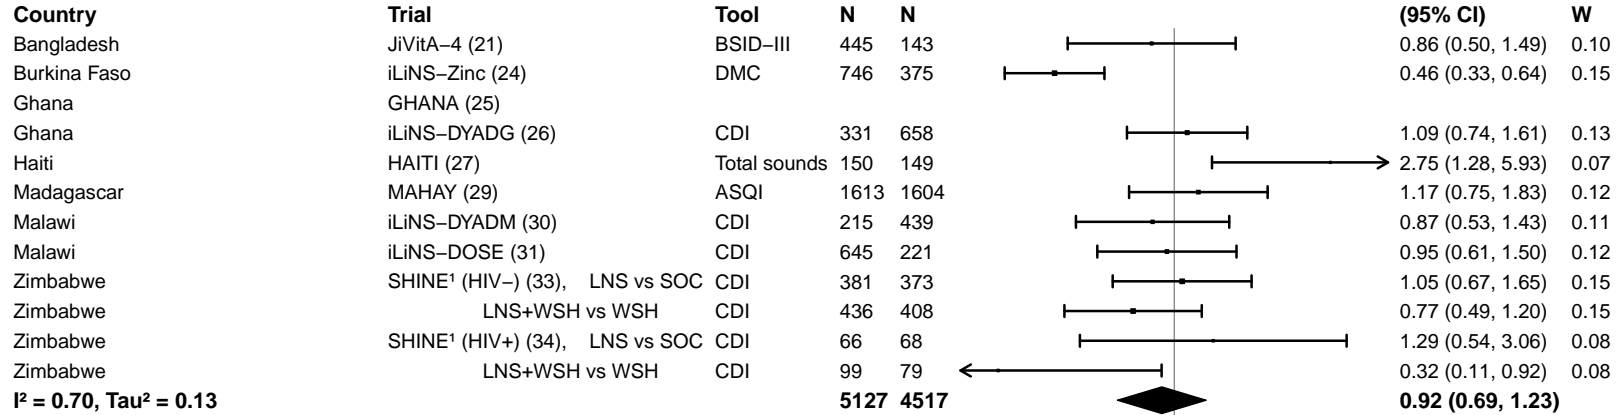

Supplement duration – > 12m

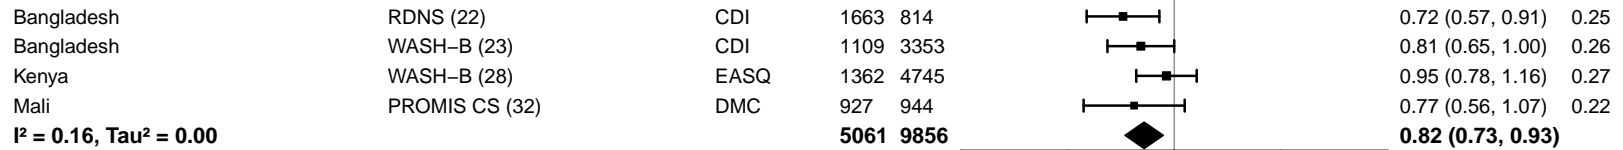

Supplemental figure 4B: Language lowest decile prevalence ratio

4B8: Stratified by Frequency of contact

Frequency of contact  
(p-diff = 0.370)

Frequency of contact – Monthly

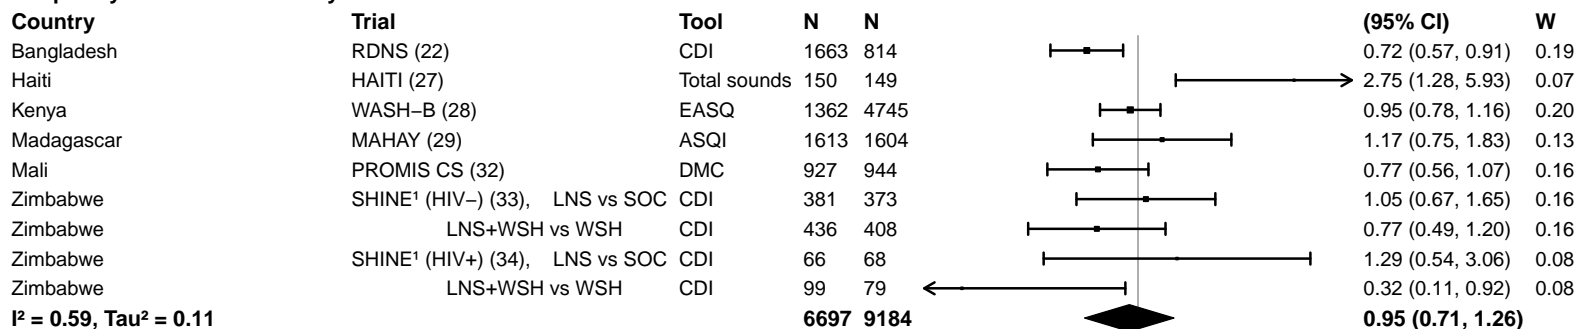

Frequency of contact – Weekly

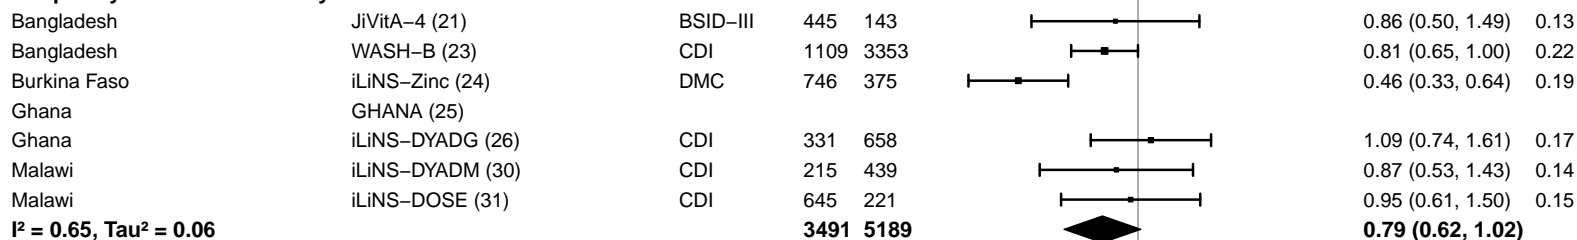

Supplemental figure 4B: Language lowest decile prevalence ratio

4B9: Stratified by Average SQ-LNS compliance

Average SQ-LNS compliance  
(p-diff = 0.616)

Average SQ-LNS compliance – Low

| Country  | Trial                                      | Tool | N           | N           | PR<br>(95% CI)           | W    |
|----------|--------------------------------------------|------|-------------|-------------|--------------------------|------|
| Ghana    | iLiNS-DYADG (26)                           | CDI  | 331         | 658         | 1.09 (0.74, 1.61)        | 0.18 |
| Malawi   | iLiNS-DYADM (30)                           | CDI  | 215         | 439         | 0.87 (0.53, 1.43)        | 0.15 |
| Malawi   | iLiNS-DOSE (31)                            | CDI  | 645         | 221         | 0.95 (0.61, 1.50)        | 0.16 |
| Mali     | PROMIS CS (32)                             | DMC  | 927         | 944         | 0.77 (0.56, 1.07)        | 0.20 |
| Zimbabwe | SHINE <sup>1</sup> (HIV-) (33), LNS vs SOC | CDI  | 381         | 373         | 1.05 (0.67, 1.65)        | 0.20 |
| Zimbabwe | LNS+WSH vs WSH                             | CDI  | 436         | 408         | 0.77 (0.49, 1.20)        | 0.20 |
| Zimbabwe | SHINE <sup>1</sup> (HIV+) (34), LNS vs SOC | CDI  | 66          | 68          | 1.29 (0.54, 3.06)        | 0.11 |
| Zimbabwe | LNS+WSH vs WSH                             | CDI  | 99          | 79          | 0.32 (0.11, 0.92)        | 0.11 |
|          |                                            |      | <b>3100</b> | <b>3190</b> | <b>0.88 (0.75, 1.04)</b> |      |

I<sup>2</sup> = 0.00, Tau<sup>2</sup> = 0.00

Average SQ-LNS compliance – High

|              |                 |              |             |             |                          |      |
|--------------|-----------------|--------------|-------------|-------------|--------------------------|------|
| Bangladesh   | JiVitA-4 (21)   | BSID-III     | 445         | 143         | 0.86 (0.50, 1.49)        | 0.12 |
| Bangladesh   | RDNS (22)       | CDI          | 1663        | 814         | 0.72 (0.57, 0.91)        | 0.20 |
| Bangladesh   | WASH-B (23)     | CDI          | 1109        | 3353        | 0.81 (0.65, 1.00)        | 0.21 |
| Burkina Faso | iLiNS-Zinc (24) | DMC          | 746         | 375         | 0.46 (0.33, 0.64)        | 0.18 |
| Ghana        | GHANA (25)      |              |             |             |                          |      |
| Haiti        | HAITI (27)      | Total sounds | 150         | 149         | 2.75 (1.28, 5.93)        | 0.08 |
| Kenya        | WASH-B (28)     | EASQ         | 1362        | 4745        | 0.95 (0.78, 1.16)        | 0.21 |
|              |                 |              | <b>5475</b> | <b>9579</b> | <b>0.86 (0.56, 1.33)</b> |      |

I<sup>2</sup> = 0.80, Tau<sup>2</sup> = 0.25

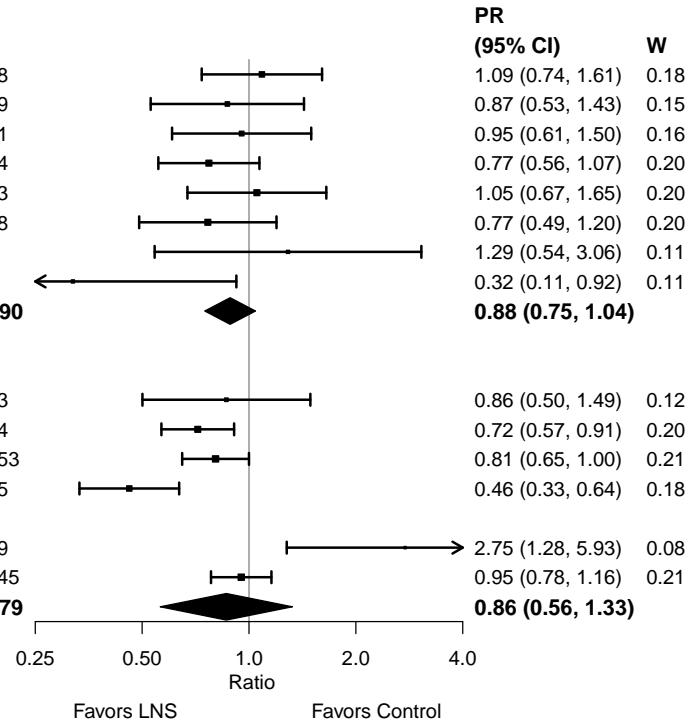

## Supplemental figure 4C: Language lowest decile prevalence difference

### 4C1: Stratified by Geographic region

#### Geographic region

(p-diff = 0.484)

#### Geographic region – SEAR

| Country    | Trial         | Tool     | N           | N           |
|------------|---------------|----------|-------------|-------------|
| Bangladesh | JiVitA-4 (21) | BSID-III | 445         | 143         |
| Bangladesh | RDNS (22)     | CDI      | 1663        | 814         |
| Bangladesh | WASH-B (23)   | CDI      | 1109        | 3353        |
|            |               |          | <b>3217</b> | <b>4310</b> |

**I<sup>2</sup> = 0.00, Tau<sup>2</sup> = 0.00**

#### Geographic region – AFR

|              |                                            |      |             |             |
|--------------|--------------------------------------------|------|-------------|-------------|
| Burkina Faso | iLiNS-Zinc (24)                            | DMC  | 746         | 375         |
| Ghana        | GHANA (25)                                 |      |             |             |
| Ghana        | iLiNS-DYADG (26)                           | CDI  | 331         | 658         |
| Kenya        | WASH-B (28)                                | EASQ | 1362        | 4745        |
| Madagascar   | MAHAY (29)                                 | ASQI | 1613        | 1604        |
| Malawi       | iLiNS-DYADM (30)                           | CDI  | 215         | 439         |
| Malawi       | iLiNS-DOSE (31)                            | CDI  | 645         | 221         |
| Mali         | PROMIS CS (32)                             | DMC  | 927         | 944         |
| Zimbabwe     | SHINE <sup>1</sup> (HIV-) (33), LNS vs SOC | CDI  | 381         | 373         |
| Zimbabwe     | LNS+WSH vs WSH                             | CDI  | 436         | 408         |
| Zimbabwe     | SHINE <sup>1</sup> (HIV+) (34), LNS vs SOC | CDI  | 66          | 68          |
| Zimbabwe     | LNS+WSH vs WSH                             | CDI  | 99          | 79          |
|              |                                            |      | <b>6821</b> | <b>9914</b> |

**I<sup>2</sup> = 0.63, Tau<sup>2</sup> = 0.00**

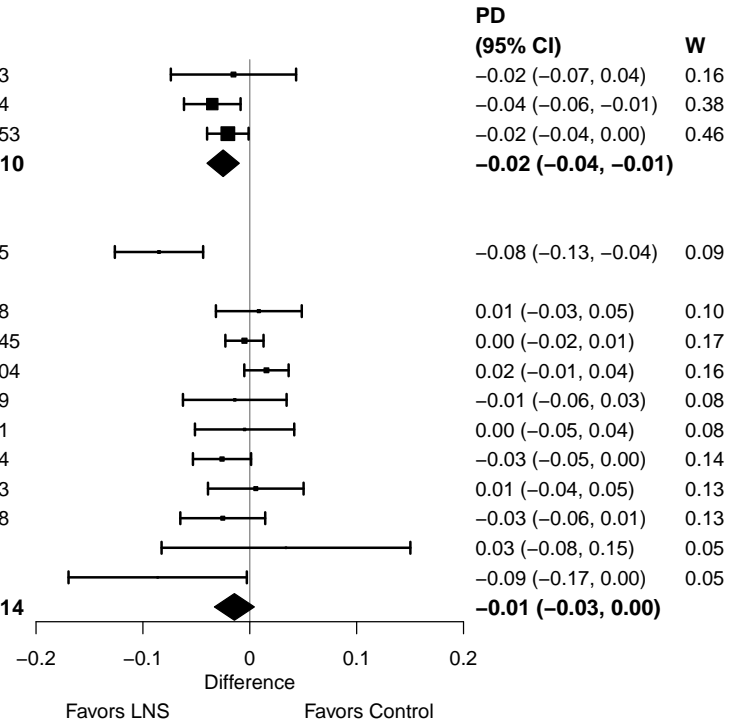

Supplemental figure 4C: Language lowest decile prevalence difference

4C2: Stratified by Stunting burden

**Stunting burden**  
(p-diff = 0.073)

**Stunting burden – Less than 35%**

| Country | Trial            | Tool         | N           | N           | PD (95% CI)               | W    |
|---------|------------------|--------------|-------------|-------------|---------------------------|------|
| Ghana   | GHANA (25)       |              |             |             |                           |      |
| Ghana   | iLiNS-DYADG (26) | CDI          | 331         | 658         | 0.01 (-0.03, 0.05)        | 0.26 |
| Haiti   | HAITI (27)       | Total sounds | 150         | 149         | 0.10 (0.03, 0.16)         | 0.16 |
| Kenya   | WASH-B (28)      | EASQ         | 1362        | 4745        | 0.00 (-0.02, 0.01)        | 0.35 |
| Malawi  | iLiNS-DYADM (30) | CDI          | 215         | 439         | -0.01 (-0.06, 0.03)       | 0.23 |
|         |                  |              | <b>2058</b> | <b>5991</b> | <b>0.02 (-0.03, 0.06)</b> |      |

$I^2 = 0.65, \text{Tau}^2 = 0.00$

**Stunting burden – More than 35%**

|              |                                            |          |             |             |                            |      |
|--------------|--------------------------------------------|----------|-------------|-------------|----------------------------|------|
| Bangladesh   | JiVitA-4 (21)                              | BSID-III | 445         | 143         | -0.02 (-0.07, 0.04)        | 0.08 |
| Bangladesh   | RDNS (22)                                  | CDI      | 1663        | 814         | -0.04 (-0.06, -0.01)       | 0.13 |
| Bangladesh   | WASH-B (23)                                | CDI      | 1109        | 3353        | -0.02 (-0.04, 0.00)        | 0.14 |
| Burkina Faso | iLiNS-Zinc (24)                            | DMC      | 746         | 375         | -0.08 (-0.13, -0.04)       | 0.10 |
| Madagascar   | MAHAY (29)                                 | ASQI     | 1613        | 1604        | 0.02 (-0.01, 0.04)         | 0.14 |
| Malawi       | iLiNS-DOSE (31)                            | CDI      | 645         | 221         | 0.00 (-0.05, 0.04)         | 0.10 |
| Mali         | PROMIS CS (32)                             | DMC      | 927         | 944         | -0.03 (-0.05, 0.00)        | 0.13 |
| Zimbabwe     | SHINE <sup>1</sup> (HIV-) (33), LNS vs SOC | CDI      | 381         | 373         | 0.01 (-0.04, 0.05)         | 0.12 |
| Zimbabwe     | LNS+WSH vs WSH                             | CDI      | 436         | 408         | -0.03 (-0.06, 0.01)        | 0.12 |
| Zimbabwe     | SHINE <sup>1</sup> (HIV+) (34), LNS vs SOC | CDI      | 66          | 68          | 0.03 (-0.08, 0.15)         | 0.07 |
| Zimbabwe     | LNS+WSH vs WSH                             | CDI      | 99          | 79          | -0.09 (-0.17, 0.00)        | 0.07 |
|              |                                            |          | <b>8130</b> | <b>8382</b> | <b>-0.02 (-0.04, 0.00)</b> |      |

$I^2 = 0.65, \text{Tau}^2 = 0.00$

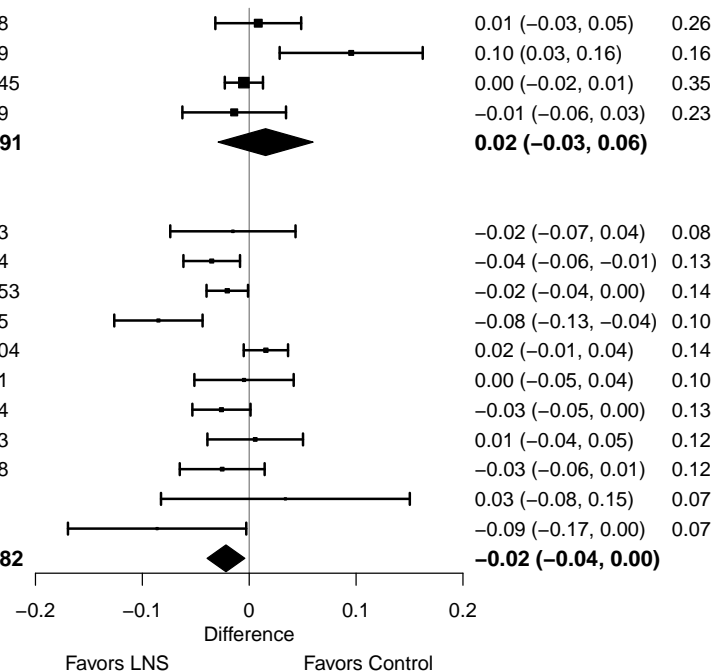



Supplemental figure 4C: Language lowest decile prevalence difference

4C3: Stratified by Malaria prevalence

**Malaria prevalence**

(p-diff = 0.289)

**Malaria prevalence – Less than 10%**

| Country    | Tool                                       | N           | N            |
|------------|--------------------------------------------|-------------|--------------|
| Bangladesh | JiVitA-4 (21)                              | 445         | 143          |
| Bangladesh | RDNS (22)                                  | 1663        | 814          |
| Bangladesh | WASH-B (23)                                | 1109        | 3353         |
| Haiti      | HAITI (27)                                 | 150         | 149          |
| Kenya      | WASH-B (28)                                | 1362        | 4745         |
| Madagascar | MAHAY (29)                                 | 1613        | 1604         |
| Zimbabwe   | SHINE <sup>1</sup> (HIV-) (33), LNS vs SOC | 381         | 373          |
| Zimbabwe   | LNS+WSH vs WSH                             | 436         | 408          |
| Zimbabwe   | SHINE <sup>1</sup> (HIV+) (34), LNS vs SOC | 66          | 68           |
| Zimbabwe   | LNS+WSH vs WSH                             | 99          | 79           |
|            |                                            | <b>7324</b> | <b>11736</b> |

**I<sup>2</sup> = 0.66, Tau<sup>2</sup> = 0.00**

**Malaria prevalence – At least 10%**

|              |                  |             |             |
|--------------|------------------|-------------|-------------|
| Burkina Faso | iLiNS-Zinc (24)  | 746         | 375         |
| Ghana        | GHANA (25)       |             |             |
| Ghana        | iLiNS-DYADG (26) | 331         | 658         |
| Malawi       | iLiNS-DYADM (30) | 215         | 439         |
| Malawi       | iLiNS-DOSE (31)  | 645         | 221         |
| Mali         | PROMIS CS (32)   | 927         | 944         |
|              |                  | <b>2864</b> | <b>2637</b> |

**I<sup>2</sup> = 0.66, Tau<sup>2</sup> = 0.00**

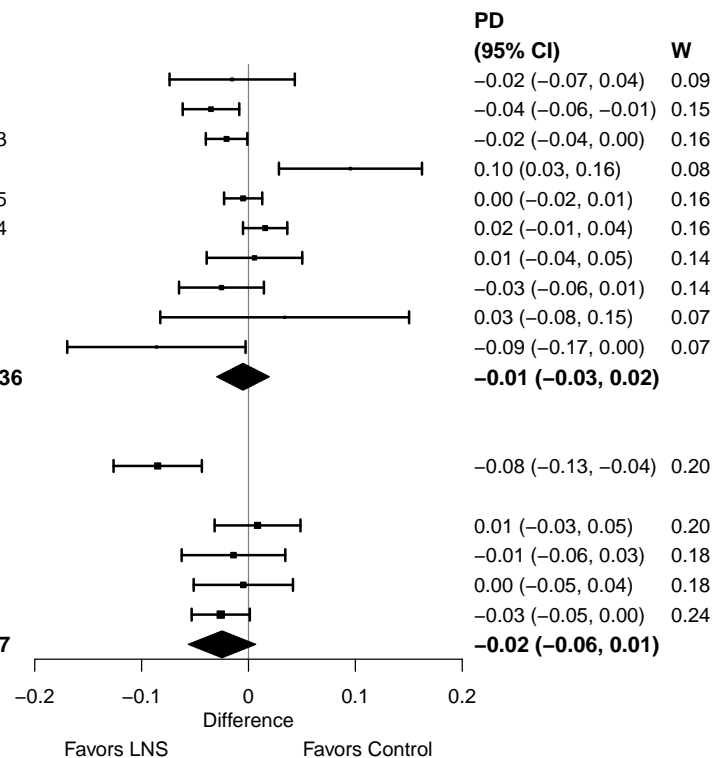

Supplemental figure 4C: Language lowest decile prevalence difference

4C4: Stratified by Anemia prevalence

**Anemia prevalence**

(p-diff = 0.762)

**Anemia prevalence – High**

| Country      | Trial            | Tool         | N           | N           |
|--------------|------------------|--------------|-------------|-------------|
| Burkina Faso | iLiNS-Zinc (24)  | DMC          | 746         | 375         |
| Ghana        | GHANA (25)       |              |             |             |
| Haiti        | HAITI (27)       | Total sounds | 150         | 149         |
| Malawi       | iLiNS-DYADM (30) | CDI          | 215         | 439         |
| Malawi       | iLiNS-DOSE (31)  | CDI          | 645         | 221         |
| Mali         | PROMIS CS (32)   | DMC          | 927         | 944         |
|              |                  |              | <b>2683</b> | <b>2128</b> |

**I<sup>2</sup> = 0.81, Tau<sup>2</sup> = 0.00**

**Anemia prevalence – Moderate**

|            |                                            |          |             |              |
|------------|--------------------------------------------|----------|-------------|--------------|
| Bangladesh | JiVitA-4 (21)                              | BSID-III | 445         | 143          |
| Bangladesh | RDNS (22)                                  | CDI      | 1663        | 814          |
| Bangladesh | WASH-B (23)                                | CDI      | 1109        | 3353         |
| Ghana      | iLiNS-DYADG (26)                           | CDI      | 331         | 658          |
| Kenya      | WASH-B (28)                                | EASQ     | 1362        | 4745         |
| Madagascar | MAHAY (29)                                 | ASQI     | 1613        | 1604         |
| Zimbabwe   | SHINE <sup>1</sup> (HIV-) (33), LNS vs SOC | CDI      | 381         | 373          |
| Zimbabwe   | LNS+WSH vs WSH                             | CDI      | 436         | 408          |
| Zimbabwe   | SHINE <sup>1</sup> (HIV+) (34), LNS vs SOC | CDI      | 66          | 68           |
| Zimbabwe   | LNS+WSH vs WSH                             | CDI      | 99          | 79           |
|            |                                            |          | <b>7505</b> | <b>12245</b> |

**I<sup>2</sup> = 0.42, Tau<sup>2</sup> = 0.00**

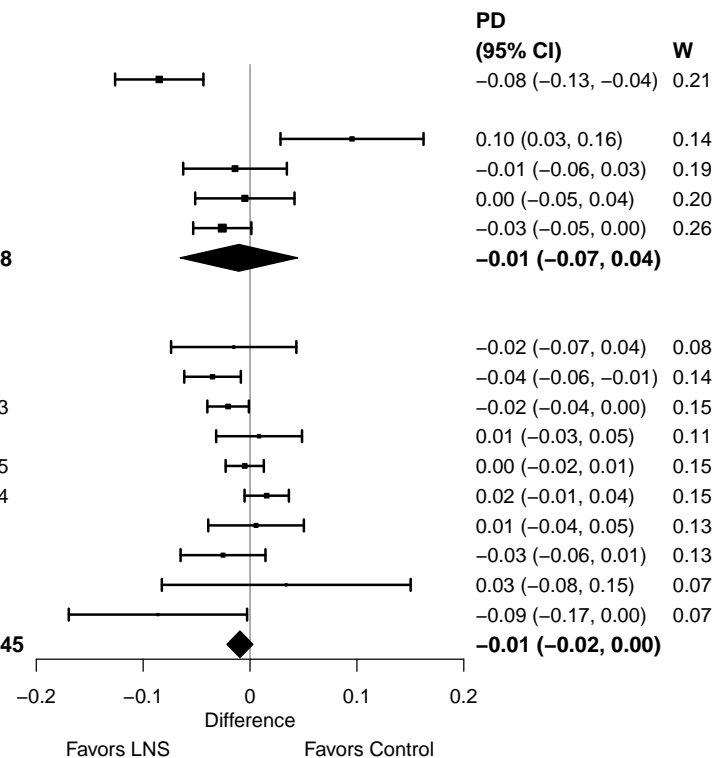

Supplemental figure 4C: Language lowest decile prevalence difference

4C5: Stratified by Source water quality

Source water quality  
(p-diff = 0.748)

Source water quality – Improved

| Country                                             | Trial            | Tool         | N           | N           |
|-----------------------------------------------------|------------------|--------------|-------------|-------------|
| Bangladesh                                          | JiVitA-4 (21)    | BSID-III     | 445         | 143         |
| Bangladesh                                          | RDNS (22)        | CDI          | 1663        | 814         |
| Bangladesh                                          | WASH-B (23)      | CDI          | 548         | 1099        |
| Ghana                                               | GHANA (25)       |              |             |             |
| Ghana                                               | iLiNS-DYADG (26) | CDI          | 331         | 658         |
| Haiti                                               | HAITI (27)       | Total sounds | 150         | 149         |
| Malawi                                              | iLiNS-DYADM (30) | CDI          | 215         | 439         |
| Malawi                                              | iLiNS-DOSE (31)  | CDI          | 645         | 221         |
| <b>I<sup>2</sup> = 0.65, Tau<sup>2</sup> = 0.00</b> |                  |              | <b>3997</b> | <b>3523</b> |

Source water quality – Unimproved

|                                                     |                   |      |             |             |
|-----------------------------------------------------|-------------------|------|-------------|-------------|
| Burkina Faso                                        | iLiNS-Zinc (24)   | DMC  | 746         | 375         |
| Kenya                                               | WASH-B (28)       | EASQ | 649         | 2073        |
| Madagascar                                          | MAHAY (29)        | ASQI | 1613        | 1604        |
| Mali                                                | PROMIS CS (32)    | DMC  | 927         | 944         |
| Zimbabwe                                            | SHINE (HIV-) (33) | CDI  | 381         | 373         |
| Zimbabwe                                            | SHINE (HIV+) (34) | CDI  | 66          | 68          |
| <b>I<sup>2</sup> = 0.76, Tau<sup>2</sup> = 0.00</b> |                   |      | <b>4382</b> | <b>5437</b> |

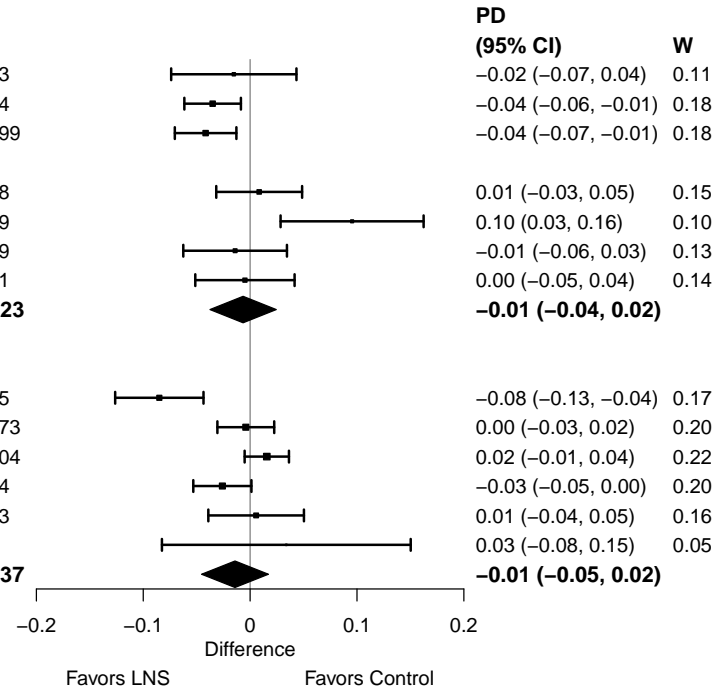

Supplemental figure 4C: Language lowest decile prevalence difference

4C6: Stratified by Sanitation

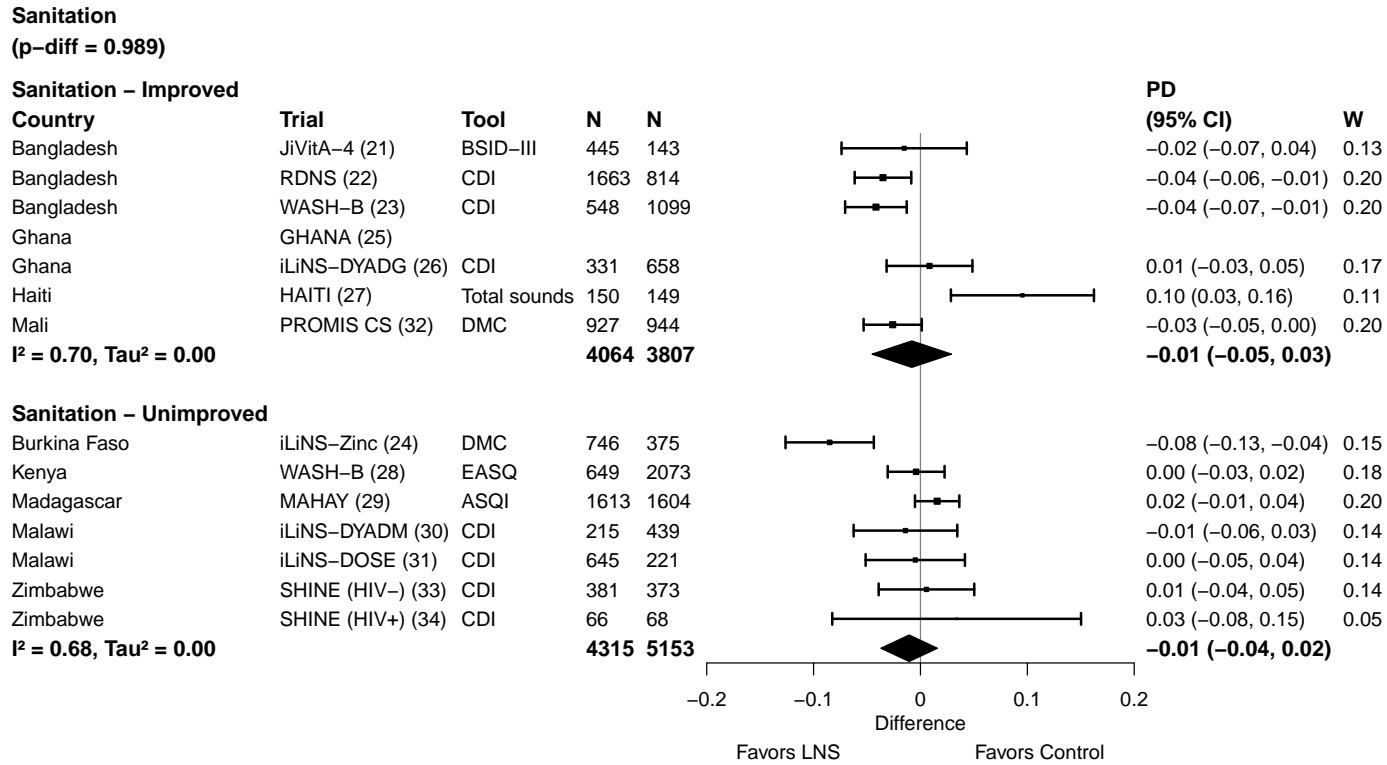

Supplemental figure 4C: Language lowest decile prevalence difference

4C7: Stratified by Supplement duration

Supplement duration  
(p-diff = 0.443)

Supplement duration – 12m or less

| Country      | Trial                                      | Tool         | N           | N           |
|--------------|--------------------------------------------|--------------|-------------|-------------|
| Bangladesh   | JiVitA-4 (21)                              | BSID-III     | 445         | 143         |
| Burkina Faso | iLiNS-Zinc (24)                            | DMC          | 746         | 375         |
| Ghana        | GHANA (25)                                 |              |             |             |
| Ghana        | iLiNS-DYADG (26)                           | CDI          | 331         | 658         |
| Haiti        | HAITI (27)                                 | Total sounds | 150         | 149         |
| Madagascar   | MAHAY (29)                                 | ASQI         | 1613        | 1604        |
| Malawi       | iLiNS-DYADM (30)                           | CDI          | 215         | 439         |
| Malawi       | iLiNS-DOSE (31)                            | CDI          | 645         | 221         |
| Zimbabwe     | SHINE <sup>1</sup> (HIV-) (33), LNS vs SOC | CDI          | 381         | 373         |
| Zimbabwe     | LNS+WSH vs WSH                             | CDI          | 436         | 408         |
| Zimbabwe     | SHINE <sup>1</sup> (HIV+) (34), LNS vs SOC | CDI          | 66          | 68          |
| Zimbabwe     | LNS+WSH vs WSH                             | CDI          | 99          | 79          |
|              |                                            |              | <b>5127</b> | <b>4517</b> |

I<sup>2</sup> = 0.72, Tau<sup>2</sup> = 0.00

Supplement duration – > 12m

|            |                |      |             |             |
|------------|----------------|------|-------------|-------------|
| Bangladesh | RDNS (22)      | CDI  | 1663        | 814         |
| Bangladesh | WASH-B (23)    | CDI  | 1109        | 3353        |
| Kenya      | WASH-B (28)    | EASQ | 1362        | 4745        |
| Mali       | PROMIS CS (32) | DMC  | 927         | 944         |
|            |                |      | <b>5061</b> | <b>9856</b> |

I<sup>2</sup> = 0.26, Tau<sup>2</sup> = 0.00

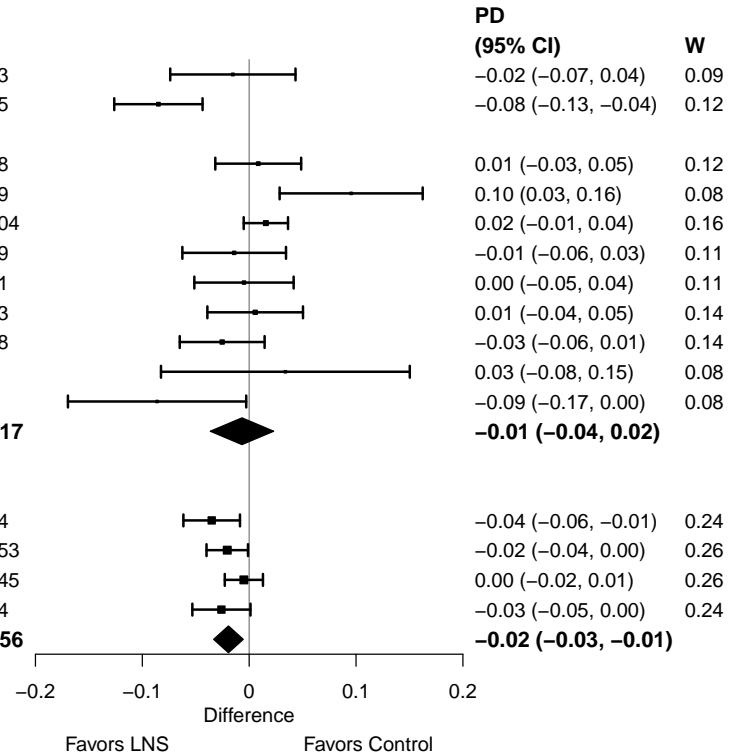

Supplemental figure 4C: Language lowest decile prevalence difference

4C8: Stratified by Frequency of contact

**Frequency of contact**  
(p-diff = 0.340)

**Frequency of contact – Monthly**

| Country    | Trial                                      | Tool         | N           | N           |
|------------|--------------------------------------------|--------------|-------------|-------------|
| Bangladesh | RDNS (22)                                  | CDI          | 1663        | 814         |
| Haiti      | HAITI (27)                                 | Total sounds | 150         | 149         |
| Kenya      | WASH-B (28)                                | EASQ         | 1362        | 4745        |
| Madagascar | MAHAY (29)                                 | ASQI         | 1613        | 1604        |
| Mali       | PROMIS CS (32)                             | DMC          | 927         | 944         |
| Zimbabwe   | SHINE <sup>1</sup> (HIV-) (33), LNS vs SOC | CDI          | 381         | 373         |
| Zimbabwe   | LNS+WSH vs WSH                             | CDI          | 436         | 408         |
| Zimbabwe   | SHINE <sup>1</sup> (HIV+) (34), LNS vs SOC | CDI          | 66          | 68          |
| Zimbabwe   | LNS+WSH vs WSH                             | CDI          | 99          | 79          |
|            |                                            |              | <b>6697</b> | <b>9184</b> |

**I<sup>2</sup> = 0.71, Tau<sup>2</sup> = 0.00**

**Frequency of contact – Weekly**

|              |                  |          |             |             |
|--------------|------------------|----------|-------------|-------------|
| Bangladesh   | JiVitA-4 (21)    | BSID-III | 445         | 143         |
| Bangladesh   | WASH-B (23)      | CDI      | 1109        | 3353        |
| Burkina Faso | iLiNS-Zinc (24)  | DMC      | 746         | 375         |
| Ghana        | GHANA (25)       |          |             |             |
| Ghana        | iLiNS-DYADG (26) | CDI      | 331         | 658         |
| Malawi       | iLiNS-DYADM (30) | CDI      | 215         | 439         |
| Malawi       | iLiNS-DOSE (31)  | CDI      | 645         | 221         |
|              |                  |          | <b>3491</b> | <b>5189</b> |

**I<sup>2</sup> = 0.58, Tau<sup>2</sup> = 0.00**

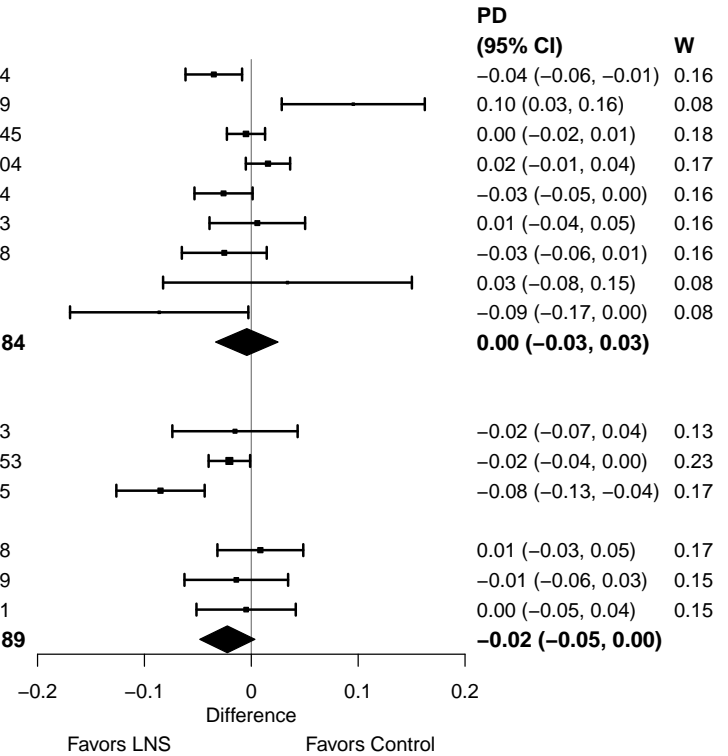

Supplemental figure 4C: Language lowest decile prevalence difference

4C9: Stratified by Average SQ-LNS compliance

**Average SQ-LNS compliance**  
(p-diff = 0.770)

**Average SQ-LNS compliance – Low**

| Country  | Trial                                      | Tool | N           | N           |  | PD<br>(95% CI)             | W    |
|----------|--------------------------------------------|------|-------------|-------------|--|----------------------------|------|
| Ghana    | iLiNS-DYADG (26)                           | CDI  | 331         | 658         |  | 0.01 (-0.03, 0.05)         | 0.17 |
| Malawi   | iLiNS-DYADM (30)                           | CDI  | 215         | 439         |  | -0.01 (-0.06, 0.03)        | 0.15 |
| Malawi   | iLiNS-DOSE (31)                            | CDI  | 645         | 221         |  | 0.00 (-0.05, 0.04)         | 0.16 |
| Mali     | PROMIS CS (32)                             | DMC  | 927         | 944         |  | -0.03 (-0.05, 0.00)        | 0.21 |
| Zimbabwe | SHINE <sup>1</sup> (HIV-) (33), LNS vs SOC | CDI  | 381         | 373         |  | 0.01 (-0.04, 0.05)         | 0.20 |
| Zimbabwe | LNS+WSH vs WSH                             | CDI  | 436         | 408         |  | -0.03 (-0.06, 0.01)        | 0.20 |
| Zimbabwe | SHINE <sup>1</sup> (HIV+) (34), LNS vs SOC | CDI  | 66          | 68          |  | 0.03 (-0.08, 0.15)         | 0.11 |
| Zimbabwe | LNS+WSH vs WSH                             | CDI  | 99          | 79          |  | -0.09 (-0.17, 0.00)        | 0.11 |
|          |                                            |      | <b>3100</b> | <b>3190</b> |  | <b>-0.01 (-0.03, 0.00)</b> |      |

**I<sup>2</sup> = 0.00, Tau<sup>2</sup> = 0.00**

**Average SQ-LNS compliance – High**

|              |                 |              |             |             |  |                            |      |
|--------------|-----------------|--------------|-------------|-------------|--|----------------------------|------|
| Bangladesh   | JiVitA-4 (21)   | BSID-III     | 445         | 143         |  | -0.02 (-0.07, 0.04)        | 0.12 |
| Bangladesh   | RDNS (22)       | CDI          | 1663        | 814         |  | -0.04 (-0.06, -0.01)       | 0.20 |
| Bangladesh   | WASH-B (23)     | CDI          | 1109        | 3353        |  | -0.02 (-0.04, 0.00)        | 0.21 |
| Burkina Faso | iLiNS-Zinc (24) | DMC          | 746         | 375         |  | -0.08 (-0.13, -0.04)       | 0.16 |
| Ghana        | GHANA (25)      |              |             |             |  |                            |      |
| Haiti        | HAITI (27)      | Total sounds | 150         | 149         |  | 0.10 (0.03, 0.16)          | 0.10 |
| Kenya        | WASH-B (28)     | EASQ         | 1362        | 4745        |  | 0.00 (-0.02, 0.01)         | 0.22 |
|              |                 |              | <b>5475</b> | <b>9579</b> |  | <b>-0.01 (-0.06, 0.03)</b> |      |

**I<sup>2</sup> = 0.80, Tau<sup>2</sup> = 0.00**

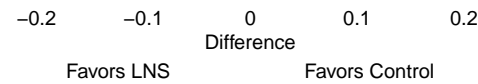

## Supplemental figure 4D: Mean difference in social-emotional z-score

4D1: Stratified by Geographic region (insufficient comparisons)



Supplemental figure 4D: Mean difference in social-emotional z-score

4D2: Stratified by Stunting burden

**Stunting burden**  
( $p$ -diff = 0.066)

**Stunting burden – Less than 35%**

| Country                                             | Trial            | Tool | N    | N    | MD (95% CI)               | W    |
|-----------------------------------------------------|------------------|------|------|------|---------------------------|------|
| Ghana                                               | GHANA (25)       |      |      |      |                           |      |
| Ghana                                               | iLiNS-DYADG (26) | PSED | 332  | 657  | 0.01 (-0.12, 0.14)        | 0.32 |
| Haiti                                               | HAITI (27)       |      |      |      |                           |      |
| Kenya                                               | WASH-B (28)      | EASQ | 1362 | 4745 | 0.01 (-0.05, 0.08)        | 0.41 |
| Malawi                                              | iLiNS-DYADM (30) | PSED | 215  | 438  | 0.01 (-0.15, 0.18)        | 0.28 |
| <b><math>I^2 = 0.00, \text{Tau}^2 = 0.00</math></b> |                  |      |      |      | <b>0.01 (-0.04, 0.07)</b> |      |

**Stunting burden – More than 35%**

|                                                     |                                            |      |      |      |                          |      |
|-----------------------------------------------------|--------------------------------------------|------|------|------|--------------------------|------|
| Bangladesh                                          | JiVitA-4 (21)                              |      |      |      |                          |      |
| Bangladesh                                          | RDNS (22)                                  | DMC  | 1657 | 815  | 0.06 (-0.04, 0.16)       | 0.15 |
| Bangladesh                                          | WASH-B (23)                                | EASQ | 1066 | 3266 | 0.12 (0.05, 0.20)        | 0.16 |
| Burkina Faso                                        | iLiNS-Zinc (24)                            | DMC  | 746  | 375  | 0.36 (0.18, 0.53)        | 0.11 |
| Madagascar                                          | MAHAY (29)                                 | ASQI | 1613 | 1604 | -0.07 (-0.26, 0.11)      | 0.10 |
| Malawi                                              | iLiNS-DOSE (31)                            | PSED | 644  | 221  | 0.03 (-0.12, 0.18)       | 0.12 |
| Mali                                                | PROMIS CS (32)                             | DMC  | 927  | 944  | 0.15 (-0.02, 0.31)       | 0.11 |
| Zimbabwe                                            | SHINE <sup>1</sup> (HIV-) (33), LNS vs SOC | MDAT | 395  | 382  | 0.07 (-0.07, 0.21)       | 0.15 |
| Zimbabwe                                            | LNS+WSH vs WSH                             | MDAT | 446  | 417  | 0.17 (0.02, 0.31)        | 0.15 |
| Zimbabwe                                            | SHINE <sup>1</sup> (HIV+) (34), LNS vs SOC | MDAT | 67   | 68   | 0.24 (0.00, 0.48)        | 0.10 |
| Zimbabwe                                            | LNS+WSH vs WSH                             | MDAT | 103  | 83   | 0.44 (0.14, 0.73)        | 0.10 |
| <b><math>I^2 = 0.65, \text{Tau}^2 = 0.01</math></b> |                                            |      |      |      | <b>0.13 (0.04, 0.23)</b> |      |

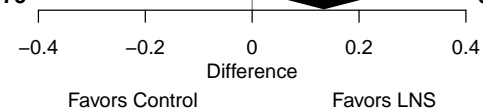

Supplemental figure 4D: Mean difference in social-emotional z-score

4D3: Stratified by Malaria prevalence

**Malaria prevalence**  
(p-diff = 0.863)

**Malaria prevalence – Less than 10%**

| Country    | Trial                                      | Tool | N           | N            | MD (95% CI)               | W    |
|------------|--------------------------------------------|------|-------------|--------------|---------------------------|------|
| Bangladesh | JiVitA-4 (21)                              |      |             |              |                           |      |
| Bangladesh | RDNS (22)                                  | DMC  | 1657        | 815          | 0.06 (-0.04, 0.16)        | 0.18 |
| Bangladesh | WASH-B (23)                                | EASQ | 1066        | 3266         | 0.12 (0.05, 0.20)         | 0.20 |
| Haiti      | HAITI (27)                                 |      |             |              |                           |      |
| Kenya      | WASH-B (28)                                | EASQ | 1362        | 4745         | 0.01 (-0.05, 0.08)        | 0.20 |
| Madagascar | MAHAY (29)                                 | ASQI | 1613        | 1604         | -0.07 (-0.26, 0.11)       | 0.13 |
| Zimbabwe   | SHINE <sup>1</sup> (HIV-) (33), LNS vs SOC | MDAT | 395         | 382          | 0.07 (-0.07, 0.21)        | 0.18 |
| Zimbabwe   | LNS+WSH vs WSH                             | MDAT | 446         | 417          | 0.17 (0.02, 0.31)         | 0.18 |
| Zimbabwe   | SHINE <sup>1</sup> (HIV+) (34), LNS vs SOC | MDAT | 67          | 68           | 0.24 (0.00, 0.48)         | 0.12 |
| Zimbabwe   | LNS+WSH vs WSH                             | MDAT | 103         | 83           | 0.44 (0.14, 0.73)         | 0.12 |
|            |                                            |      | <b>6709</b> | <b>11380</b> | <b>0.09 (-0.01, 0.20)</b> |      |

**I<sup>2</sup> = 0.70, Tau<sup>2</sup> = 0.01**

**Malaria prevalence – At least 10%**

|              |                  |      |             |             |                           |      |
|--------------|------------------|------|-------------|-------------|---------------------------|------|
| Burkina Faso | iLiNS-Zinc (24)  | DMC  | 746         | 375         | 0.36 (0.18, 0.53)         | 0.19 |
| Ghana        | GHANA (25)       |      |             |             |                           |      |
| Ghana        | iLiNS-DYADG (26) | PSED | 332         | 657         | 0.01 (-0.12, 0.14)        | 0.22 |
| Malawi       | iLiNS-DYADM (30) | PSED | 215         | 438         | 0.01 (-0.15, 0.18)        | 0.19 |
| Malawi       | iLiNS-DOSE (31)  | PSED | 644         | 221         | 0.03 (-0.12, 0.18)        | 0.20 |
| Mali         | PROMIS CS (32)   | DMC  | 927         | 944         | 0.15 (-0.02, 0.31)        | 0.19 |
|              |                  |      | <b>2864</b> | <b>2635</b> | <b>0.11 (-0.02, 0.23)</b> |      |

**I<sup>2</sup> = 0.68, Tau<sup>2</sup> = 0.01**

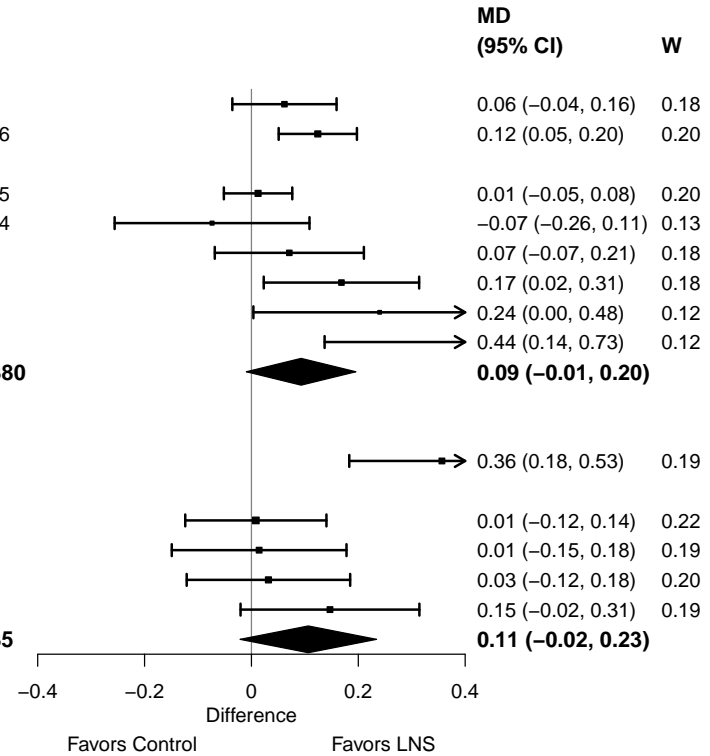

Supplemental figure 4D: Mean difference in social-emotional z-score

4D4: Stratified by Anemia prevalence

**Anemia prevalence**  
(p-diff = 0.496)

**Anemia prevalence – High**

**Country**

| Trial                           | Tool | N           | N           |
|---------------------------------|------|-------------|-------------|
| Burkina Faso<br>iLiNS-Zinc (24) | DMC  | 746         | 375         |
| Ghana<br>GHANA (25)             |      |             |             |
| Haiti<br>HAITI (27)             |      |             |             |
| Malawi<br>iLiNS-DYADM (30)      | PSED | 215         | 438         |
| Malawi<br>iLiNS-DOSE (31)       | PSED | 644         | 221         |
| Mali<br>PROMIS CS (32)          | DMC  | 927         | 944         |
|                                 |      | <b>2532</b> | <b>1978</b> |

**I<sup>2</sup> = 0.70, Tau<sup>2</sup> = 0.02**

**Anemia prevalence – Moderate**

|                                                        |      |             |              |
|--------------------------------------------------------|------|-------------|--------------|
| Bangladesh<br>JiVitA-4 (21)                            |      |             |              |
| Bangladesh<br>RDNS (22)                                | DMC  | 1657        | 815          |
| Bangladesh<br>WASH-B (23)                              | EASQ | 1066        | 3266         |
| Ghana<br>iLiNS-DYADG (26)                              | PSED | 332         | 657          |
| Kenya<br>WASH-B (28)                                   | EASQ | 1362        | 4745         |
| Madagascar<br>MAHAY (29)                               | ASQI | 1613        | 1604         |
| Zimbabwe<br>SHINE <sup>1</sup> (HIV-) (33), LNS vs SOC | MDAT | 395         | 382          |
| Zimbabwe<br>LNS+WSH vs WSH                             | MDAT | 446         | 417          |
| Zimbabwe<br>SHINE <sup>1</sup> (HIV+) (34), LNS vs SOC | MDAT | 67          | 68           |
| Zimbabwe<br>LNS+WSH vs WSH                             | MDAT | 103         | 83           |
|                                                        |      | <b>7041</b> | <b>12037</b> |

**I<sup>2</sup> = 0.66, Tau<sup>2</sup> = 0.01**

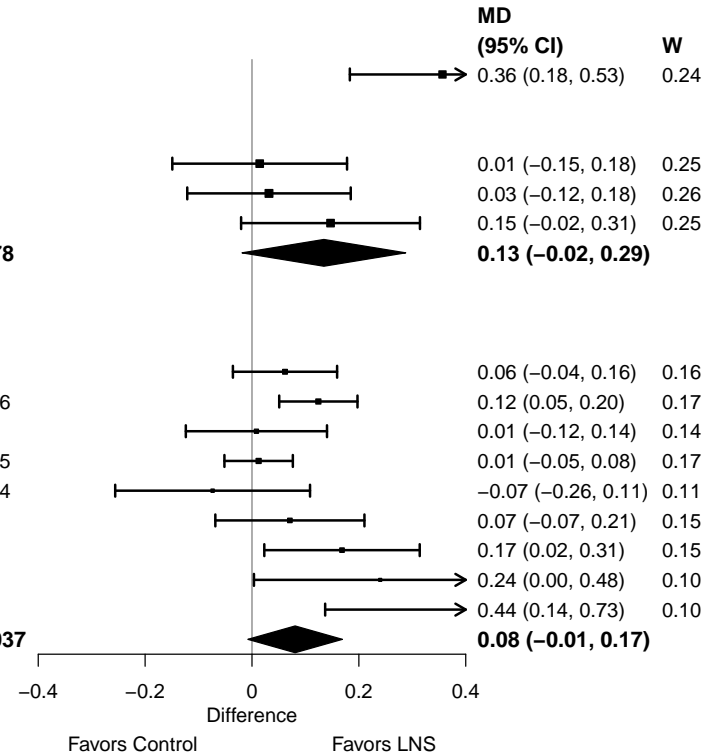

Supplemental figure 4D: Mean difference in social-emotional z-score

4D5: Stratified by Source water quality

**Source water quality**  
( $p$ -diff = 0.681)

**Source water quality – Improved**

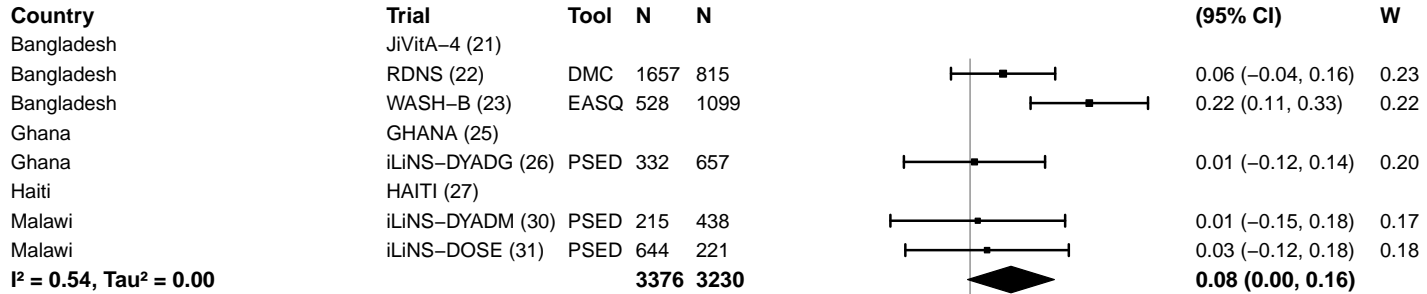

**Source water quality – Unimproved**

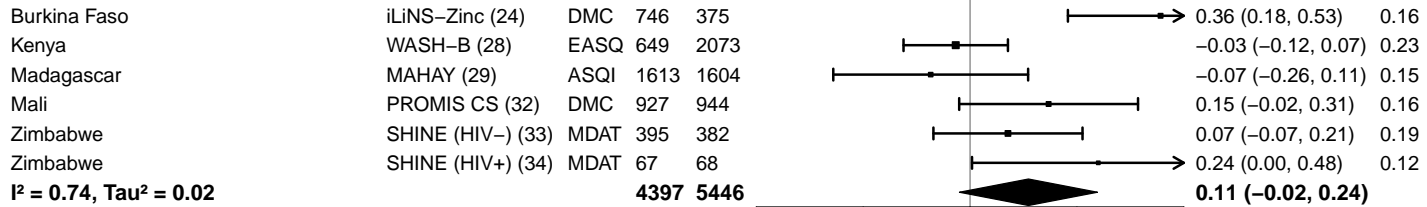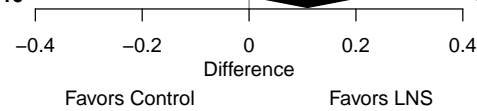

Supplemental figure 4D: Mean difference in social-emotional z-score

4D6: Stratified by Sanitation

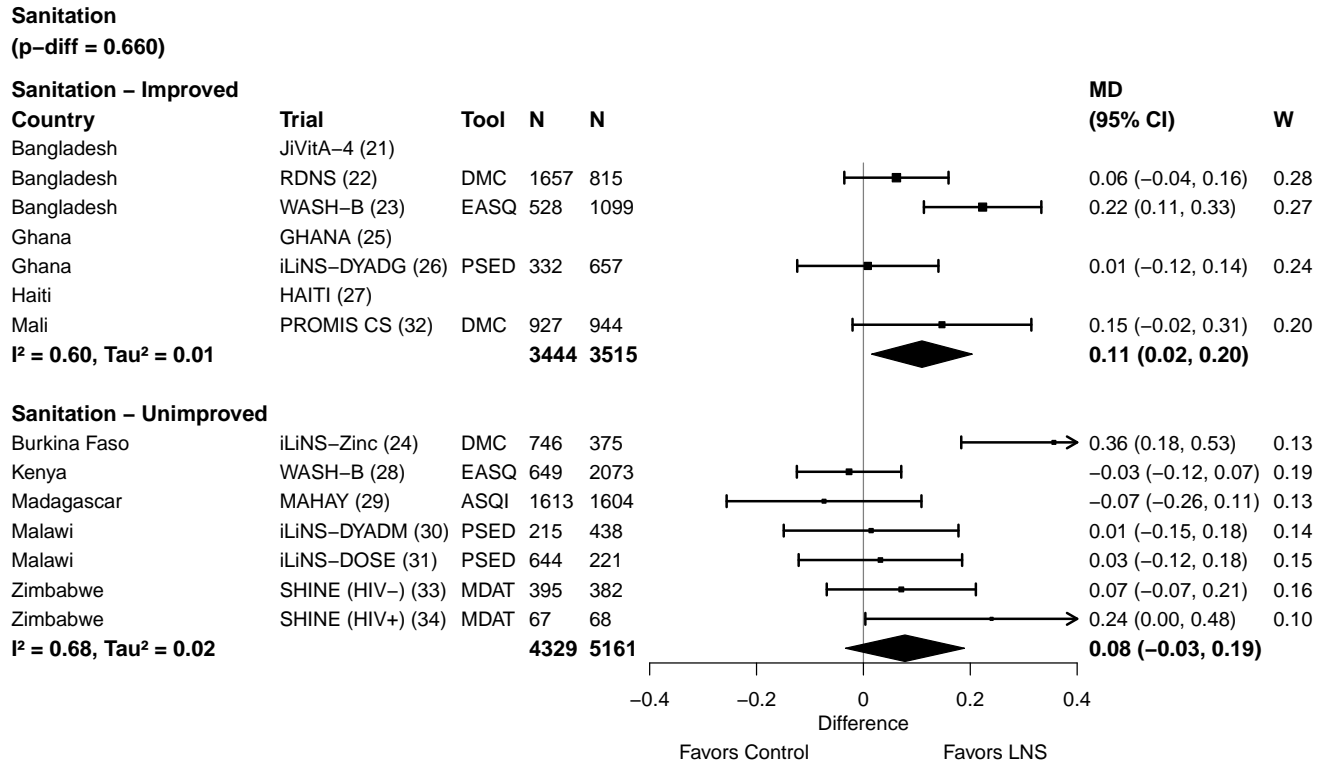

Supplemental figure 4D: Mean difference in social-emotional z-score

4D7: Stratified by Supplement duration

**Supplement duration**  
(p-diff = 0.702)

**Supplement duration – 12m or less**

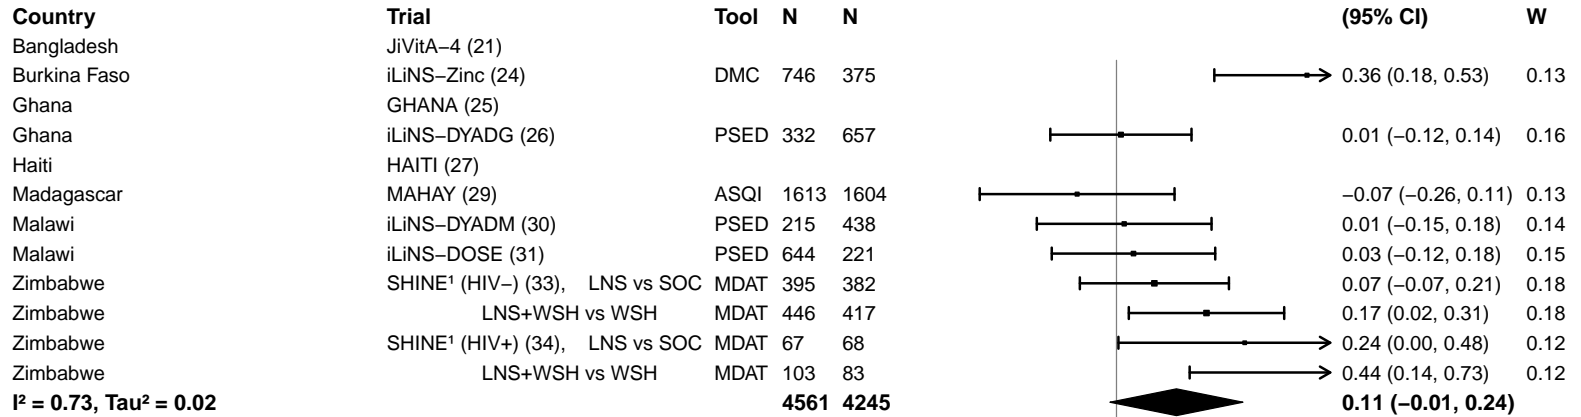

**Supplement duration – > 12m**

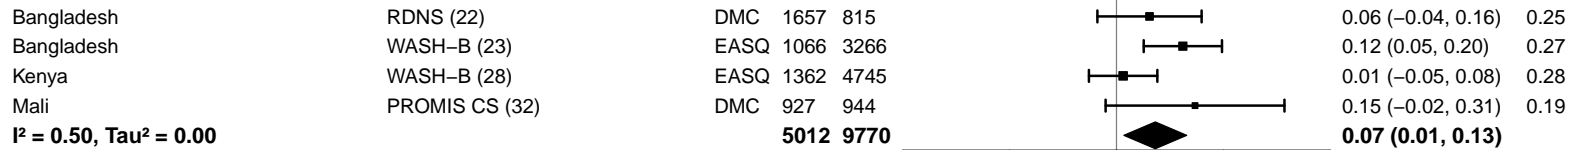

Supplemental figure 4D: Mean difference in social-emotional z-score

4D8: Stratified by Frequency of contact

**Frequency of contact**  
(p-diff = 0.897)

**Frequency of contact – Monthly**

| Country    | Trial                                      | Tool | N           | N           |
|------------|--------------------------------------------|------|-------------|-------------|
| Bangladesh | RDNS (22)                                  | DMC  | 1657        | 815         |
| Haiti      | HAITI (27)                                 |      |             |             |
| Kenya      | WASH-B (28)                                | EASQ | 1362        | 4745        |
| Madagascar | MAHAY (29)                                 | ASQI | 1613        | 1604        |
| Mali       | PROMIS CS (32)                             | DMC  | 927         | 944         |
| Zimbabwe   | SHINE <sup>1</sup> (HIV-) (33), LNS vs SOC | MDAT | 395         | 382         |
| Zimbabwe   | LNS+WSH vs WSH                             | MDAT | 446         | 417         |
| Zimbabwe   | SHINE <sup>1</sup> (HIV+) (34), LNS vs SOC | MDAT | 67          | 68          |
| Zimbabwe   | LNS+WSH vs WSH                             | MDAT | 103         | 83          |
|            |                                            |      | <b>6570</b> | <b>9058</b> |

**I<sup>2</sup> = 0.68, Tau<sup>2</sup> = 0.01**

**Frequency of contact – Weekly**

|              |                  |      |             |             |
|--------------|------------------|------|-------------|-------------|
| Bangladesh   | JiVitA-4 (21)    |      |             |             |
| Bangladesh   | WASH-B (23)      | EASQ | 1066        | 3266        |
| Burkina Faso | iLiNS-Zinc (24)  | DMC  | 746         | 375         |
| Ghana        | GHANA (25)       |      |             |             |
| Ghana        | iLiNS-DYADG (26) | PSED | 332         | 657         |
| Malawi       | iLiNS-DYADM (30) | PSED | 215         | 438         |
| Malawi       | iLiNS-DOSE (31)  | PSED | 644         | 221         |
|              |                  |      | <b>3003</b> | <b>4957</b> |

**I<sup>2</sup> = 0.68, Tau<sup>2</sup> = 0.01**

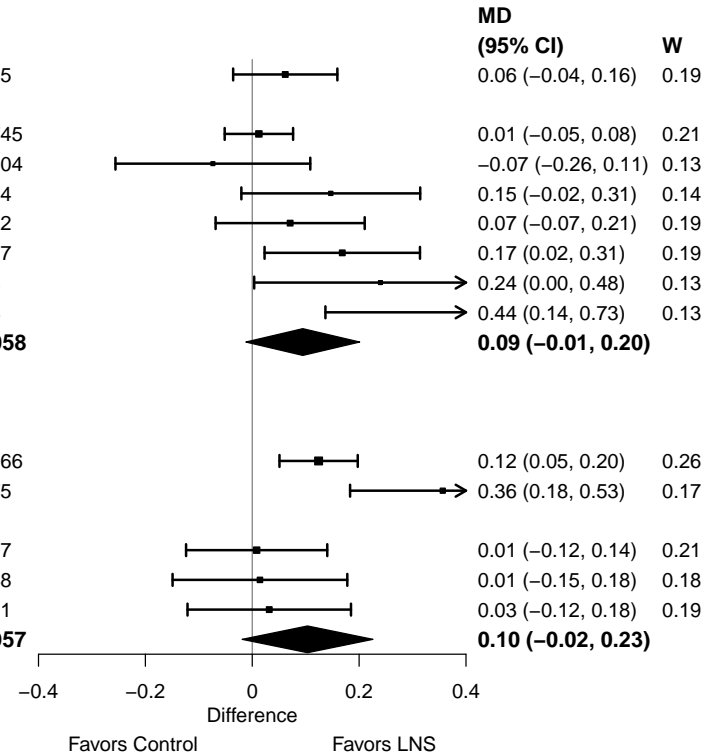

Supplemental figure 4D: Mean difference in social-emotional z-score

4D9: Stratified by Average SQ-LNS compliance

Average SQ-LNS compliance

(p-diff = 0.863)

Average SQ-LNS compliance – Low

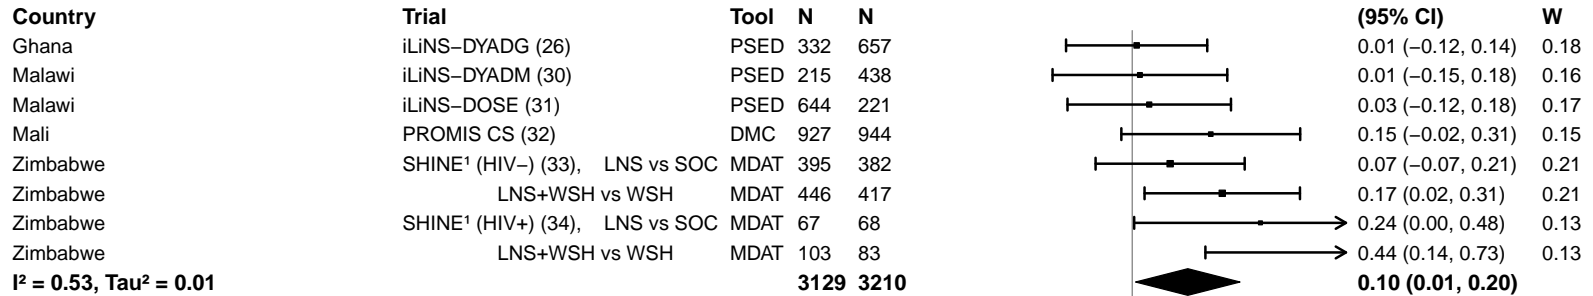

Average SQ-LNS compliance – High

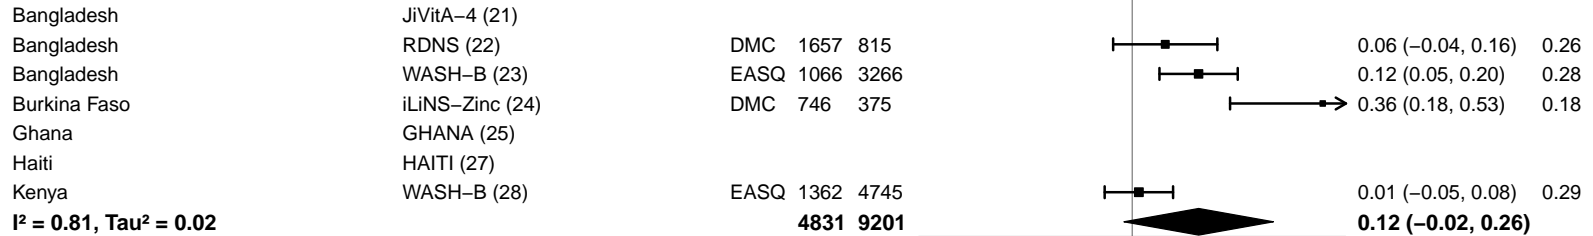

-0.4 -0.2 0 0.2 0.4  
Difference  
Favors Control Favors LNS



## Supplemental figure 4E: Social-emotional lowest decile prevalence ratio

4E1: Stratified by Geographic region (insufficient comparisons)

Supplemental figure 4E: Social-emotional lowest decile prevalence ratio

4E2: Stratified by Stunting burden

**Stunting burden**  
(p-diff = 0.228)

**Stunting burden – Less than 35%**

| Country                                             | Trial            | Tool | N    | N    | PR (95% CI)              | W    |
|-----------------------------------------------------|------------------|------|------|------|--------------------------|------|
| Ghana                                               | GHANA (25)       |      |      |      |                          |      |
| Ghana                                               | iLiNS-DYADG (26) | PSED | 332  | 657  | 0.99 (0.67, 1.47)        | 0.31 |
| Haiti                                               | HAITI (27)       |      |      |      |                          |      |
| Kenya                                               | WASH-B (28)      | EASQ | 1362 | 4745 | 0.87 (0.71, 1.08)        | 0.44 |
| Malawi                                              | iLiNS-DYADM (30) | PSED | 215  | 438  | 1.00 (0.61, 1.61)        | 0.26 |
| <b>I<sup>2</sup> = 0.00, Tau<sup>2</sup> = 0.00</b> |                  |      |      |      | <b>0.91 (0.77, 1.08)</b> |      |

**Stunting burden – More than 35%**

|                                                     |                                            |      |      |      |                          |      |
|-----------------------------------------------------|--------------------------------------------|------|------|------|--------------------------|------|
| Bangladesh                                          | JiVitA-4 (21)                              |      |      |      |                          |      |
| Bangladesh                                          | RDNS (22)                                  | DMC  | 1657 | 815  | 0.84 (0.66, 1.07)        | 0.16 |
| Bangladesh                                          | WASH-B (23)                                | EASQ | 1066 | 3266 | 0.81 (0.64, 1.03)        | 0.16 |
| Burkina Faso                                        | iLiNS-Zinc (24)                            | DMC  | 746  | 375  | 0.41 (0.28, 0.62)        | 0.12 |
| Madagascar                                          | MAHAY (29)                                 | ASQI | 1613 | 1604 | 1.15 (0.75, 1.78)        | 0.11 |
| Malawi                                              | iLiNS-DOSE (31)                            | PSED | 644  | 221  | 1.08 (0.68, 1.72)        | 0.10 |
| Mali                                                | PROMIS CS (32)                             | DMC  | 927  | 944  | 0.77 (0.56, 1.07)        | 0.14 |
| Zimbabwe                                            | SHINE <sup>1</sup> (HIV-) (33), LNS vs SOC | MDAT | 395  | 382  | 0.86 (0.56, 1.33)        | 0.14 |
| Zimbabwe                                            | LNS+WSH vs WSH                             | MDAT | 446  | 417  | 0.62 (0.41, 0.93)        | 0.14 |
| Zimbabwe                                            | SHINE <sup>1</sup> (HIV+) (34), LNS vs SOC | MDAT | 67   | 68   | 0.68 (0.22, 2.04)        | 0.07 |
| Zimbabwe                                            | LNS+WSH vs WSH                             | MDAT | 103  | 83   | 0.33 (0.15, 0.76)        | 0.07 |
| <b>I<sup>2</sup> = 0.63, Tau<sup>2</sup> = 0.08</b> |                                            |      |      |      | <b>0.75 (0.59, 0.95)</b> |      |

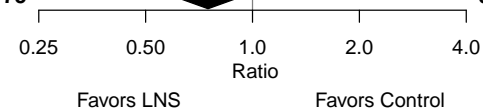

Supplemental figure 4E: Social-emotional lowest decile prevalence ratio

4E3: Stratified by Malaria prevalence

**Malaria prevalence**

(p-diff = 0.902)

**Malaria prevalence – Less than 10%**

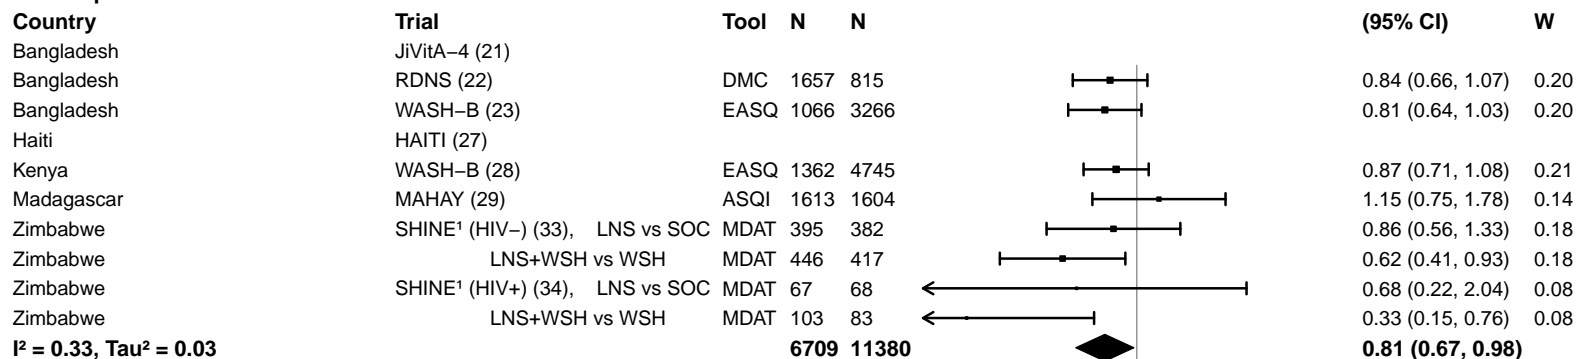

**Malaria prevalence – At least 10%**

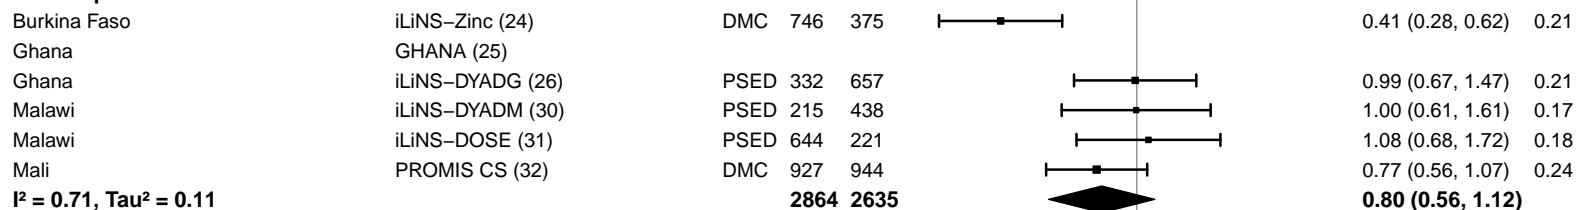

Supplemental figure 4E: Social-emotional lowest decile prevalence ratio

4E4: Stratified by Anemia prevalence

**Anemia prevalence**  
(p-diff = 0.534)

**Anemia prevalence – High**

**Country**

Burkina Faso  
Ghana  
Haiti  
Malawi  
Malawi  
Mali

**Trial**

iLiNS–Zinc (24)  
GHANA (25)  
HAITI (27)  
iLiNS–DYADM (30)  
iLiNS–DOSE (31)  
PROMIS CS (32)

**Tool N N**  
DMC 746 375  
PSED 215 438  
PSED 644 221  
DMC 927 944  
**2532 1978**

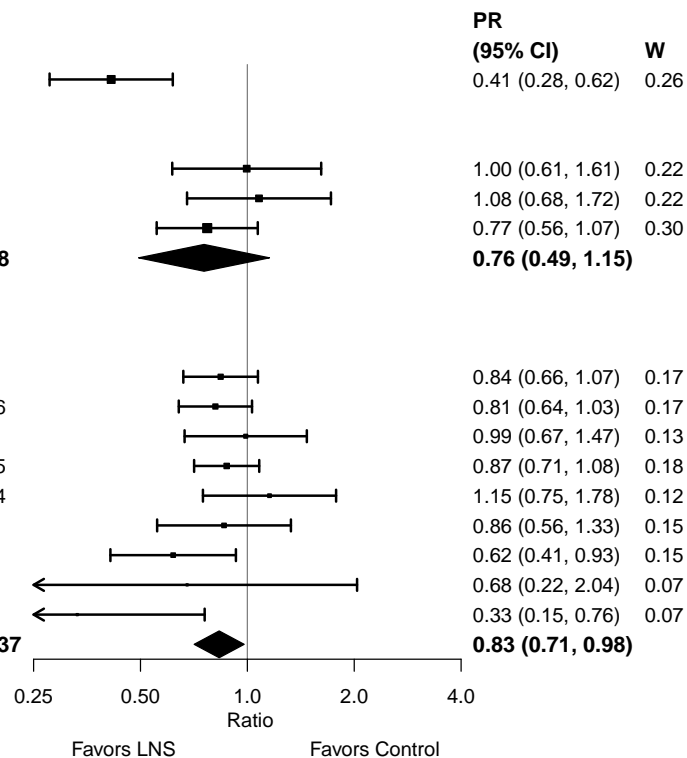

**I<sup>2</sup> = 0.75, Tau<sup>2</sup> = 0.14**

**Anemia prevalence – Moderate**

Bangladesh  
Bangladesh  
Bangladesh  
Ghana  
Kenya  
Madagascar  
Zimbabwe  
Zimbabwe  
Zimbabwe  
Zimbabwe

JiVitA–4 (21)  
RDNS (22)  
WASH–B (23)  
iLiNS–DYADG (26)  
WASH–B (28)  
MAHAY (29)  
SHINE<sup>1</sup> (HIV–) (33), LNS vs SOC  
LNS+WSH vs WSH  
SHINE<sup>1</sup> (HIV+) (34), LNS vs SOC  
LNS+WSH vs WSH

**Tool N N**  
DMC 1657 815  
EASQ 1066 3266  
PSED 332 657  
EASQ 1362 4745  
ASQI 1613 1604  
MDAT 395 382  
MDAT 446 417  
MDAT 67 68  
MDAT 103 83  
**7041 12037**

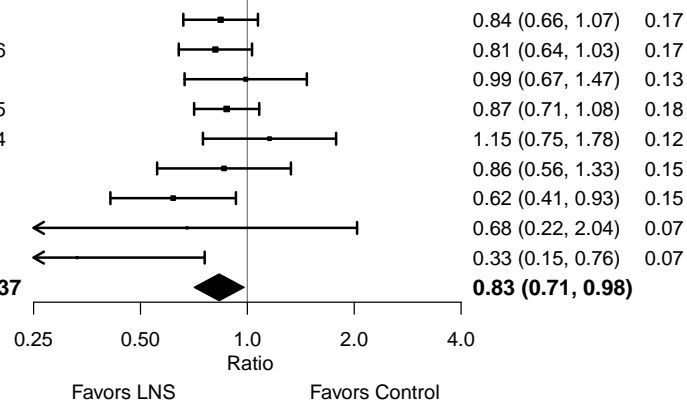

**I<sup>2</sup> = 0.27, Tau<sup>2</sup> = 0.02**

Supplemental figure 4E: Social-emotional lowest decile prevalence ratio

4E5: Stratified by Source water quality

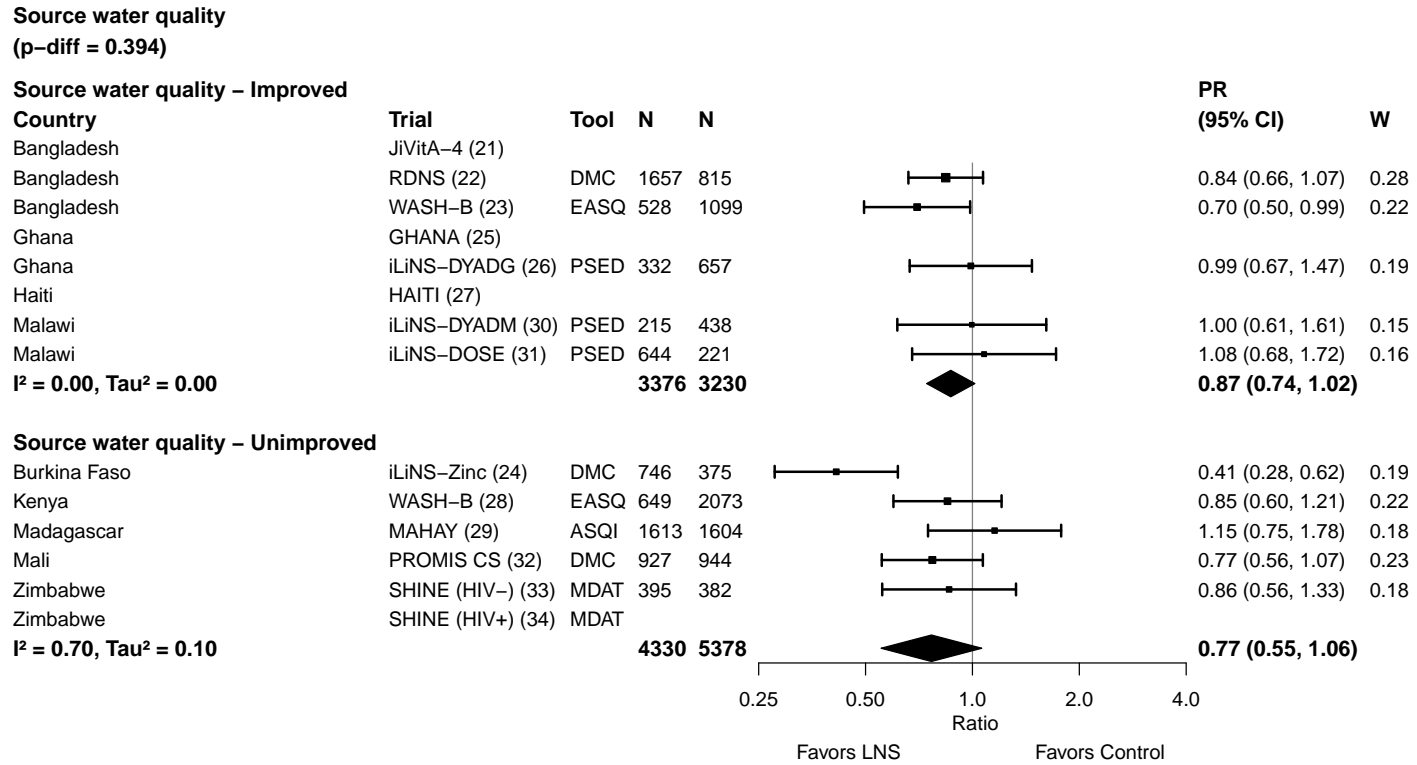

Supplemental figure 4E: Social-emotional lowest decile prevalence ratio

4E6: Stratified by Sanitation

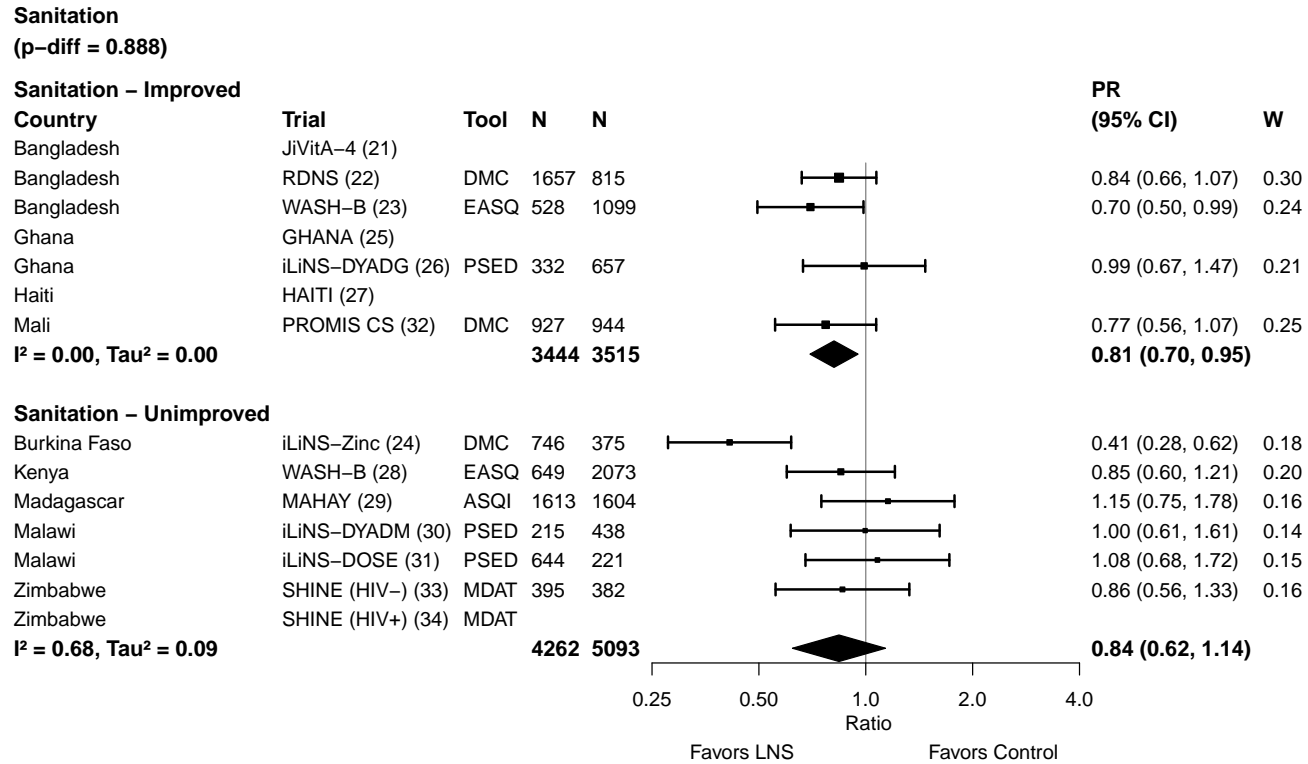

Supplemental figure 4E: Social-emotional lowest decile prevalence ratio

4E7: Stratified by Supplement duration

**Supplement duration**  
(p-diff = 0.731)

**Supplement duration – 12m or less**

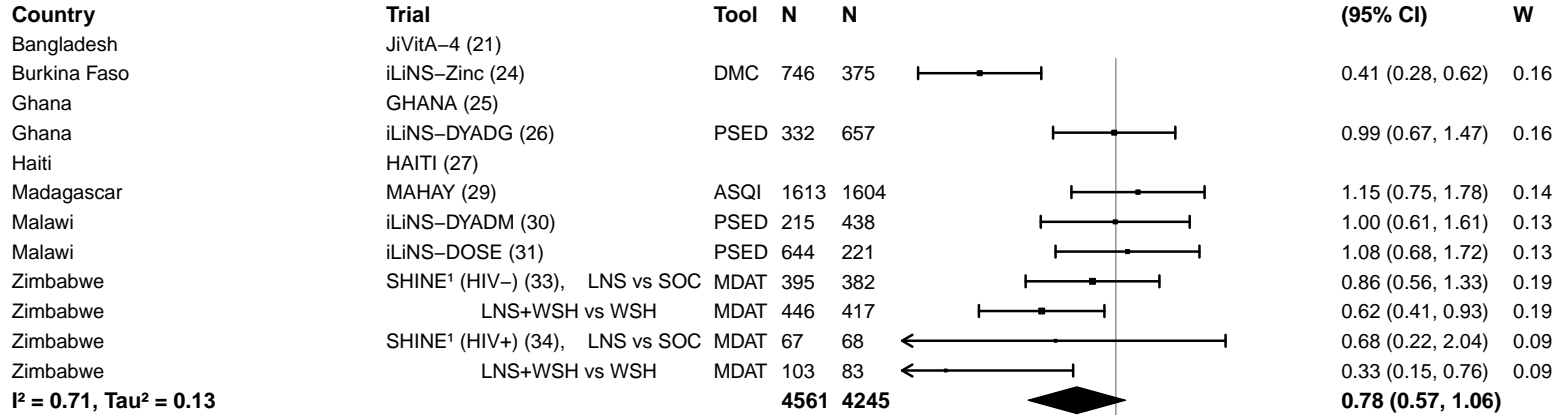

**Supplement duration – > 12m**

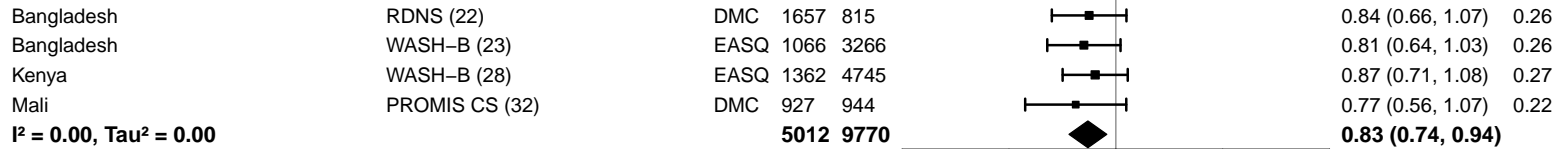

Supplemental figure 4E: Social-emotional lowest decile prevalence ratio

4E8: Stratified by Frequency of contact

**Frequency of contact**  
(p-diff = 0.991)

**Frequency of contact – Monthly**

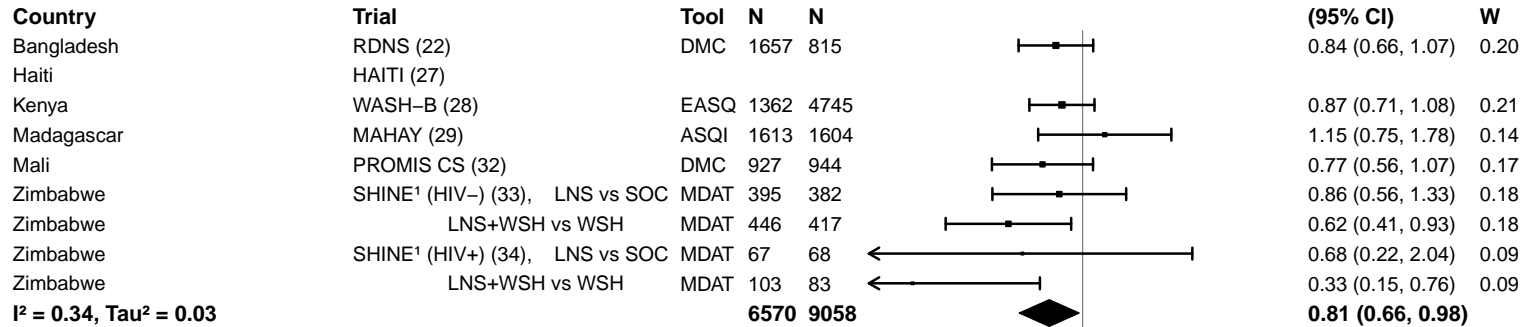

**Frequency of contact – Weekly**

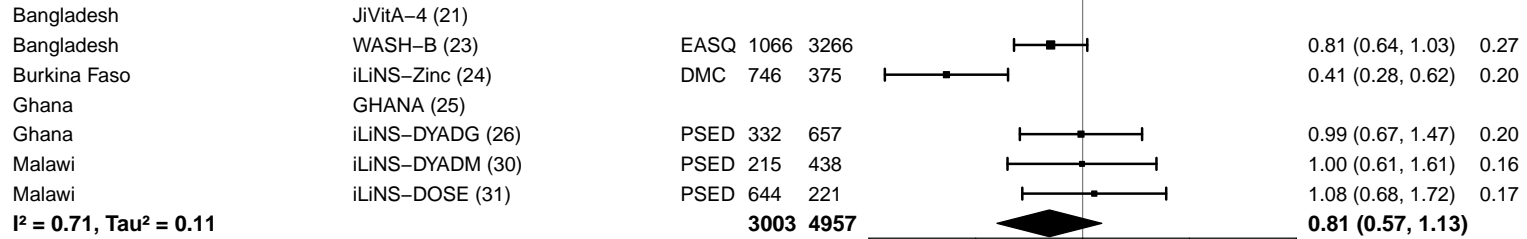



Supplemental figure 4E: Social-emotional lowest decile prevalence ratio

4E9: Stratified by Average SQ-LNS compliance

**Average SQ-LNS compliance**  
(p-diff = 0.575)

**Average SQ-LNS compliance – Low**

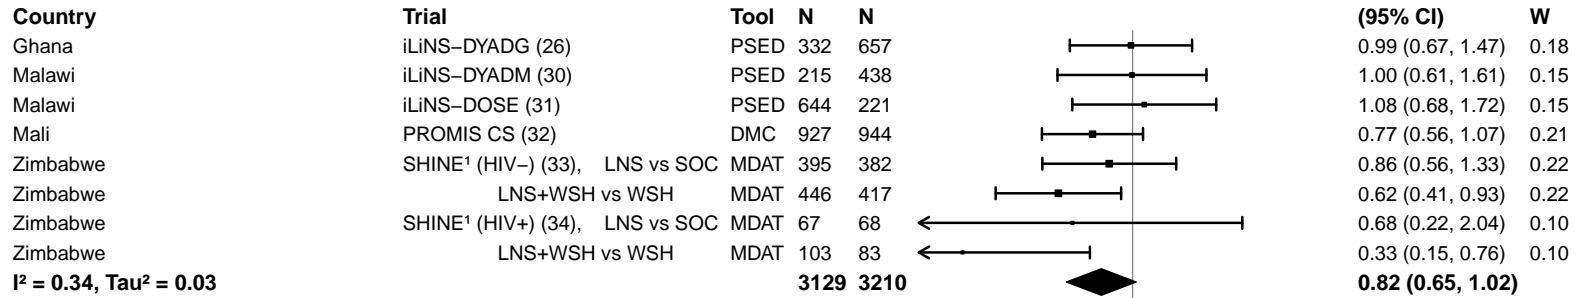

**Average SQ-LNS compliance – High**

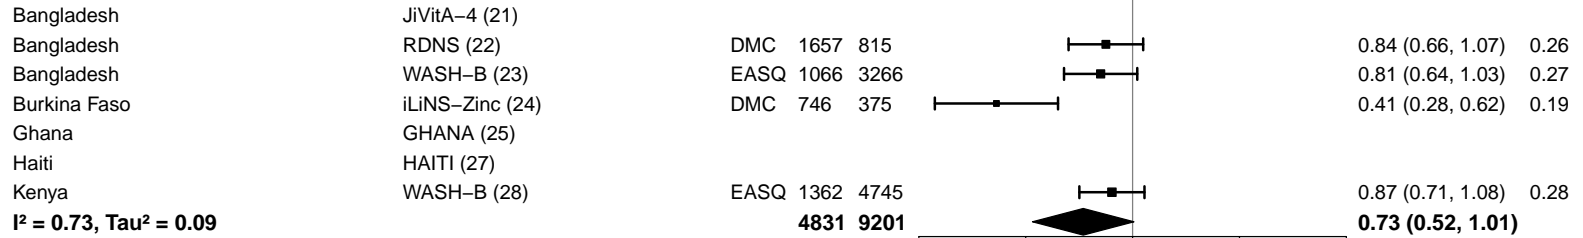

0.25 0.50 1.0 2.0 4.0  
Ratio  
Favors LNS Favors Control

**Supplemental figure 4F: Social-emotional lowest decile prevalence difference**  
**4F1: Stratified by Geographic region (insufficient comparisons)**

Supplemental figure 4F: Social-emotional lowest decile prevalence difference

4F2: Stratified by Stunting burden

**Stunting burden**

( $p$ -diff = 0.324)

**Stunting burden – Less than 35%**

| Country | Trial            | Tool | N           | N           | PD (95% CI)                | W    |
|---------|------------------|------|-------------|-------------|----------------------------|------|
| Ghana   | GHANA (25)       |      |             |             |                            |      |
| Ghana   | iLiNS-DYADG (26) | PSED | 332         | 657         | 0.00 (-0.04, 0.04)         | 0.31 |
| Haiti   | HAITI (27)       |      |             |             |                            |      |
| Kenya   | WASH-B (28)      | EASQ | 1362        | 4745        | -0.01 (-0.03, 0.00)        | 0.43 |
| Malawi  | iLiNS-DYADM (30) | PSED | 215         | 438         | 0.00 (-0.05, 0.05)         | 0.26 |
|         |                  |      | <b>1909</b> | <b>5840</b> | <b>-0.01 (-0.03, 0.01)</b> |      |

**Stunting burden – More than 35%**

|              |                                            |      |             |             |                            |      |
|--------------|--------------------------------------------|------|-------------|-------------|----------------------------|------|
| Bangladesh   | JiVitA-4 (21)                              |      |             |             |                            |      |
| Bangladesh   | RDNS (22)                                  | DMC  | 1657        | 815         | -0.02 (-0.04, 0.01)        | 0.14 |
| Bangladesh   | WASH-B (23)                                | EASQ | 1066        | 3266        | -0.02 (-0.04, 0.00)        | 0.15 |
| Burkina Faso | iLiNS-Zinc (24)                            | DMC  | 746         | 375         | -0.10 (-0.14, -0.06)       | 0.11 |
| Madagascar   | MAHAY (29)                                 | ASQI | 1613        | 1604        | 0.01 (-0.01, 0.04)         | 0.15 |
| Malawi       | iLiNS-DOSE (31)                            | PSED | 644         | 221         | 0.01 (-0.04, 0.05)         | 0.10 |
| Mali         | PROMIS CS (32)                             | DMC  | 927         | 944         | -0.03 (-0.05, 0.00)        | 0.14 |
| Zimbabwe     | SHINE <sup>1</sup> (HIV-) (33), LNS vs SOC | MDAT | 395         | 382         | -0.01 (-0.05, 0.03)        | 0.13 |
| Zimbabwe     | LNS+WSH vs WSH                             | MDAT | 446         | 417         | -0.05 (-0.10, -0.01)       | 0.13 |
| Zimbabwe     | SHINE <sup>1</sup> (HIV+) (34), LNS vs SOC | MDAT | 67          | 68          | -0.03 (-0.12, 0.06)        | 0.07 |
| Zimbabwe     | LNS+WSH vs WSH                             | MDAT | 103         | 83          | -0.14 (-0.24, -0.04)       | 0.07 |
|              |                                            |      | <b>7664</b> | <b>8175</b> | <b>-0.03 (-0.05, 0.00)</b> |      |

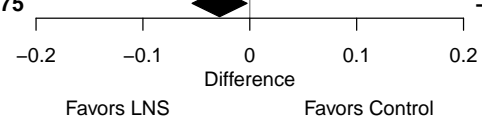

Supplemental figure 4F: Social-emotional lowest decile prevalence difference

4F3: Stratified by Malaria prevalence

**Malaria prevalence**  
(p-diff = 0.802)

**Malaria prevalence – Less than 10%**

| Country                                             | Trial                                      | Tool | N           | N            | PD (95% CI)                | W    |
|-----------------------------------------------------|--------------------------------------------|------|-------------|--------------|----------------------------|------|
| Bangladesh                                          | JiVitA-4 (21)                              |      |             |              |                            |      |
| Bangladesh                                          | RDNS (22)                                  | DMC  | 1657        | 815          | -0.02 (-0.04, 0.01)        | 0.18 |
| Bangladesh                                          | WASH-B (23)                                | EASQ | 1066        | 3266         | -0.02 (-0.04, 0.00)        | 0.19 |
| Haiti                                               | HAITI (27)                                 |      |             |              |                            |      |
| Kenya                                               | WASH-B (28)                                | EASQ | 1362        | 4745         | -0.01 (-0.03, 0.00)        | 0.20 |
| Madagascar                                          | MAHAY (29)                                 | ASQI | 1613        | 1604         | 0.01 (-0.01, 0.04)         | 0.19 |
| Zimbabwe                                            | SHINE <sup>1</sup> (HIV-) (33), LNS vs SOC | MDAT | 395         | 382          | -0.01 (-0.05, 0.03)        | 0.17 |
| Zimbabwe                                            | LNS+WSH vs WSH                             | MDAT | 446         | 417          | -0.05 (-0.10, -0.01)       | 0.17 |
| Zimbabwe                                            | SHINE <sup>1</sup> (HIV+) (34), LNS vs SOC | MDAT | 67          | 68           | -0.03 (-0.12, 0.06)        | 0.08 |
| Zimbabwe                                            | LNS+WSH vs WSH                             | MDAT | 103         | 83           | -0.14 (-0.24, -0.04)       | 0.08 |
| <b>I<sup>2</sup> = 0.64, Tau<sup>2</sup> = 0.00</b> |                                            |      |             |              | <b>-0.02 (-0.04, 0.00)</b> |      |
|                                                     |                                            |      | <b>6709</b> | <b>11380</b> |                            |      |

**Malaria prevalence – At least 10%**

|                                                     |                  |      |             |             |                            |      |
|-----------------------------------------------------|------------------|------|-------------|-------------|----------------------------|------|
| Burkina Faso                                        | iLiNS-Zinc (24)  | DMC  | 746         | 375         | -0.10 (-0.14, -0.06)       | 0.20 |
| Ghana                                               | GHANA (25)       |      |             |             |                            |      |
| Ghana                                               | iLiNS-DYADG (26) | PSED | 332         | 657         | 0.00 (-0.04, 0.04)         | 0.20 |
| Malawi                                              | iLiNS-DYADM (30) | PSED | 215         | 438         | 0.00 (-0.05, 0.05)         | 0.17 |
| Malawi                                              | iLiNS-DOSE (31)  | PSED | 644         | 221         | 0.01 (-0.04, 0.05)         | 0.18 |
| Mali                                                | PROMIS CS (32)   | DMC  | 927         | 944         | -0.03 (-0.05, 0.00)        | 0.25 |
| <b>I<sup>2</sup> = 0.75, Tau<sup>2</sup> = 0.00</b> |                  |      |             |             | <b>-0.02 (-0.06, 0.01)</b> |      |
|                                                     |                  |      | <b>2864</b> | <b>2635</b> |                            |      |

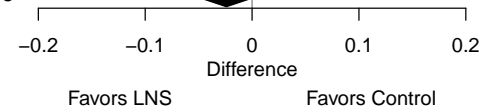

Supplemental figure 4F: Social-emotional lowest decile prevalence difference

4F4: Stratified by Anemia prevalence

**Anemia prevalence**  
(p-diff = 0.492)

**Anemia prevalence – High**

| Country      | Trial            | Tool | N           | N           |
|--------------|------------------|------|-------------|-------------|
| Burkina Faso | iLiNS-Zinc (24)  | DMC  | 746         | 375         |
| Ghana        | GHANA (25)       |      |             |             |
| Haiti        | HAITI (27)       |      |             |             |
| Malawi       | iLiNS-DYADM (30) | PSED | 215         | 438         |
| Malawi       | iLiNS-DOSE (31)  | PSED | 644         | 221         |
| Mali         | PROMIS CS (32)   | DMC  | 927         | 944         |
|              |                  |      | <b>2532</b> | <b>1978</b> |

**I<sup>2</sup> = 0.78, Tau<sup>2</sup> = 0.00**

**Anemia prevalence – Moderate**

|            |                                            |      |             |              |
|------------|--------------------------------------------|------|-------------|--------------|
| Bangladesh | JiVitA-4 (21)                              |      |             |              |
| Bangladesh | RDNS (22)                                  | DMC  | 1657        | 815          |
| Bangladesh | WASH-B (23)                                | EASQ | 1066        | 3266         |
| Ghana      | iLiNS-DYADG (26)                           | PSED | 332         | 657          |
| Kenya      | WASH-B (28)                                | EASQ | 1362        | 4745         |
| Madagascar | MAHAY (29)                                 | ASQI | 1613        | 1604         |
| Zimbabwe   | SHINE <sup>1</sup> (HIV-) (33), LNS vs SOC | MDAT | 395         | 382          |
| Zimbabwe   | LNS+WSH vs WSH                             | MDAT | 446         | 417          |
| Zimbabwe   | SHINE <sup>1</sup> (HIV+) (34), LNS vs SOC | MDAT | 67          | 68           |
| Zimbabwe   | LNS+WSH vs WSH                             | MDAT | 103         | 83           |
|            |                                            |      | <b>7041</b> | <b>12037</b> |

**I<sup>2</sup> = 0.58, Tau<sup>2</sup> = 0.00**

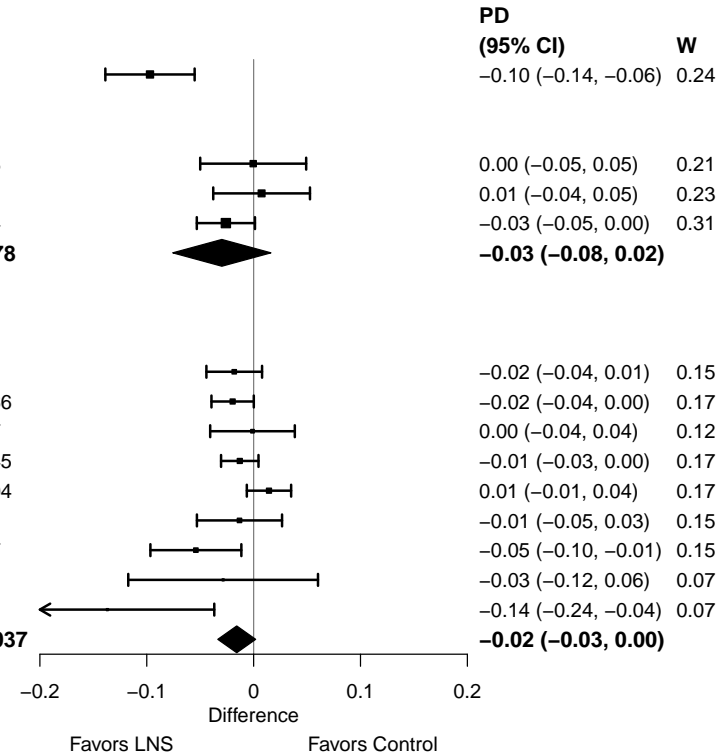

Supplemental figure 4F: Social-emotional lowest decile prevalence difference

4F5: Stratified by Source water quality

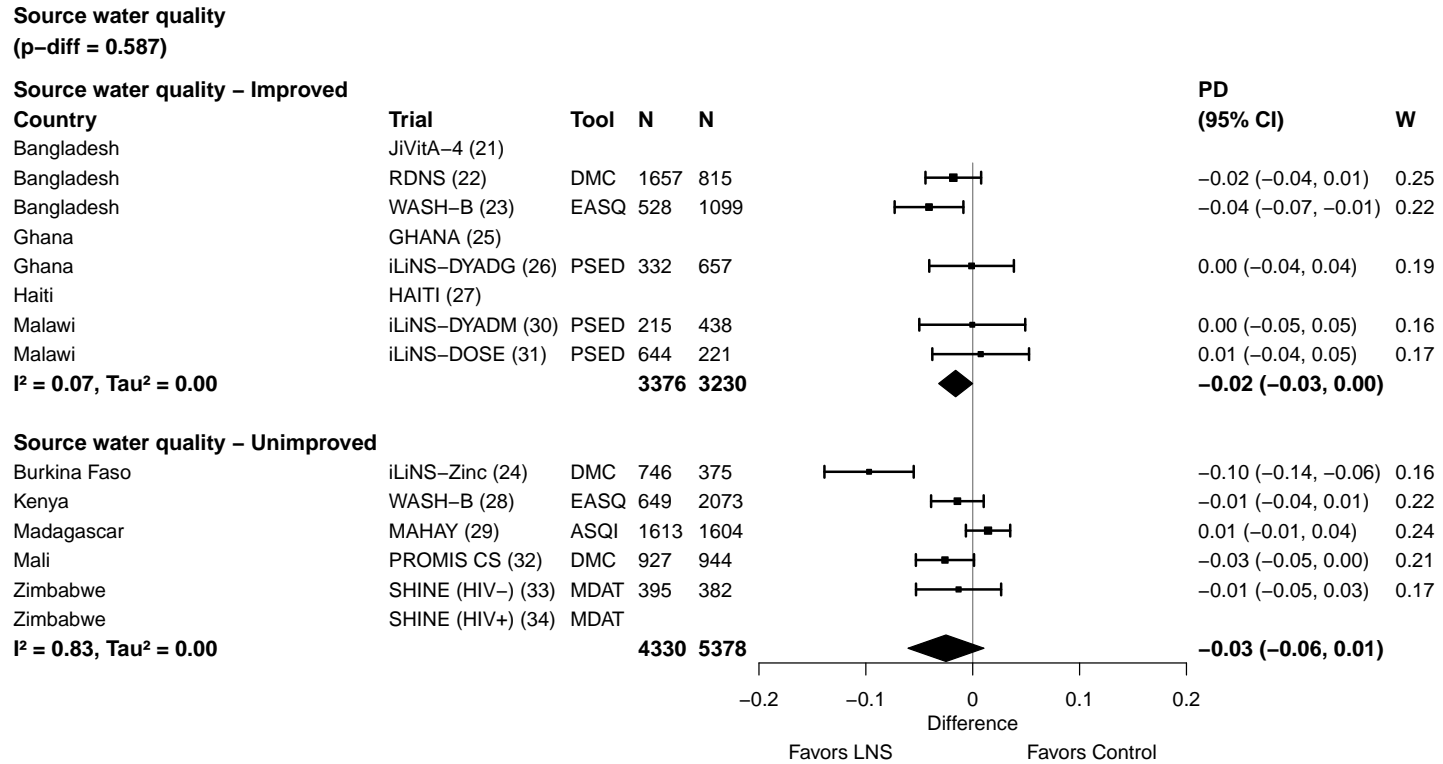

Supplemental figure 4F: Social-emotional lowest decile prevalence difference

4F6: Stratified by Sanitation

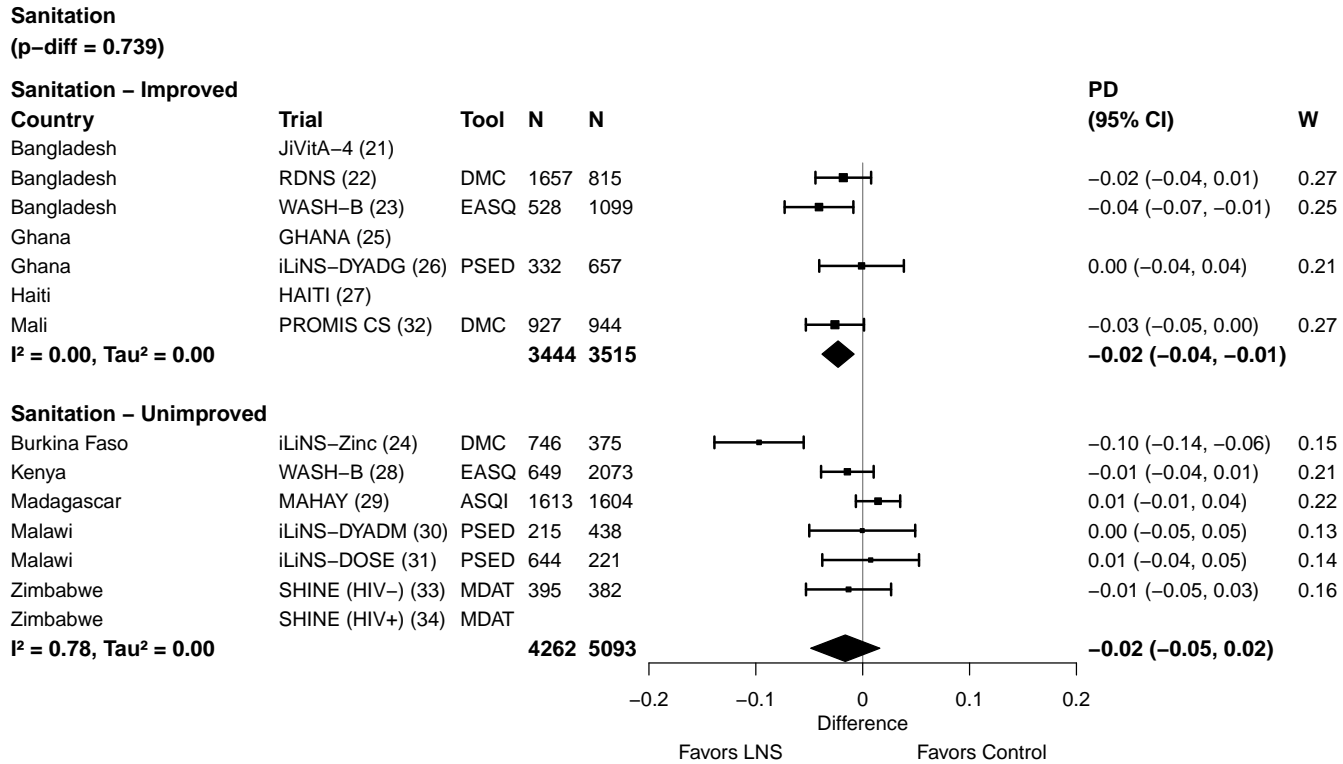

Supplemental figure 4F: Social-emotional lowest decile prevalence difference

4F7: Stratified by Supplement duration

Supplement duration  
(p-diff = 0.815)

Supplement duration – 12m or less

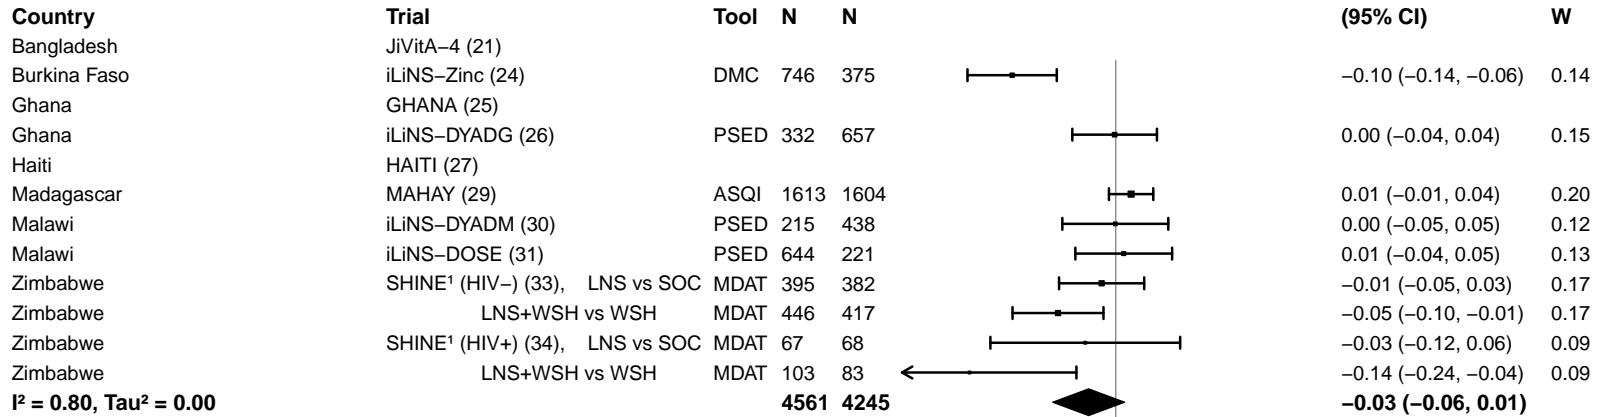

Supplement duration – > 12m

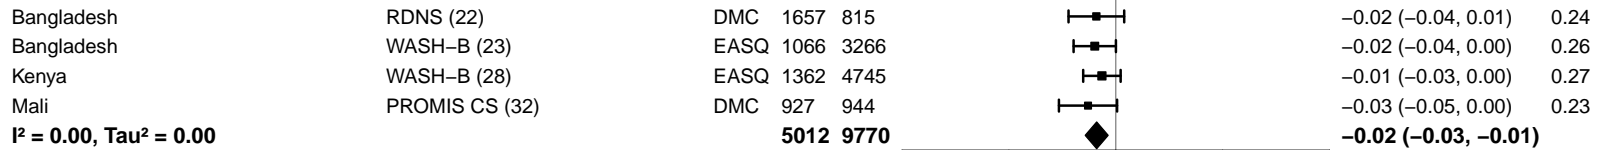



Supplemental figure 4F: Social-emotional lowest decile prevalence difference

4F8: Stratified by Frequency of contact

Frequency of contact  
(p-diff = 0.919)

Frequency of contact – Monthly

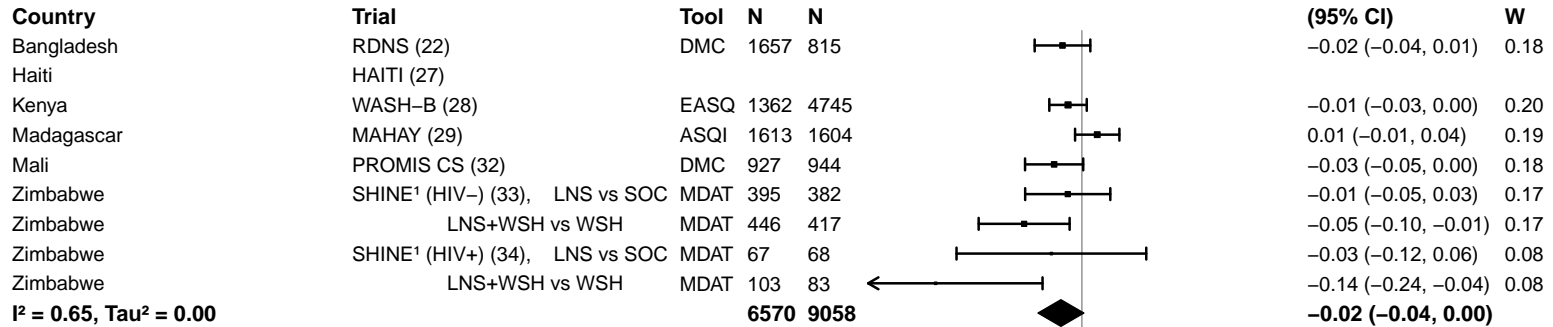

Frequency of contact – Weekly

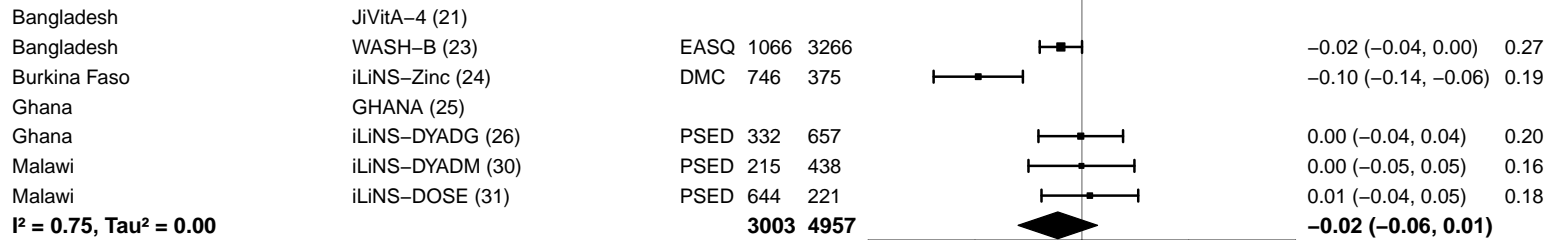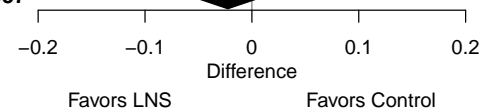

Supplemental figure 4F: Social-emotional lowest decile prevalence difference

4F9: Stratified by Average SQ-LNS compliance

Average SQ-LNS compliance  
( $p$ -diff = 0.563)

Average SQ-LNS compliance – Low

| Country                                             | Trial                                      | Tool | N           | N           | PD (95% CI)                | W    |
|-----------------------------------------------------|--------------------------------------------|------|-------------|-------------|----------------------------|------|
| Ghana                                               | iLiNS-DYADG (26)                           | PSED | 332         | 657         | 0.00 (-0.04, 0.04)         | 0.17 |
| Malawi                                              | iLiNS-DYADM (30)                           | PSED | 215         | 438         | 0.00 (-0.05, 0.05)         | 0.14 |
| Malawi                                              | iLiNS-DOSE (31)                            | PSED | 644         | 221         | 0.01 (-0.04, 0.05)         | 0.16 |
| Mali                                                | PROMIS CS (32)                             | DMC  | 927         | 944         | -0.03 (-0.05, 0.00)        | 0.22 |
| Zimbabwe                                            | SHINE <sup>1</sup> (HIV-) (33), LNS vs SOC | MDAT | 395         | 382         | -0.01 (-0.05, 0.03)        | 0.21 |
| Zimbabwe                                            | LNS+WSH vs WSH                             | MDAT | 446         | 417         | -0.05 (-0.10, -0.01)       | 0.21 |
| Zimbabwe                                            | SHINE <sup>1</sup> (HIV+) (34), LNS vs SOC | MDAT | 67          | 68          | -0.03 (-0.12, 0.06)        | 0.10 |
| Zimbabwe                                            | LNS+WSH vs WSH                             | MDAT | 103         | 83          | -0.14 (-0.24, -0.04)       | 0.10 |
| <b><math>I^2 = 0.35, \text{Tau}^2 = 0.00</math></b> |                                            |      | <b>3129</b> | <b>3210</b> | <b>-0.02 (-0.04, 0.00)</b> |      |

Average SQ-LNS compliance – High

|                                                     |                 |      |             |             |                            |      |
|-----------------------------------------------------|-----------------|------|-------------|-------------|----------------------------|------|
| Bangladesh                                          | JiVitA-4 (21)   |      |             |             |                            |      |
| Bangladesh                                          | RDNS (22)       | DMC  | 1657        | 815         | -0.02 (-0.04, 0.01)        | 0.25 |
| Bangladesh                                          | WASH-B (23)     | EASQ | 1066        | 3266        | -0.02 (-0.04, 0.00)        | 0.28 |
| Burkina Faso                                        | iLiNS-Zinc (24) | DMC  | 746         | 375         | -0.10 (-0.14, -0.06)       | 0.19 |
| Ghana                                               | GHANA (25)      |      |             |             |                            |      |
| Haiti                                               | HAITI (27)      |      |             |             |                            |      |
| Kenya                                               | WASH-B (28)     | EASQ | 1362        | 4745        | -0.01 (-0.03, 0.00)        | 0.28 |
| <b><math>I^2 = 0.78, \text{Tau}^2 = 0.00</math></b> |                 |      | <b>4831</b> | <b>9201</b> | <b>-0.03 (-0.07, 0.00)</b> |      |

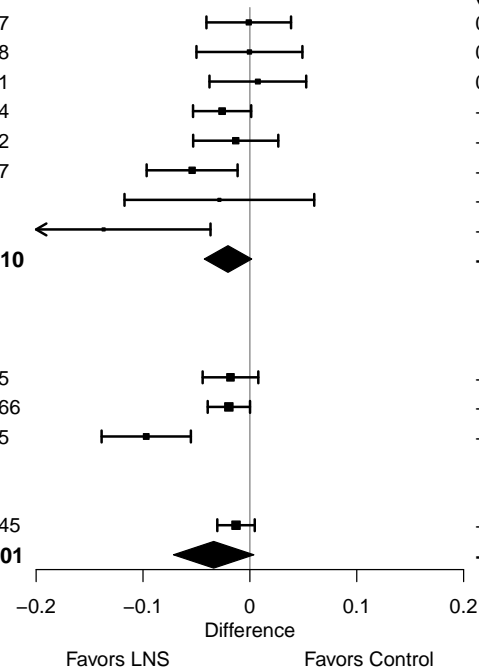

## Supplemental figure 4G: Mean difference in motor z-score

### 4G1: Stratified by Geographic region

#### Geographic region

( $p$ -diff = 0.591)

#### Geographic region – SEAR

| Country    | Trial         | Tool     | N           | N           |
|------------|---------------|----------|-------------|-------------|
| Bangladesh | JiVitA-4 (21) | BSID-III | 445         | 143         |
| Bangladesh | RDNS (22)     | DMC      | 1556        | 753         |
| Bangladesh | WASH-B (23)   | EASQ     | 1074        | 3279        |
|            |               |          | <b>3075</b> | <b>4175</b> |

$I^2 = 0.05$ ,  $\text{Tau}^2 = 0.00$

#### Geographic region – AFR

|              |                                            |      |             |             |
|--------------|--------------------------------------------|------|-------------|-------------|
| Burkina Faso | iLiNS-Zinc (24)                            | DMC  | 746         | 375         |
| Ghana        | GHANA (25)                                 |      |             |             |
| Ghana        | iLiNS-DYADG (26)                           | KDI  | 302         | 601         |
| Kenya        | WASH-B (28)                                | EASQ | 1362        | 4745        |
| Madagascar   | MAHAY (29)                                 | ASQI | 1613        | 1604        |
| Malawi       | iLiNS-DYADM (30)                           | KDI  | 214         | 436         |
| Malawi       | iLiNS-DOSE (31)                            | KDI  | 646         | 221         |
| Mali         | PROMIS CS (32)                             | DMC  | 902         | 921         |
| Zimbabwe     | SHINE <sup>1</sup> (HIV-) (33), LNS vs SOC | MDAT | 395         | 382         |
| Zimbabwe     | LNS+WSH vs WSH                             | MDAT | 446         | 417         |
| Zimbabwe     | SHINE <sup>1</sup> (HIV+) (34), LNS vs SOC | MDAT | 67          | 68          |
| Zimbabwe     | LNS+WSH vs WSH                             | MDAT | 103         | 83          |
|              |                                            |      | <b>6796</b> | <b>9853</b> |

$I^2 = 0.68$ ,  $\text{Tau}^2 = 0.01$

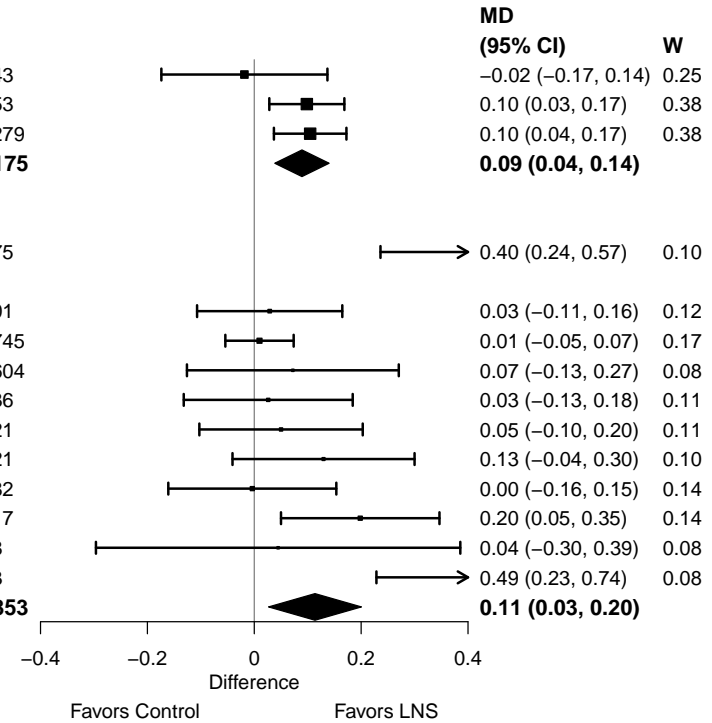

Supplemental figure 4G: Mean difference in motor z-score

4G2: Stratified by Stunting burden

**Stunting burden**

( $p$ -diff = 0.045)

**Stunting burden – Less than 35%**

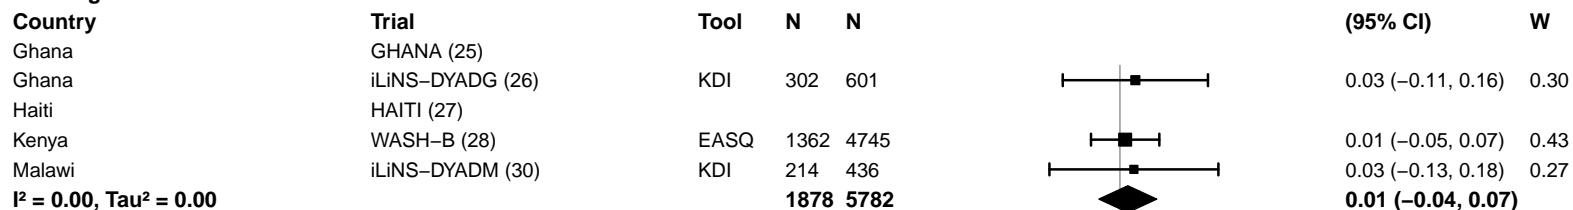

**Stunting burden – More than 35%**

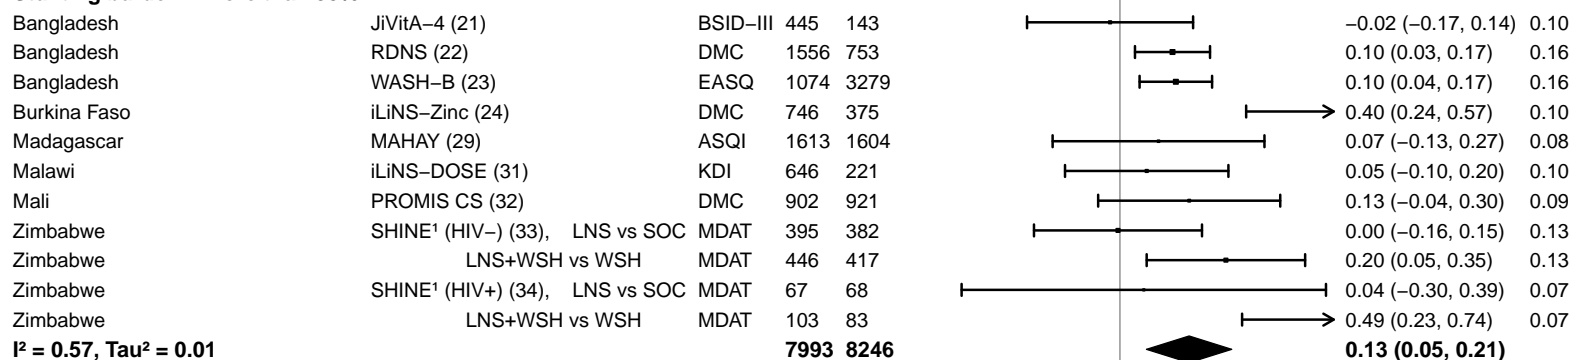

Supplemental figure 4G: Mean difference in motor z-score

4G3: Stratified by Malaria prevalence

**Malaria prevalence**

(p-diff = 0.557)

**Malaria prevalence – Less than 10%**

| Country    | Trial                                      | Tool     | N           | N            |
|------------|--------------------------------------------|----------|-------------|--------------|
| Bangladesh | JiVitA-4 (21)                              | BSID-III | 445         | 143          |
| Bangladesh | RDNS (22)                                  | DMC      | 1556        | 753          |
| Bangladesh | WASH-B (23)                                | EASQ     | 1074        | 3279         |
| Haiti      | HAITI (27)                                 |          |             |              |
| Kenya      | WASH-B (28)                                | EASQ     | 1362        | 4745         |
| Madagascar | MAHAY (29)                                 | ASQI     | 1613        | 1604         |
| Zimbabwe   | SHINE <sup>1</sup> (HIV-) (33), LNS vs SOC | MDAT     | 395         | 382          |
| Zimbabwe   | LNS+WSH vs WSH                             | MDAT     | 446         | 417          |
| Zimbabwe   | SHINE <sup>1</sup> (HIV+) (34), LNS vs SOC | MDAT     | 67          | 68           |
| Zimbabwe   | LNS+WSH vs WSH                             | MDAT     | 103         | 83           |
|            |                                            |          | <b>7061</b> | <b>11474</b> |

I<sup>2</sup> = 0.47, Tau<sup>2</sup> = 0.00

**Malaria prevalence – At least 10%**

|              |                  |     |             |             |
|--------------|------------------|-----|-------------|-------------|
| Burkina Faso | iLiNS-Zinc (24)  | DMC | 746         | 375         |
| Ghana        | GHANA (25)       |     |             |             |
| Ghana        | iLiNS-DYADG (26) | KDI | 302         | 601         |
| Malawi       | iLiNS-DYADM (30) | KDI | 214         | 436         |
| Malawi       | iLiNS-DOSE (31)  | KDI | 646         | 221         |
| Mali         | PROMIS CS (32)   | DMC | 902         | 921         |
|              |                  |     | <b>2810</b> | <b>2554</b> |

I<sup>2</sup> = 0.73, Tau<sup>2</sup> = 0.02

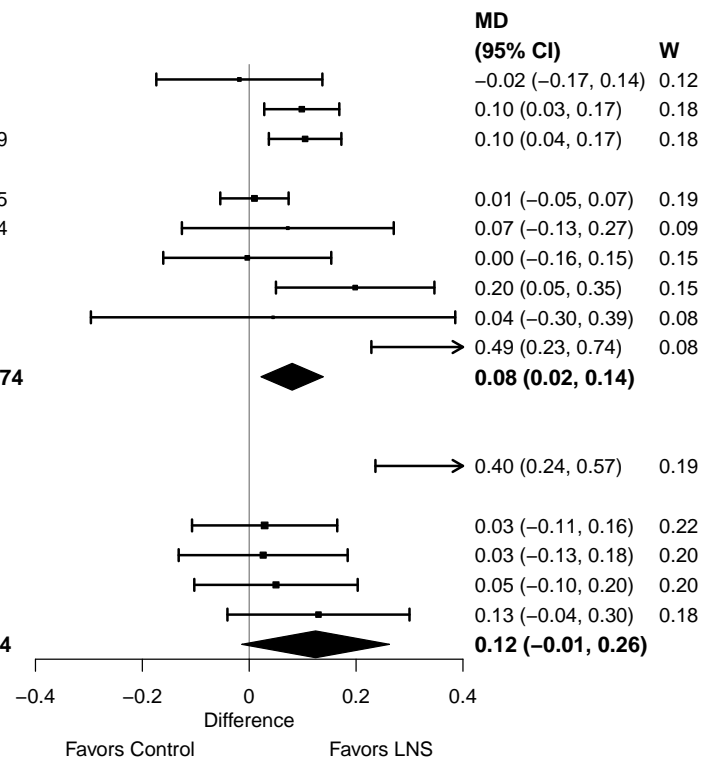

Supplemental figure 4G: Mean difference in motor z-score

4G4: Stratified by Anemia prevalence

**Anemia prevalence**  
(p-diff = 0.269)

**Anemia prevalence – High**

| Country      | Trial            | Tool | N           | N           |
|--------------|------------------|------|-------------|-------------|
| Burkina Faso | iLiNS–Zinc (24)  | DMC  | 746         | 375         |
| Ghana        | GHANA (25)       |      |             |             |
| Haiti        | HAITI (27)       |      |             |             |
| Malawi       | iLiNS–DYADM (30) | KDI  | 214         | 436         |
| Malawi       | iLiNS–DOSE (31)  | KDI  | 646         | 221         |
| Mali         | PROMIS CS (32)   | DMC  | 902         | 921         |
|              |                  |      | <b>2508</b> | <b>1953</b> |

$I^2 = 0.77, \text{Tau}^2 = 0.02$

**Anemia prevalence – Moderate**

|            |                                            |          |             |              |
|------------|--------------------------------------------|----------|-------------|--------------|
| Bangladesh | JiVitA–4 (21)                              | BSID–III | 445         | 143          |
| Bangladesh | RDNS (22)                                  | DMC      | 1556        | 753          |
| Bangladesh | WASH–B (23)                                | EASQ     | 1074        | 3279         |
| Ghana      | iLiNS–DYADG (26)                           | KDI      | 302         | 601          |
| Kenya      | WASH–B (28)                                | EASQ     | 1362        | 4745         |
| Madagascar | MAHAY (29)                                 | ASQI     | 1613        | 1604         |
| Zimbabwe   | SHINE <sup>1</sup> (HIV–) (33), LNS vs SOC | MDAT     | 395         | 382          |
| Zimbabwe   | LNS+WSH vs WSH                             | MDAT     | 446         | 417          |
| Zimbabwe   | SHINE <sup>1</sup> (HIV+) (34), LNS vs SOC | MDAT     | 67          | 68           |
| Zimbabwe   | LNS+WSH vs WSH                             | MDAT     | 103         | 83           |
|            |                                            |          | <b>7363</b> | <b>12075</b> |

$I^2 = 0.40, \text{Tau}^2 = 0.00$

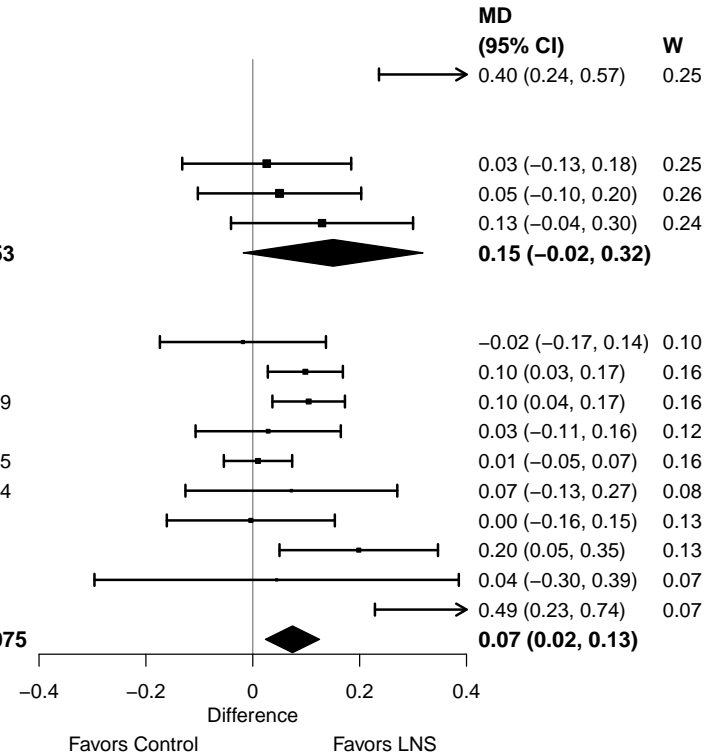

Supplemental figure 4G: Mean difference in motor z-score

4G5: Stratified by Source water quality

**Source water quality**  
(p-diff = 0.530)

**Source water quality – Improved**

| Country                                             | Trial            | Tool     | N           | N           |
|-----------------------------------------------------|------------------|----------|-------------|-------------|
| Bangladesh                                          | JiVitA-4 (21)    | BSID-III | 445         | 143         |
| Bangladesh                                          | RDNS (22)        | DMC      | 1556        | 753         |
| Bangladesh                                          | WASH-B (23)      | EASQ     | 528         | 1099        |
| Ghana                                               | GHANA (25)       |          |             |             |
| Ghana                                               | iLiNS-DYADG (26) | KDI      | 302         | 601         |
| Haiti                                               | HAITI (27)       |          |             |             |
| Malawi                                              | iLiNS-DYADM (30) | KDI      | 214         | 436         |
| Malawi                                              | iLiNS-DOSE (31)  | KDI      | 646         | 221         |
| <b>I<sup>2</sup> = 0.32, Tau<sup>2</sup> = 0.00</b> |                  |          | <b>3691</b> | <b>3253</b> |

**Source water quality – Unimproved**

|                                                     |                   |      |             |             |
|-----------------------------------------------------|-------------------|------|-------------|-------------|
| Burkina Faso                                        | iLiNS-Zinc (24)   | DMC  | 746         | 375         |
| Kenya                                               | WASH-B (28)       | EASQ | 649         | 2073        |
| Madagascar                                          | MAHAY (29)        | ASQI | 1613        | 1604        |
| Mali                                                | PROMIS CS (32)    | DMC  | 902         | 921         |
| Zimbabwe                                            | SHINE (HIV-) (33) | MDAT | 395         | 382         |
| Zimbabwe                                            | SHINE (HIV+) (34) | MDAT | 67          | 68          |
| <b>I<sup>2</sup> = 0.70, Tau<sup>2</sup> = 0.01</b> |                   |      | <b>4372</b> | <b>5423</b> |

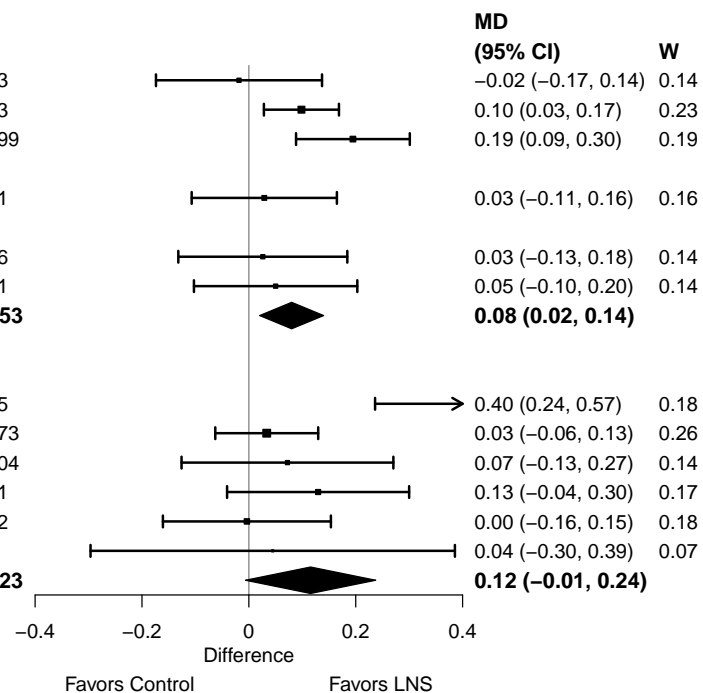

Supplemental figure 4G: Mean difference in motor z-score

4G6: Stratified by Sanitation

**Sanitation**  
(p-diff = 0.963)

**Sanitation – Improved**

| Country                                             | Trial            | Tool     | N           | N           |
|-----------------------------------------------------|------------------|----------|-------------|-------------|
| Bangladesh                                          | JiViTA-4 (21)    | BSID-III | 445         | 143         |
| Bangladesh                                          | RDNS (22)        | DMC      | 1556        | 753         |
| Bangladesh                                          | WASH-B (23)      | EASQ     | 528         | 1099        |
| Ghana                                               | GHANA (25)       |          |             |             |
| Ghana                                               | iLiNS-DYADG (26) | KDI      | 302         | 601         |
| Haiti                                               | HAITI (27)       |          |             |             |
| Mali                                                | PROMIS CS (32)   | DMC      | 902         | 921         |
| <b>I<sup>2</sup> = 0.38, Tau<sup>2</sup> = 0.00</b> |                  |          | <b>3733</b> | <b>3517</b> |

**Sanitation – Unimproved**

|                                                     |                   |      |             |             |
|-----------------------------------------------------|-------------------|------|-------------|-------------|
| Burkina Faso                                        | iLiNS-Zinc (24)   | DMC  | 746         | 375         |
| Kenya                                               | WASH-B (28)       | EASQ | 649         | 2073        |
| Madagascar                                          | MAHAY (29)        | ASQI | 1613        | 1604        |
| Malawi                                              | iLiNS-DYADM (30)  | KDI  | 214         | 436         |
| Malawi                                              | iLiNS-DOSE (31)   | KDI  | 646         | 221         |
| Zimbabwe                                            | SHINE (HIV-) (33) | MDAT | 395         | 382         |
| Zimbabwe                                            | SHINE (HIV+) (34) | MDAT | 67          | 68          |
| <b>I<sup>2</sup> = 0.65, Tau<sup>2</sup> = 0.01</b> |                   |      | <b>4330</b> | <b>5159</b> |

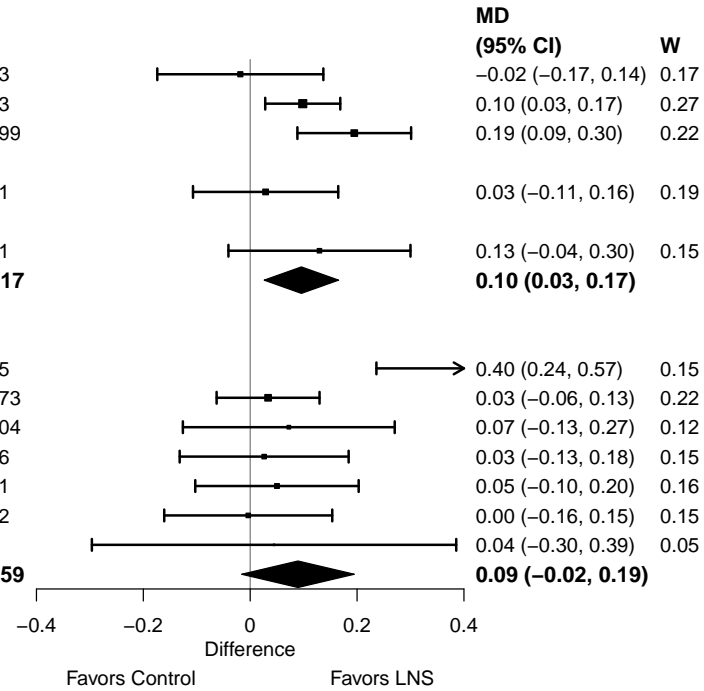



Supplemental figure 4G: Mean difference in motor z-score

4G7: Stratified by Supplement duration

**Supplement duration**

(p-diff = 0.621)

**Supplement duration – 12m or less**

| Country      | Trial                                      | Tool     | N           | N           |
|--------------|--------------------------------------------|----------|-------------|-------------|
| Bangladesh   | JiVitA-4 (21)                              | BSID-III | 445         | 143         |
| Burkina Faso | iLiNS-Zinc (24)                            | DMC      | 746         | 375         |
| Ghana        | GHANA (25)                                 |          |             |             |
| Ghana        | iLiNS-DYADG (26)                           | KDI      | 302         | 601         |
| Haiti        | HAITI (27)                                 |          |             |             |
| Madagascar   | MAHAY (29)                                 | ASQI     | 1613        | 1604        |
| Malawi       | iLiNS-DYADM (30)                           | KDI      | 214         | 436         |
| Malawi       | iLiNS-DOSE (31)                            | KDI      | 646         | 221         |
| Zimbabwe     | SHINE <sup>1</sup> (HIV-) (33), LNS vs SOC | MDAT     | 395         | 382         |
| Zimbabwe     | LNS+WSH vs WSH                             | MDAT     | 446         | 417         |
| Zimbabwe     | SHINE <sup>1</sup> (HIV+) (34), LNS vs SOC | MDAT     | 67          | 68          |
| Zimbabwe     | LNS+WSH vs WSH                             | MDAT     | 103         | 83          |
|              |                                            |          | <b>4977</b> | <b>4330</b> |

**I<sup>2</sup> = 0.67, Tau<sup>2</sup> = 0.01**

**Supplement duration – > 12m**

|            |                |      |             |             |
|------------|----------------|------|-------------|-------------|
| Bangladesh | RDNS (22)      | DMC  | 1556        | 753         |
| Bangladesh | WASH-B (23)    | EASQ | 1074        | 3279        |
| Kenya      | WASH-B (28)    | EASQ | 1362        | 4745        |
| Mali       | PROMIS CS (32) | DMC  | 902         | 921         |
|            |                |      | <b>4894</b> | <b>9698</b> |

**I<sup>2</sup> = 0.45, Tau<sup>2</sup> = 0.00**

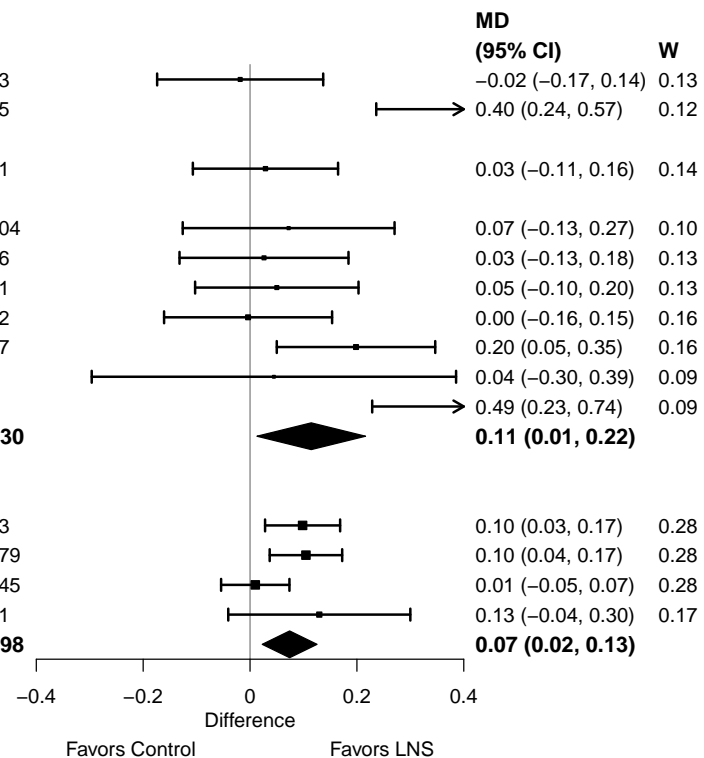

Supplemental figure 4G: Mean difference in motor z-score

4G8: Stratified by Frequency of contact

**Frequency of contact**  
( $p$ -diff = 0.932)

**Frequency of contact – Monthly**

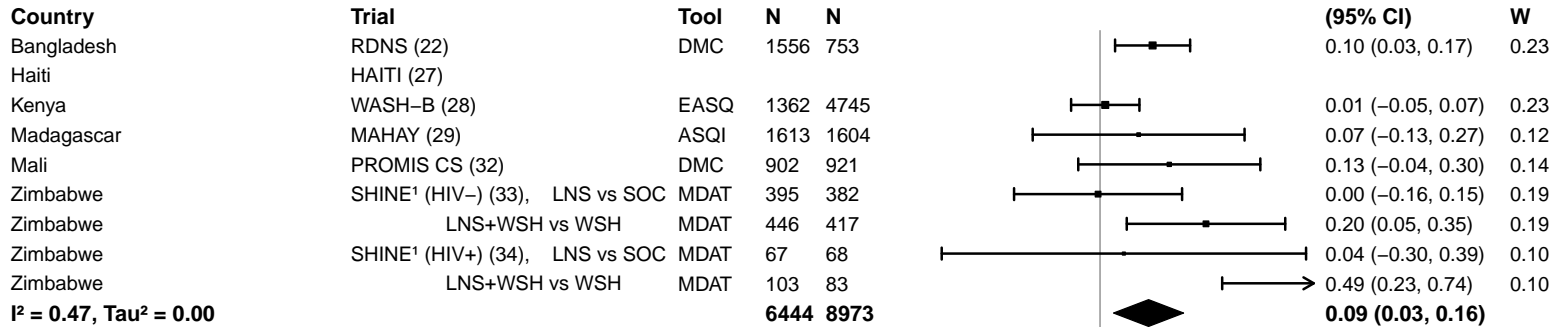

**Frequency of contact – Weekly**

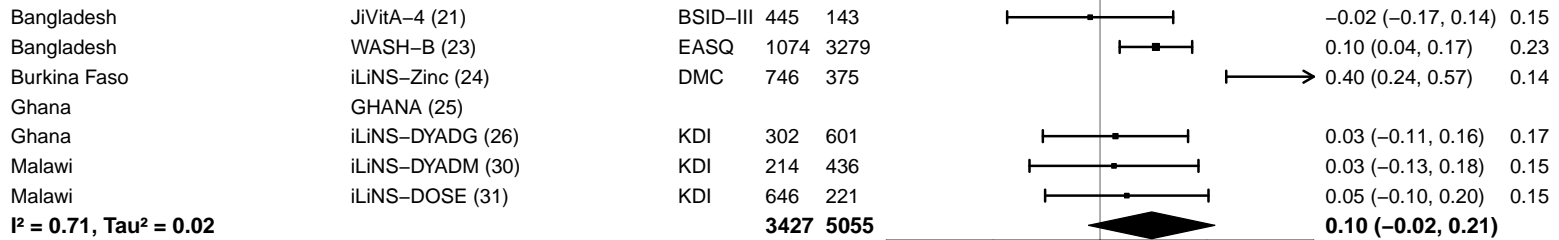

-0.4 -0.2 0 0.2 0.4  
Difference  
Favors Control Favors LNS

Supplemental figure 4G: Mean difference in motor z-score

4G9: Stratified by Average SQ-LNS compliance

**Average SQ-LNS compliance**  
(p-diff = 0.898)

**Average SQ-LNS compliance – Low**

| Country  | Trial                                      | Tool | N           | N           | MD (95% CI)              | W    |
|----------|--------------------------------------------|------|-------------|-------------|--------------------------|------|
| Ghana    | iLiNS-DYADG (26)                           | KDI  | 302         | 601         | 0.03 (-0.11, 0.16)       | 0.18 |
| Malawi   | iLiNS-DYADM (30)                           | KDI  | 214         | 436         | 0.03 (-0.13, 0.18)       | 0.16 |
| Malawi   | iLiNS-DOSE (31)                            | KDI  | 646         | 221         | 0.05 (-0.10, 0.20)       | 0.17 |
| Mali     | PROMIS CS (32)                             | DMC  | 902         | 921         | 0.13 (-0.04, 0.30)       | 0.15 |
| Zimbabwe | SHINE <sup>1</sup> (HIV-) (33), LNS vs SOC | MDAT | 395         | 382         | 0.00 (-0.16, 0.15)       | 0.21 |
| Zimbabwe | LNS+WSH vs WSH                             | MDAT | 446         | 417         | 0.20 (0.05, 0.35)        | 0.21 |
| Zimbabwe | SHINE <sup>1</sup> (HIV+) (34), LNS vs SOC | MDAT | 67          | 68          | 0.04 (-0.30, 0.39)       | 0.12 |
| Zimbabwe | LNS+WSH vs WSH                             | MDAT | 103         | 83          | 0.49 (0.23, 0.74)        | 0.12 |
|          |                                            |      | <b>3075</b> | <b>3129</b> | <b>0.09 (0.02, 0.16)</b> |      |

**I<sup>2</sup> = 0.14, Tau<sup>2</sup> = 0.00**

**Average SQ-LNS compliance – High**

|              |                 |          |             |             |                           |      |
|--------------|-----------------|----------|-------------|-------------|---------------------------|------|
| Bangladesh   | JiVitA-4 (21)   | BSID-III | 445         | 143         | -0.02 (-0.17, 0.14)       | 0.16 |
| Bangladesh   | RDNS (22)       | DMC      | 1556        | 753         | 0.10 (0.03, 0.17)         | 0.23 |
| Bangladesh   | WASH-B (23)     | EASQ     | 1074        | 3279        | 0.10 (0.04, 0.17)         | 0.23 |
| Burkina Faso | iLiNS-Zinc (24) | DMC      | 746         | 375         | 0.40 (0.24, 0.57)         | 0.15 |
| Ghana        | GHANA (25)      |          |             |             |                           |      |
| Haiti        | HAITI (27)      |          |             |             |                           |      |
| Kenya        | WASH-B (28)     | EASQ     | 1362        | 4745        | 0.01 (-0.05, 0.07)        | 0.23 |
|              |                 |          | <b>5183</b> | <b>9295</b> | <b>0.11 (-0.03, 0.25)</b> |      |

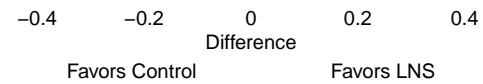

## Supplemental figure 4H: Motor lowest decile prevalence ratio

### 4H1: Stratified by Geographic region

**Geographic region**  
(p-diff = 0.610)

**Geographic region – SEAR**

| Country    | Trial         | Tool     | N           | N           |
|------------|---------------|----------|-------------|-------------|
| Bangladesh | JiVitA-4 (21) | BSID-III | 445         | 143         |
| Bangladesh | RDNS (22)     | DMC      | 1556        | 753         |
| Bangladesh | WASH-B (23)   | EASQ     | 1074        | 3279        |
|            |               |          | <b>3075</b> | <b>4175</b> |

$I^2 = 0.20$ ,  $Tau^2 = 0.01$

**Geographic region – AFR**

|              |                                            |      |             |             |
|--------------|--------------------------------------------|------|-------------|-------------|
| Burkina Faso | iLiNS-Zinc (24)                            | DMC  | 746         | 375         |
| Ghana        | GHANA (25)                                 |      |             |             |
| Ghana        | iLiNS-DYADG (26)                           | KDI  | 302         | 601         |
| Kenya        | WASH-B (28)                                | EASQ | 1362        | 4745        |
| Madagascar   | MAHAY (29)                                 | ASQI | 1613        | 1604        |
| Malawi       | iLiNS-DYADM (30)                           | KDI  | 214         | 436         |
| Malawi       | iLiNS-DOSE (31)                            | KDI  | 646         | 221         |
| Mali         | PROMIS CS (32)                             | DMC  | 902         | 921         |
| Zimbabwe     | SHINE <sup>1</sup> (HIV-) (33), LNS vs SOC | MDAT | 395         | 382         |
| Zimbabwe     | LNS+WSH vs WSH                             | MDAT | 446         | 417         |
| Zimbabwe     | SHINE <sup>1</sup> (HIV+) (34), LNS vs SOC | MDAT | 67          | 68          |
| Zimbabwe     | LNS+WSH vs WSH                             | MDAT | 103         | 83          |
|              |                                            |      | <b>6796</b> | <b>9853</b> |

$I^2 = 0.48$ ,  $Tau^2 = 0.03$

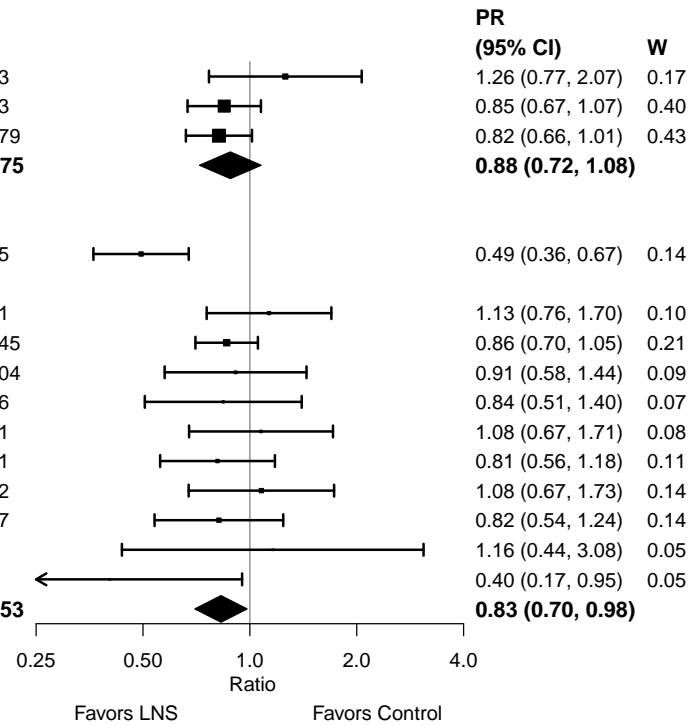

Supplemental figure 4H: Motor lowest decile prevalence ratio

4H2: Stratified by Stunting burden

**Stunting burden**

(p-diff = 0.466)

**Stunting burden – Less than 35%**

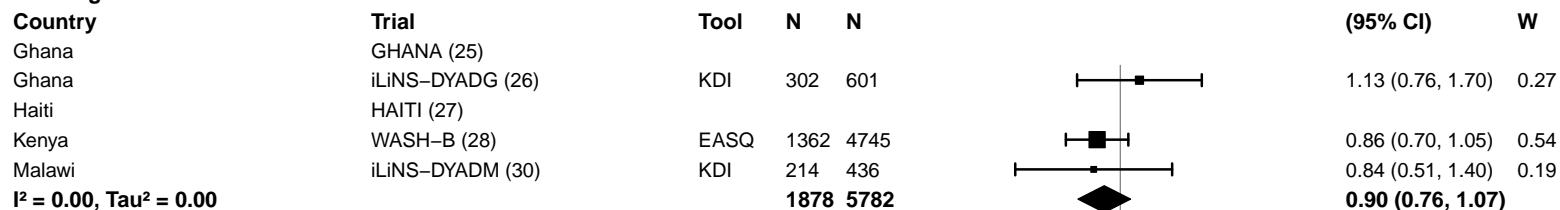

**Stunting burden – More than 35%**

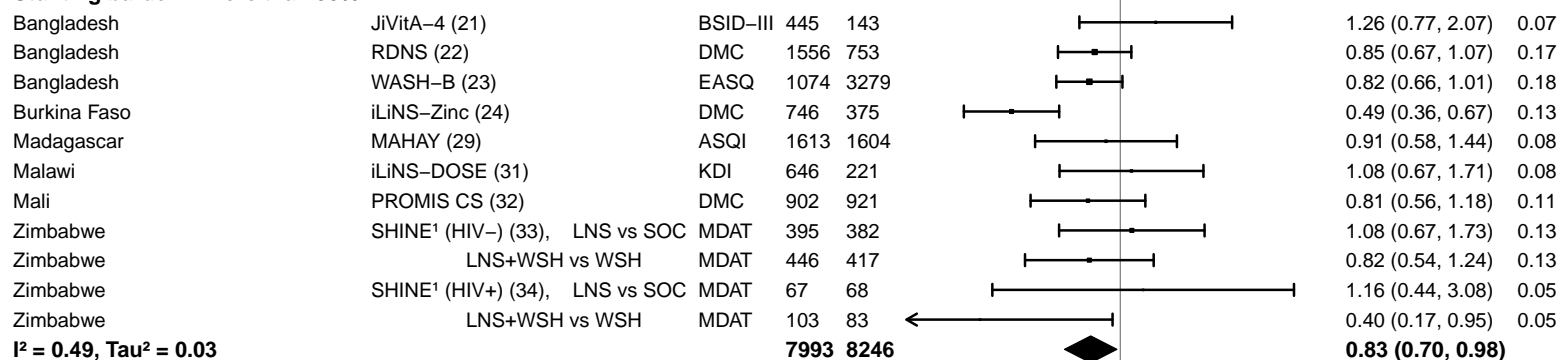

Supplemental figure 4H: Motor lowest decile prevalence ratio

4H3: Stratified by Malaria prevalence

**Malaria prevalence**  
(p-diff = 0.491)

**Malaria prevalence – Less than 10%**

| Country    | Trial                                      | Tool     | N           | N            | PR (95% CI)              | W    |
|------------|--------------------------------------------|----------|-------------|--------------|--------------------------|------|
| Bangladesh | JiVitA-4 (21)                              | BSID-III | 445         | 143          | 1.26 (0.77, 2.07)        | 0.08 |
| Bangladesh | RDNS (22)                                  | DMC      | 1556        | 753          | 0.85 (0.67, 1.07)        | 0.19 |
| Bangladesh | WASH-B (23)                                | EASQ     | 1074        | 3279         | 0.82 (0.66, 1.01)        | 0.21 |
| Haiti      | HAITI (27)                                 |          |             |              |                          |      |
| Kenya      | WASH-B (28)                                | EASQ     | 1362        | 4745         | 0.86 (0.70, 1.05)        | 0.22 |
| Madagascar | MAHAY (29)                                 | ASQI     | 1613        | 1604         | 0.91 (0.58, 1.44)        | 0.09 |
| Zimbabwe   | SHINE <sup>1</sup> (HIV-) (33), LNS vs SOC | MDAT     | 395         | 382          | 1.08 (0.67, 1.73)        | 0.15 |
| Zimbabwe   | LNS+WSH vs WSH                             | MDAT     | 446         | 417          | 0.82 (0.54, 1.24)        | 0.15 |
| Zimbabwe   | SHINE <sup>1</sup> (HIV+) (34), LNS vs SOC | MDAT     | 67          | 68           | 1.16 (0.44, 3.08)        | 0.05 |
| Zimbabwe   | LNS+WSH vs WSH                             | MDAT     | 103         | 83           | 0.40 (0.17, 0.95)        | 0.05 |
|            |                                            |          | <b>7061</b> | <b>11474</b> | <b>0.87 (0.78, 0.97)</b> |      |

I<sup>2</sup> = 0.00, Tau<sup>2</sup> = 0.00

**Malaria prevalence – At least 10%**

|              |                  |     |             |             |                          |      |
|--------------|------------------|-----|-------------|-------------|--------------------------|------|
| Burkina Faso | iLiNS-Zinc (24)  | DMC | 746         | 375         | 0.49 (0.36, 0.67)        | 0.27 |
| Ghana        | GHANA (25)       |     |             |             |                          |      |
| Ghana        | iLiNS-DYADG (26) | KDI | 302         | 601         | 1.13 (0.76, 1.70)        | 0.20 |
| Malawi       | iLiNS-DYADM (30) | KDI | 214         | 436         | 0.84 (0.51, 1.40)        | 0.14 |
| Malawi       | iLiNS-DOSE (31)  | KDI | 646         | 221         | 1.08 (0.67, 1.71)        | 0.16 |
| Mali         | PROMIS CS (32)   | DMC | 902         | 921         | 0.81 (0.56, 1.18)        | 0.22 |
|              |                  |     | <b>2810</b> | <b>2554</b> | <b>0.82 (0.60, 1.10)</b> |      |

I<sup>2</sup> = 0.71, Tau<sup>2</sup> = 0.08

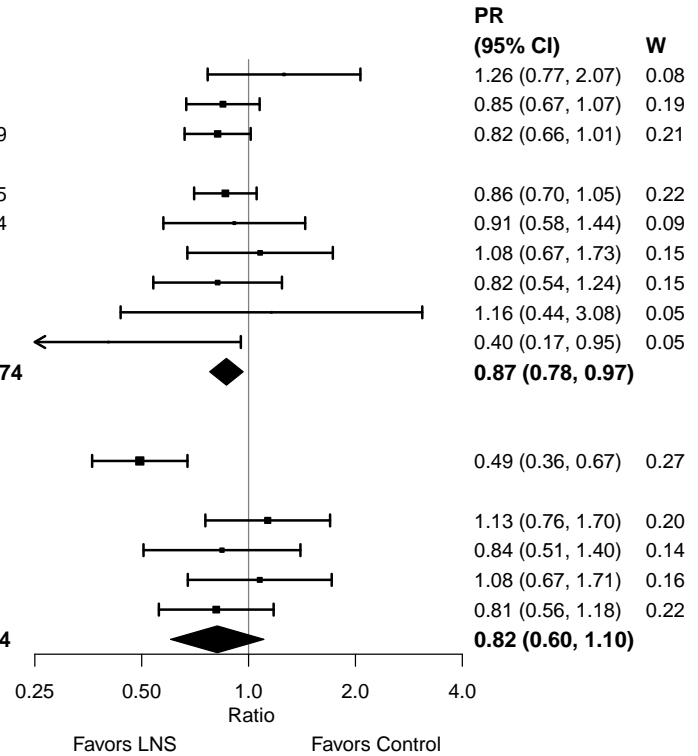

Supplemental figure 4H: Motor lowest decile prevalence ratio

4H4: Stratified by Anemia prevalence

**Anemia prevalence**

(p-diff = 0.093)

**Anemia prevalence – High**

| Country      | Trial            | Tool | N           | N           | PR (95% CI)              | W    |
|--------------|------------------|------|-------------|-------------|--------------------------|------|
| Burkina Faso | iLiNS-Zinc (24)  | DMC  | 746         | 375         | 0.49 (0.36, 0.67)        | 0.34 |
| Ghana        | GHANA (25)       |      |             |             |                          |      |
| Haiti        | HAITI (27)       |      |             |             |                          |      |
| Malawi       | iLiNS-DYADM (30) | KDI  | 214         | 436         | 0.84 (0.51, 1.40)        | 0.18 |
| Malawi       | iLiNS-DOSE (31)  | KDI  | 646         | 221         | 1.08 (0.67, 1.71)        | 0.20 |
| Mali         | PROMIS CS (32)   | DMC  | 902         | 921         | 0.81 (0.56, 1.18)        | 0.28 |
|              |                  |      | <b>2508</b> | <b>1953</b> | <b>0.75 (0.54, 1.05)</b> |      |

**I<sup>2</sup> = 0.68, Tau<sup>2</sup> = 0.07**

**Anemia prevalence – Moderate**

|            |                                            |          |             |              |                          |      |
|------------|--------------------------------------------|----------|-------------|--------------|--------------------------|------|
| Bangladesh | JiVitA-4 (21)                              | BSID-III | 445         | 143          | 1.26 (0.77, 2.07)        | 0.07 |
| Bangladesh | RDNS (22)                                  | DMC      | 1556        | 753          | 0.85 (0.67, 1.07)        | 0.18 |
| Bangladesh | WASH-B (23)                                | EASQ     | 1074        | 3279         | 0.82 (0.66, 1.01)        | 0.19 |
| Ghana      | iLiNS-DYADG (26)                           | KDI      | 302         | 601          | 1.13 (0.76, 1.70)        | 0.10 |
| Kenya      | WASH-B (28)                                | EASQ     | 1362        | 4745         | 0.86 (0.70, 1.05)        | 0.20 |
| Madagascar | MAHAY (29)                                 | ASQI     | 1613        | 1604         | 0.91 (0.58, 1.44)        | 0.08 |
| Zimbabwe   | SHINE <sup>1</sup> (HIV-) (33), LNS vs SOC | MDAT     | 395         | 382          | 1.08 (0.67, 1.73)        | 0.13 |
| Zimbabwe   | LNS+WSH vs WSH                             | MDAT     | 446         | 417          | 0.82 (0.54, 1.24)        | 0.13 |
| Zimbabwe   | SHINE <sup>1</sup> (HIV+) (34), LNS vs SOC | MDAT     | 67          | 68           | 1.16 (0.44, 3.08)        | 0.05 |
| Zimbabwe   | LNS+WSH vs WSH                             | MDAT     | 103         | 83           | 0.40 (0.17, 0.95)        | 0.05 |
|            |                                            |          | <b>7363</b> | <b>12075</b> | <b>0.88 (0.79, 0.98)</b> |      |

**I<sup>2</sup> = 0.00, Tau<sup>2</sup> = 0.00**

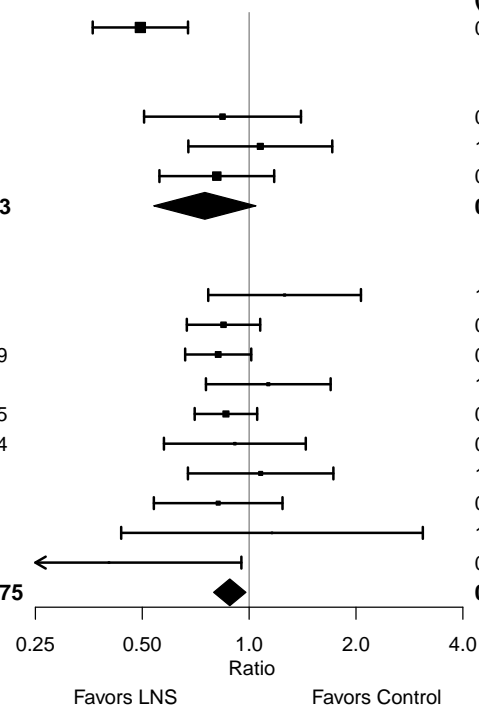

Supplemental figure 4H: Motor lowest decile prevalence ratio

4H5: Stratified by Source water quality

Source water quality  
(p-diff = 0.303)

Source water quality – Improved

| Country    | Trial            | Tool     | N           | N           |
|------------|------------------|----------|-------------|-------------|
| Bangladesh | JiVitA-4 (21)    | BSID-III | 445         | 143         |
| Bangladesh | RDNS (22)        | DMC      | 1556        | 753         |
| Bangladesh | WASH-B (23)      | EASQ     | 528         | 1099        |
| Ghana      | GHANA (25)       |          |             |             |
| Ghana      | iLiNS-DYADG (26) | KDI      | 302         | 601         |
| Haiti      | HAITI (27)       |          |             |             |
| Malawi     | iLiNS-DYADM (30) | KDI      | 214         | 436         |
| Malawi     | iLiNS-DOSE (31)  | KDI      | 646         | 221         |
|            |                  |          | <b>3691</b> | <b>3253</b> |

I<sup>2</sup> = 0.00, Tau<sup>2</sup> = 0.00

Source water quality – Unimproved

|              |                   |      |             |             |
|--------------|-------------------|------|-------------|-------------|
| Burkina Faso | iLiNS-Zinc (24)   | DMC  | 746         | 375         |
| Kenya        | WASH-B (28)       | EASQ | 649         | 2073        |
| Madagascar   | MAHAY (29)        | ASQI | 1613        | 1604        |
| Mali         | PROMIS CS (32)    | DMC  | 902         | 921         |
| Zimbabwe     | SHINE (HIV-) (33) | MDAT | 395         | 382         |
| Zimbabwe     | SHINE (HIV+) (34) | MDAT | 67          | 68          |
|              |                   |      | <b>4372</b> | <b>5423</b> |

I<sup>2</sup> = 0.62, Tau<sup>2</sup> = 0.05

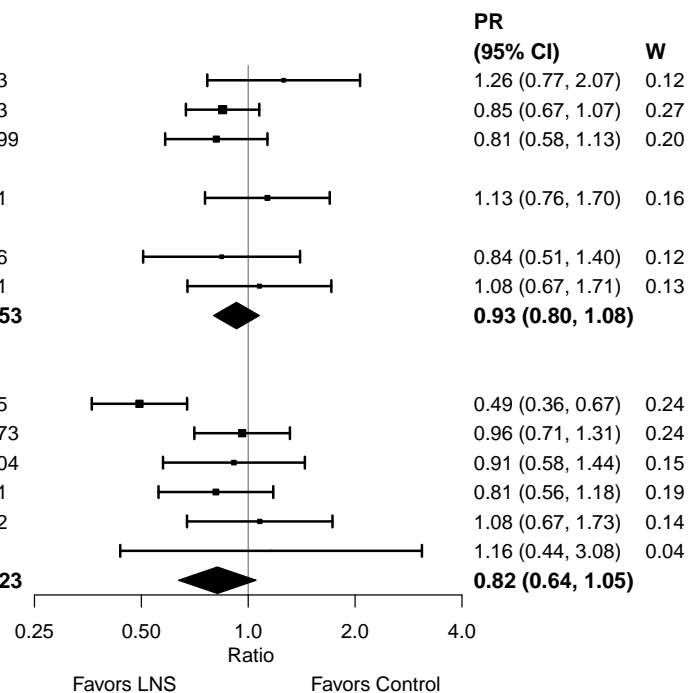



Supplemental figure 4H: Motor lowest decile prevalence ratio

4H6: Stratified by Sanitation

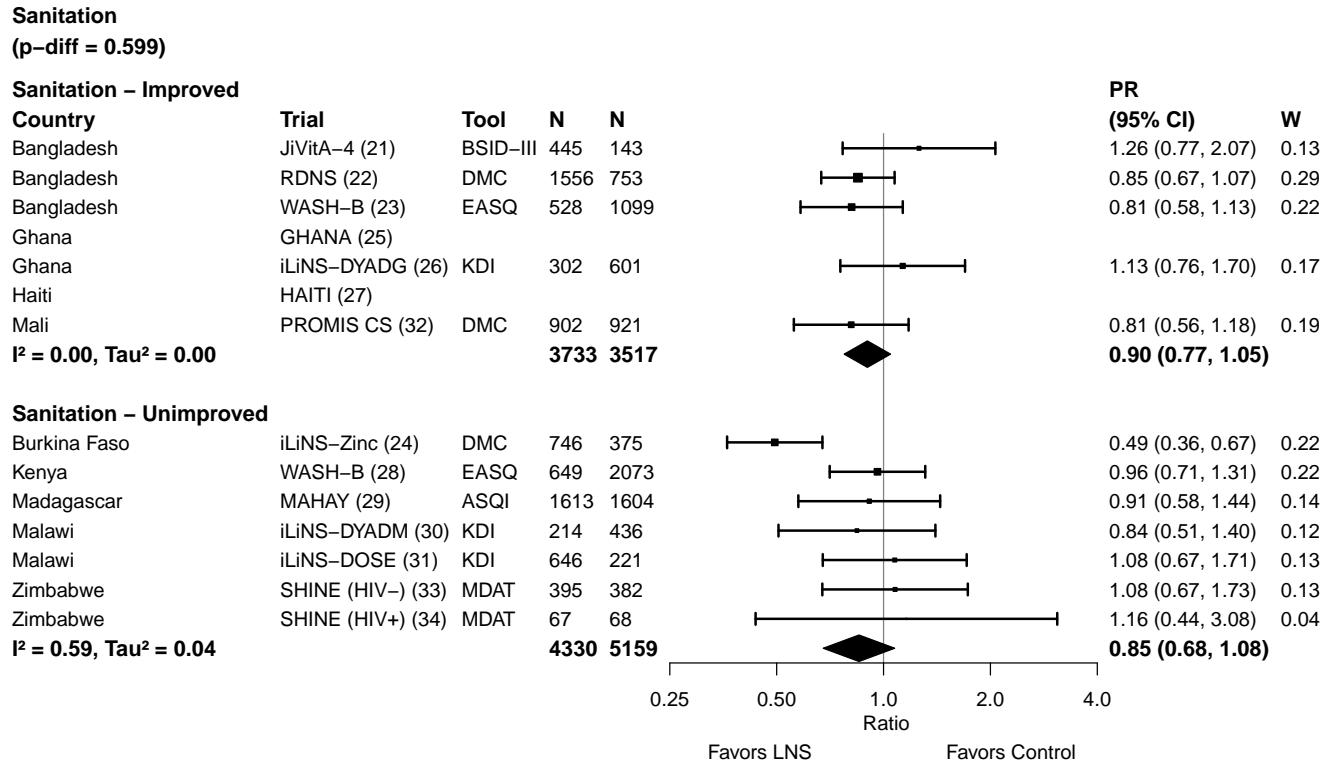

Supplemental figure 4H: Motor lowest decile prevalence ratio

4H7: Stratified by Supplement duration

Supplement duration  
(p-diff = 0.839)

Supplement duration – 12m or less

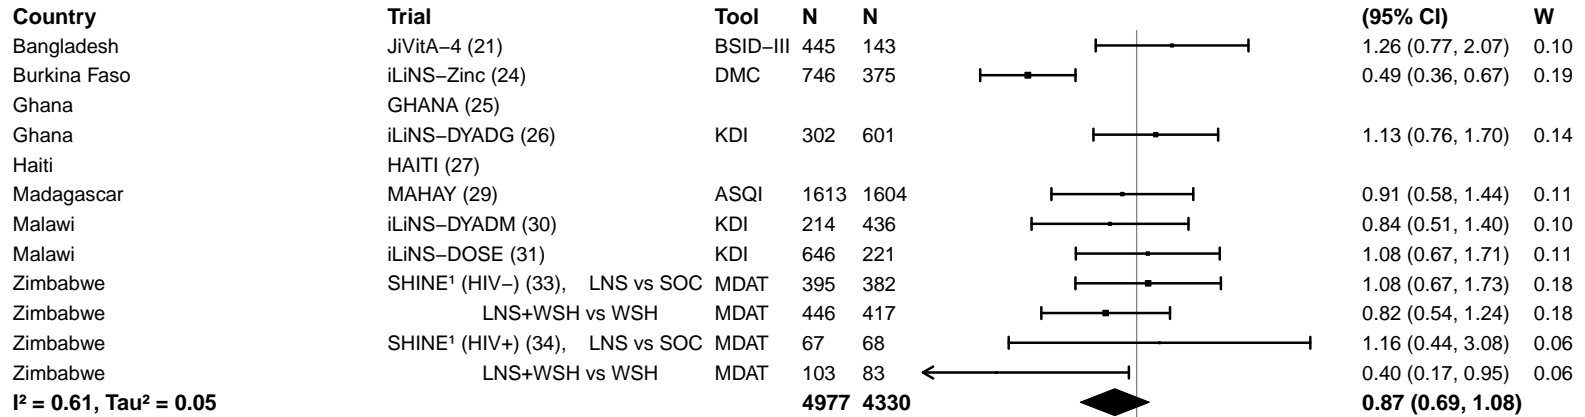

Supplement duration – > 12m

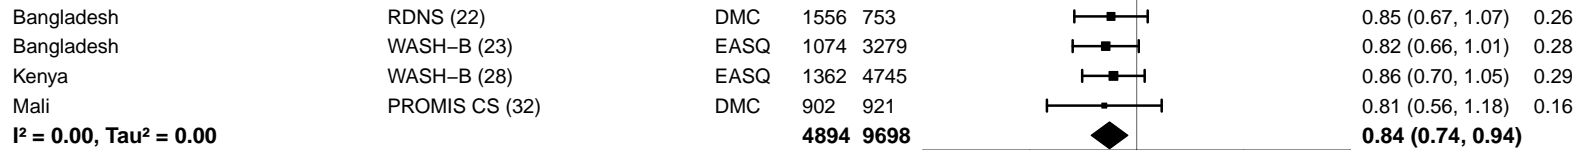

Supplemental figure 4H: Motor lowest decile prevalence ratio

4H8: Stratified by Frequency of contact

Frequency of contact  
(p-diff = 0.977)

Frequency of contact – Monthly

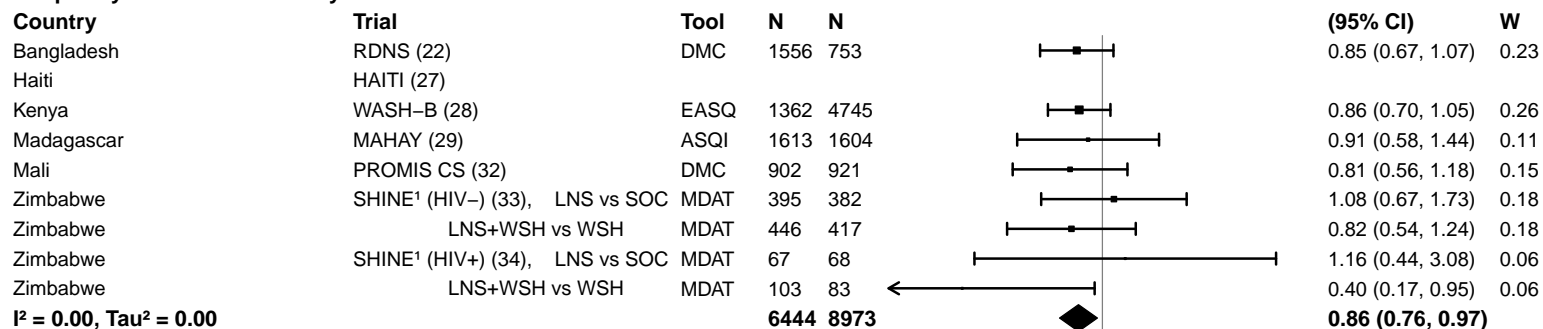

I<sup>2</sup> = 0.00, Tau<sup>2</sup> = 0.00

Frequency of contact – Weekly

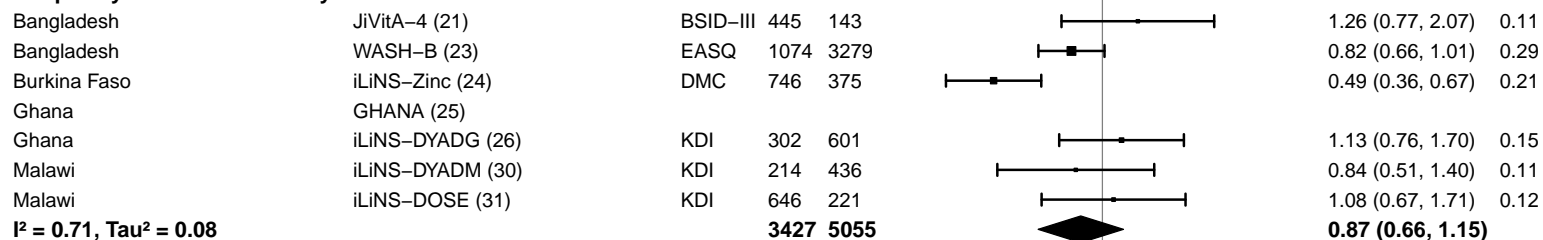

I<sup>2</sup> = 0.71, Tau<sup>2</sup> = 0.08

Supplemental figure 4H: Motor lowest decile prevalence ratio

4H9: Stratified by Average SQ-LNS compliance

**Average SQ-LNS compliance**  
(p-diff = 0.330)

**Average SQ-LNS compliance – Low**

| Country  | Trial                                      | Tool | N           | N           | PR<br>(95% CI)           | W    |
|----------|--------------------------------------------|------|-------------|-------------|--------------------------|------|
| Ghana    | iLiNS-DYADG (26)                           | KDI  | 302         | 601         | 1.13 (0.76, 1.70)        | 0.18 |
| Malawi   | iLiNS-DYADM (30)                           | KDI  | 214         | 436         | 0.84 (0.51, 1.40)        | 0.13 |
| Malawi   | iLiNS-DOSE (31)                            | KDI  | 646         | 221         | 1.08 (0.67, 1.71)        | 0.15 |
| Mali     | PROMIS CS (32)                             | DMC  | 902         | 921         | 0.81 (0.56, 1.18)        | 0.20 |
| Zimbabwe | SHINE <sup>1</sup> (HIV-) (33), LNS vs SOC | MDAT | 395         | 382         | 1.08 (0.67, 1.73)        | 0.24 |
| Zimbabwe | LNS+WSH vs WSH                             | MDAT | 446         | 417         | 0.82 (0.54, 1.24)        | 0.24 |
| Zimbabwe | SHINE <sup>1</sup> (HIV+) (34), LNS vs SOC | MDAT | 67          | 68          | 1.16 (0.44, 3.08)        | 0.09 |
| Zimbabwe | LNS+WSH vs WSH                             | MDAT | 103         | 83          | 0.40 (0.17, 0.95)        | 0.09 |
|          |                                            |      | <b>3075</b> | <b>3129</b> | <b>0.92 (0.78, 1.09)</b> |      |

**I<sup>2</sup> = 0.00, Tau<sup>2</sup> = 0.00**

**Average SQ-LNS compliance – High**

|              |                 |          |             |             |                          |      |
|--------------|-----------------|----------|-------------|-------------|--------------------------|------|
| Bangladesh   | JiVitA-4 (21)   | BSID-III | 445         | 143         | 1.26 (0.77, 2.07)        | 0.10 |
| Bangladesh   | RDNS (22)       | DMC      | 1556        | 753         | 0.85 (0.67, 1.07)        | 0.23 |
| Bangladesh   | WASH-B (23)     | EASQ     | 1074        | 3279        | 0.82 (0.66, 1.01)        | 0.24 |
| Burkina Faso | iLiNS-Zinc (24) | DMC      | 746         | 375         | 0.49 (0.36, 0.67)        | 0.18 |
| Ghana        | GHANA (25)      |          |             |             |                          |      |
| Haiti        | HAITI (27)      |          |             |             |                          |      |
| Kenya        | WASH-B (28)     | EASQ     | 1362        | 4745        | 0.86 (0.70, 1.05)        | 0.25 |
|              |                 |          | <b>5183</b> | <b>9295</b> | <b>0.80 (0.61, 1.05)</b> |      |

**I<sup>2</sup> = 0.70, Tau<sup>2</sup> = 0.07**

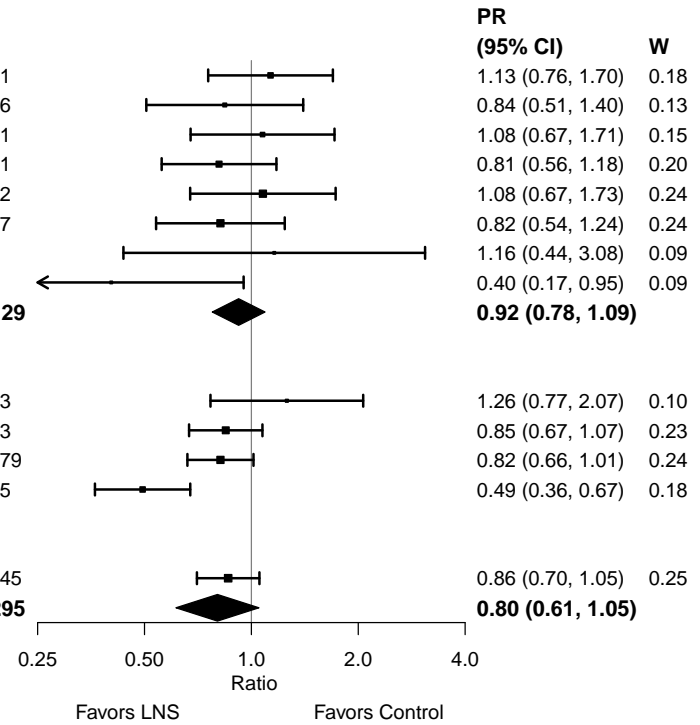

## Supplemental figure 4I: Motor lowest decile prevalence difference

### 4I1: Stratified by Geographic region

**Geographic region**  
( $p$ -diff = 0.995)

**Geographic region – SEAR**

| Country    | Trial         | Tool     | N           | N           |
|------------|---------------|----------|-------------|-------------|
| Bangladesh | JiVitA-4 (21) | BSID-III | 445         | 143         |
| Bangladesh | RDNS (22)     | DMC      | 1556        | 753         |
| Bangladesh | WASH-B (23)   | EASQ     | 1074        | 3279        |
|            |               |          | <b>3075</b> | <b>4175</b> |

$I^2 = 0.00$ ,  $\text{Tau}^2 = 0.00$

**Geographic region – AFR**

|              |                                            |      |             |             |
|--------------|--------------------------------------------|------|-------------|-------------|
| Burkina Faso | iLiNS-Zinc (24)                            | DMC  | 746         | 375         |
| Ghana        | GHANA (25)                                 |      |             |             |
| Ghana        | iLiNS-DYADG (26)                           | KDI  | 302         | 601         |
| Kenya        | WASH-B (28)                                | EASQ | 1362        | 4745        |
| Madagascar   | MAHAY (29)                                 | ASQI | 1613        | 1604        |
| Malawi       | iLiNS-DYADM (30)                           | KDI  | 214         | 436         |
| Malawi       | iLiNS-DOSE (31)                            | KDI  | 646         | 221         |
| Mali         | PROMIS CS (32)                             | DMC  | 902         | 921         |
| Zimbabwe     | SHINE <sup>1</sup> (HIV-) (33), LNS vs SOC | MDAT | 395         | 382         |
| Zimbabwe     | LNS+WSH vs WSH                             | MDAT | 446         | 417         |
| Zimbabwe     | SHINE <sup>1</sup> (HIV+) (34), LNS vs SOC | MDAT | 67          | 68          |
| Zimbabwe     | LNS+WSH vs WSH                             | MDAT | 103         | 83          |
|              |                                            |      | <b>6796</b> | <b>9853</b> |

$I^2 = 0.37$ ,  $\text{Tau}^2 = 0.00$

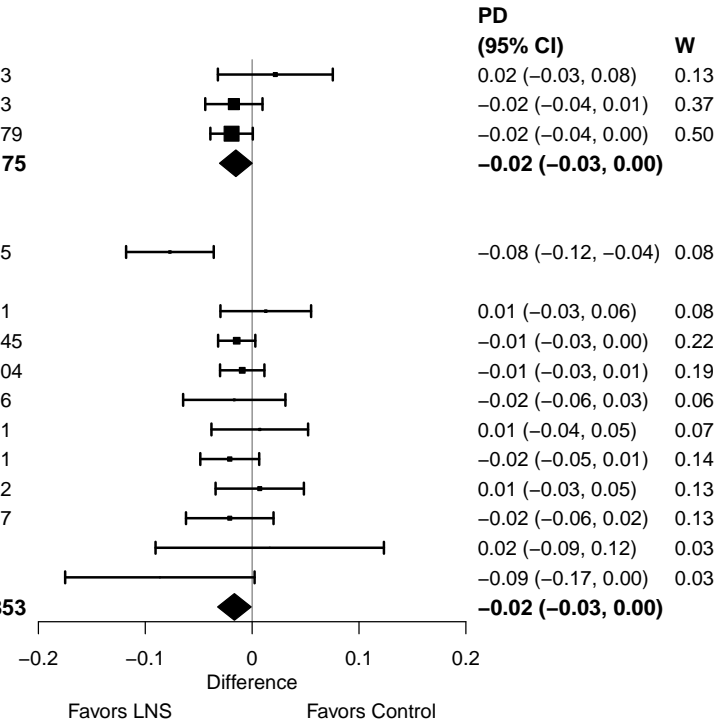

Supplemental figure 4I: Motor lowest decile prevalence difference

4I2: Stratified by Stunting burden

**Stunting burden**

( $p$ -diff = 0.537)

**Stunting burden – Less than 35%**

| Country                                             | Trial            | Tool | N    | N    | PD (95% CI)                | W    |
|-----------------------------------------------------|------------------|------|------|------|----------------------------|------|
| Ghana                                               | GHANA (25)       |      |      |      |                            |      |
| Ghana                                               | iLiNS-DYADG (26) | KDI  | 302  | 601  | 0.01 (-0.03, 0.06)         | 0.21 |
| Haiti                                               | HAITI (27)       |      |      |      |                            |      |
| Kenya                                               | WASH-B (28)      | EASQ | 1362 | 4745 | -0.01 (-0.03, 0.00)        | 0.61 |
| Malawi                                              | iLiNS-DYADM (30) | KDI  | 214  | 436  | -0.02 (-0.06, 0.03)        | 0.17 |
| <b><math>I^2 = 0.00, \text{Tau}^2 = 0.00</math></b> |                  |      |      |      | <b>-0.01 (-0.03, 0.00)</b> |      |

**Stunting burden – More than 35%**

|                                                     |                                            |          |      |      |                            |      |
|-----------------------------------------------------|--------------------------------------------|----------|------|------|----------------------------|------|
| Bangladesh                                          | JiVitA-4 (21)                              | BSID-III | 445  | 143  | 0.02 (-0.03, 0.08)         | 0.05 |
| Bangladesh                                          | RDNS (22)                                  | DMC      | 1556 | 753  | -0.02 (-0.04, 0.01)        | 0.14 |
| Bangladesh                                          | WASH-B (23)                                | EASQ     | 1074 | 3279 | -0.02 (-0.04, 0.00)        | 0.19 |
| Burkina Faso                                        | iLiNS-Zinc (24)                            | DMC      | 746  | 375  | -0.08 (-0.12, -0.04)       | 0.08 |
| Madagascar                                          | MAHAY (29)                                 | ASQI     | 1613 | 1604 | -0.01 (-0.03, 0.01)        | 0.18 |
| Malawi                                              | iLiNS-DOSE (31)                            | KDI      | 646  | 221  | 0.01 (-0.04, 0.05)         | 0.07 |
| Mali                                                | PROMIS CS (32)                             | DMC      | 902  | 921  | -0.02 (-0.05, 0.01)        | 0.13 |
| Zimbabwe                                            | SHINE <sup>1</sup> (HIV-) (33), LNS vs SOC | MDAT     | 395  | 382  | 0.01 (-0.03, 0.05)         | 0.13 |
| Zimbabwe                                            | LNS+WSH vs WSH                             | MDAT     | 446  | 417  | -0.02 (-0.06, 0.02)        | 0.13 |
| Zimbabwe                                            | SHINE <sup>1</sup> (HIV+) (34), LNS vs SOC | MDAT     | 67   | 68   | 0.02 (-0.09, 0.12)         | 0.03 |
| Zimbabwe                                            | LNS+WSH vs WSH                             | MDAT     | 103  | 83   | -0.09 (-0.17, 0.00)        | 0.03 |
| <b><math>I^2 = 0.38, \text{Tau}^2 = 0.00</math></b> |                                            |          |      |      | <b>-0.02 (-0.03, 0.00)</b> |      |

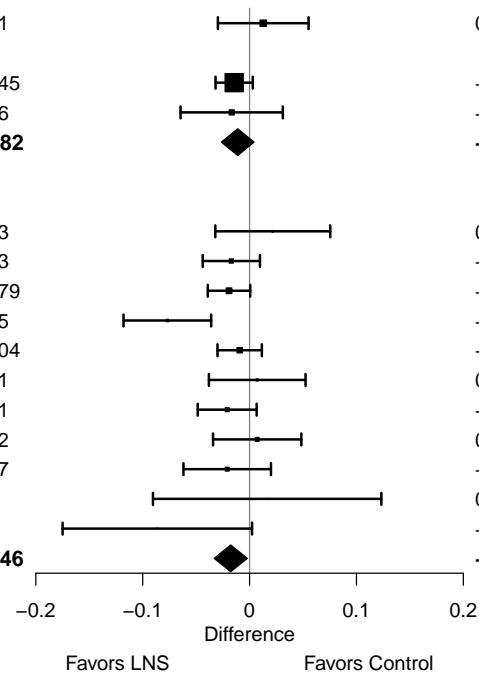

Supplemental figure 4I: Motor lowest decile prevalence difference

4I3: Stratified by Malaria prevalence

**Malaria prevalence**  
(p-diff = 0.476)

**Malaria prevalence – Less than 10%**

| Country    | Trial                                      | Tool     | N           | N            |
|------------|--------------------------------------------|----------|-------------|--------------|
| Bangladesh | JiVitA-4 (21)                              | BSID-III | 445         | 143          |
| Bangladesh | RDNS (22)                                  | DMC      | 1556        | 753          |
| Bangladesh | WASH-B (23)                                | EASQ     | 1074        | 3279         |
| Haiti      | HAITI (27)                                 |          |             |              |
| Kenya      | WASH-B (28)                                | EASQ     | 1362        | 4745         |
| Madagascar | MAHAY (29)                                 | ASQI     | 1613        | 1604         |
| Zimbabwe   | SHINE <sup>1</sup> (HIV-) (33), LNS vs SOC | MDAT     | 395         | 382          |
| Zimbabwe   | LNS+WSH vs WSH                             | MDAT     | 446         | 417          |
| Zimbabwe   | SHINE <sup>1</sup> (HIV+) (34), LNS vs SOC | MDAT     | 67          | 68           |
| Zimbabwe   | LNS+WSH vs WSH                             | MDAT     | 103         | 83           |
|            |                                            |          | <b>7061</b> | <b>11474</b> |

**I<sup>2</sup> = 0.00, Tau<sup>2</sup> = 0.00**

**Malaria prevalence – At least 10%**

|              |                  |     |             |             |
|--------------|------------------|-----|-------------|-------------|
| Burkina Faso | iLiNS-Zinc (24)  | DMC | 746         | 375         |
| Ghana        | GHANA (25)       |     |             |             |
| Ghana        | iLiNS-DYADG (26) | KDI | 302         | 601         |
| Malawi       | iLiNS-DYADM (30) | KDI | 214         | 436         |
| Malawi       | iLiNS-DOSE (31)  | KDI | 646         | 221         |
| Mali         | PROMIS CS (32)   | DMC | 902         | 921         |
|              |                  |     | <b>2810</b> | <b>2554</b> |

**I<sup>2</sup> = 0.64, Tau<sup>2</sup> = 0.00**

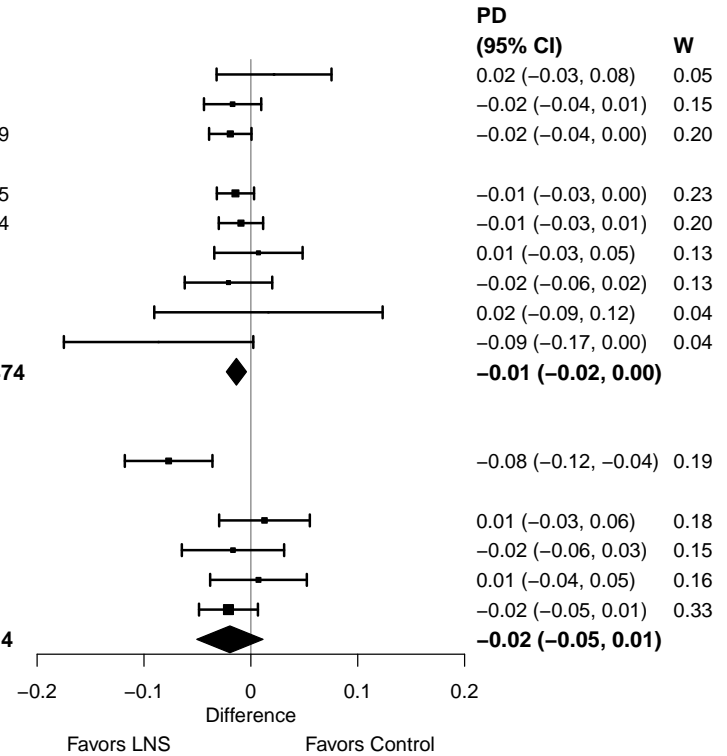

Supplemental figure 4I: Motor lowest decile prevalence difference

4I4: Stratified by Anemia prevalence

Anemia prevalence  
(p-diff = 0.163)

Anemia prevalence – High

| Country      | Trial            | Tool | N           | N           |
|--------------|------------------|------|-------------|-------------|
| Burkina Faso | iLiNS-Zinc (24)  | DMC  | 746         | 375         |
| Ghana        | GHANA (25)       |      |             |             |
| Haiti        | HAITI (27)       |      |             |             |
| Malawi       | iLiNS-DYADM (30) | KDI  | 214         | 436         |
| Malawi       | iLiNS-DOSE (31)  | KDI  | 646         | 221         |
| Mali         | PROMIS CS (32)   | DMC  | 902         | 921         |
|              |                  |      | <b>2508</b> | <b>1953</b> |

I<sup>2</sup> = 0.64, Tau<sup>2</sup> = 0.00

Anemia prevalence – Moderate

|            |                                            |          |             |              |
|------------|--------------------------------------------|----------|-------------|--------------|
| Bangladesh | JiVitA-4 (21)                              | BSID-III | 445         | 143          |
| Bangladesh | RDNS (22)                                  | DMC      | 1556        | 753          |
| Bangladesh | WASH-B (23)                                | EASQ     | 1074        | 3279         |
| Ghana      | iLiNS-DYADG (26)                           | KDI      | 302         | 601          |
| Kenya      | WASH-B (28)                                | EASQ     | 1362        | 4745         |
| Madagascar | MAHAY (29)                                 | ASQI     | 1613        | 1604         |
| Zimbabwe   | SHINE <sup>1</sup> (HIV-) (33), LNS vs SOC | MDAT     | 395         | 382          |
| Zimbabwe   | LNS+WSH vs WSH                             | MDAT     | 446         | 417          |
| Zimbabwe   | SHINE <sup>1</sup> (HIV+) (34), LNS vs SOC | MDAT     | 67          | 68           |
| Zimbabwe   | LNS+WSH vs WSH                             | MDAT     | 103         | 83           |
|            |                                            |          | <b>7363</b> | <b>12075</b> |

I<sup>2</sup> = 0.00, Tau<sup>2</sup> = 0.00

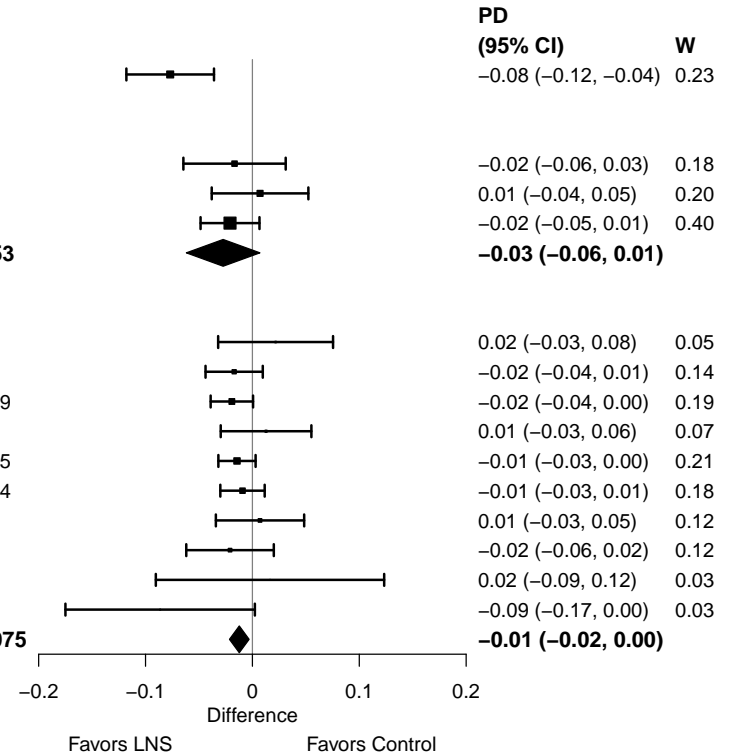



Supplemental figure 4I: Motor lowest decile prevalence difference

4I5: Stratified by Source water quality

Source water quality  
(p-diff = 0.444)

Source water quality – Improved

| Country                                             | Trial            | Tool     | N           | N           |
|-----------------------------------------------------|------------------|----------|-------------|-------------|
| Bangladesh                                          | JiVitA-4 (21)    | BSID-III | 445         | 143         |
| Bangladesh                                          | RDNS (22)        | DMC      | 1556        | 753         |
| Bangladesh                                          | WASH-B (23)      | EASQ     | 528         | 1099        |
| Ghana                                               | GHANA (25)       |          |             |             |
| Ghana                                               | iLiNS-DYADG (26) | KDI      | 302         | 601         |
| Haiti                                               | HAITI (27)       |          |             |             |
| Malawi                                              | iLiNS-DYADM (30) | KDI      | 214         | 436         |
| Malawi                                              | iLiNS-DOSE (31)  | KDI      | 646         | 221         |
| <b>I<sup>2</sup> = 0.00, Tau<sup>2</sup> = 0.00</b> |                  |          | <b>3691</b> | <b>3253</b> |

Source water quality – Unimproved

|                                                     |                   |      |             |             |
|-----------------------------------------------------|-------------------|------|-------------|-------------|
| Burkina Faso                                        | iLiNS-Zinc (24)   | DMC  | 746         | 375         |
| Kenya                                               | WASH-B (28)       | EASQ | 649         | 2073        |
| Madagascar                                          | MAHAY (29)        | ASQI | 1613        | 1604        |
| Mali                                                | PROMIS CS (32)    | DMC  | 902         | 921         |
| Zimbabwe                                            | SHINE (HIV-) (33) | MDAT | 395         | 382         |
| Zimbabwe                                            | SHINE (HIV+) (34) | MDAT | 67          | 68          |
| <b>I<sup>2</sup> = 0.56, Tau<sup>2</sup> = 0.00</b> |                   |      | <b>4372</b> | <b>5423</b> |

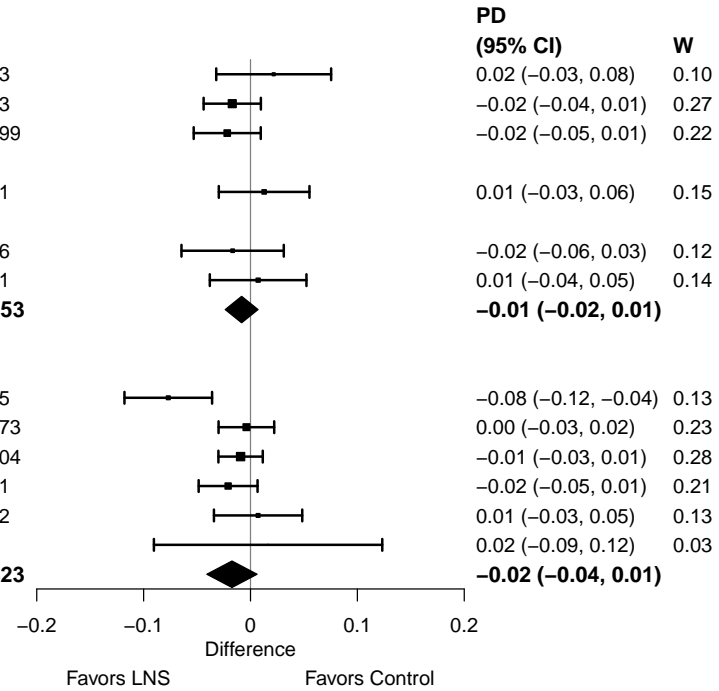

Supplemental figure 4I: Motor lowest decile prevalence difference

4I6: Stratified by Sanitation

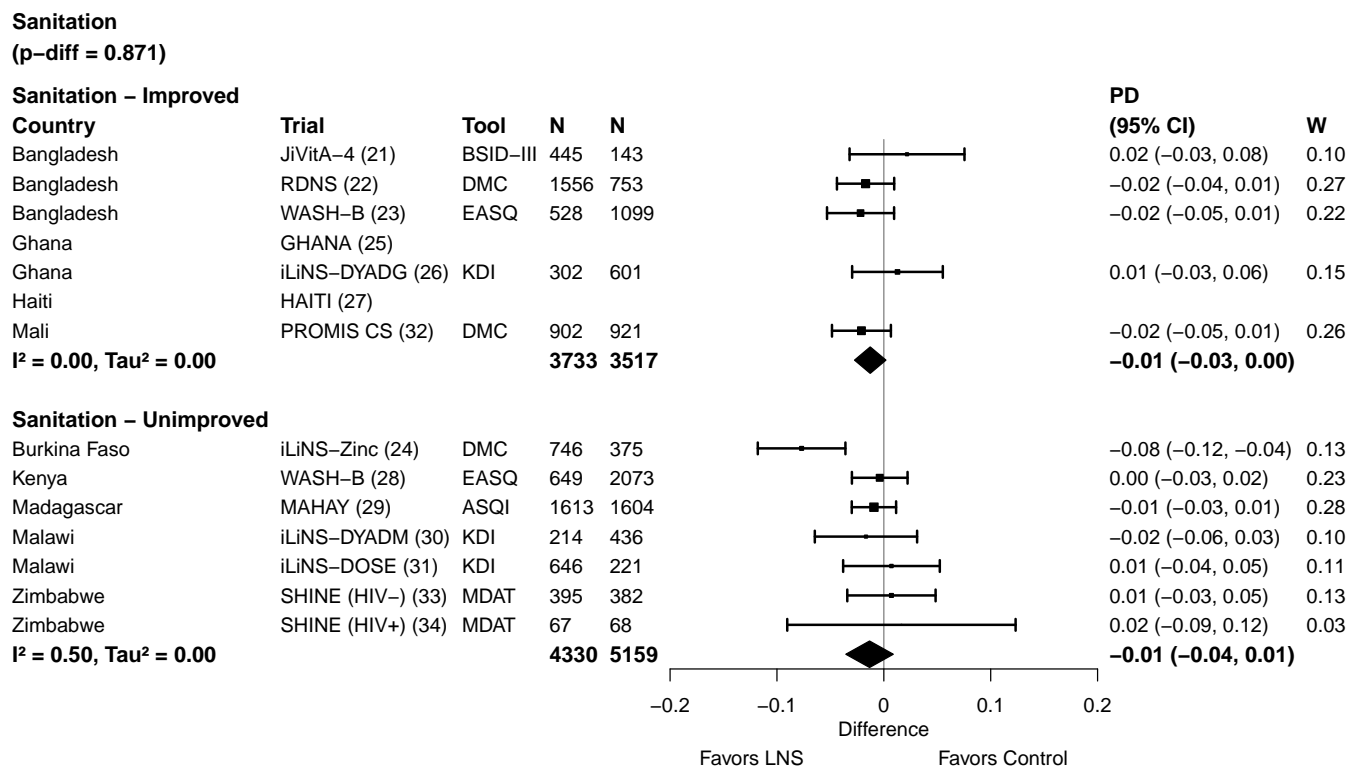

Supplemental figure 4I: Motor lowest decile prevalence difference

4I7: Stratified by Supplement duration

Supplement duration  
( $p$ -diff = 0.553)

Supplement duration – 12m or less

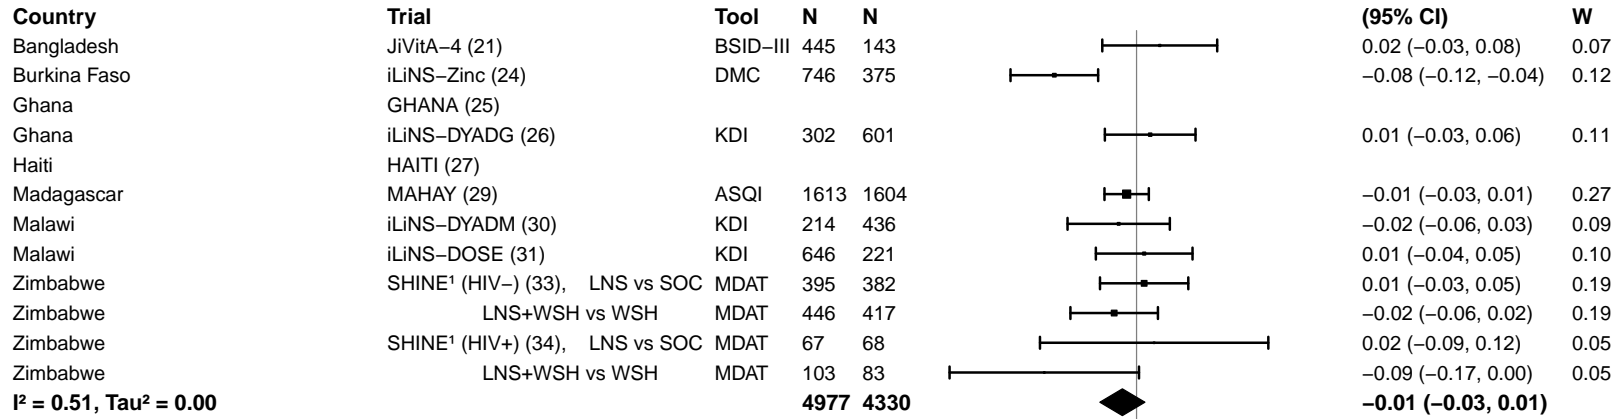

Supplement duration – > 12m

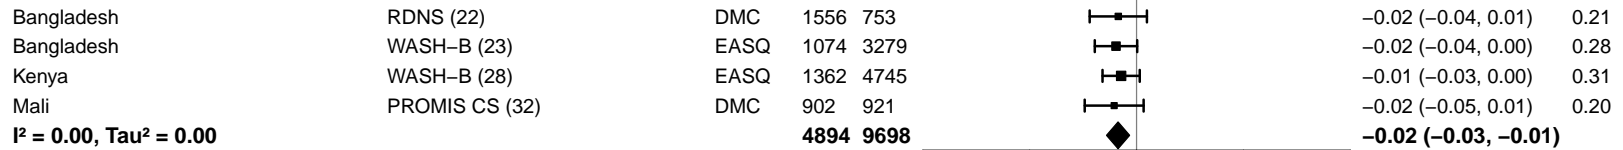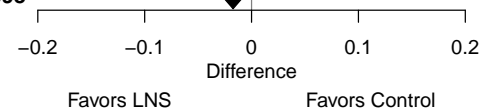

Supplemental figure 4I: Motor lowest decile prevalence difference

4I8: Stratified by Frequency of contact

**Frequency of contact**  
(p-diff = 0.780)

**Frequency of contact – Monthly**

| Country                                             | Trial                                      | Tool | N           | N           | PD (95% CI)                | W    |
|-----------------------------------------------------|--------------------------------------------|------|-------------|-------------|----------------------------|------|
| Bangladesh                                          | RDNS (22)                                  | DMC  | 1556        | 753         | -0.02 (-0.04, 0.01)        | 0.17 |
| Haiti                                               | HAITI (27)                                 |      |             |             |                            |      |
| Kenya                                               | WASH-B (28)                                | EASQ | 1362        | 4745        | -0.01 (-0.03, 0.00)        | 0.26 |
| Madagascar                                          | MAHAY (29)                                 | ASQI | 1613        | 1604        | -0.01 (-0.03, 0.01)        | 0.22 |
| Mali                                                | PROMIS CS (32)                             | DMC  | 902         | 921         | -0.02 (-0.05, 0.01)        | 0.16 |
| Zimbabwe                                            | SHINE <sup>1</sup> (HIV-) (33), LNS vs SOC | MDAT | 395         | 382         | 0.01 (-0.03, 0.05)         | 0.15 |
| Zimbabwe                                            | LNS+WSH vs WSH                             | MDAT | 446         | 417         | -0.02 (-0.06, 0.02)        | 0.15 |
| Zimbabwe                                            | SHINE <sup>1</sup> (HIV+) (34), LNS vs SOC | MDAT | 67          | 68          | 0.02 (-0.09, 0.12)         | 0.04 |
| Zimbabwe                                            | LNS+WSH vs WSH                             | MDAT | 103         | 83          | -0.09 (-0.17, 0.00)        | 0.04 |
| <b>I<sup>2</sup> = 0.00, Tau<sup>2</sup> = 0.00</b> |                                            |      | <b>6444</b> | <b>8973</b> | <b>-0.01 (-0.02, 0.00)</b> |      |

**Frequency of contact – Weekly**

|                                                     |                  |          |             |             |                            |      |
|-----------------------------------------------------|------------------|----------|-------------|-------------|----------------------------|------|
| Bangladesh                                          | JiVitA-4 (21)    | BSID-III | 445         | 143         | 0.02 (-0.03, 0.08)         | 0.10 |
| Bangladesh                                          | WASH-B (23)      | EASQ     | 1074        | 3279        | -0.02 (-0.04, 0.00)        | 0.37 |
| Burkina Faso                                        | iLiNS-Zinc (24)  | DMC      | 746         | 375         | -0.08 (-0.12, -0.04)       | 0.15 |
| Ghana                                               | GHANA (25)       |          |             |             |                            |      |
| Ghana                                               | iLiNS-DYADG (26) | KDI      | 302         | 601         | 0.01 (-0.03, 0.06)         | 0.14 |
| Malawi                                              | iLiNS-DYADM (30) | KDI      | 214         | 436         | -0.02 (-0.06, 0.03)        | 0.12 |
| Malawi                                              | iLiNS-DOSE (31)  | KDI      | 646         | 221         | 0.01 (-0.04, 0.05)         | 0.13 |
| <b>I<sup>2</sup> = 0.62, Tau<sup>2</sup> = 0.00</b> |                  |          | <b>3427</b> | <b>5055</b> | <b>-0.01 (-0.04, 0.01)</b> |      |

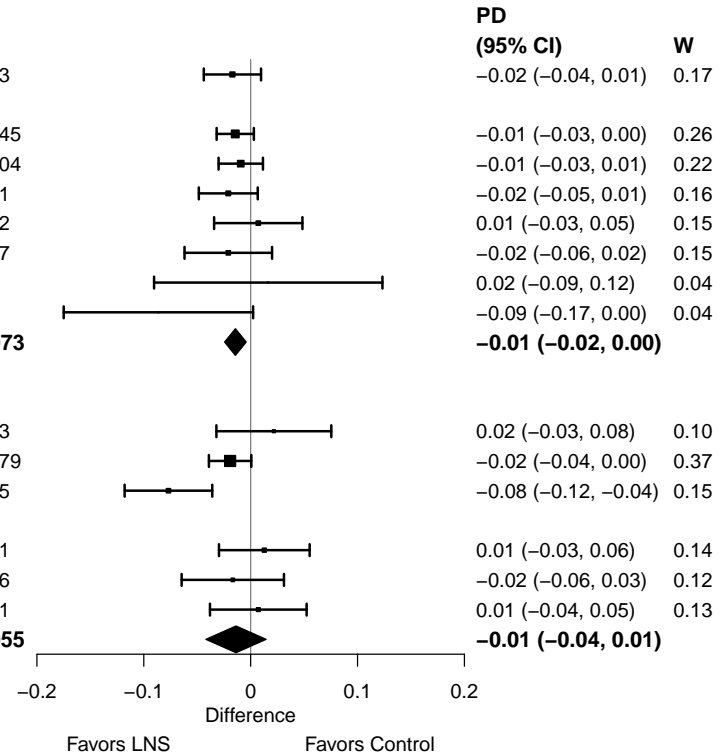

Supplemental figure 4I: Motor lowest decile prevalence difference

4I9: Stratified by Average SQ-LNS compliance

**Average SQ-LNS compliance**  
(p-diff = 0.342)

**Average SQ-LNS compliance – Low**

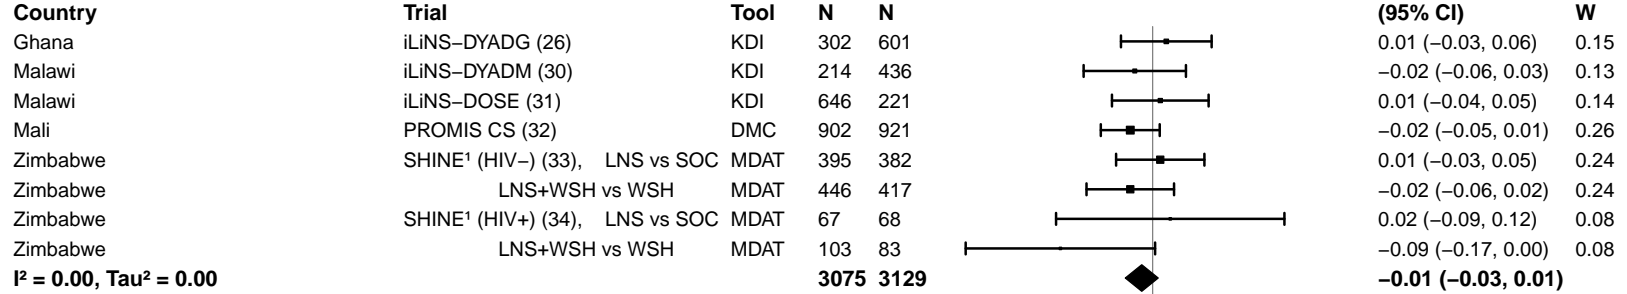

**Average SQ-LNS compliance – High**

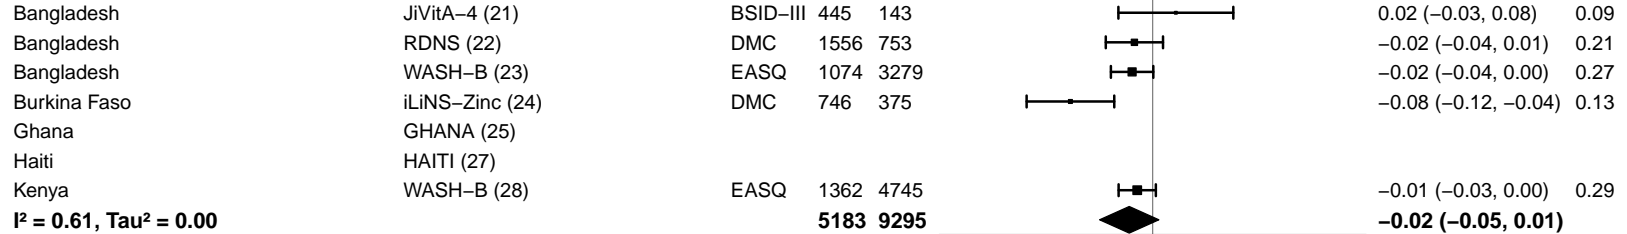

## Supplemental figure 4J: Mean difference in gross motor z-score

### 4J1: Stratified by Geographic region

#### Geographic region

(p-diff = 0.929)

#### Geographic region – SEAR

| Country    | Trial         | Tool     | N           | N           |
|------------|---------------|----------|-------------|-------------|
| Bangladesh | JiVitA-4 (21) | BSID-III | 445         | 143         |
| Bangladesh | RDNS (22)     | DMC      | 1570        | 758         |
| Bangladesh | WASH-B (23)   | EASQ     | 1074        | 3279        |
|            |               |          | <b>3089</b> | <b>4180</b> |

$I^2 = 0.66$ ,  $\text{Tau}^2 = 0.01$

#### Geographic region – AFR

|              |                                            |      |             |             |
|--------------|--------------------------------------------|------|-------------|-------------|
| Burkina Faso | iLiNS-Zinc (24)                            | DMC  |             |             |
| Ghana        | GHANA (25)                                 |      |             |             |
| Ghana        | iLiNS-DYADG (26)                           | KDI  | 302         | 601         |
| Kenya        | WASH-B (28)                                | EASQ | 1362        | 4745        |
| Madagascar   | MAHAY (29)                                 | ASQI | 1613        | 1604        |
| Malawi       | iLiNS-DYADM (30)                           | KDI  | 214         | 436         |
| Malawi       | iLiNS-DOSE (31)                            | KDI  | 646         | 221         |
| Mali         | PROMIS CS (32)                             | DMC  | 940         | 957         |
| Zimbabwe     | SHINE <sup>1</sup> (HIV-) (33), LNS vs SOC | MDAT | 395         | 382         |
| Zimbabwe     | LNS+WSH vs WSH                             | MDAT | 446         | 417         |
| Zimbabwe     | SHINE <sup>1</sup> (HIV+) (34), LNS vs SOC | MDAT | 67          | 68          |
| Zimbabwe     | LNS+WSH vs WSH                             | MDAT | 103         | 83          |
|              |                                            |      | <b>6088</b> | <b>9514</b> |

$I^2 = 0.50$ ,  $\text{Tau}^2 = 0.01$

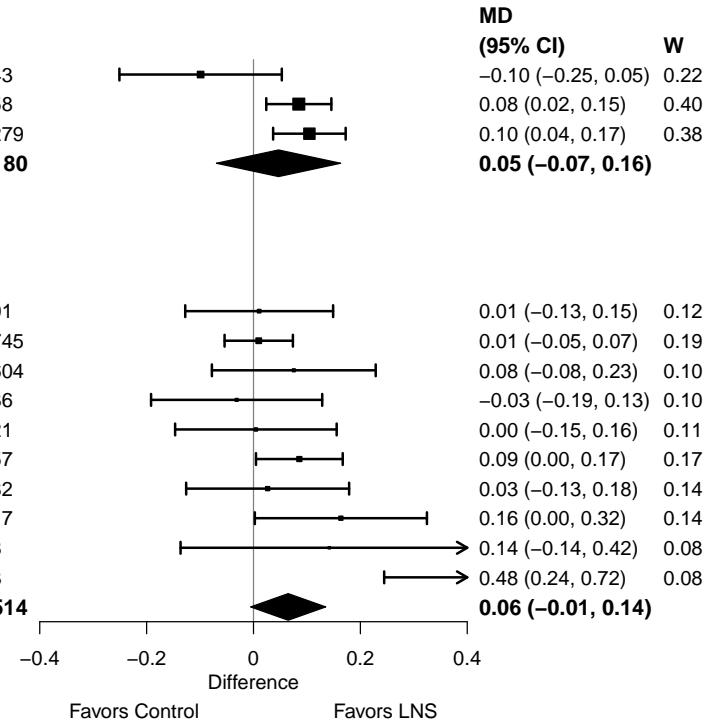

Supplemental figure 4J: Mean difference in gross motor z-score

4J2: Stratified by Stunting burden

**Stunting burden**  
(p-diff = 0.014)

**Stunting burden – Less than 35%**

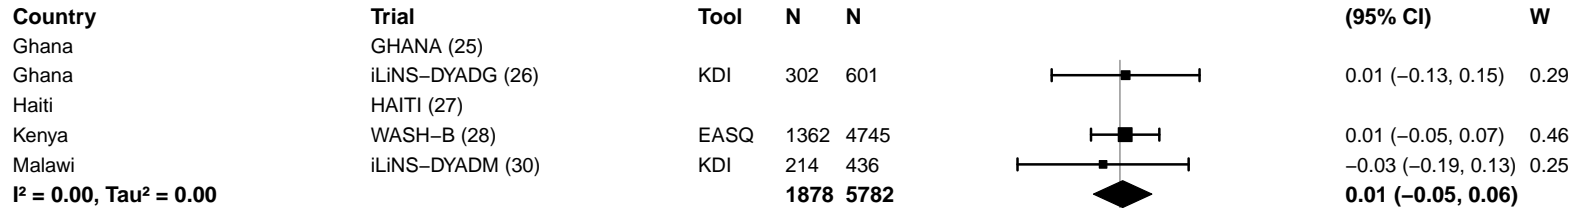

**Stunting burden – More than 35%**

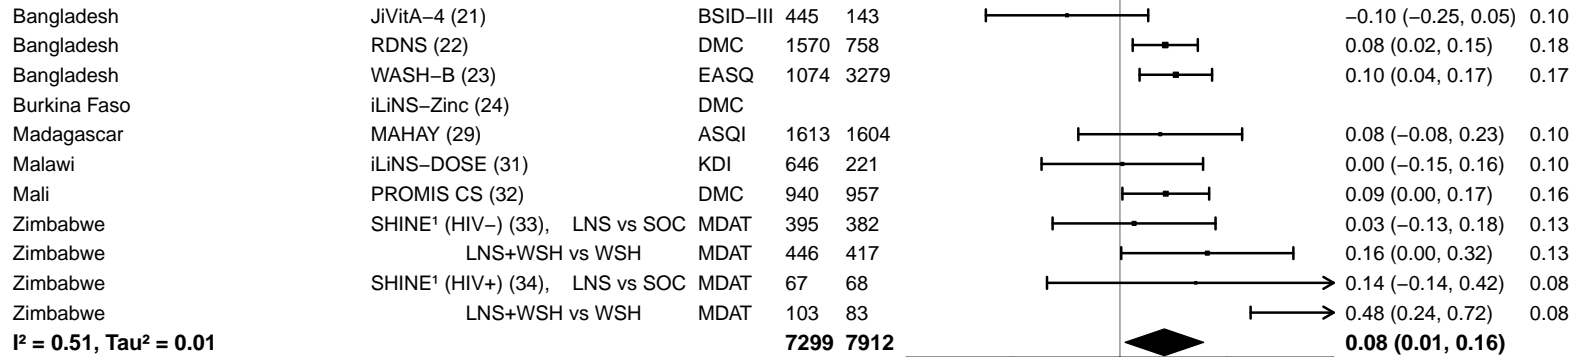

Supplemental figure 4J: Mean difference in gross motor z-score

4J3: Stratified by Malaria prevalence

**Malaria prevalence**  
(p-diff = 0.387)

**Malaria prevalence – Less than 10%**

| Country    | Trial                                      | Tool     | N           | N            |
|------------|--------------------------------------------|----------|-------------|--------------|
| Bangladesh | JiVitA-4 (21)                              | BSID-III | 445         | 143          |
| Bangladesh | RDNS (22)                                  | DMC      | 1570        | 758          |
| Bangladesh | WASH-B (23)                                | EASQ     | 1074        | 3279         |
| Haiti      | HAITI (27)                                 |          |             |              |
| Kenya      | WASH-B (28)                                | EASQ     | 1362        | 4745         |
| Madagascar | MAHAY (29)                                 | ASQI     | 1613        | 1604         |
| Zimbabwe   | SHINE <sup>1</sup> (HIV-) (33), LNS vs SOC | MDAT     | 395         | 382          |
| Zimbabwe   | LNS+WSH vs WSH                             | MDAT     | 446         | 417          |
| Zimbabwe   | SHINE <sup>1</sup> (HIV+) (34), LNS vs SOC | MDAT     | 67          | 68           |
| Zimbabwe   | LNS+WSH vs WSH                             | MDAT     | 103         | 83           |
|            |                                            |          | <b>7075</b> | <b>11479</b> |

**I<sup>2</sup> = 0.66, Tau<sup>2</sup> = 0.01**

**Malaria prevalence – At least 10%**

|              |                  |     |             |             |
|--------------|------------------|-----|-------------|-------------|
| Burkina Faso | iLiNS-Zinc (24)  | DMC |             |             |
| Ghana        | GHANA (25)       |     |             |             |
| Ghana        | iLiNS-DYADG (26) | KDI | 302         | 601         |
| Malawi       | iLiNS-DYADM (30) | KDI | 214         | 436         |
| Malawi       | iLiNS-DOSE (31)  | KDI | 646         | 221         |
| Mali         | PROMIS CS (32)   | DMC | 940         | 957         |
|              |                  |     | <b>2102</b> | <b>2215</b> |

**I<sup>2</sup> = 0.00, Tau<sup>2</sup> = 0.00**

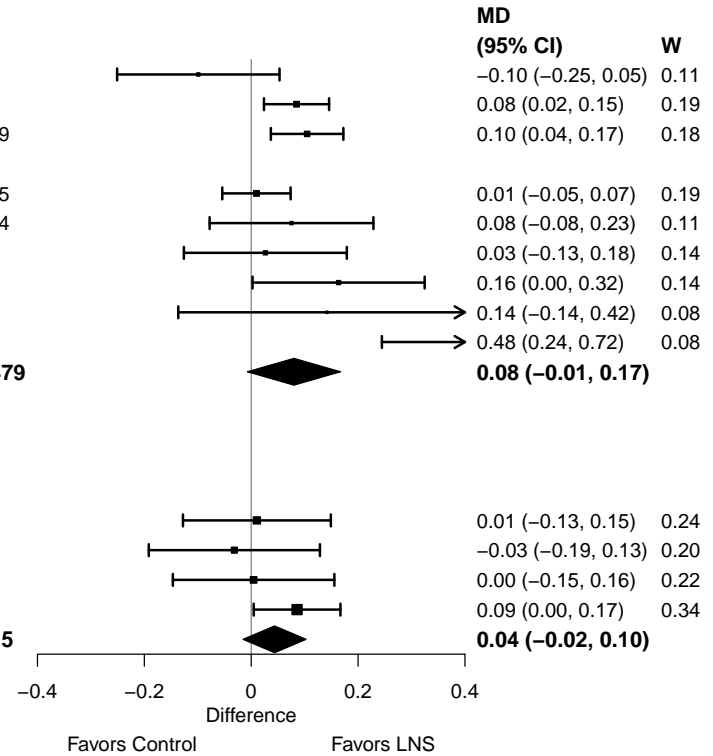



Supplemental figure 4J: Mean difference in gross motor z-score

4J4: Stratified by Anemia prevalence

**Anemia prevalence**  
(p-diff = 0.558)

**Anemia prevalence – High**

| Country      | Trial            | Tool | N           | N           |
|--------------|------------------|------|-------------|-------------|
| Burkina Faso | iLiNS–Zinc (24)  | DMC  |             |             |
| Ghana        | GHANA (25)       |      |             |             |
| Haiti        | HAITI (27)       |      |             |             |
| Malawi       | iLiNS–DYADM (30) | KDI  | 214         | 436         |
| Malawi       | iLiNS–DOSE (31)  | KDI  | 646         | 221         |
| Mali         | PROMIS CS (32)   | DMC  | 940         | 957         |
|              |                  |      | <b>1800</b> | <b>1614</b> |

**I<sup>2</sup> = 0.04, Tau<sup>2</sup> = 0.00**

**Anemia prevalence – Moderate**

|            |                                            |          |             |              |
|------------|--------------------------------------------|----------|-------------|--------------|
| Bangladesh | JiVitA–4 (21)                              | BSID–III | 445         | 143          |
| Bangladesh | RDNS (22)                                  | DMC      | 1570        | 758          |
| Bangladesh | WASH–B (23)                                | EASQ     | 1074        | 3279         |
| Ghana      | iLiNS–DYADG (26)                           | KDI      | 302         | 601          |
| Kenya      | WASH–B (28)                                | EASQ     | 1362        | 4745         |
| Madagascar | MAHAY (29)                                 | ASQI     | 1613        | 1604         |
| Zimbabwe   | SHINE <sup>1</sup> (HIV–) (33), LNS vs SOC | MDAT     | 395         | 382          |
| Zimbabwe   | LNS+WSH vs WSH                             | MDAT     | 446         | 417          |
| Zimbabwe   | SHINE <sup>1</sup> (HIV+) (34), LNS vs SOC | MDAT     | 67          | 68           |
| Zimbabwe   | LNS+WSH vs WSH                             | MDAT     | 103         | 83           |
|            |                                            |          | <b>7377</b> | <b>12080</b> |

**I<sup>2</sup> = 0.62, Tau<sup>2</sup> = 0.01**

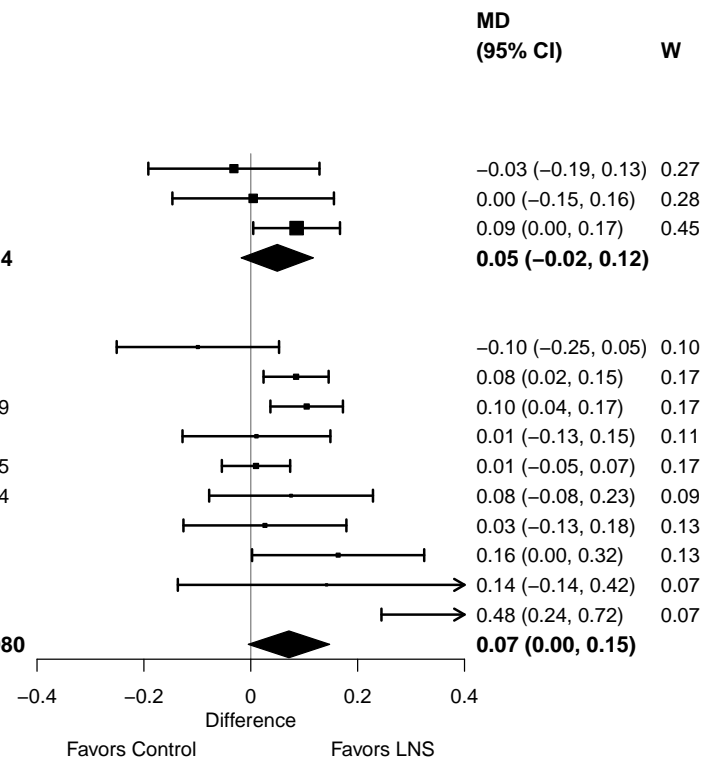

Supplemental figure 4J: Mean difference in gross motor z-score

4J5: Stratified by Source water quality

Source water quality  
(p-diff = 0.777)

Source water quality – Improved

| Country                                             | Trial            | Tool     | N           | N           |
|-----------------------------------------------------|------------------|----------|-------------|-------------|
| Bangladesh                                          | JiVitA-4 (21)    | BSID-III | 445         | 143         |
| Bangladesh                                          | RDNS (22)        | DMC      | 1570        | 758         |
| Bangladesh                                          | WASH-B (23)      | EASQ     | 528         | 1099        |
| Ghana                                               | GHANA (25)       |          |             |             |
| Ghana                                               | iLiNS-DYADG (26) | KDI      | 302         | 601         |
| Haiti                                               | HAITI (27)       |          |             |             |
| Malawi                                              | iLiNS-DYADM (30) | KDI      | 214         | 436         |
| Malawi                                              | iLiNS-DOSE (31)  | KDI      | 646         | 221         |
| <b>I<sup>2</sup> = 0.62, Tau<sup>2</sup> = 0.01</b> |                  |          | <b>3705</b> | <b>3258</b> |

Source water quality – Unimproved

|                                                     |                   |      |             |             |
|-----------------------------------------------------|-------------------|------|-------------|-------------|
| Burkina Faso                                        | iLiNS-Zinc (24)   | DMC  |             |             |
| Kenya                                               | WASH-B (28)       | EASQ | 649         | 2073        |
| Madagascar                                          | MAHAY (29)        | ASQI | 1613        | 1604        |
| Mali                                                | PROMIS CS (32)    | DMC  | 940         | 957         |
| Zimbabwe                                            | SHINE (HIV-) (33) | MDAT | 395         | 382         |
| Zimbabwe                                            | SHINE (HIV+) (34) | MDAT | 67          | 68          |
| <b>I<sup>2</sup> = 0.00, Tau<sup>2</sup> = 0.00</b> |                   |      | <b>3664</b> | <b>5084</b> |

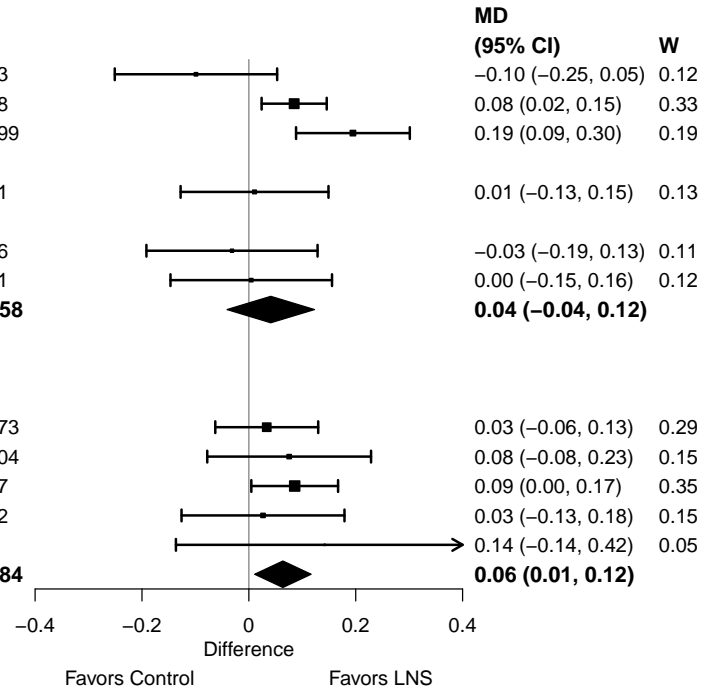

Supplemental figure 4J: Mean difference in gross motor z-score

4J6: Stratified by Sanitation

**Sanitation**  
(p-diff = 0.276)

**Sanitation – Improved**

| Country                                             | Trial            | Tool     | N           | N           |
|-----------------------------------------------------|------------------|----------|-------------|-------------|
| Bangladesh                                          | JiViA-4 (21)     | BSID-III | 445         | 143         |
| Bangladesh                                          | RDNS (22)        | DMC      | 1570        | 758         |
| Bangladesh                                          | WASH-B (23)      | EASQ     | 528         | 1099        |
| Ghana                                               | GHANA (25)       |          |             |             |
| Ghana                                               | iLiNS-DYADG (26) | KDI      | 302         | 601         |
| Haiti                                               | HAITI (27)       |          |             |             |
| Mali                                                | PROMIS CS (32)   | DMC      | 940         | 957         |
| <b>I<sup>2</sup> = 0.63, Tau<sup>2</sup> = 0.01</b> |                  |          | <b>3785</b> | <b>3558</b> |

**Sanitation – Unimproved**

|                                                     |                   |      |             |             |
|-----------------------------------------------------|-------------------|------|-------------|-------------|
| Burkina Faso                                        | iLiNS-Zinc (24)   | DMC  |             |             |
| Kenya                                               | WASH-B (28)       | EASQ | 649         | 2073        |
| Madagascar                                          | MAHAY (29)        | ASQI | 1613        | 1604        |
| Malawi                                              | iLiNS-DYADM (30)  | KDI  | 214         | 436         |
| Malawi                                              | iLiNS-DOSE (31)   | KDI  | 646         | 221         |
| Zimbabwe                                            | SHINE (HIV-) (33) | MDAT | 395         | 382         |
| Zimbabwe                                            | SHINE (HIV+) (34) | MDAT | 67          | 68          |
| <b>I<sup>2</sup> = 0.00, Tau<sup>2</sup> = 0.00</b> |                   |      | <b>3584</b> | <b>4784</b> |

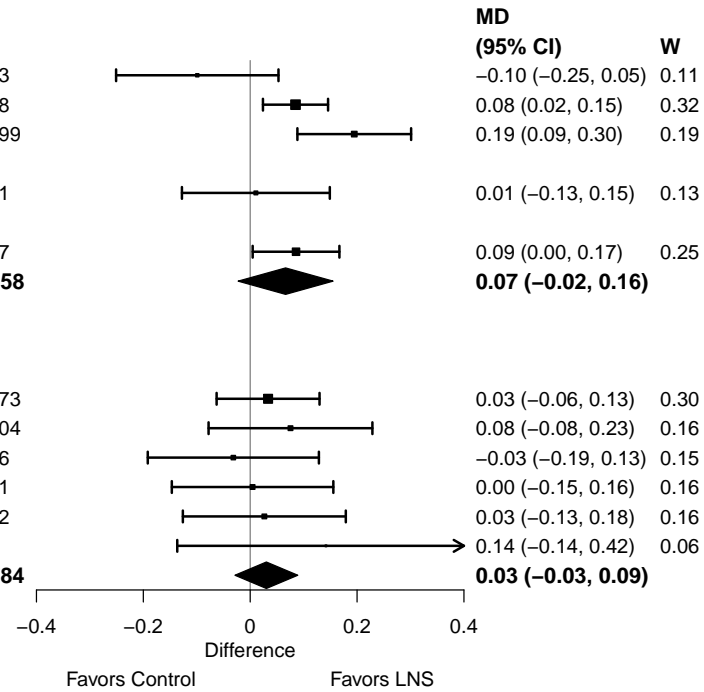

Supplemental figure 4J: Mean difference in gross motor z-score

4J7: Stratified by Supplement duration

**Supplement duration**  
(p-diff = 0.643)

**Supplement duration – 12m or less**

| Country      | Trial                                      | Tool     | N           | N           |
|--------------|--------------------------------------------|----------|-------------|-------------|
| Bangladesh   | JiVitA-4 (21)                              | BSID-III | 445         | 143         |
| Burkina Faso | iLiNS-Zinc (24)                            | DMC      |             |             |
| Ghana        | GHANA (25)                                 |          |             |             |
| Ghana        | iLiNS-DYADG (26)                           | KDI      | 302         | 601         |
| Haiti        | HAITI (27)                                 |          |             |             |
| Madagascar   | MAHAY (29)                                 | ASQI     | 1613        | 1604        |
| Malawi       | iLiNS-DYADM (30)                           | KDI      | 214         | 436         |
| Malawi       | iLiNS-DOSE (31)                            | KDI      | 646         | 221         |
| Zimbabwe     | SHINE <sup>1</sup> (HIV-) (33), LNS vs SOC | MDAT     | 395         | 382         |
| Zimbabwe     | LNS+WSH vs WSH                             | MDAT     | 446         | 417         |
| Zimbabwe     | SHINE <sup>1</sup> (HIV+) (34), LNS vs SOC | MDAT     | 67          | 68          |
| Zimbabwe     | LNS+WSH vs WSH                             | MDAT     | 103         | 83          |
|              |                                            |          | <b>4231</b> | <b>3955</b> |

**I<sup>2</sup> = 0.61, Tau<sup>2</sup> = 0.01**

**Supplement duration – > 12m**

|            |                |      |             |             |
|------------|----------------|------|-------------|-------------|
| Bangladesh | RDNS (22)      | DMC  | 1570        | 758         |
| Bangladesh | WASH-B (23)    | EASQ | 1074        | 3279        |
| Kenya      | WASH-B (28)    | EASQ | 1362        | 4745        |
| Mali       | PROMIS CS (32) | DMC  | 940         | 957         |
|            |                |      | <b>4946</b> | <b>9739</b> |

**I<sup>2</sup> = 0.37, Tau<sup>2</sup> = 0.00**

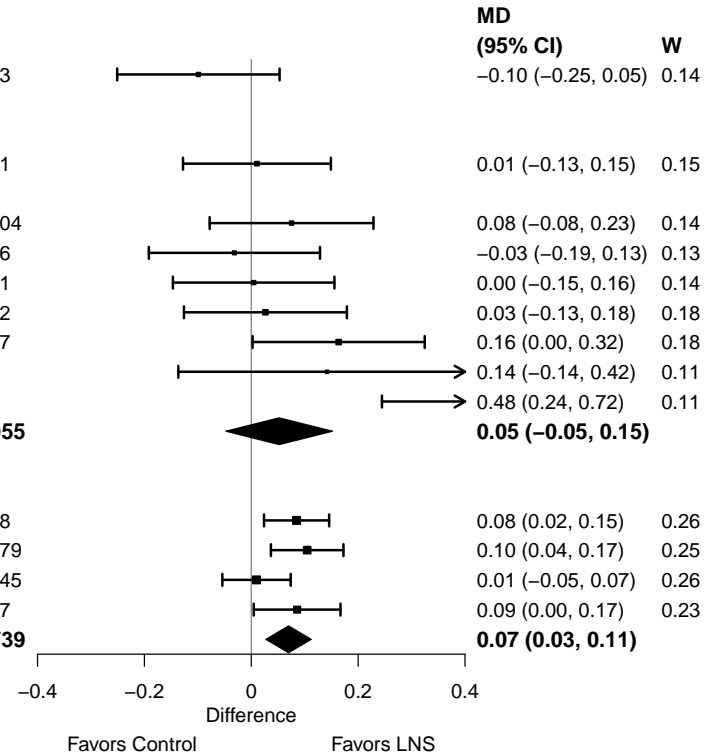

Supplemental figure 4J: Mean difference in gross motor z-score

4J8: Stratified by Frequency of contact

Frequency of contact  
( $p$ -diff = 0.150)

Frequency of contact – Monthly

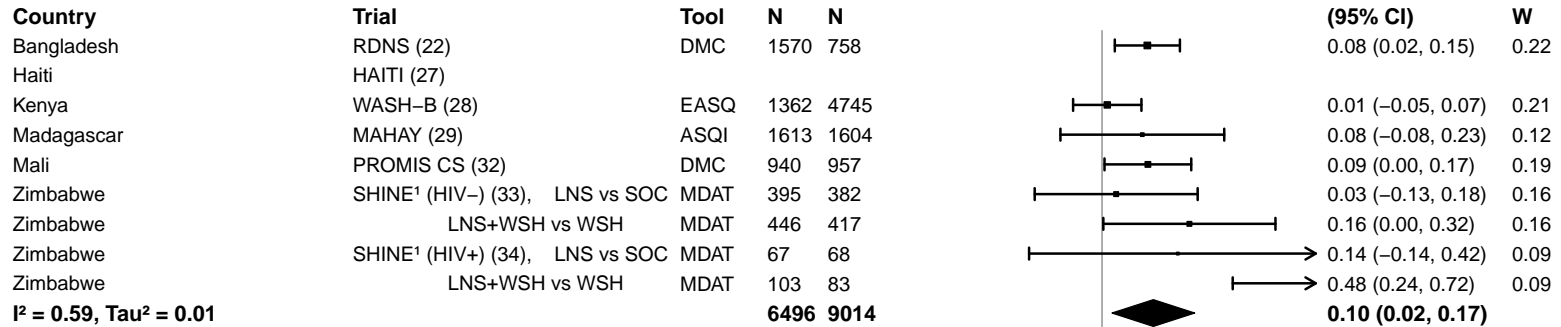

Frequency of contact – Weekly

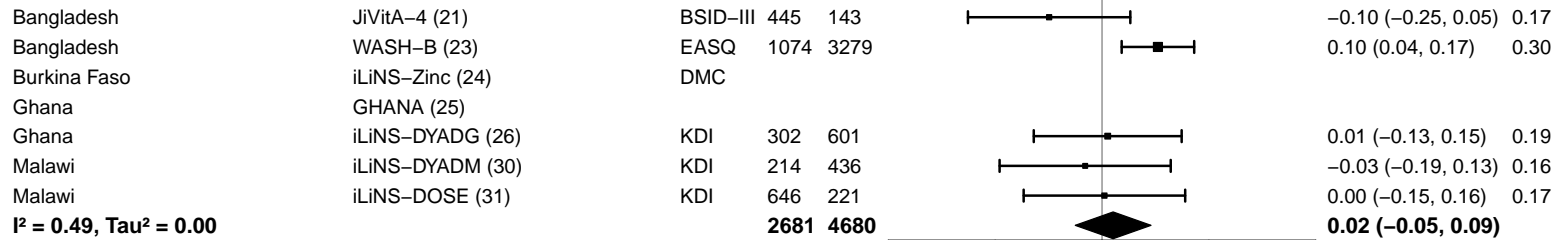

Supplemental figure 4J: Mean difference in gross motor z-score

4J9: Stratified by Average SQ-LNS compliance

**Average SQ-LNS compliance**  
(p-diff = 0.525)

**Average SQ-LNS compliance – Low**

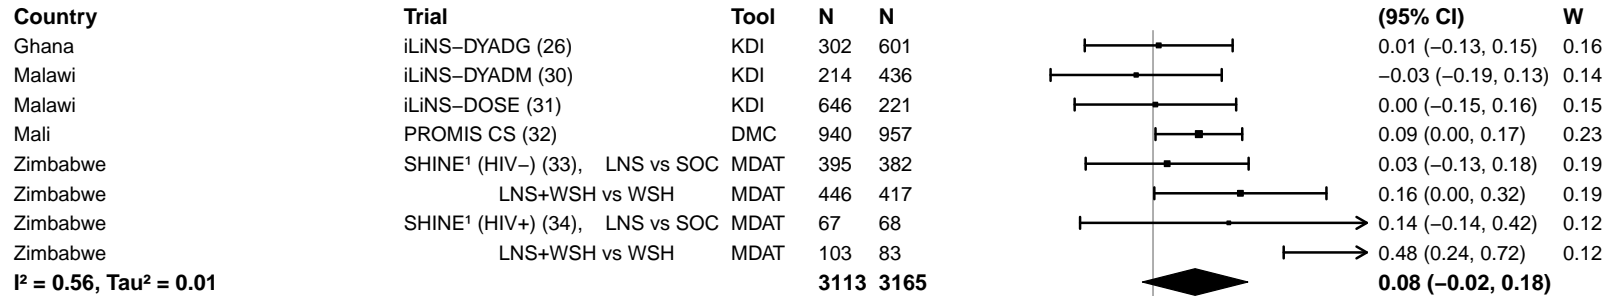

**Average SQ-LNS compliance – High**

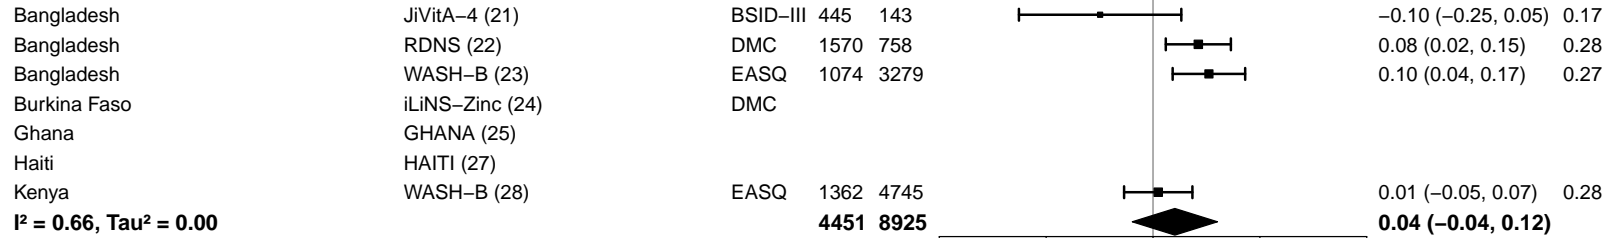

-0.4 -0.2 0 0.2 0.4  
Difference  
Favors Control Favors LNS

## Supplemental figure 4K: Mean difference in fine motor z-score

4K1: Stratified by Geographic region (insufficient comparisons)

**Supplemental figure 4K: Mean difference in fine motor z-score**

**4K2: Stratified by Stunting burden (insufficient comparisons)**



Supplemental figure 4K: Mean difference in fine motor z-score

4K3: Stratified by Malaria prevalence

**Malaria prevalence**  
(p-diff = 0.626)

**Malaria prevalence – Less than 10%**

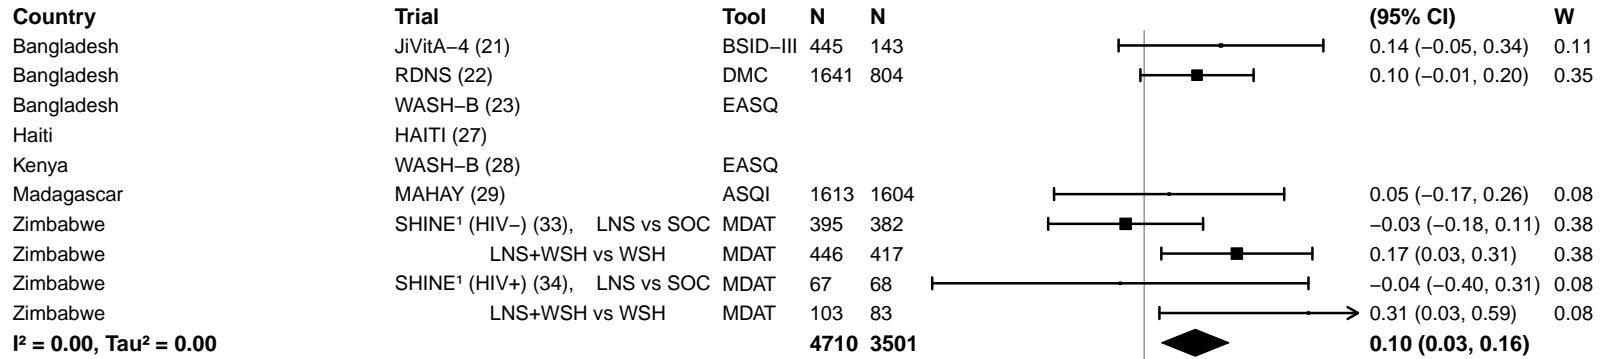

**Malaria prevalence – At least 10%**

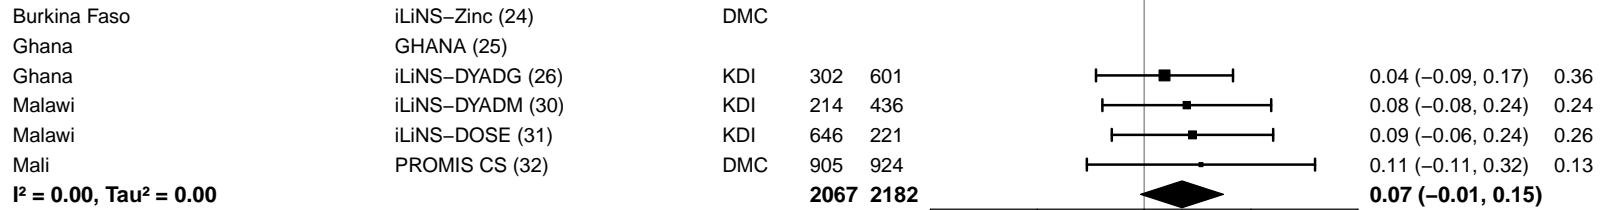

Supplemental figure 4K: Mean difference in fine motor z-score

4K4: Stratified by Anemia prevalence

Anemia prevalence  
(p-diff = 0.928)

Anemia prevalence – High

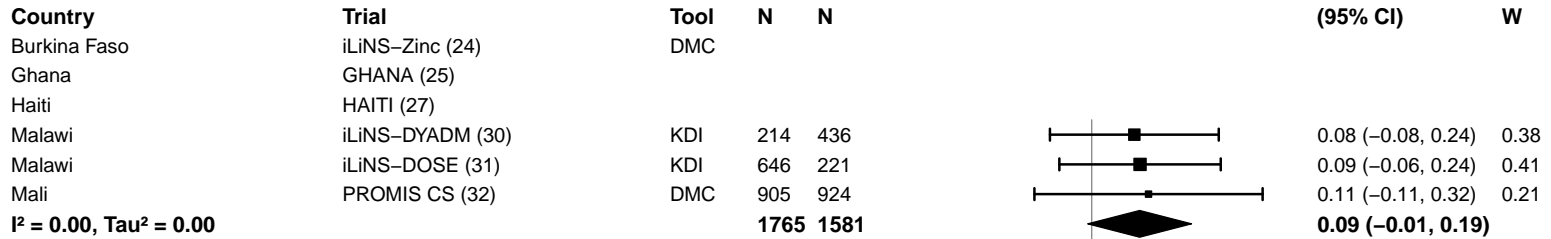

Anemia prevalence – Moderate

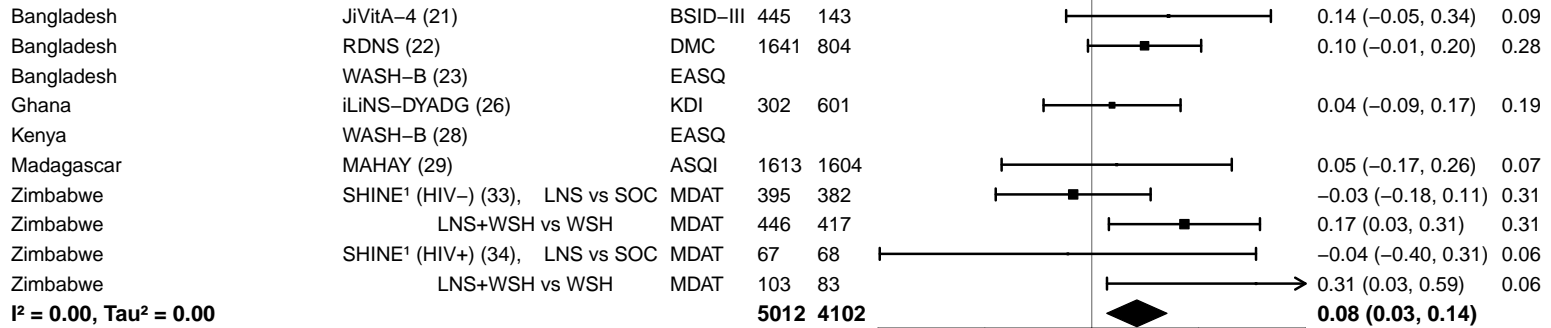

Supplemental figure 4K: Mean difference in fine motor z-score

4K5: Stratified by Source water quality

**Source water quality**  
(p-diff = 0.234)

**Source water quality – Improved**

| Country                                             | Trial            | Tool     | N           | N           | MD (95% CI)              | W    |
|-----------------------------------------------------|------------------|----------|-------------|-------------|--------------------------|------|
| Bangladesh                                          | JiVitA-4 (21)    | BSID-III | 445         | 143         | 0.14 (-0.05, 0.34)       | 0.10 |
| Bangladesh                                          | RDNS (22)        | DMC      | 1641        | 804         | 0.10 (-0.01, 0.20)       | 0.34 |
| Bangladesh                                          | WASH-B (23)      | EASQ     |             |             |                          |      |
| Ghana                                               | GHANA (25)       |          |             |             |                          |      |
| Ghana                                               | iLiNS-DYADG (26) | KDI      | 302         | 601         | 0.04 (-0.09, 0.17)       | 0.23 |
| Haiti                                               | HAITI (27)       |          |             |             |                          |      |
| Malawi                                              | iLiNS-DYADM (30) | KDI      | 214         | 436         | 0.08 (-0.08, 0.24)       | 0.15 |
| Malawi                                              | iLiNS-DOSE (31)  | KDI      | 646         | 221         | 0.09 (-0.06, 0.24)       | 0.17 |
| <b>I<sup>2</sup> = 0.00, Tau<sup>2</sup> = 0.00</b> |                  |          | <b>3248</b> | <b>2205</b> | <b>0.09 (0.02, 0.15)</b> |      |

**Source water quality – Unimproved**

|                                                     |                   |      |             |             |                           |      |
|-----------------------------------------------------|-------------------|------|-------------|-------------|---------------------------|------|
| Burkina Faso                                        | iLiNS-Zinc (24)   | DMC  |             |             |                           |      |
| Kenya                                               | WASH-B (28)       | EASQ |             |             |                           |      |
| Madagascar                                          | MAHAY (29)        | ASQI | 1613        | 1604        | 0.05 (-0.17, 0.26)        | 0.22 |
| Mali                                                | PROMIS CS (32)    | DMC  | 905         | 924         | 0.11 (-0.11, 0.32)        | 0.22 |
| Zimbabwe                                            | SHINE (HIV-) (33) | MDAT | 395         | 382         | -0.03 (-0.18, 0.11)       | 0.48 |
| Zimbabwe                                            | SHINE (HIV+) (34) | MDAT | 67          | 68          | -0.04 (-0.40, 0.31)       | 0.08 |
| <b>I<sup>2</sup> = 0.00, Tau<sup>2</sup> = 0.00</b> |                   |      | <b>2980</b> | <b>2978</b> | <b>0.01 (-0.09, 0.11)</b> |      |

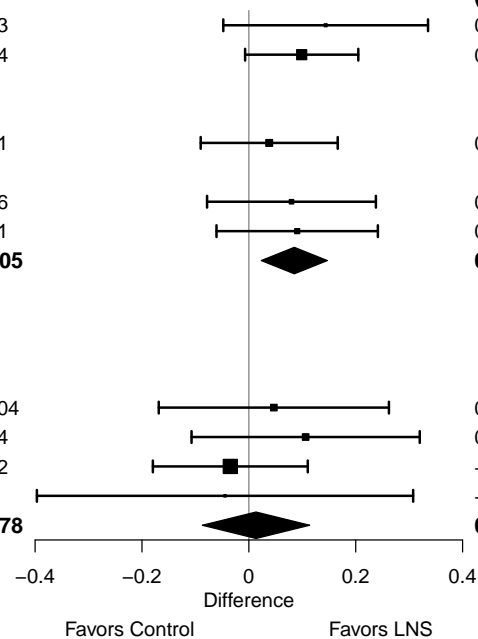

Supplemental figure 4K: Mean difference in fine motor z-score

4K6: Stratified by Sanitation

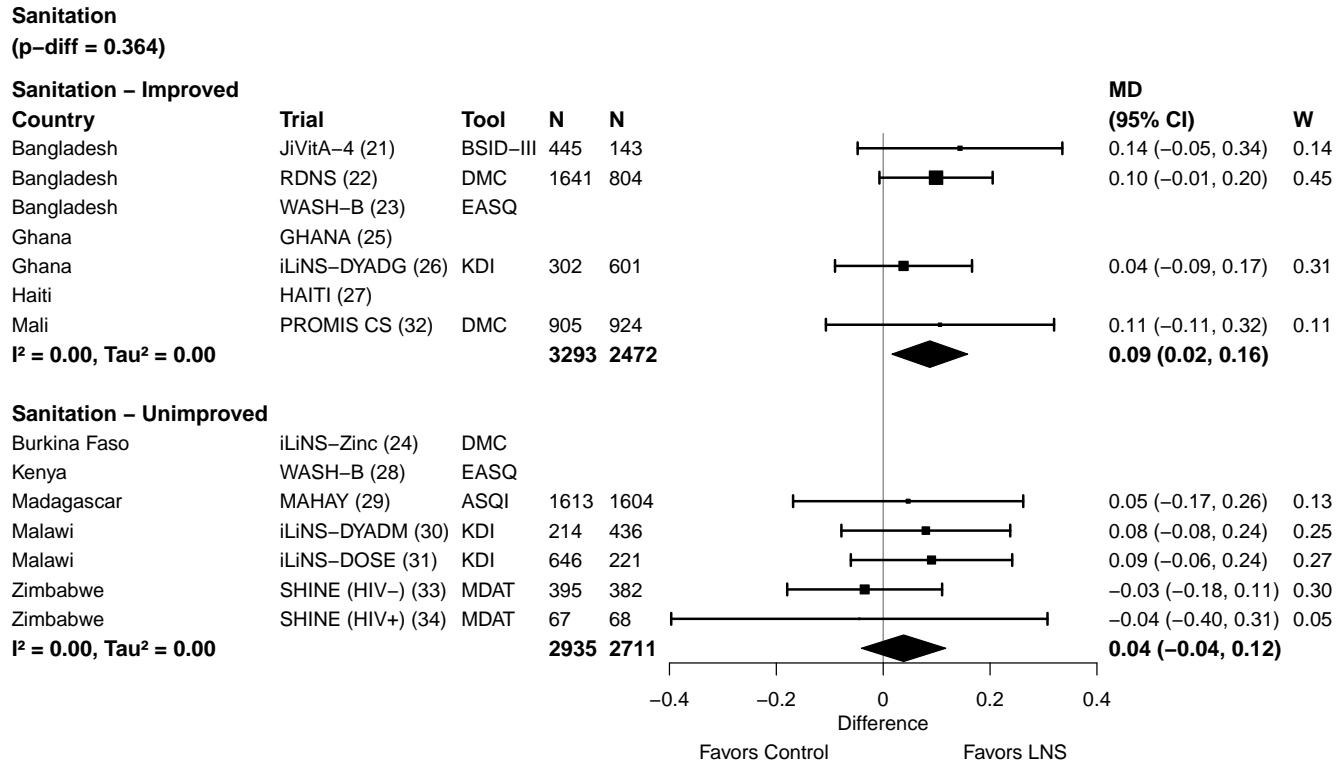

**Supplemental figure 4K: Mean difference in fine motor z-score**

**4K7: Stratified by Supplement duration (insufficient comparisons)**

Supplemental figure 4K: Mean difference in fine motor z-score

4K8: Stratified by Frequency of contact

**Frequency of contact**  
( $p\text{-diff} = 0.791$ )

**Frequency of contact – Monthly**

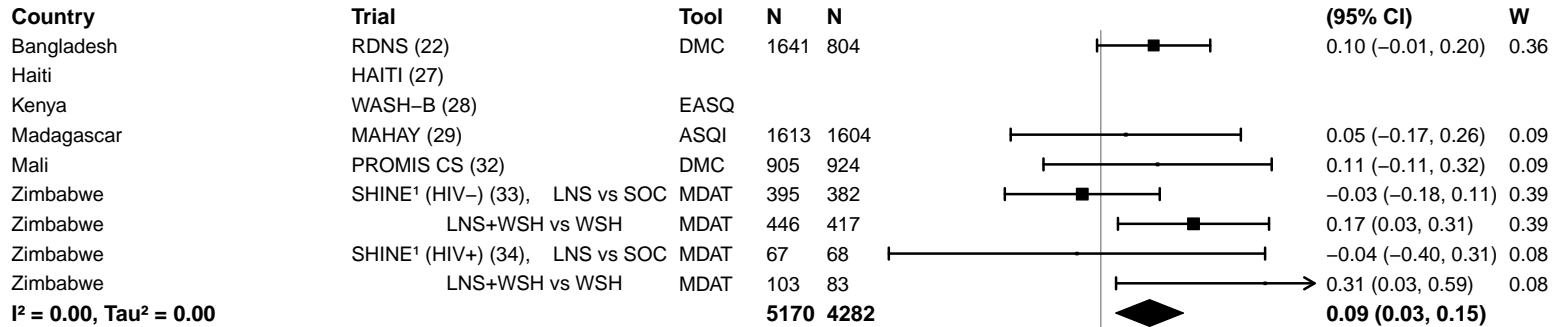

**Frequency of contact – Weekly**

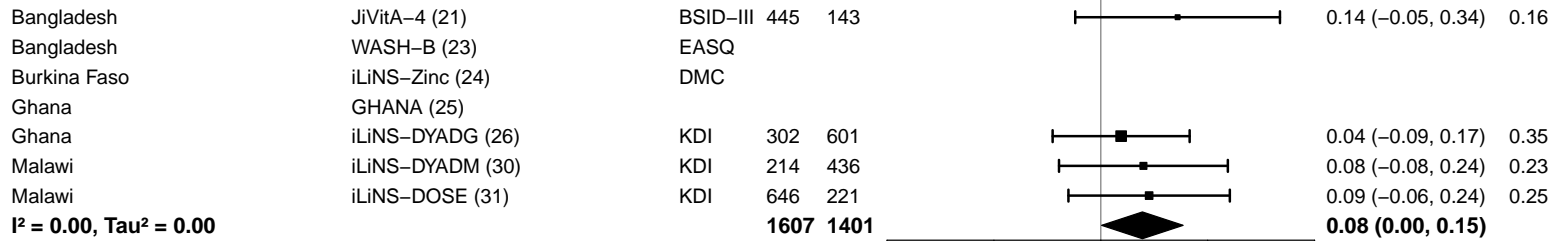

**Supplemental figure 4K: Mean difference in fine motor z-score**

**4K9: Stratified by Average SQ-LNS compliance (insufficient comparisons)**

## Supplemental figure 4L: Mean difference in executive function z-score

4L1: Stratified by Geographic region (insufficient comparisons)



**Supplemental figure 4L: Mean difference in executive function z-score**

**4L2: Stratified by Stunting burden (insufficient comparisons)**

Supplemental figure 4L: Mean difference in executive function z-score

4L3: Stratified by Malaria prevalence

**Malaria prevalence**  
(p-diff = 0.242)

**Malaria prevalence – Less than 10%**

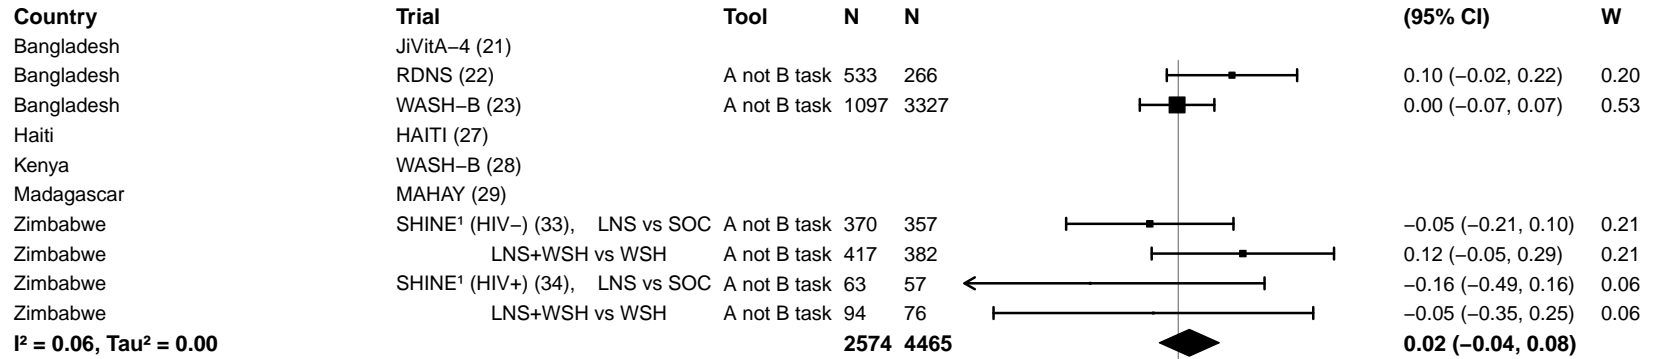

**Malaria prevalence – At least 10%**

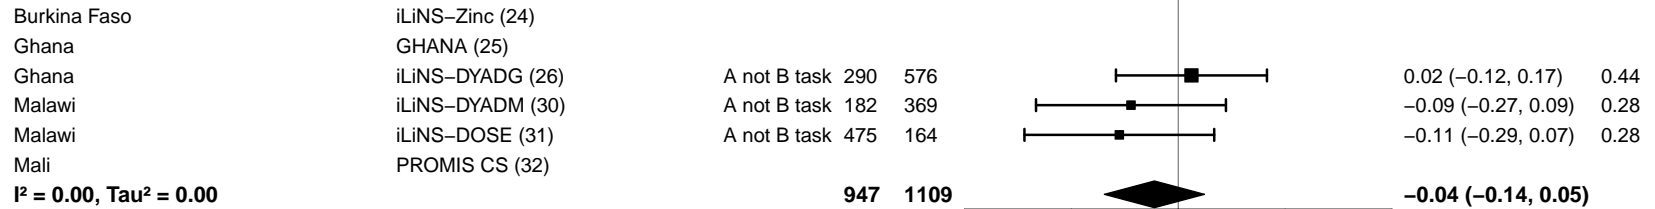

**Supplemental figure 4L: Mean difference in executive function z-score**

**4L4: Stratified by Anemia prevalence (insufficient comparisons)**

**Supplemental figure 4L: Mean difference in executive function z-score**

**4L5: Stratified by Source water quality (insufficient comparisons)**

Supplemental figure 4L: Mean difference in executive function z-score

4L6: Stratified by Sanitation

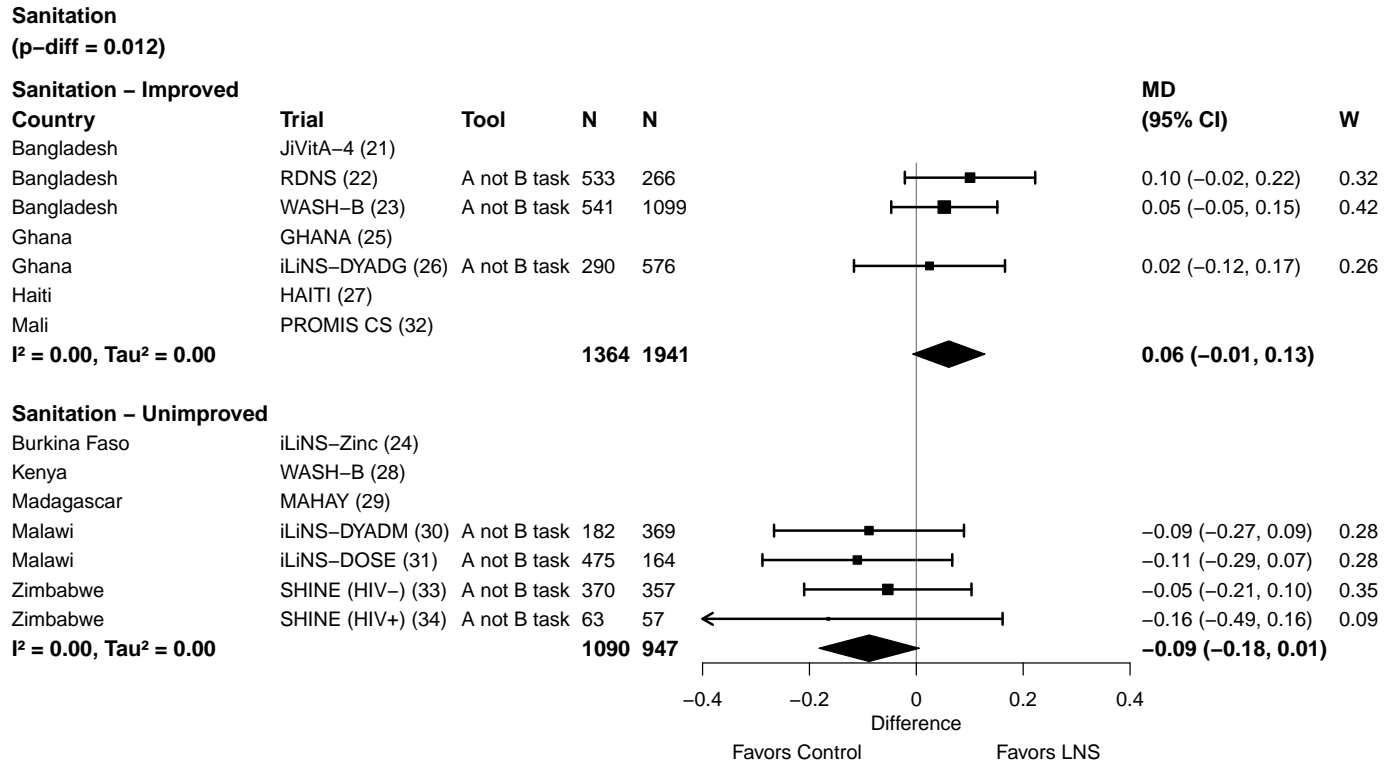

**Supplemental figure 4L: Mean difference in executive function z-score**

**4L7: Stratified by Supplement duration (insufficient comparisons)**

Supplemental figure 4L: Mean difference in executive function z-score

4L8: Stratified by Frequency of contact

**Frequency of contact**  
(p-diff = 0.192)

**Frequency of contact – Monthly**

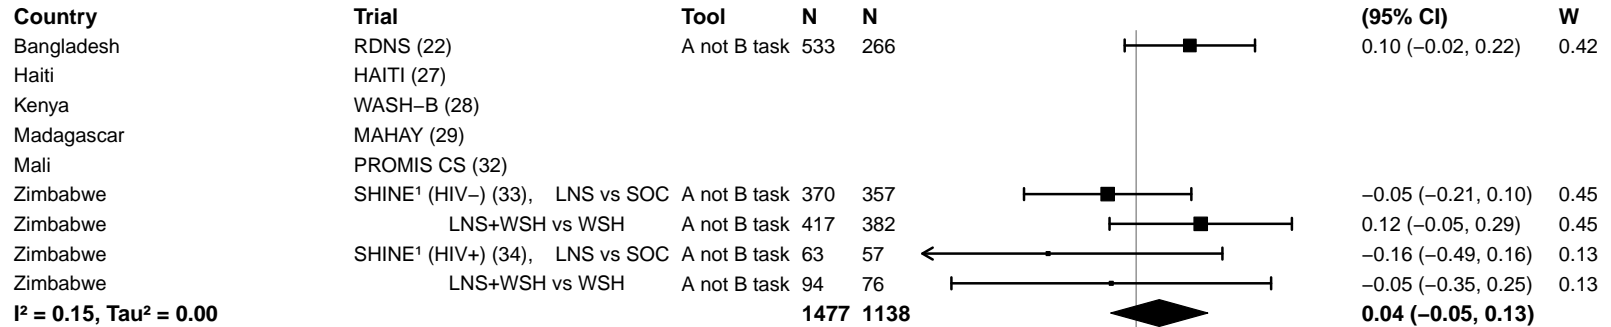

**Frequency of contact – Weekly**

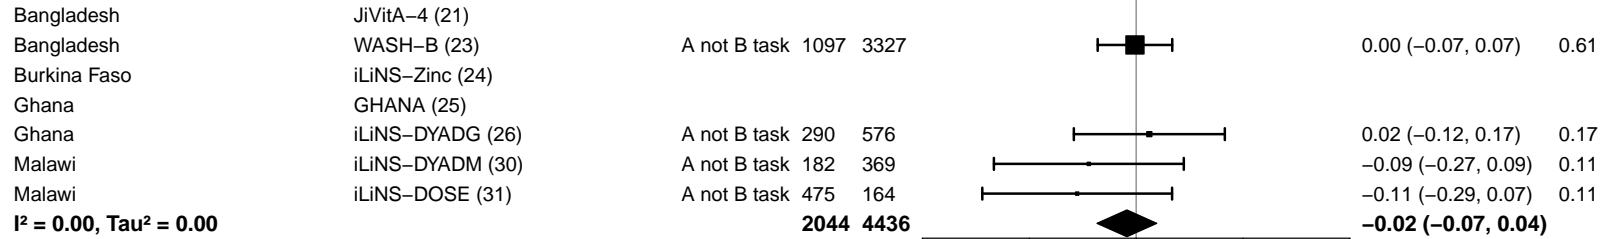

**Supplemental figure 4L: Mean difference in executive function z-score**

**4L9: Stratified by Average SQ-LNS compliance (insufficient comparisons)**



## Supplemental figure 4M: Executive function lowest decile prevalence ratio

4M1: Stratified by Geographic region (insufficient comparisons)

**Supplemental figure 4M: Executive function lowest decile prevalence ratio**

**4M2: Stratified by Stunting burden (insufficient comparisons)**

Supplemental figure 4M: Executive function lowest decile prevalence ratio

4M3: Stratified by Malaria prevalence

**Malaria prevalence**  
( $p$ -diff = 0.990)

**Malaria prevalence – Less than 10%**

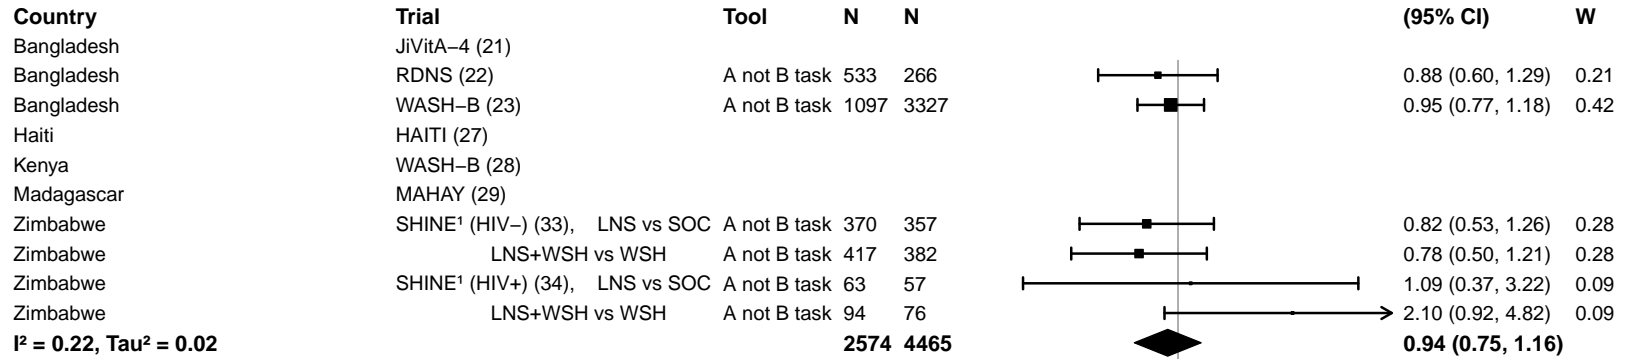

**Malaria prevalence – At least 10%**

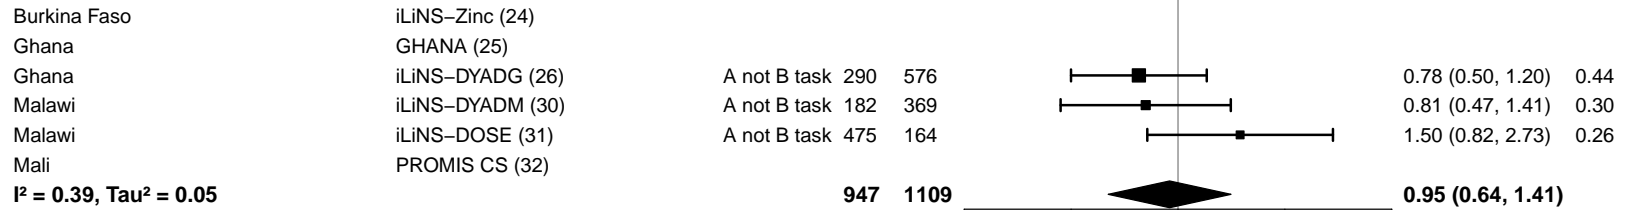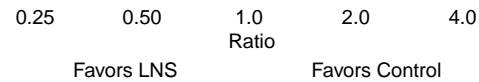

**Supplemental figure 4M: Executive function lowest decile prevalence ratio**

**4M4: Stratified by Anemia prevalence (insufficient comparisons)**

**Supplemental figure 4M: Executive function lowest decile prevalence ratio**

**4M5: Stratified by Source water quality (insufficient comparisons)**

Supplemental figure 4M: Executive function lowest decile prevalence ratio

4M6: Stratified by Sanitation

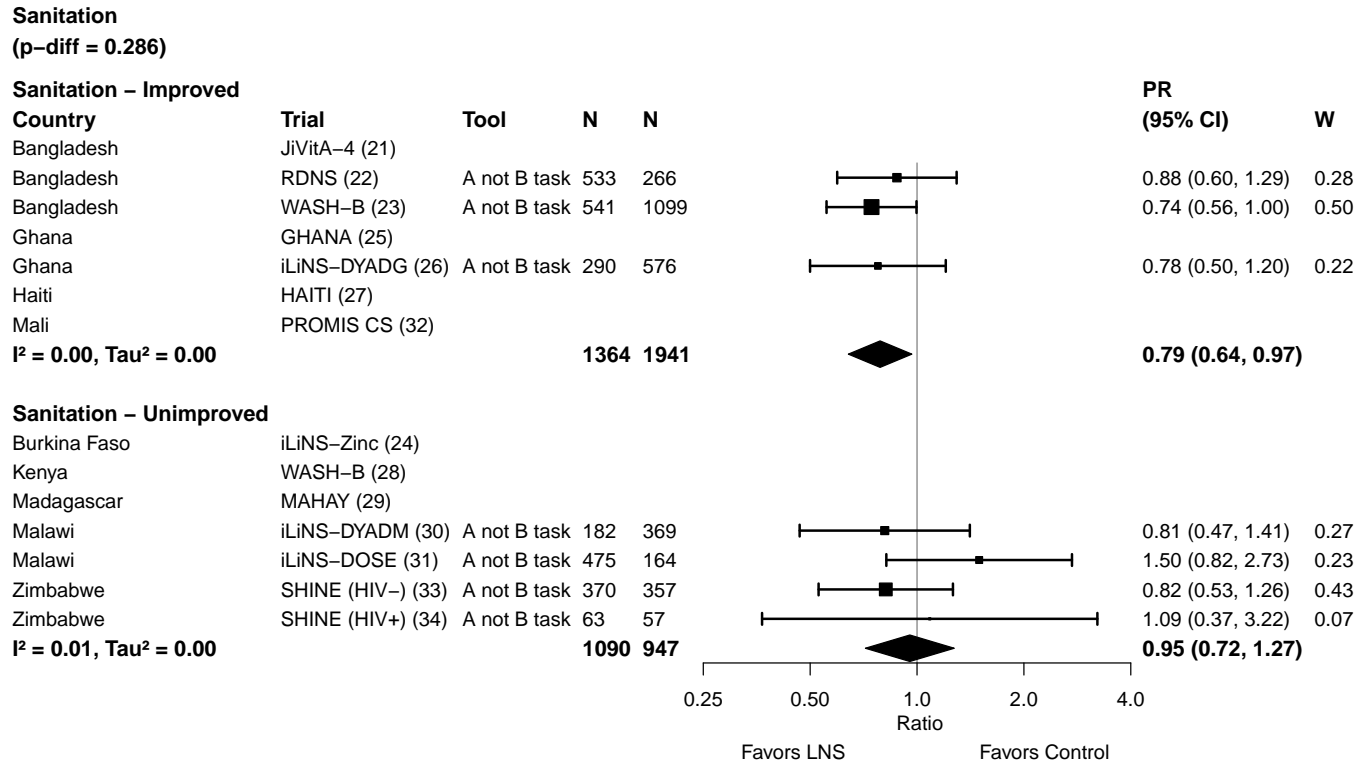

**Supplemental figure 4M: Executive function lowest decile prevalence ratio**

**4M7: Stratified by Supplement duration (insufficient comparisons)**

Supplemental figure 4M: Executive function lowest decile prevalence ratio

4M8: Stratified by Frequency of contact

Frequency of contact  
(p-diff = 0.724)

Frequency of contact – Monthly

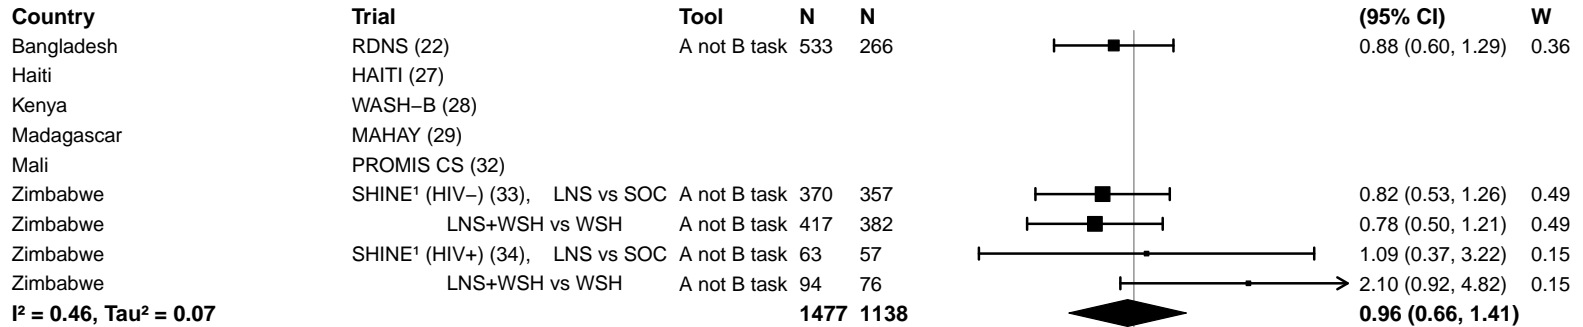

Frequency of contact – Weekly

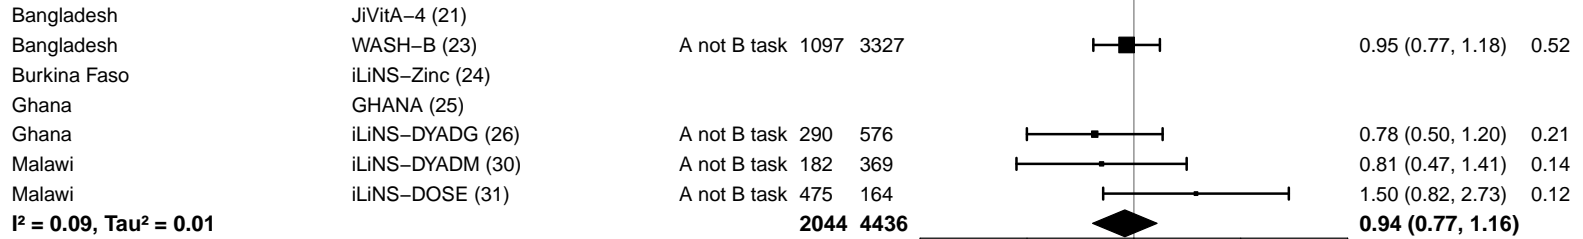

0.25 0.50 1.0 2.0 4.0  
Ratio  
Favors LNS Favors Control



**Supplemental figure 4M: Executive function lowest decile prevalence ratio**

**4M9: Stratified by Average SQ-LNS compliance (insufficient comparisons)**

**Supplemental figure 4N: Executive function lowest decile prevalence difference**  
**4N1: Stratified by Geographic region (insufficient comparisons)**

**Supplemental figure 4N: Executive function lowest decile prevalence difference**

**4N2: Stratified by Stunting burden (insufficient comparisons)**

Supplemental figure 4N: Executive function lowest decile prevalence difference

4N3: Stratified by Malaria prevalence

**Malaria prevalence**  
(p-diff = 0.865)

**Malaria prevalence – Less than 10%**

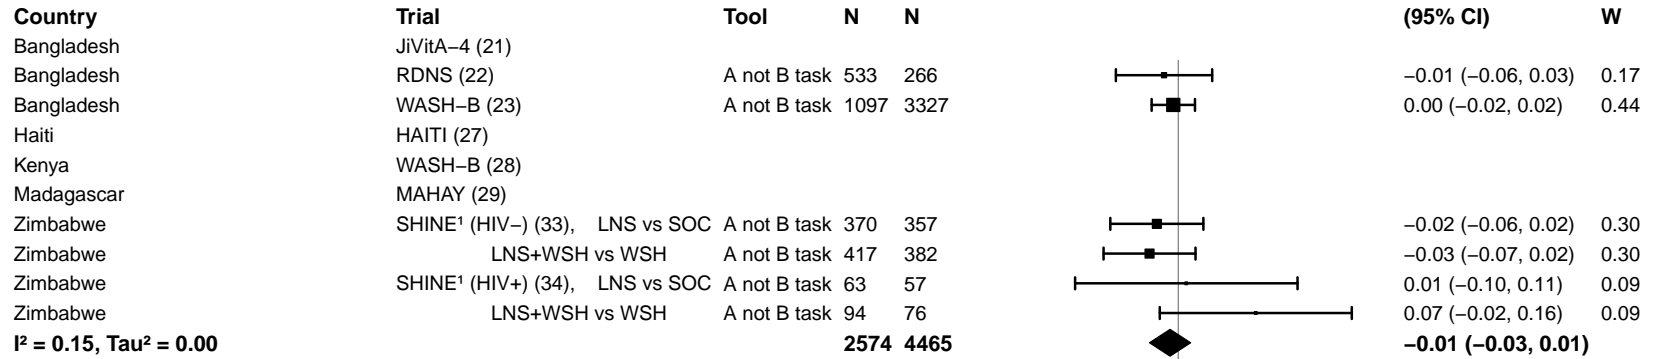

**Malaria prevalence – At least 10%**

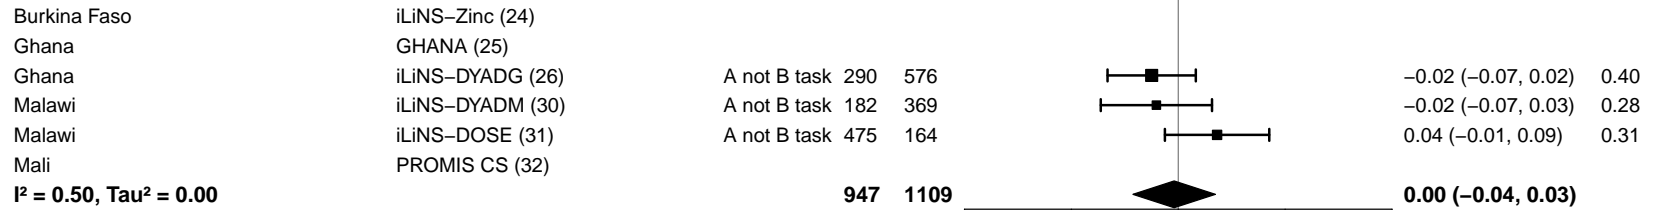

**Supplemental figure 4N: Executive function lowest decile prevalence difference**

**4N4: Stratified by Anemia prevalence (insufficient comparisons)**

**Supplemental figure 4N: Executive function lowest decile prevalence difference**

**4N5: Stratified by Source water quality (insufficient comparisons)**

Supplemental figure 4N: Executive function lowest decile prevalence difference

4N6: Stratified by Sanitation

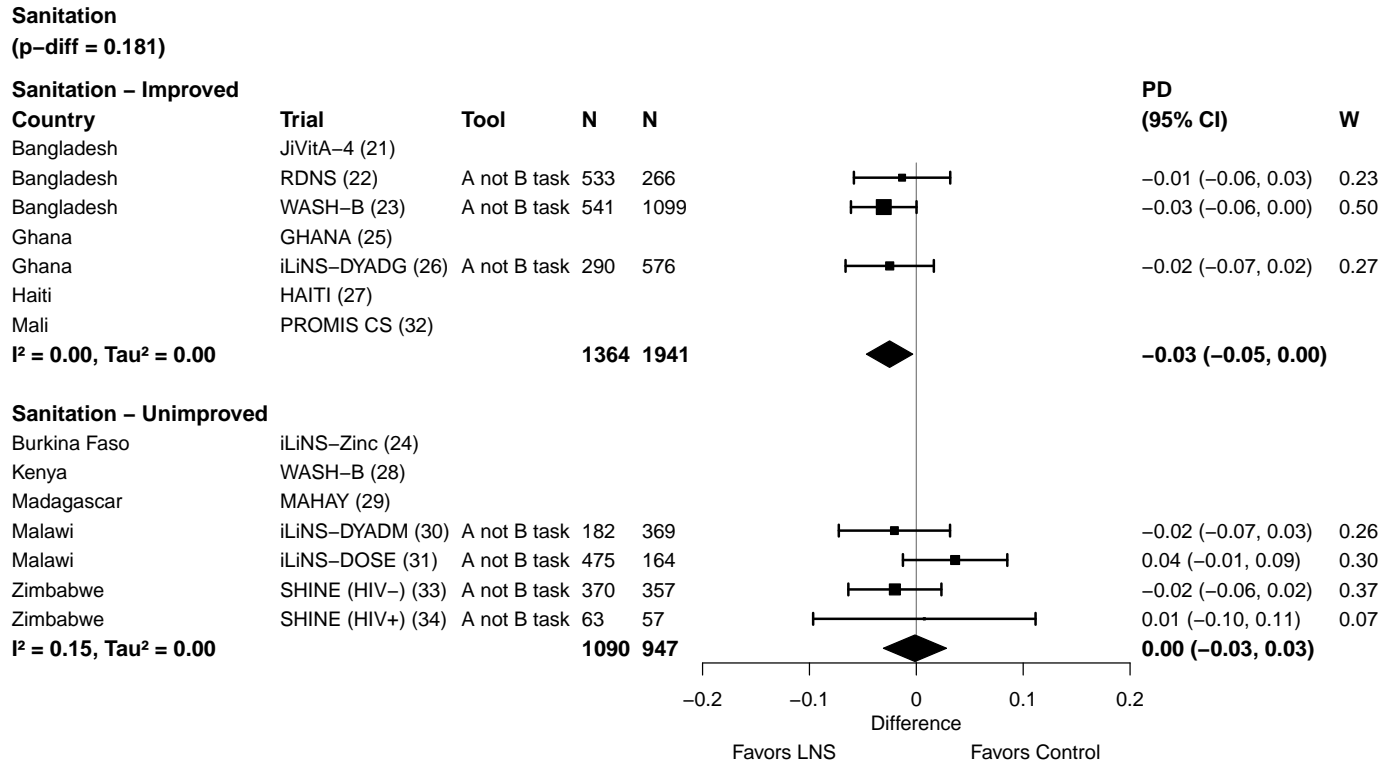

**Supplemental figure 4N: Executive function lowest decile prevalence difference**

**4N7: Stratified by Supplement duration (insufficient comparisons)**



Supplemental figure 4N: Executive function lowest decile prevalence difference

4N8: Stratified by Frequency of contact

**Frequency of contact**  
(p-diff = 0.609)

**Frequency of contact – Monthly**

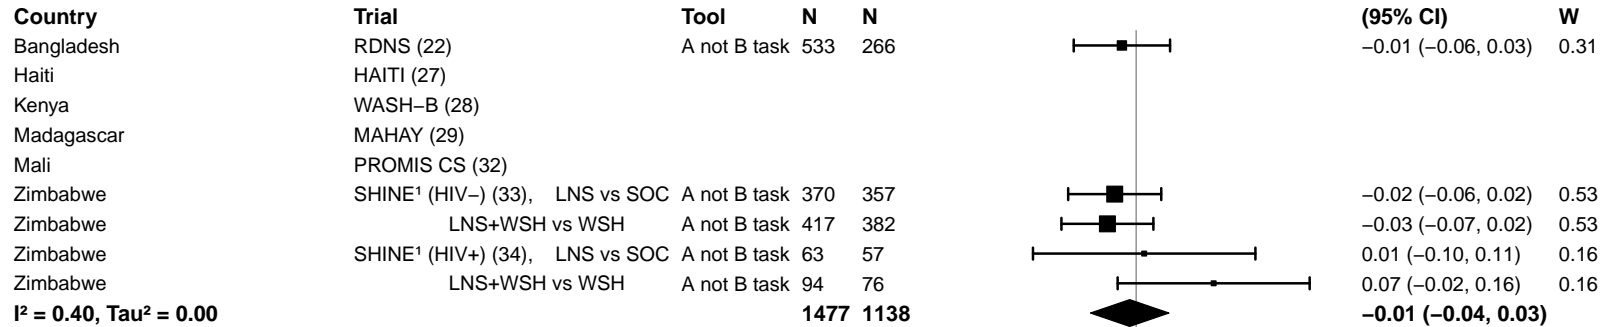

**Frequency of contact – Weekly**

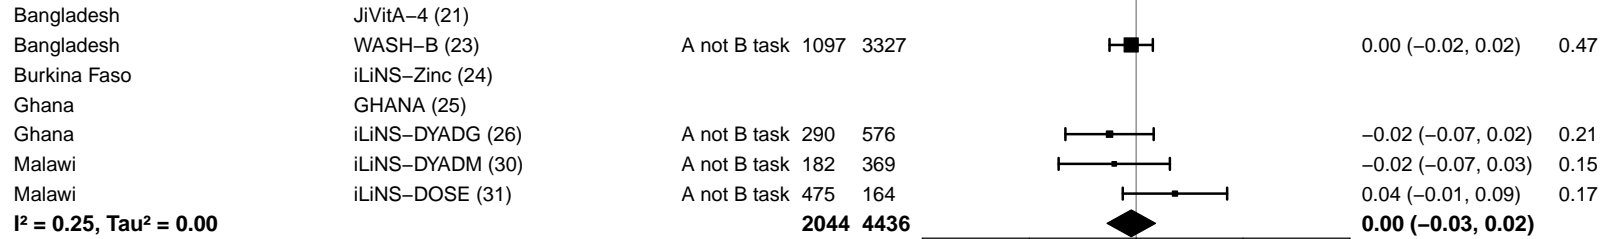

-0.2    -0.1    0    0.1    0.2  
Difference  
Favors LNS                      Favors Control

**Supplemental figure 4N: Executive function lowest decile prevalence difference**

**4N9: Stratified by Average SQ-LNS compliance (insufficient comparisons)**

## Supplemental figure 4O: 12-mo walking without support prevalence ratio

### 4O1: Stratified by Geographic region

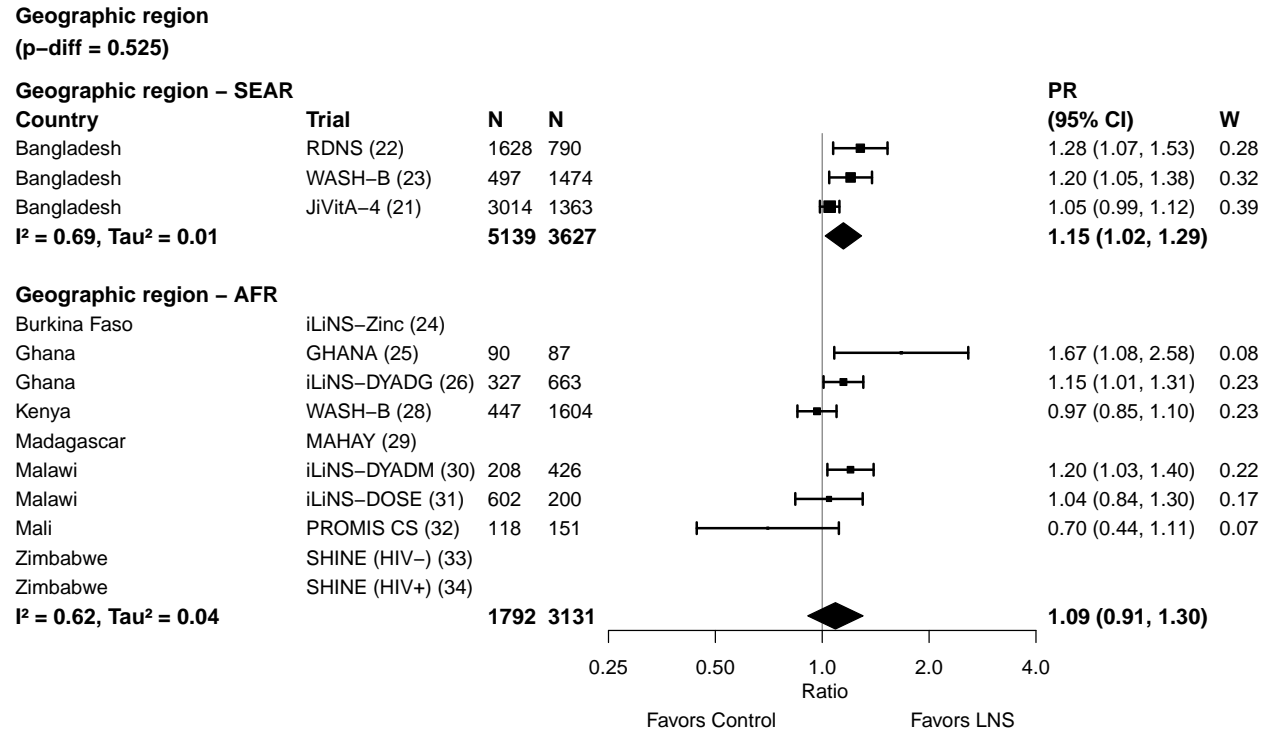

Supplemental figure 4O: 12-mo walking without support prevalence ratio

4O2: Stratified by Stunting burden

**Stunting burden**

( $p$ -diff = 0.711)

**Stunting burden – Less than 35%**

| Country                                             | Trial            | N           | N           | PR (95% CI)              | W    |
|-----------------------------------------------------|------------------|-------------|-------------|--------------------------|------|
| Ghana                                               | GHANA (25)       | 90          | 87          | 1.67 (1.08, 2.58)        | 0.08 |
| Ghana                                               | iLiNS-DYADG (26) | 327         | 663         | 1.15 (1.01, 1.31)        | 0.28 |
| Haiti                                               | HAITI (27)       | 83          | 79          | 1.25 (0.86, 1.81)        | 0.10 |
| Kenya                                               | WASH-B (28)      | 447         | 1604        | 0.97 (0.85, 1.10)        | 0.28 |
| Malawi                                              | iLiNS-DYADM (30) | 208         | 426         | 1.20 (1.03, 1.40)        | 0.26 |
| <b><math>I^2 = 0.59, \text{Tau}^2 = 0.01</math></b> |                  | <b>1155</b> | <b>2859</b> | <b>1.15 (1.00, 1.33)</b> |      |

**Stunting burden – More than 35%**

|                                                     |                   |             |             |                          |      |
|-----------------------------------------------------|-------------------|-------------|-------------|--------------------------|------|
| Bangladesh                                          | RDNS (22)         | 1628        | 790         | 1.28 (1.07, 1.53)        | 0.21 |
| Bangladesh                                          | WASH-B (23)       | 497         | 1474        | 1.20 (1.05, 1.38)        | 0.24 |
| Burkina Faso                                        | iLiNS-Zinc (24)   |             |             |                          |      |
| Madagascar                                          | MAHAY (29)        |             |             |                          |      |
| Malawi                                              | iLiNS-DOSE (31)   | 602         | 200         | 1.04 (0.84, 1.30)        | 0.17 |
| Mali                                                | PROMIS CS (32)    | 118         | 151         | 0.70 (0.44, 1.11)        | 0.07 |
| Zimbabwe                                            | SHINE (HIV-) (33) |             |             |                          |      |
| Zimbabwe                                            | SHINE (HIV+) (34) |             |             |                          |      |
| Bangladesh                                          | JiVitA-4 (21)     | 3014        | 1363        | 1.05 (0.99, 1.12)        | 0.31 |
| <b><math>I^2 = 0.60, \text{Tau}^2 = 0.02</math></b> |                   | <b>5859</b> | <b>3978</b> | <b>1.09 (0.94, 1.27)</b> |      |

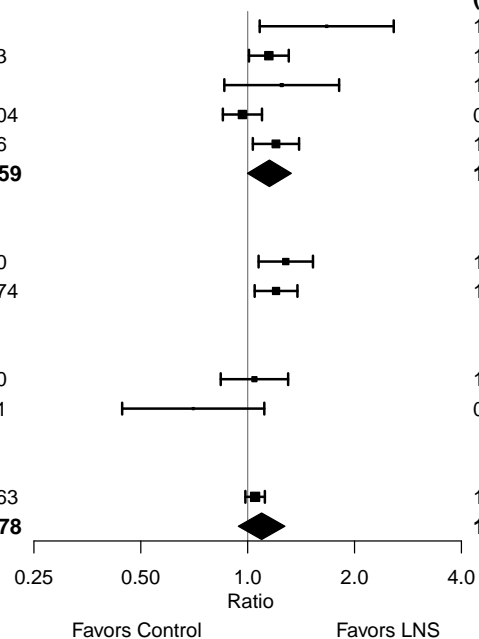

Supplemental figure 4O: 12-mo walking without support prevalence ratio

4O3: Stratified by Malaria prevalence

**Malaria prevalence**

(p-diff = 0.768)

**Malaria prevalence – Less than 10%**

| Country                                             | Trial             | N           | N           | PR<br>(95% CI)           | W    |
|-----------------------------------------------------|-------------------|-------------|-------------|--------------------------|------|
| Bangladesh                                          | RDNS (22)         | 1628        | 790         | 1.28 (1.07, 1.53)        | 0.19 |
| Bangladesh                                          | WASH-B (23)       | 497         | 1474        | 1.20 (1.05, 1.38)        | 0.22 |
| Haiti                                               | HAITI (27)        | 83          | 79          | 1.25 (0.86, 1.81)        | 0.08 |
| Kenya                                               | WASH-B (28)       | 447         | 1604        | 0.97 (0.85, 1.10)        | 0.23 |
| Madagascar                                          | MAHAY (29)        |             |             |                          |      |
| Zimbabwe                                            | SHINE (HIV-) (33) |             |             |                          |      |
| Zimbabwe                                            | SHINE (HIV+) (34) |             |             |                          |      |
| Bangladesh                                          | JiVitA-4 (21)     | 3014        | 1363        | 1.05 (0.99, 1.12)        | 0.28 |
| <b>I<sup>2</sup> = 0.61, Tau<sup>2</sup> = 0.01</b> |                   | <b>5669</b> | <b>5310</b> | <b>1.11 (1.00, 1.23)</b> |      |

**Malaria prevalence – At least 10%**

|                                                     |                  |             |             |                          |      |
|-----------------------------------------------------|------------------|-------------|-------------|--------------------------|------|
| Burkina Faso                                        | iLiNS-Zinc (24)  |             |             |                          |      |
| Ghana                                               | GHANA (25)       | 90          | 87          | 1.67 (1.08, 2.58)        | 0.09 |
| Ghana                                               | iLiNS-DYADG (26) | 327         | 663         | 1.15 (1.01, 1.31)        | 0.32 |
| Malawi                                              | iLiNS-DYADM (30) | 208         | 426         | 1.20 (1.03, 1.40)        | 0.29 |
| Malawi                                              | iLiNS-DOSE (31)  | 602         | 200         | 1.04 (0.84, 1.30)        | 0.22 |
| Mali                                                | PROMIS CS (32)   | 118         | 151         | 0.70 (0.44, 1.11)        | 0.08 |
| <b>I<sup>2</sup> = 0.52, Tau<sup>2</sup> = 0.05</b> |                  | <b>1345</b> | <b>1527</b> | <b>1.12 (0.90, 1.41)</b> |      |

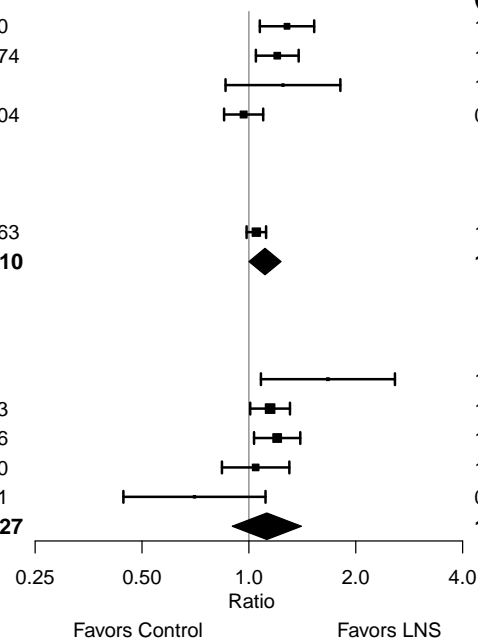

Supplemental figure 4O: 12-mo walking without support prevalence ratio

4O4: Stratified by Anemia prevalence

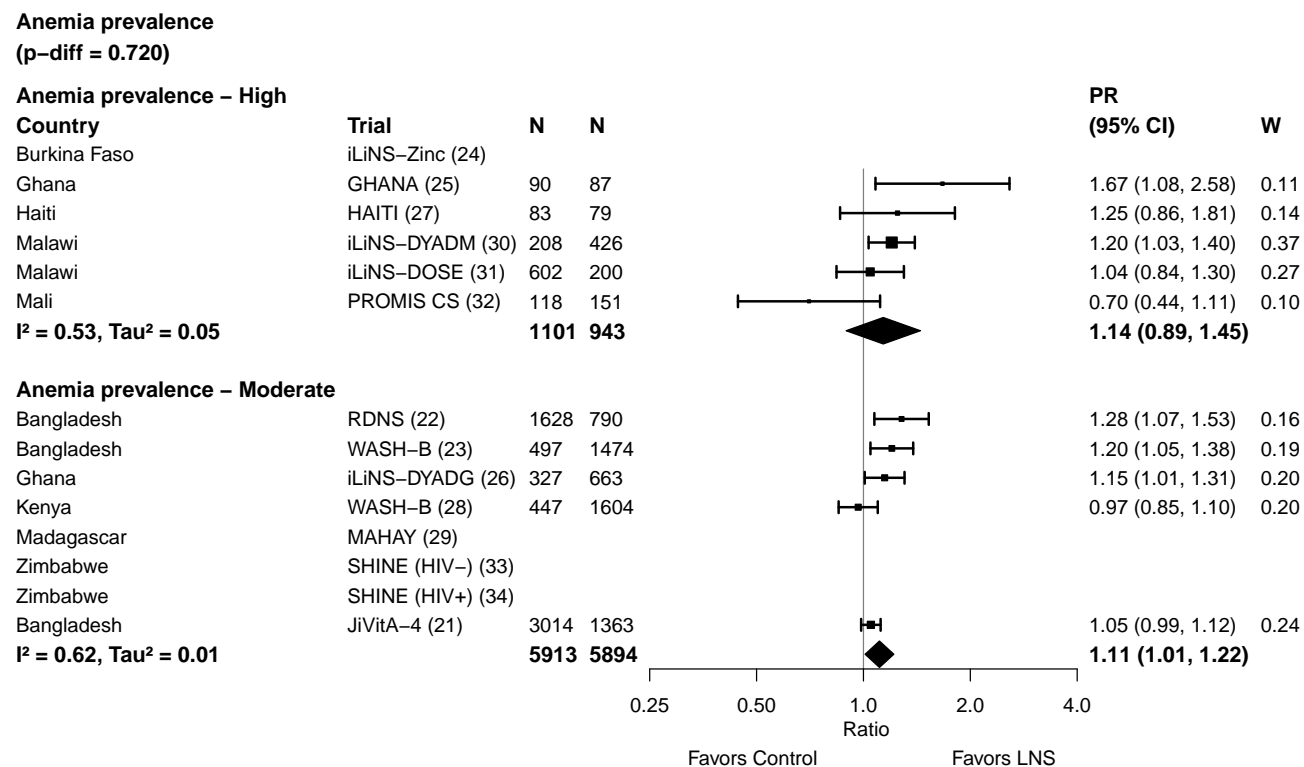

**Supplemental figure 4O: 12-mo walking without support prevalence ratio**

**4O5: Stratified by Source water quality (insufficient comparisons)**

Supplemental figure 4O: 12-mo walking without support prevalence ratio

4O6: Stratified by Sanitation

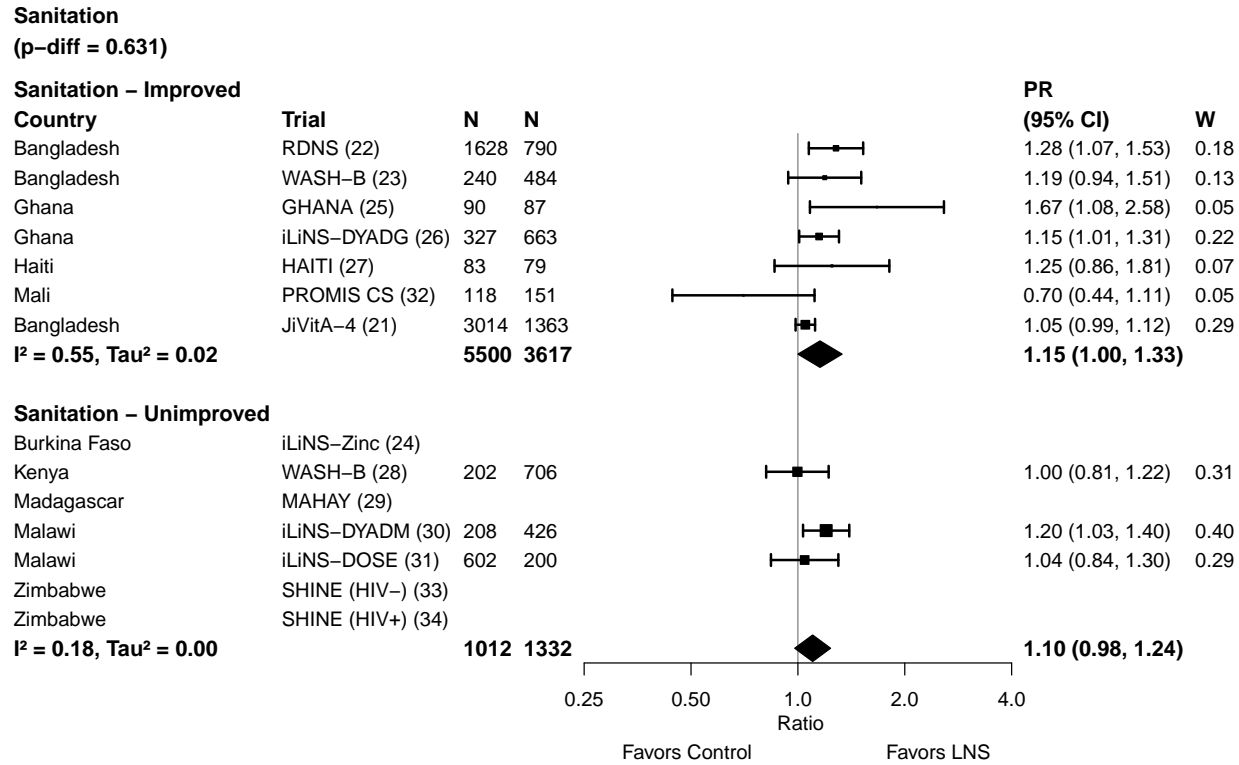



Supplemental figure 4O: 12-mo walking without support prevalence ratio

4O7: Stratified by Supplement duration

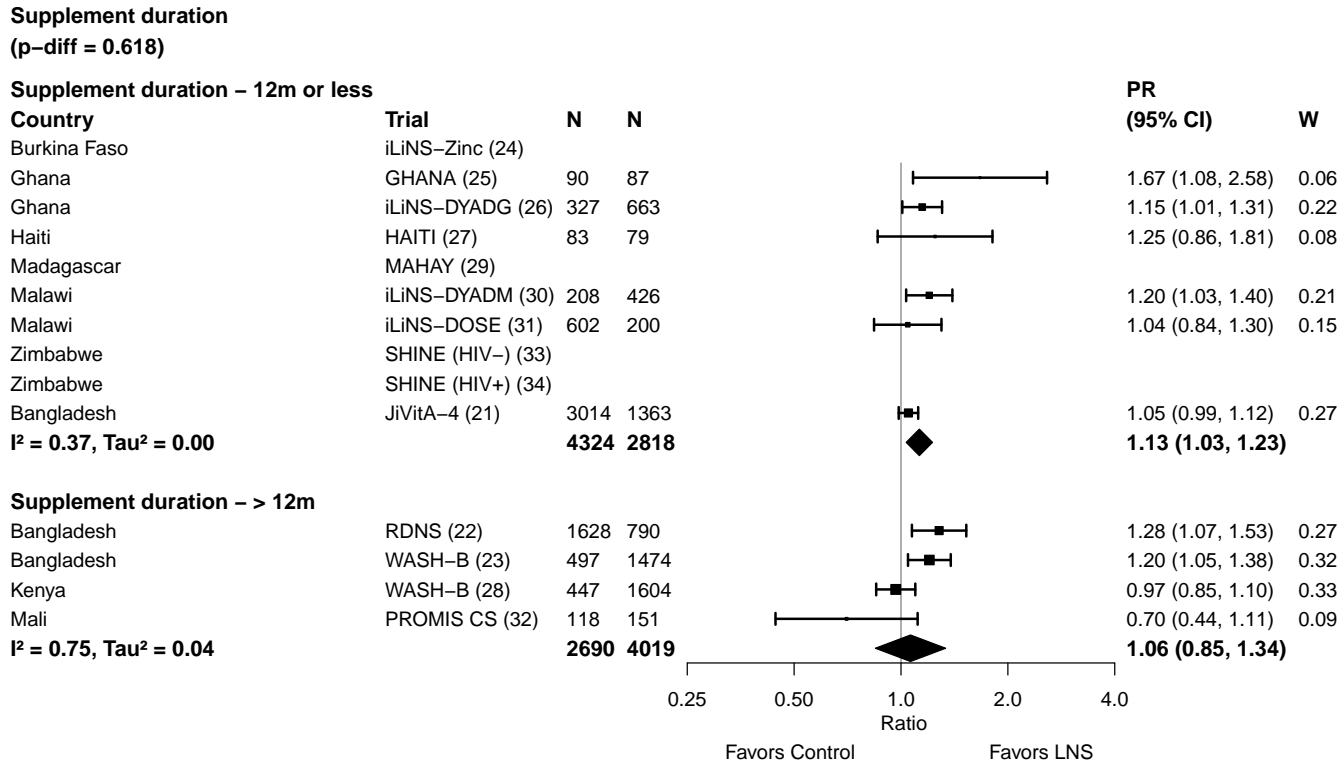

Supplemental figure 4O: 12-mo walking without support prevalence ratio

4O8: Stratified by Frequency of contact

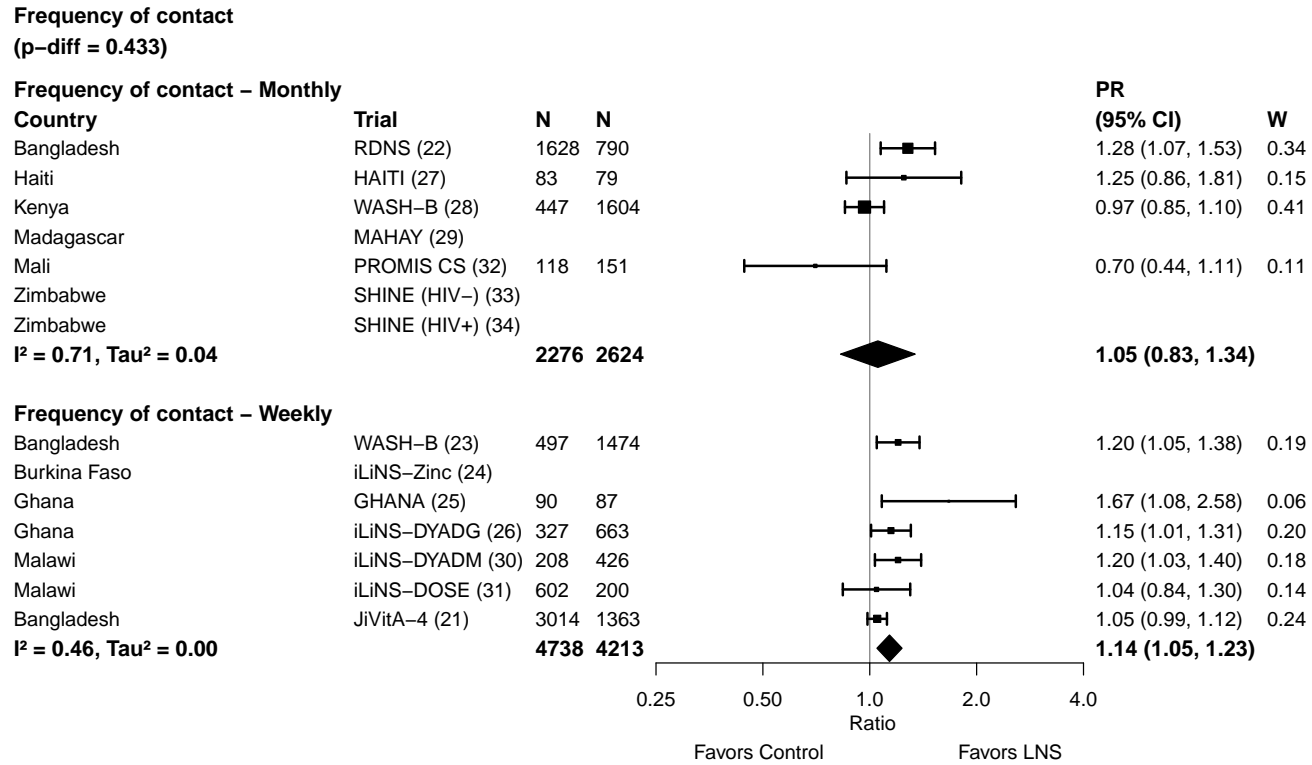

Supplemental figure 4O: 12-mo walking without support prevalence ratio

4O9: Stratified by Average SQ-LNS compliance

**Average SQ-LNS compliance**  
(p-diff = 0.700)

**Average SQ-LNS compliance – Low**

| Country  | Trial             | N           | N           |
|----------|-------------------|-------------|-------------|
| Ghana    | iLiNS-DYADG (26)  | 327         | 663         |
| Malawi   | iLiNS-DYADM (30)  | 208         | 426         |
| Malawi   | iLiNS-DOSE (31)   | 602         | 200         |
| Mali     | PROMIS CS (32)    | 118         | 151         |
| Zimbabwe | SHINE (HIV-) (33) |             |             |
| Zimbabwe | SHINE (HIV+) (34) |             |             |
|          |                   | <b>1255</b> | <b>1440</b> |

**I<sup>2</sup> = 0.43, Tau<sup>2</sup> = 0.02**

**Average SQ-LNS compliance – High**

|              |                 |             |             |
|--------------|-----------------|-------------|-------------|
| Bangladesh   | RDNS (22)       | 1628        | 790         |
| Bangladesh   | WASH-B (23)     | 497         | 1474        |
| Burkina Faso | iLiNS-Zinc (24) |             |             |
| Ghana        | GHANA (25)      | 90          | 87          |
| Haiti        | HAITI (27)      | 83          | 79          |
| Kenya        | WASH-B (28)     | 447         | 1604        |
| Bangladesh   | JiVitA-4 (21)   | 3014        | 1363        |
|              |                 | <b>5759</b> | <b>5397</b> |

**I<sup>2</sup> = 0.64, Tau<sup>2</sup> = 0.01**

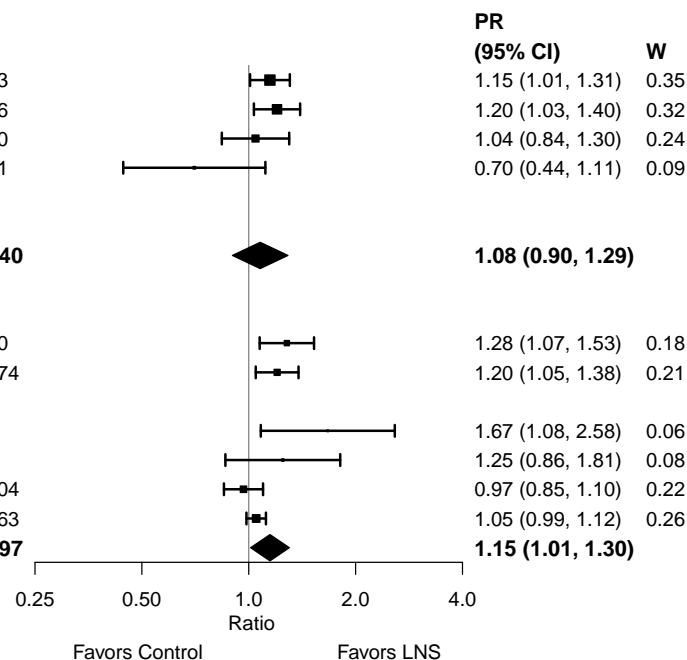

## Supplemental figure 4P: 12-mo walking without support prevalence difference

### 4P1: Stratified by Geographic region

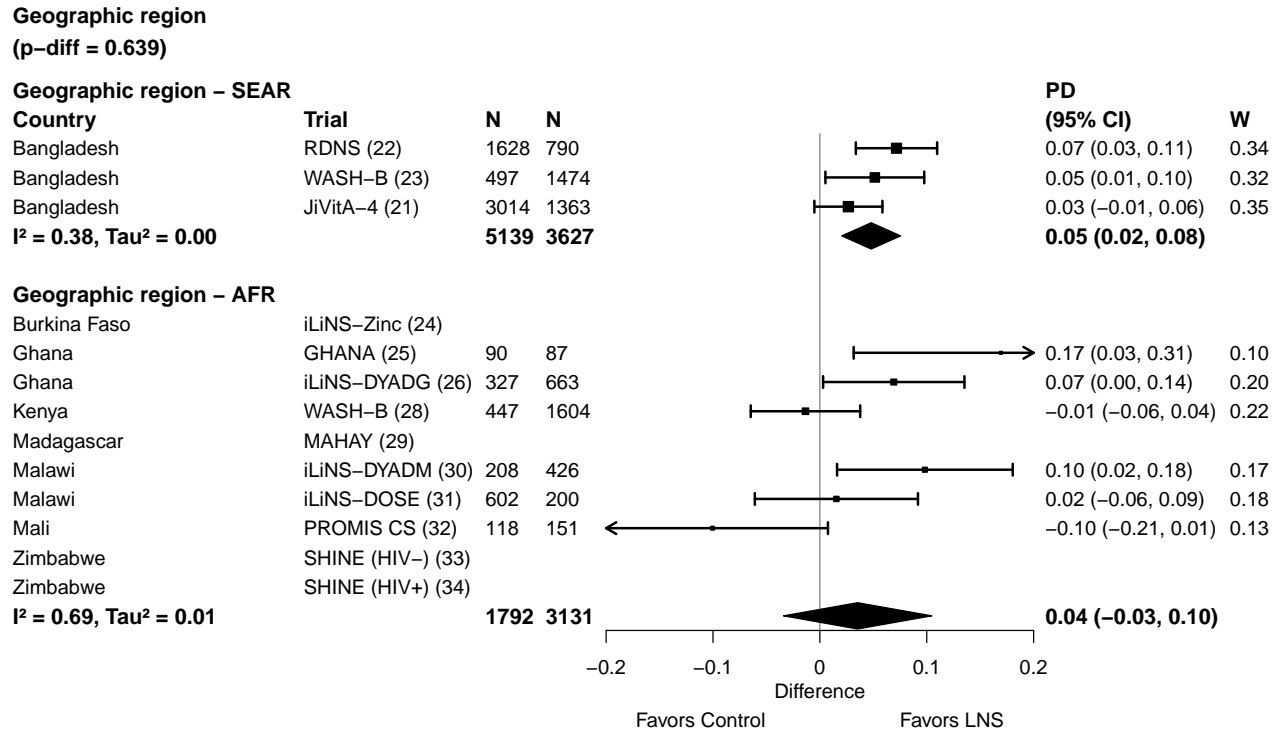

Supplemental figure 4P: 12-mo walking without support prevalence difference

4P2: Stratified by Stunting burden

**Stunting burden**  
(p-diff = 0.316)

**Stunting burden – Less than 35%**

| Country                                             | Trial            | N           | N           | PD (95% CI)              | W    |
|-----------------------------------------------------|------------------|-------------|-------------|--------------------------|------|
| Ghana                                               | GHANA (25)       | 90          | 87          | 0.17 (0.03, 0.31)        | 0.12 |
| Ghana                                               | iLiNS-DYADG (26) | 327         | 663         | 0.07 (0.00, 0.14)        | 0.26 |
| Haiti                                               | HAITI (27)       | 83          | 79          | 0.09 (-0.06, 0.24)       | 0.11 |
| Kenya                                               | WASH-B (28)      | 447         | 1604        | -0.01 (-0.06, 0.04)      | 0.30 |
| Malawi                                              | iLiNS-DYADM (30) | 208         | 426         | 0.10 (0.02, 0.18)        | 0.22 |
| <b>I<sup>2</sup> = 0.62, Tau<sup>2</sup> = 0.00</b> |                  | <b>1155</b> | <b>2859</b> | <b>0.07 (0.01, 0.12)</b> |      |

**Stunting burden – More than 35%**

|                                                     |                   |             |             |                           |      |
|-----------------------------------------------------|-------------------|-------------|-------------|---------------------------|------|
| Bangladesh                                          | RDNS (22)         | 1628        | 790         | 0.07 (0.03, 0.11)         | 0.24 |
| Bangladesh                                          | WASH-B (23)       | 497         | 1474        | 0.05 (0.01, 0.10)         | 0.22 |
| Burkina Faso                                        | iLiNS-Zinc (24)   |             |             |                           |      |
| Madagascar                                          | MAHAY (29)        |             |             |                           |      |
| Malawi                                              | iLiNS-DOSE (31)   | 602         | 200         | 0.02 (-0.06, 0.09)        | 0.17 |
| Mali                                                | PROMIS CS (32)    | 118         | 151         | -0.10 (-0.21, 0.01)       | 0.12 |
| Zimbabwe                                            | SHINE (HIV-) (33) |             |             |                           |      |
| Zimbabwe                                            | SHINE (HIV+) (34) |             |             |                           |      |
| Bangladesh                                          | JiVitA-4 (21)     | 3014        | 1363        | 0.03 (-0.01, 0.06)        | 0.25 |
| <b>I<sup>2</sup> = 0.62, Tau<sup>2</sup> = 0.00</b> |                   | <b>5859</b> | <b>3978</b> | <b>0.03 (-0.02, 0.08)</b> |      |

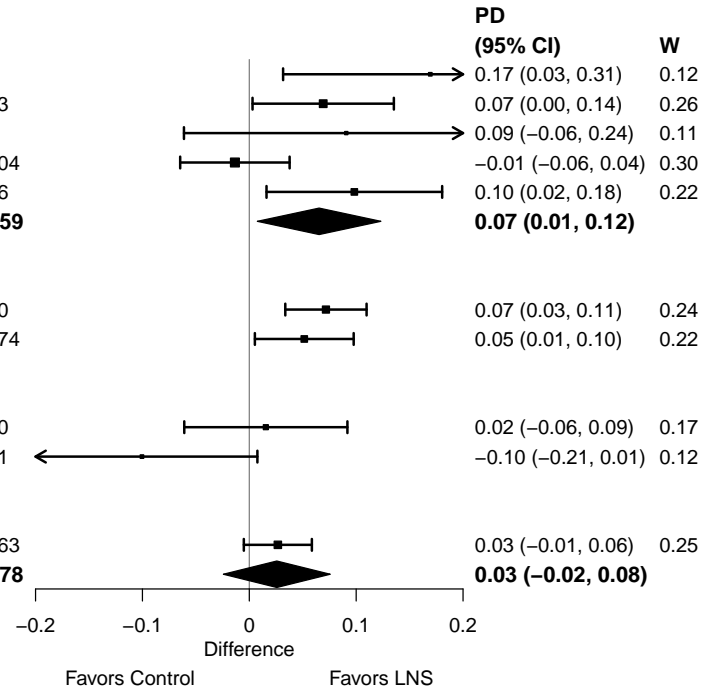

Supplemental figure 4P: 12-mo walking without support prevalence difference

4P3: Stratified by Malaria prevalence

**Malaria prevalence**  
(p-diff = 0.814)

**Malaria prevalence – Less than 10%**

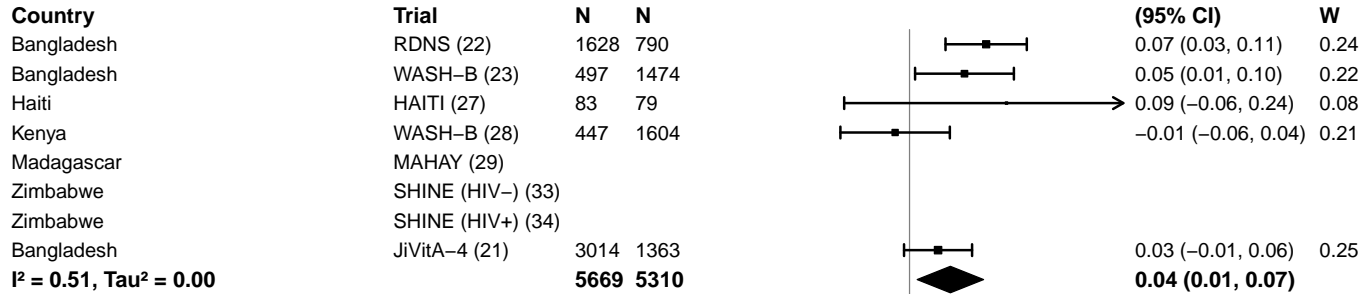

**Malaria prevalence – At least 10%**

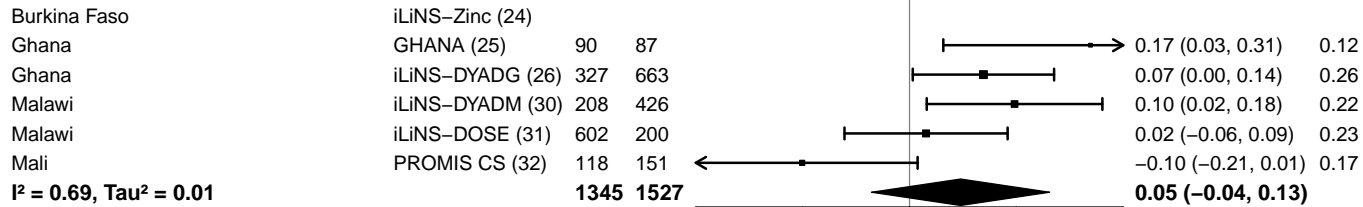

Supplemental figure 4P: 12-mo walking without support prevalence difference

4P4: Stratified by Anemia prevalence

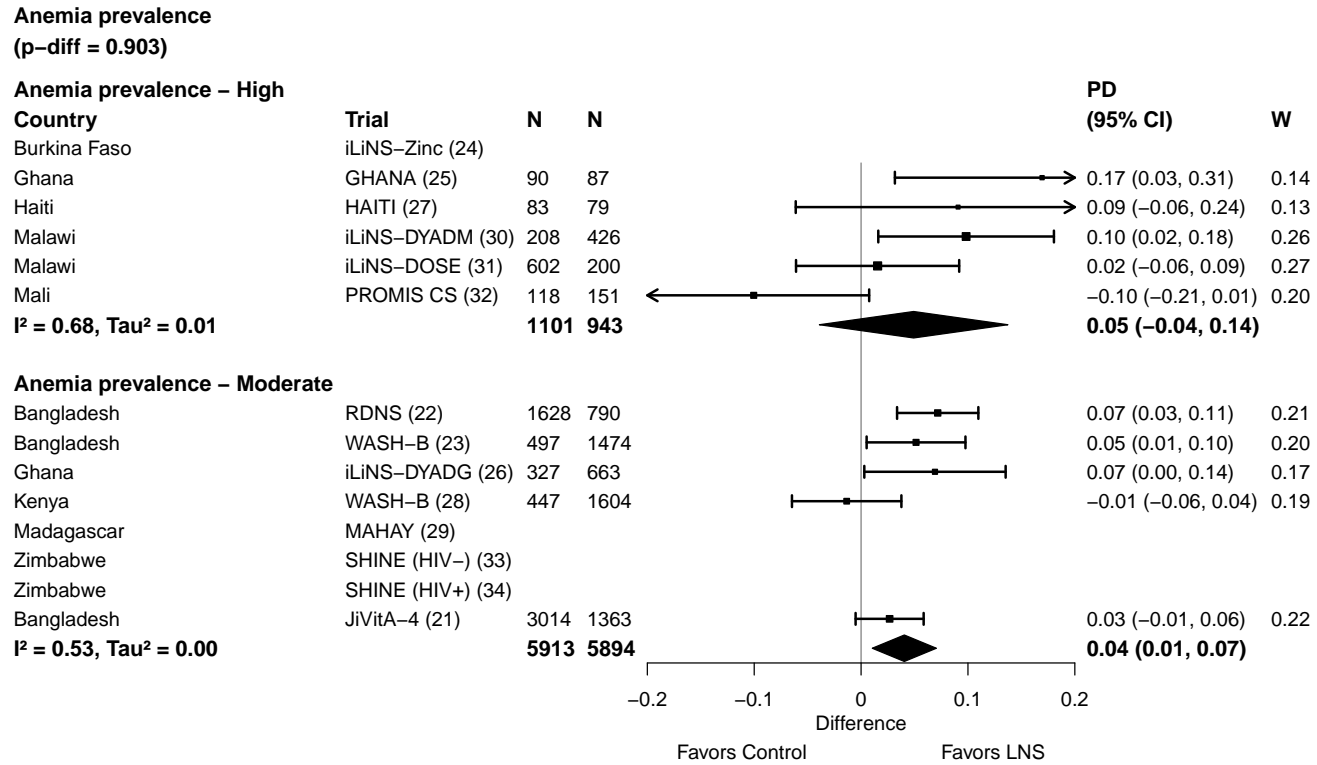

**Supplemental figure 4P: 12-mo walking without support prevalence difference**

**4P5: Stratified by Source water quality (insufficient comparisons)**



Supplemental figure 4P: 12-mo walking without support prevalence difference

4P6: Stratified by Sanitation

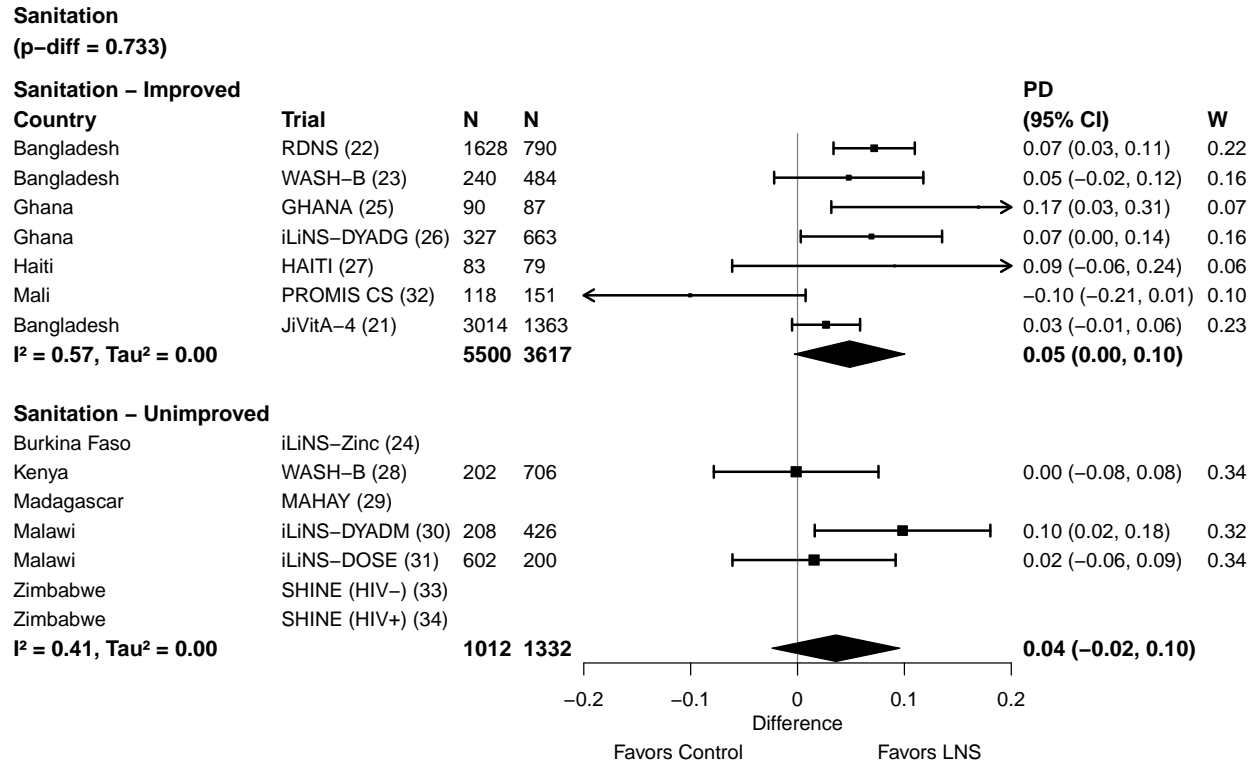

Supplemental figure 4P: 12-mo walking without support prevalence difference

4P7: Stratified by Supplement duration

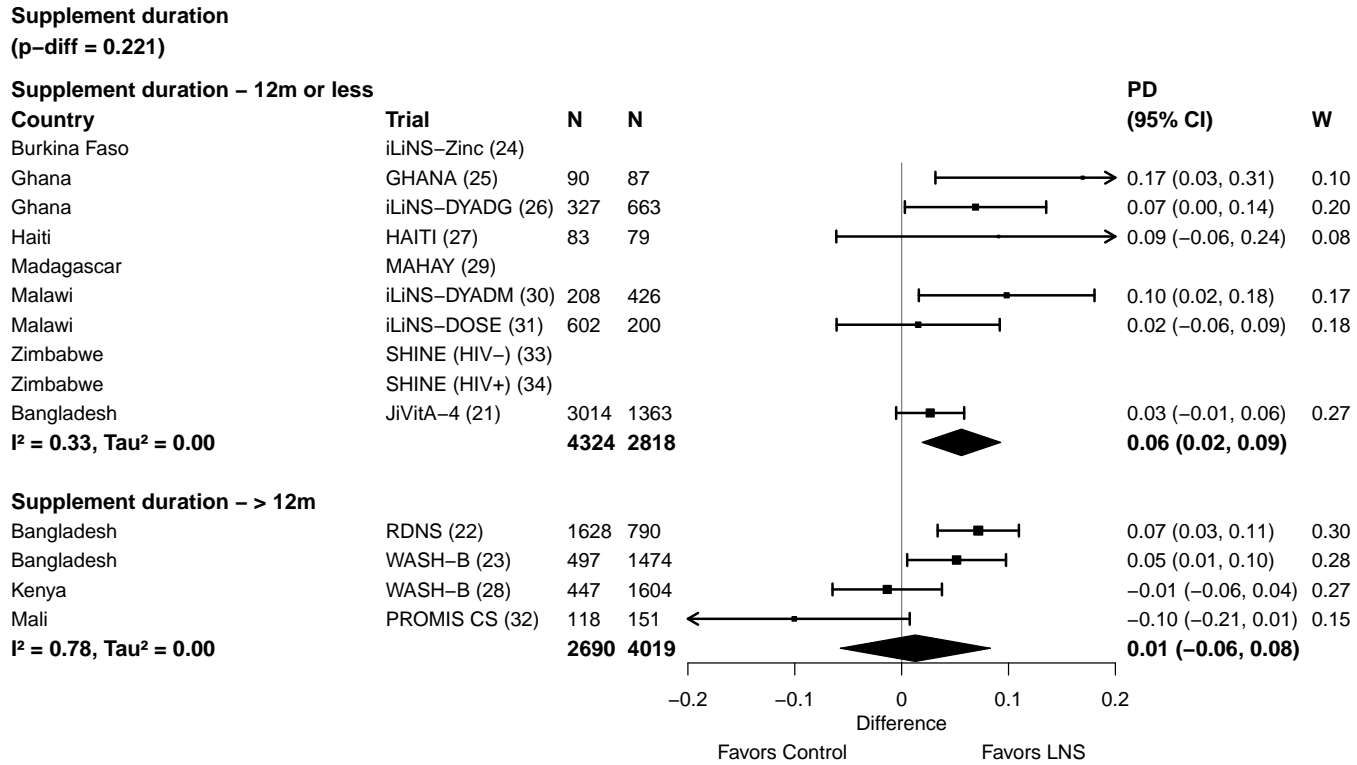

Supplemental figure 4P: 12-mo walking without support prevalence difference

4P8: Stratified by Frequency of contact

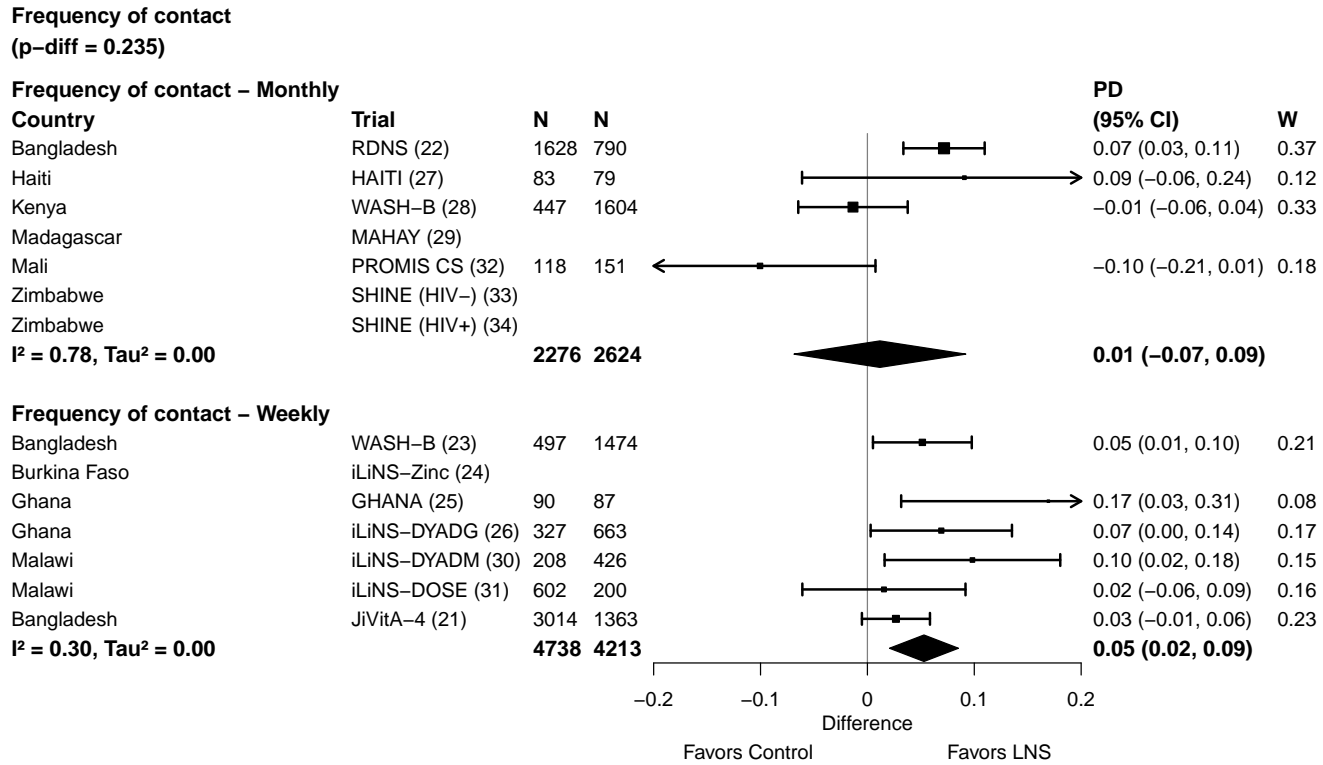

Supplemental figure 4P: 12-mo walking without support prevalence difference

4P9: Stratified by Average SQ-LNS compliance

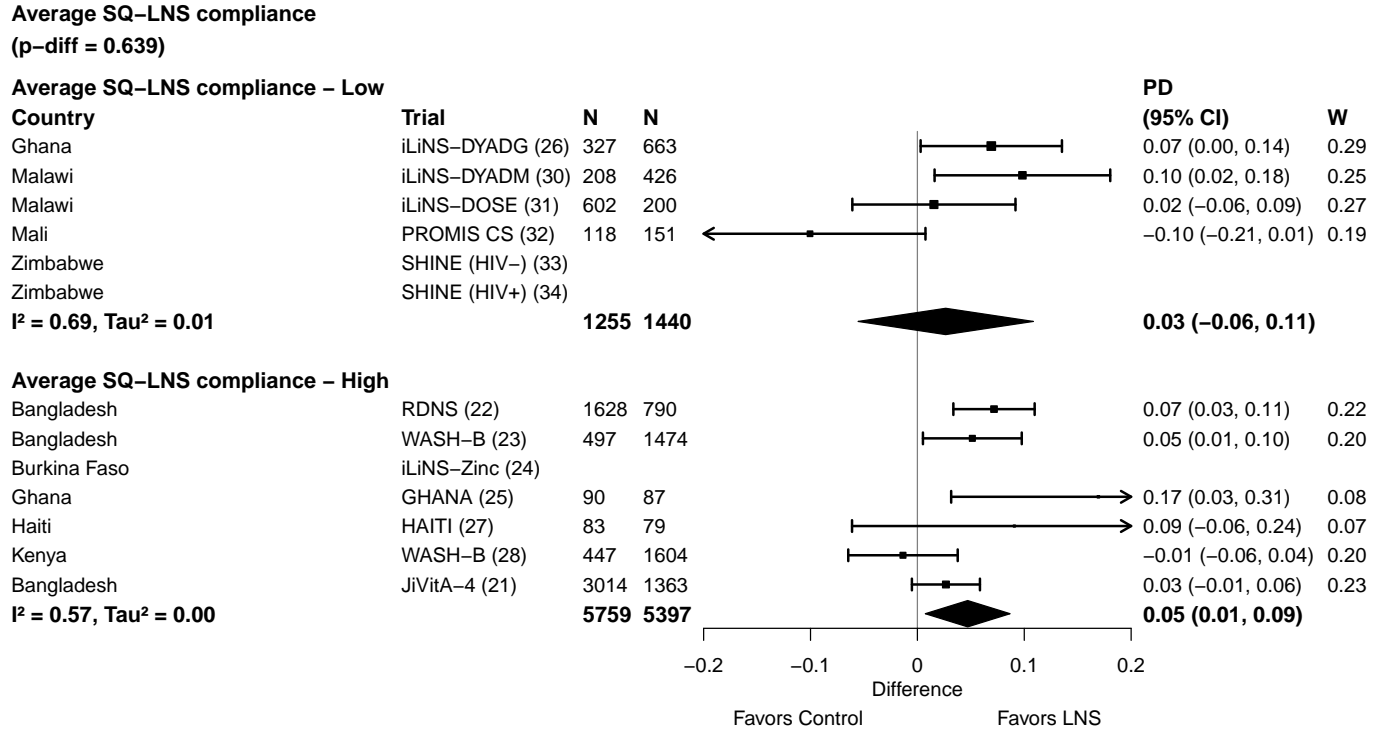

## Supplemental figure 5: Forest plots for effects of SQ-LNS on developmental outcomes stratified by individual-level maternal and child effect modifiers

### Contents

|                                                                             |           |
|-----------------------------------------------------------------------------|-----------|
| <b>Supplemental figure 5A: Mean difference in language z-score</b>          | <b>5</b>  |
| 5A1: Stratified by Maternal height . . . . .                                | 5         |
| 5A2: Stratified by Maternal BMI . . . . .                                   | 6         |
| 5A3: Stratified by Maternal age . . . . .                                   | 7         |
| 5A4: Stratified by Maternal education . . . . .                             | 8         |
| 5A5: Stratified by Maternal depressive symptoms . . . . .                   | 9         |
| 5A6: Stratified by Child sex . . . . .                                      | 10        |
| 5A7: Stratified by Child birth order . . . . .                              | 11        |
| 5A8: Stratified by Child baseline stunting . . . . .                        | 12        |
| 5A9: Stratified by Child baseline acute malnutrition . . . . .              | 13        |
| 5A10: Stratified by Child baseline anemia . . . . .                         | 14        |
| <br>                                                                        |           |
| <b>Supplemental figure 5B: Language lowest decile prevalence ratio</b>      | <b>15</b> |
| 5B1: Stratified by Maternal height . . . . .                                | 15        |
| 5B2: Stratified by Maternal BMI . . . . .                                   | 16        |
| 5B3: Stratified by Maternal age . . . . .                                   | 17        |
| 5B4: Stratified by Maternal education . . . . .                             | 18        |
| 5B5: Stratified by Maternal depressive symptoms . . . . .                   | 19        |
| 5B6: Stratified by Child sex . . . . .                                      | 20        |
| 5B7: Stratified by Child birth order . . . . .                              | 21        |
| 5B8: Stratified by Child baseline stunting . . . . .                        | 22        |
| 5B9: Stratified by Child baseline acute malnutrition . . . . .              | 23        |
| 5B10: Stratified by Child baseline anemia . . . . .                         | 24        |
| <br>                                                                        |           |
| <b>Supplemental figure 5C: Language lowest decile prevalence difference</b> | <b>25</b> |
| 5C1: Stratified by Maternal height . . . . .                                | 25        |
| 5C2: Stratified by Maternal BMI . . . . .                                   | 26        |
| 5C3: Stratified by Maternal age . . . . .                                   | 27        |
| 5C4: Stratified by Maternal education . . . . .                             | 28        |
| 5C5: Stratified by Maternal depressive symptoms . . . . .                   | 29        |
| 5C6: Stratified by Child sex . . . . .                                      | 30        |
| 5C7: Stratified by Child birth order . . . . .                              | 31        |
| 5C8: Stratified by Child baseline stunting . . . . .                        | 32        |
| 5C9: Stratified by Child baseline acute malnutrition . . . . .              | 33        |
| 5C10: Stratified by Child baseline anemia . . . . .                         | 34        |
| <br>                                                                        |           |
| <b>Supplemental figure 5D: Mean difference in social-emotional z-score</b>  | <b>35</b> |
| 5D1: Stratified by Maternal height . . . . .                                | 35        |
| 5D2: Stratified by Maternal BMI . . . . .                                   | 36        |
| 5D3: Stratified by Maternal age . . . . .                                   | 37        |
| 5D4: Stratified by Maternal education . . . . .                             | 38        |

|                                                                                           |           |
|-------------------------------------------------------------------------------------------|-----------|
| 5D5: Stratified by Maternal depressive symptoms . . . . .                                 | 39        |
| 5D6: Stratified by Child sex . . . . .                                                    | 40        |
| 5D7: Stratified by Child birth order . . . . .                                            | 41        |
| 5D8: Stratified by Child baseline stunting . . . . .                                      | 42        |
| 5D9: Stratified by Child baseline acute malnutrition . . . . .                            | 43        |
| 5D10: Stratified by Child baseline anemia . . . . .                                       | 44        |
| <b>Supplemental figure 5E: Social-emotional lowest decile prevalence ratio</b>            | <b>45</b> |
| 5E1: Stratified by Maternal height . . . . .                                              | 45        |
| 5E2: Stratified by Maternal BMI . . . . .                                                 | 46        |
| 5E3: Stratified by Maternal age . . . . .                                                 | 47        |
| 5E4: Stratified by Maternal education . . . . .                                           | 48        |
| 5E5: Stratified by Maternal depressive symptoms . . . . .                                 | 49        |
| 5E6: Stratified by Child sex . . . . .                                                    | 50        |
| 5E7: Stratified by Child birth order . . . . .                                            | 51        |
| 5E8: Stratified by Child baseline stunting . . . . .                                      | 52        |
| 5E9: Stratified by Child baseline acute malnutrition (insufficient comparisons) . . . . . | 53        |
| 5E10: Stratified by Child baseline anemia . . . . .                                       | 54        |
| <b>Supplemental figure 5F: Social-emotional lowest decile prevalence difference</b>       | <b>55</b> |
| 5F1: Stratified by Maternal height . . . . .                                              | 55        |
| 5F2: Stratified by Maternal BMI . . . . .                                                 | 56        |
| 5F3: Stratified by Maternal age . . . . .                                                 | 57        |
| 5F4: Stratified by Maternal education . . . . .                                           | 58        |
| 5F5: Stratified by Maternal depressive symptoms . . . . .                                 | 59        |
| 5F6: Stratified by Child sex . . . . .                                                    | 60        |
| 5F7: Stratified by Child birth order . . . . .                                            | 61        |
| 5F8: Stratified by Child baseline stunting . . . . .                                      | 62        |
| 5F9: Stratified by Child baseline acute malnutrition (insufficient comparisons) . . . . . | 63        |
| 5F10: Stratified by Child baseline anemia . . . . .                                       | 64        |
| <b>Supplemental figure 5G: Mean difference in motor z-score</b>                           | <b>65</b> |
| 5G1: Stratified by Maternal height . . . . .                                              | 65        |
| 5G2: Stratified by Maternal BMI . . . . .                                                 | 66        |
| 5G3: Stratified by Maternal age . . . . .                                                 | 67        |
| 5G4: Stratified by Maternal education . . . . .                                           | 68        |
| 5G5: Stratified by Maternal depressive symptoms . . . . .                                 | 69        |
| 5G6: Stratified by Child sex . . . . .                                                    | 70        |
| 5G7: Stratified by Child birth order . . . . .                                            | 71        |
| 5G8: Stratified by Child baseline stunting . . . . .                                      | 72        |
| 5G9: Stratified by Child baseline acute malnutrition . . . . .                            | 73        |
| 5G10: Stratified by Child baseline anemia . . . . .                                       | 74        |
| <b>Supplemental figure 5H: Motor lowest decile prevalence ratio</b>                       | <b>75</b> |
| 5H1: Stratified by Maternal height . . . . .                                              | 75        |
| 5H2: Stratified by Maternal BMI . . . . .                                                 | 76        |
| 5H3: Stratified by Maternal age . . . . .                                                 | 77        |
| 5H4: Stratified by Maternal education . . . . .                                           | 78        |
| 5H5: Stratified by Maternal depressive symptoms . . . . .                                 | 79        |
| 5H6: Stratified by Child sex . . . . .                                                    | 80        |
| 5H7: Stratified by Child birth order . . . . .                                            | 81        |

|                                                                              |            |
|------------------------------------------------------------------------------|------------|
| 5H8: Stratified by Child baseline stunting . . . . .                         | 82         |
| 5H9: Stratified by Child baseline acute malnutrition . . . . .               | 83         |
| 5H10: Stratified by Child baseline anemia . . . . .                          | 84         |
| <b>Supplemental figure 5I: Motor lowest decile prevalence difference</b>     | <b>85</b>  |
| 5I1: Stratified by Maternal height . . . . .                                 | 85         |
| 5I2: Stratified by Maternal BMI . . . . .                                    | 86         |
| 5I3: Stratified by Maternal age . . . . .                                    | 87         |
| 5I4: Stratified by Maternal education . . . . .                              | 88         |
| 5I5: Stratified by Maternal depressive symptoms . . . . .                    | 89         |
| 5I6: Stratified by Child sex . . . . .                                       | 90         |
| 5I7: Stratified by Child birth order . . . . .                               | 91         |
| 5I8: Stratified by Child baseline stunting . . . . .                         | 92         |
| 5I9: Stratified by Child baseline acute malnutrition . . . . .               | 93         |
| 5I10: Stratified by Child baseline anemia . . . . .                          | 94         |
| <b>Supplemental figure 5J: Mean difference in gross motor z-score</b>        | <b>95</b>  |
| 5J1: Stratified by Maternal height . . . . .                                 | 95         |
| 5J2: Stratified by Maternal BMI . . . . .                                    | 96         |
| 5J3: Stratified by Maternal age . . . . .                                    | 97         |
| 5J4: Stratified by Maternal education . . . . .                              | 98         |
| 5J5: Stratified by Maternal depressive symptoms . . . . .                    | 99         |
| 5J6: Stratified by Child sex . . . . .                                       | 100        |
| 5J7: Stratified by Child birth order . . . . .                               | 101        |
| 5J8: Stratified by Child baseline stunting . . . . .                         | 102        |
| 5J9: Stratified by Child baseline acute malnutrition . . . . .               | 103        |
| 5J10: Stratified by Child baseline anemia . . . . .                          | 104        |
| <b>Supplemental figure 5K: Mean difference in fine motor z-score</b>         | <b>105</b> |
| 5K1: Stratified by Maternal height . . . . .                                 | 105        |
| 5K2: Stratified by Maternal BMI . . . . .                                    | 106        |
| 5K3: Stratified by Maternal age . . . . .                                    | 107        |
| 5K4: Stratified by Maternal education . . . . .                              | 108        |
| 5K5: Stratified by Maternal depressive symptoms . . . . .                    | 109        |
| 5K6: Stratified by Child sex . . . . .                                       | 110        |
| 5K7: Stratified by Child birth order . . . . .                               | 111        |
| 5K8: Stratified by Child baseline stunting . . . . .                         | 112        |
| 5K9: Stratified by Child baseline acute malnutrition . . . . .               | 113        |
| 5K10: Stratified by Child baseline anemia . . . . .                          | 114        |
| <b>Supplemental figure 5L: Mean difference in executive function z-score</b> | <b>115</b> |
| 5L1: Stratified by Maternal height . . . . .                                 | 115        |
| 5L2: Stratified by Maternal BMI . . . . .                                    | 116        |
| 5L3: Stratified by Maternal age . . . . .                                    | 117        |
| 5L4: Stratified by Maternal education . . . . .                              | 118        |
| 5L5: Stratified by Maternal depressive symptoms . . . . .                    | 119        |
| 5L6: Stratified by Child sex . . . . .                                       | 120        |
| 5L7: Stratified by Child birth order . . . . .                               | 121        |
| 5L8: Stratified by Child baseline stunting . . . . .                         | 122        |
| 5L9: Stratified by Child baseline acute malnutrition . . . . .               | 123        |
| 5L10: Stratified by Child baseline anemia . . . . .                          | 124        |

|                                                                                       |            |
|---------------------------------------------------------------------------------------|------------|
| <b>Supplemental figure 5M: Executive function lowest decile prevalence ratio</b>      | <b>125</b> |
| 5M1: Stratified by Maternal height (insufficient comparisons)                         | 125        |
| 5M2: Stratified by Maternal BMI                                                       | 126        |
| 5M3: Stratified by Maternal age                                                       | 127        |
| 5M4: Stratified by Maternal education                                                 | 128        |
| 5M5: Stratified by Maternal depressive symptoms                                       | 129        |
| 5M6: Stratified by Child sex                                                          | 130        |
| 5M7: Stratified by Child birth order                                                  | 131        |
| 5M8: Stratified by Child baseline stunting                                            | 132        |
| 5M9: Stratified by Child baseline acute malnutrition (insufficient comparisons)       | 133        |
| 5M10: Stratified by Child baseline anemia                                             | 134        |
| <b>Supplemental figure 5N: Executive function lowest decile prevalence difference</b> | <b>135</b> |
| 5N1: Stratified by Maternal height (insufficient comparisons)                         | 135        |
| 5N2: Stratified by Maternal BMI                                                       | 136        |
| 5N3: Stratified by Maternal age                                                       | 137        |
| 5N4: Stratified by Maternal education                                                 | 138        |
| 5N5: Stratified by Maternal depressive symptoms                                       | 139        |
| 5N6: Stratified by Child sex                                                          | 140        |
| 5N7: Stratified by Child birth order                                                  | 141        |
| 5N8: Stratified by Child baseline stunting                                            | 142        |
| 5N9: Stratified by Child baseline acute malnutrition (insufficient comparisons)       | 143        |
| 5N10: Stratified by Child baseline anemia                                             | 144        |
| <b>Supplemental figure 5O: 12-mo walking without support prevalence ratio</b>         | <b>145</b> |
| 5O1: Stratified by Maternal height                                                    | 145        |
| 5O2: Stratified by Maternal BMI                                                       | 146        |
| 5O3: Stratified by Maternal age                                                       | 147        |
| 5O4: Stratified by Maternal education                                                 | 148        |
| 5O5: Stratified by Maternal depressive symptoms                                       | 149        |
| 5O6: Stratified by Child sex                                                          | 150        |
| 5O7: Stratified by Child birth order                                                  | 151        |
| 5O8: Stratified by Child baseline stunting                                            | 152        |
| 5O9: Stratified by Child baseline acute malnutrition                                  | 153        |
| 5O10: Stratified by Child baseline anemia                                             | 154        |
| <b>Supplemental figure 5P: 12-mo walking without support prevalence difference</b>    | <b>155</b> |
| 5P1: Stratified by Maternal height                                                    | 155        |
| 5P2: Stratified by Maternal BMI                                                       | 156        |
| 5P3: Stratified by Maternal age                                                       | 157        |
| 5P4: Stratified by Maternal education                                                 | 158        |
| 5P5: Stratified by Maternal depressive symptoms                                       | 159        |
| 5P6: Stratified by Child sex                                                          | 160        |
| 5P7: Stratified by Child birth order                                                  | 161        |
| 5P8: Stratified by Child baseline stunting                                            | 162        |
| 5P9: Stratified by Child baseline acute malnutrition                                  | 163        |
| 5P10: Stratified by Child baseline anemia                                             | 164        |



These figures are forest plots showing the individual-level effect modification of intervention effects. Each figure has the estimates of intervention effect stratified within study by individual-level effect modifier category. For dichotomous outcomes analyzed via prevalence ratios, the effect estimate is the prevalence in the LNS group divided by the prevalence in the control group. For dichotomous outcomes analyzed via prevalence differences, the effect estimate is the prevalence in the LNS group minus the prevalence in the control group. The labels on the far left correspond to trial level information. In the middle left and on the right the values indicate the study level effect estimate, confidence interval, and weighting for deriving the pooled estimates is shown by subgroup.

Motor milestone figures show individual trial estimates excluding the JiVitA-4 data because those individual trial results have not yet been published. The pooled estimate in each figure includes the JiVitA-4 data for consistency with all other analyses.

### Supplemental figure 5A: Mean difference in language z-score

#### 5A1: Stratified by Maternal height

**P-for-interaction = 0.857**  
**Difference in MDs = -0.01 (-0.09, 0.07)**

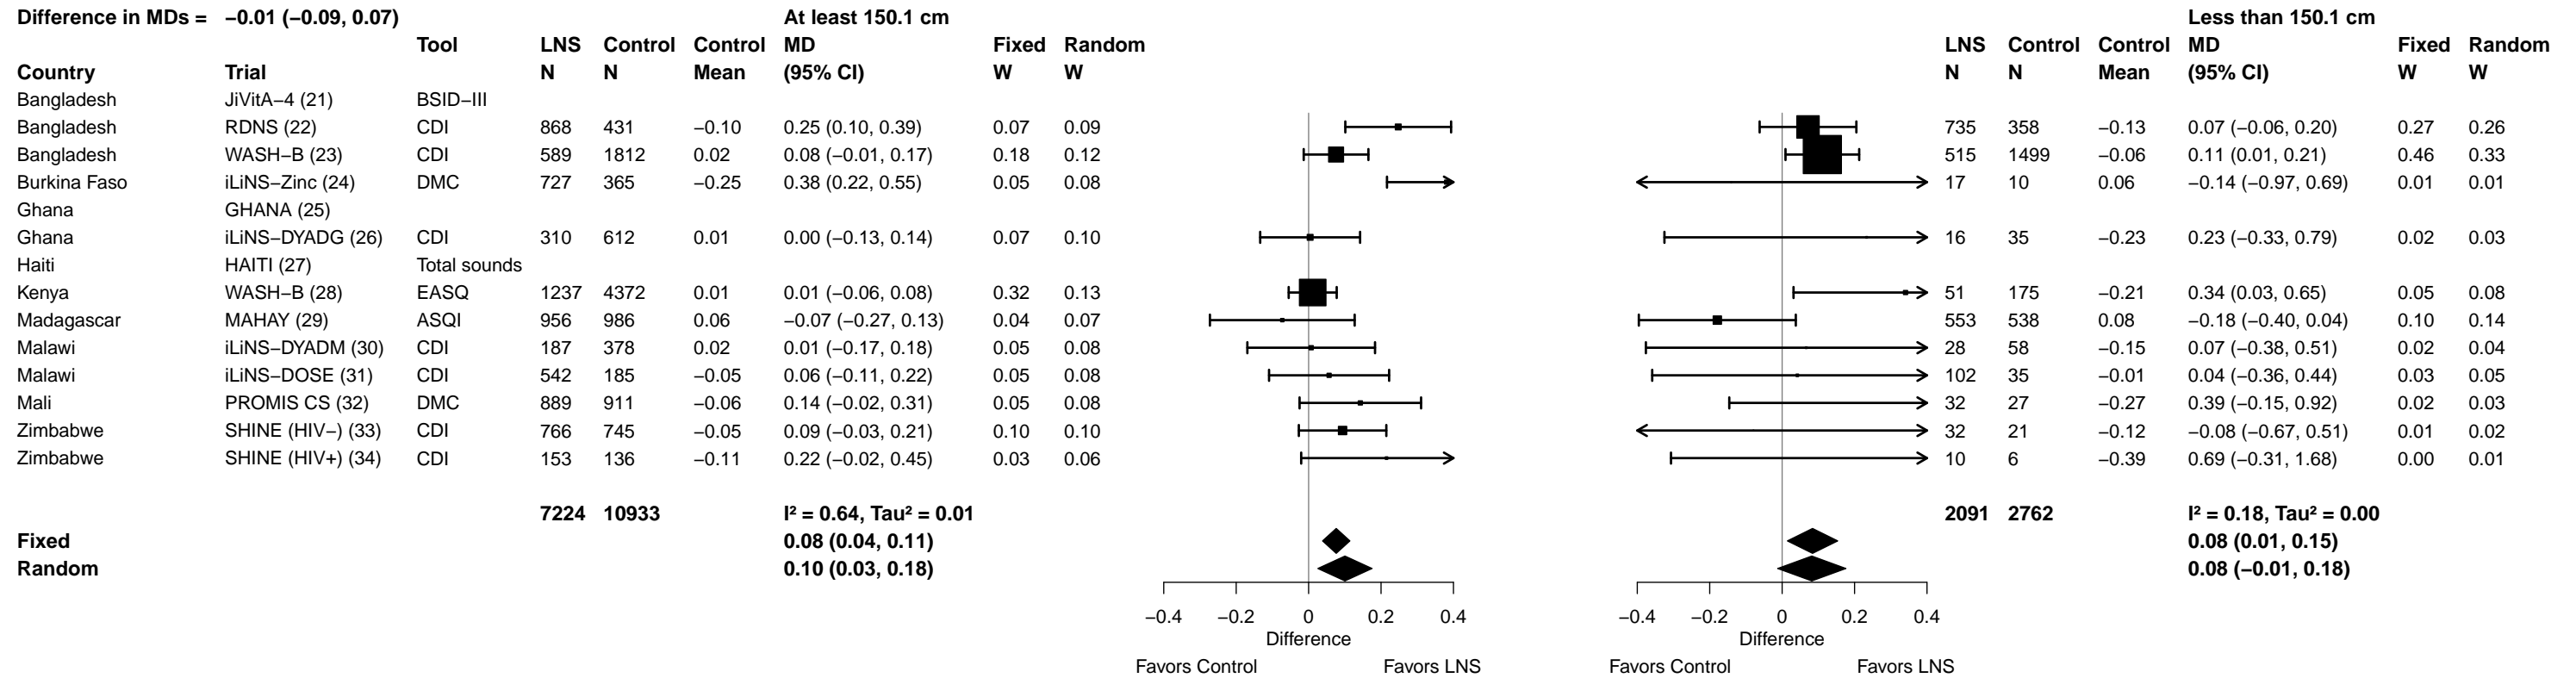

Supplemental figure 5A: Mean difference in language z-score

5A2: Stratified by Maternal BMI

P-for-interaction = 0.194  
 Difference in MDs = -0.04 (-0.11, 0.02)

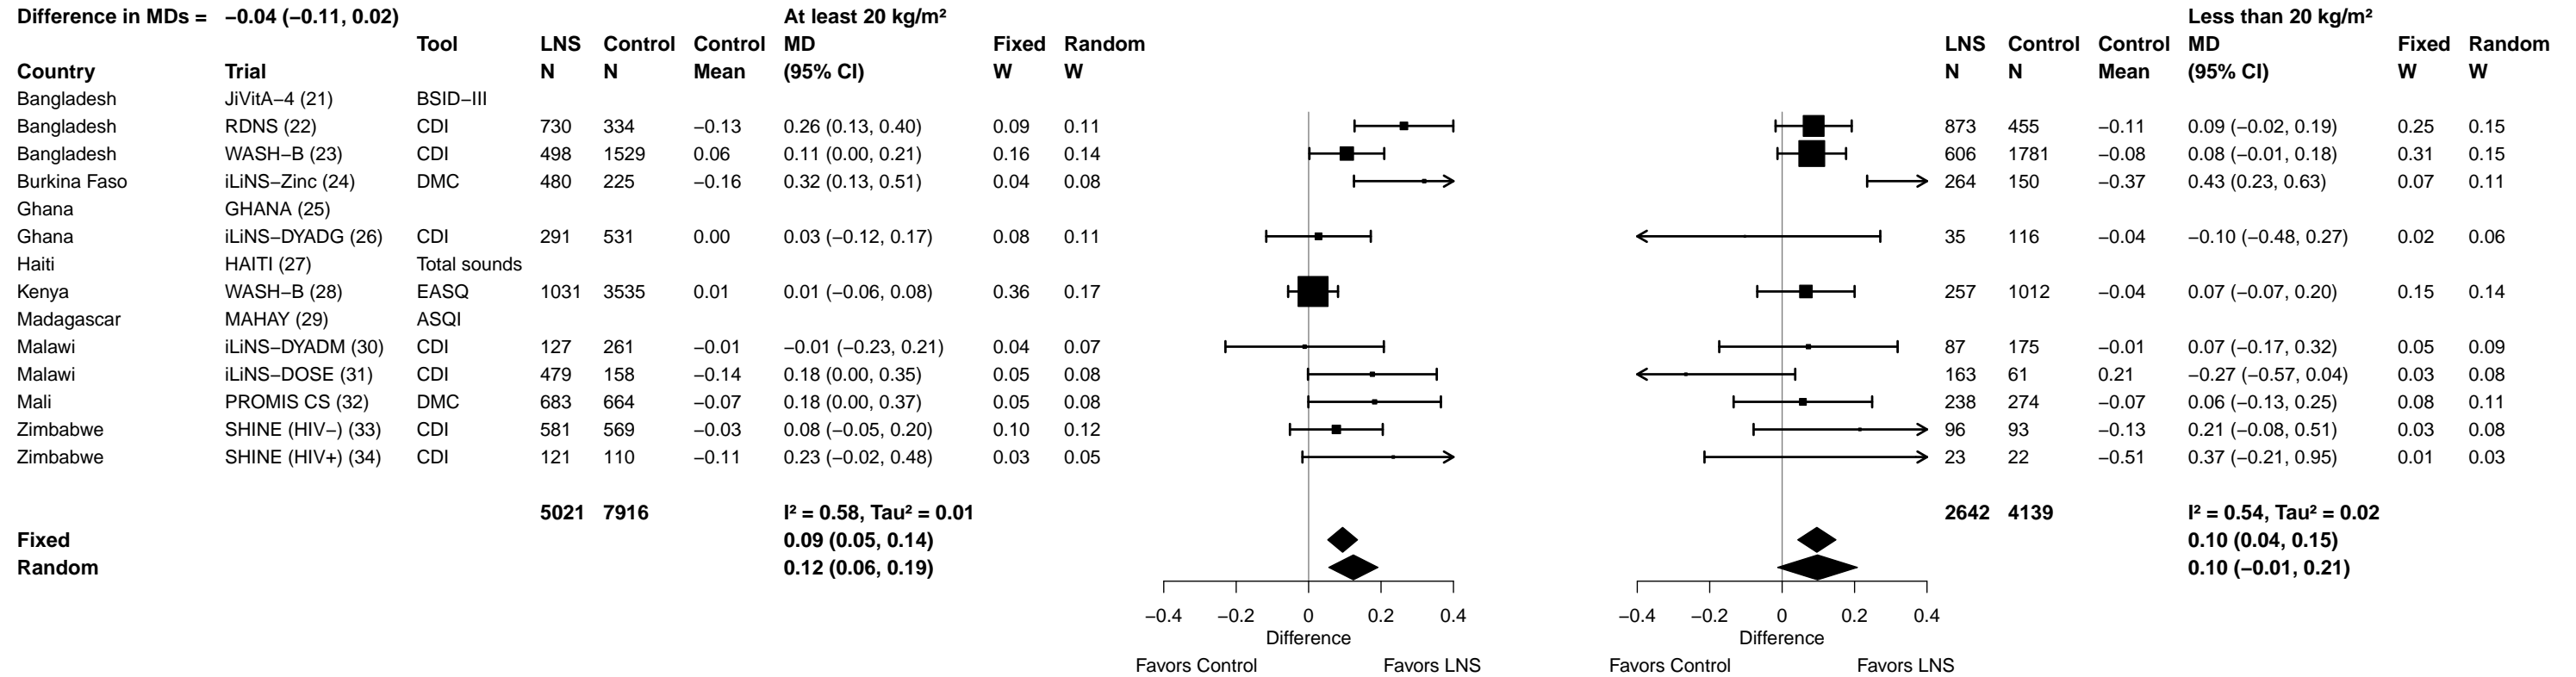

Supplemental figure 5A: Mean difference in language z-score

5A3: Stratified by Maternal age

P-for-interaction = 0.361  
 Difference in MDs = -0.03 (-0.08, 0.03)

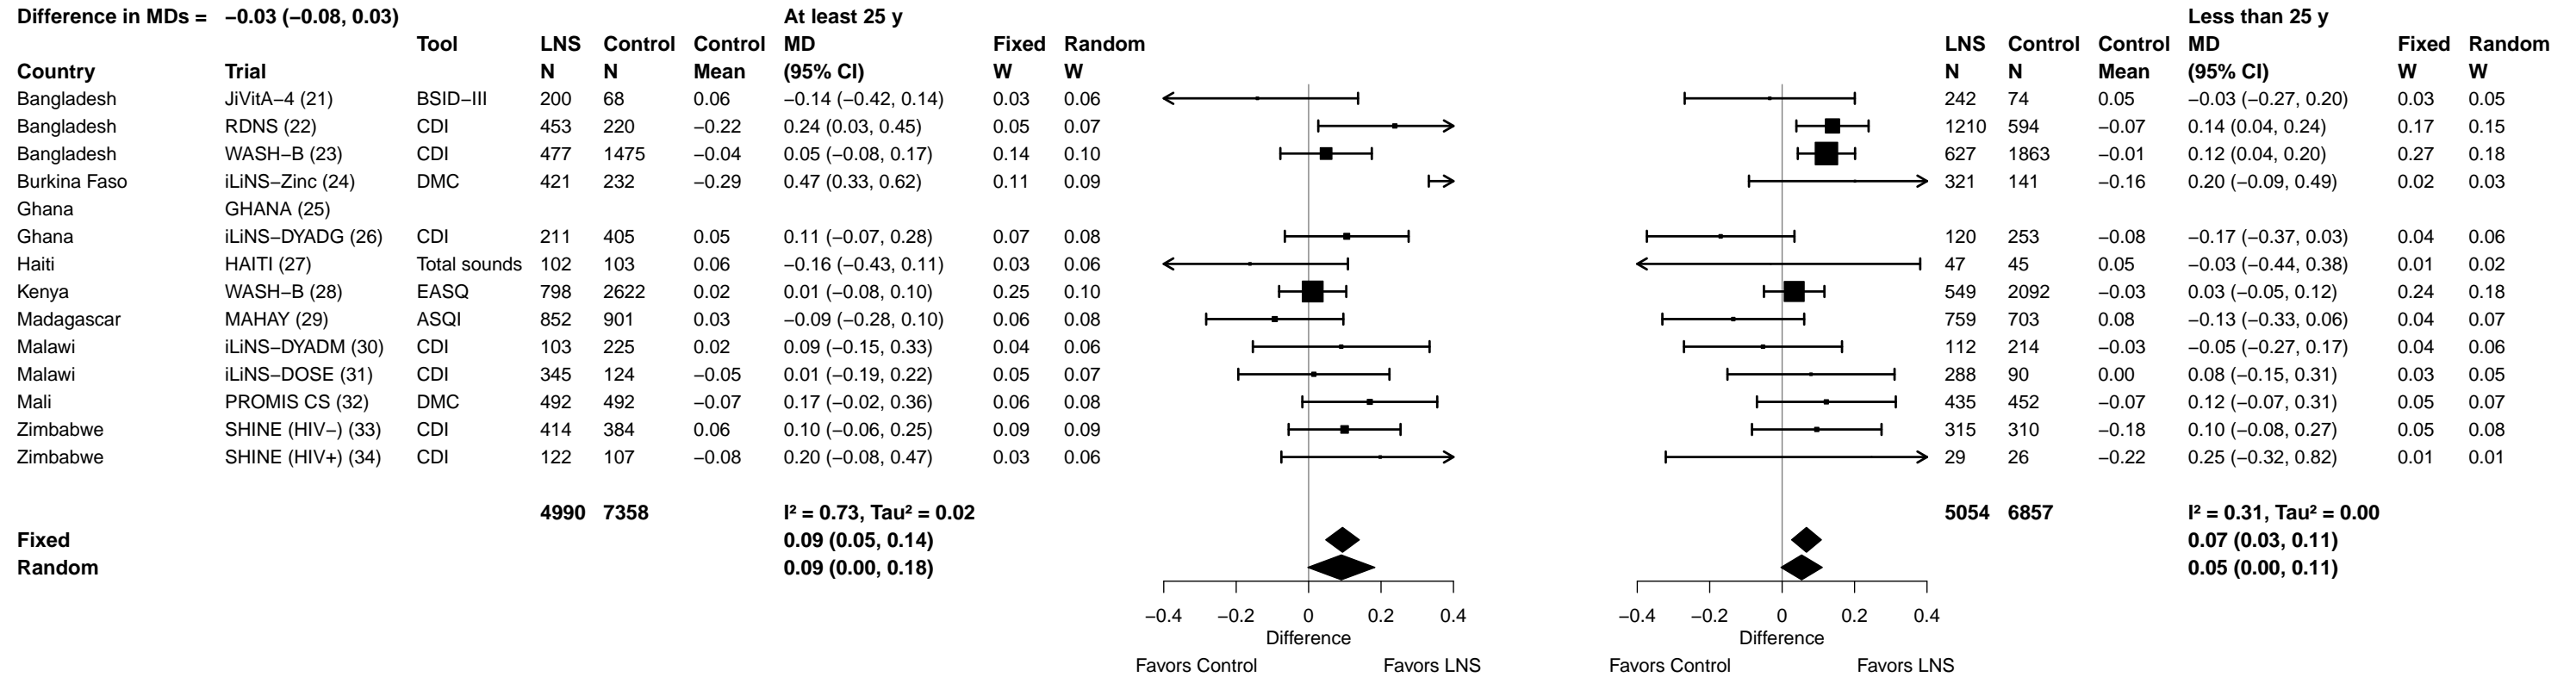

Supplemental figure 5A: Mean difference in language z-score

5A4: Stratified by Maternal education

**P-for-interaction = 0.411**  
**Difference in MDs = 0.03 (-0.04, 0.09)**

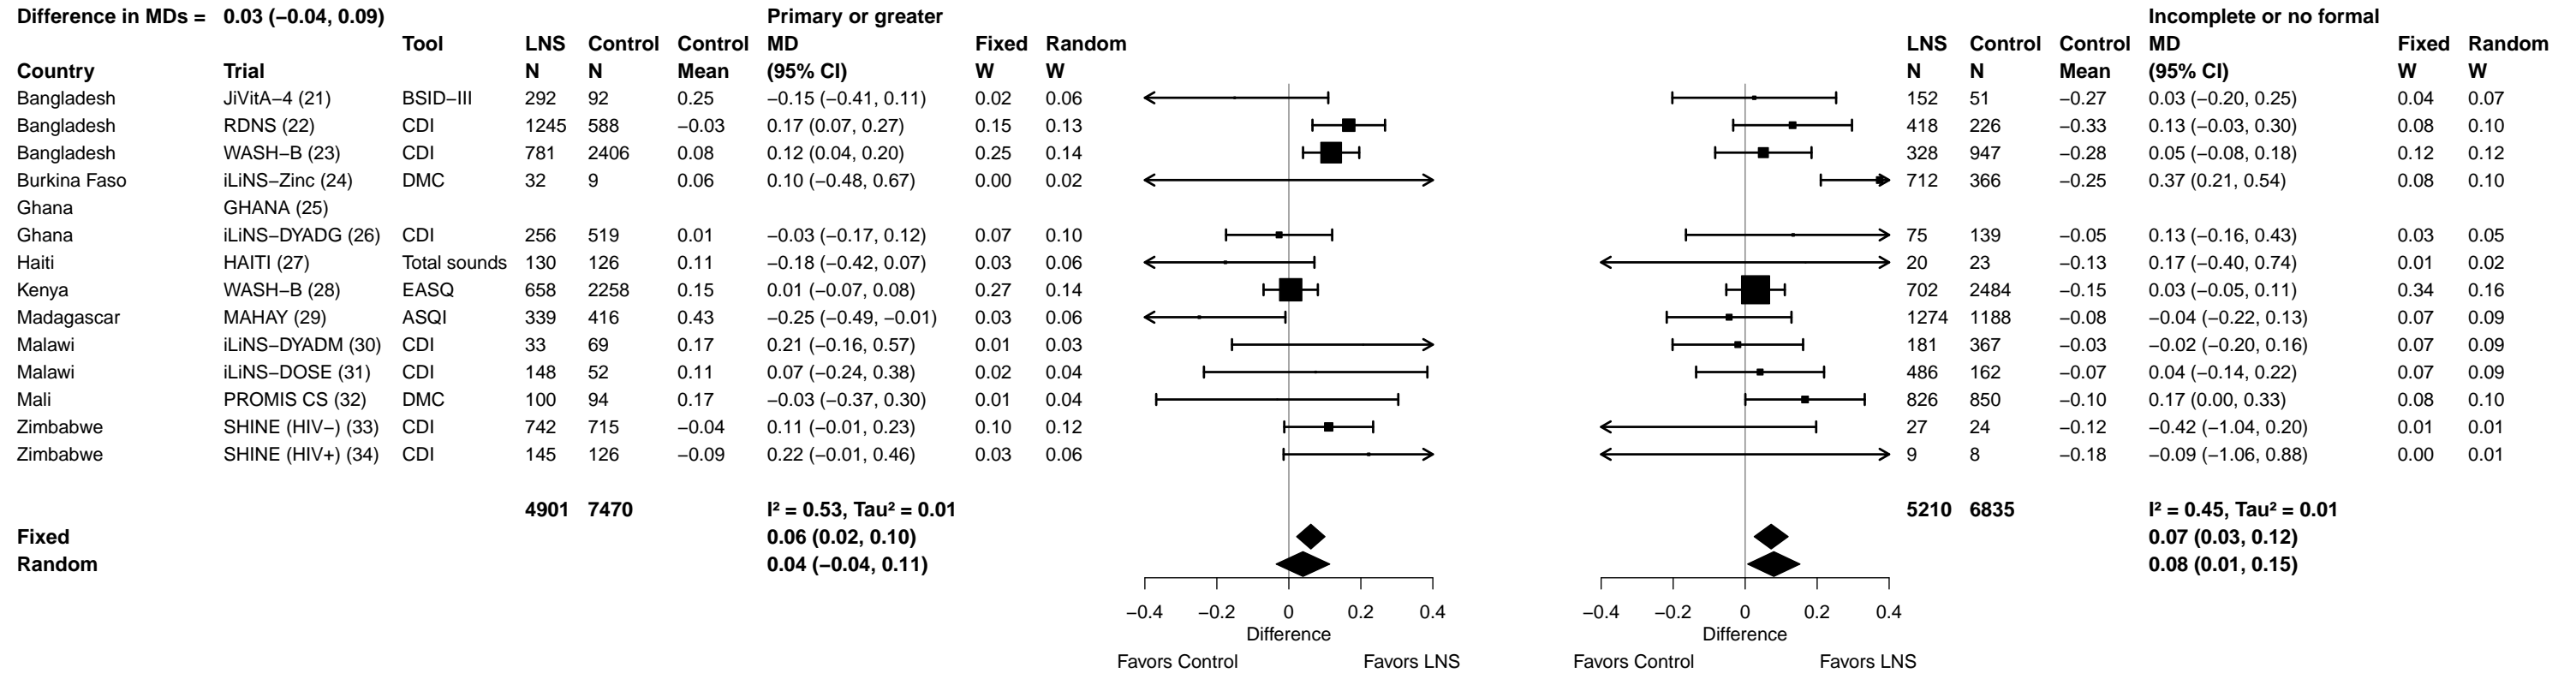

Supplemental figure 5A: Mean difference in language z-score

5A5: Stratified by Maternal depressive symptoms

**P-for-interaction = 0.950**  
**Difference in MDs = 0.00 (-0.07, 0.08)**

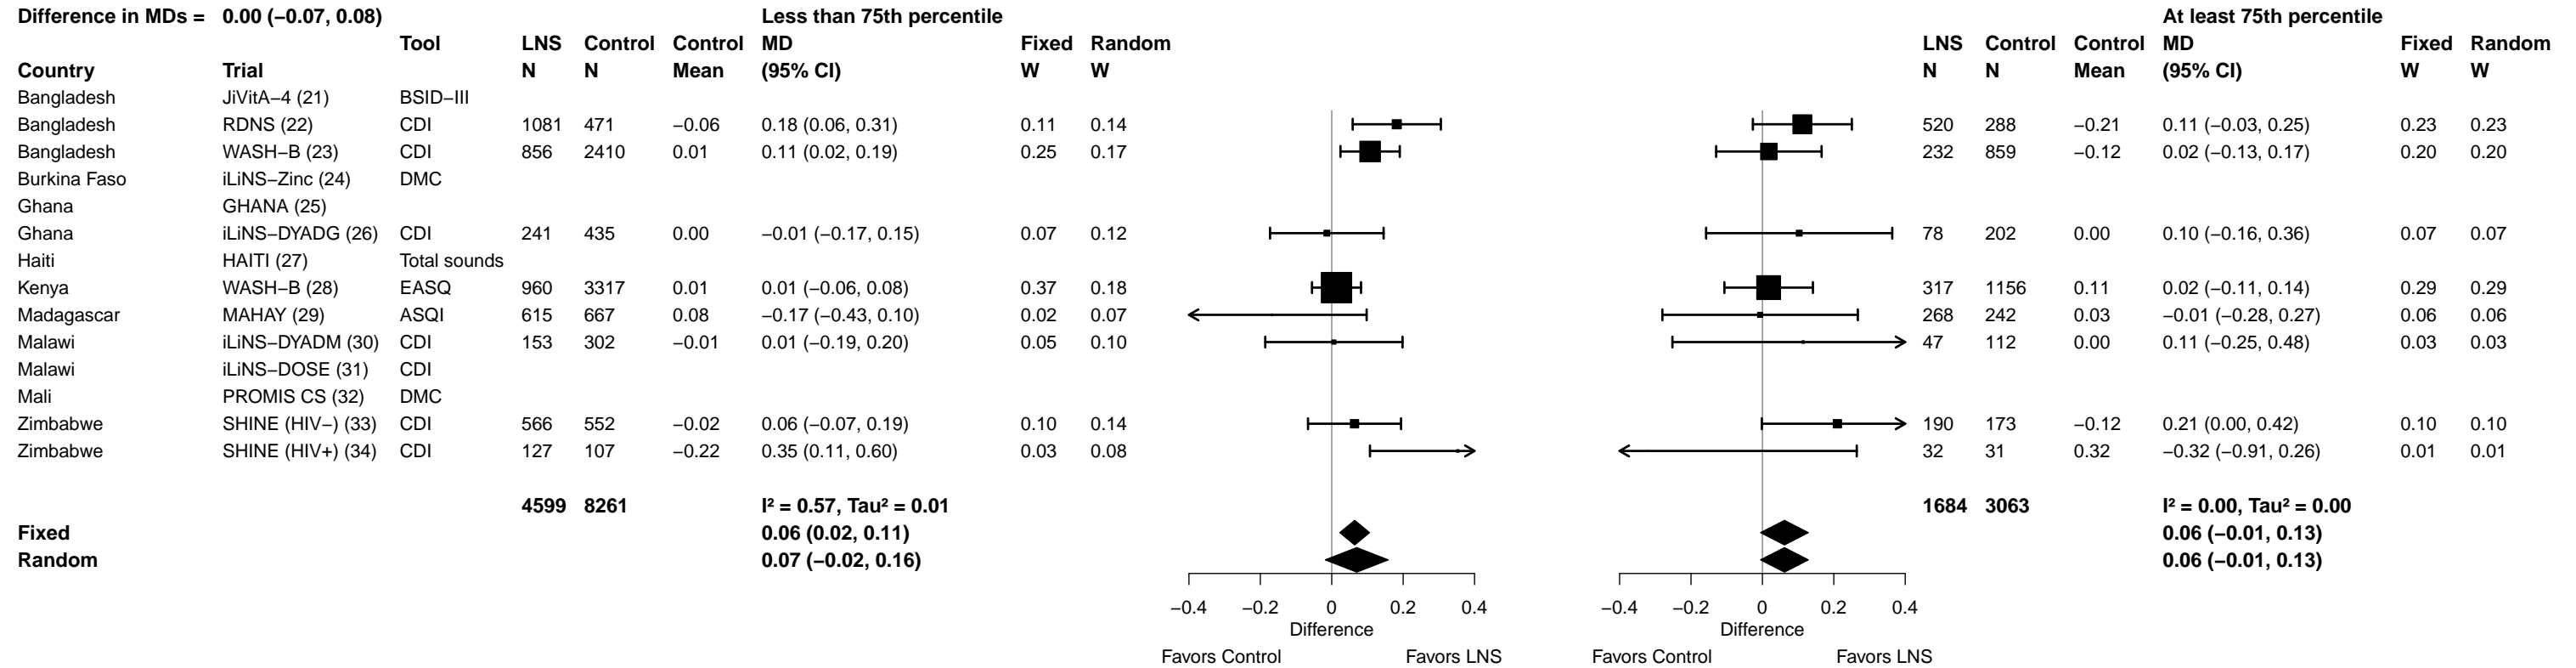

Supplemental figure 5A: Mean difference in language z-score

5A6: Stratified by Child sex

P-for-interaction = 0.424  
 Difference in MDs = 0.02 (-0.03, 0.08)

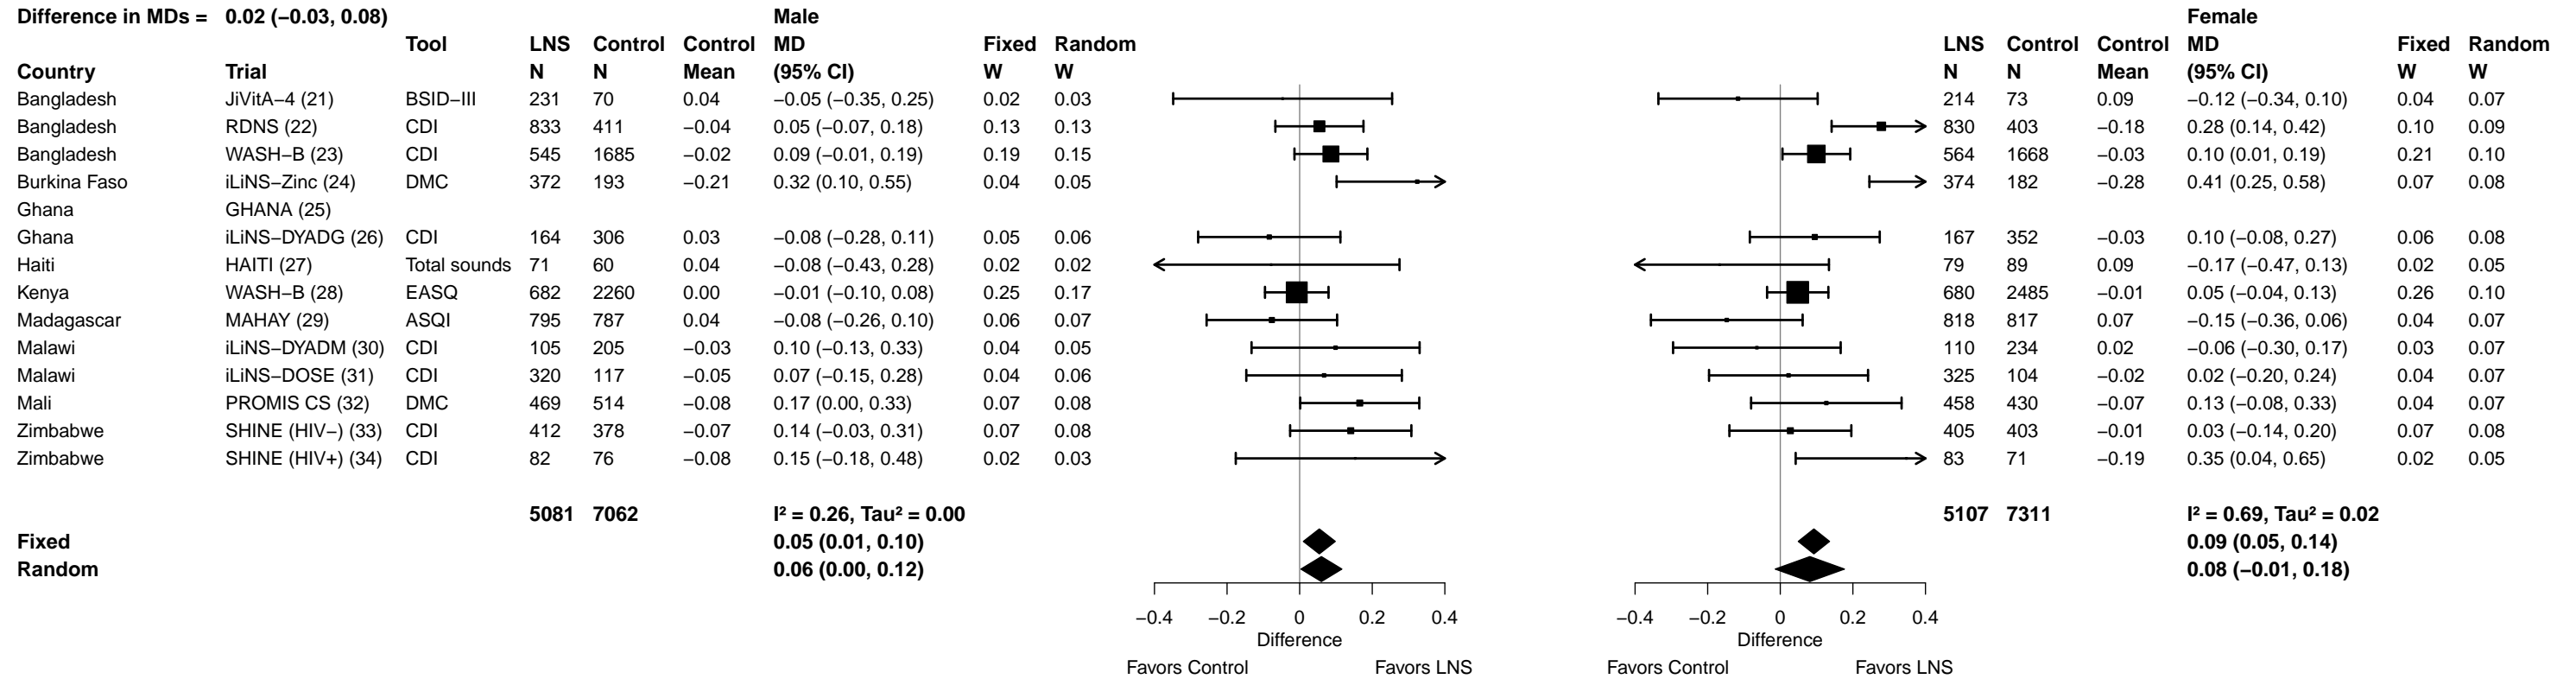

Supplemental figure 5A: Mean difference in language z-score

5A7: Stratified by Child birth order

P-for-interaction = 0.519  
 Difference in MDs = -0.02 (-0.09, 0.04)

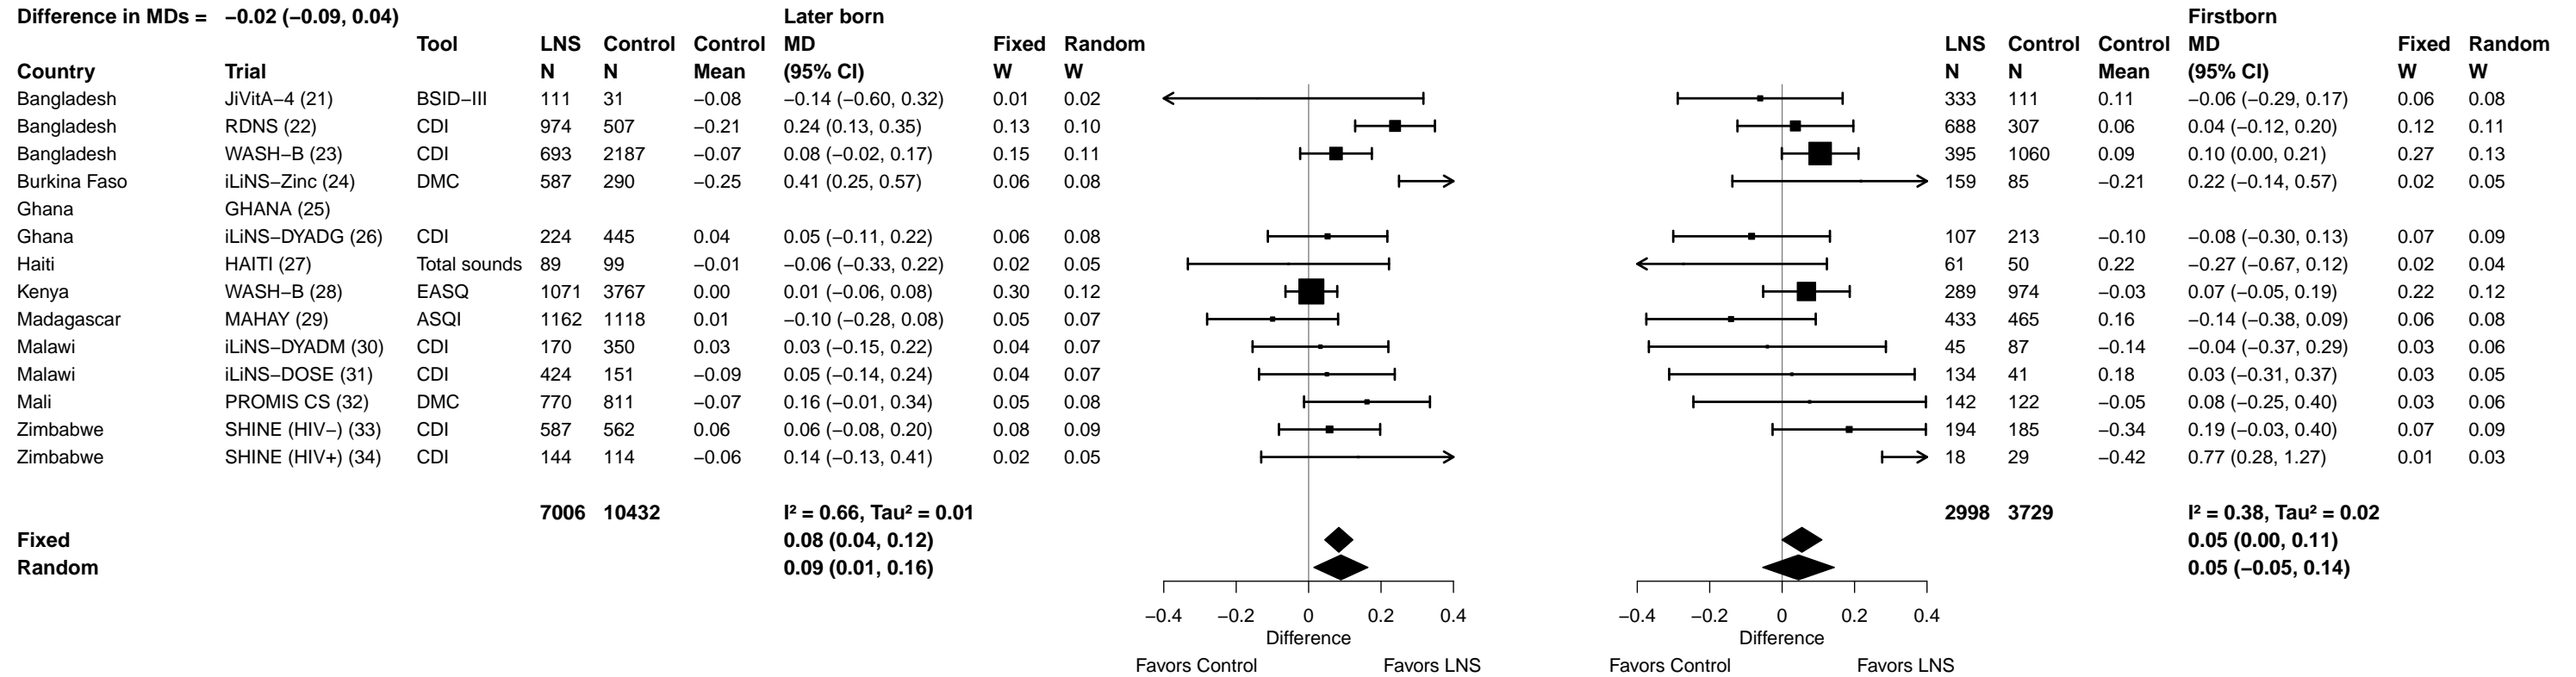



Supplemental figure 5A: Mean difference in language z-score

5A8: Stratified by Child baseline stunting

P-for-interaction = 0.255  
 Difference in MDs = 0.07 (-0.05, 0.20)

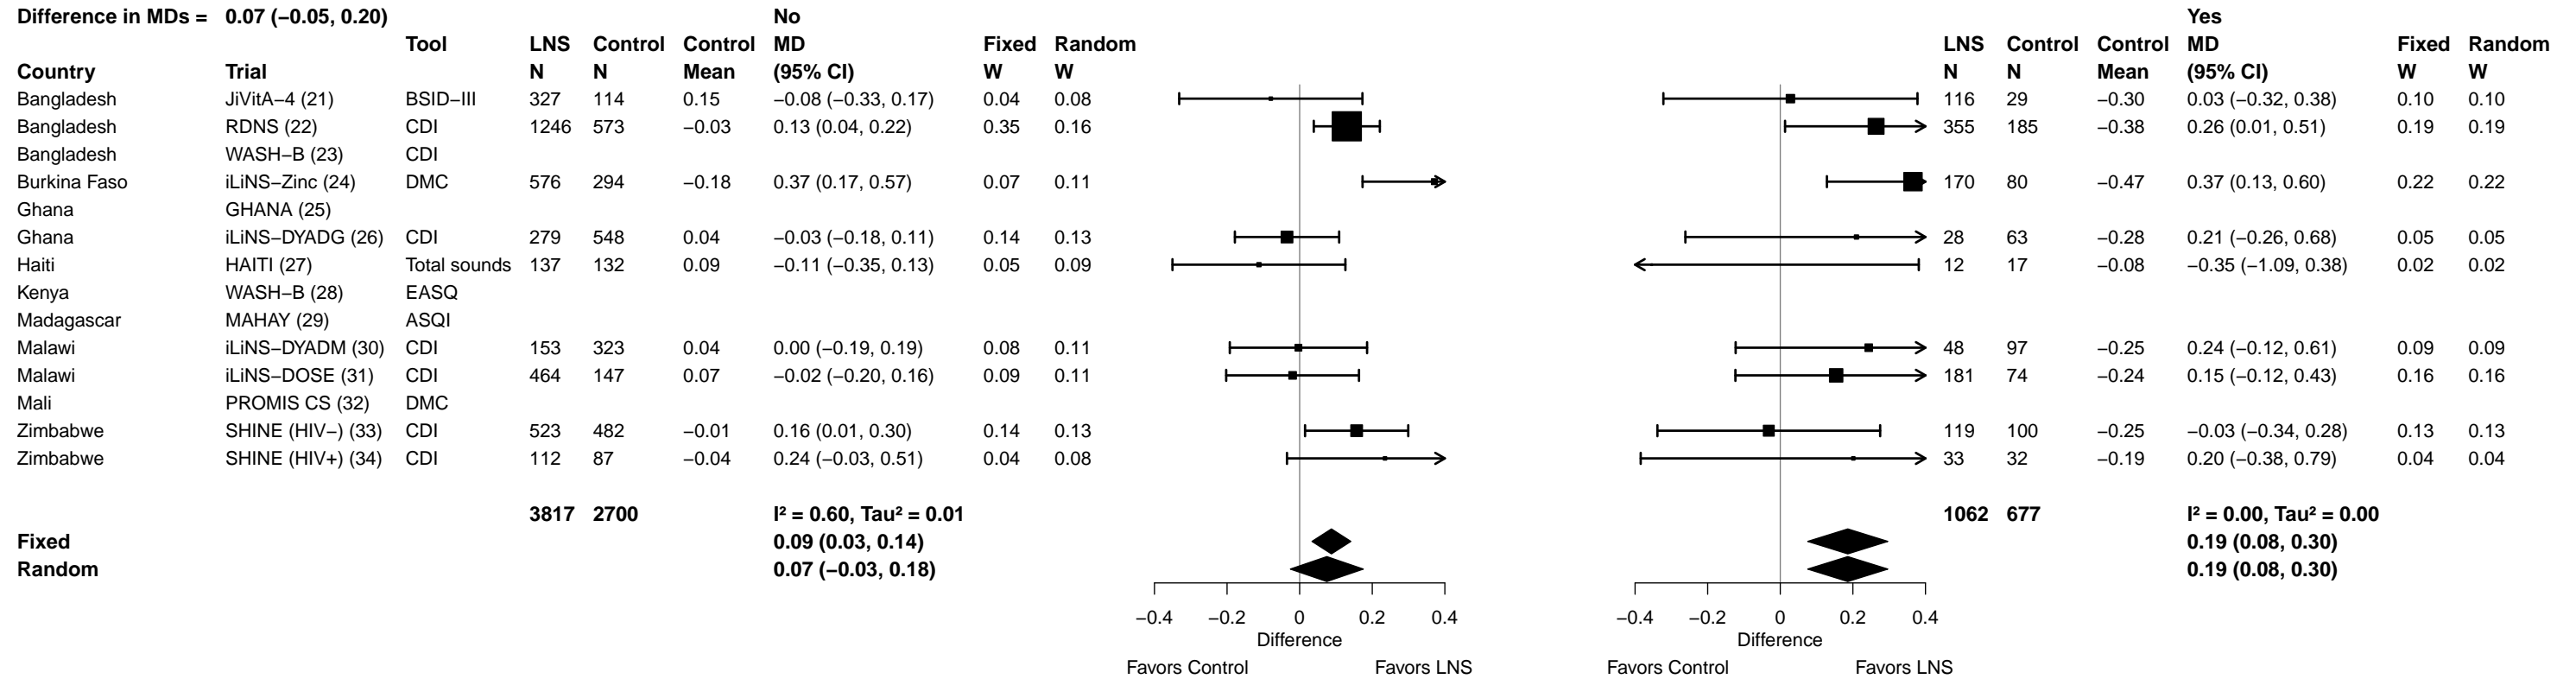

Supplemental figure 5A: Mean difference in language z-score

5A9: Stratified by Child baseline acute malnutrition

**P-for-interaction = 0.034**  
**Difference in MDs = 0.16 (0.01, 0.31)**

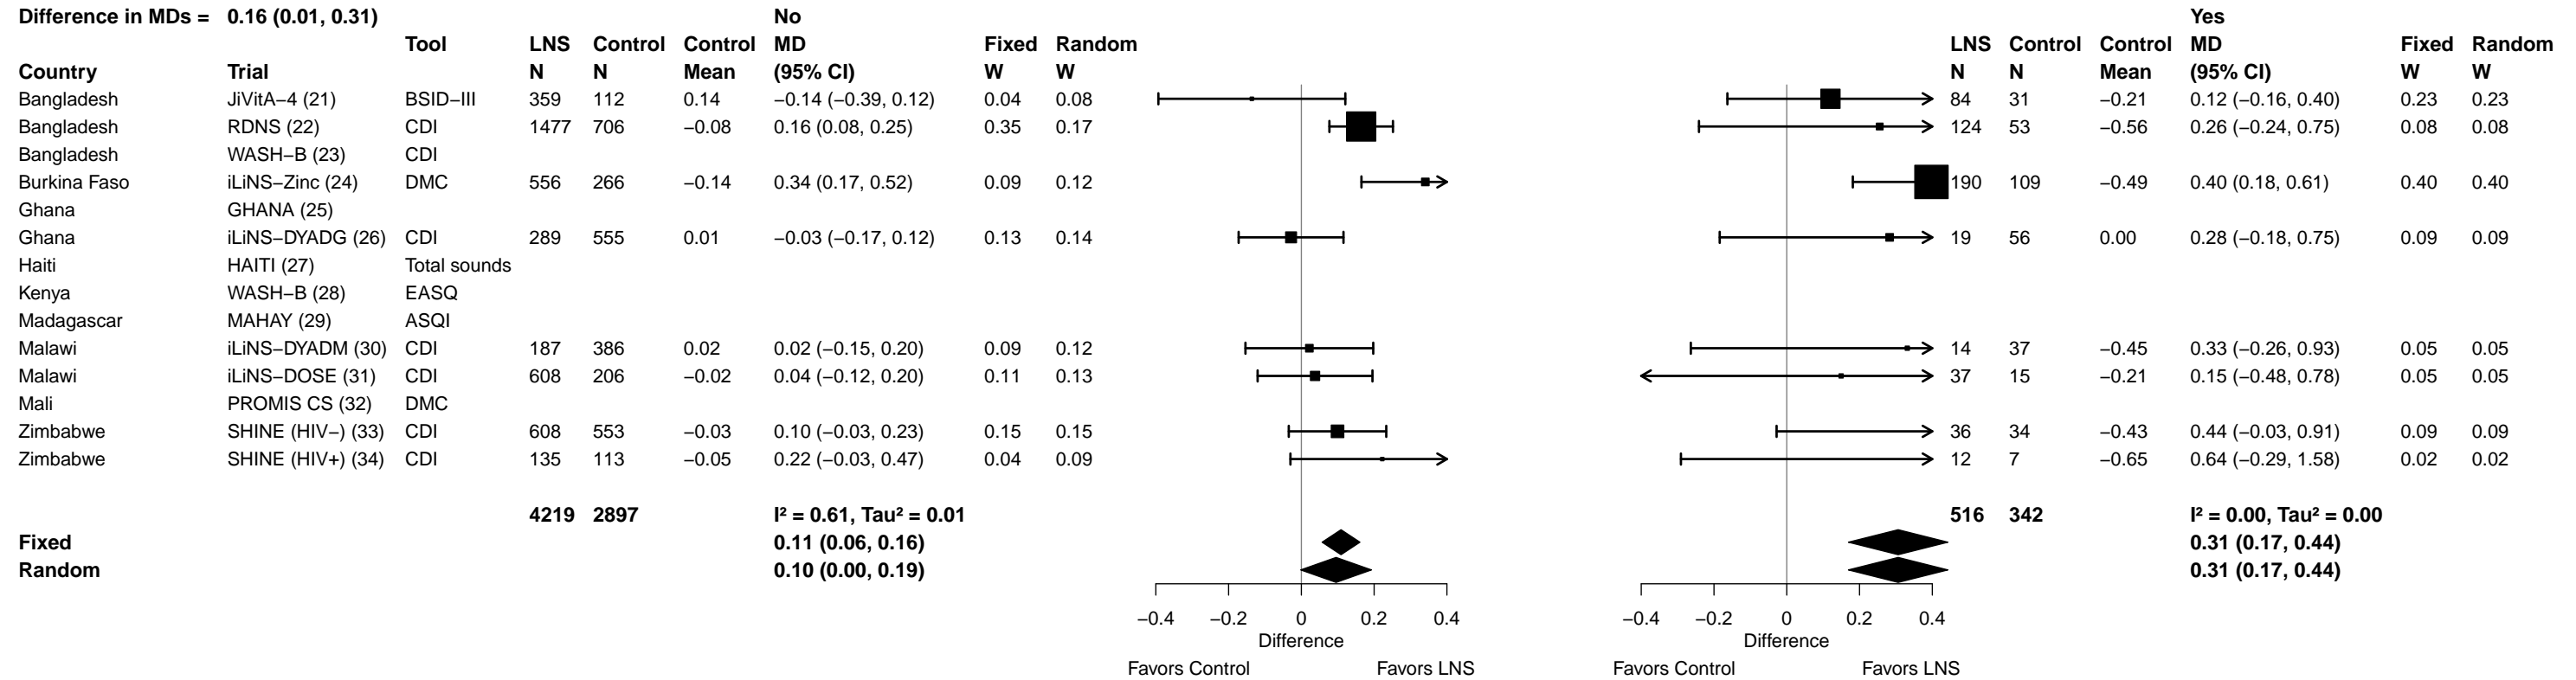

Supplemental figure 5A: Mean difference in language z-score

5A10: Stratified by Child baseline anemia

P-for-interaction = 0.650  
 Difference in MDs = -0.04 (-0.19, 0.12)

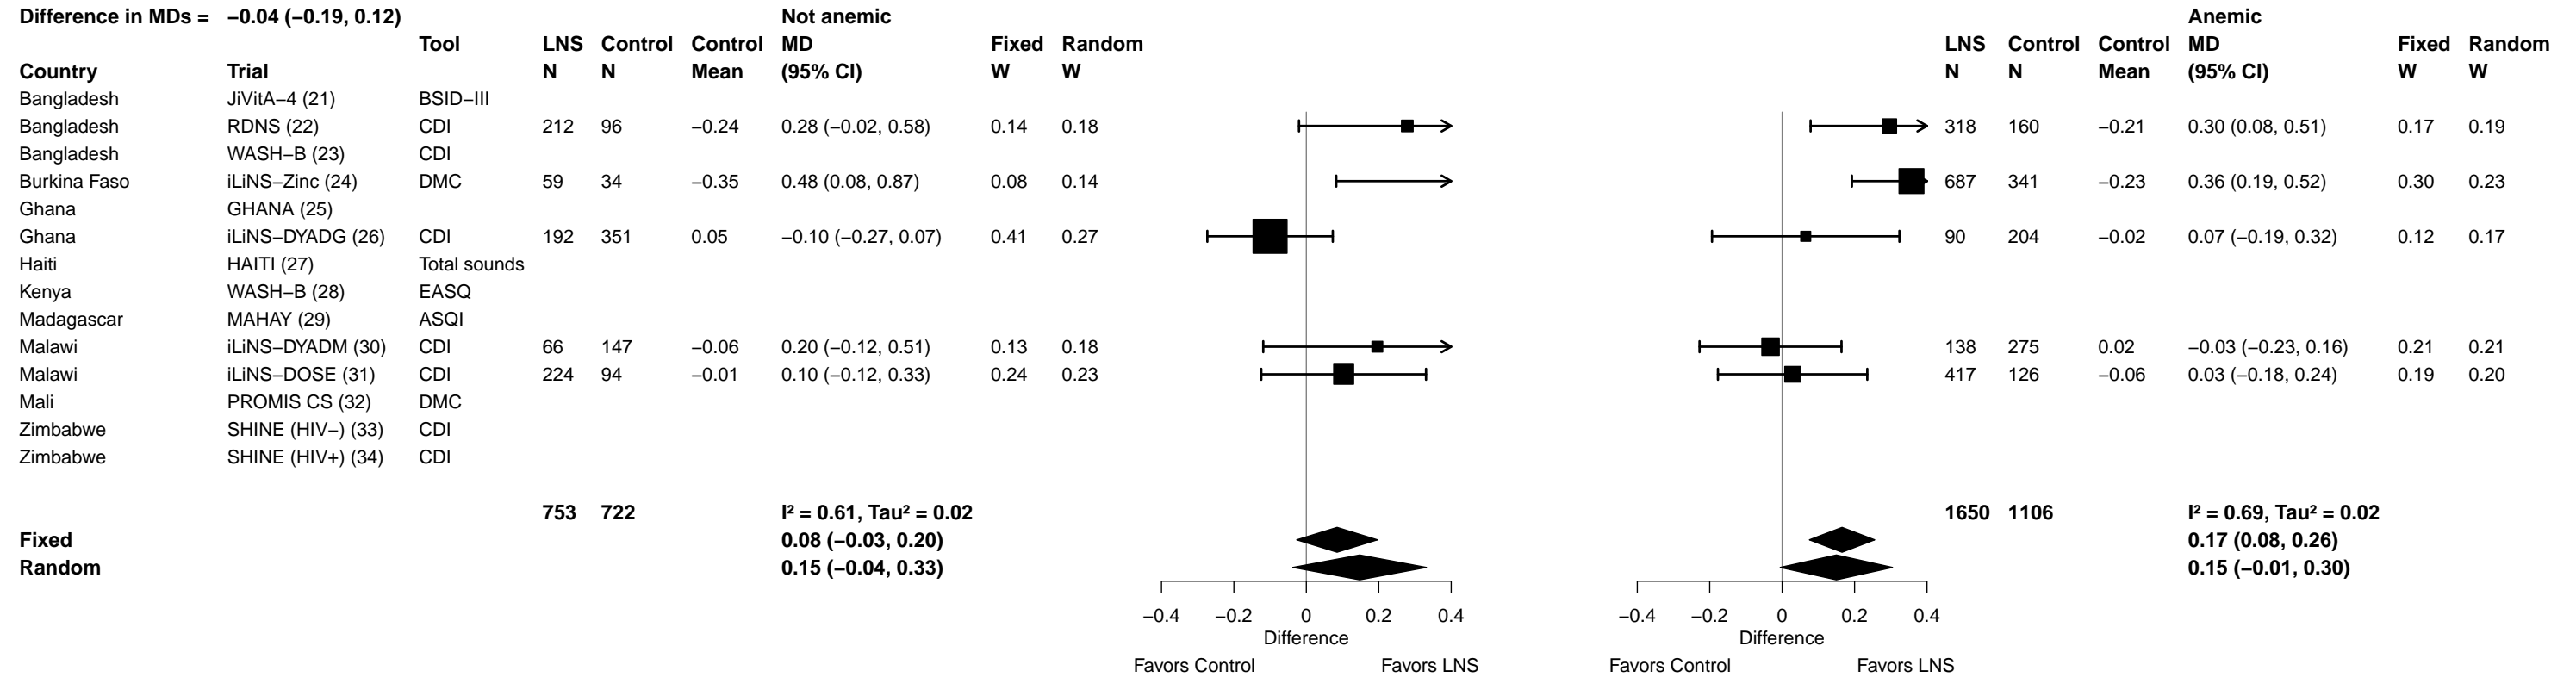

### Supplemental figure 5B: Language lowest decile prevalence ratio

#### 5B1: Stratified by Maternal height

P-for-interaction = 0.678

Ratio of PRs = 1.06 (0.81, 1.39)

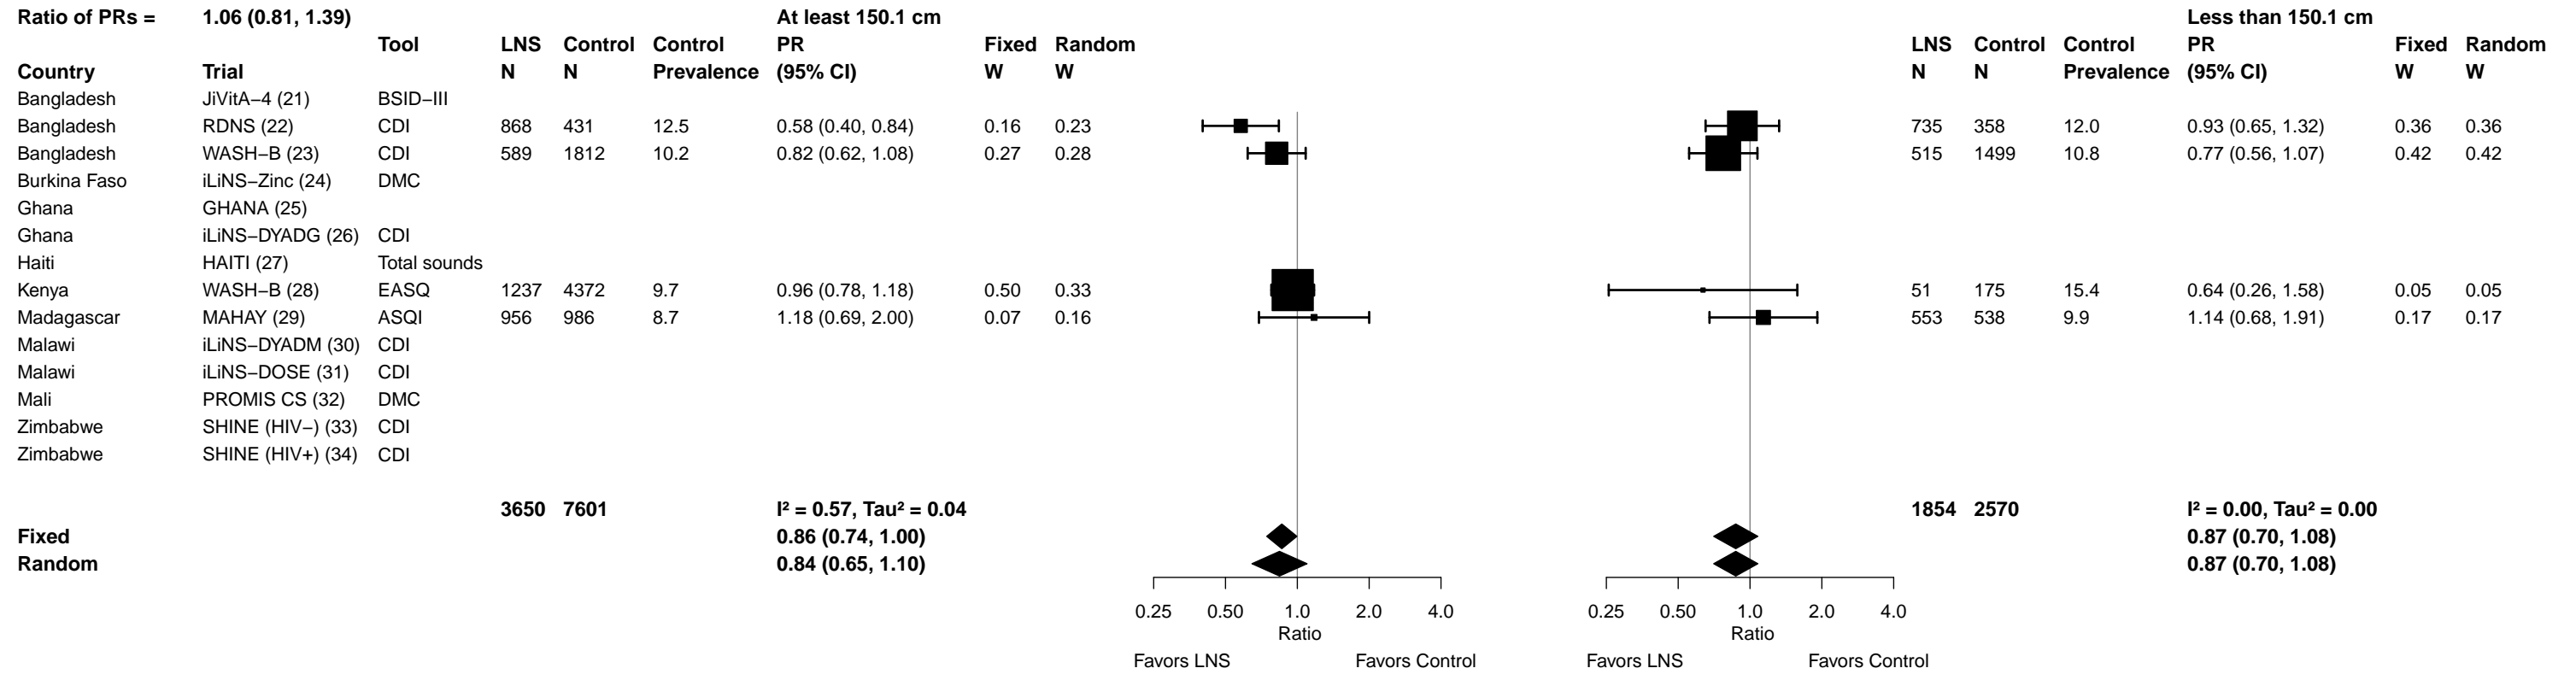

Supplemental figure 5B: Language lowest decile prevalence ratio

5B2: Stratified by Maternal BMI

P-for-interaction = 0.149

Ratio of PRs = 1.18 (0.94, 1.47)

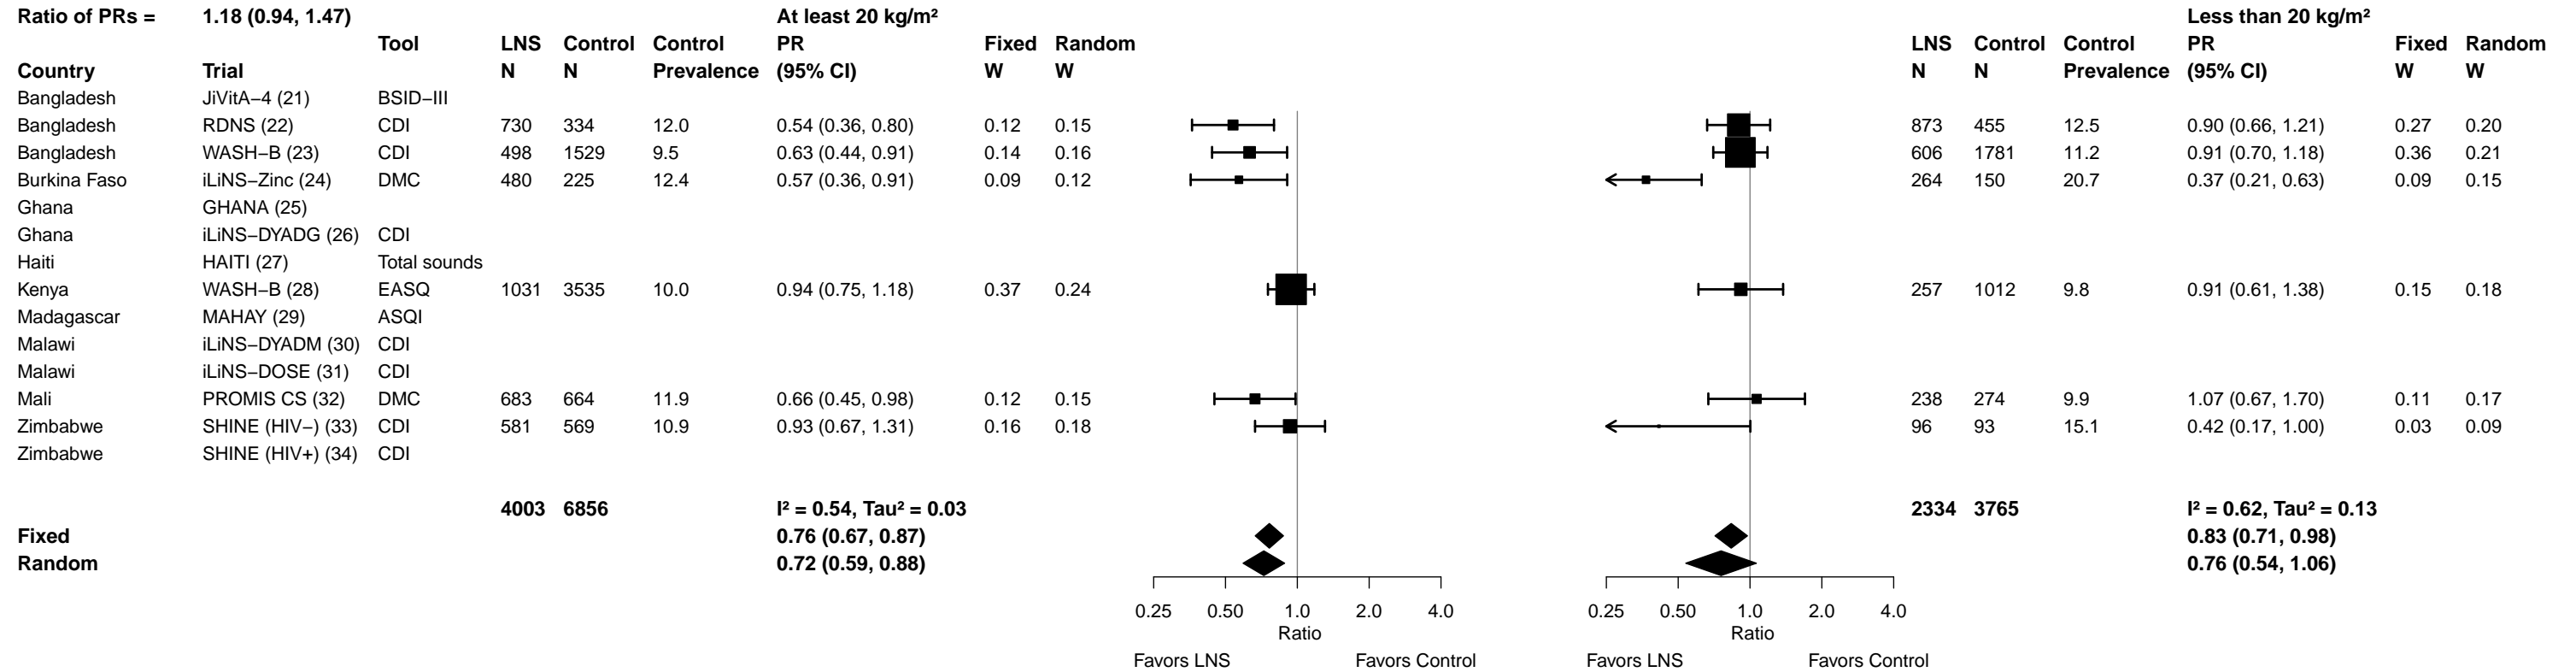

Supplemental figure 5B: Language lowest decile prevalence ratio

5B3: Stratified by Maternal age

P-for-interaction = 0.832

Ratio of PRs = 1.02 (0.86, 1.20)

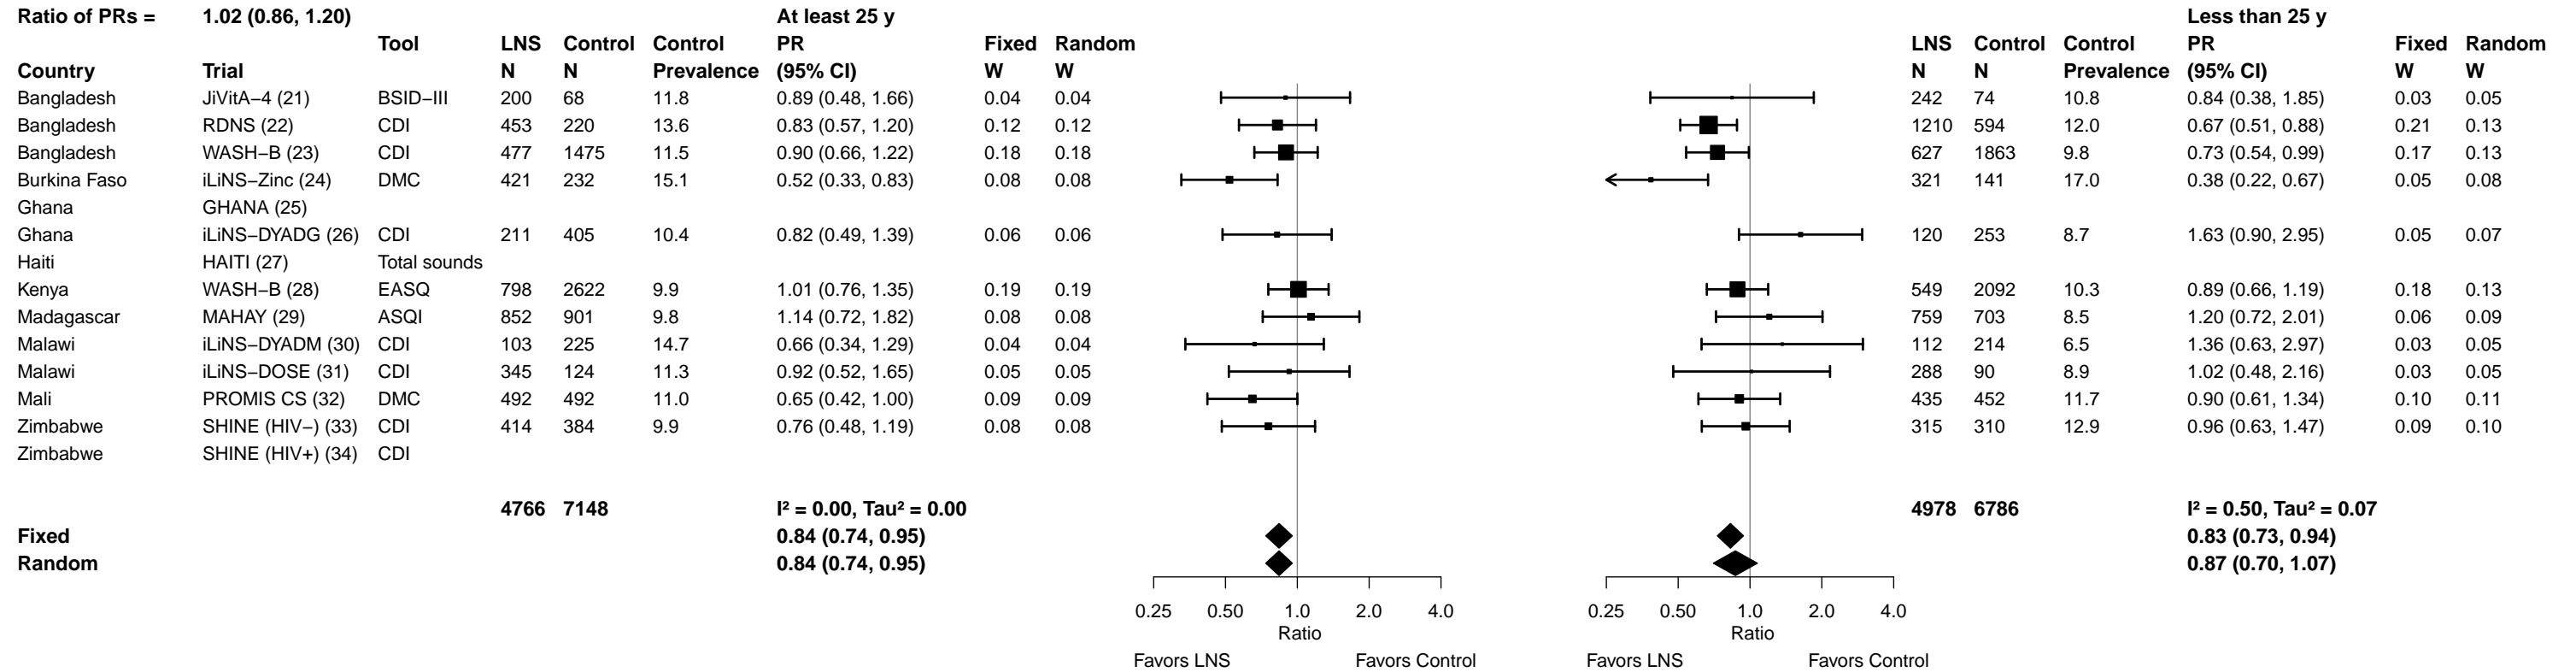

Supplemental figure 5B: Language lowest decile prevalence ratio

5B4: Stratified by Maternal education

P-for-interaction = 0.804  
 Ratio of PRs = 0.97 (0.79, 1.20)

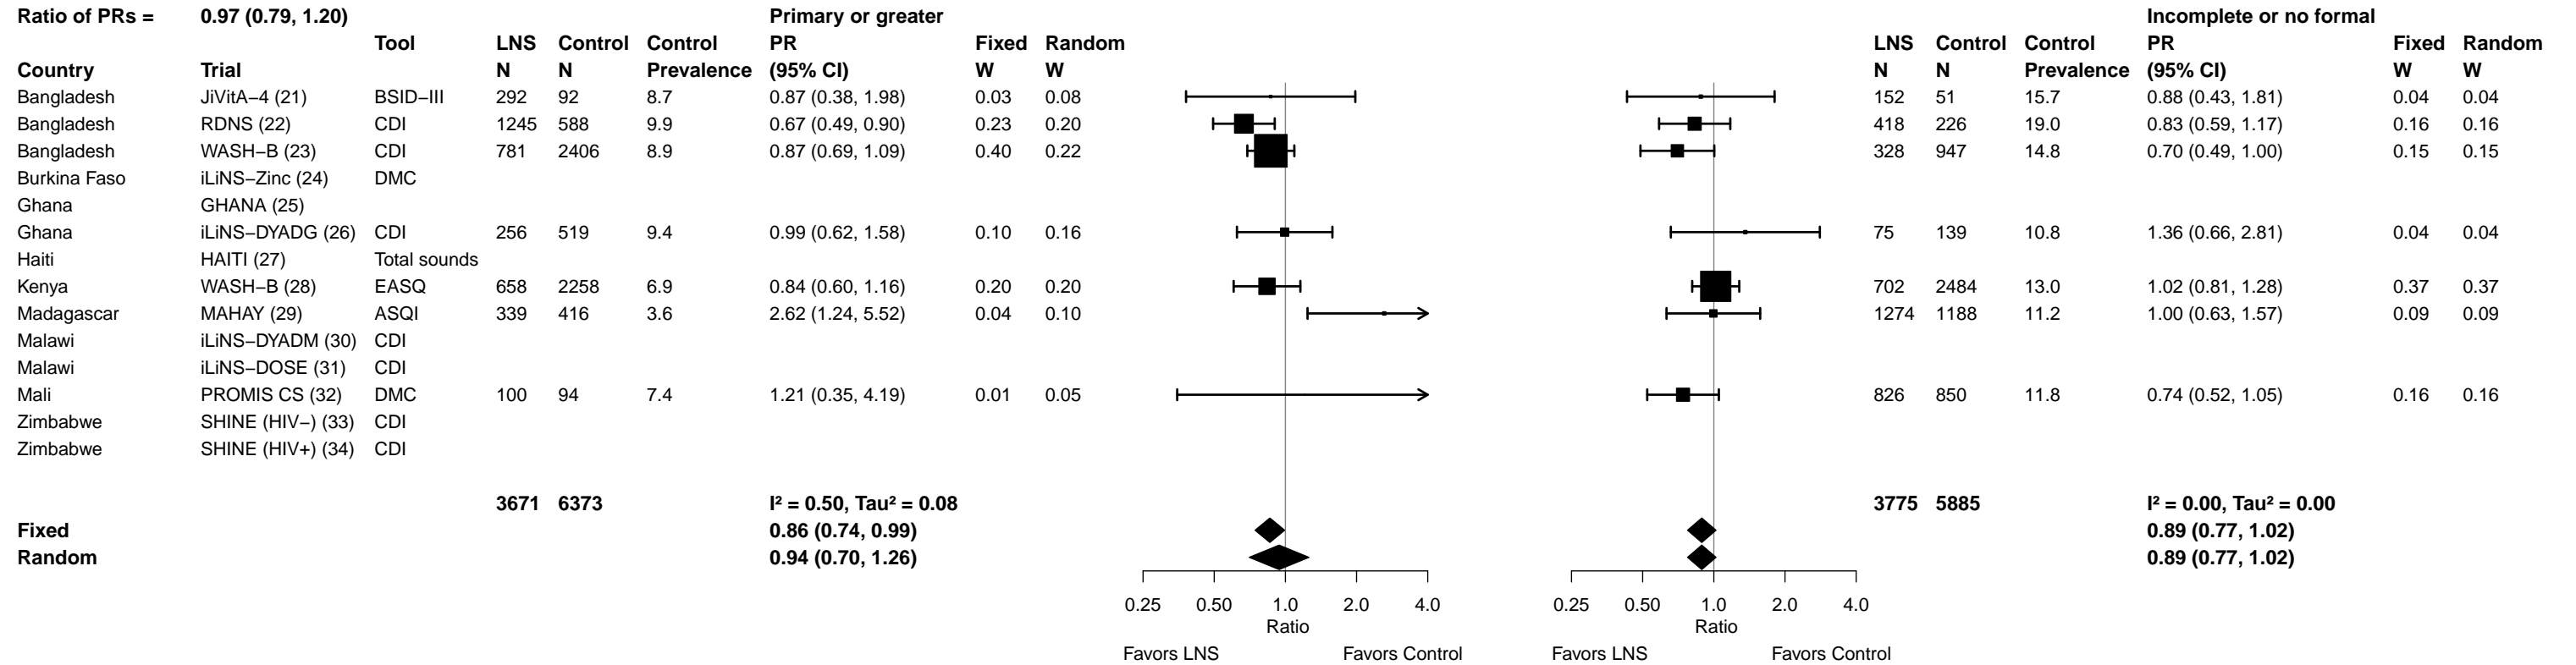

Supplemental figure 5B: Language lowest decile prevalence ratio

5B5: Stratified by Maternal depressive symptoms

P-for-interaction = 0.204

Ratio of PRs = 0.86 (0.69, 1.08)

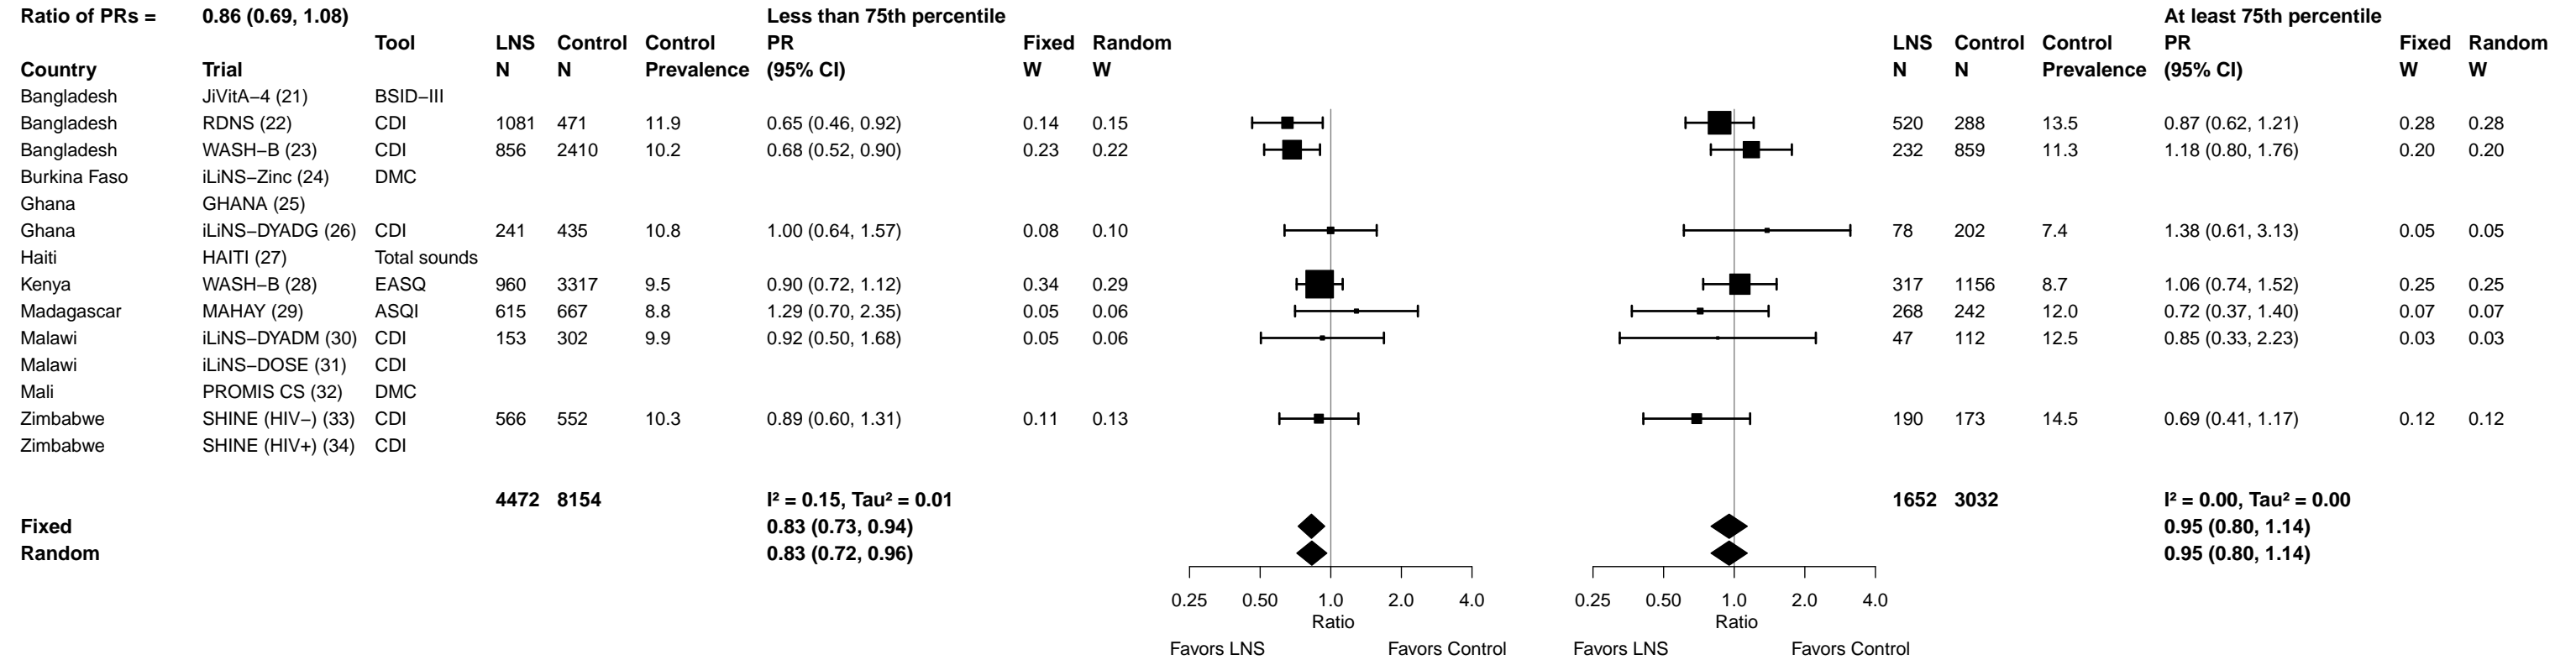



Supplemental figure 5B: Language lowest decile prevalence ratio

5B6: Stratified by Child sex

P-for-interaction = 0.255

Ratio of PRs = 0.91 (0.77, 1.07)

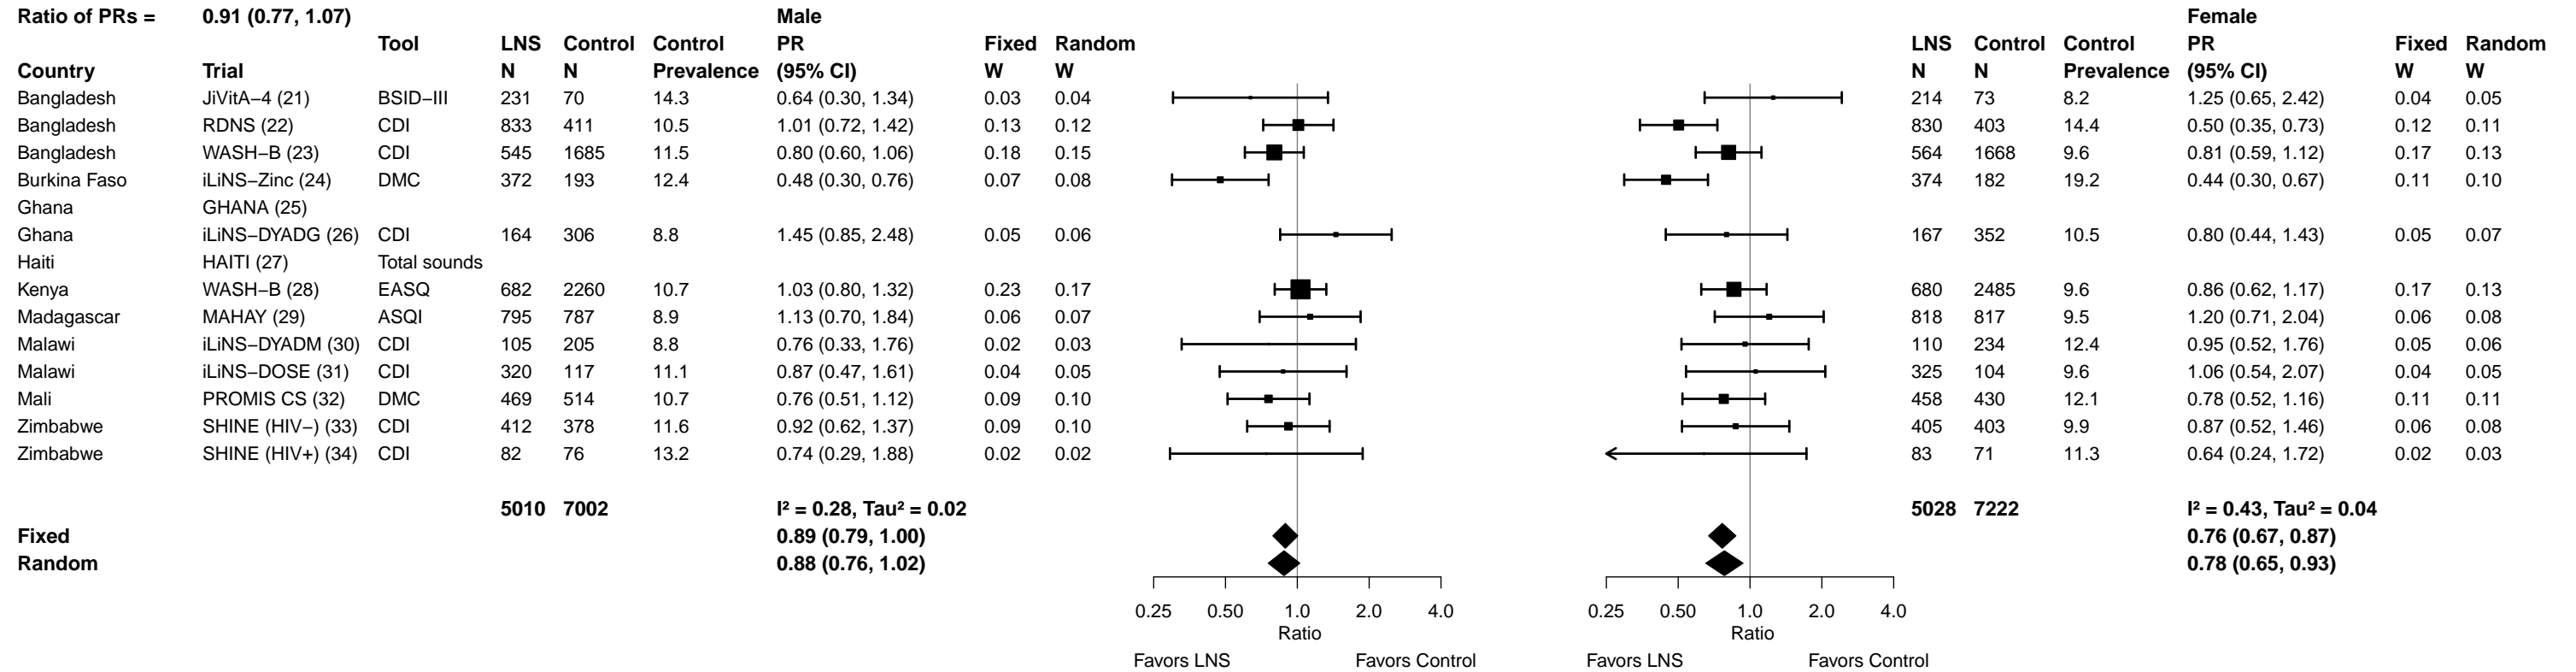

Supplemental figure 5B: Language lowest decile prevalence ratio

5B7: Stratified by Child birth order

P-for-interaction = 0.362

Ratio of PRs = 1.10 (0.90, 1.35)

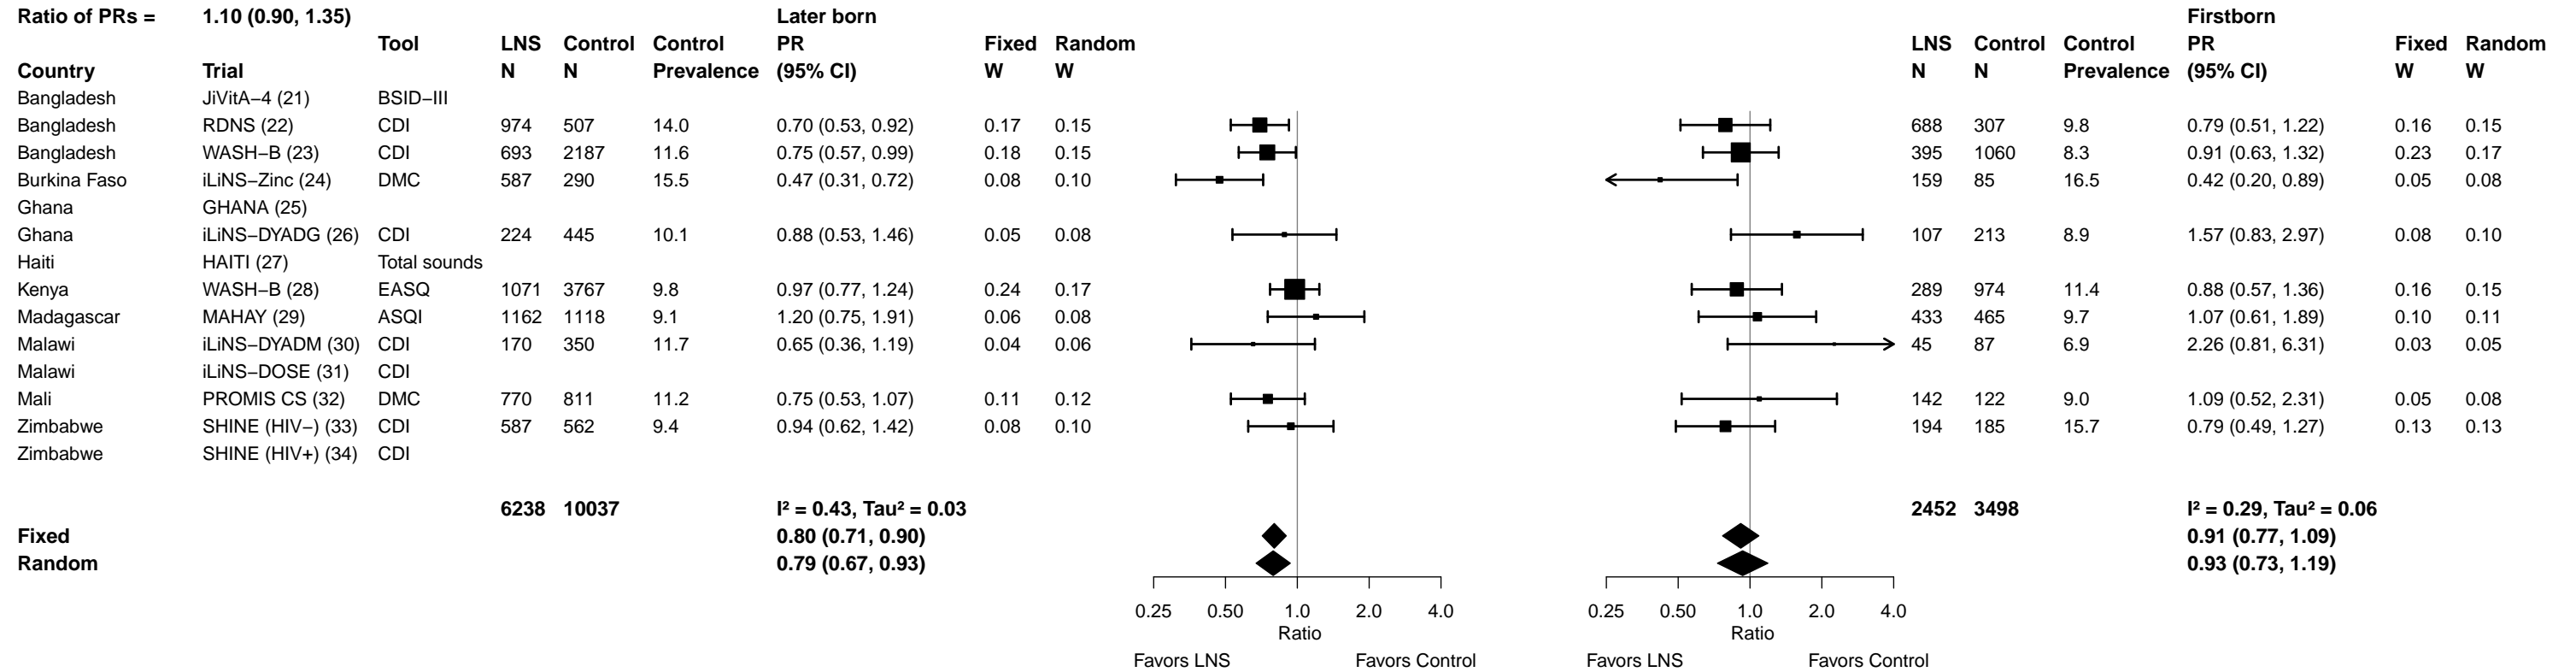

Supplemental figure 5B: Language lowest decile prevalence ratio

5B8: Stratified by Child baseline stunting

P-for-interaction = 0.111

Ratio of PRs = 0.79 (0.59, 1.06)

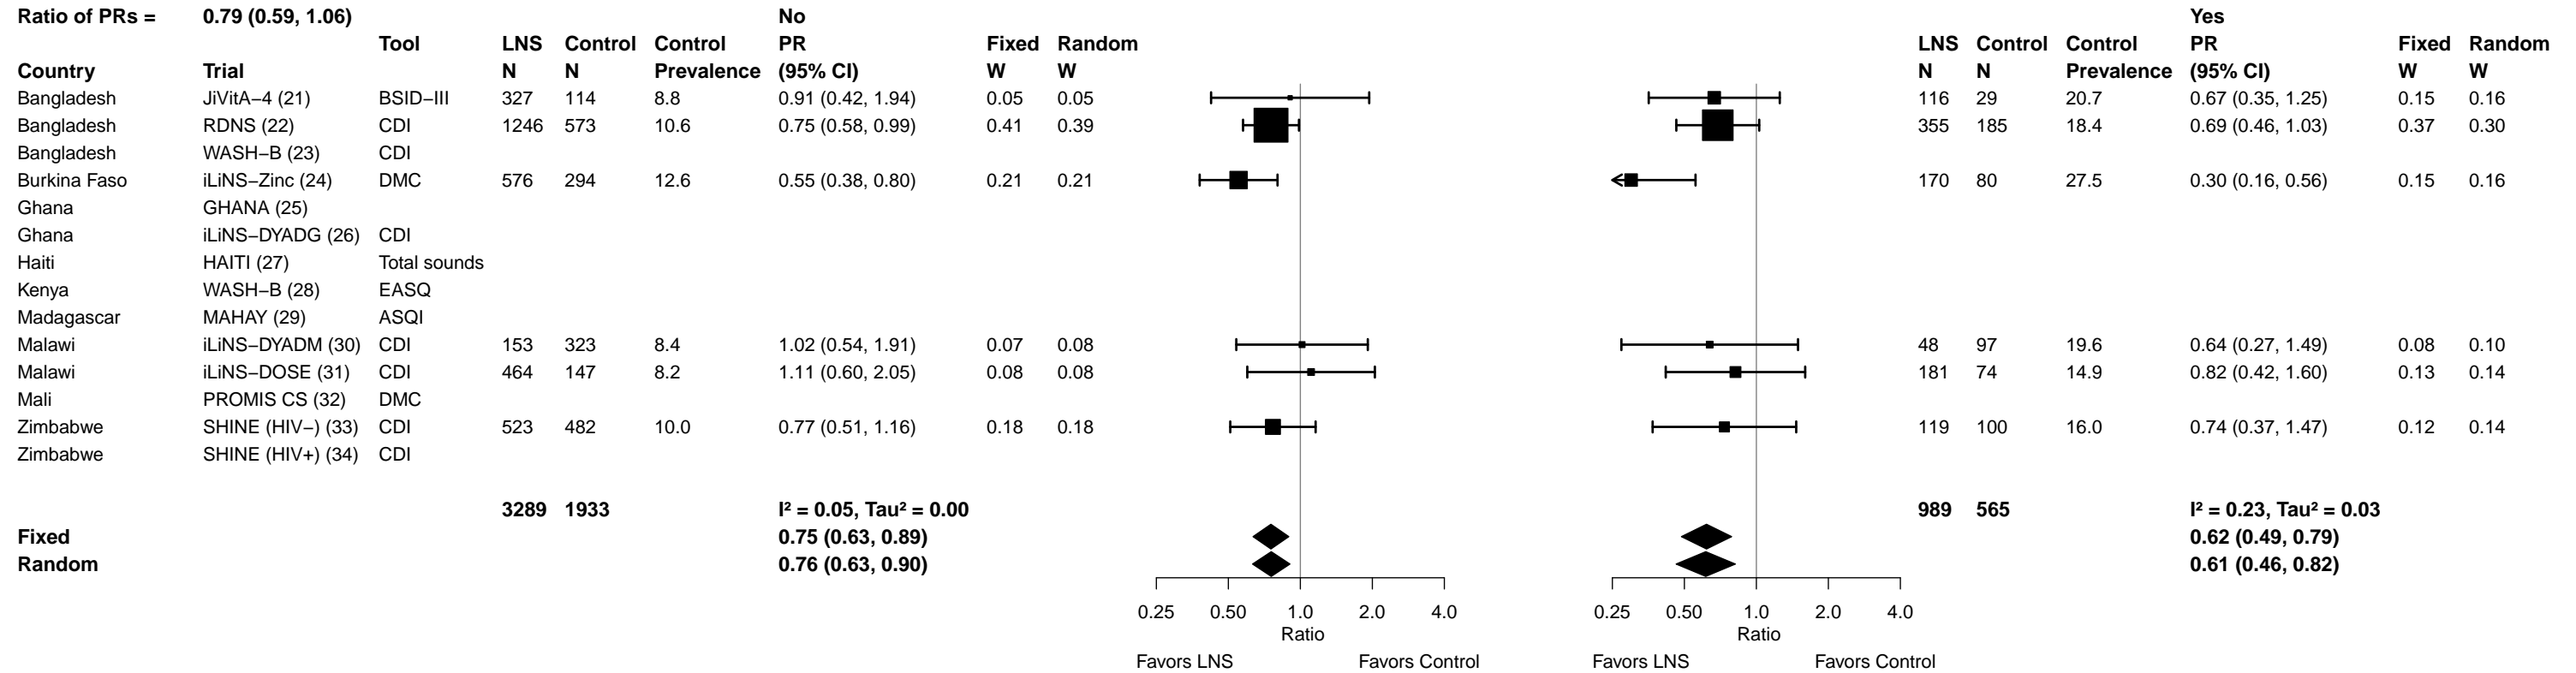

Supplemental figure 5B: Language lowest decile prevalence ratio

5B9: Stratified by Child baseline acute malnutrition

P-for-interaction = 0.588

Ratio of PRs = 1.13 (0.73, 1.76)

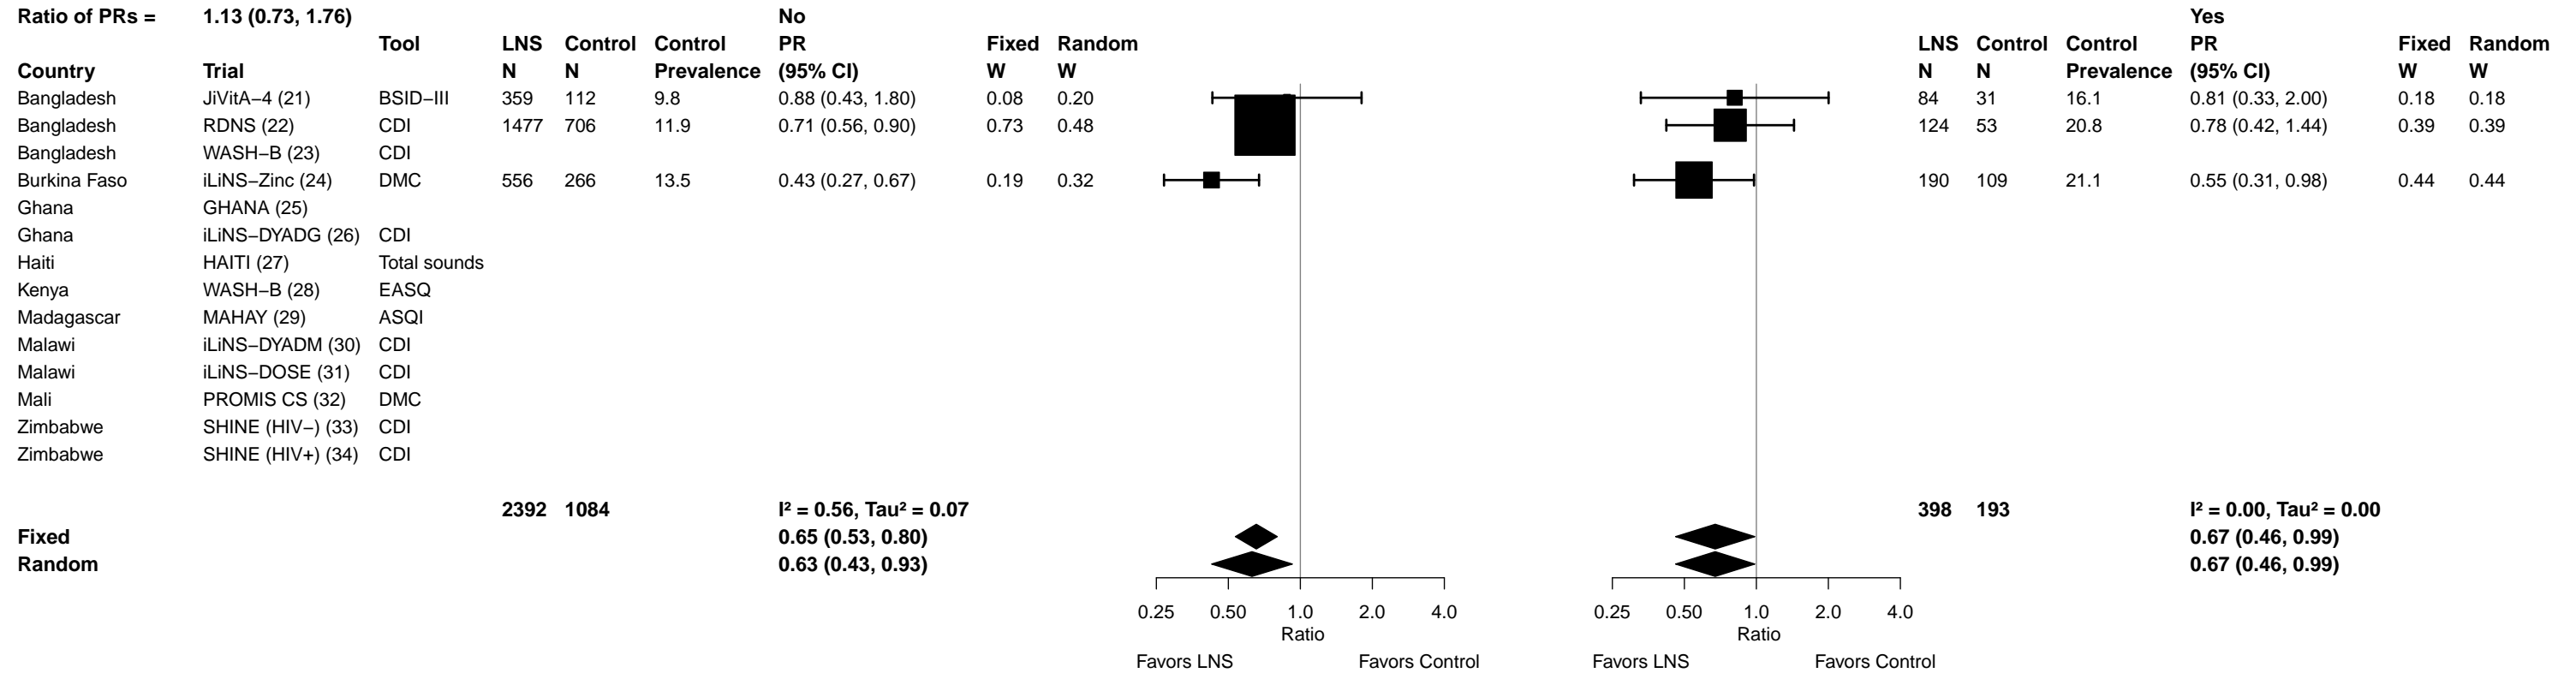

Supplemental figure 5B: Language lowest decile prevalence ratio

5B10: Stratified by Child baseline anemia

P-for-interaction = 0.847

Ratio of PRs = 1.05 (0.65, 1.68)

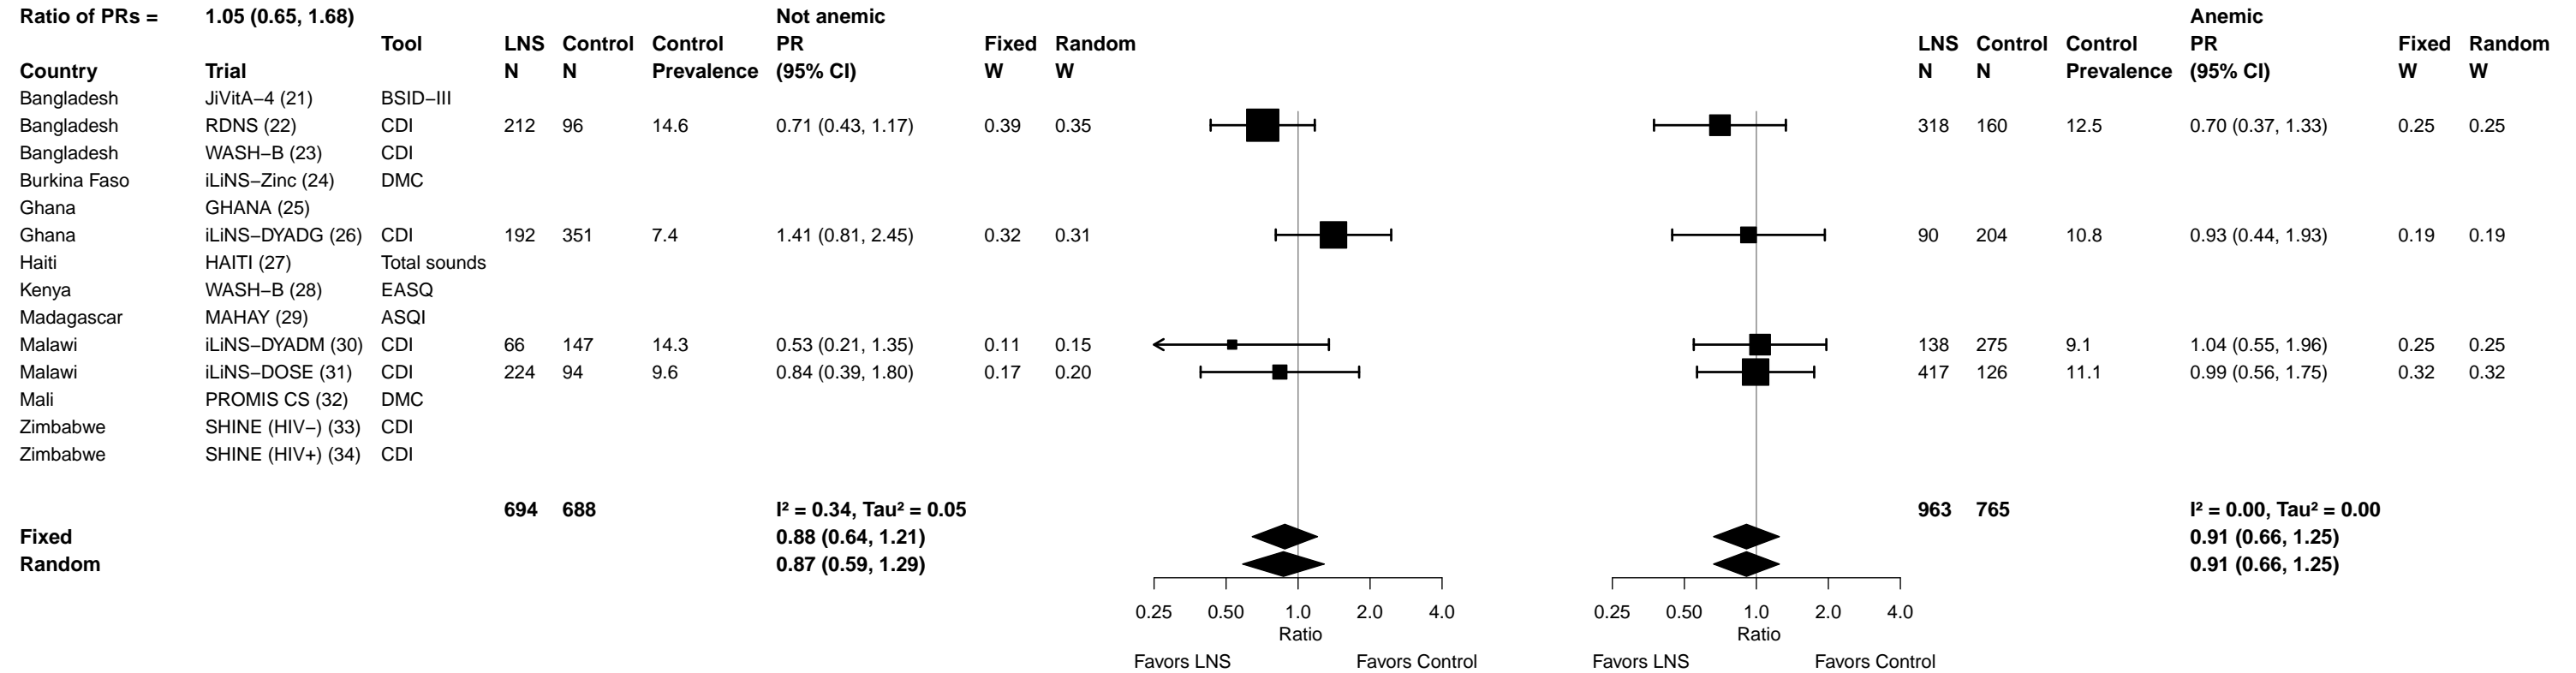

### Supplemental figure 5C: Language lowest decile prevalence difference

#### 5C1: Stratified by Maternal height

**P-for-interaction = 0.813**  
**Difference in PDs = 0.00 (-0.02, 0.03)**

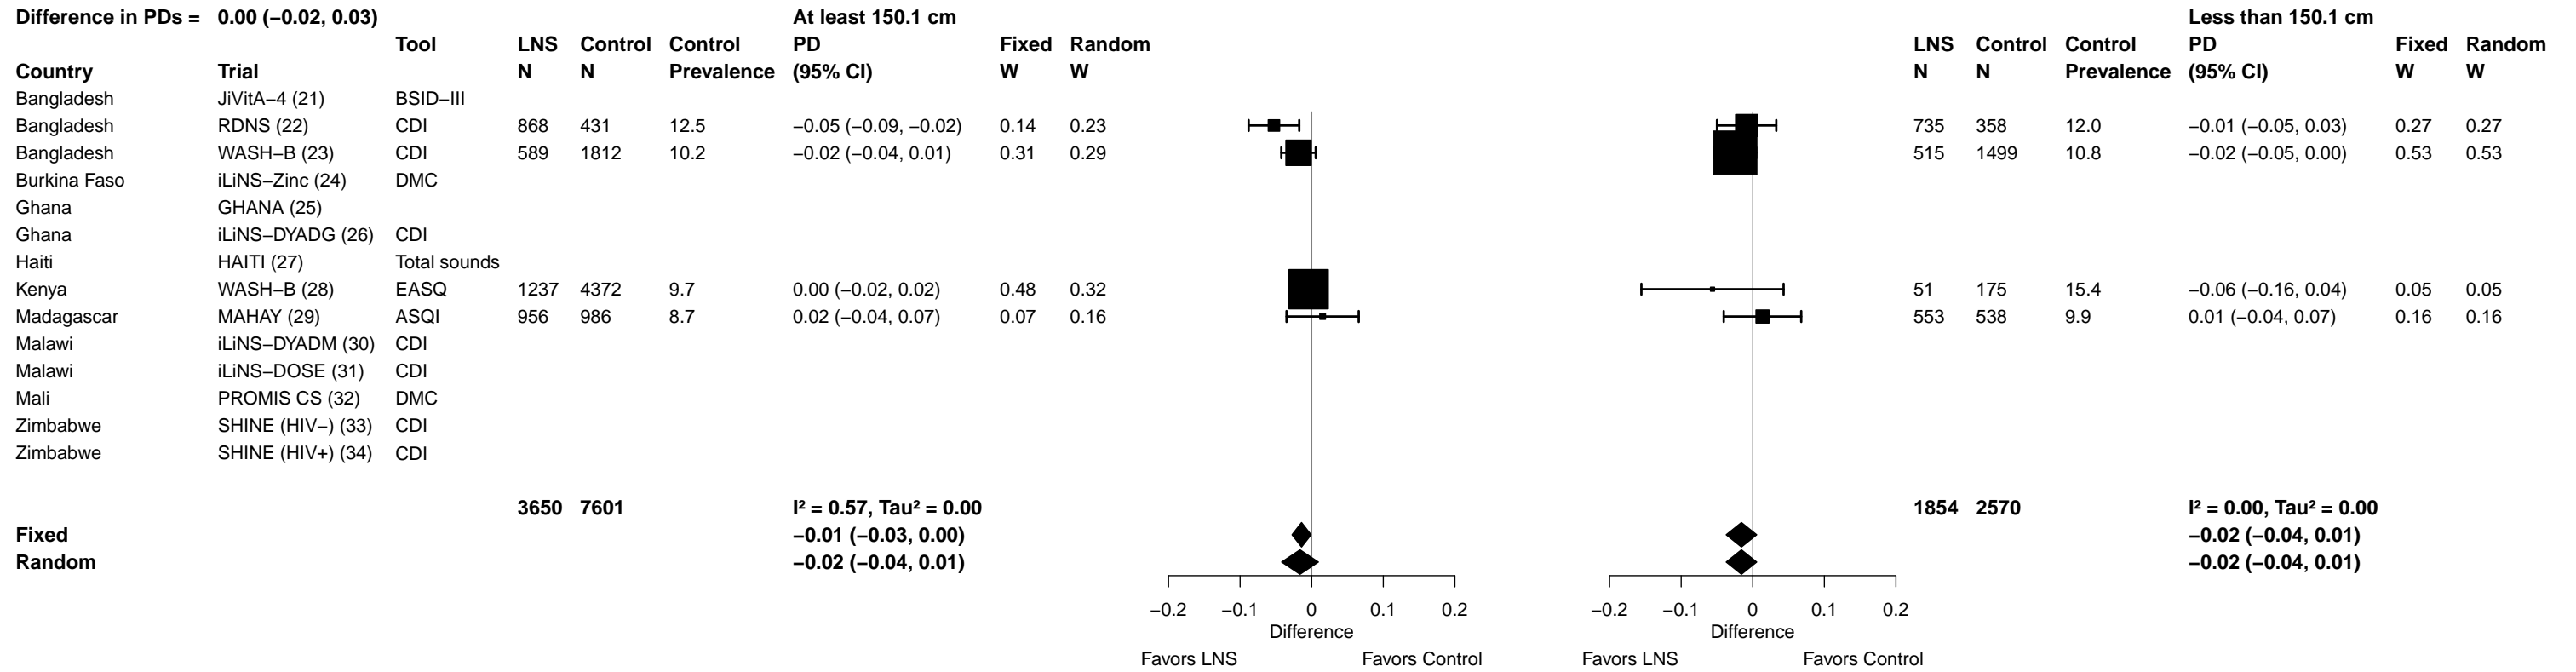

Supplemental figure 5C: Language lowest decile prevalence difference

5C2: Stratified by Maternal BMI

P-for-interaction = 0.303  
 Difference in PDs = 0.01 (-0.01, 0.03)

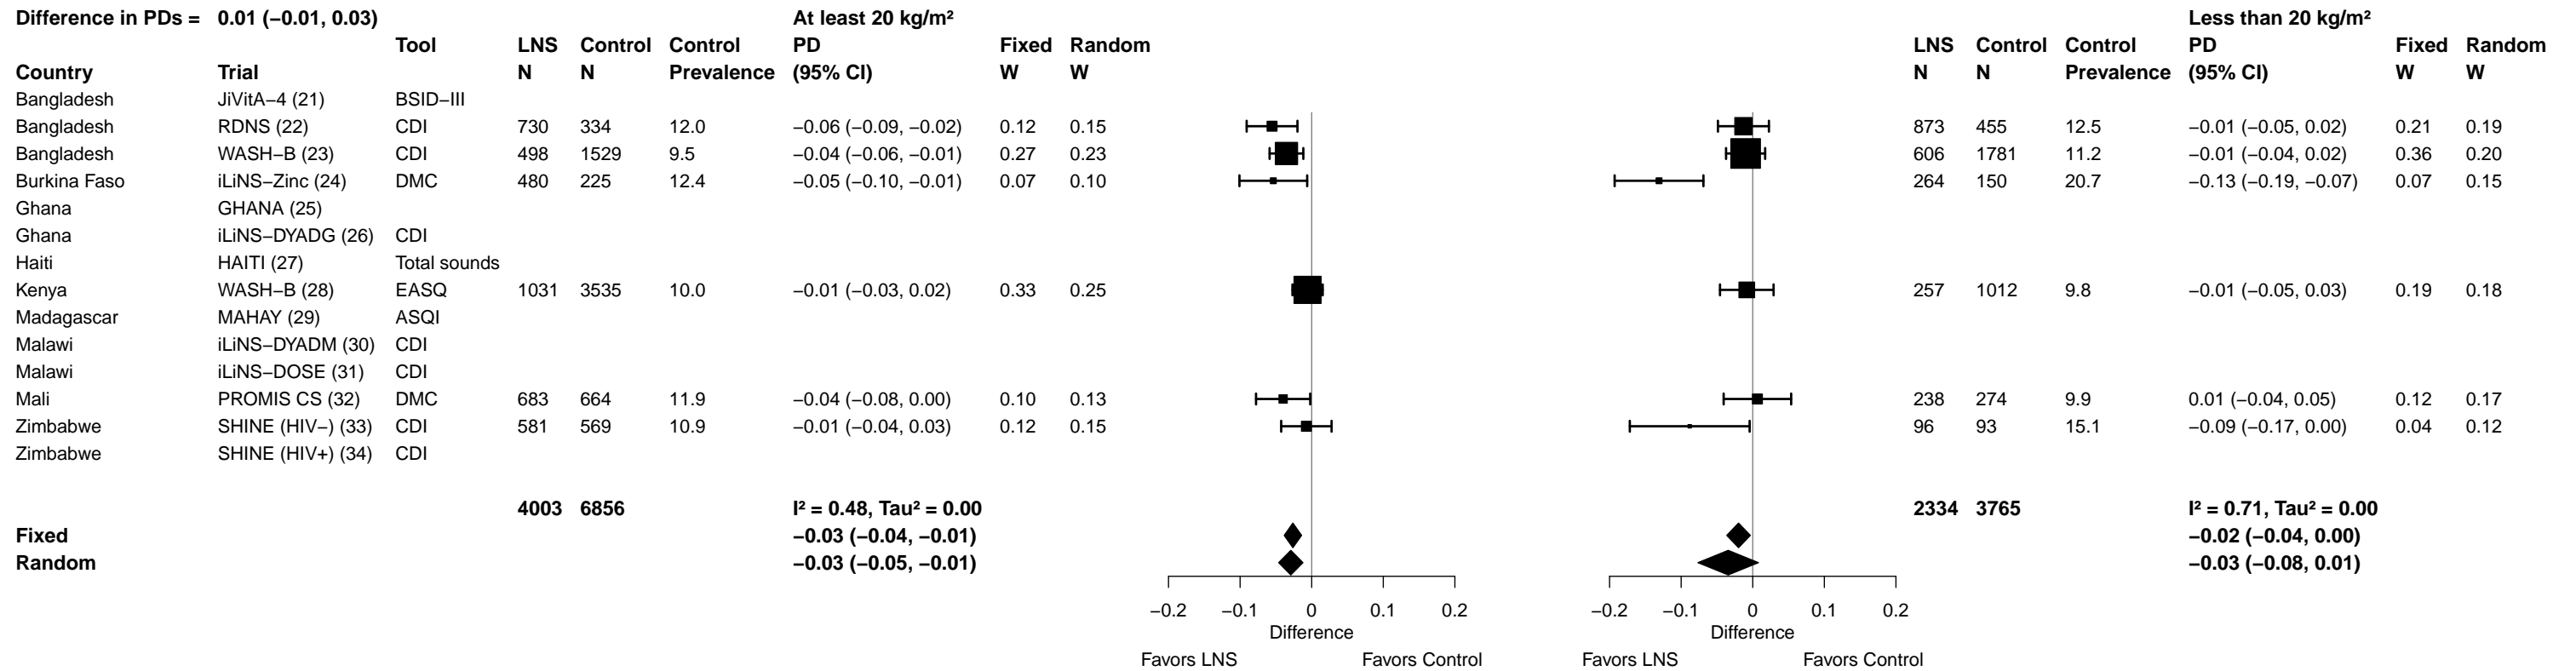

Supplemental figure 5C: Language lowest decile prevalence difference

5C3: Stratified by Maternal age

P-for-interaction = 0.820  
 Difference in PDs = 0.00 (-0.02, 0.02)

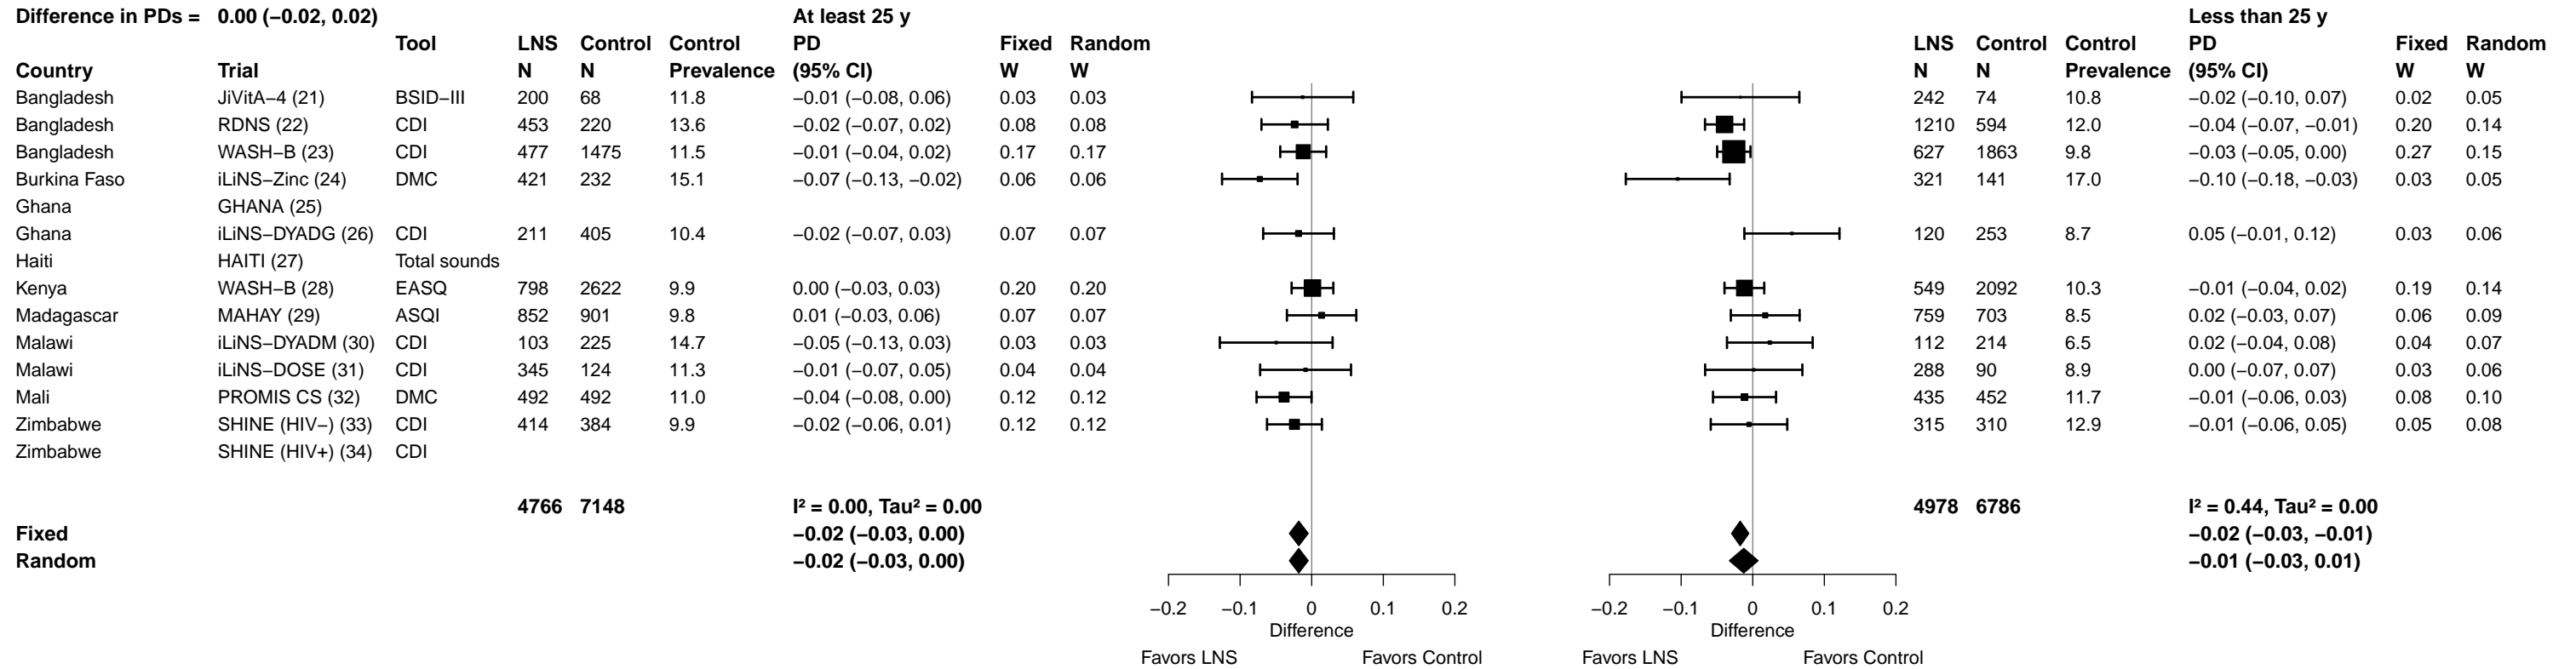



Supplemental figure 5C: Language lowest decile prevalence difference

5C4: Stratified by Maternal education

**P-for-interaction = 0.116**  
**Difference in PDs = -0.02 (-0.04, 0.00)**

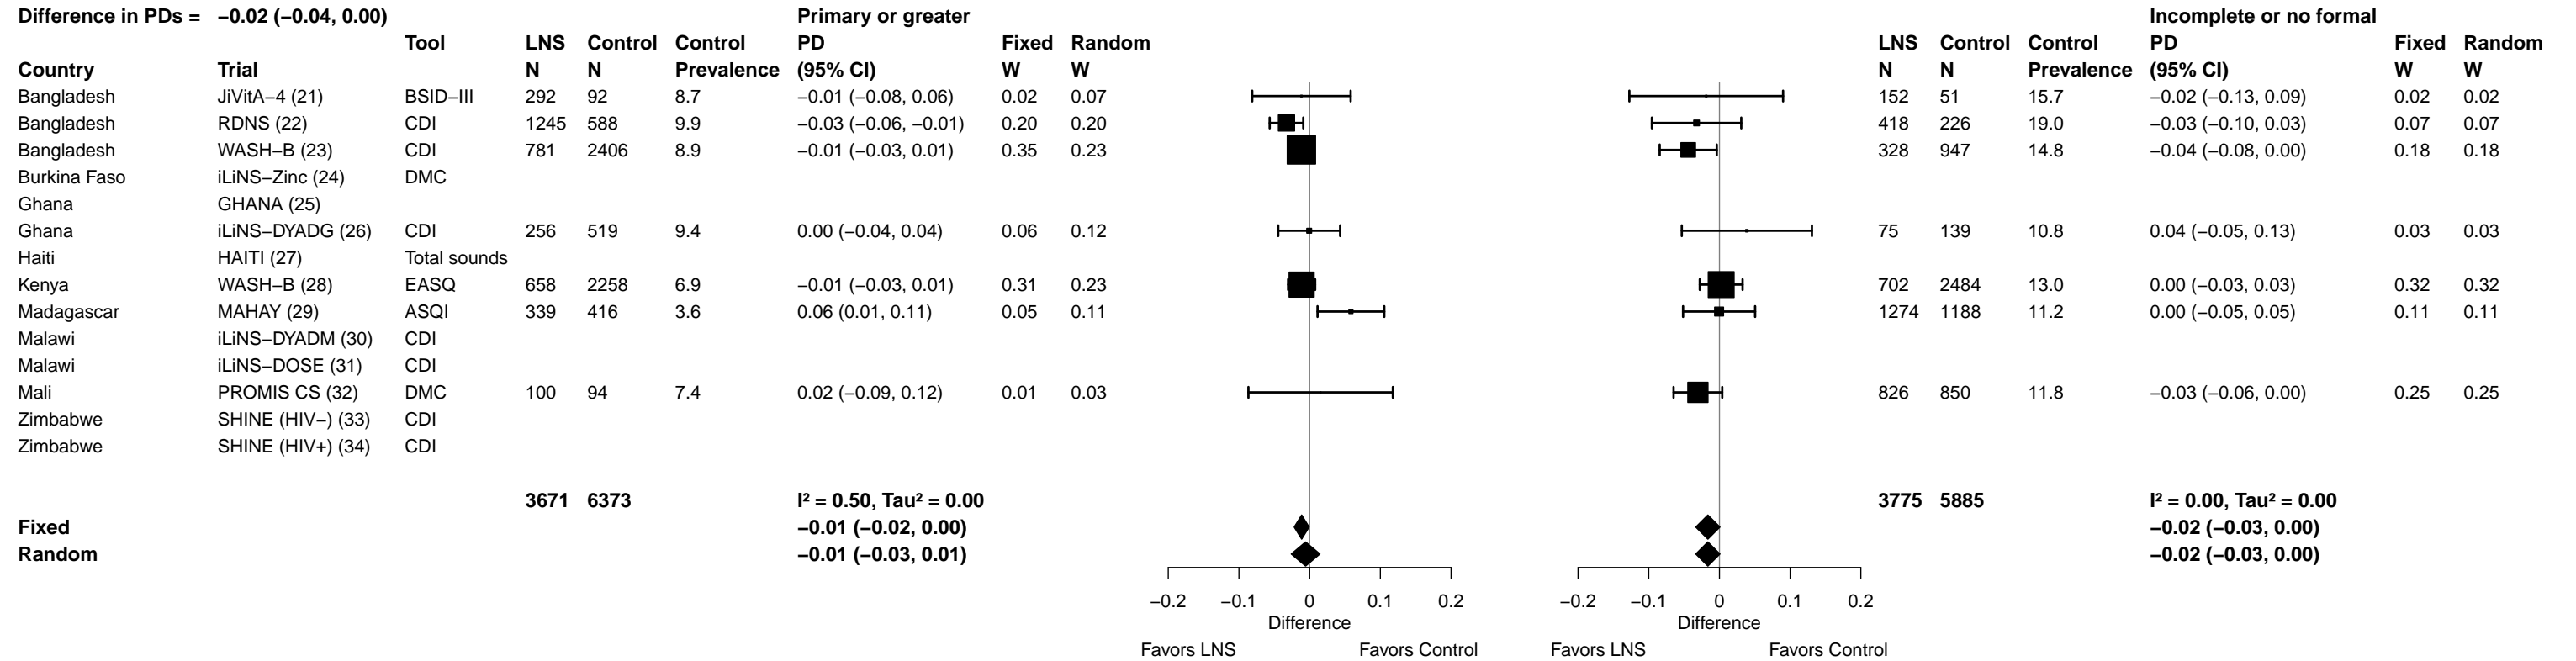

Supplemental figure 5C: Language lowest decile prevalence difference

5C5: Stratified by Maternal depressive symptoms

-for-interaction = 0.461  
 Difference in PDs = -0.01 (-0.03, 0.01)

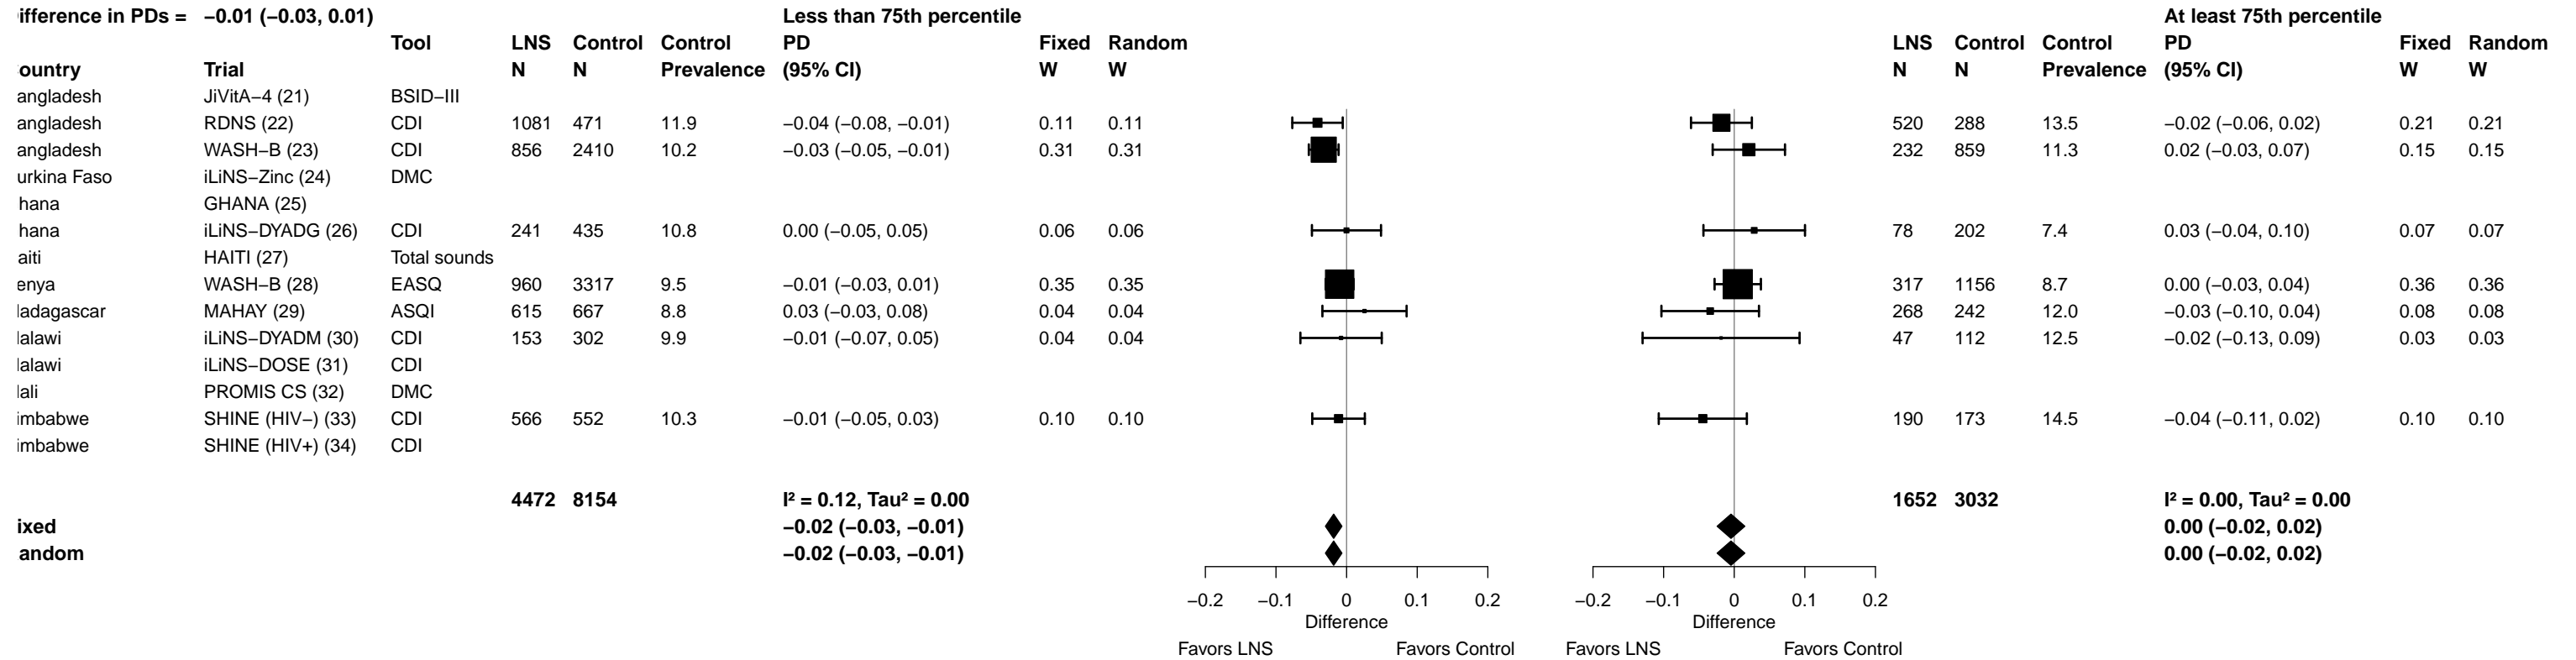

Supplemental figure 5C: Language lowest decile prevalence difference

5C6: Stratified by Child sex

P-for-interaction = 0.199

Difference in PDs = -0.01 (-0.03, 0.01)

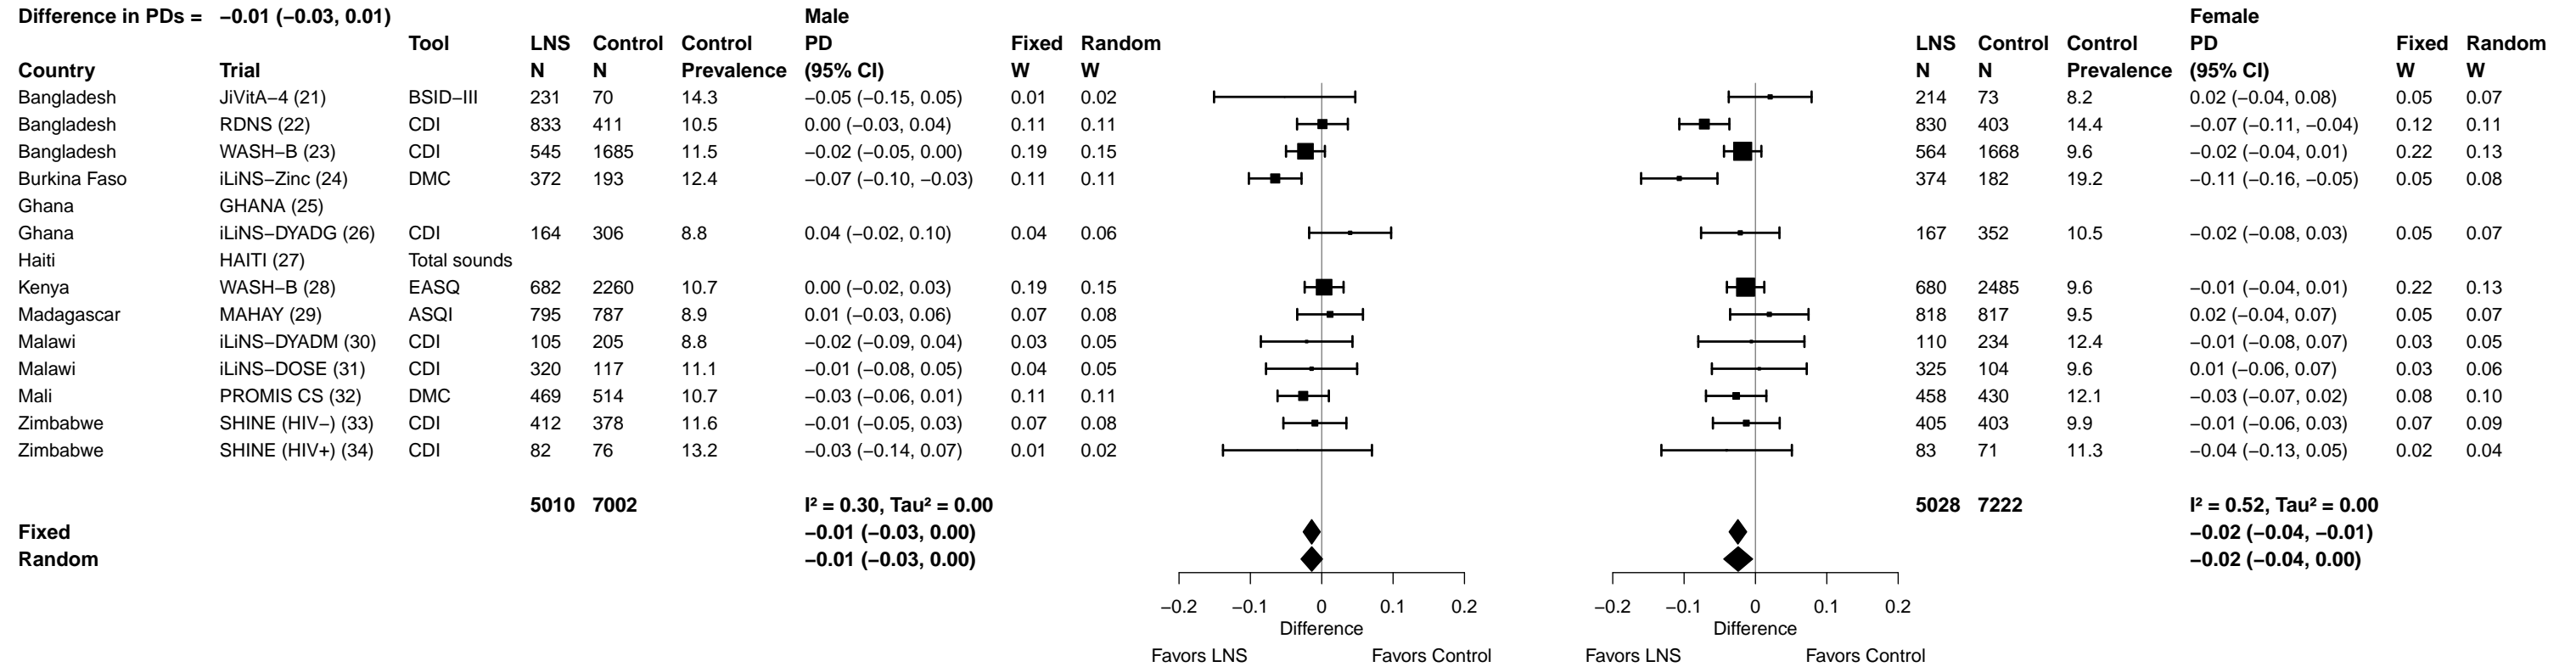

Supplemental figure 5C: Language lowest decile prevalence difference

5C7: Stratified by Child birth order

P-for-interaction = 0.300  
 Difference in PDs = 0.01 (-0.01, 0.03)

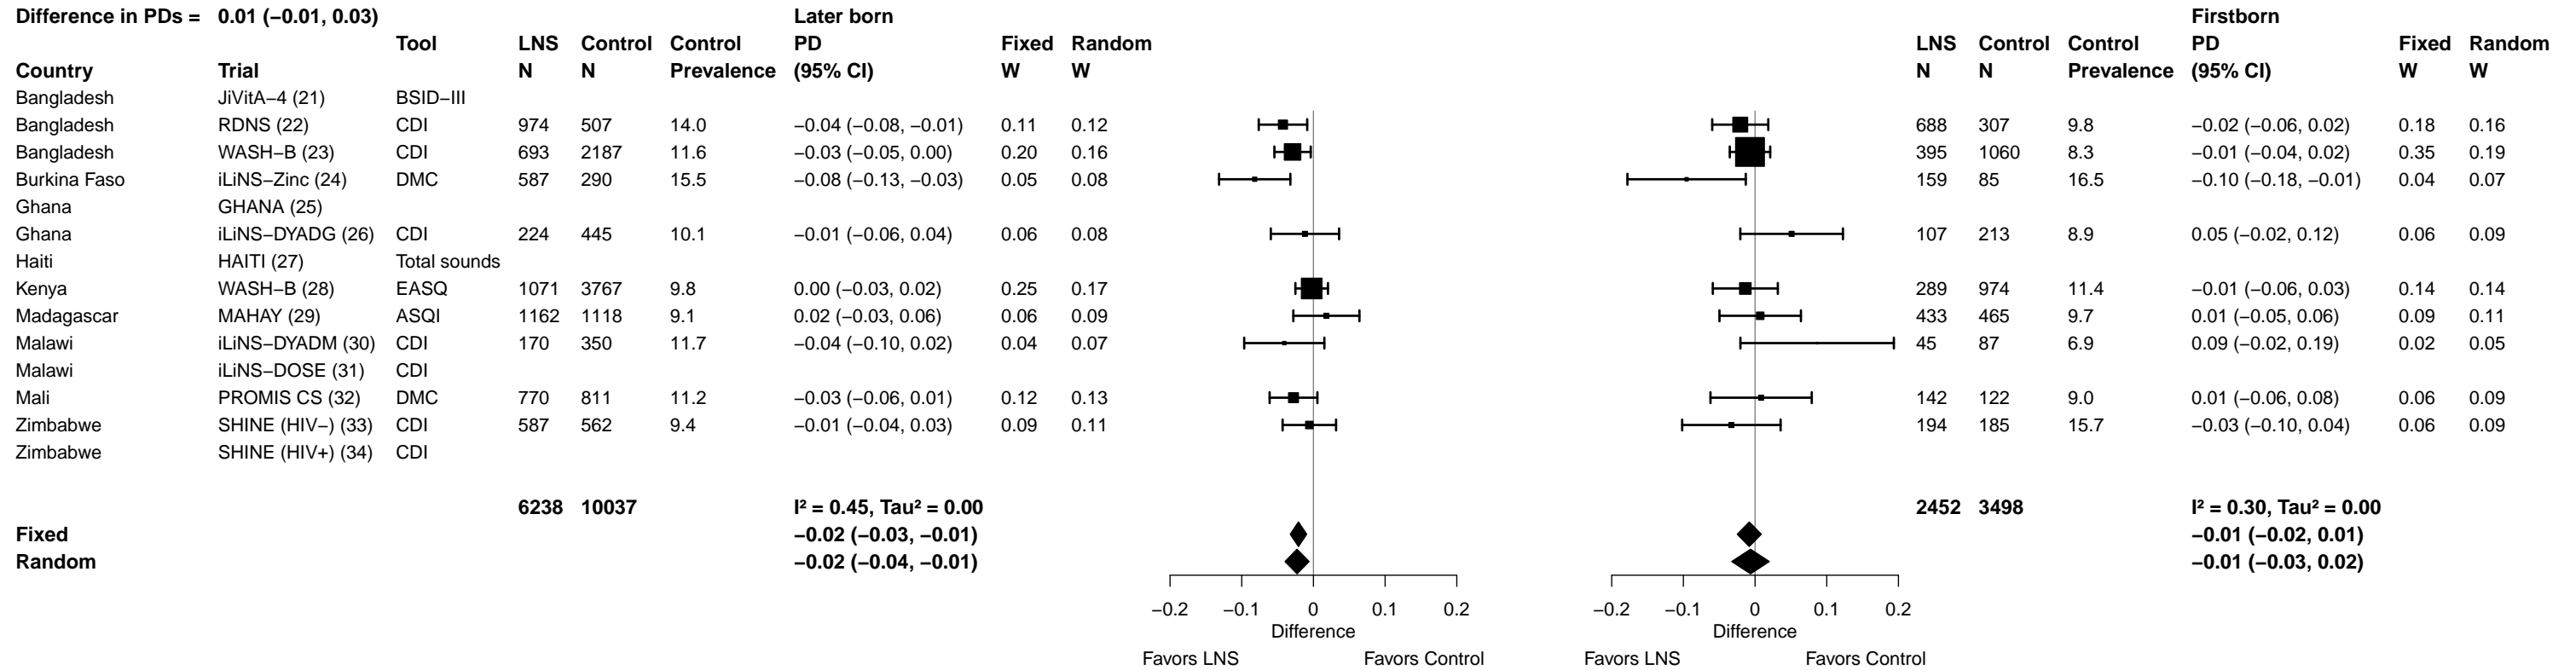

Supplemental figure 5C: Language lowest decile prevalence difference

5C8: Stratified by Child baseline stunting

P-for-interaction = 0.021

Difference in PDs = -0.05 (-0.09, -0.01)

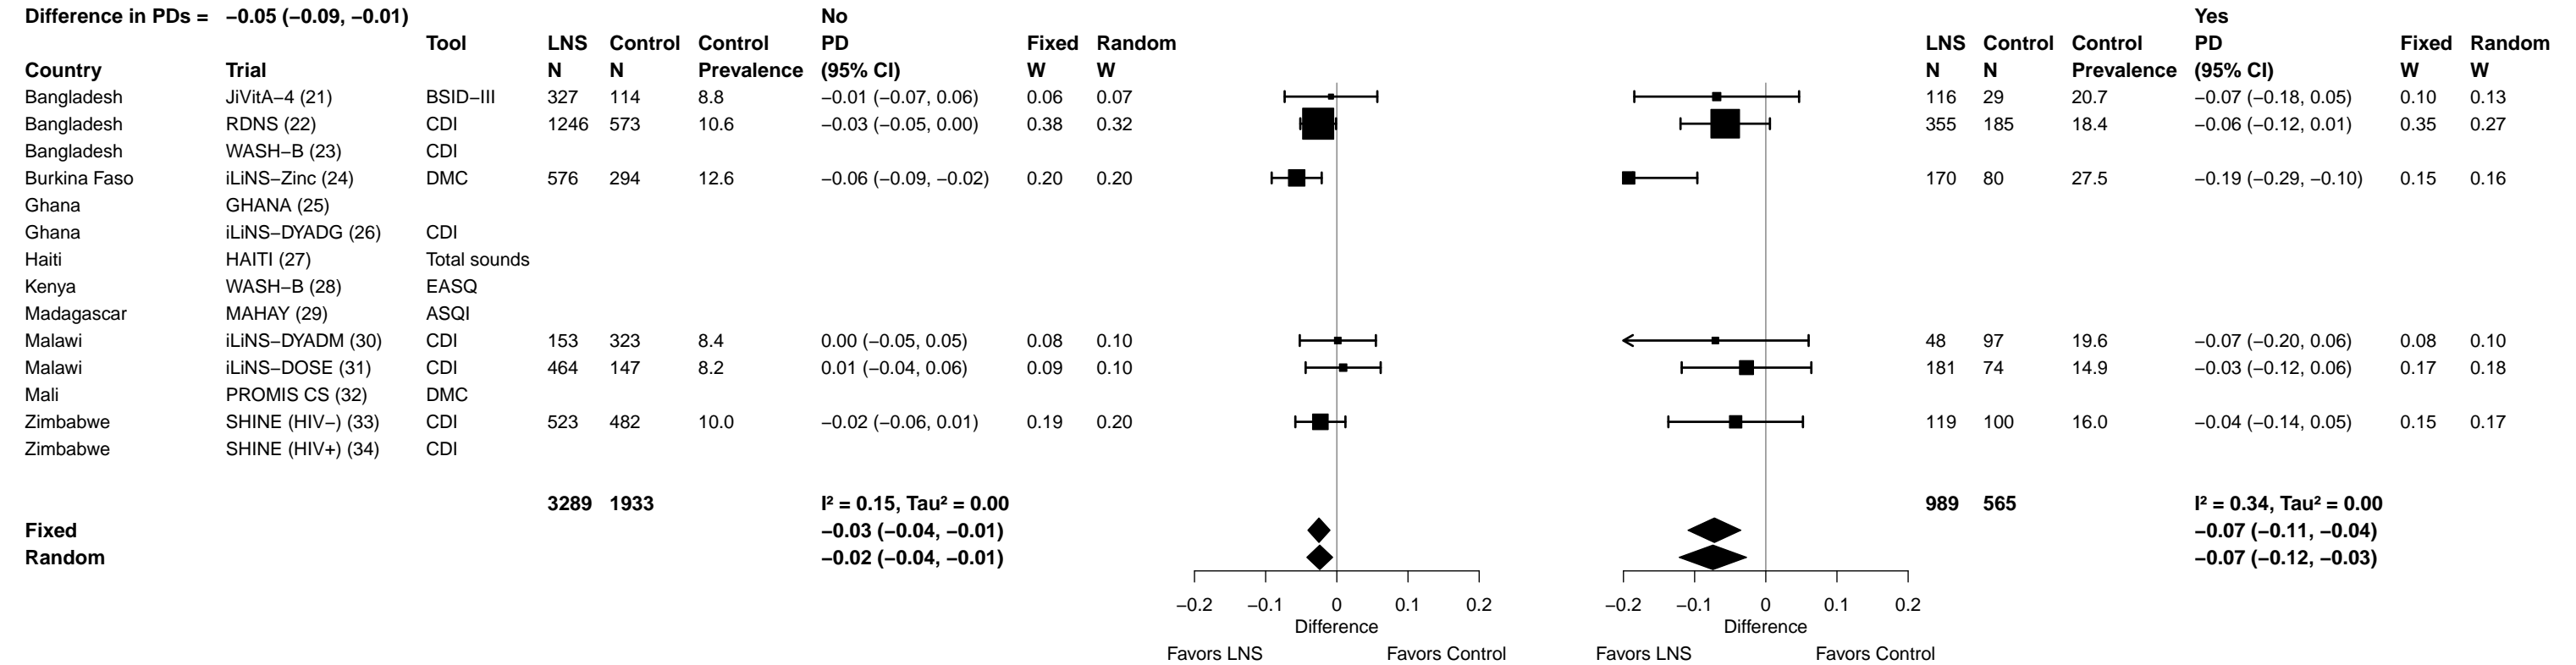

Supplemental figure 5C: Language lowest decile prevalence difference

5C9: Stratified by Child baseline acute malnutrition

P-for-interaction = 0.660

Difference in PDs = -0.02 (-0.09, 0.06)

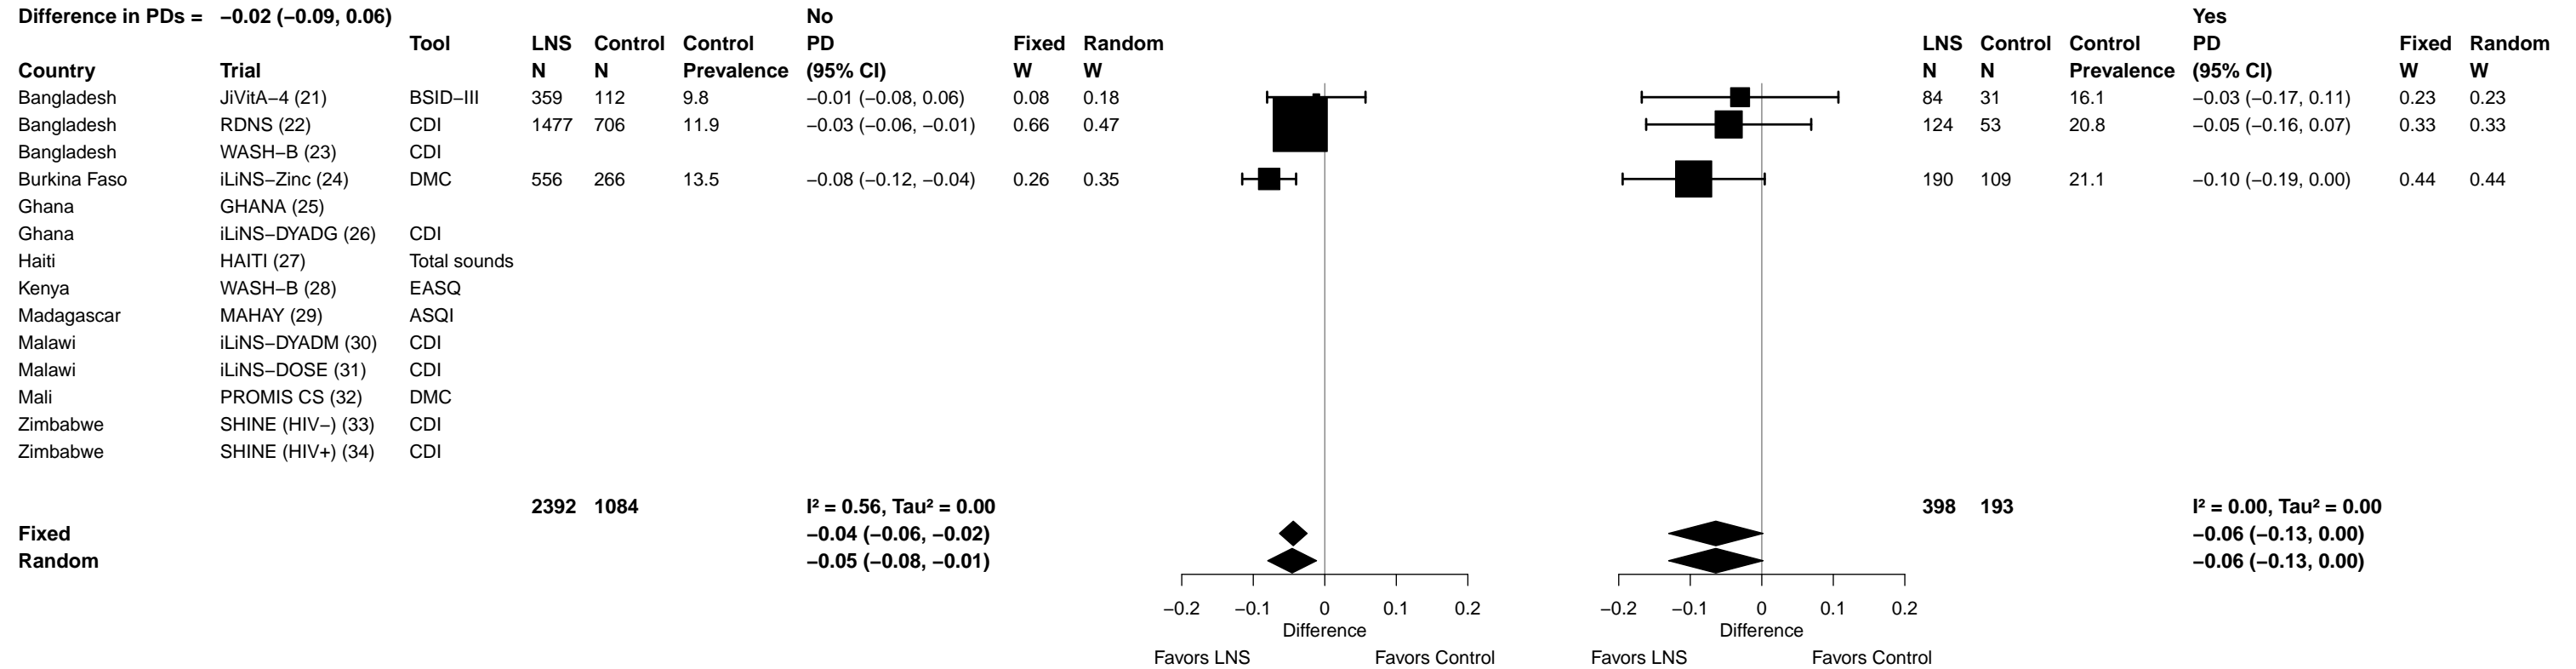

Supplemental figure 5C: Language lowest decile prevalence difference

5C10: Stratified by Child baseline anemia

**P-for-interaction = 0.698**  
**Difference in PDs = 0.01 (-0.04, 0.06)**

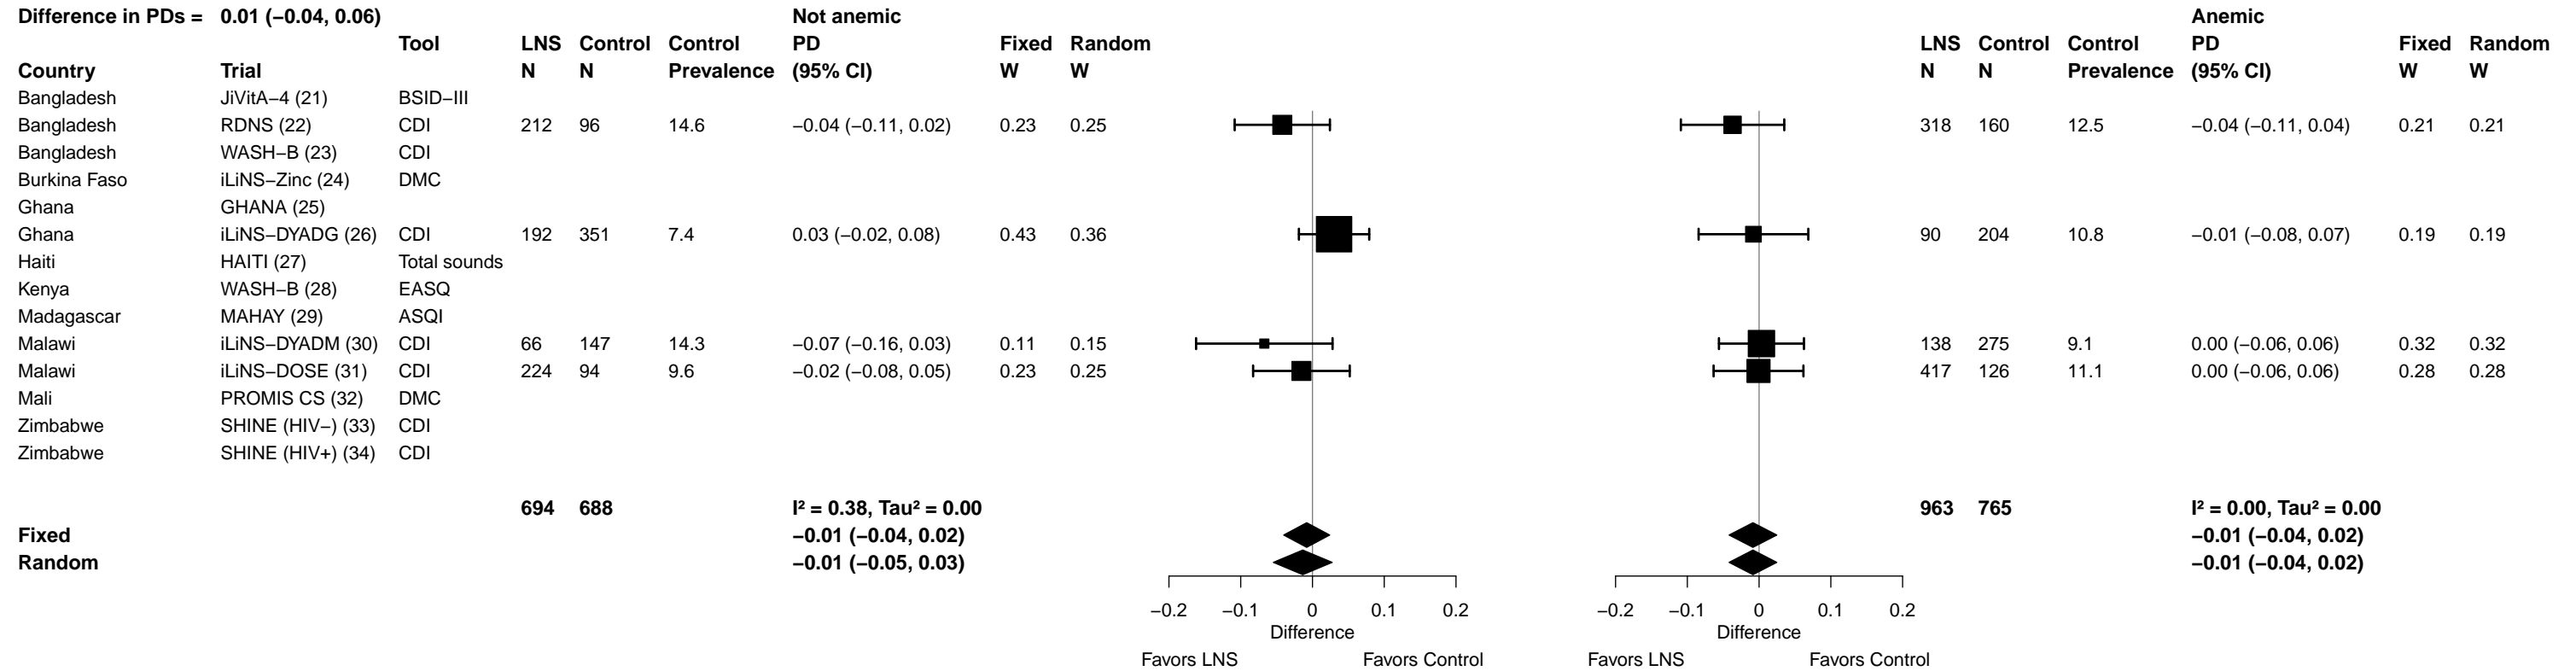

### Supplemental figure 5D: Mean difference in social-emotional z-score

#### 5D1: Stratified by Maternal height

P-for-interaction = 0.511

Difference in MDs = 0.03 (-0.05, 0.10)

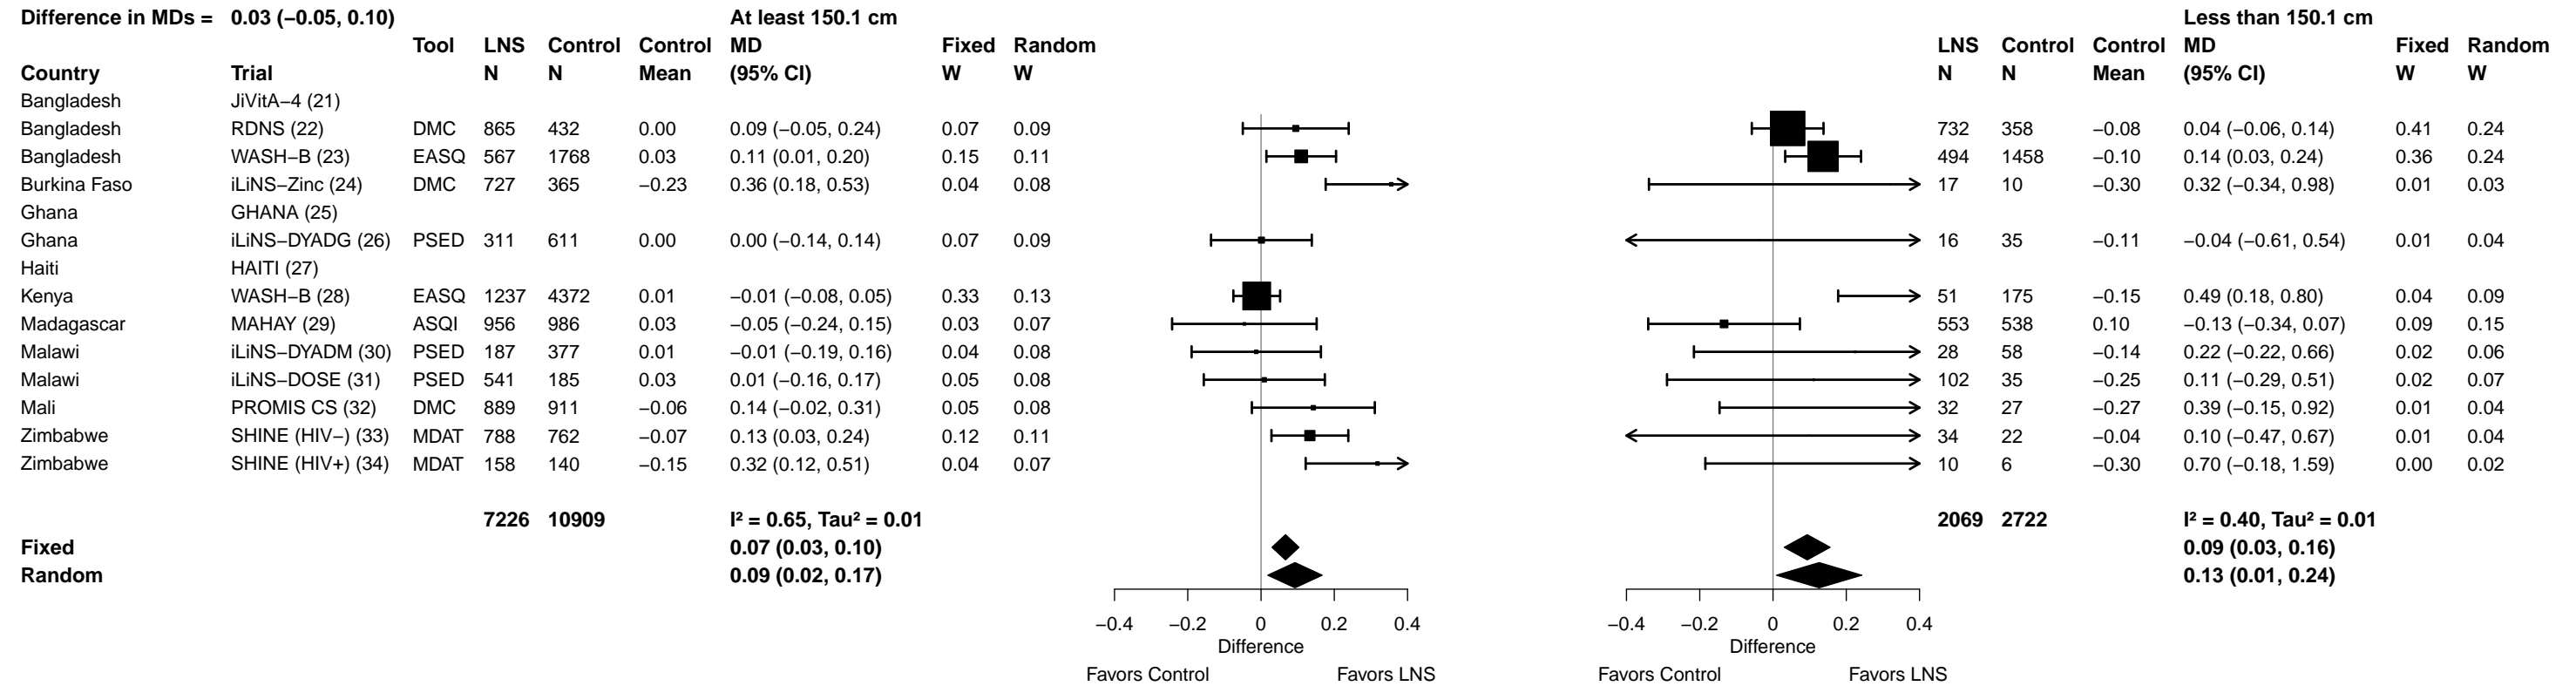



Supplemental figure 5D: Mean difference in social-emotional z-score

5D2: Stratified by Maternal BMI

P-for-interaction = 0.885  
 Difference in MDs = -0.01 (-0.07, 0.06)

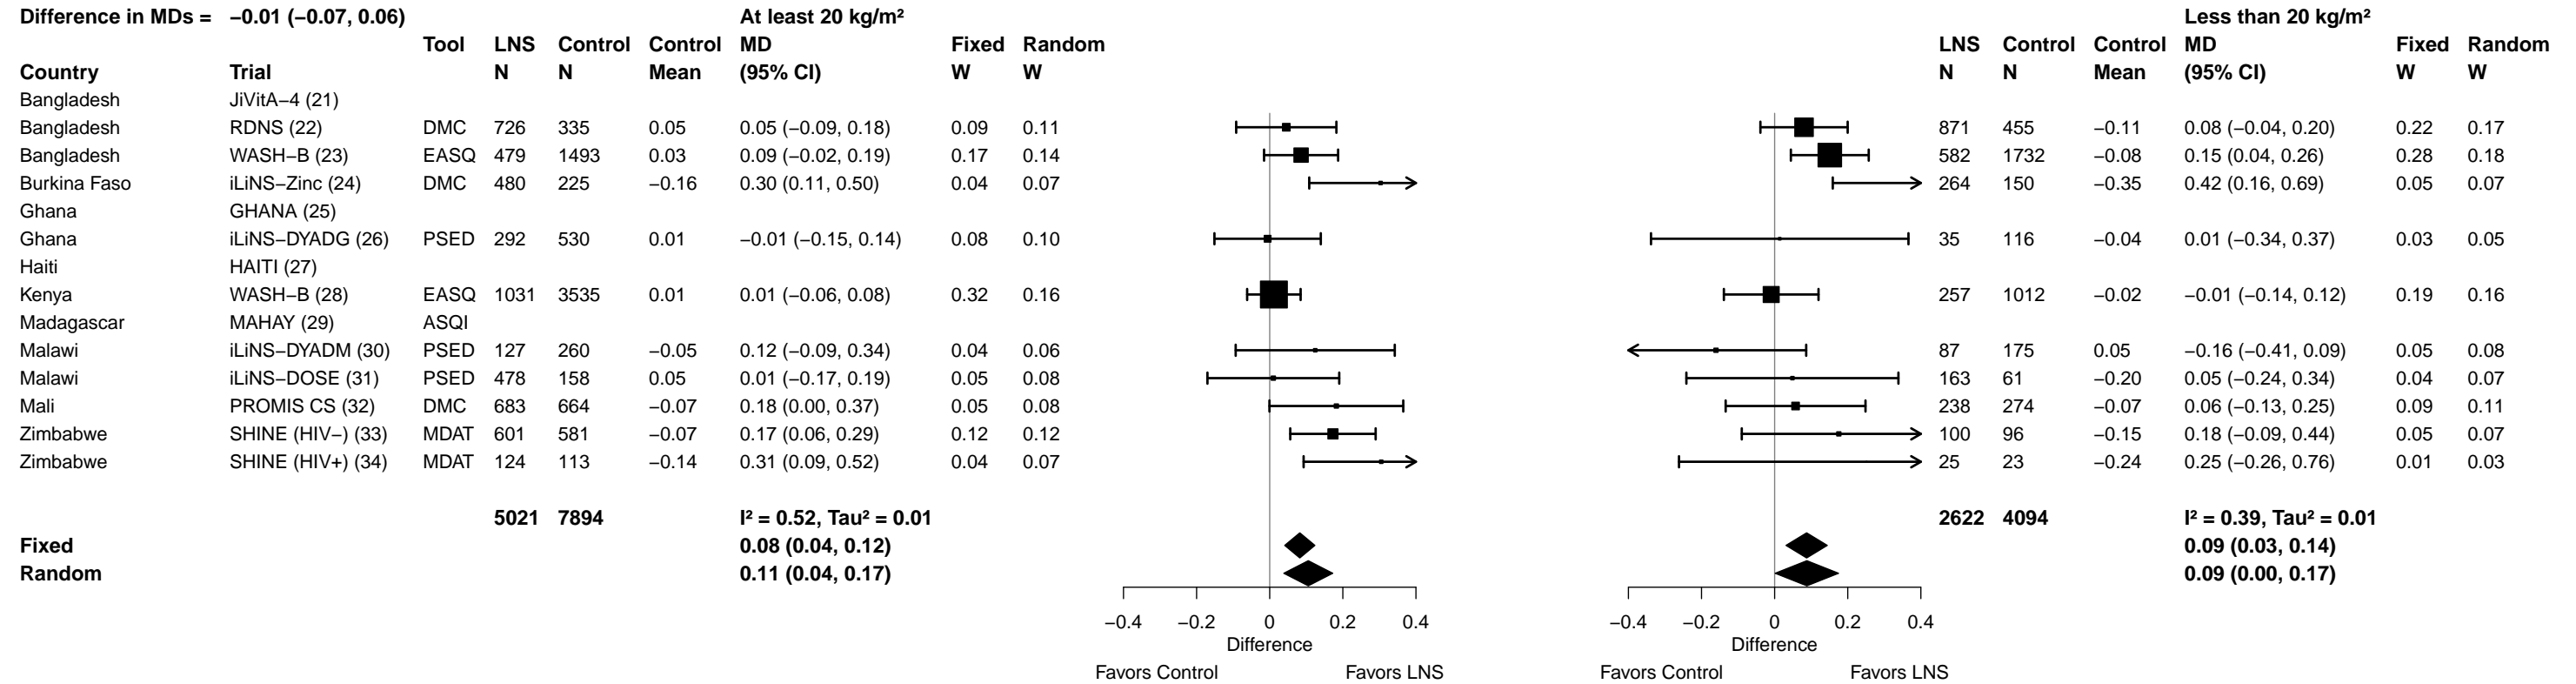

Supplemental figure 5D: Mean difference in social-emotional z-score

5D3: Stratified by Maternal age

P-for-interaction = 0.666  
 Difference in MDs = 0.01 (-0.05, 0.07)

| Country      | Trial             | Tool | LNS N | Control N | Control Mean | At least 25 y |               | MD (95% CI) | Fixed W | Random W | LNS N | Control N | Control Mean | Less than 25 y |               | MD (95% CI) | Fixed W | Random W |
|--------------|-------------------|------|-------|-----------|--------------|---------------|---------------|-------------|---------|----------|-------|-----------|--------------|----------------|---------------|-------------|---------|----------|
|              |                   |      |       |           |              | MD            | (95% CI)      |             |         |          |       |           |              | MD             | (95% CI)      |             |         |          |
| Bangladesh   | JiVitA-4 (21)     |      |       |           |              |               |               |             |         |          |       |           |              |                |               |             |         |          |
| Bangladesh   | RDNS (22)         | DMC  | 450   | 221       | -0.08        | 0.04          | (-0.17, 0.25) | 0.05        | 0.08    |          | 1207  | 594       | -0.01        | 0.07           | (-0.03, 0.17) | 0.21        | 0.16    |          |
| Bangladesh   | WASH-B (23)       | EASQ | 458   | 1442      | -0.01        | -0.02         | (-0.13, 0.09) | 0.19        | 0.11    |          | 603   | 1809      | -0.04        | 0.23           | (0.13, 0.32)  | 0.21        | 0.17    |          |
| Burkina Faso | iLiNS-Zinc (24)   | DMC  | 421   | 232       | -0.30        | 0.43          | (0.23, 0.62)  | 0.05        | 0.08    |          | 321   | 141       | -0.12        | 0.23           | (0.04, 0.42)  | 0.06        | 0.08    |          |
| Ghana        | GHANA (25)        |      |       |           |              |               |               |             |         |          |       |           |              |                |               |             |         |          |
| Ghana        | iLiNS-DYADG (26)  | PSED | 212   | 404       | 0.00         | 0.04          | (-0.13, 0.21) | 0.07        | 0.09    |          | 120   | 253       | -0.01        | -0.05          | (-0.25, 0.16) | 0.05        | 0.07    |          |
| Haiti        | HAITI (27)        |      |       |           |              |               |               |             |         |          |       |           |              |                |               |             |         |          |
| Kenya        | WASH-B (28)       | EASQ | 798   | 2622      | 0.02         | -0.02         | (-0.10, 0.07) | 0.29        | 0.12    |          | 549   | 2092      | -0.03        | 0.06           | (-0.04, 0.15) | 0.22        | 0.17    |          |
| Madagascar   | MAHAY (29)        | ASQI | 852   | 901       | 0.03         | -0.05         | (-0.23, 0.14) | 0.06        | 0.09    |          | 759   | 703       | 0.05         | -0.10          | (-0.31, 0.11) | 0.05        | 0.07    |          |
| Malawi       | iLiNS-DYADM (30)  | PSED | 103   | 224       | -0.03        | 0.04          | (-0.19, 0.27) | 0.04        | 0.08    |          | 112   | 214       | 0.02         | -0.01          | (-0.25, 0.22) | 0.04        | 0.06    |          |
| Malawi       | iLiNS-DOSE (31)   | PSED | 346   | 124       | -0.05        | 0.06          | (-0.15, 0.27) | 0.05        | 0.08    |          | 286   | 90        | 0.00         | 0.00           | (-0.23, 0.24) | 0.04        | 0.06    |          |
| Mali         | PROMIS CS (32)    | DMC  | 492   | 492       | -0.07        | 0.17          | (-0.02, 0.36) | 0.06        | 0.09    |          | 435   | 452       | -0.07        | 0.12           | (-0.07, 0.31) | 0.05        | 0.08    |          |
| Zimbabwe     | SHINE (HIV-) (33) | MDAT | 427   | 389       | -0.06        | 0.17          | (0.03, 0.32)  | 0.09        | 0.10    |          | 326   | 321       | -0.10        | 0.11           | (-0.05, 0.28) | 0.07        | 0.09    |          |
| Zimbabwe     | SHINE (HIV+) (34) | MDAT | 126   | 111       | -0.25        | 0.43          | (0.22, 0.64)  | 0.05        | 0.08    |          | 29    | 26        | -0.01        | 0.03           | (-0.58, 0.65) | 0.01        | 0.01    |          |

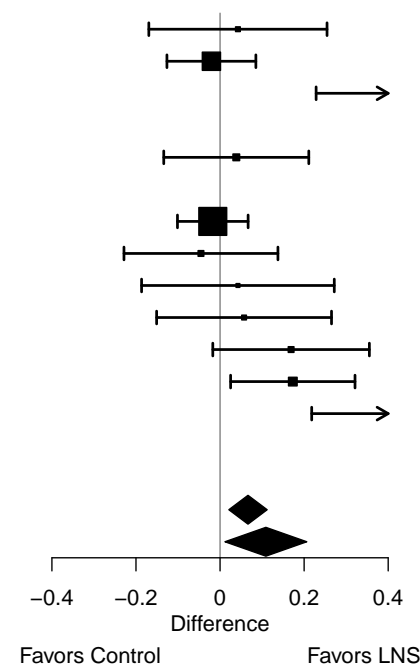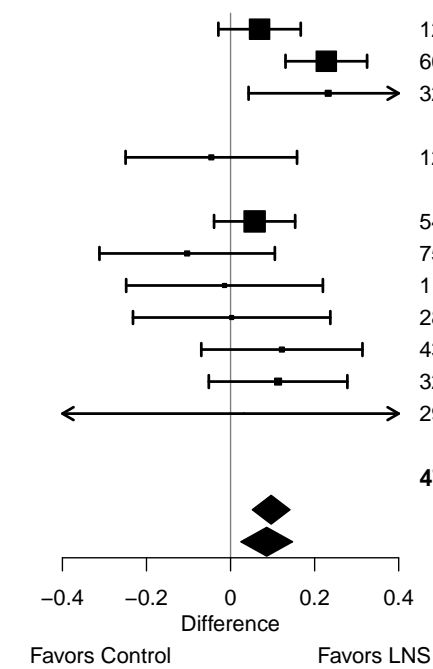

Fixed  
 Random

**I<sup>2</sup> = 0.72, Tau<sup>2</sup> = 0.02**  
**0.07 (0.02, 0.11)**  
**0.11 (0.01, 0.21)**

**I<sup>2</sup> = 0.41, Tau<sup>2</sup> = 0.00**  
**0.10 (0.05, 0.14)**  
**0.09 (0.02, 0.15)**

Supplemental figure 5D: Mean difference in social-emotional z-score

5D4: Stratified by Maternal education

P-for-interaction = 0.700  
 Difference in MDs = -0.01 (-0.08, 0.05)

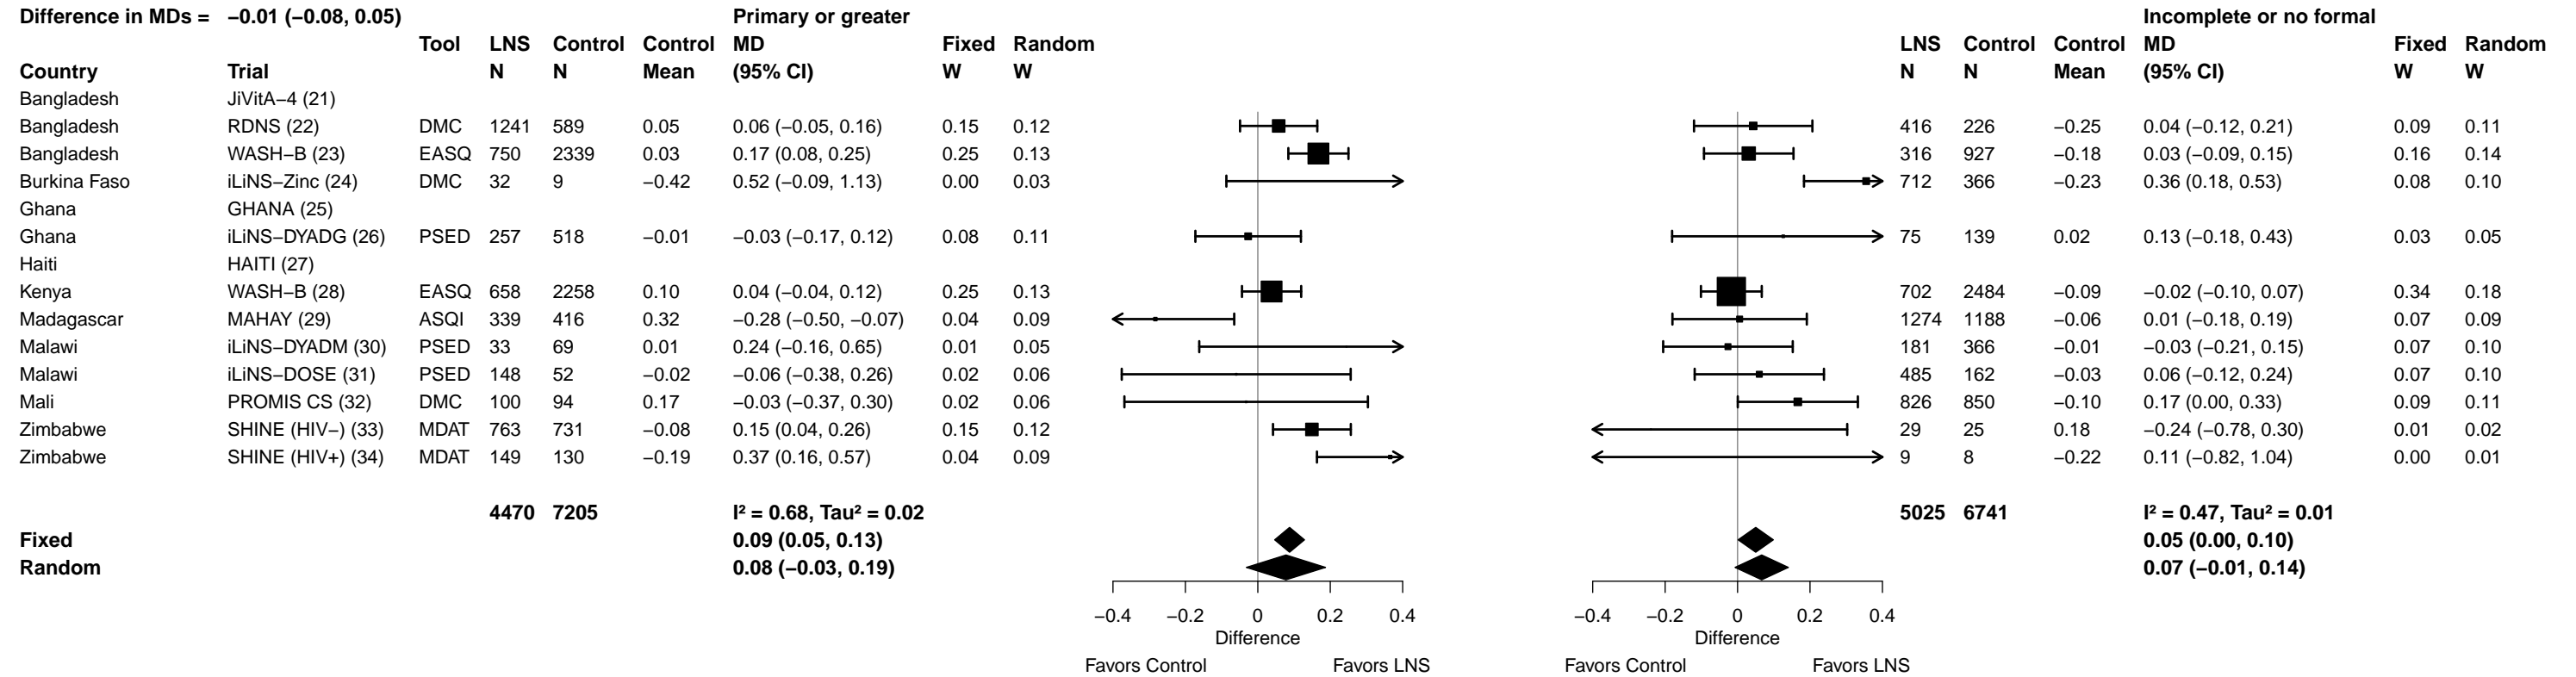

Supplemental figure 5D: Mean difference in social-emotional z-score

5D5: Stratified by Maternal depressive symptoms

P-for-interaction = 0.335

Difference in MDs = 0.04 (-0.04, 0.11)

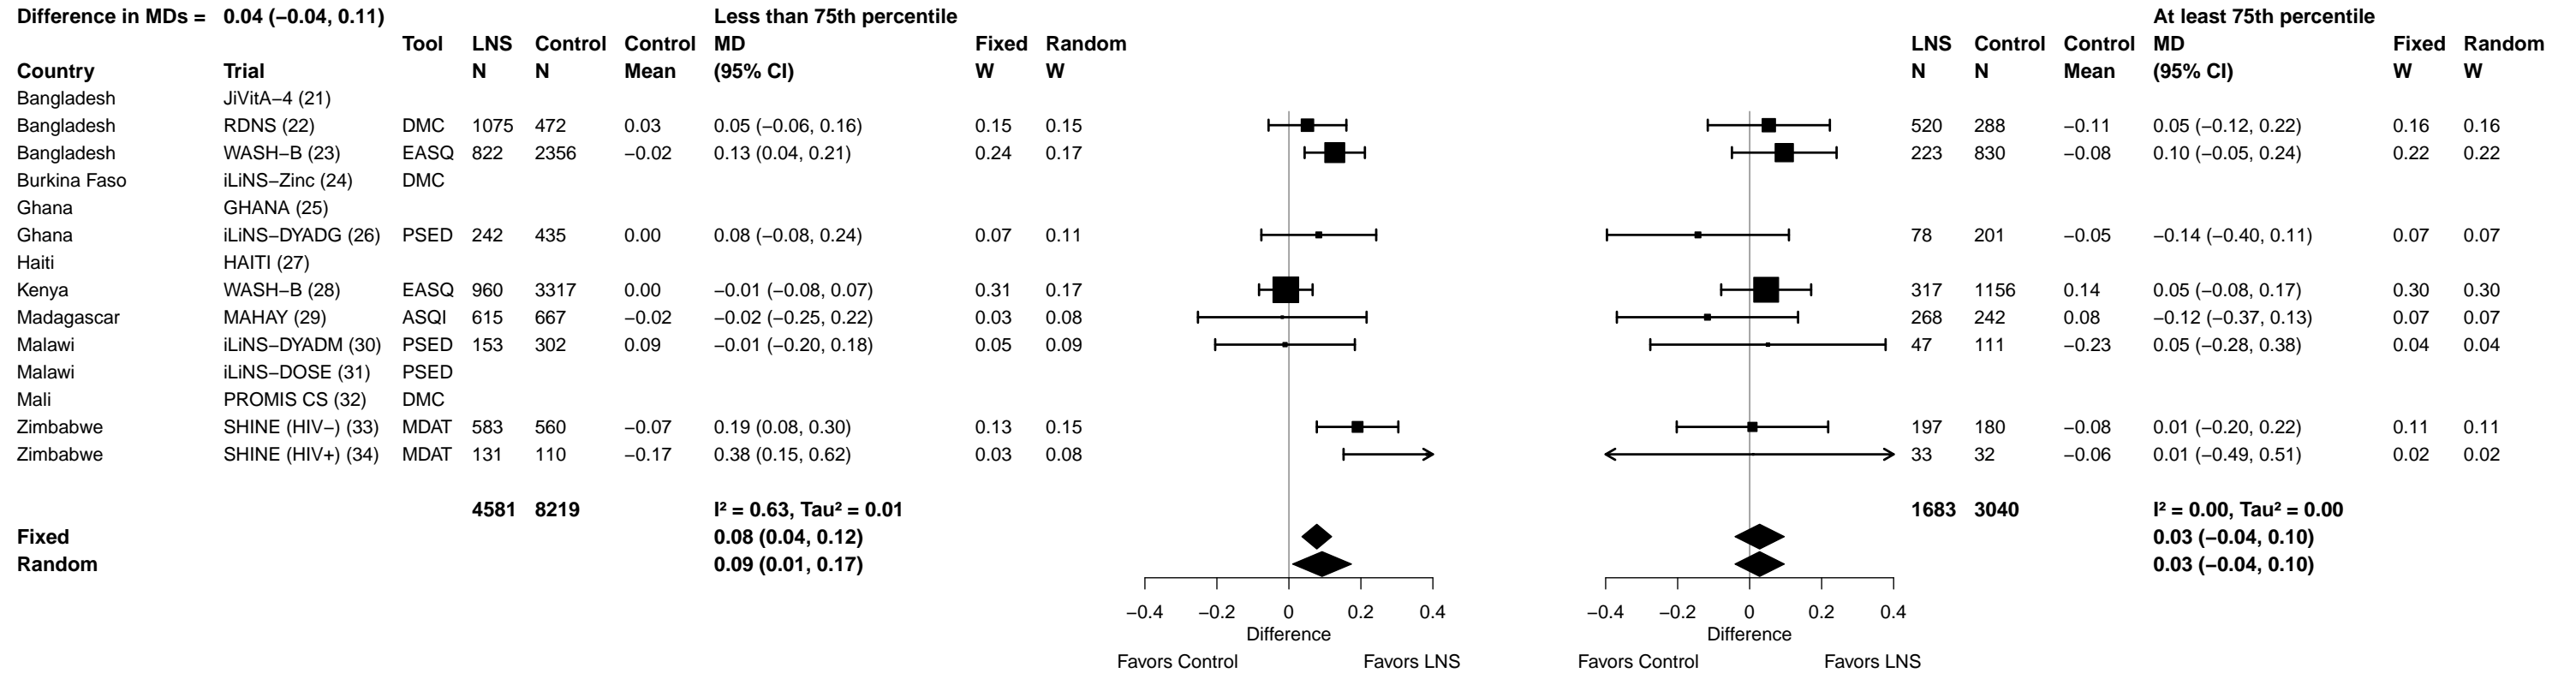

Supplemental figure 5D: Mean difference in social-emotional z-score

5D6: Stratified by Child sex

P-for-interaction = 0.706  
 Difference in MDs = -0.01 (-0.06, 0.04)

| Country      | Trial             | Tool | LNS N | Control N | Control Mean | Male                |         | LNS N | Control N | Control Mean | Female   |                     |         |          |
|--------------|-------------------|------|-------|-----------|--------------|---------------------|---------|-------|-----------|--------------|----------|---------------------|---------|----------|
|              |                   |      |       |           |              | MD (95% CI)         | Fixed W |       |           |              | Random W | MD (95% CI)         | Fixed W | Random W |
| Bangladesh   | JiVitA-4 (21)     |      |       |           |              |                     |         |       |           |              |          |                     |         |          |
| Bangladesh   | RDNS (22)         | DMC  | 830   | 411       | 0.02         | -0.02 (-0.12, 0.08) | 0.18    | 0.12  | 827       | 404          | -0.08    | 0.15 (0.01, 0.29)   | 0.10    | 0.11     |
| Bangladesh   | WASH-B (23)       | EASQ | 522   | 1635      | -0.04        | 0.16 (0.05, 0.27)   | 0.15    | 0.12  | 544       | 1631         | -0.02    | 0.09 (-0.01, 0.19)  | 0.22    | 0.12     |
| Burkina Faso | iLiNS-Zinc (24)   | DMC  | 372   | 193       | -0.22        | 0.34 (0.20, 0.48)   | 0.09    | 0.10  | 374       | 182          | -0.25    | 0.38 (0.12, 0.63)   | 0.03    | 0.07     |
| Ghana        | GHANA (25)        |      |       |           |              |                     |         |       |           |              |          |                     |         |          |
| Ghana        | iLiNS-DYADG (26)  | PSED | 164   | 306       | 0.01         | -0.04 (-0.22, 0.15) | 0.05    | 0.08  | 168       | 351          | -0.02    | 0.05 (-0.14, 0.24)  | 0.06    | 0.09     |
| Haiti        | HAITI (27)        |      |       |           |              |                     |         |       |           |              |          |                     |         |          |
| Kenya        | WASH-B (28)       | EASQ | 682   | 2260      | 0.00         | 0.00 (-0.08, 0.09)  | 0.23    | 0.13  | 680       | 2485         | 0.00     | 0.02 (-0.06, 0.11)  | 0.28    | 0.13     |
| Madagascar   | MAHAY (29)        | ASQI | 795   | 787       | 0.00         | 0.00 (-0.19, 0.19)  | 0.05    | 0.08  | 818       | 817          | 0.07     | -0.14 (-0.34, 0.05) | 0.05    | 0.09     |
| Malawi       | iLiNS-DYADM (30)  | PSED | 105   | 205       | -0.02        | 0.07 (-0.17, 0.31)  | 0.03    | 0.06  | 110       | 233          | 0.01     | -0.04 (-0.26, 0.19) | 0.04    | 0.08     |
| Malawi       | iLiNS-DOSE (31)   | PSED | 320   | 117       | 0.05         | -0.07 (-0.29, 0.15) | 0.04    | 0.07  | 324       | 104          | -0.11    | 0.15 (-0.07, 0.36)  | 0.04    | 0.08     |
| Mali         | PROMIS CS (32)    | DMC  | 469   | 514       | -0.08        | 0.17 (0.00, 0.33)   | 0.07    | 0.09  | 458       | 430          | -0.07    | 0.13 (-0.08, 0.33)  | 0.05    | 0.08     |
| Zimbabwe     | SHINE (HIV-) (33) | MDAT | 424   | 388       | -0.10        | 0.20 (0.05, 0.34)   | 0.09    | 0.10  | 417       | 411          | -0.02    | 0.05 (-0.09, 0.19)  | 0.11    | 0.11     |
| Zimbabwe     | SHINE (HIV+) (34) | MDAT | 84    | 79        | -0.12        | 0.24 (-0.04, 0.51)  | 0.02    | 0.05  | 86        | 72           | -0.26    | 0.48 (0.16, 0.80)   | 0.02    | 0.05     |

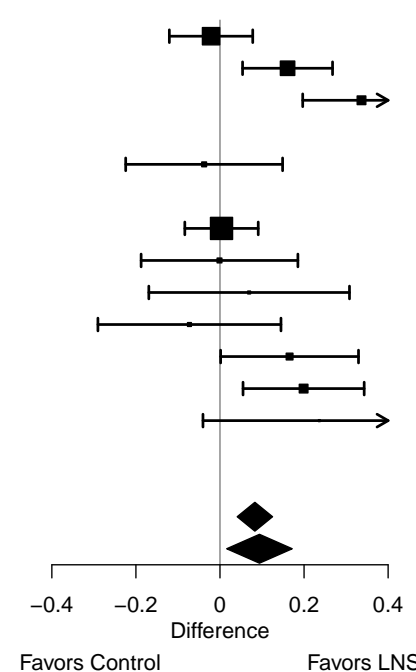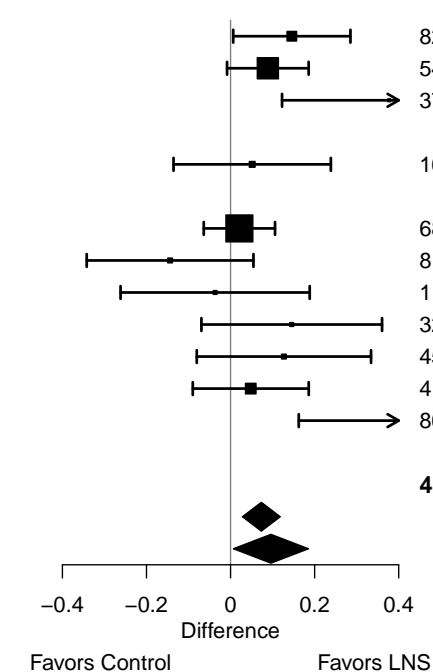

**Fixed**  
**Random**

**4767 6895**

**I<sup>2</sup> = 0.68, Tau<sup>2</sup> = 0.01**  
**0.08 (0.04, 0.13)**  
**0.09 (0.02, 0.17)**

**4806 7120**

**I<sup>2</sup> = 0.52, Tau<sup>2</sup> = 0.01**  
**0.07 (0.03, 0.12)**  
**0.10 (0.01, 0.19)**

Supplemental figure 5D: Mean difference in social-emotional z-score

5D7: Stratified by Child birth order

P-for-interaction = 0.979  
 Difference in MDs = 0.00 (-0.06, 0.07)

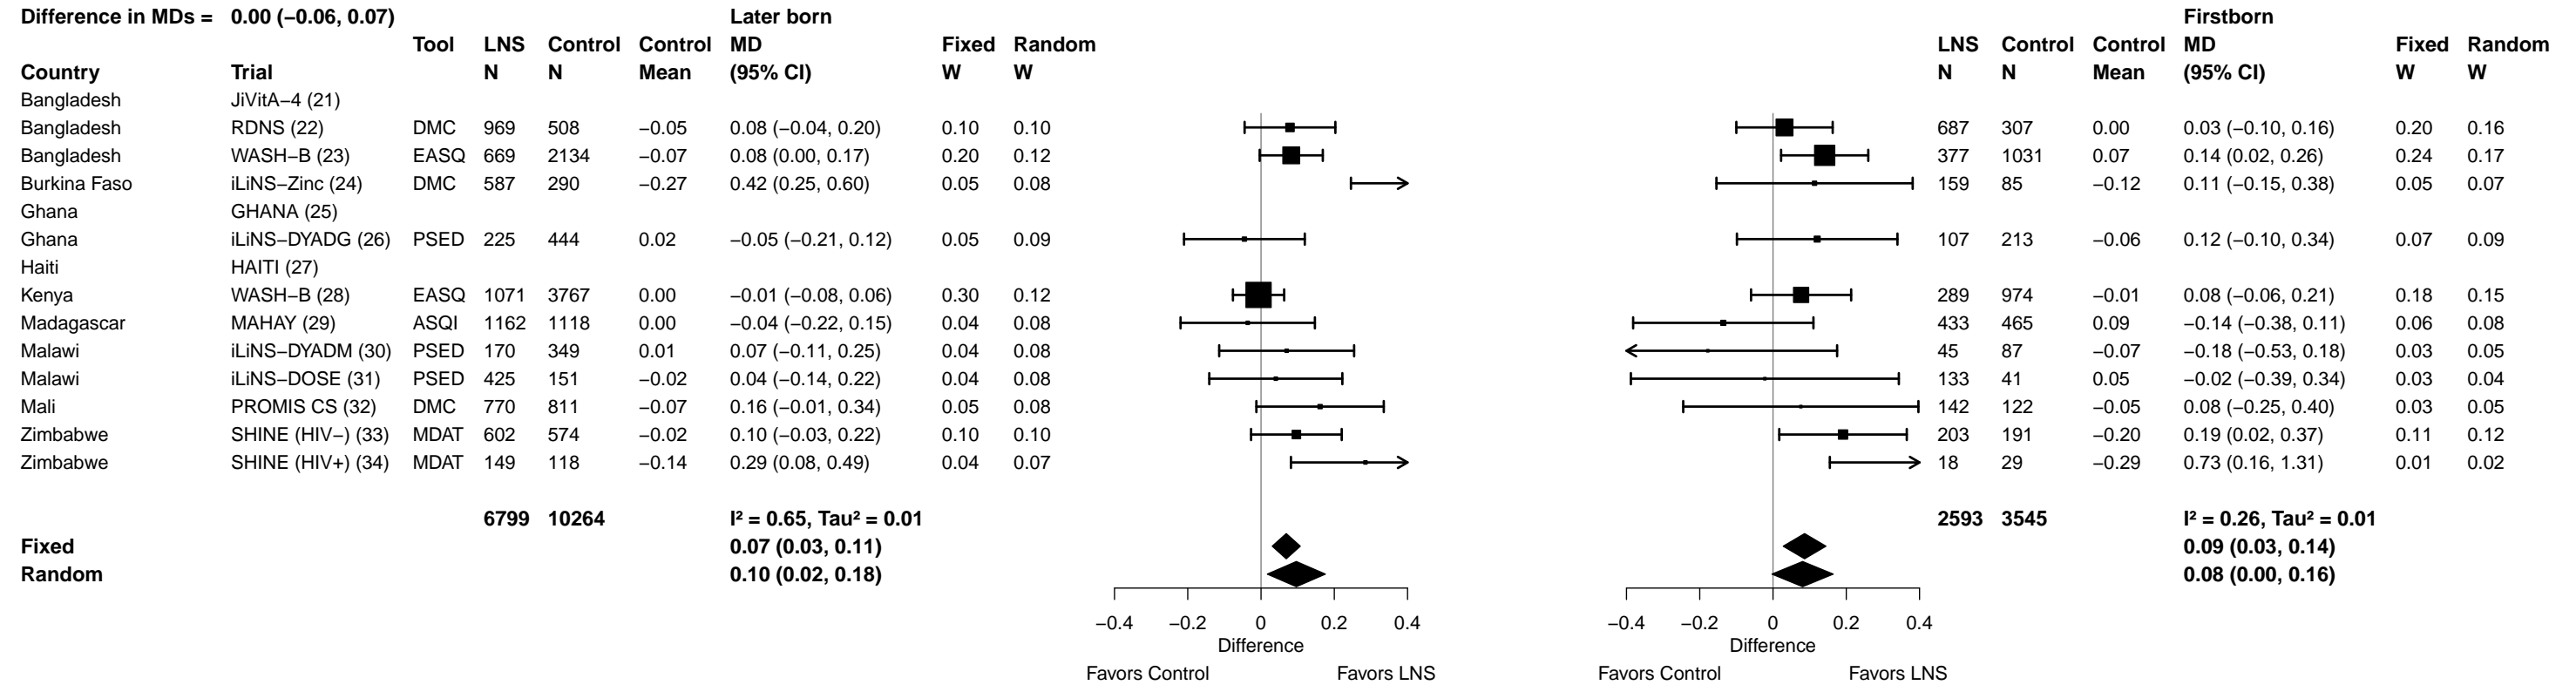

Supplemental figure 5D: Mean difference in social-emotional z-score

5D8: Stratified by Child baseline stunting

P-for-interaction = 0.495  
 Difference in MDs = 0.04 (-0.08, 0.16)

| Country       | Trial             | Tool | LNS N       | Control N   | Control Mean | No                                                  |      | Fixed W | Random W | LNS N      | Control N  | Control Mean | Yes                                                 |      | Fixed W | Random W |
|---------------|-------------------|------|-------------|-------------|--------------|-----------------------------------------------------|------|---------|----------|------------|------------|--------------|-----------------------------------------------------|------|---------|----------|
|               |                   |      |             |             |              | MD (95% CI)                                         |      |         |          |            |            |              | MD (95% CI)                                         |      |         |          |
| Bangladesh    | JiVitA-4 (21)     |      |             |             |              |                                                     |      |         |          |            |            |              |                                                     |      |         |          |
| Bangladesh    | RDNS (22)         | DMC  | 1241        | 574         | 0.06         | 0.01 (-0.08, 0.10)                                  | 0.36 | 0.19    |          | 354        | 185        | -0.29        | 0.18 (-0.03, 0.40)                                  | 0.25 | 0.24    |          |
| Bangladesh    | WASH-B (23)       | EASQ |             |             |              |                                                     |      |         |          |            |            |              |                                                     |      |         |          |
| Burkina Faso  | iLiNS-Zinc (24)   | DMC  | 576         | 294         | -0.16        | 0.35 (0.19, 0.52)                                   | 0.11 | 0.14    |          | 170        | 80         | -0.50        | 0.37 (0.06, 0.68)                                   | 0.12 | 0.13    |          |
| Ghana         | GHANA (25)        |      |             |             |              |                                                     |      |         |          |            |            |              |                                                     |      |         |          |
| Ghana         | iLiNS-DYADG (26)  | PSED | 280         | 547         | 0.00         | 0.00 (-0.14, 0.15)                                  | 0.14 | 0.16    |          | 28         | 63         | 0.02         | 0.09 (-0.32, 0.51)                                  | 0.07 | 0.07    |          |
| Haiti         | HAITI (27)        |      |             |             |              |                                                     |      |         |          |            |            |              |                                                     |      |         |          |
| Kenya         | WASH-B (28)       | EASQ |             |             |              |                                                     |      |         |          |            |            |              |                                                     |      |         |          |
| Madagascar    | MAHAY (29)        | ASQI |             |             |              |                                                     |      |         |          |            |            |              |                                                     |      |         |          |
| Malawi        | iLiNS-DYADM (30)  | PSED | 153         | 323         | 0.03         | 0.01 (-0.19, 0.20)                                  | 0.08 | 0.13    |          | 48         | 96         | -0.06        | 0.02 (-0.31, 0.35)                                  | 0.11 | 0.11    |          |
| Malawi        | iLiNS-DOSE (31)   | PSED | 464         | 147         | -0.04        | 0.07 (-0.11, 0.26)                                  | 0.09 | 0.13    |          | 180        | 74         | 0.02         | -0.06 (-0.33, 0.21)                                 | 0.17 | 0.17    |          |
| Mali          | PROMIS CS (32)    | DMC  |             |             |              |                                                     |      |         |          |            |            |              |                                                     |      |         |          |
| Zimbabwe      | SHINE (HIV-) (33) | MDAT | 532         | 490         | -0.02        | 0.15 (0.02, 0.28)                                   | 0.17 | 0.16    |          | 122        | 105        | -0.26        | 0.12 (-0.11, 0.35)                                  | 0.22 | 0.21    |          |
| Zimbabwe      | SHINE (HIV+) (34) | MDAT | 115         | 89          | -0.18        | 0.35 (0.08, 0.62)                                   | 0.04 | 0.09    |          | 34         | 32         | -0.34        | 0.42 (-0.02, 0.86)                                  | 0.06 | 0.07    |          |
|               |                   |      | <b>3361</b> | <b>2464</b> |              |                                                     |      |         |          | <b>936</b> | <b>635</b> |              |                                                     |      |         |          |
| <b>Fixed</b>  |                   |      |             |             |              | <b>I<sup>2</sup> = 0.68, Tau<sup>2</sup> = 0.02</b> |      |         |          |            |            |              | <b>I<sup>2</sup> = 0.08, Tau<sup>2</sup> = 0.00</b> |      |         |          |
| <b>Random</b> |                   |      |             |             |              | <b>0.09 (0.04, 0.15)</b>                            |      |         |          |            |            |              | <b>0.14 (0.03, 0.25)</b>                            |      |         |          |
|               |                   |      |             |             |              | <b>0.12 (0.01, 0.23)</b>                            |      |         |          |            |            |              | <b>0.14 (0.03, 0.26)</b>                            |      |         |          |

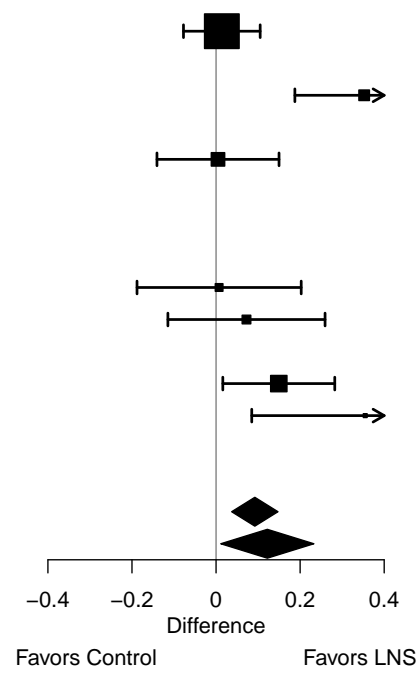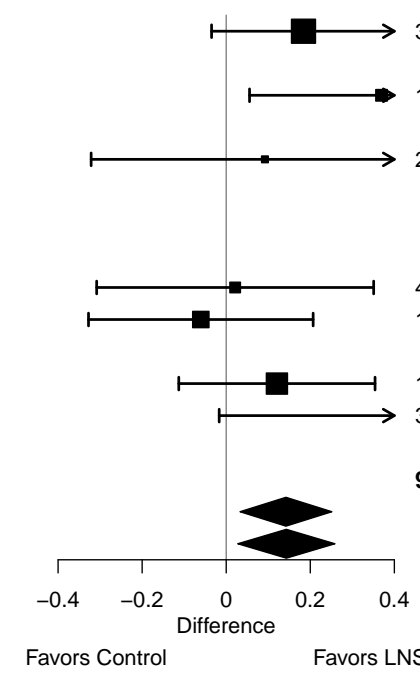

Supplemental figure 5D: Mean difference in social-emotional z-score

5D9: Stratified by Child baseline acute malnutrition

P-for-interaction = 0.349

Difference in MDs = 0.08 (-0.08, 0.24)

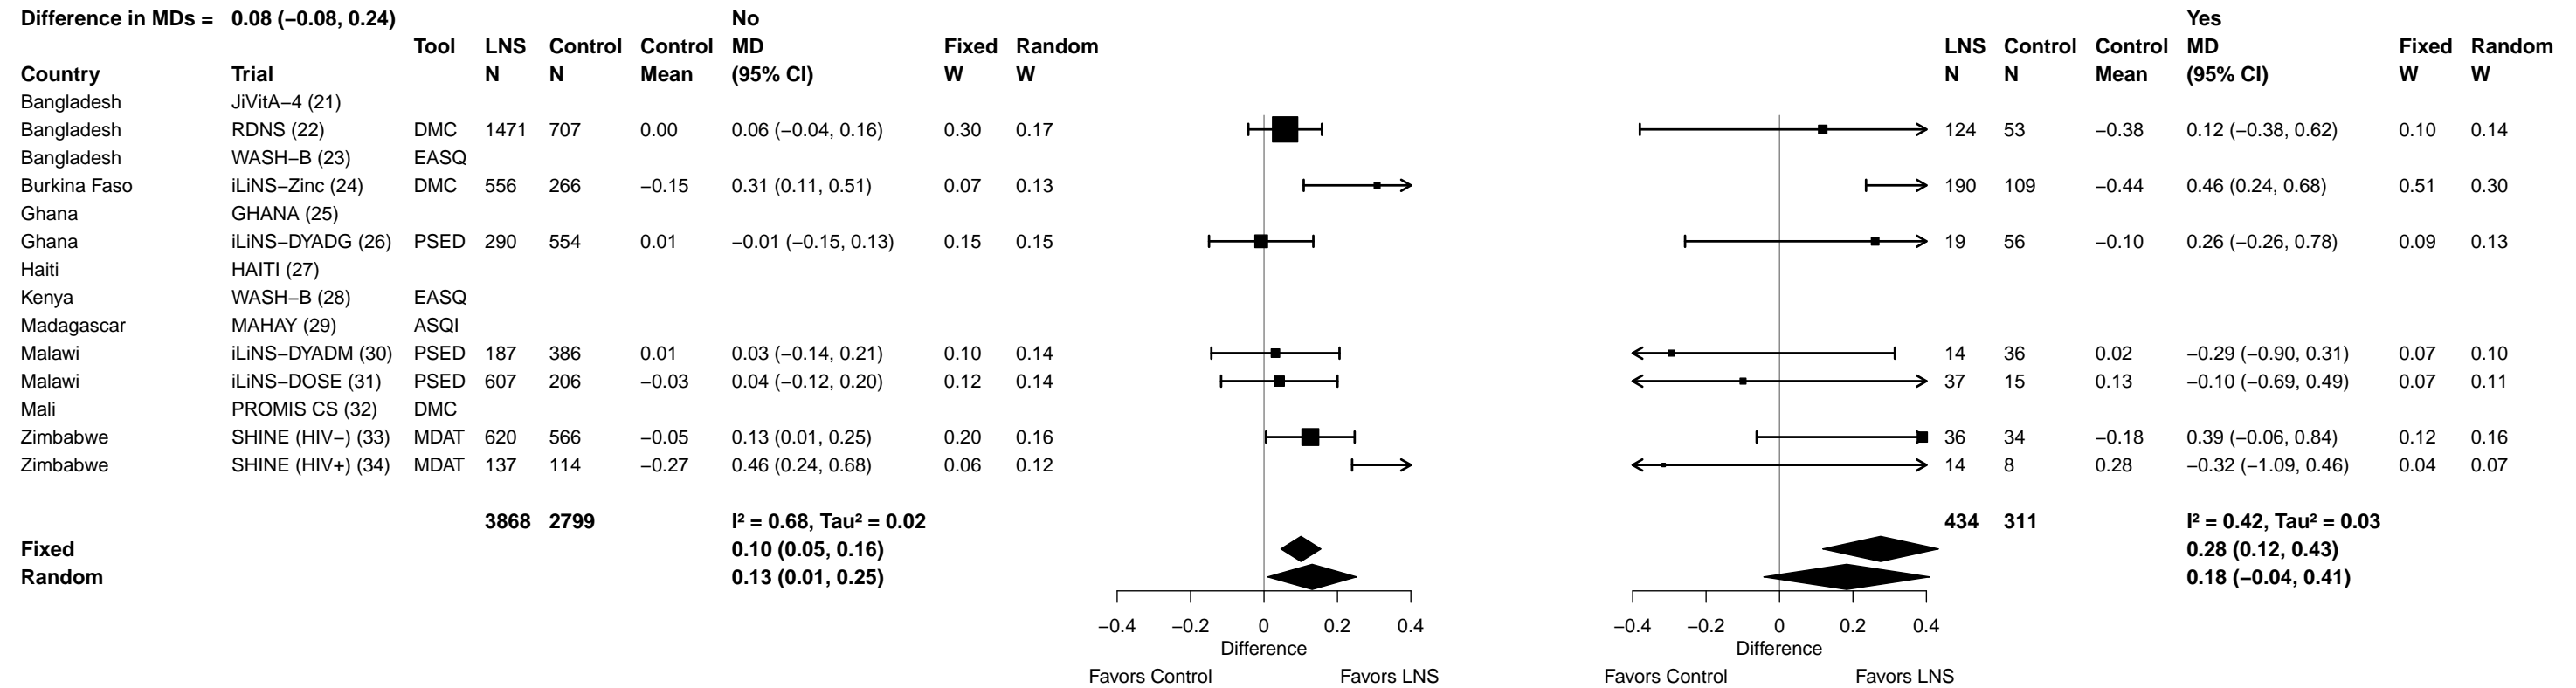



Supplemental figure 5D: Mean difference in social-emotional z-score

5D10: Stratified by Child baseline anemia

P-for-interaction = 0.834  
 Difference in MDs = -0.02 (-0.17, 0.14)

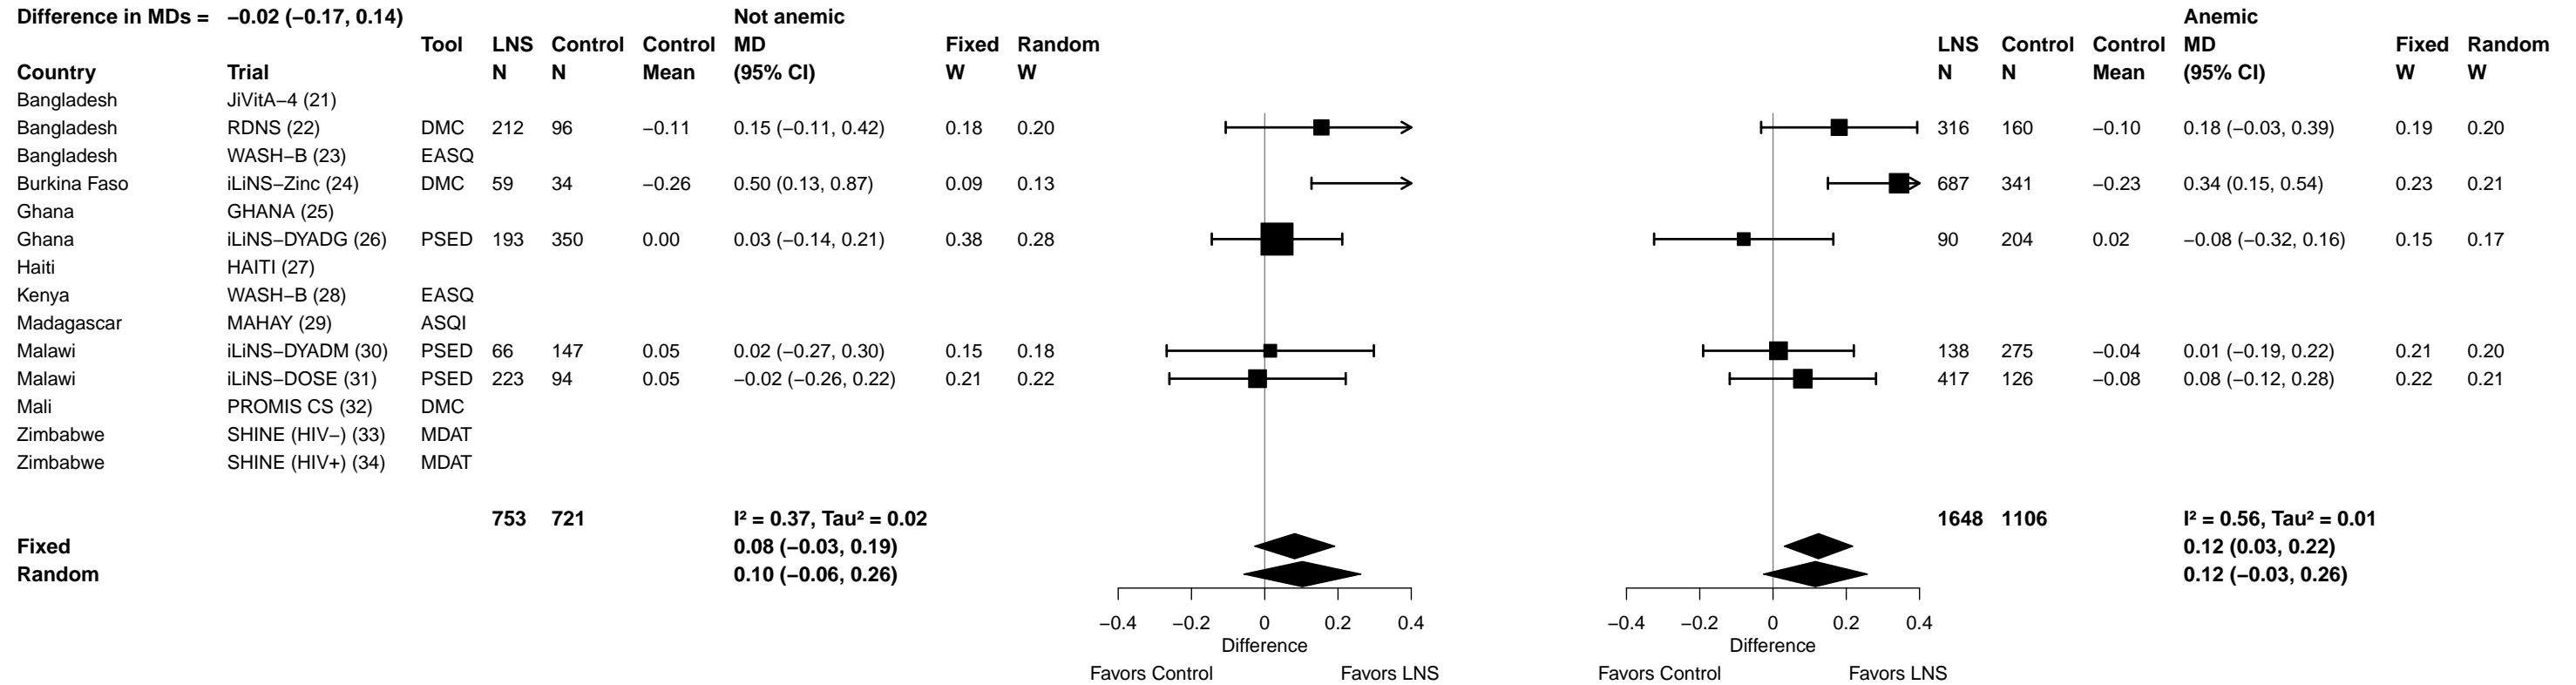

### Supplemental figure 5E: Social-emotional lowest decile prevalence ratio

#### 5E1: Stratified by Maternal height

P-for-interaction = 0.638

Ratio of PRs = 1.06 (0.82, 1.38)

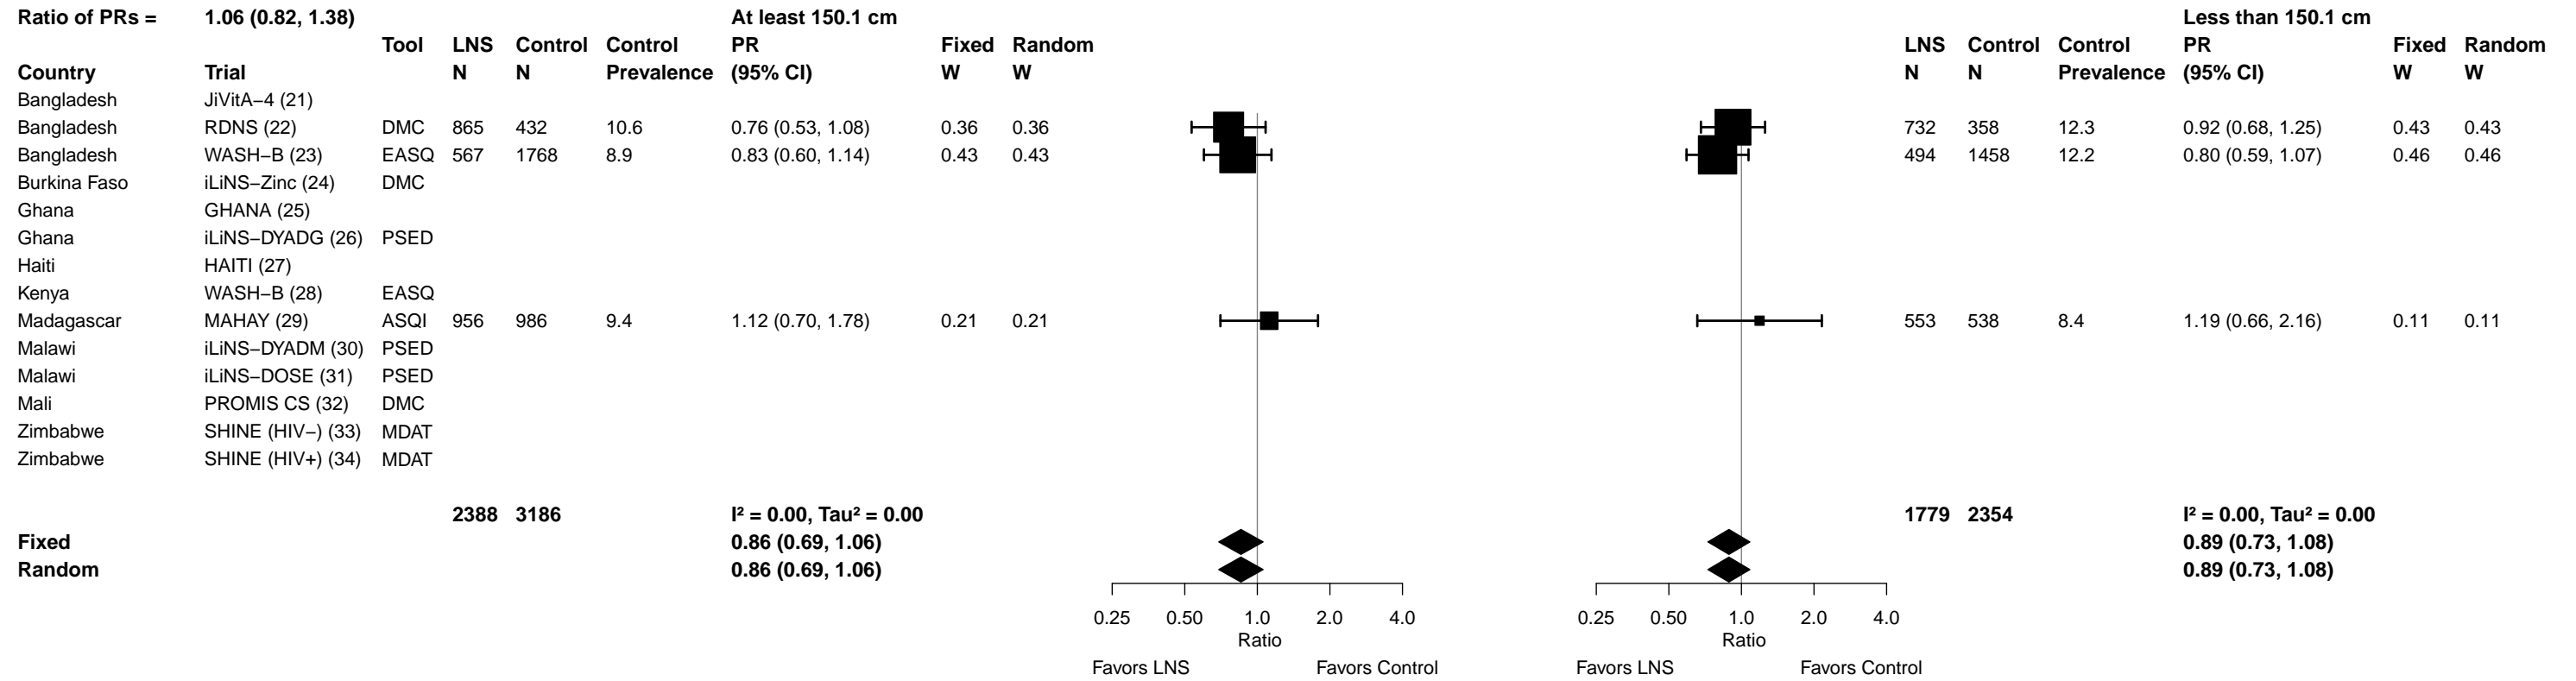

Supplemental figure 5E: Social-emotional lowest decile prevalence ratio

5E2: Stratified by Maternal BMI

P-for-interaction = 0.199

Ratio of PRs = 1.16 (0.93, 1.45)

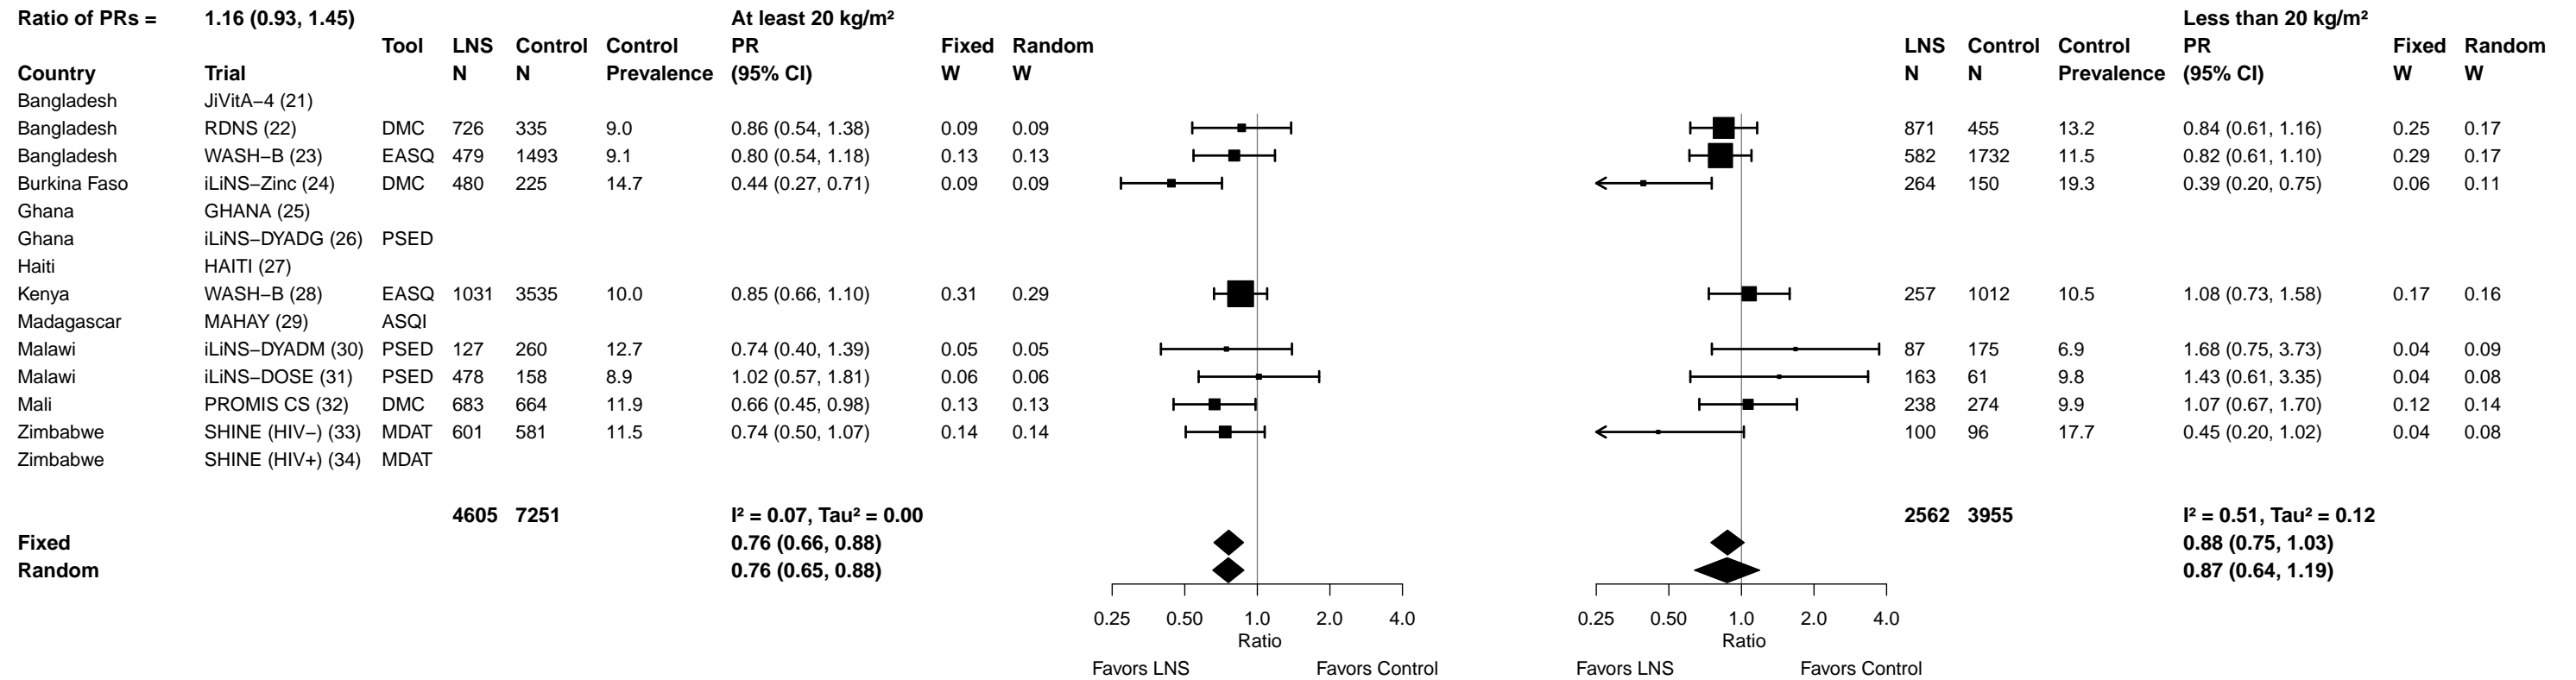

Supplemental figure 5E: Social-emotional lowest decile prevalence ratio

5E3: Stratified by Maternal age

P-for-interaction = 0.546  
 Ratio of PRs = 0.95 (0.79, 1.13)

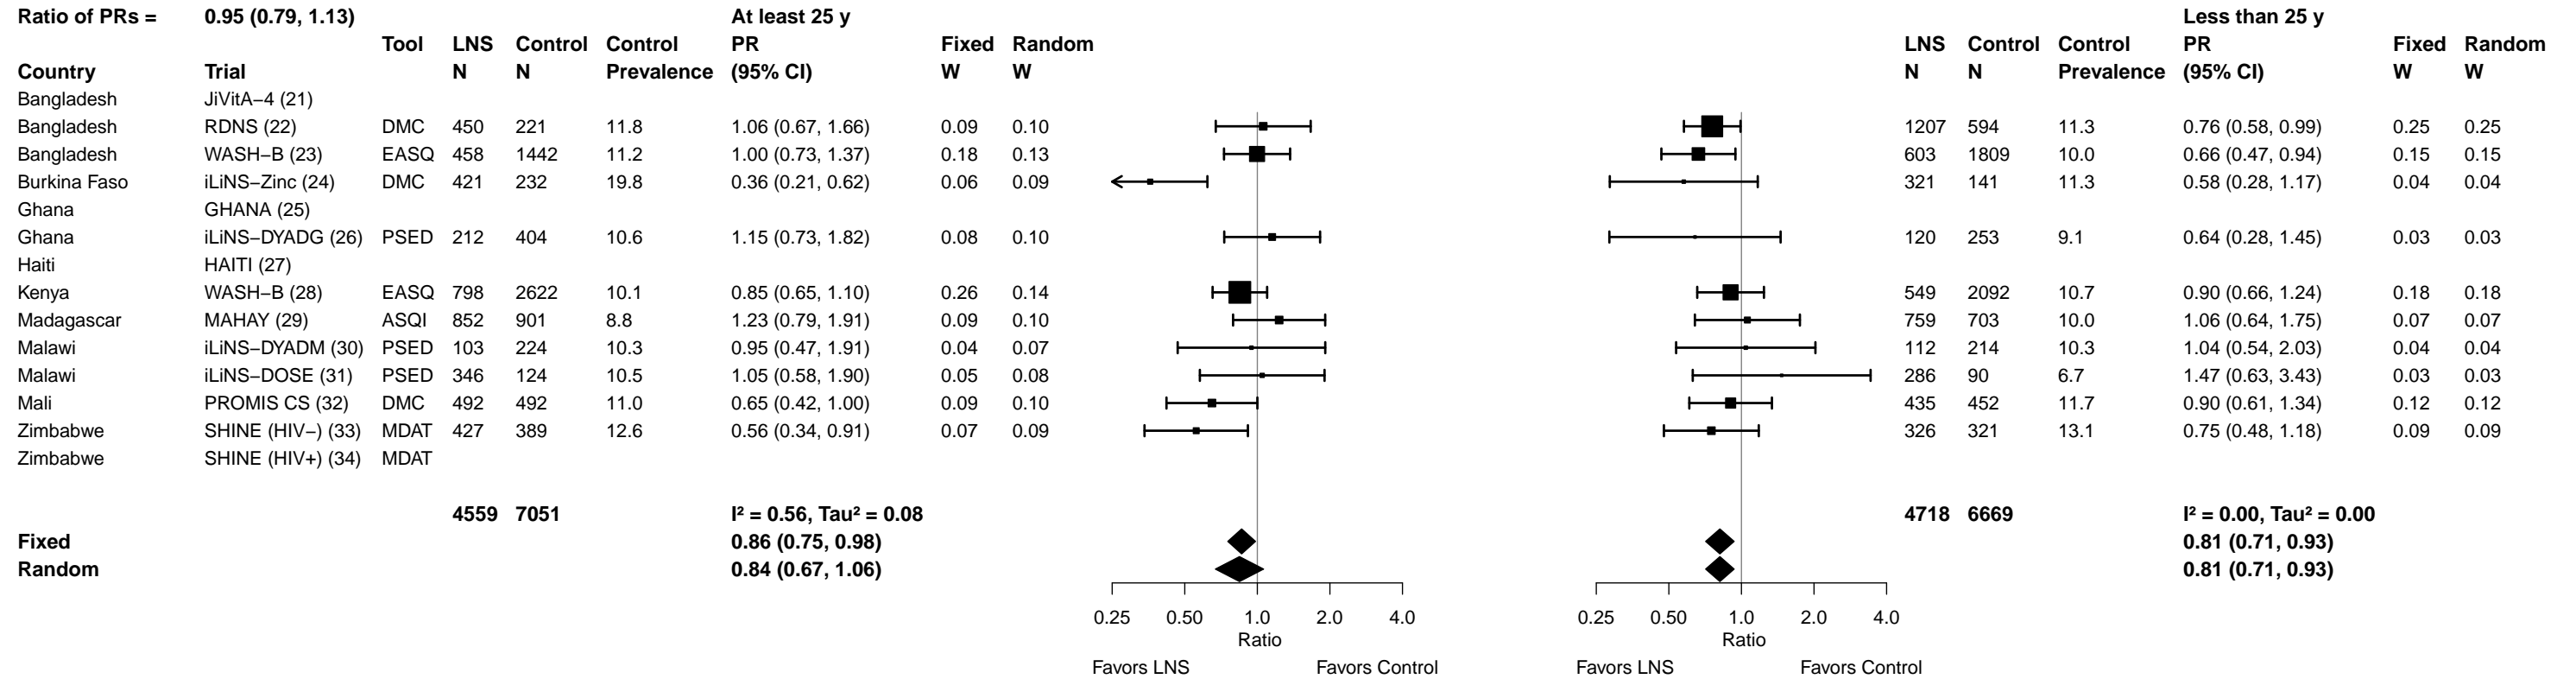

Supplemental figure 5E: Social-emotional lowest decile prevalence ratio

5E4: Stratified by Maternal education

**P-for-interaction = 0.638**  
**Ratio of PRs = 0.95 (0.76, 1.18)**

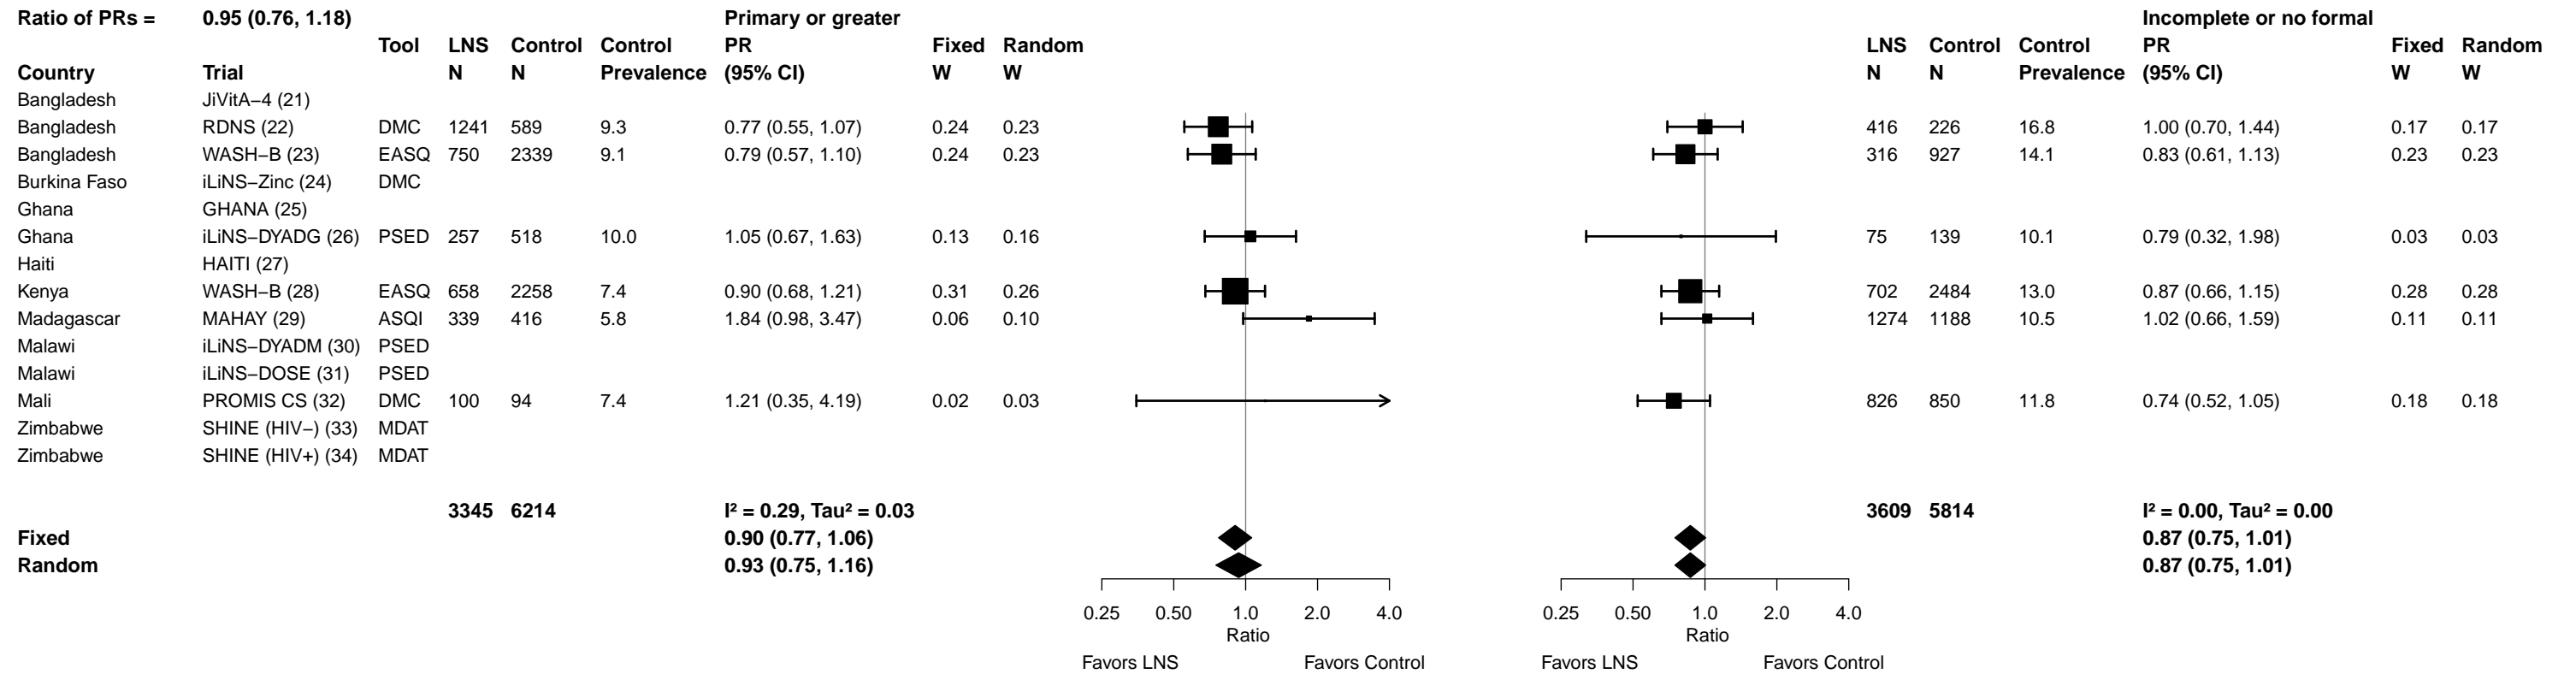

Supplemental figure 5E: Social-emotional lowest decile prevalence ratio

5E5: Stratified by Maternal depressive symptoms

P-for-interaction = 0.165

Ratio of PRs = 0.86 (0.69, 1.07)

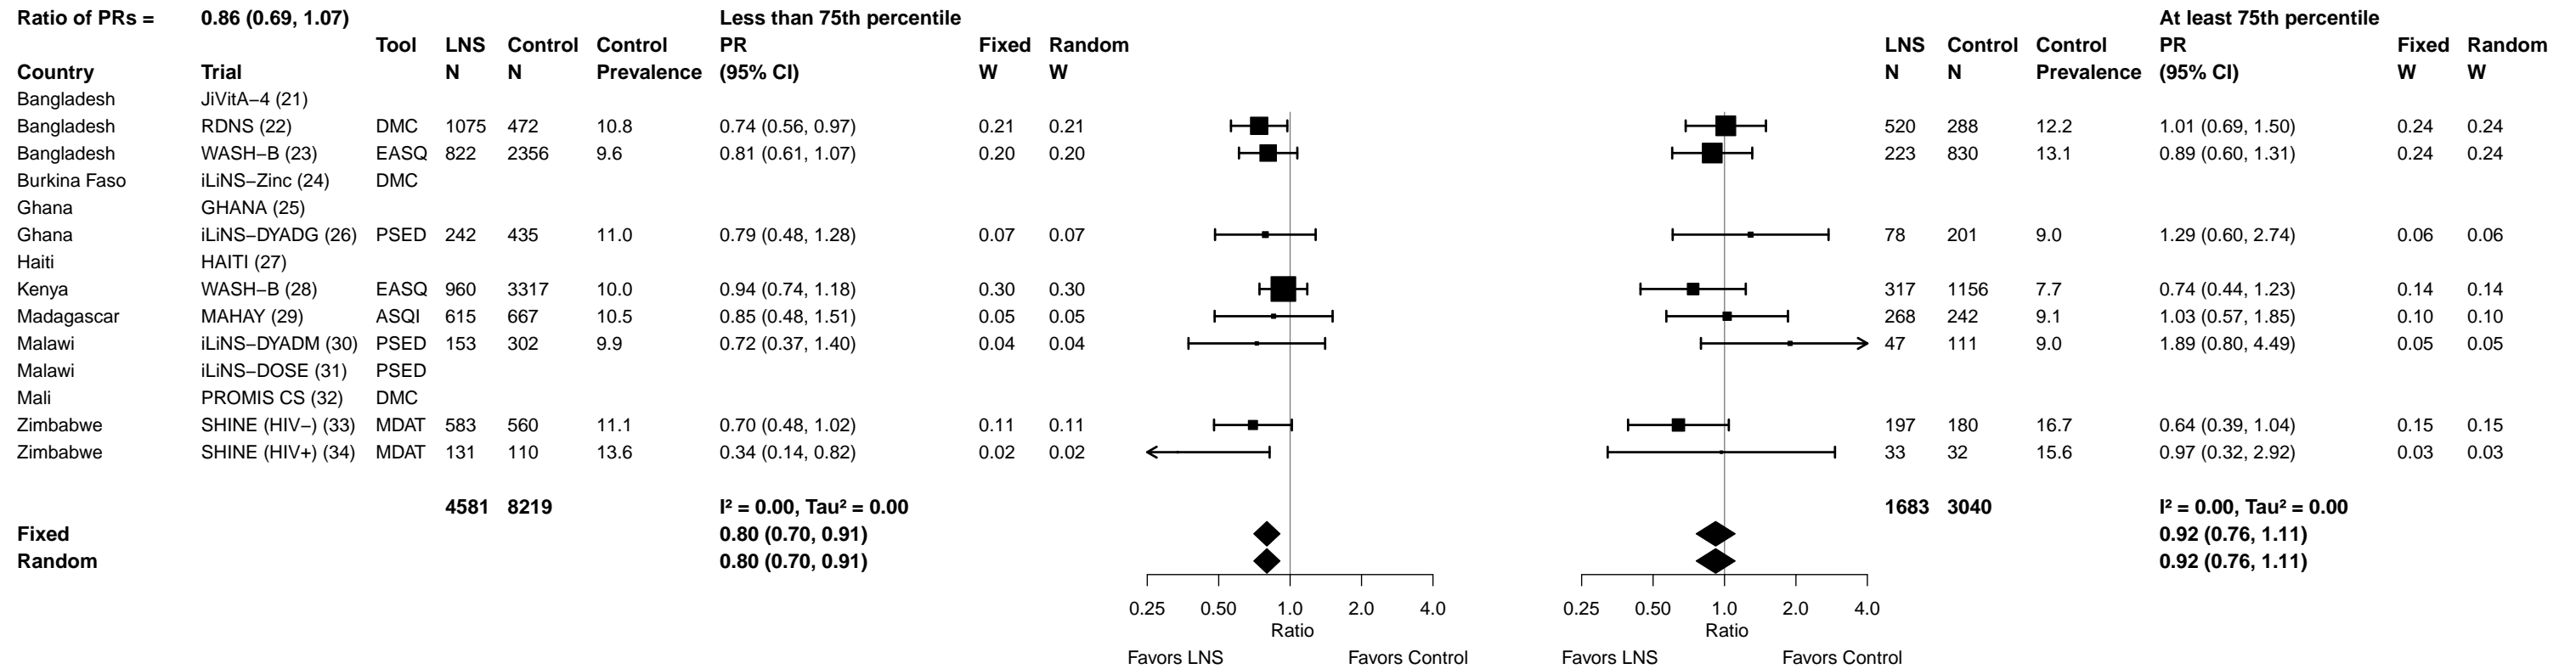

Supplemental figure 5E: Social-emotional lowest decile prevalence ratio

5E6: Stratified by Child sex

P-for-interaction = 0.757  
 Ratio of PRs = 1.03 (0.87, 1.21)

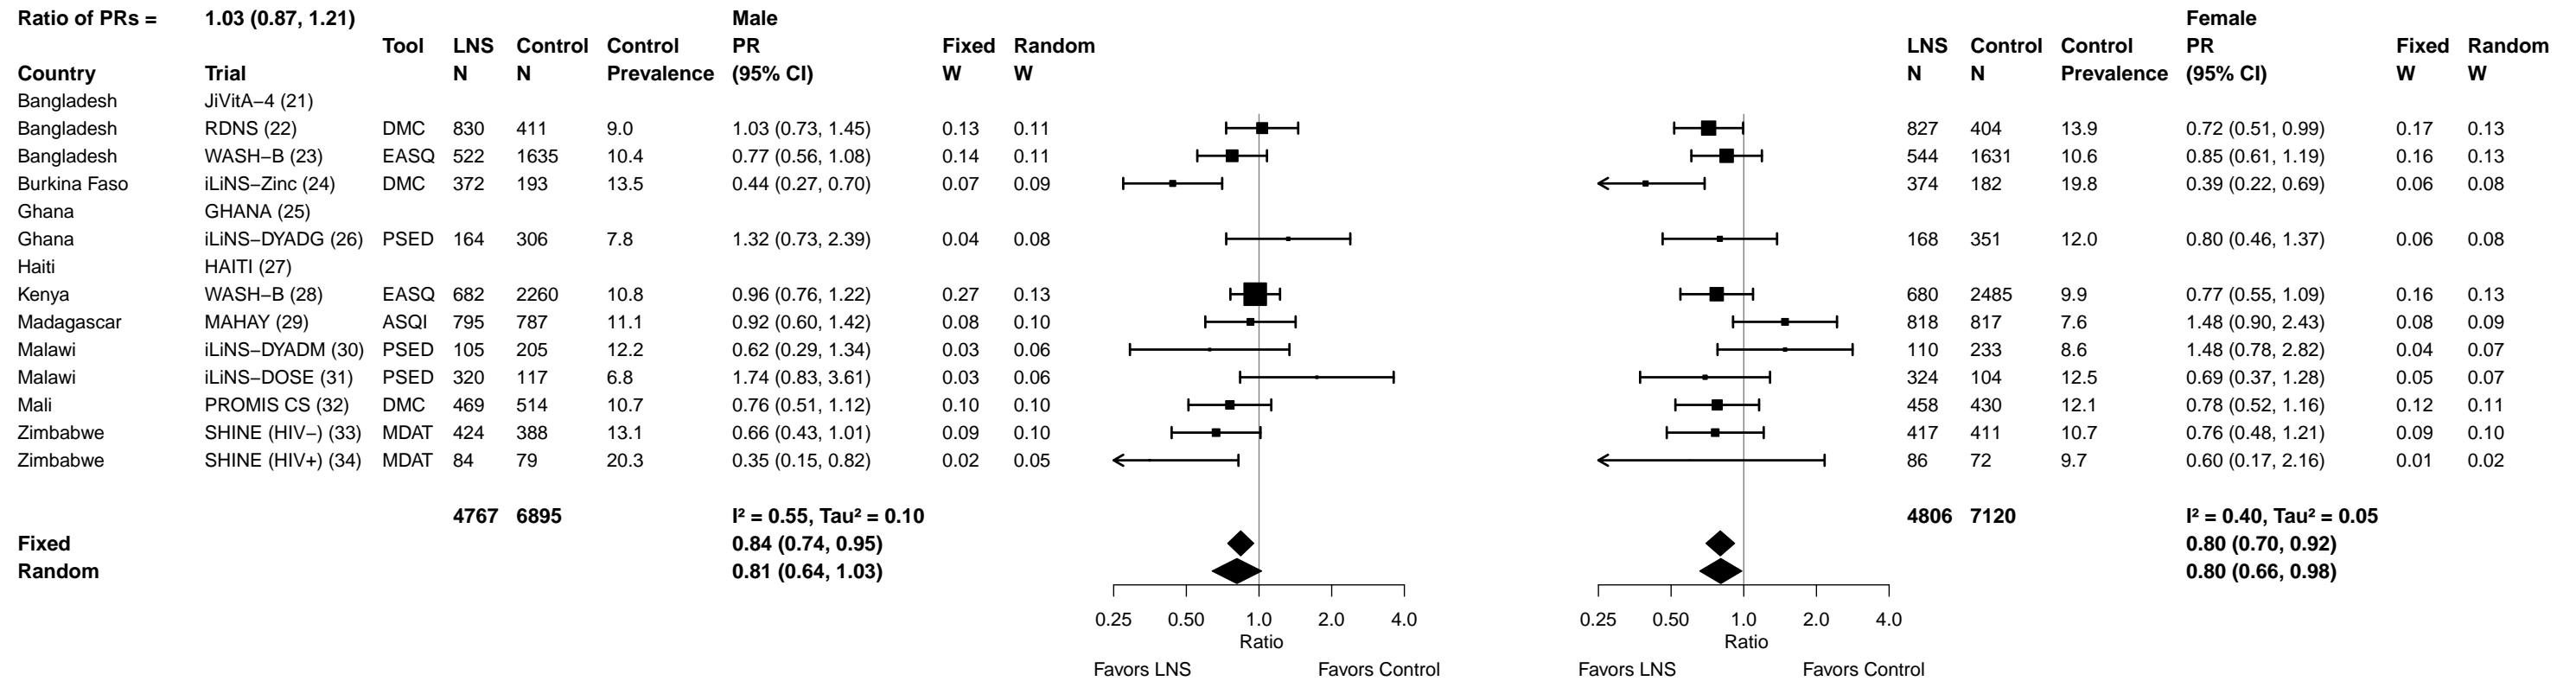

Supplemental figure 5E: Social-emotional lowest decile prevalence ratio

5E7: Stratified by Child birth order

P-for-interaction = 0.920  
 Ratio of PRs = 1.01 (0.83, 1.24)

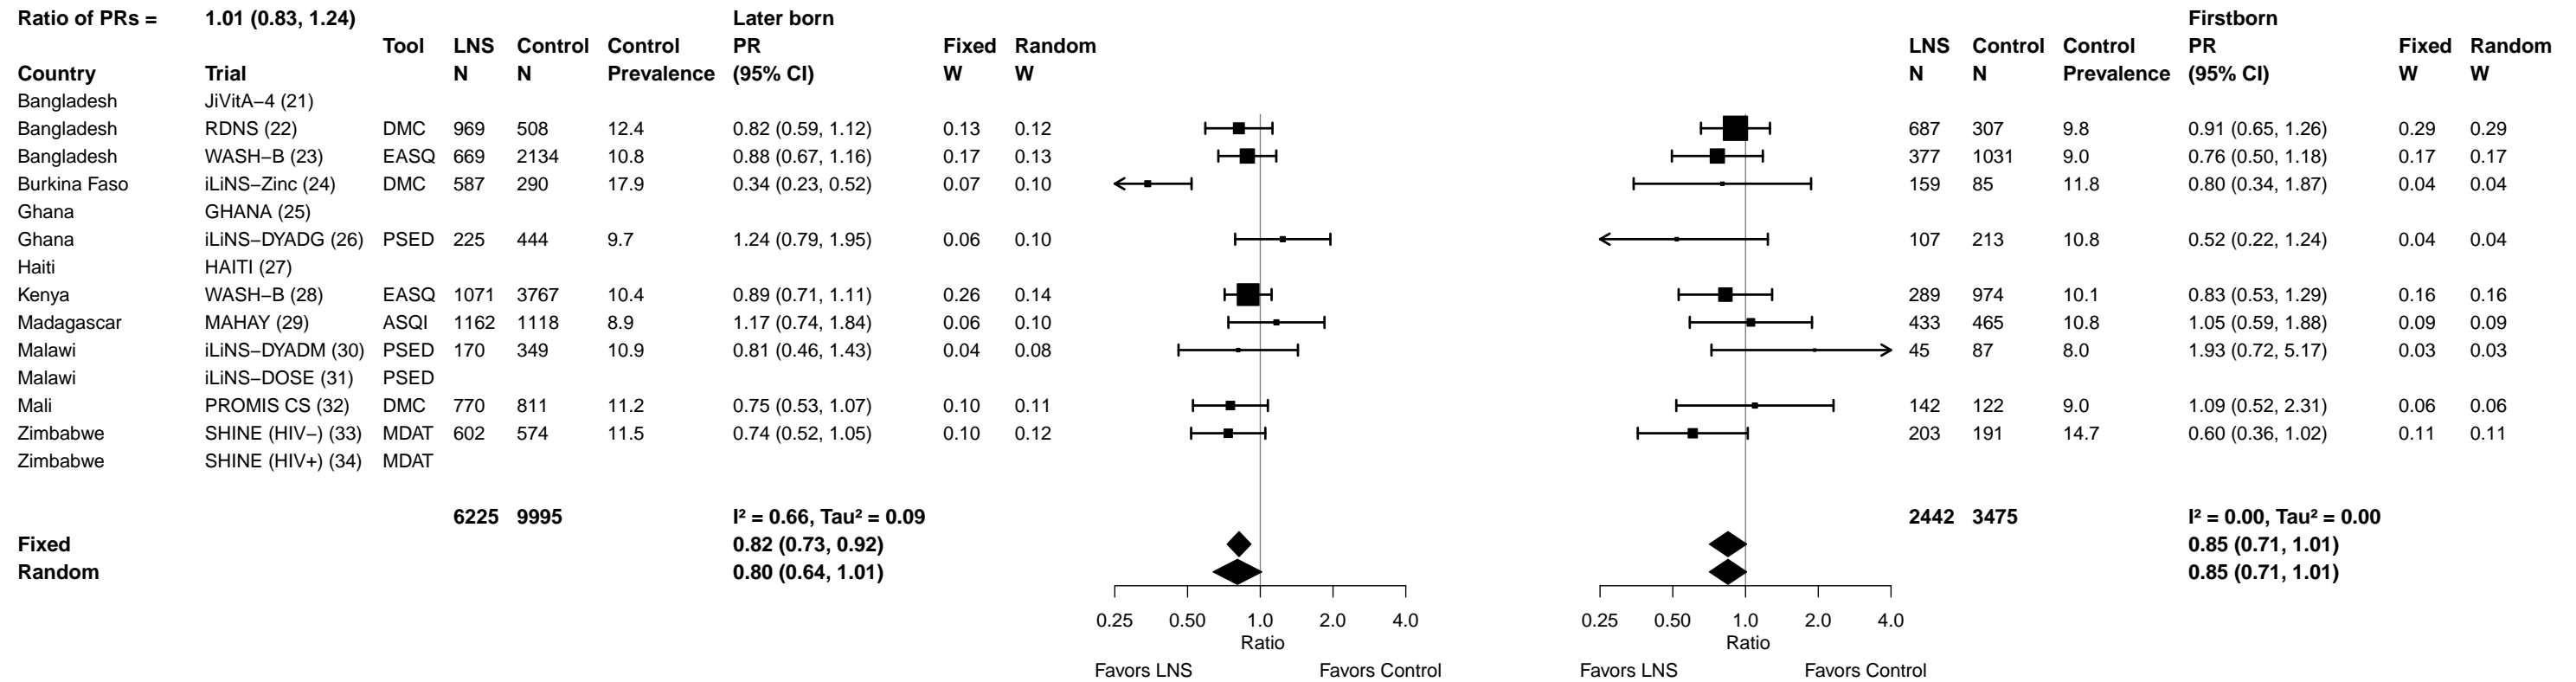



Supplemental figure 5E: Social-emotional lowest decile prevalence ratio

5E8: Stratified by Child baseline stunting

P-for-interaction = 0.728  
 Ratio of PRs = 0.94 (0.67, 1.32)

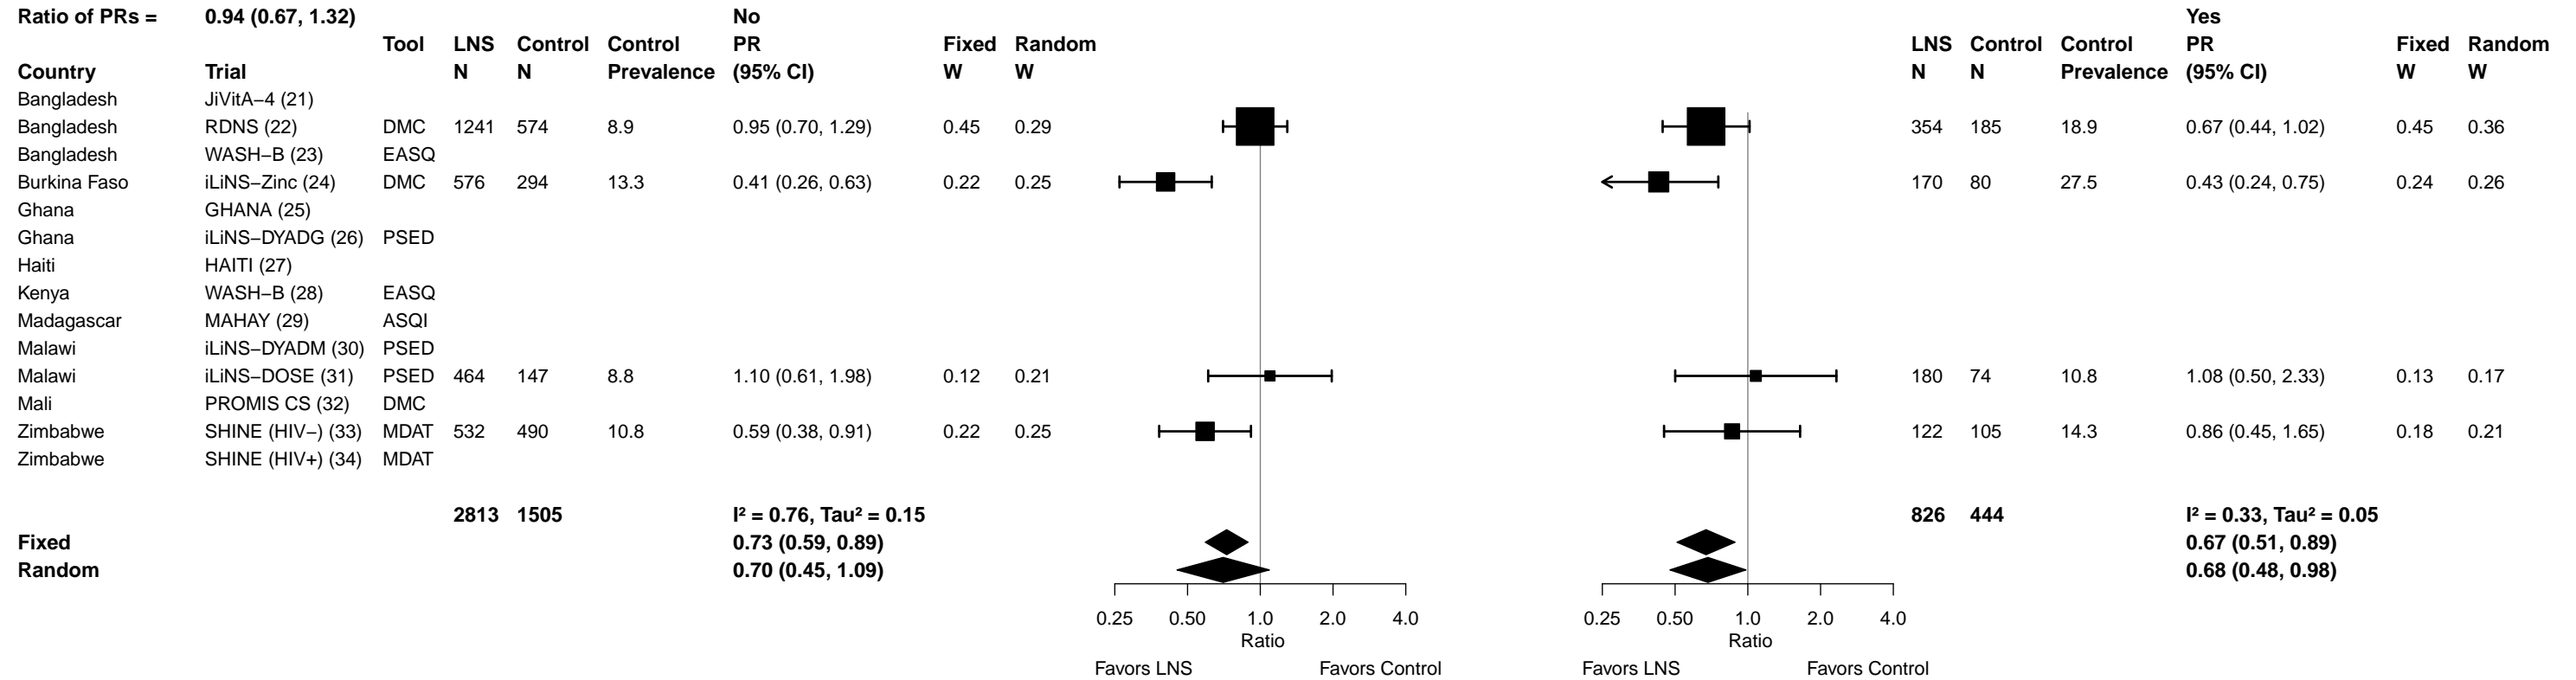

**Supplemental figure 5E: Social-emotional lowest decile prevalence ratio**

**5E9: Stratified by Child baseline acute malnutrition (insufficient comparisons)**

Supplemental figure 5E: Social-emotional lowest decile prevalence ratio

5E10: Stratified by Child baseline anemia

**P-for-interaction = 0.881**  
**Ratio of PRs = 1.04 (0.63, 1.70)**

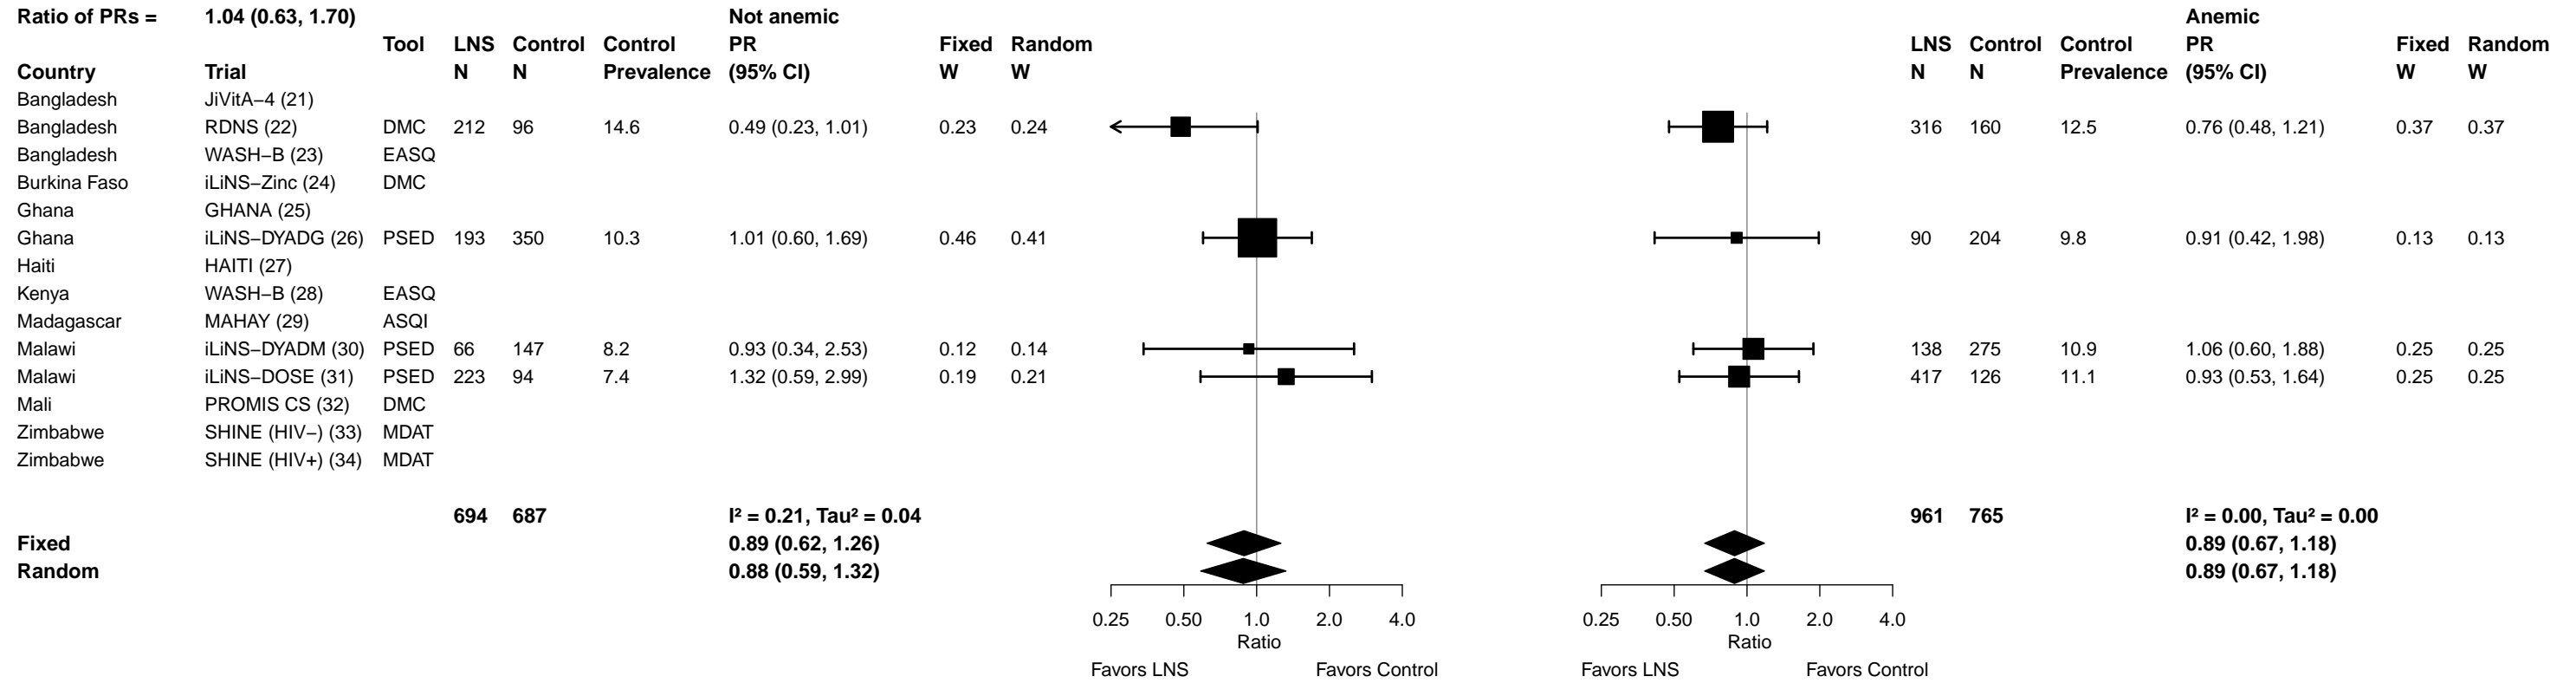

### Supplemental figure 5F: Social-emotional lowest decile prevalence difference

#### 5F1: Stratified by Maternal height

P-for-interaction = 0.920  
 Difference in PDs = 0.00 (-0.02, 0.03)

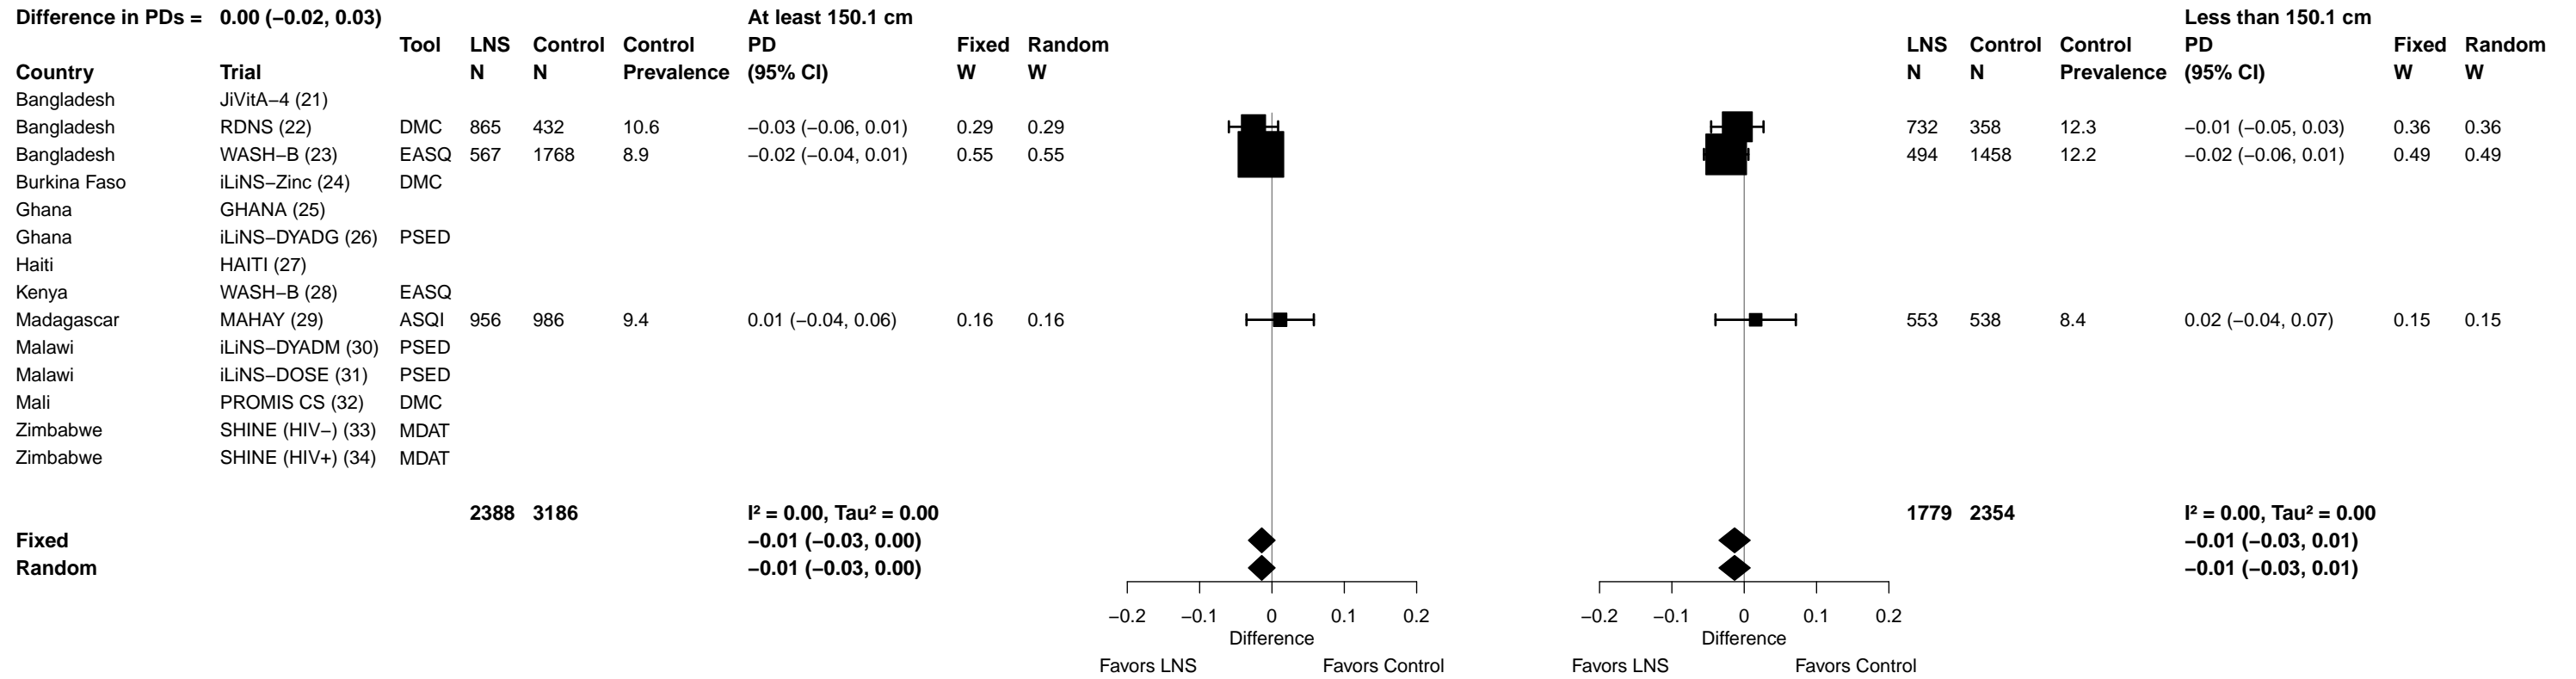

Supplemental figure 5F: Social-emotional lowest decile prevalence difference

5F2: Stratified by Maternal BMI

P-for-interaction = 0.455  
 Difference in PDs = 0.01 (-0.01, 0.03)

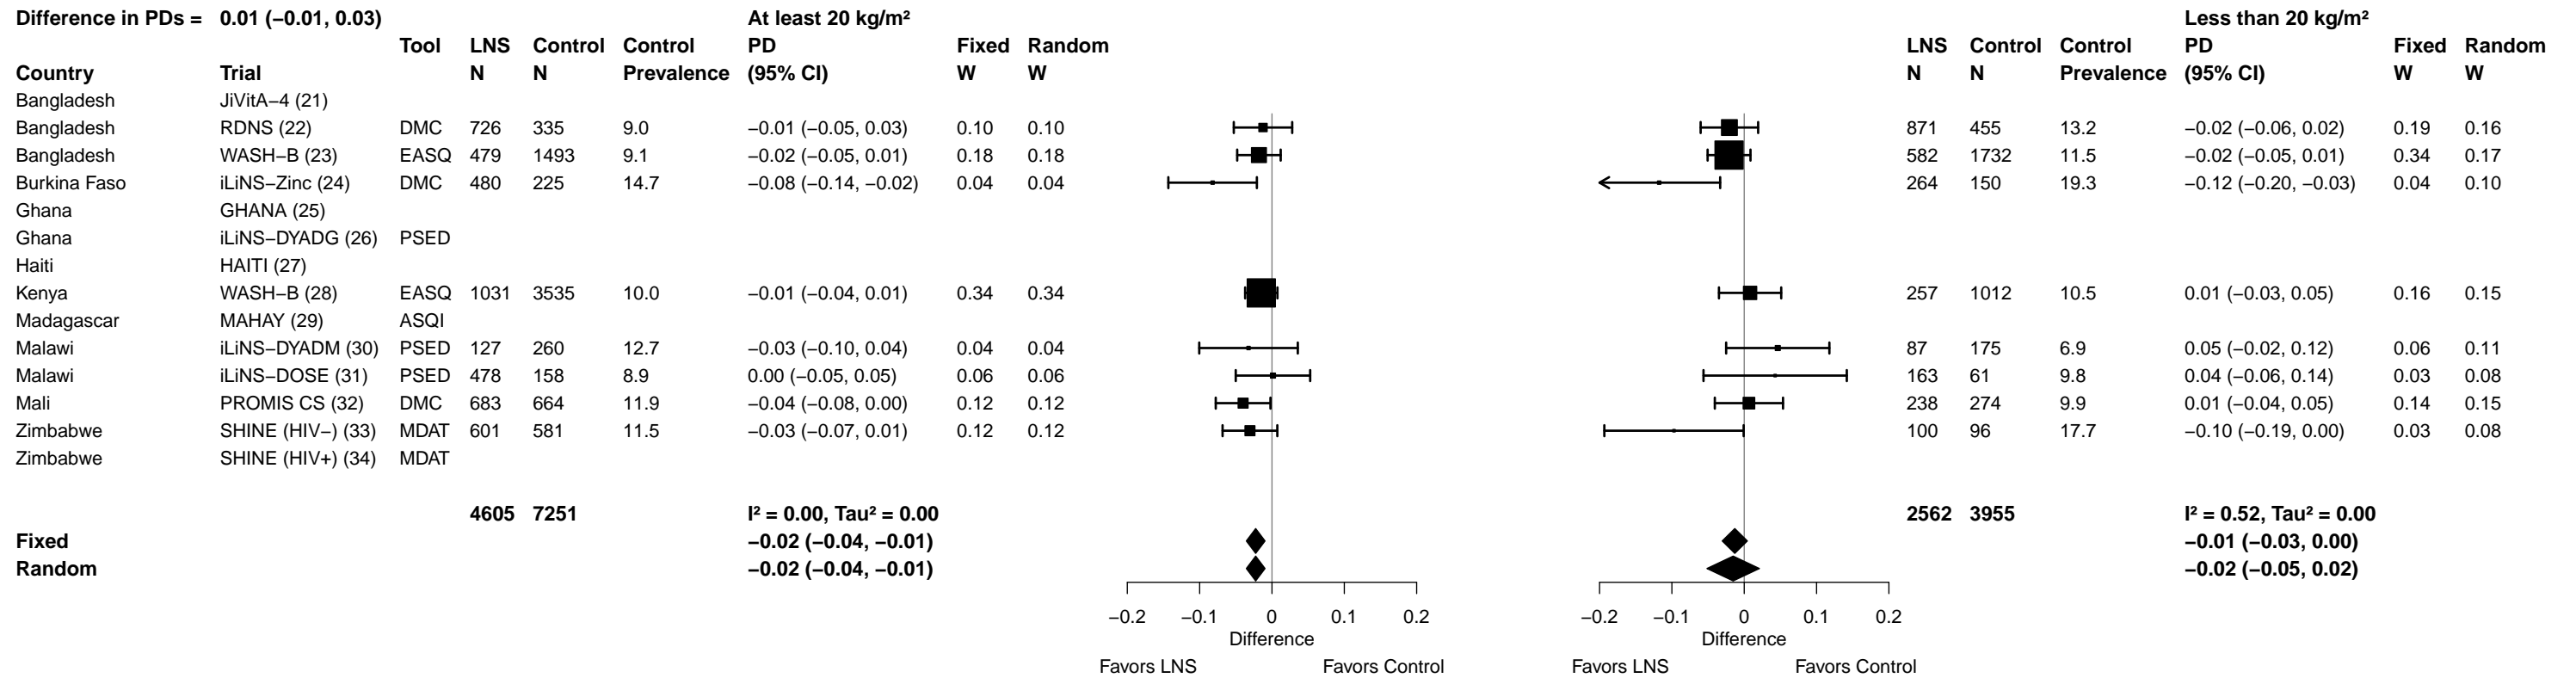

Supplemental figure 5F: Social-emotional lowest decile prevalence difference

5F3: Stratified by Maternal age

P-for-interaction = 0.701  
 Difference in PDs = 0.00 (-0.02, 0.01)

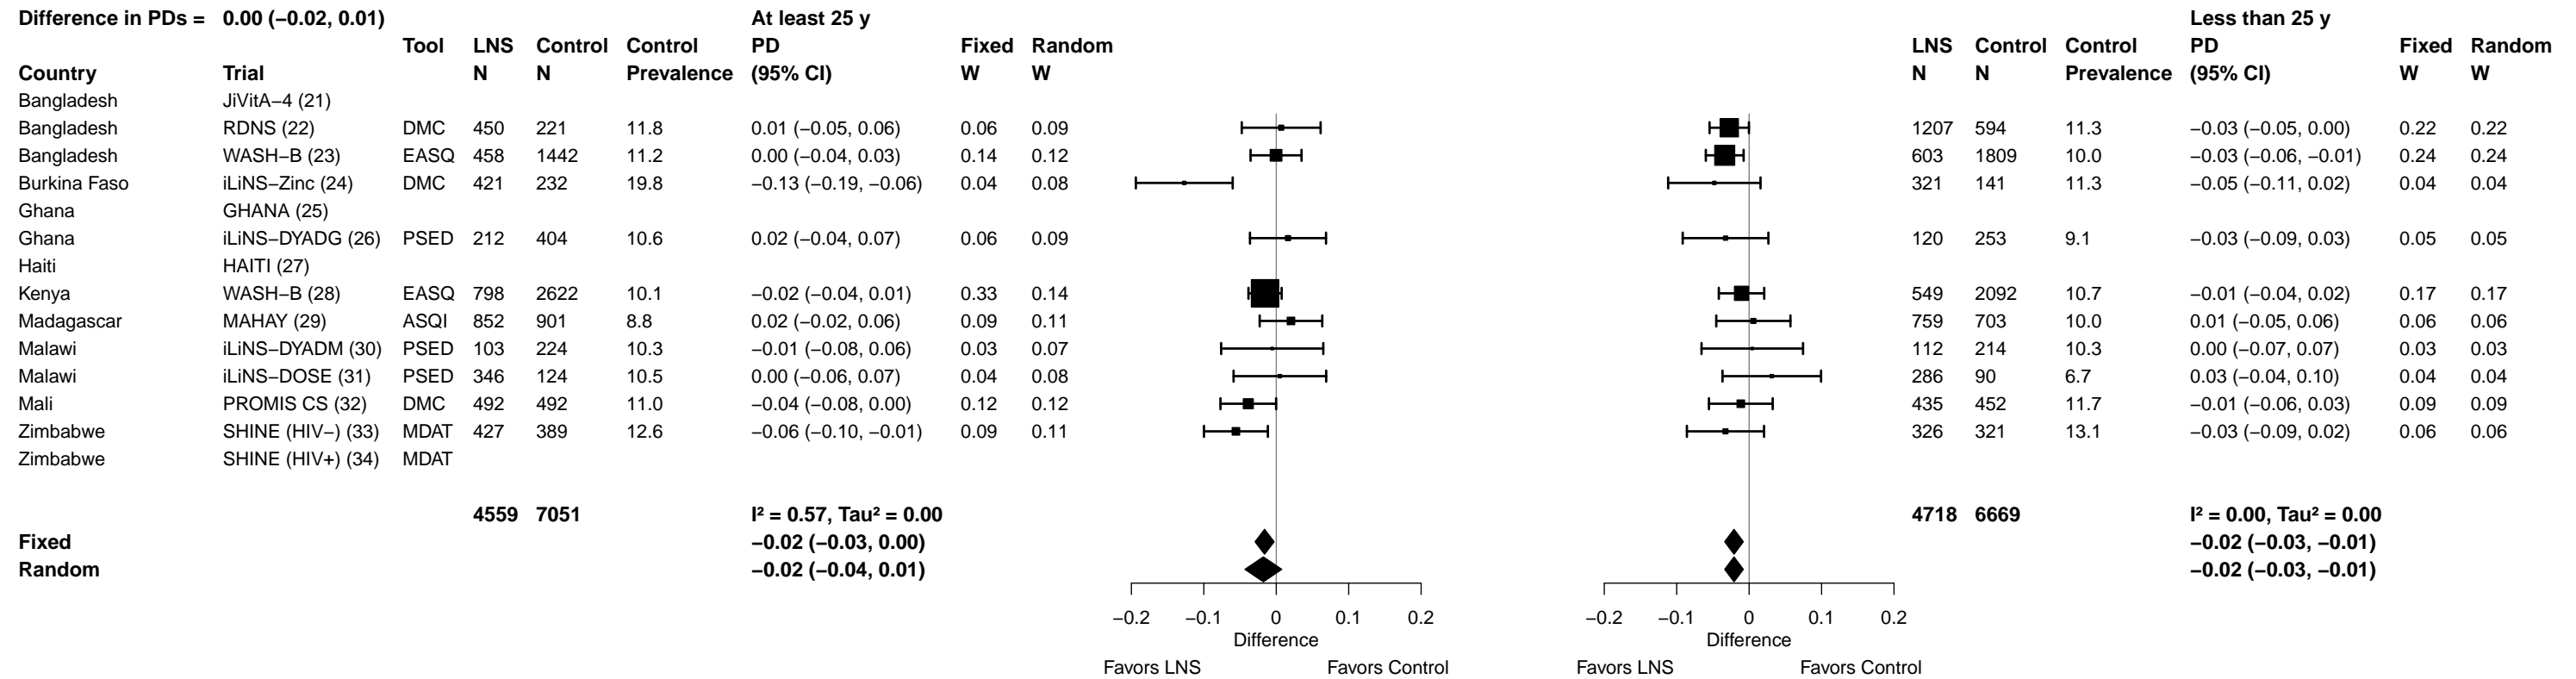

Supplemental figure 5F: Social-emotional lowest decile prevalence difference

5F4: Stratified by Maternal education

**P-for-interaction = 0.125**  
**Difference in PDs = -0.02 (-0.04, 0.00)**

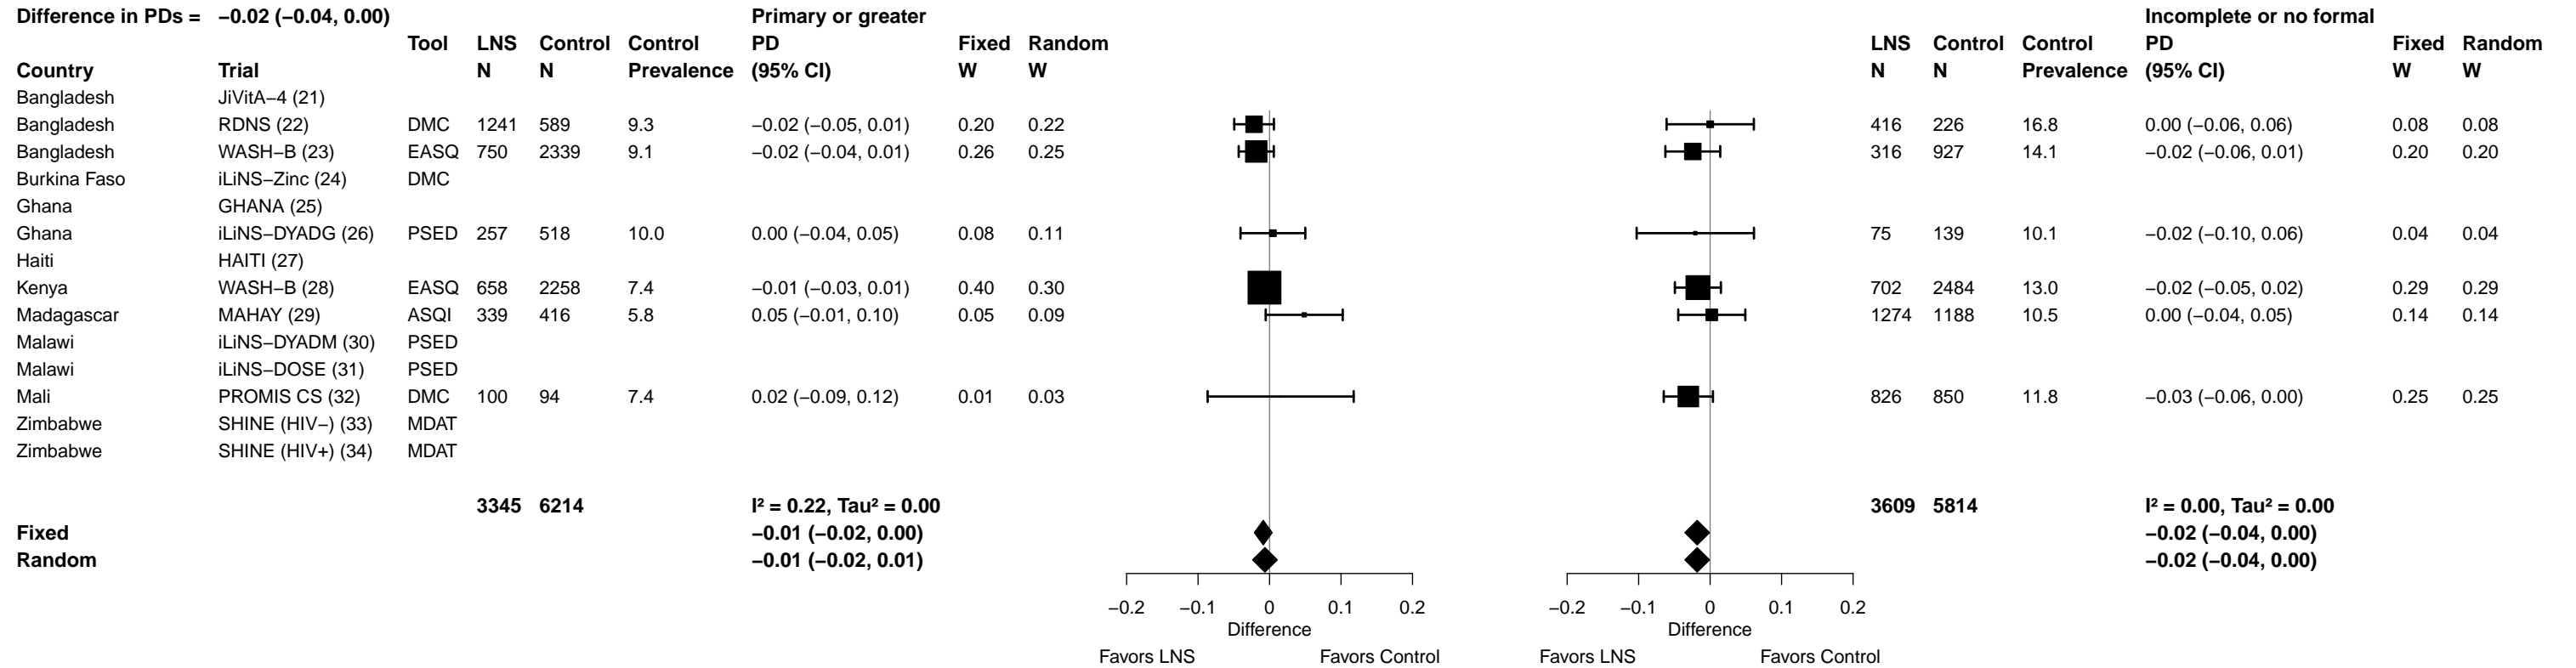

Supplemental figure 5F: Social-emotional lowest decile prevalence difference

5F5: Stratified by Maternal depressive symptoms

P-for-interaction = 0.525

Difference in PDs = -0.01 (-0.03, 0.01)

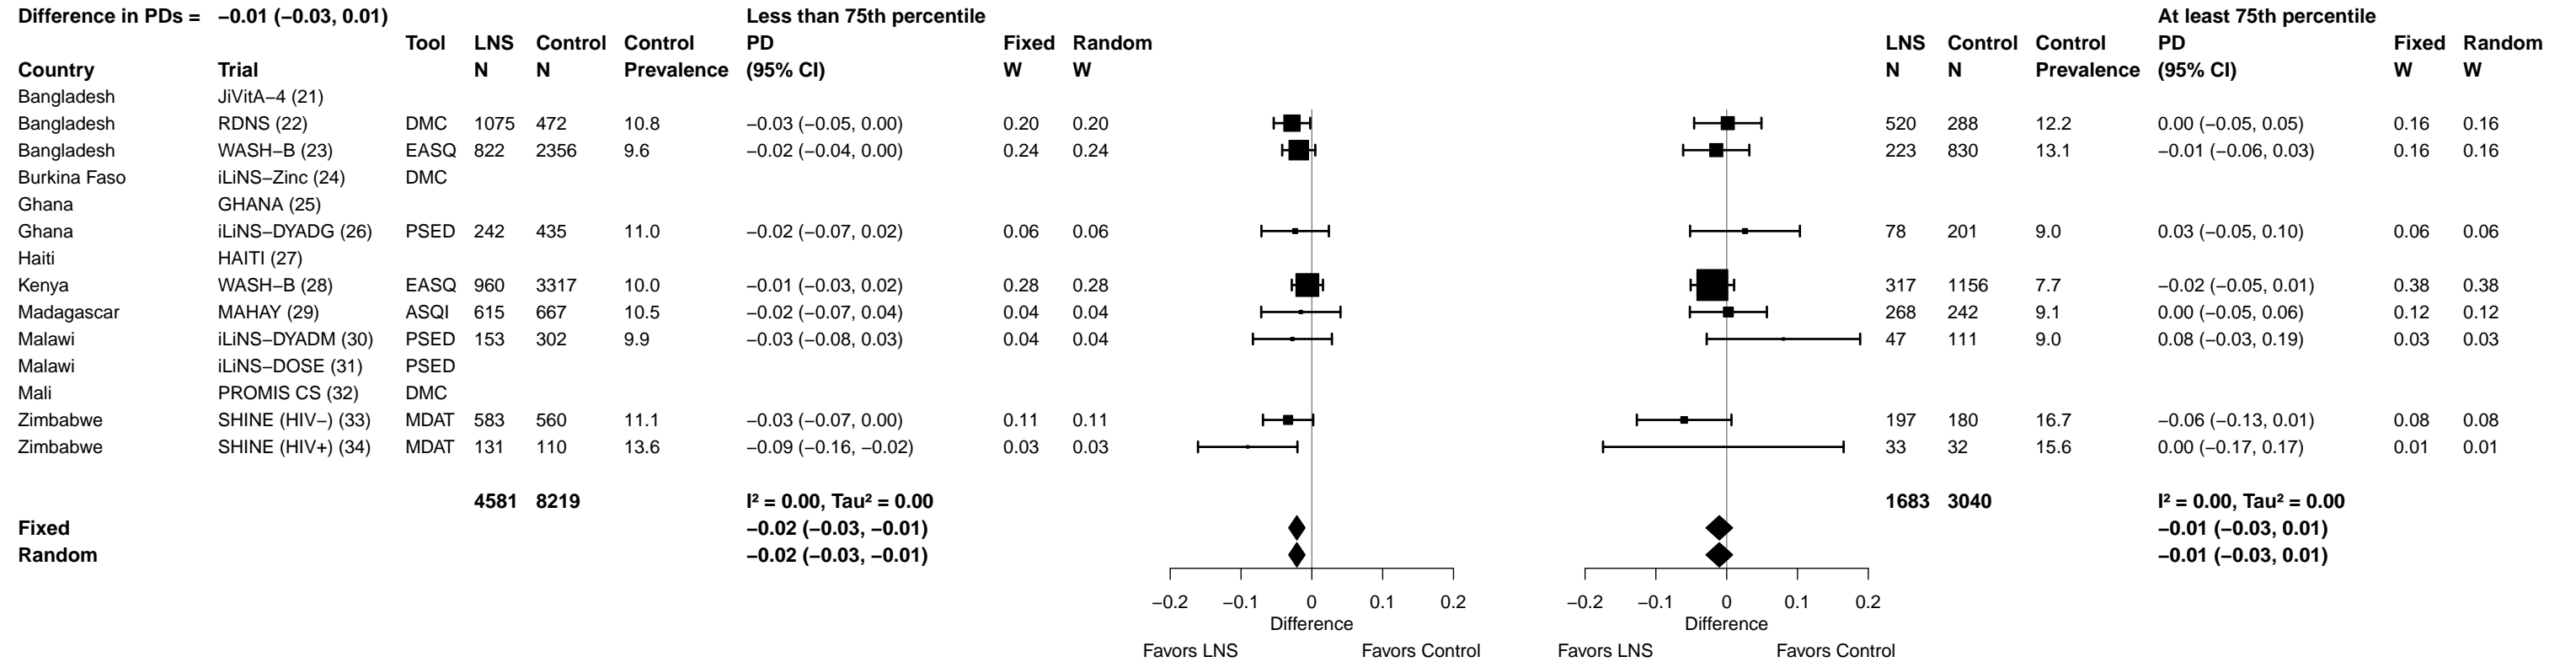



Supplemental figure 5F: Social-emotional lowest decile prevalence difference

5F6: Stratified by Child sex

P-for-interaction = 0.852  
 Difference in PDs = 0.00 (-0.02, 0.02)

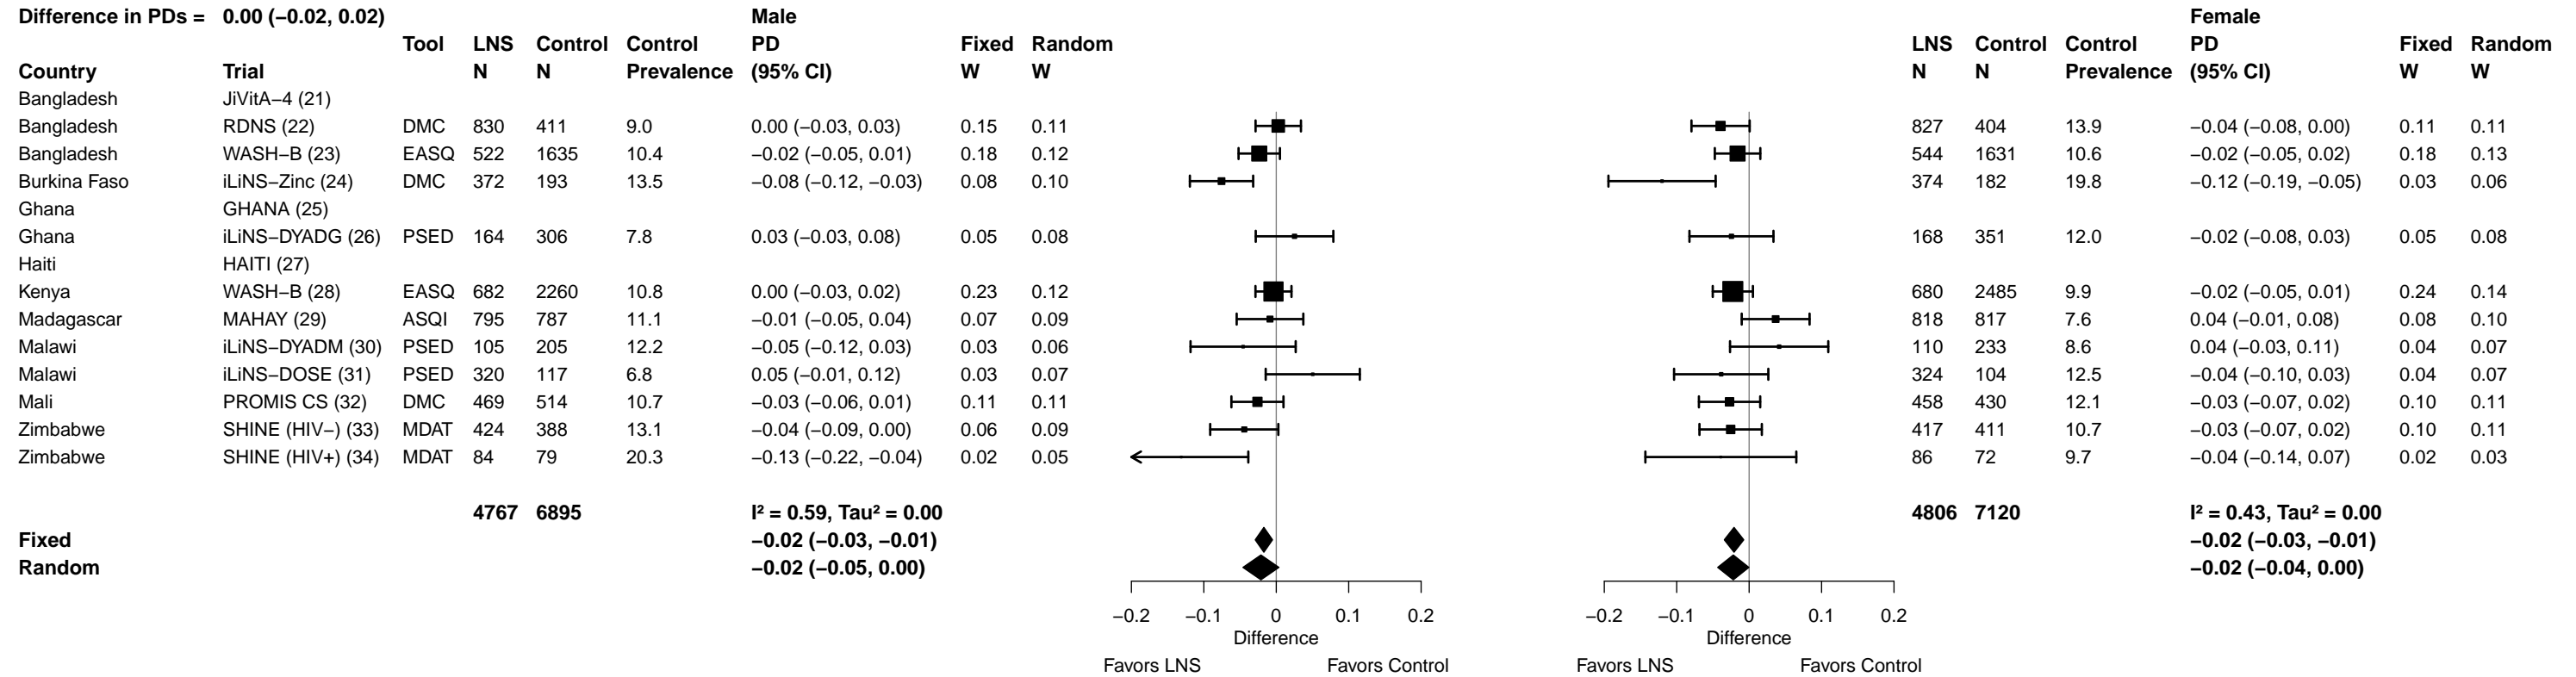

Supplemental figure 5F: Social-emotional lowest decile prevalence difference

5F7: Stratified by Child birth order

P-for-interaction = 0.909  
 Difference in PDs = 0.00 (-0.02, 0.02)

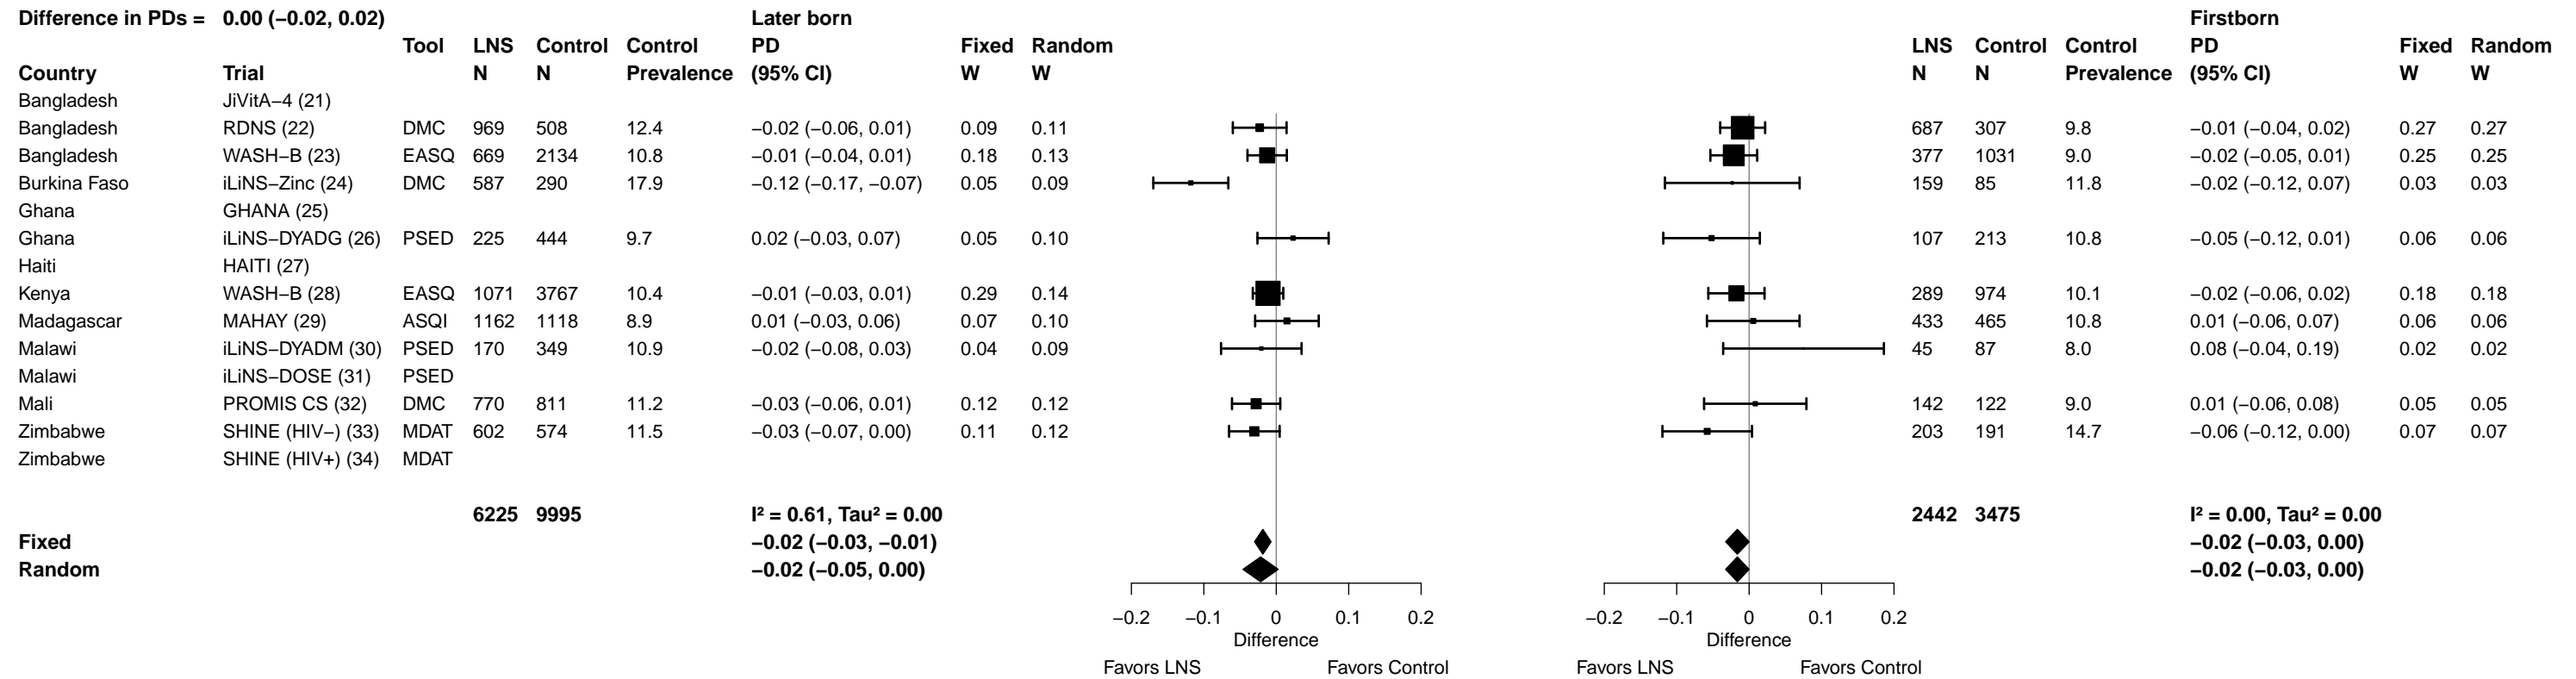

Supplemental figure 5F: Social-emotional lowest decile prevalence difference

5F8: Stratified by Child baseline stunting

P-for-interaction = 0.202

Difference in PDs = -0.03 (-0.08, 0.02)

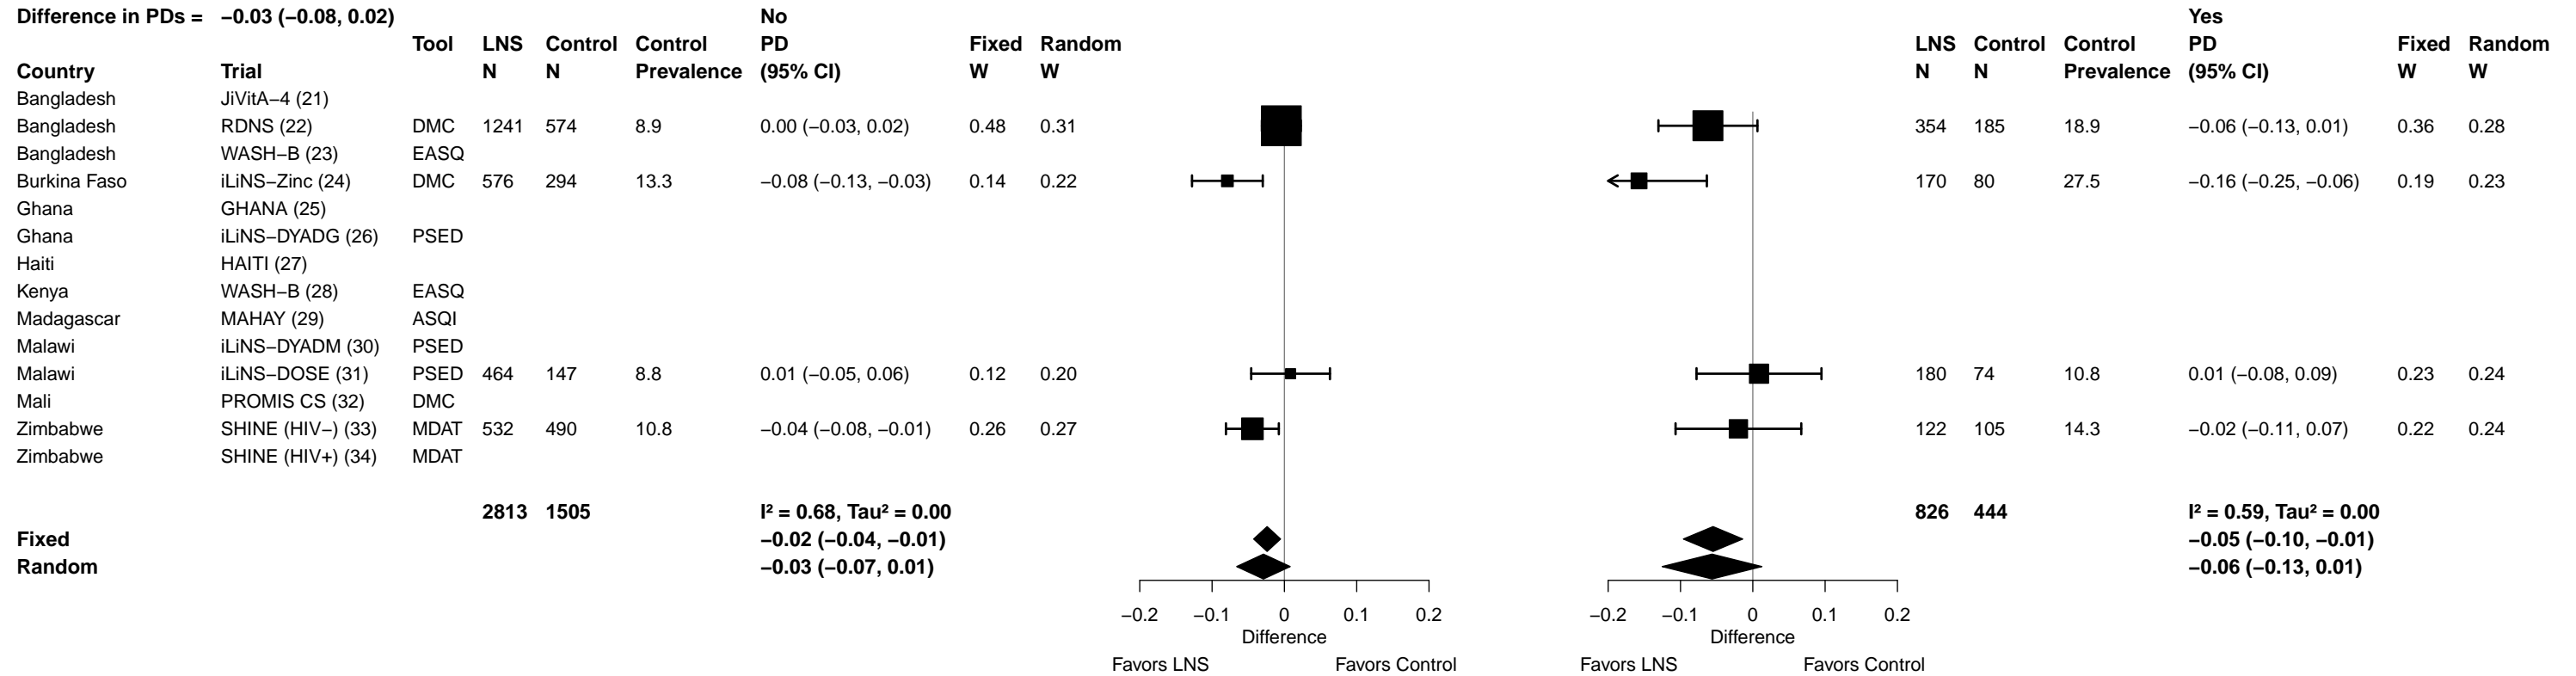

**Supplemental figure 5F: Social-emotional lowest decile prevalence difference**

**5F9: Stratified by Child baseline acute malnutrition (insufficient comparisons)**

Supplemental figure 5F: Social-emotional lowest decile prevalence difference

5F10: Stratified by Child baseline anemia

P-for-interaction = 0.952  
 Difference in PDs = 0.00 (-0.05, 0.05)

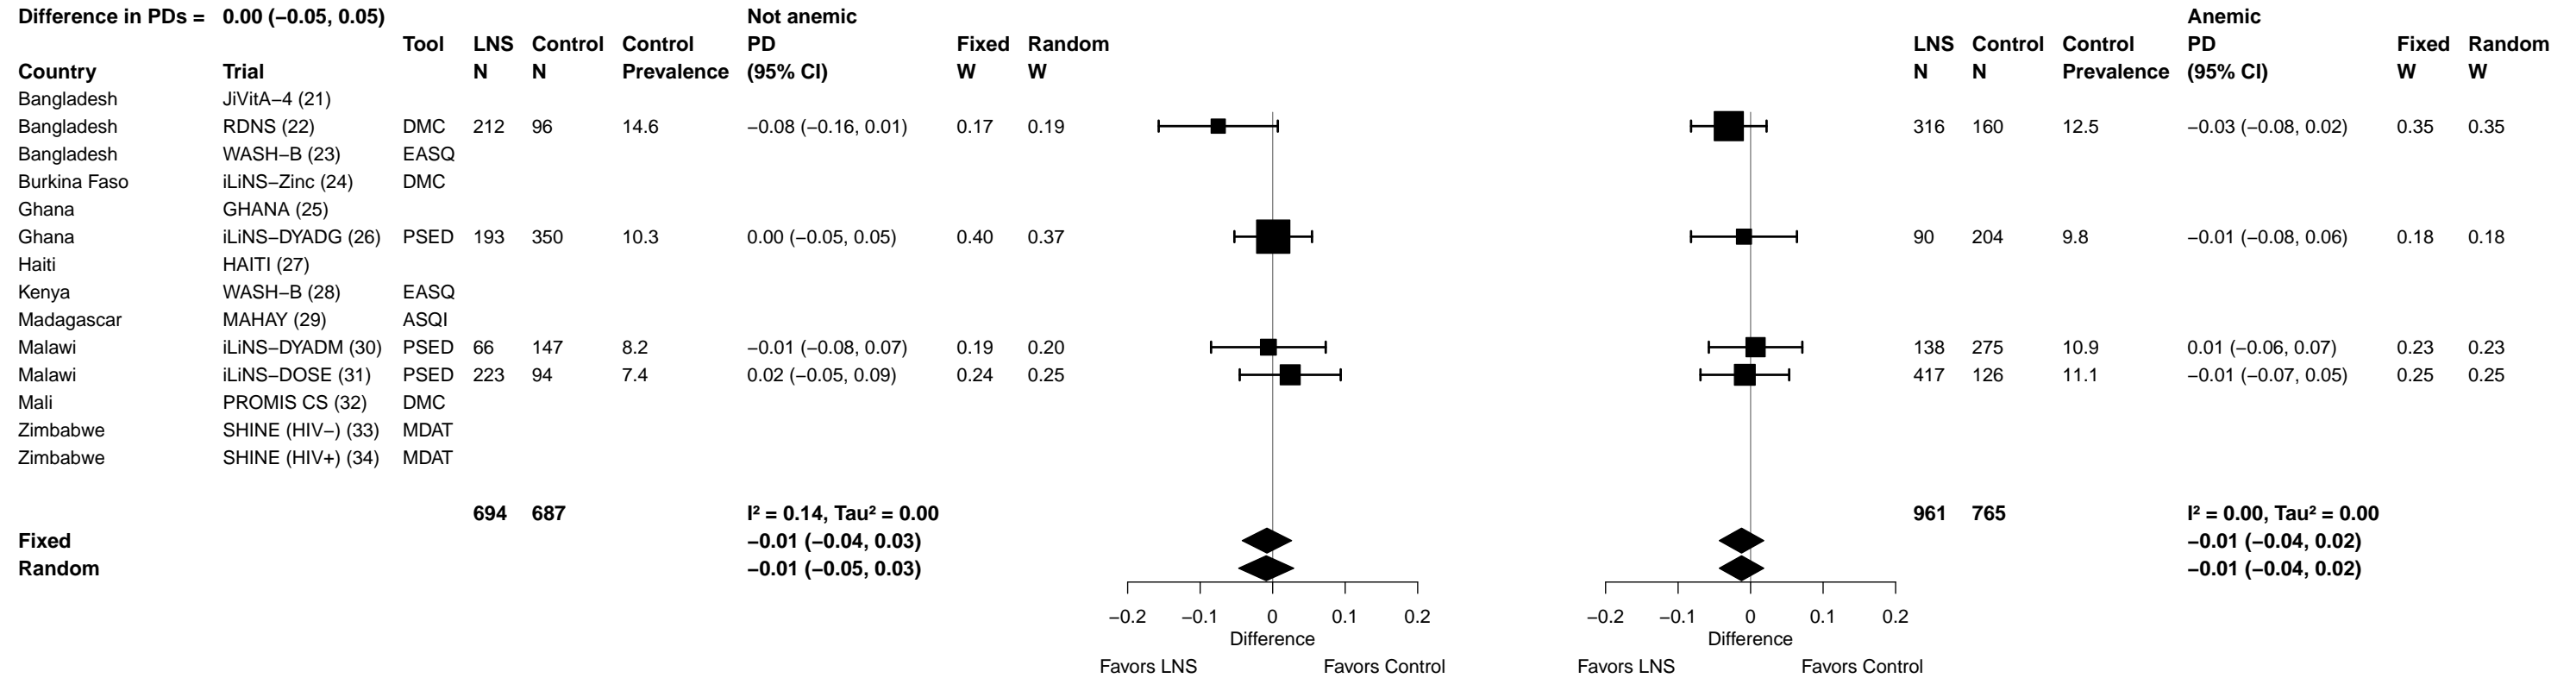

### Supplemental figure 5G: Mean difference in motor z-score

#### 5G1: Stratified by Maternal height

P-for-interaction = 0.457

Difference in MDs = -0.03 (-0.10, 0.05)

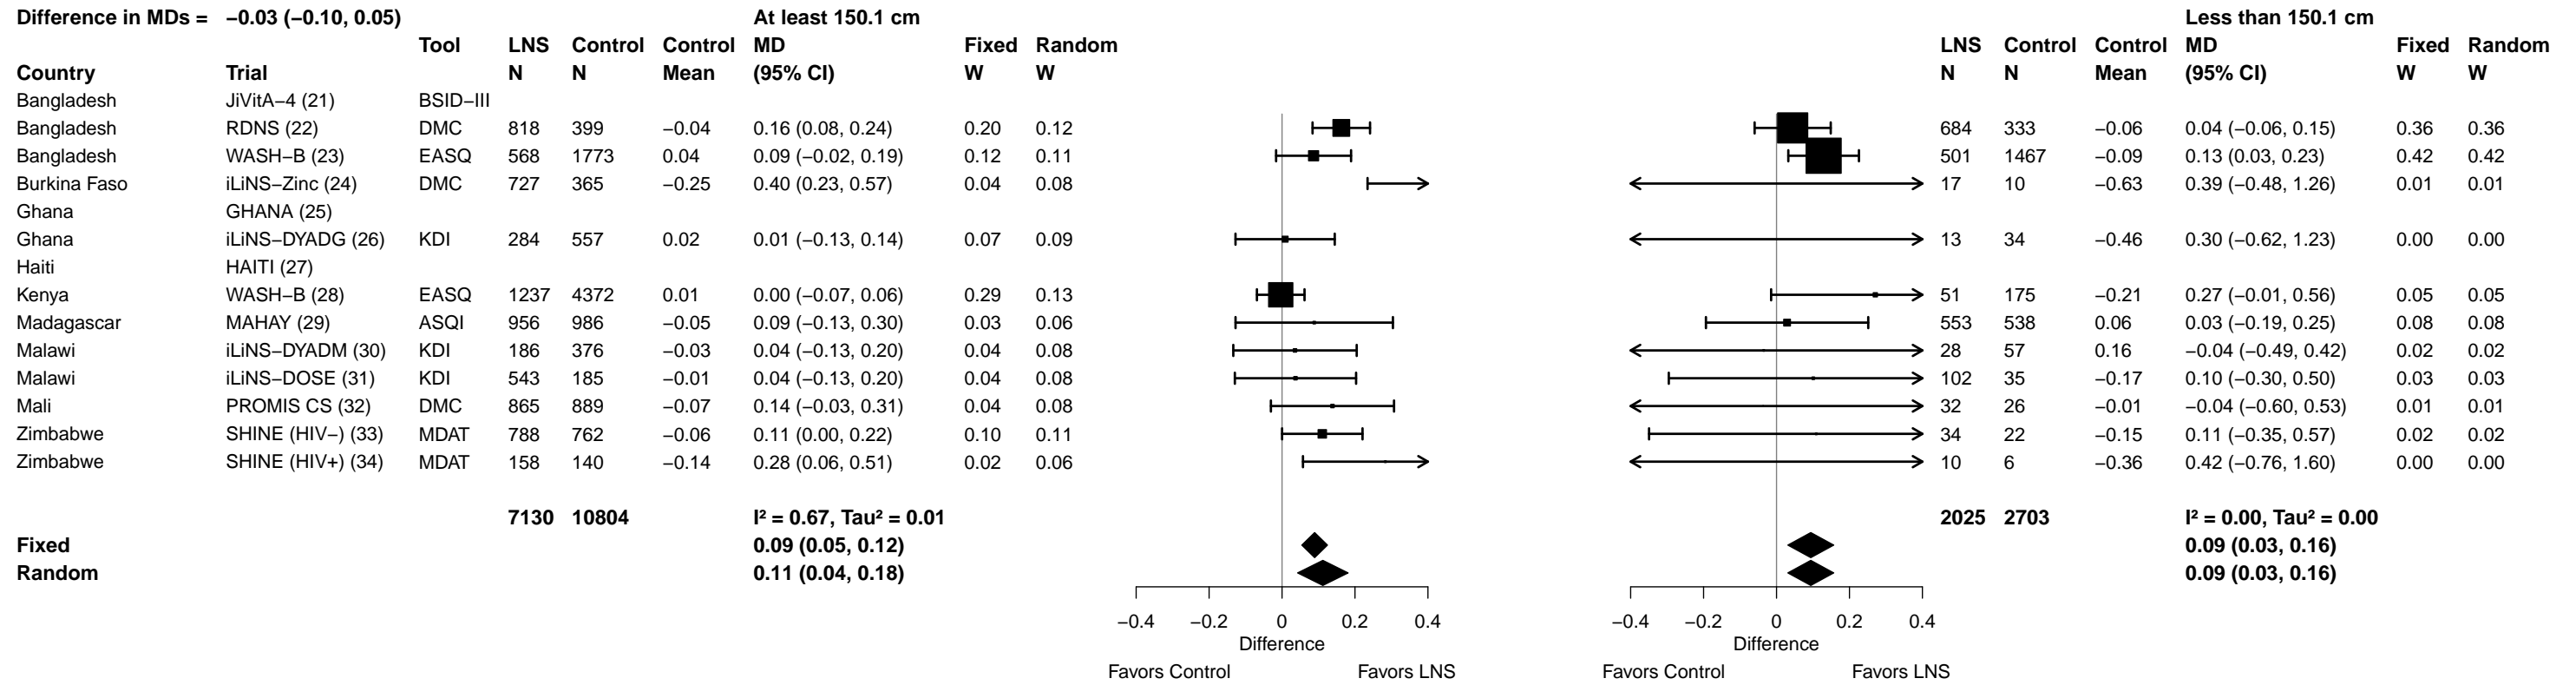

Supplemental figure 5G: Mean difference in motor z-score

5G2: Stratified by Maternal BMI

P-for-interaction = 0.553  
 Difference in MDs = 0.02 (-0.05, 0.09)

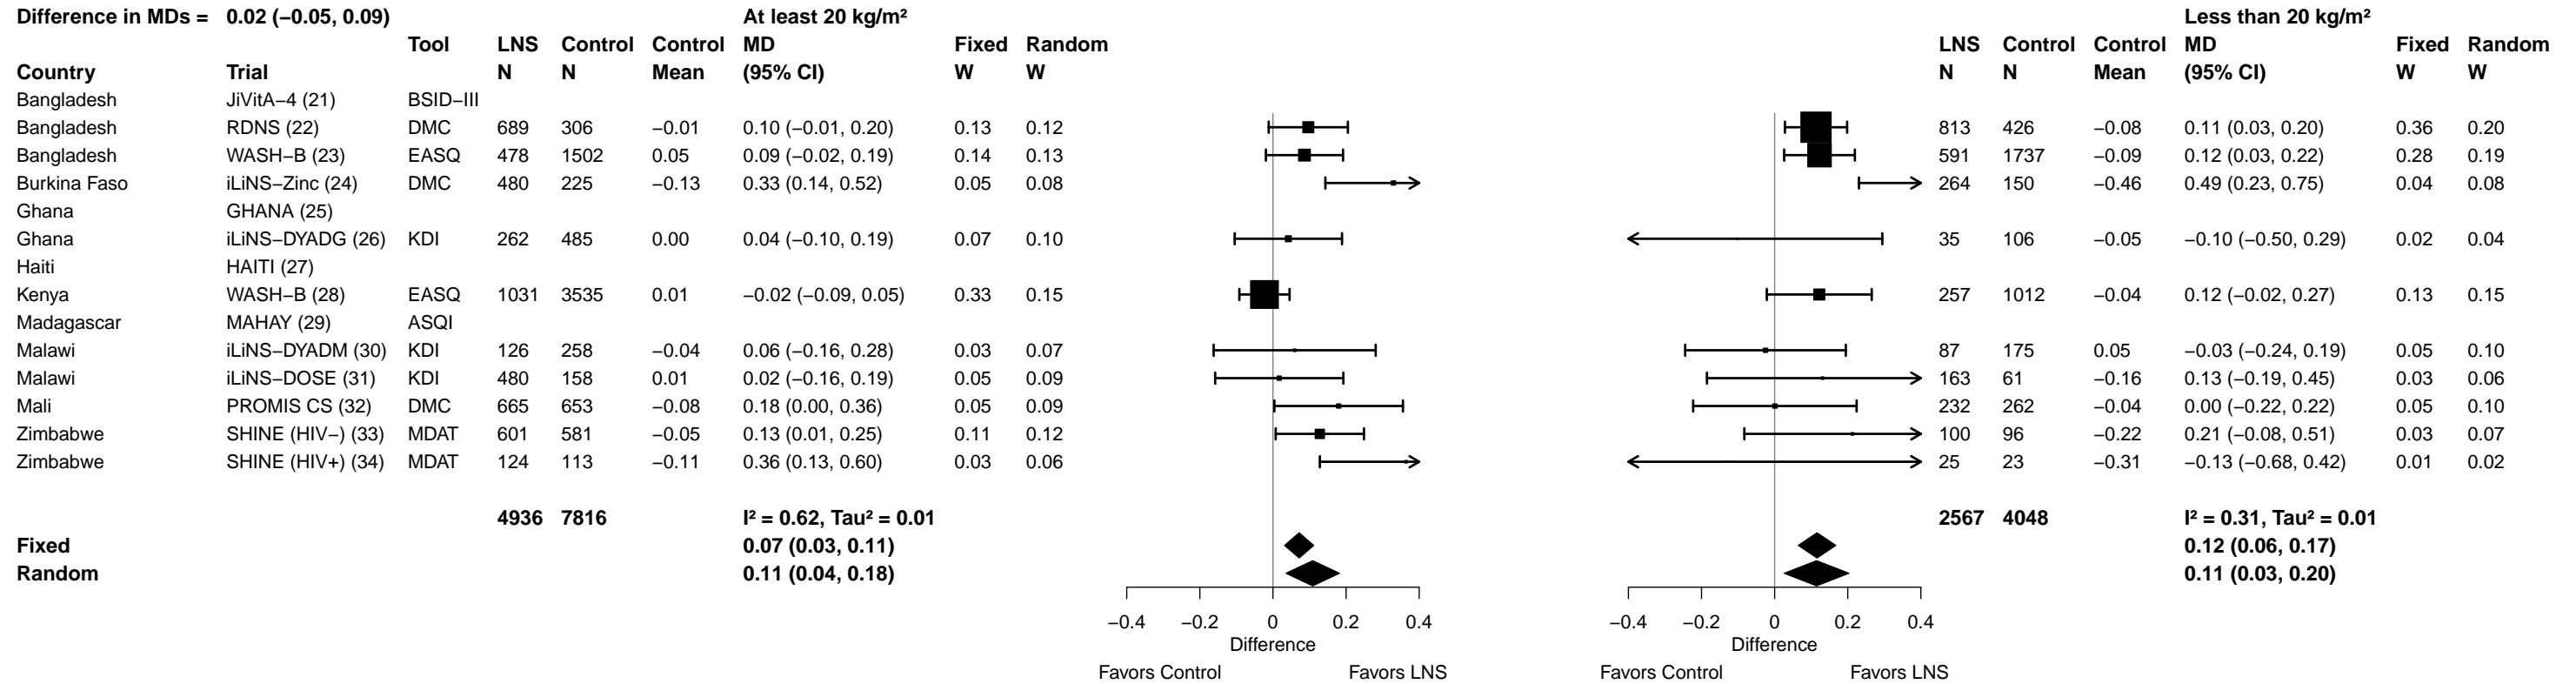

Supplemental figure 5G: Mean difference in motor z-score

5G3: Stratified by Maternal age

P-for-interaction = 0.043

Difference in MDs = -0.06 (-0.11, 0.00)

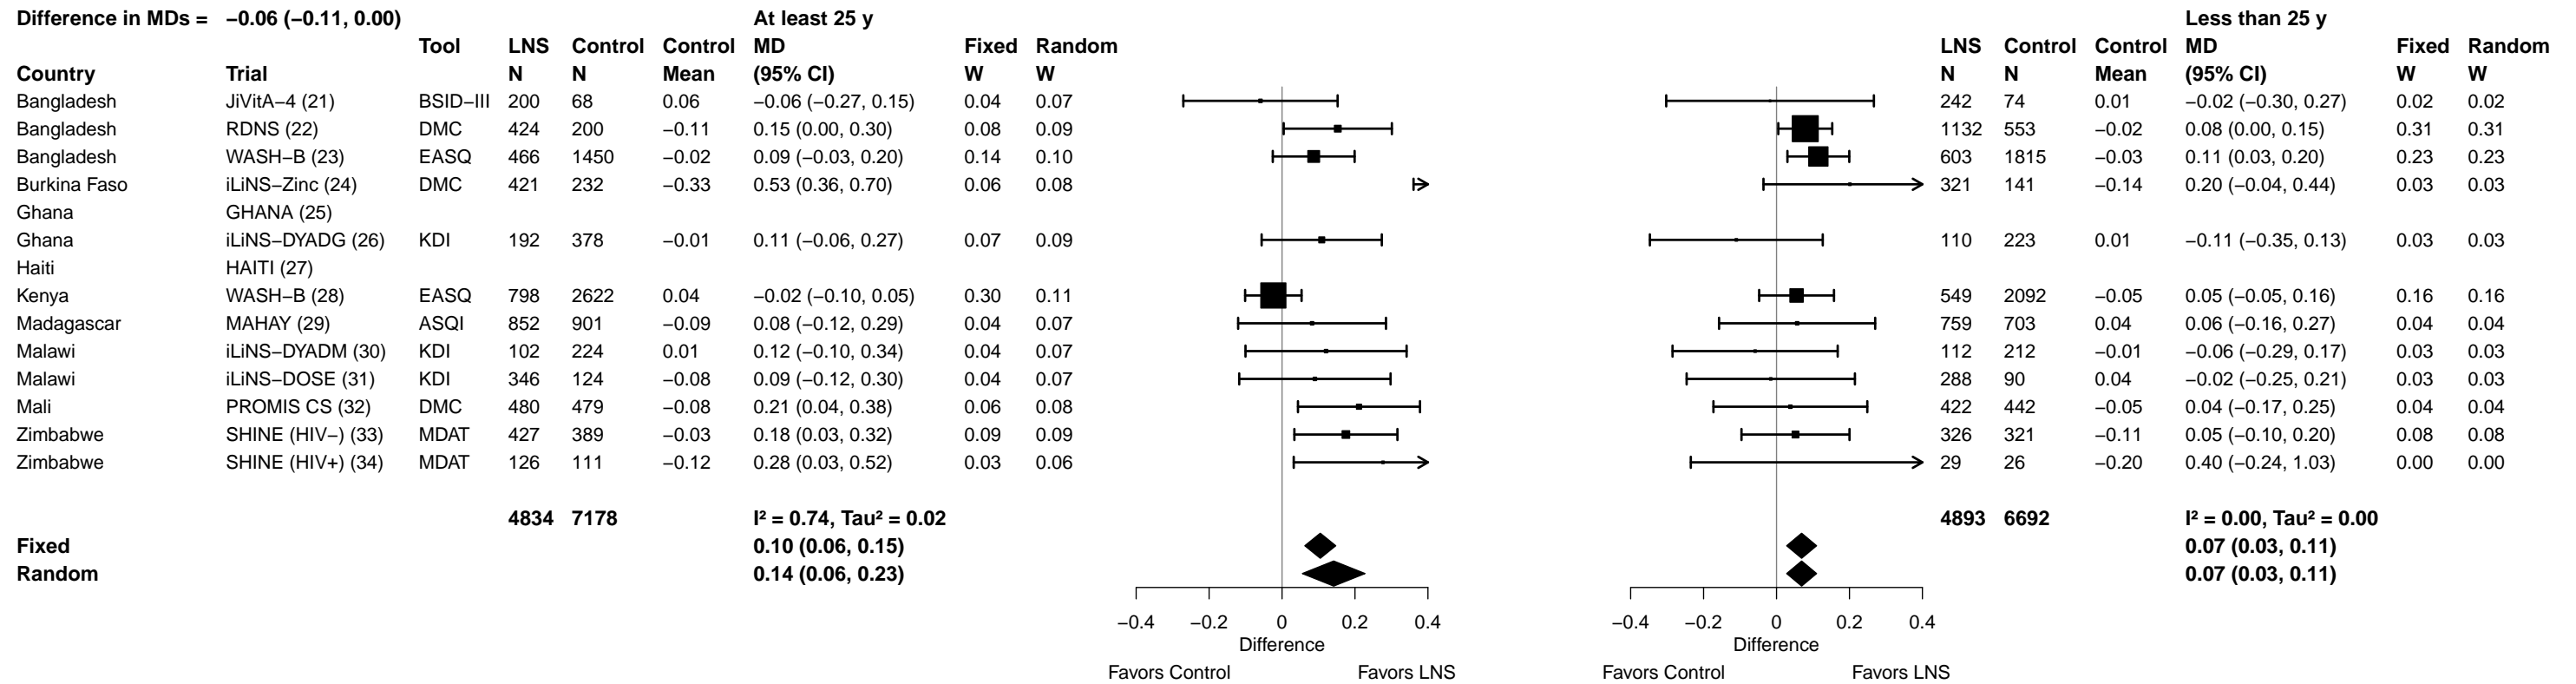



Supplemental figure 5G: Mean difference in motor z-score

5G4: Stratified by Maternal education

**P-for-interaction = 0.015**  
**Difference in MDs = 0.09 (0.02, 0.16)**

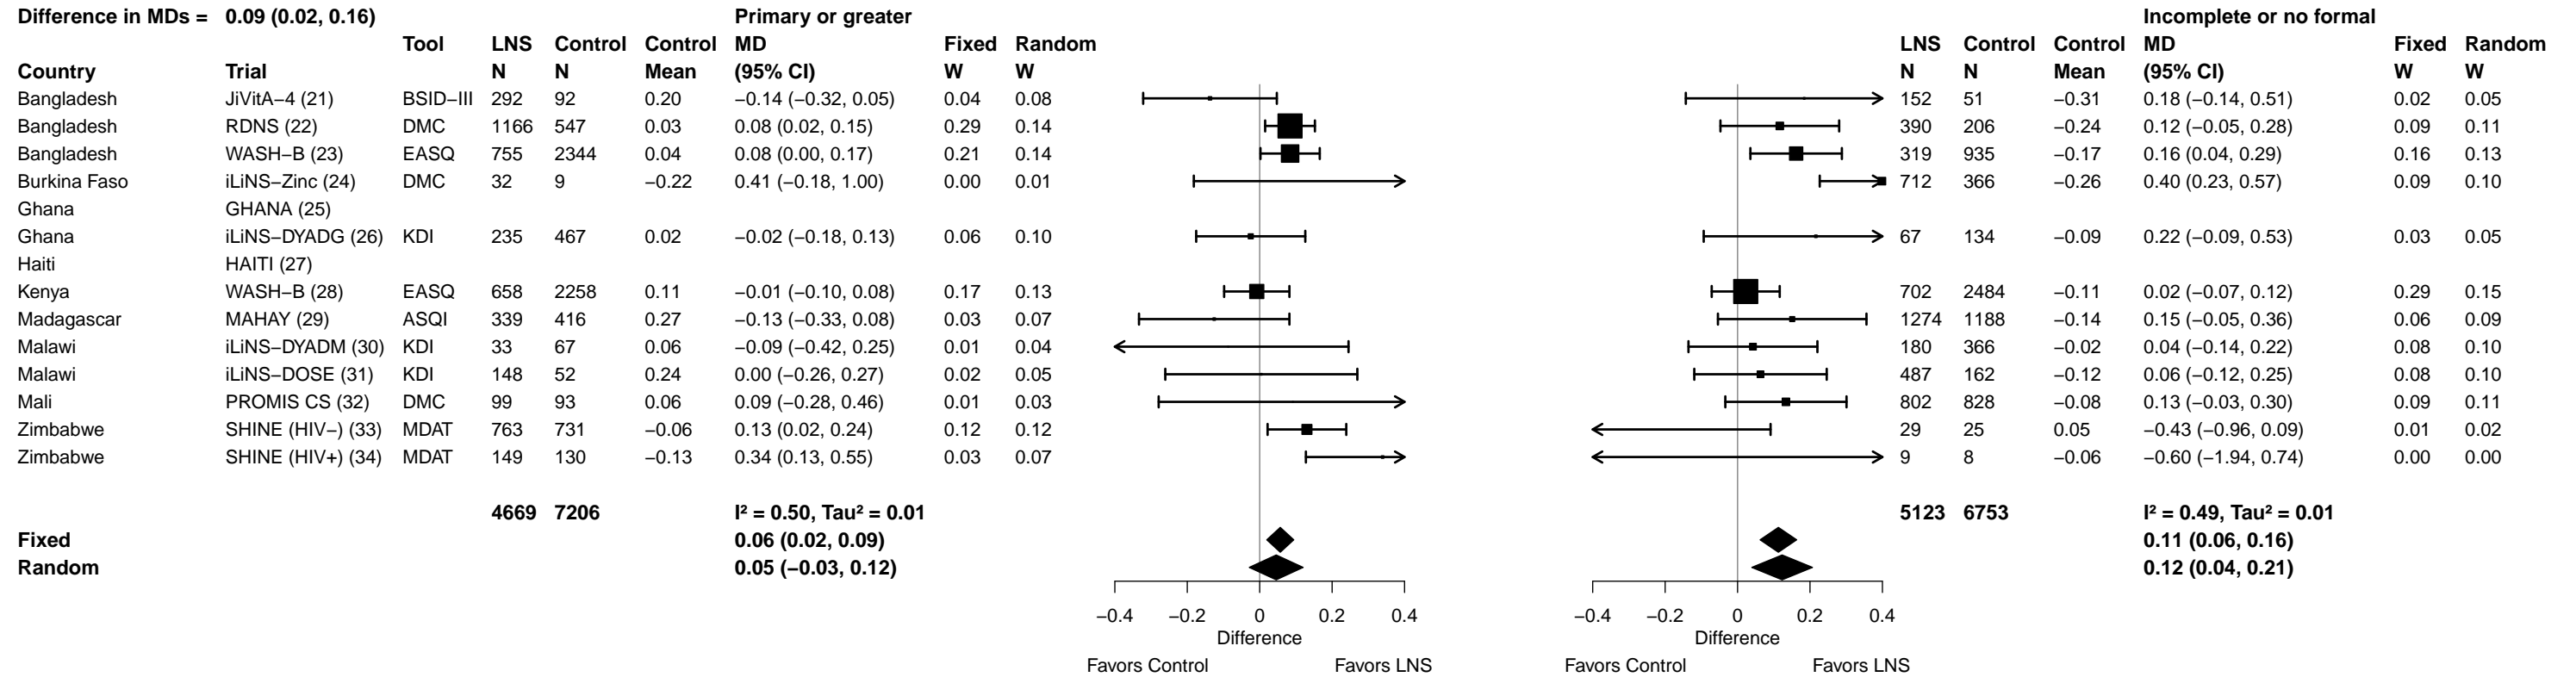

Supplemental figure 5G: Mean difference in motor z-score

5G5: Stratified by Maternal depressive symptoms

P-for-interaction = 0.823

Difference in MDs = -0.01 (-0.07, 0.06)

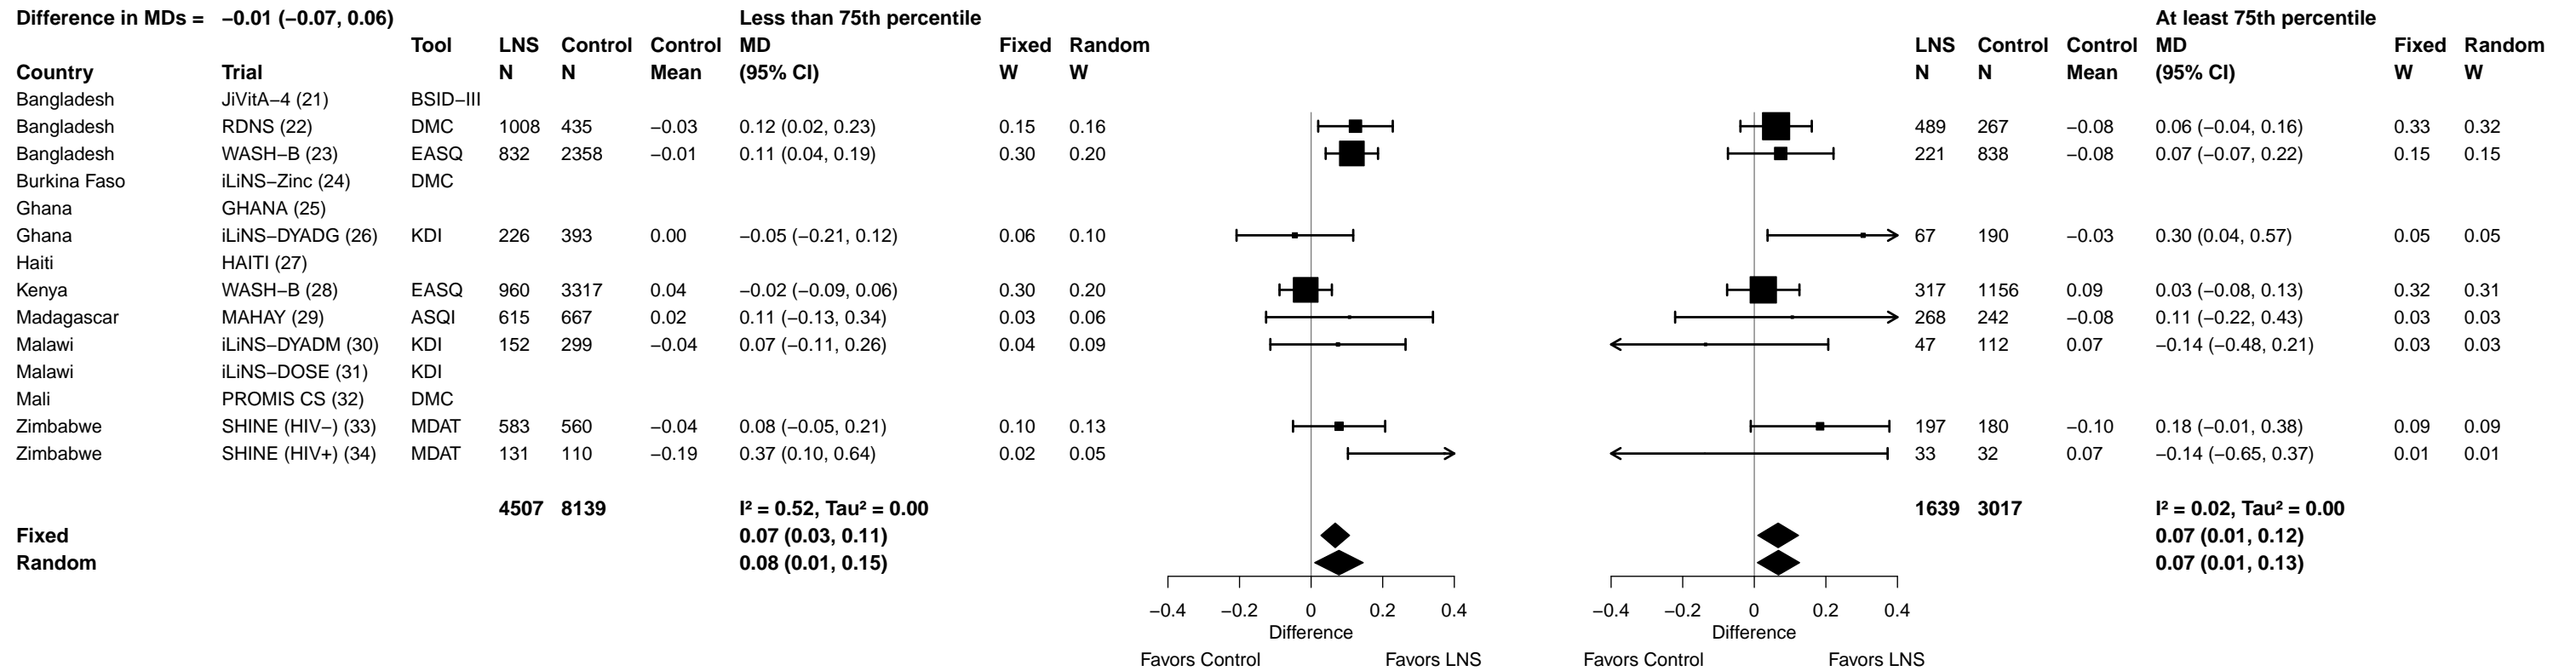

Supplemental figure 5G: Mean difference in motor z-score

5G6: Stratified by Child sex

P-for-interaction = 0.754  
 Difference in MDs = 0.01 (-0.04, 0.06)

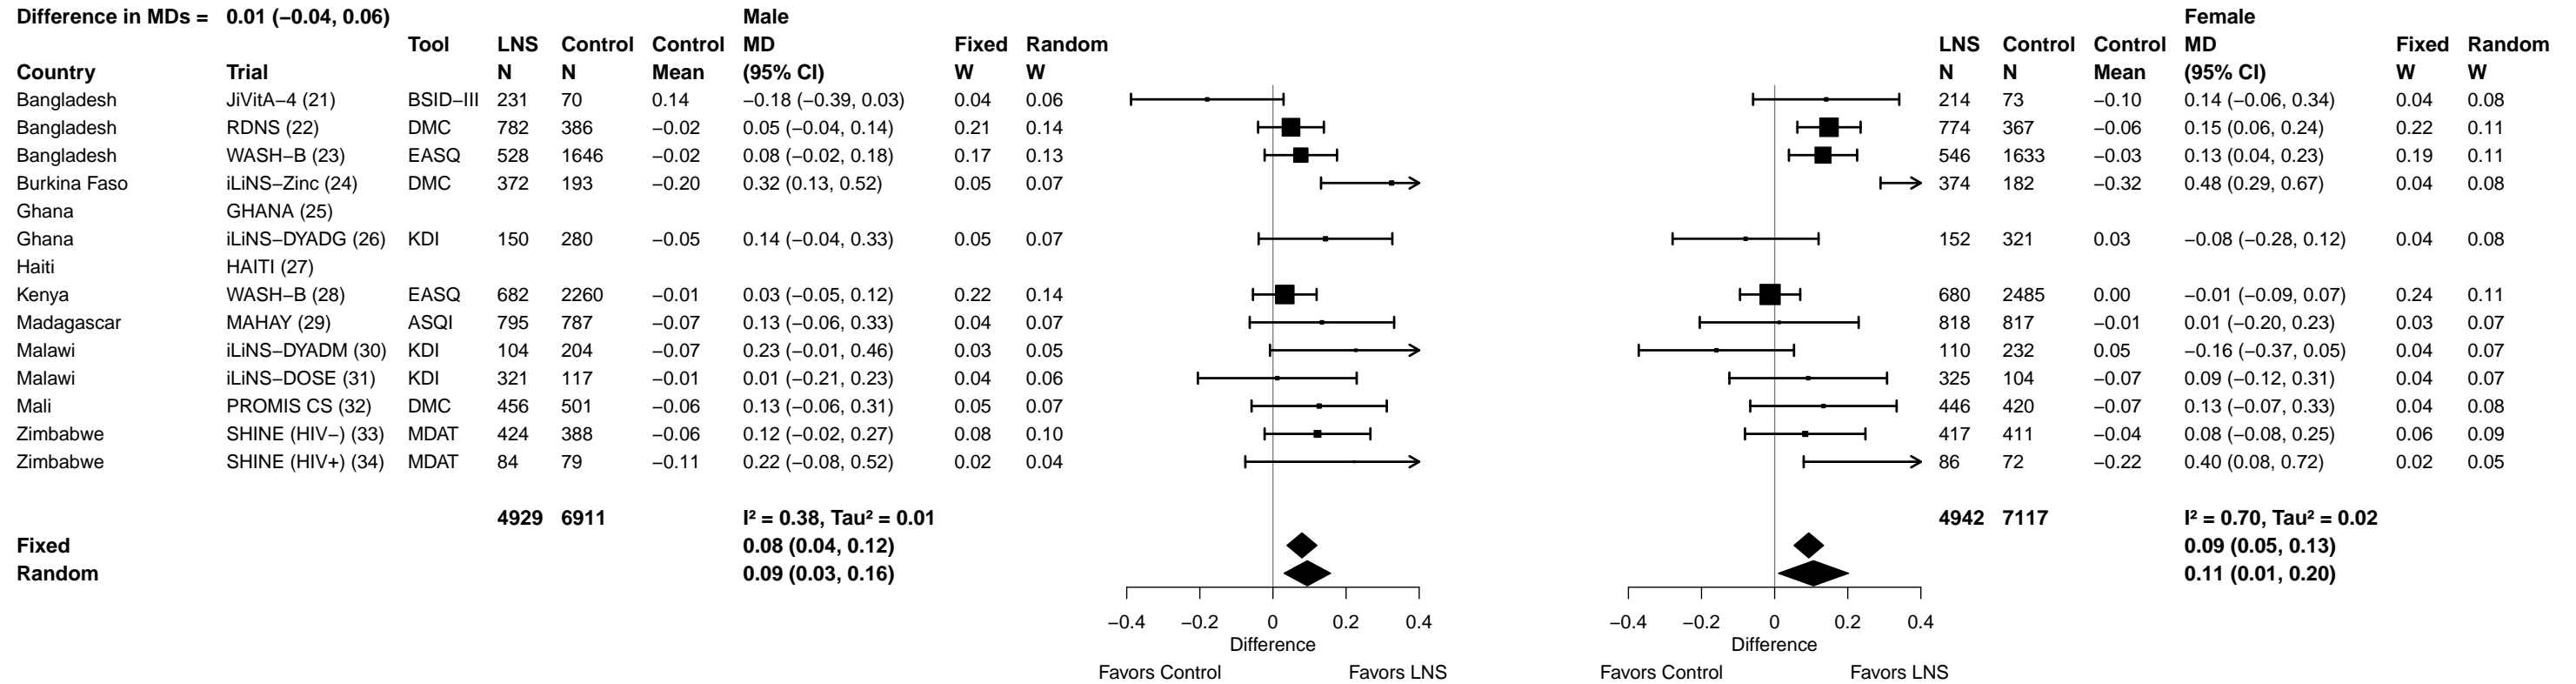

Supplemental figure 5G: Mean difference in motor z-score

5G7: Stratified by Child birth order

P-for-interaction = 0.042

Difference in MDs = -0.07 (-0.13, 0.00)

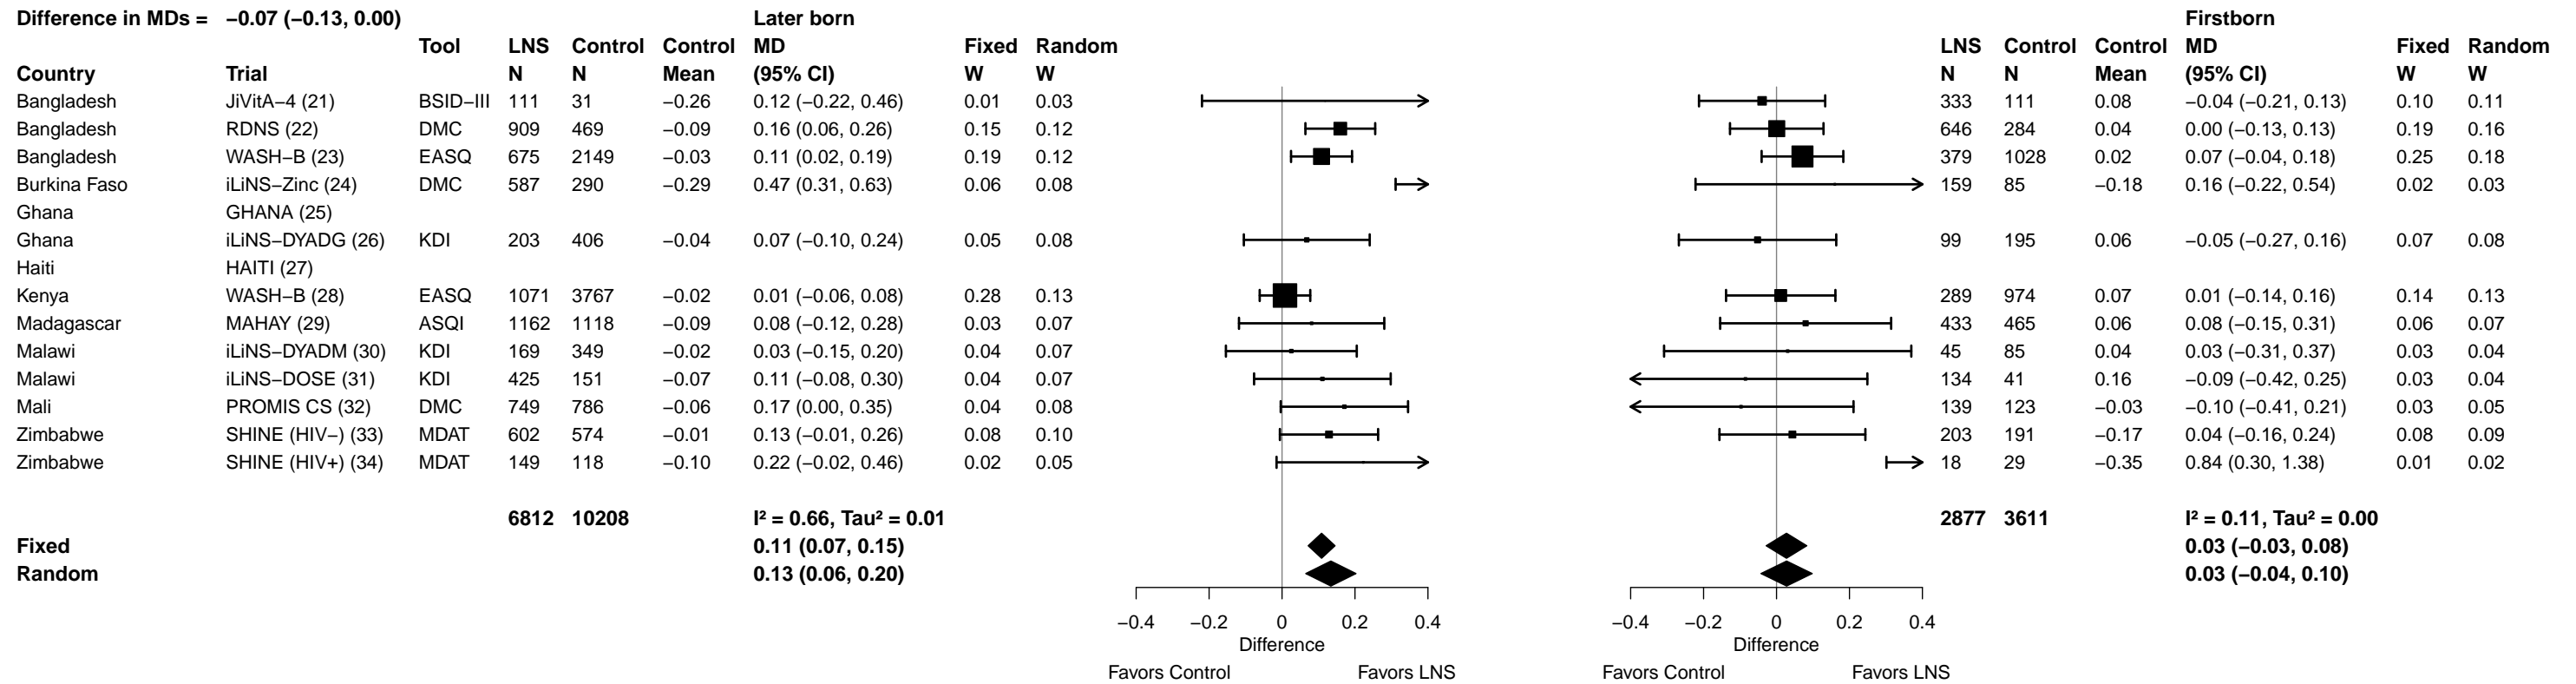

Supplemental figure 5G: Mean difference in motor z-score

5G8: Stratified by Child baseline stunting

**P-for-interaction = 0.207**  
**Difference in MDs = 0.07 (-0.04, 0.18)**

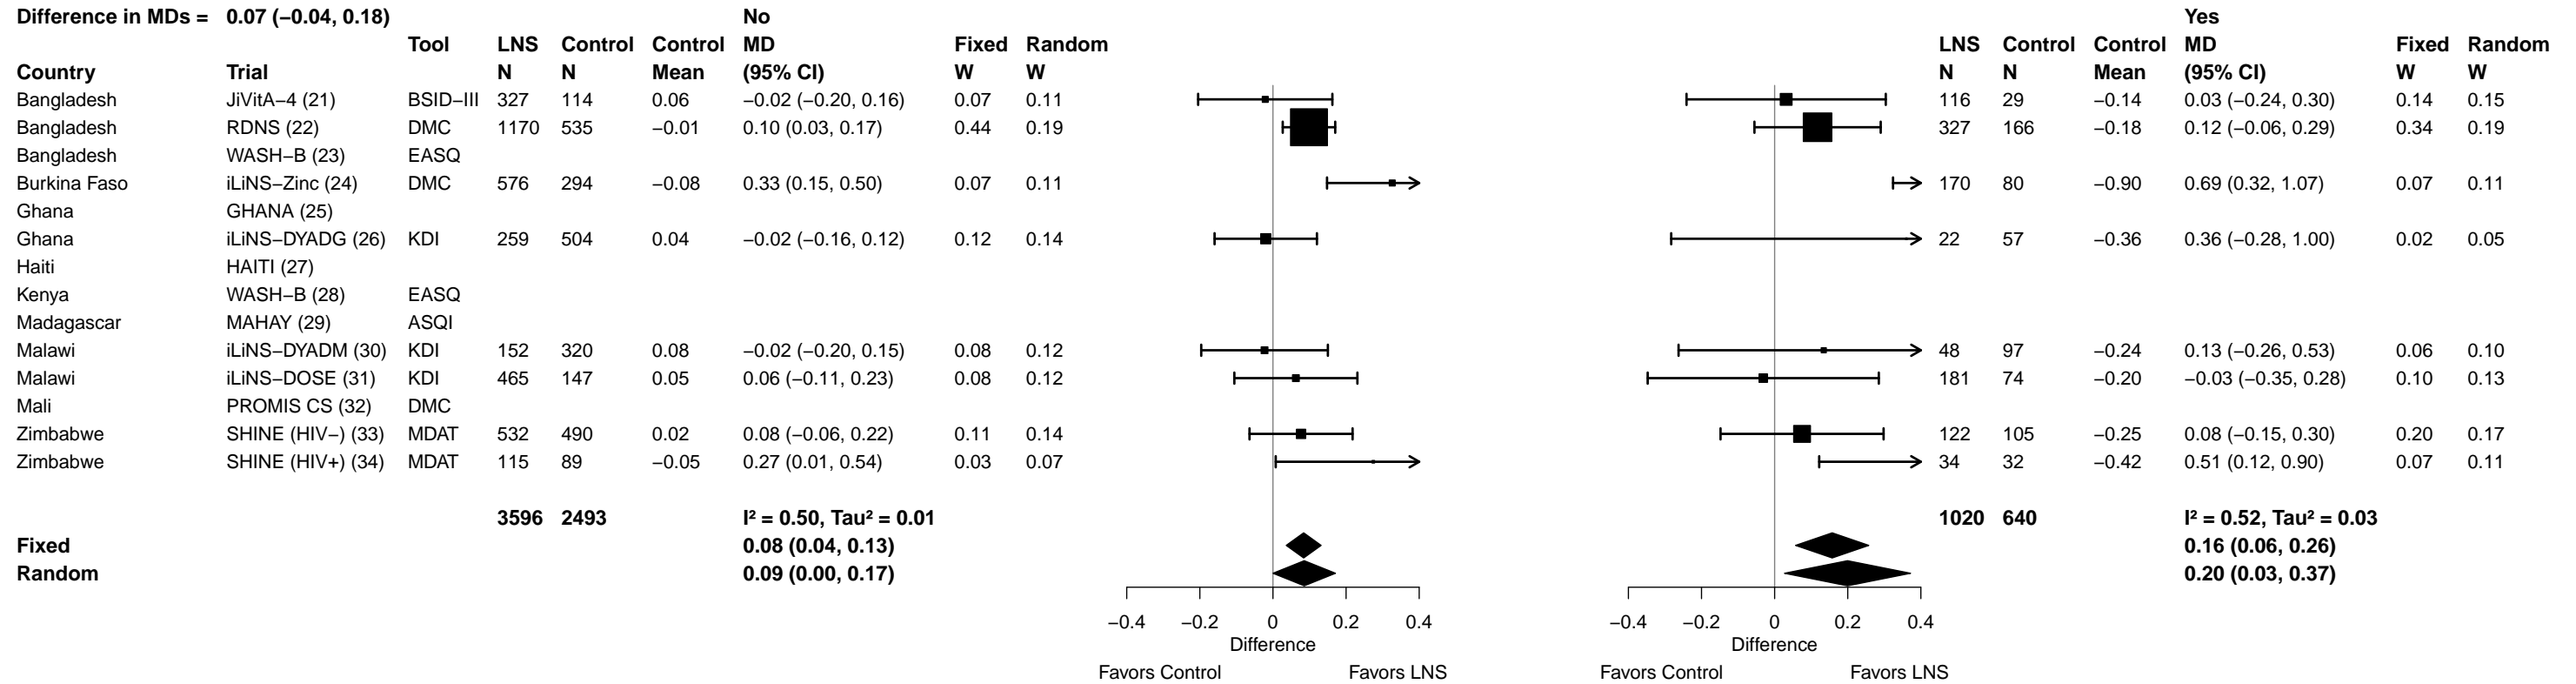

Supplemental figure 5G: Mean difference in motor z-score

5G9: Stratified by Child baseline acute malnutrition

**P-for-interaction = 0.131**  
**Difference in MDs = 0.12 (-0.04, 0.28)**

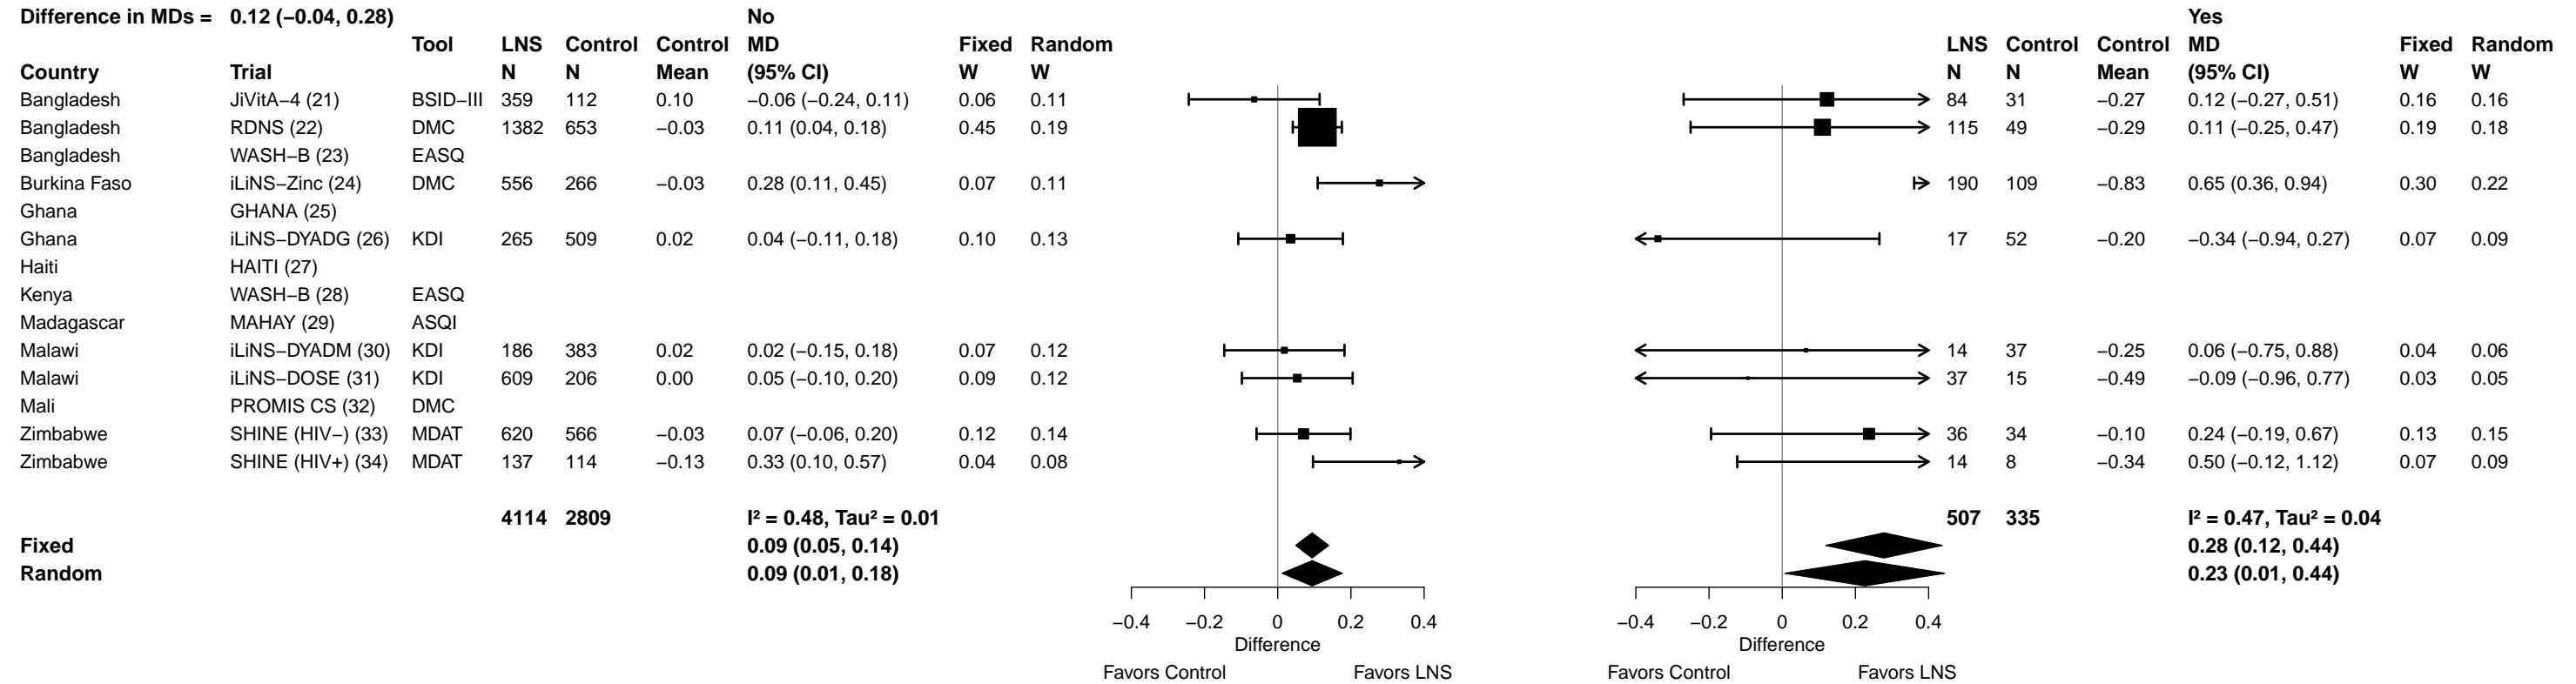

Supplemental figure 5G: Mean difference in motor z-score

5G10: Stratified by Child baseline anemia

P-for-interaction = 0.369  
 Difference in MDs = 0.07 (-0.08, 0.21)

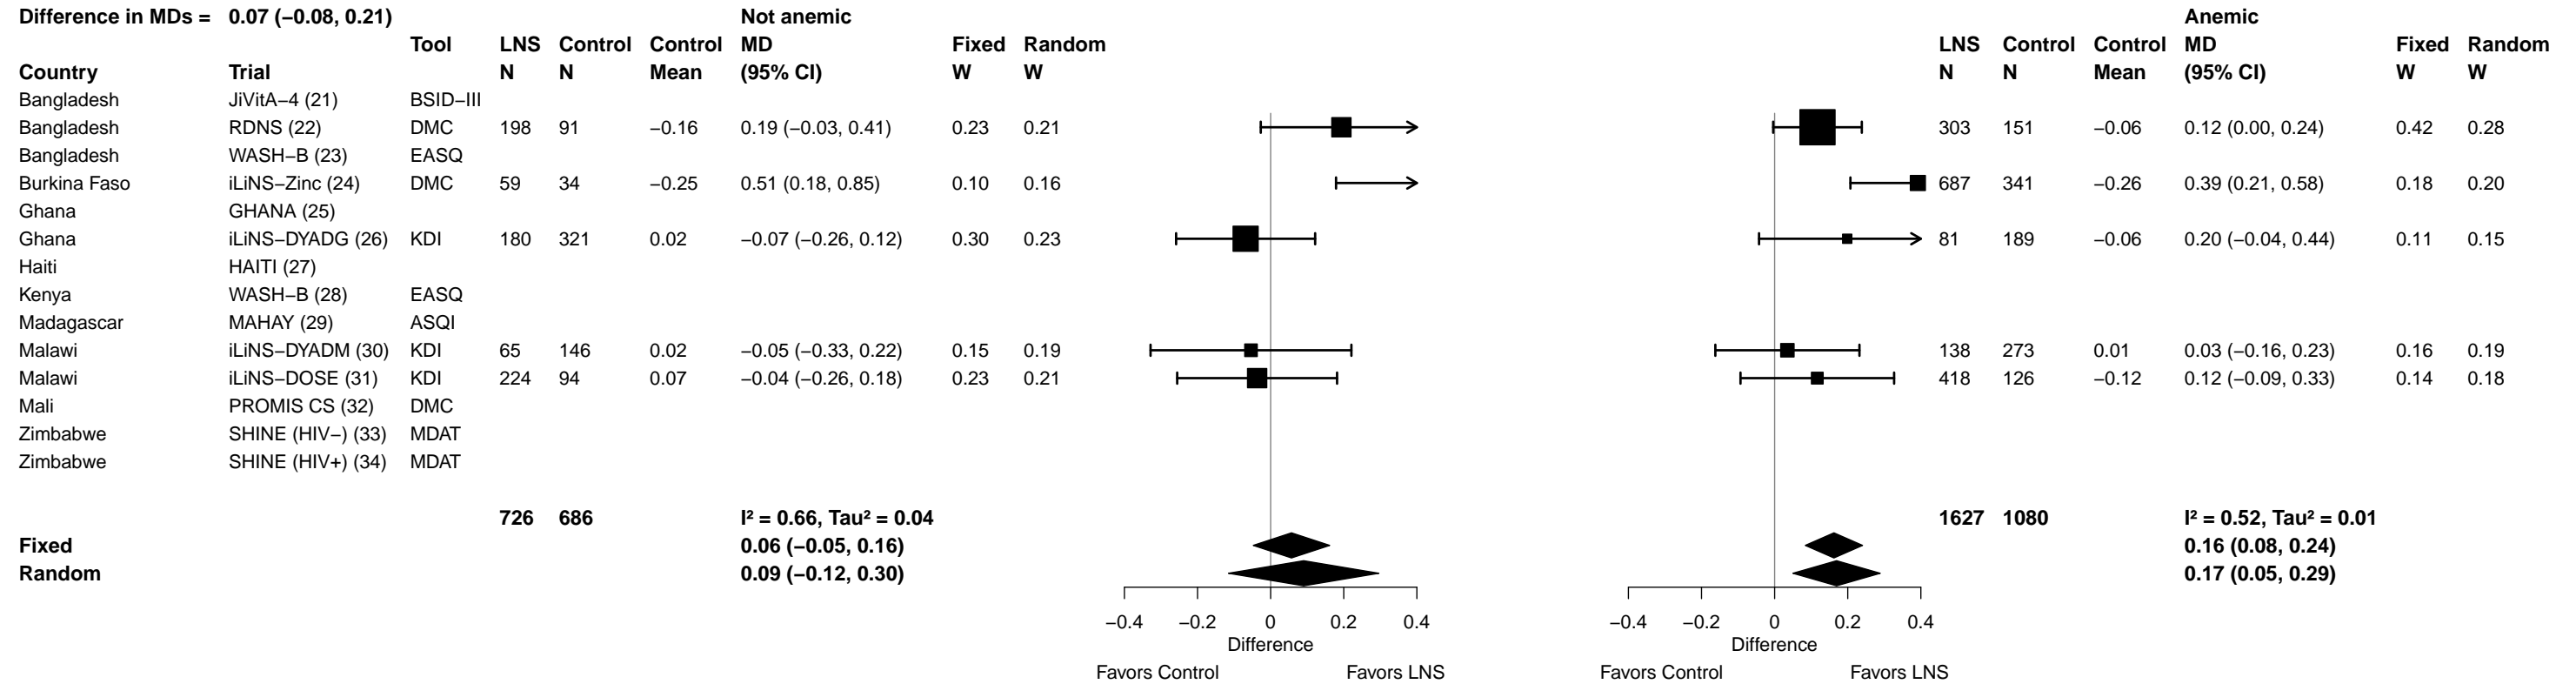

### Supplemental figure 5H: Motor lowest decile prevalence ratio

#### 5H1: Stratified by Maternal height

P-for-interaction = 0.550  
 Ratio of PRs = 1.09 (0.82, 1.45)

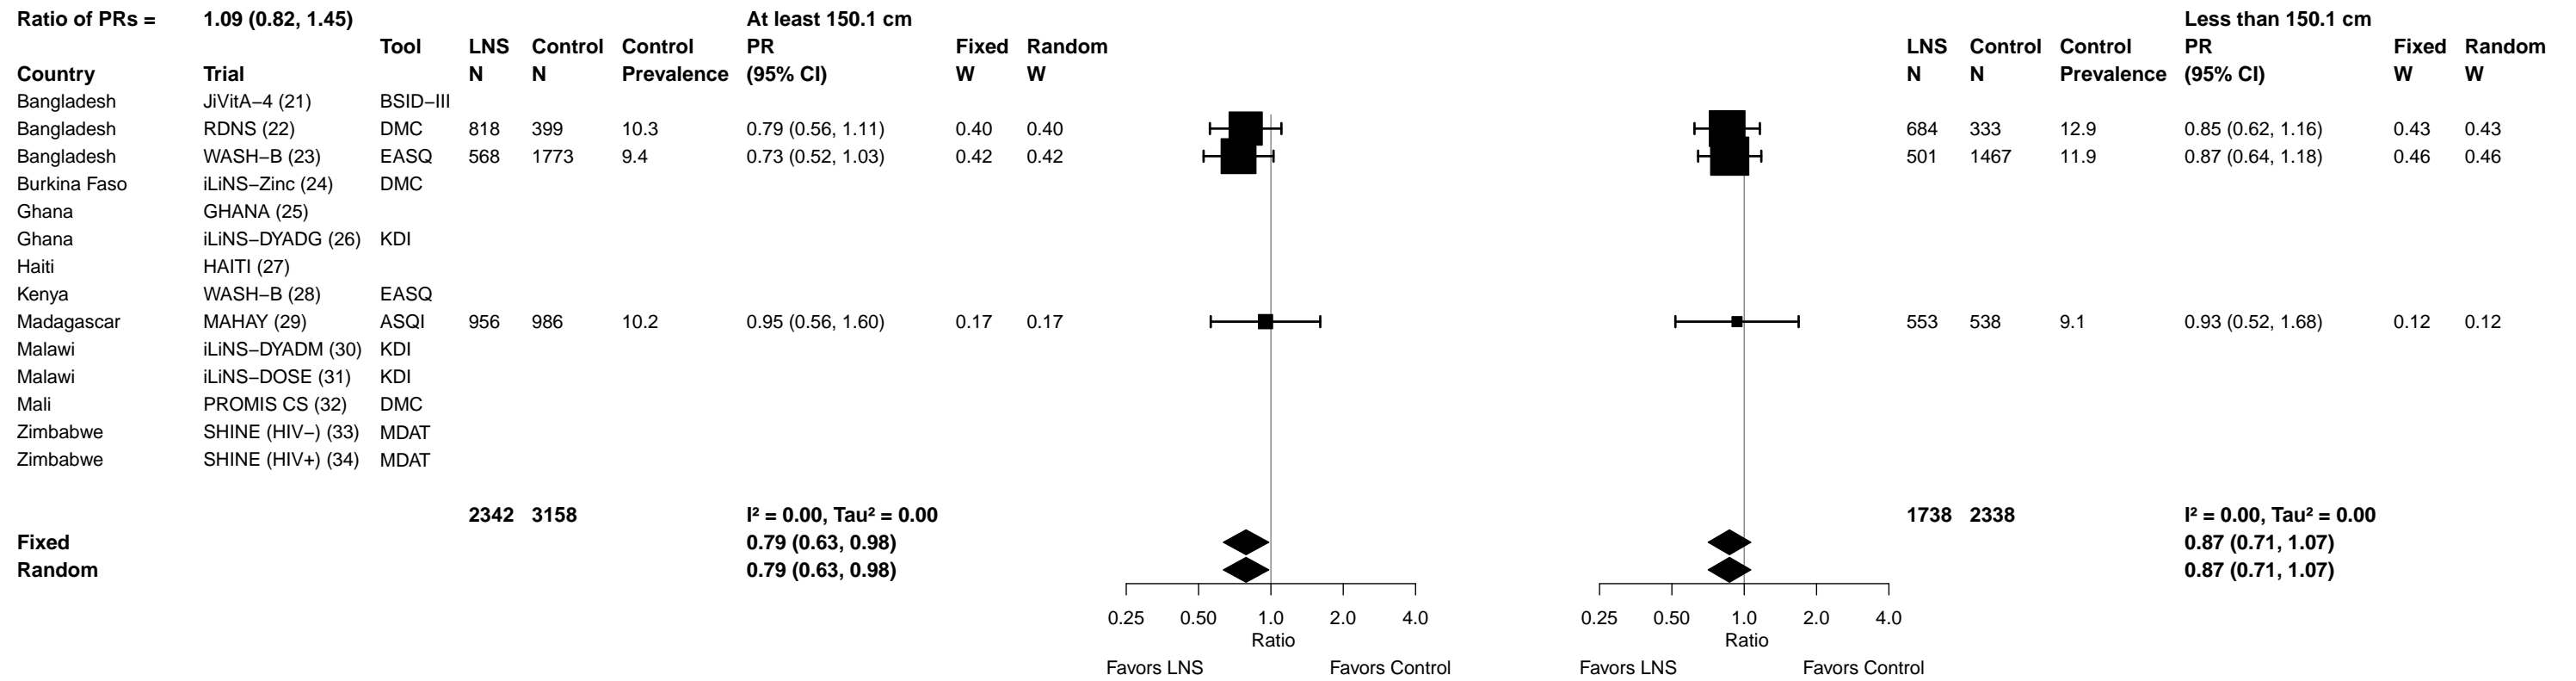



Supplemental figure 5H: Motor lowest decile prevalence ratio

5H2: Stratified by Maternal BMI

P-for-interaction = 0.477

Ratio of PRs = 1.08 (0.87, 1.34)

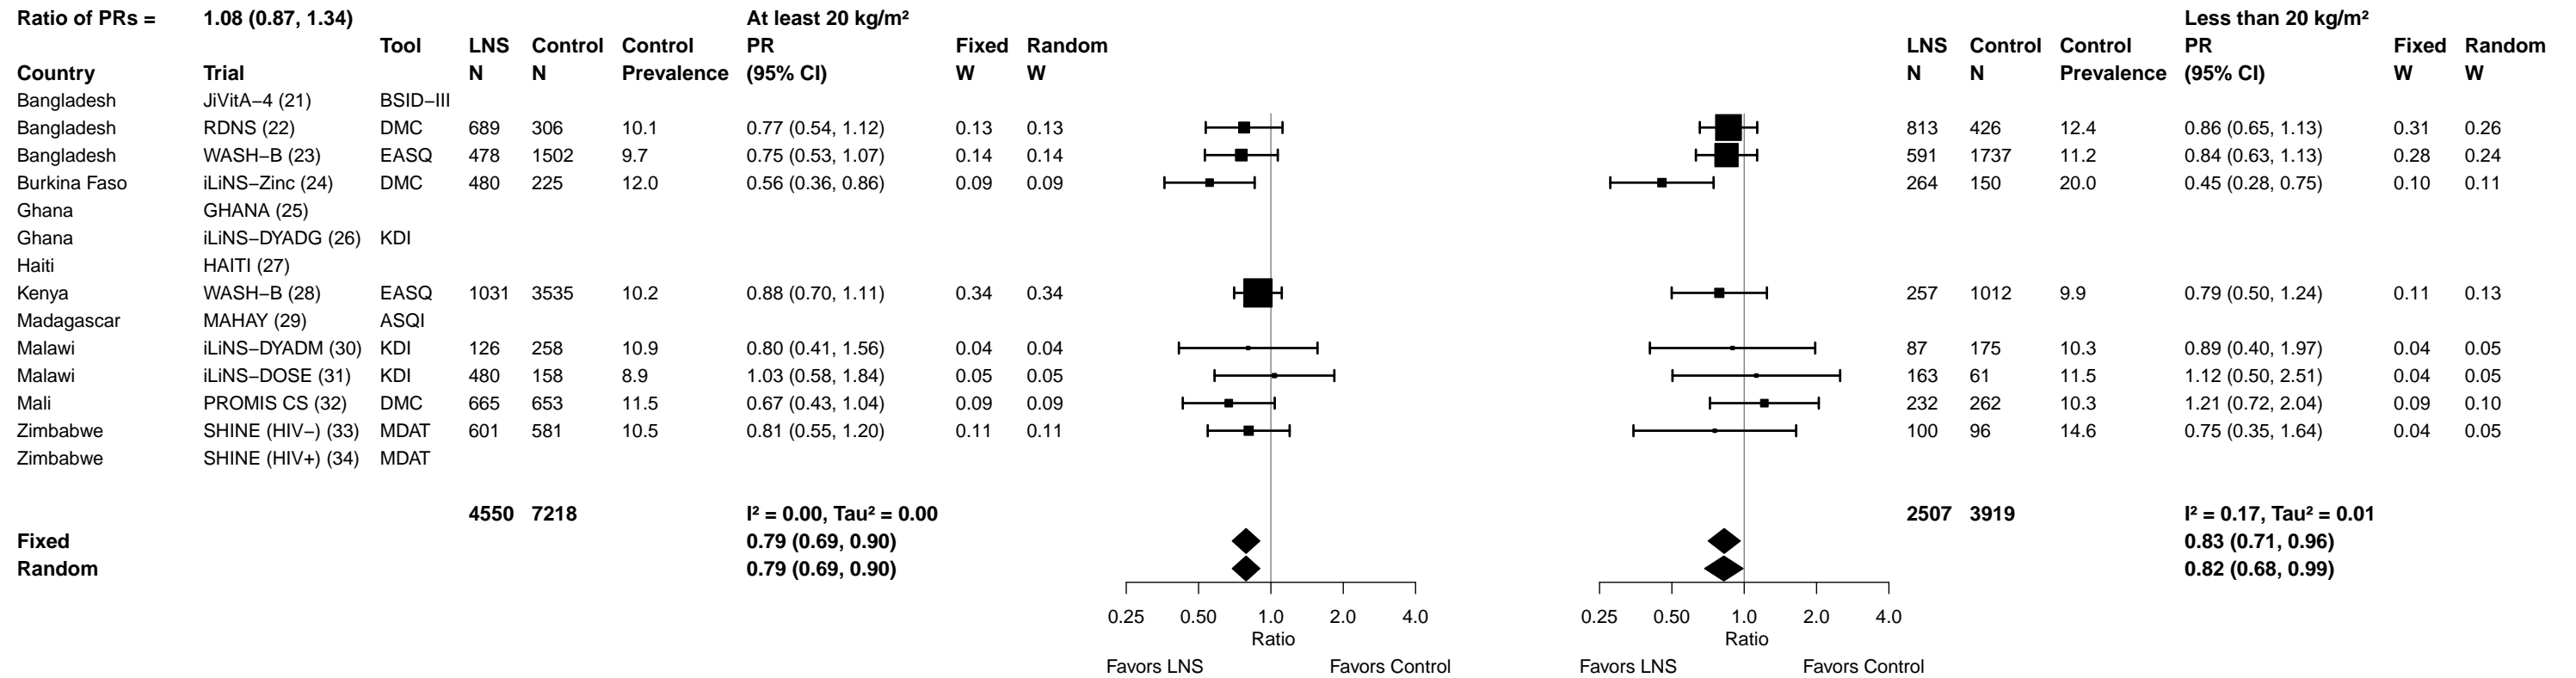

Supplemental figure 5H: Motor lowest decile prevalence ratio

5H3: Stratified by Maternal age

P-for-interaction = 0.466  
 Ratio of PRs = 1.07 (0.89, 1.28)

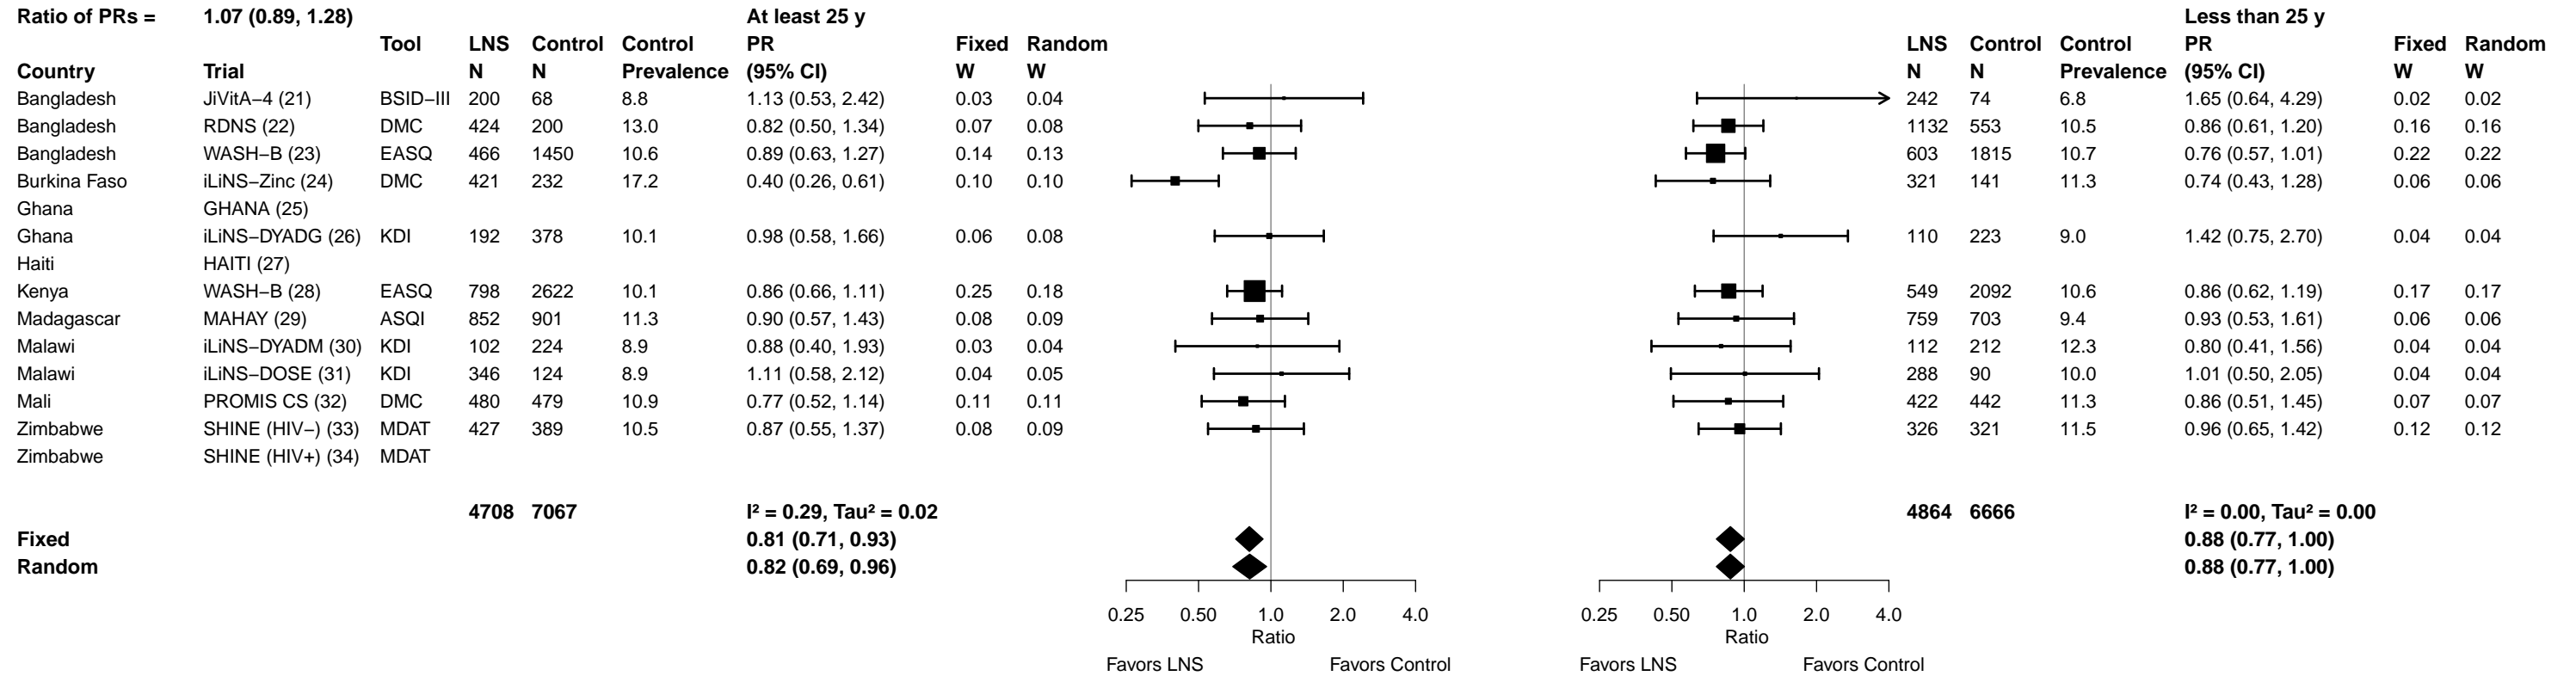

Supplemental figure 5H: Motor lowest decile prevalence ratio

5H4: Stratified by Maternal education

P-for-interaction = 0.225  
 Ratio of PRs = 0.87 (0.69, 1.09)

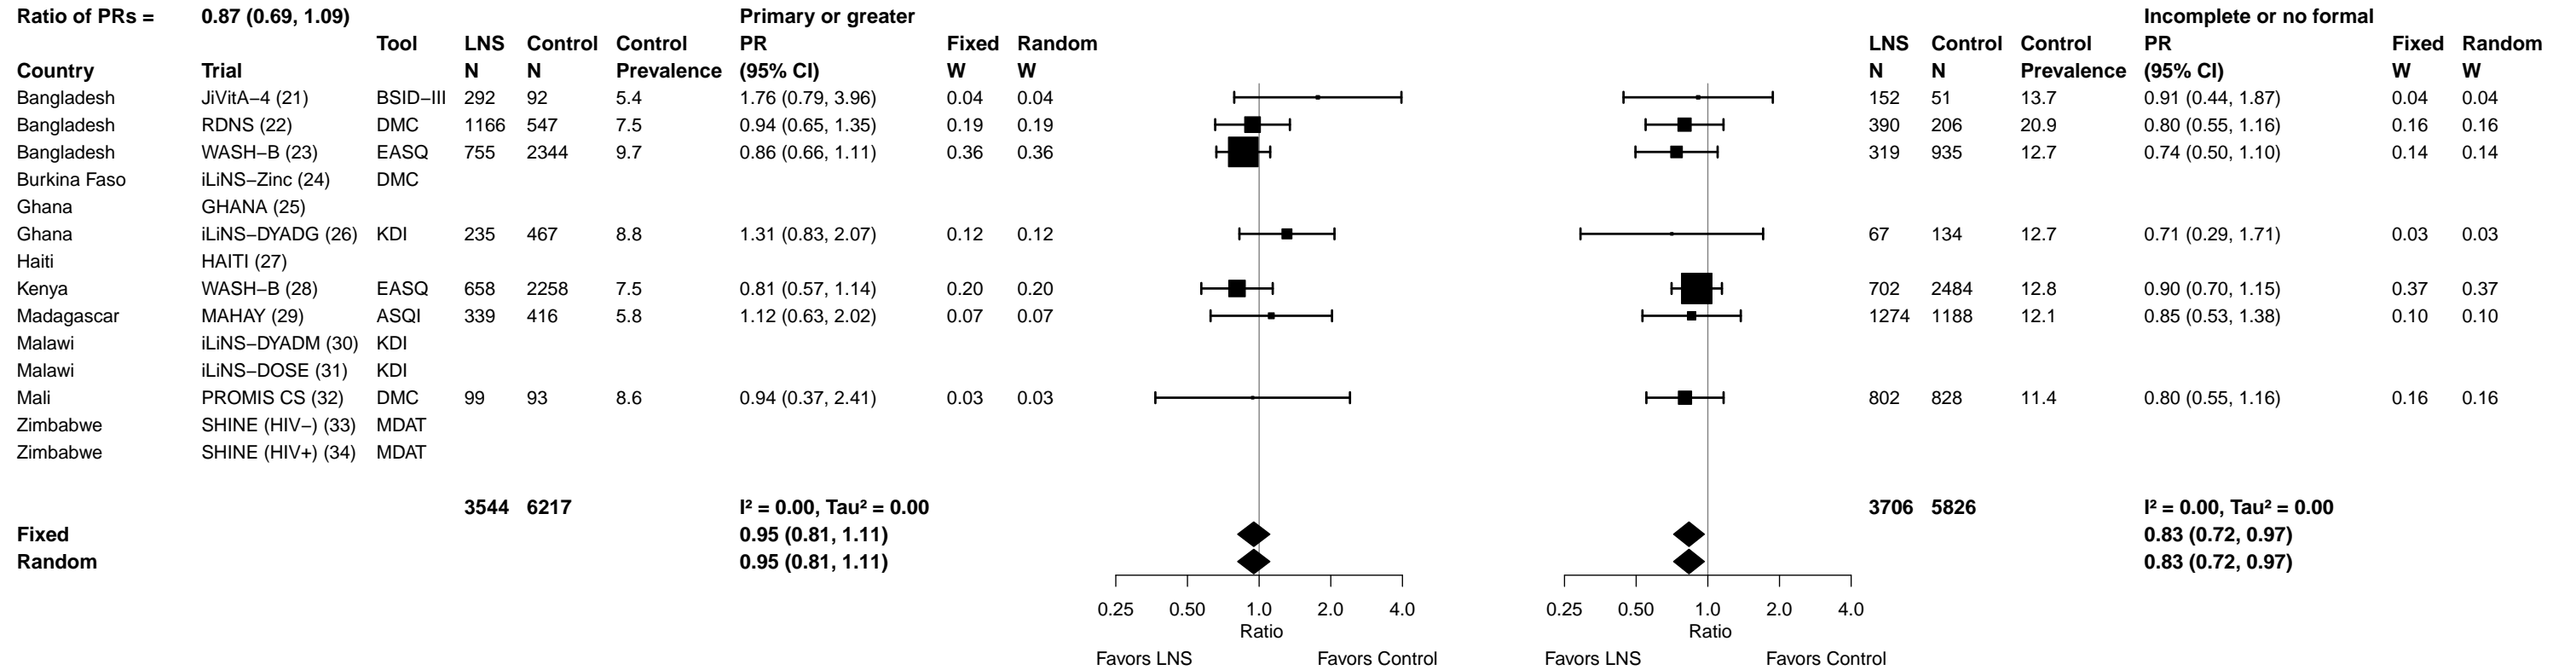

Supplemental figure 5H: Motor lowest decile prevalence ratio

5H5: Stratified by Maternal depressive symptoms

P-for-interaction = 0.649  
 Ratio of PRs = 1.06 (0.83, 1.34)

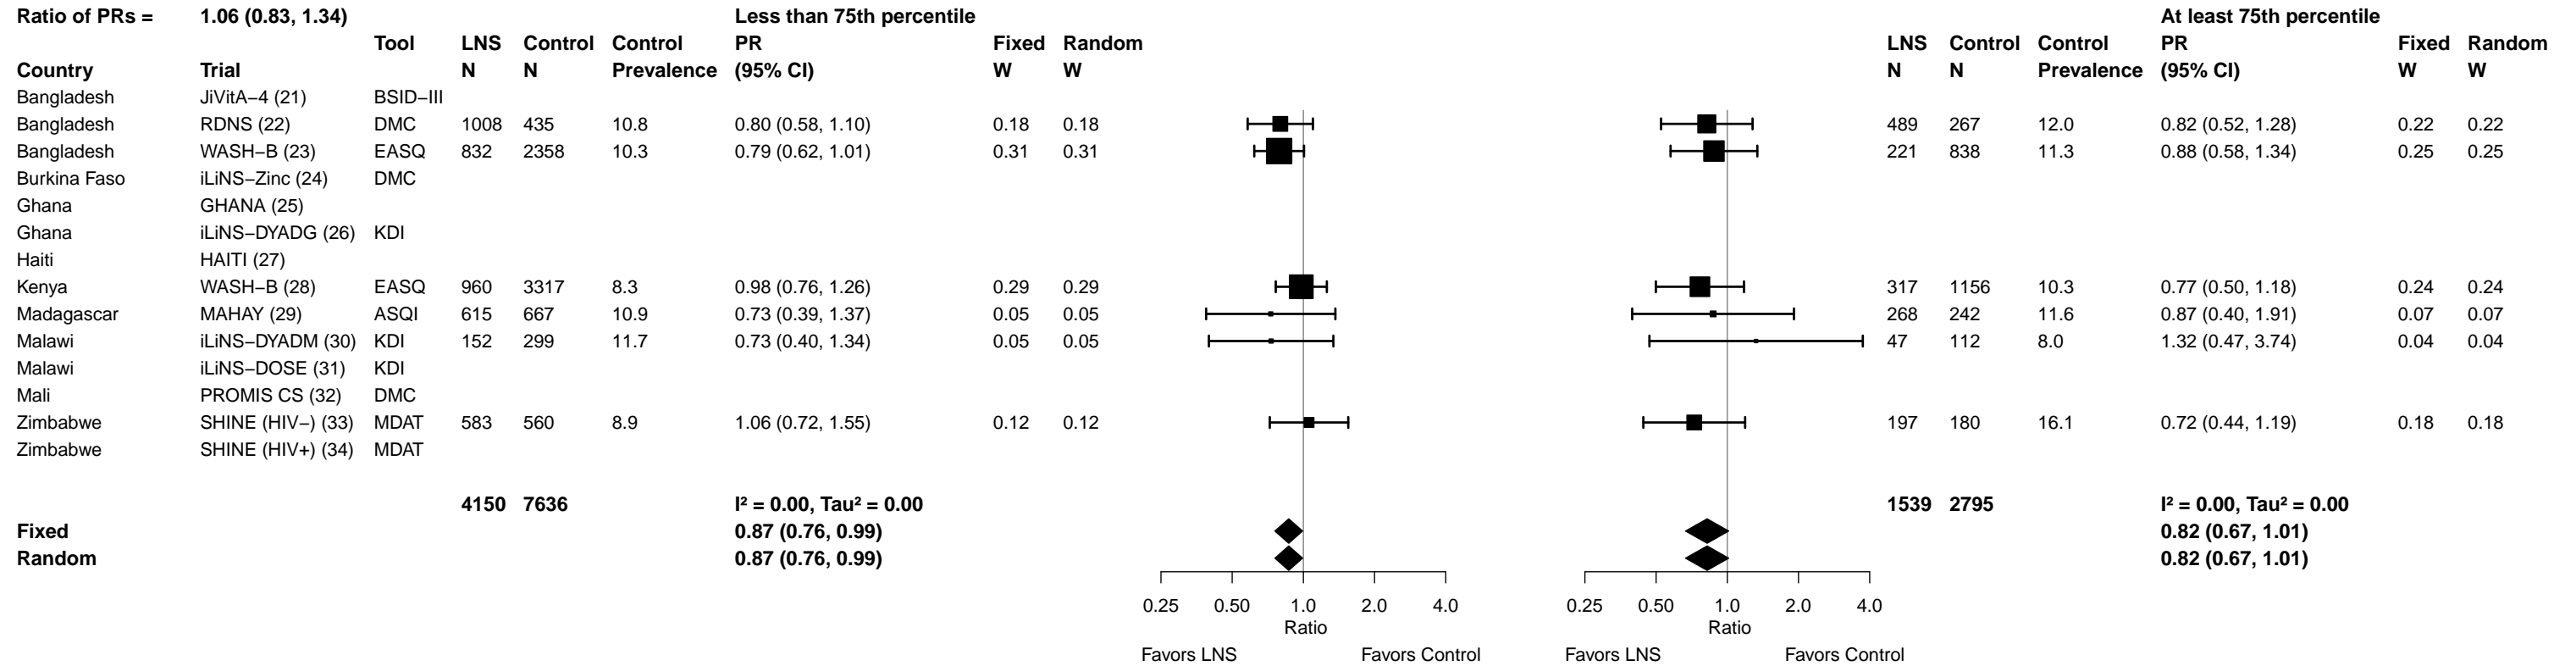

Supplemental figure 5H: Motor lowest decile prevalence ratio

5H6: Stratified by Child sex

P-for-interaction = 0.701  
 Ratio of PRs = 0.97 (0.81, 1.15)

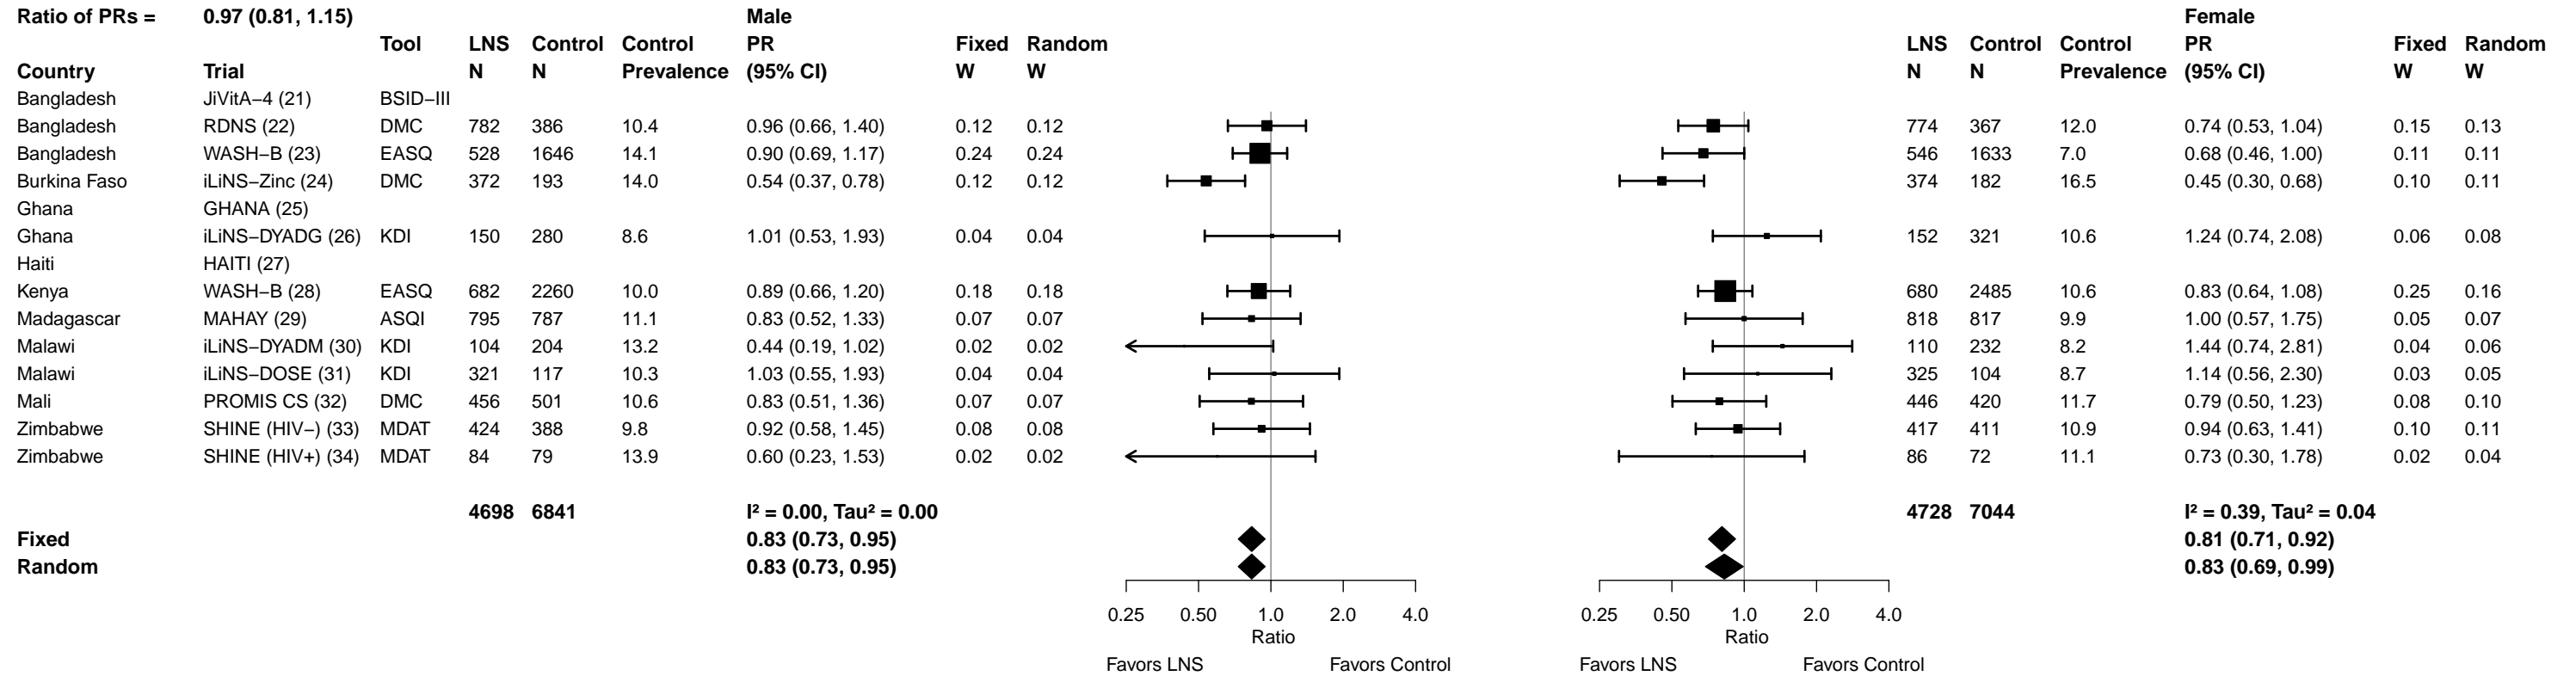

Supplemental figure 5H: Motor lowest decile prevalence ratio

5H7: Stratified by Child birth order

P-for-interaction = 0.015  
 Ratio of PRs = 1.29 (1.05, 1.59)

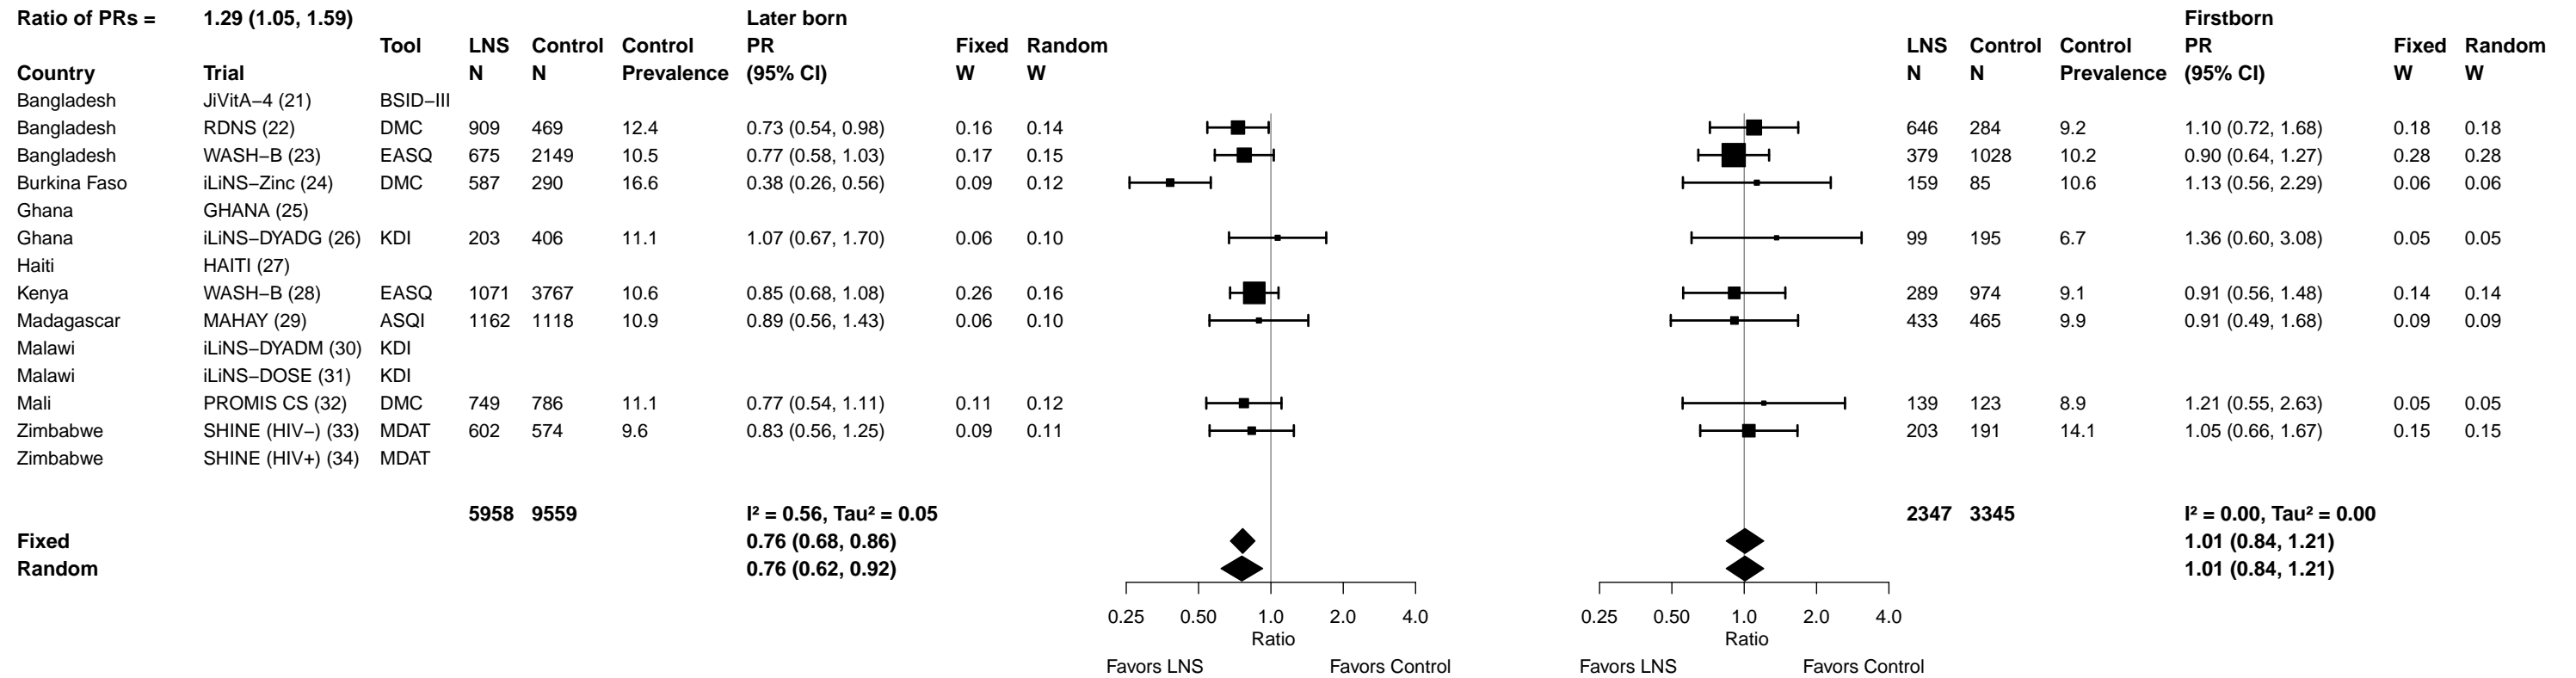

Supplemental figure 5H: Motor lowest decile prevalence ratio

5H8: Stratified by Child baseline stunting

P-for-interaction = 0.870  
 Ratio of PRs = 0.97 (0.72, 1.32)

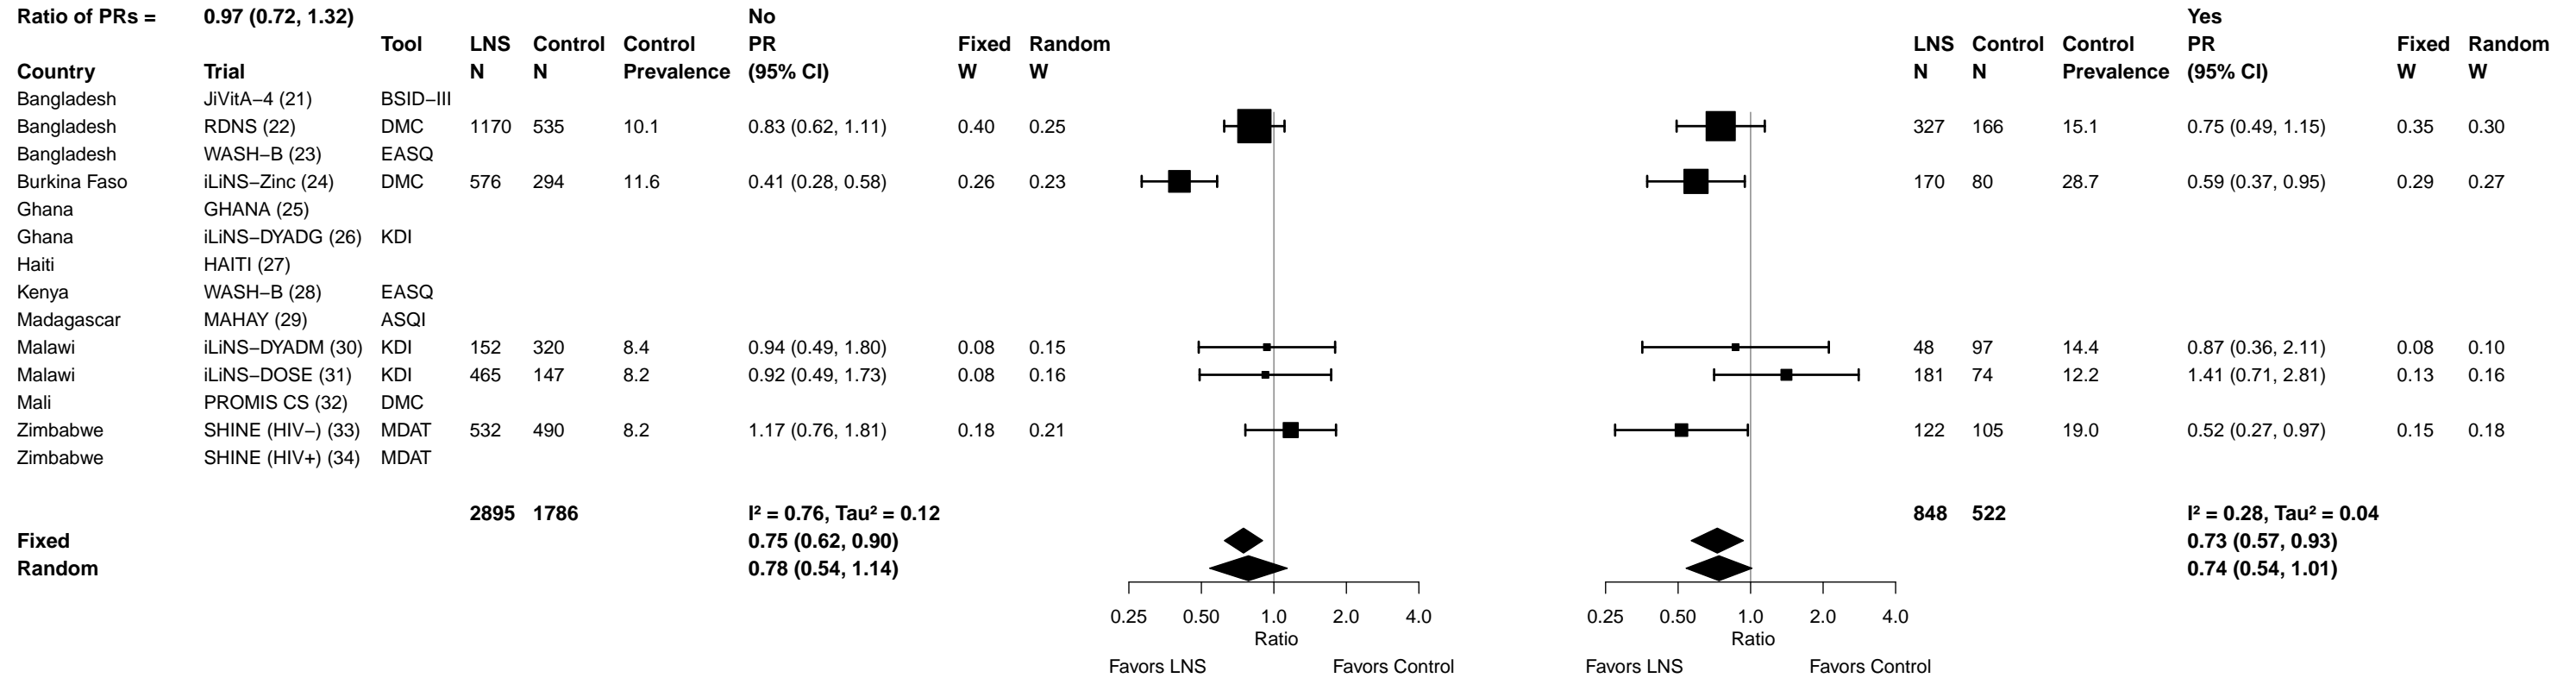

Supplemental figure 5H: Motor lowest decile prevalence ratio

5H9: Stratified by Child baseline acute malnutrition

P-for-interaction = 0.612  
 Ratio of PRs = 1.14 (0.69, 1.88)

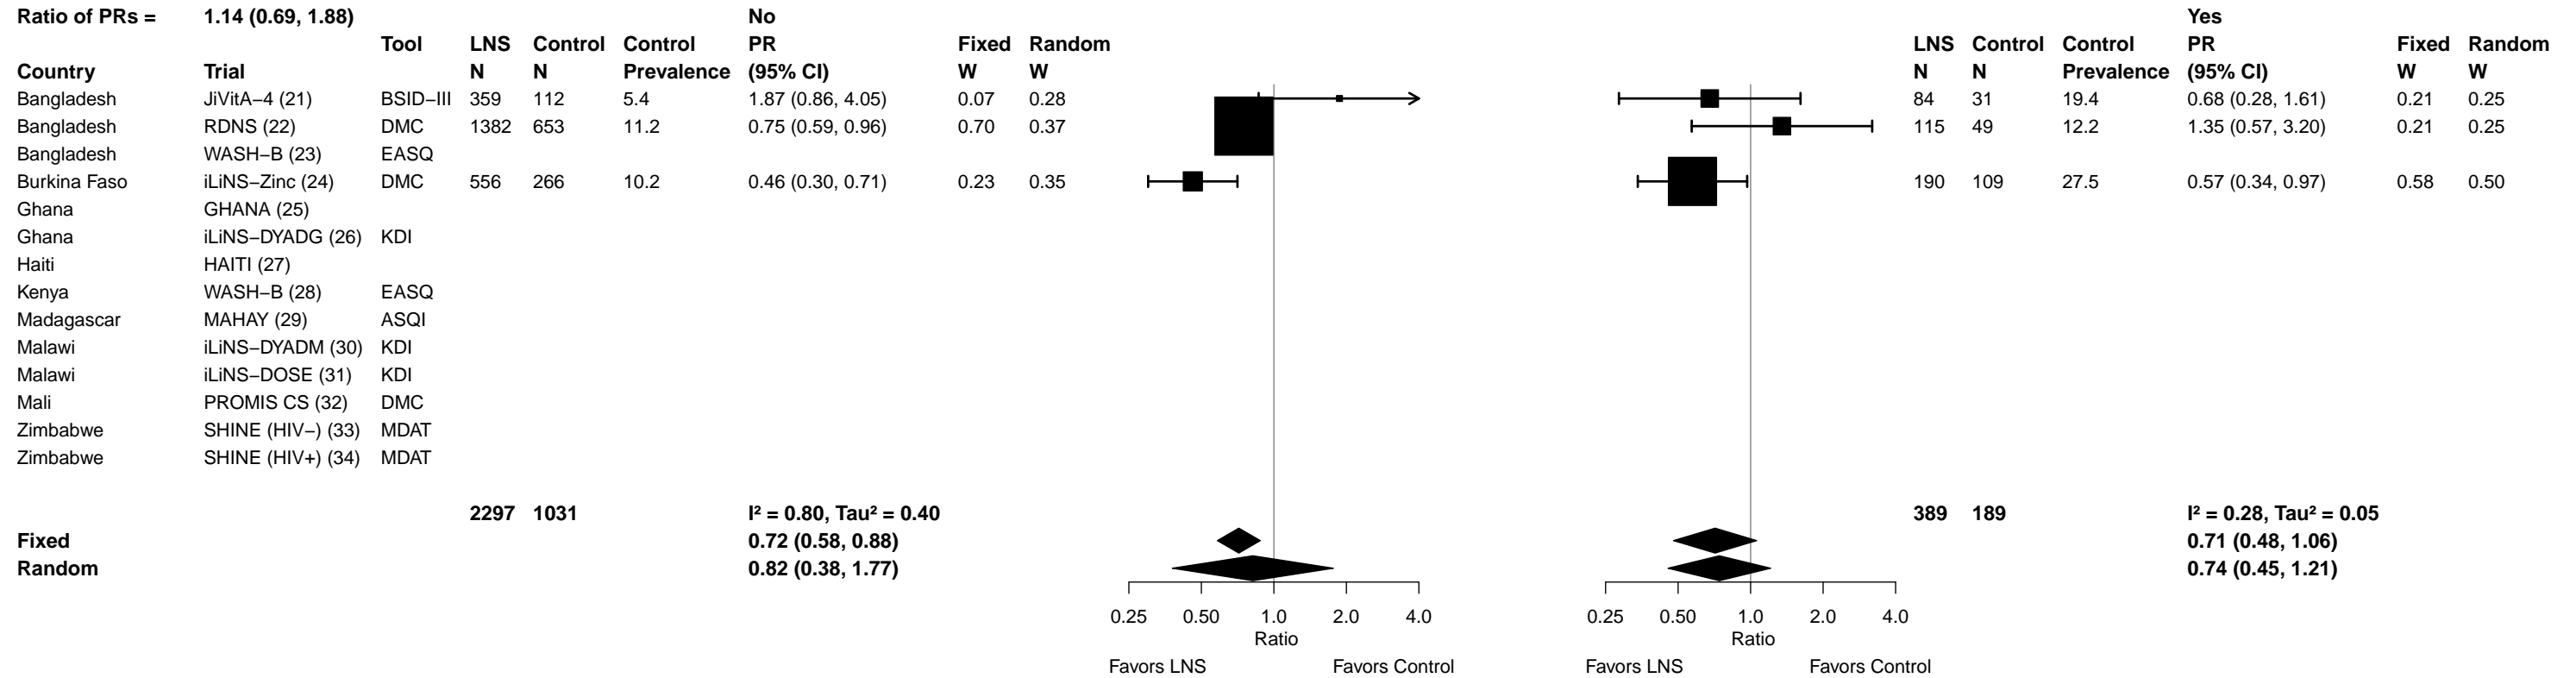



Supplemental figure 5H: Motor lowest decile prevalence ratio

5H10: Stratified by Child baseline anemia

P-for-interaction = 0.237  
 Ratio of PRs = 0.74 (0.46, 1.21)

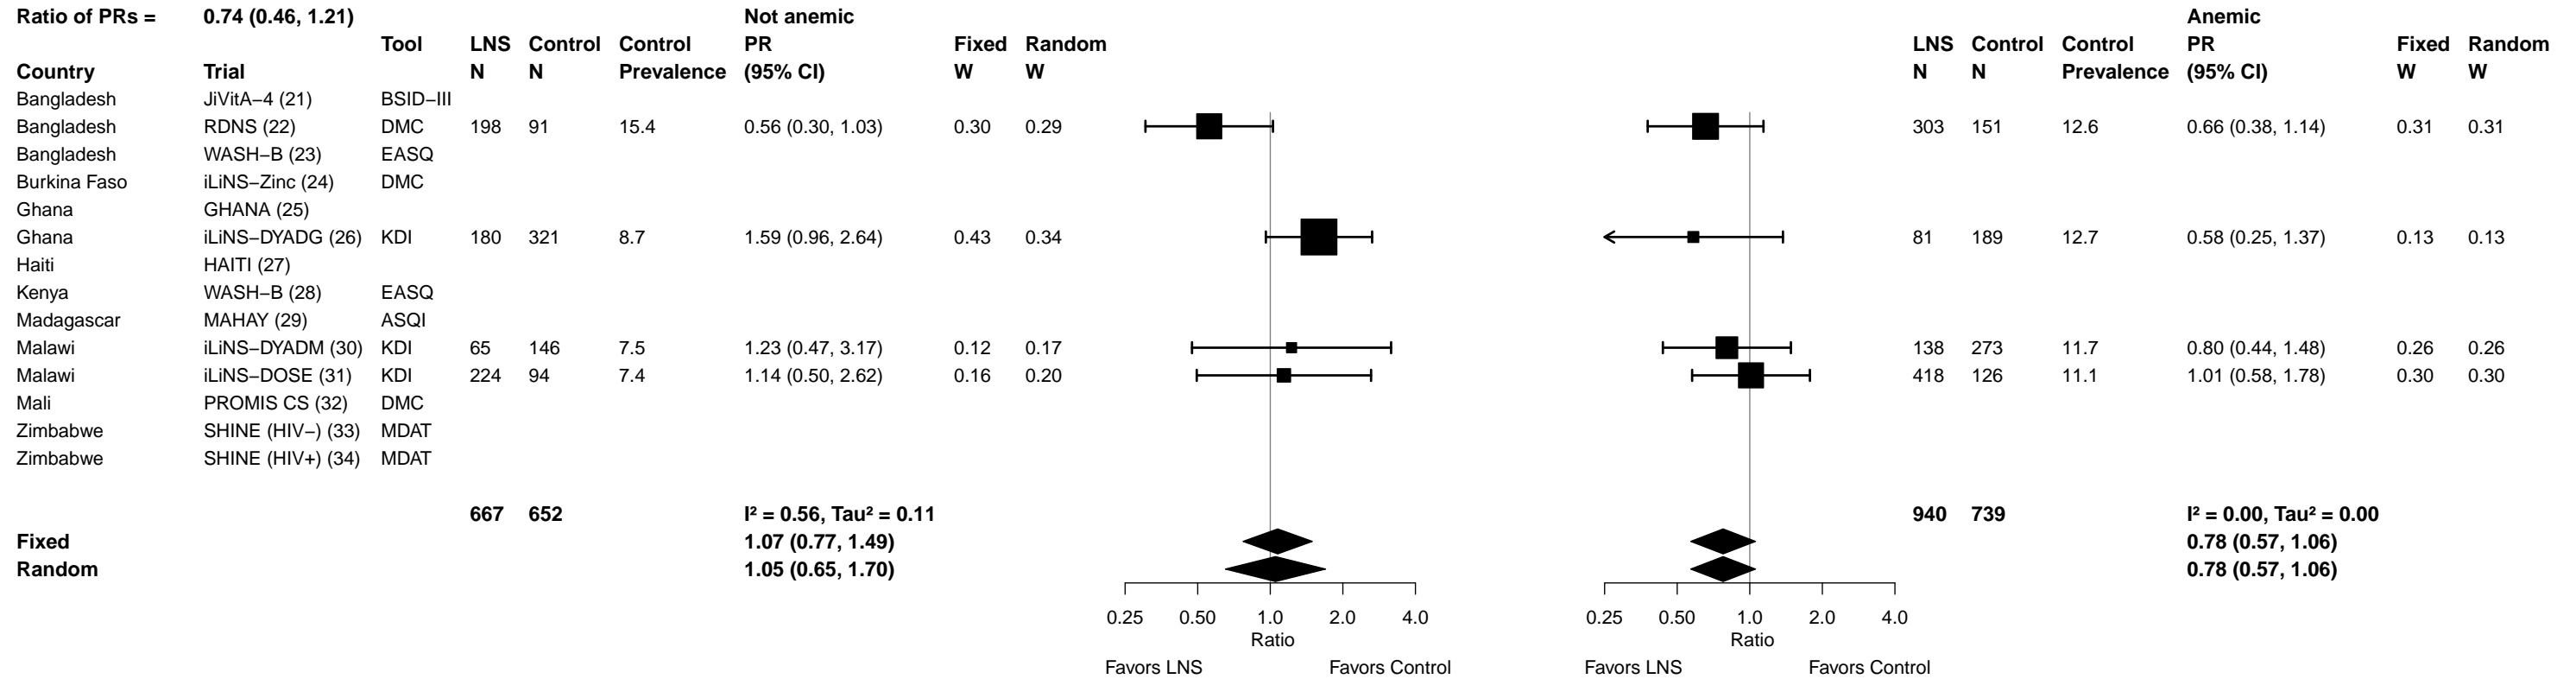

### Supplemental figure 5I: Motor lowest decile prevalence difference

#### 5I1: Stratified by Maternal height

P-for-interaction = 0.752  
 Difference in PDs = 0.00 (-0.02, 0.03)

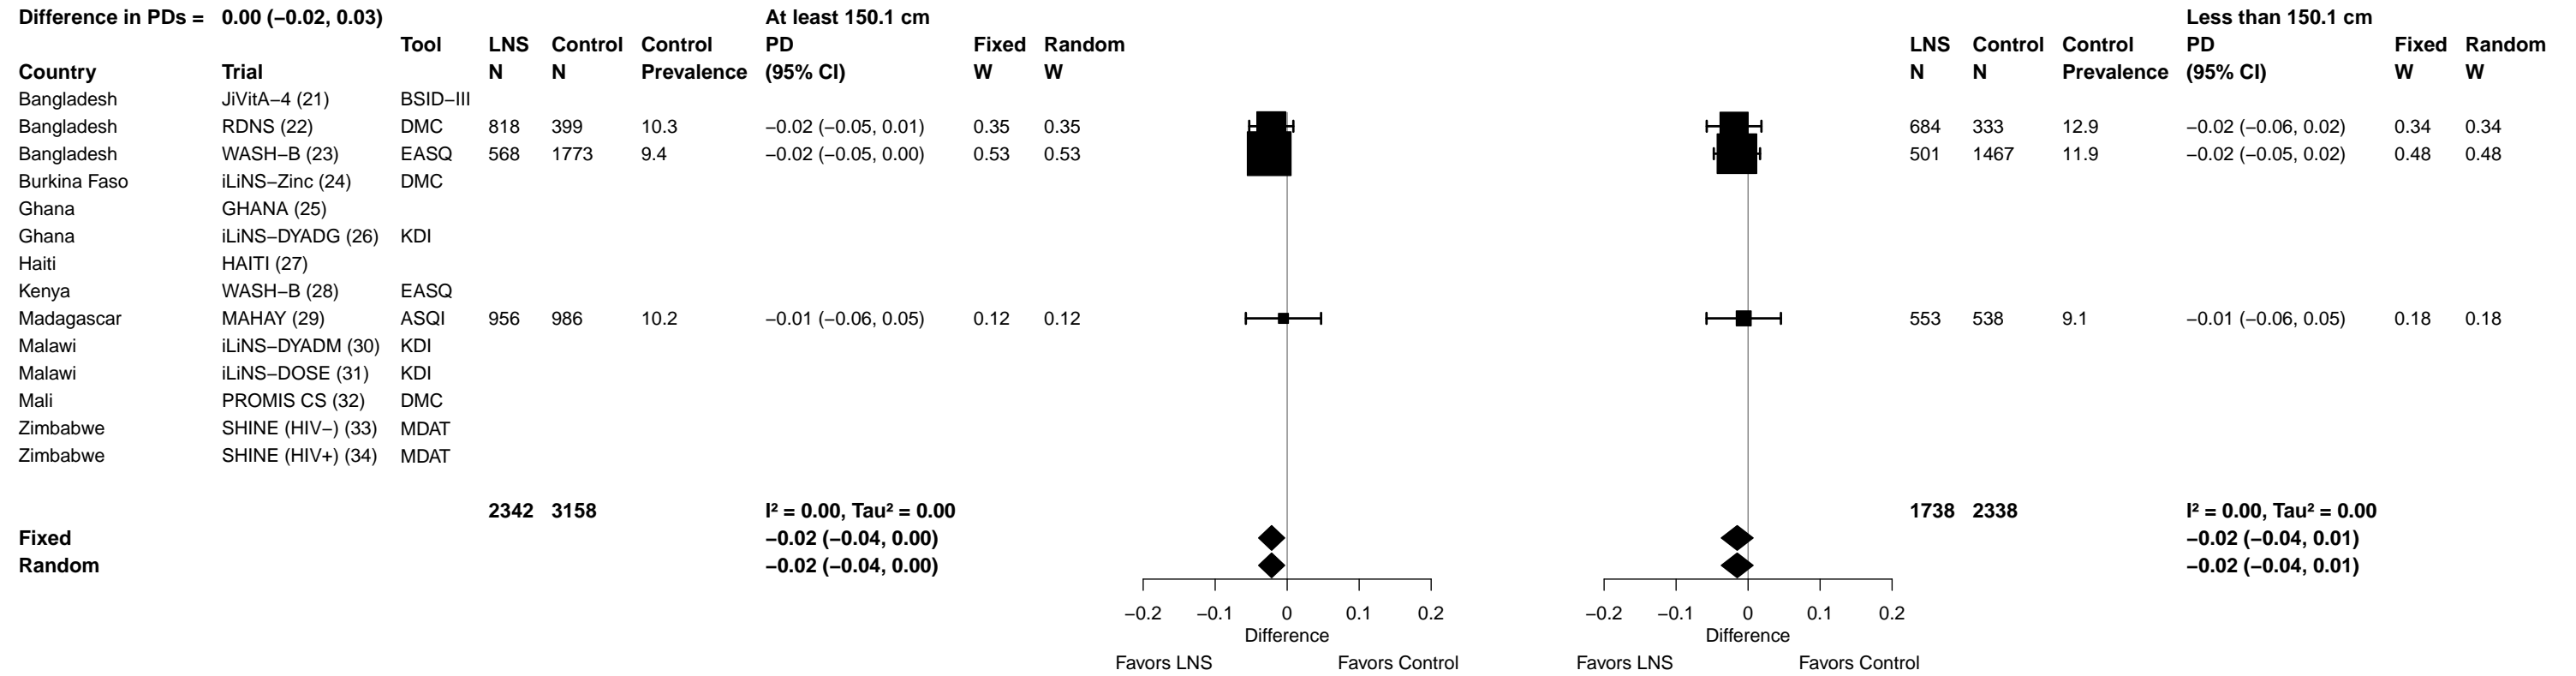

Supplemental figure 5I: Motor lowest decile prevalence difference

5I2: Stratified by Maternal BMI

P-for-interaction = 0.721  
 Difference in PDs = 0.00 (-0.02, 0.03)

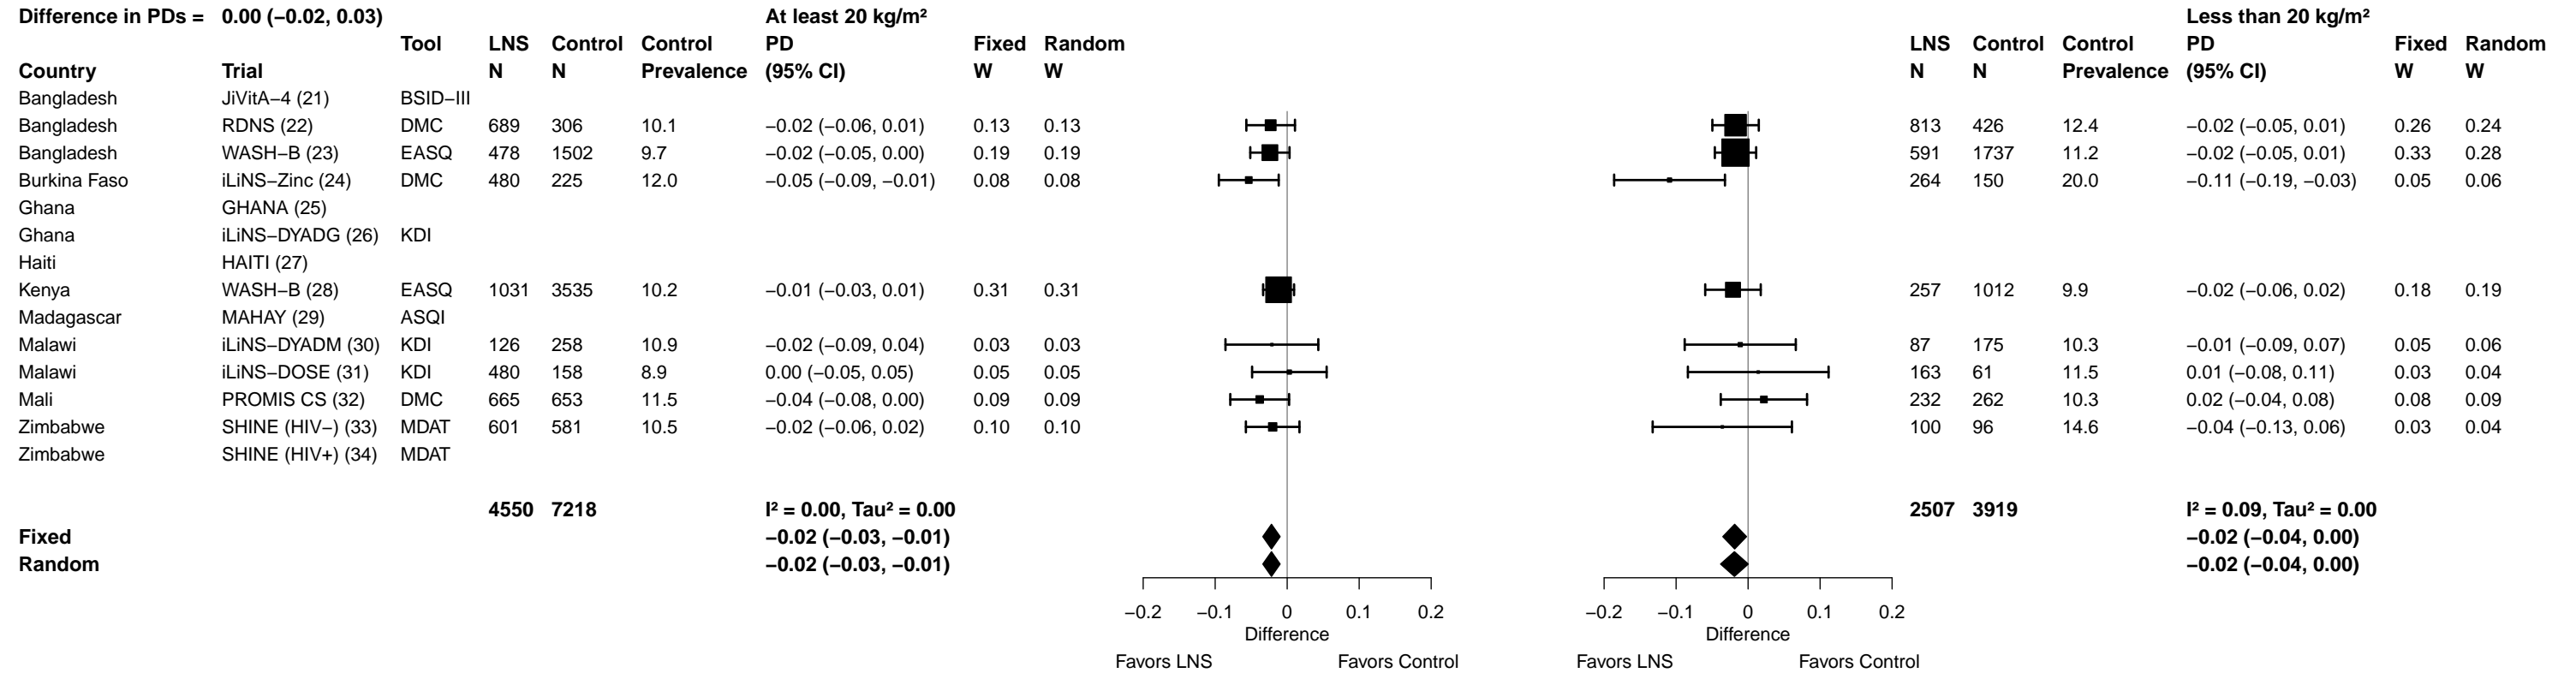

Supplemental figure 5I: Motor lowest decile prevalence difference

5I3: Stratified by Maternal age

P-for-interaction = 0.555

Difference in PDs = 0.01 (-0.01, 0.02)

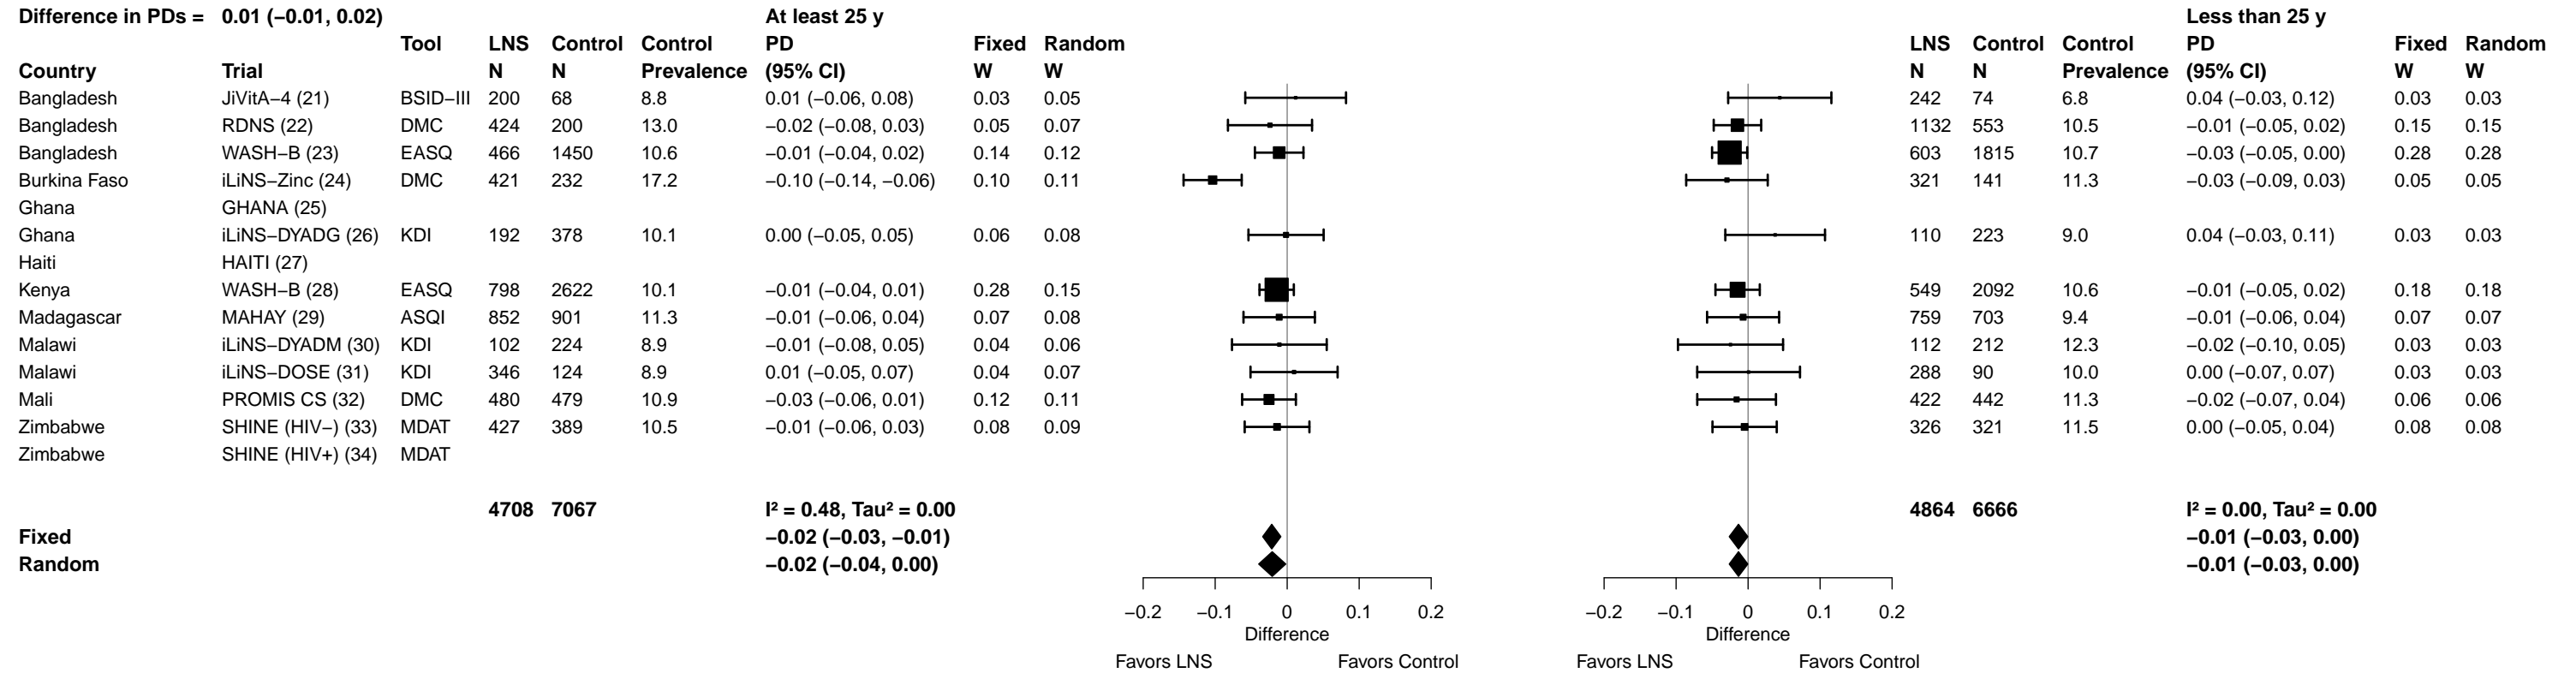

Supplemental figure 5I: Motor lowest decile prevalence difference

5I4: Stratified by Maternal education

P-for-interaction = 0.095  
 Difference in PDs = -0.02 (-0.04, 0.00)

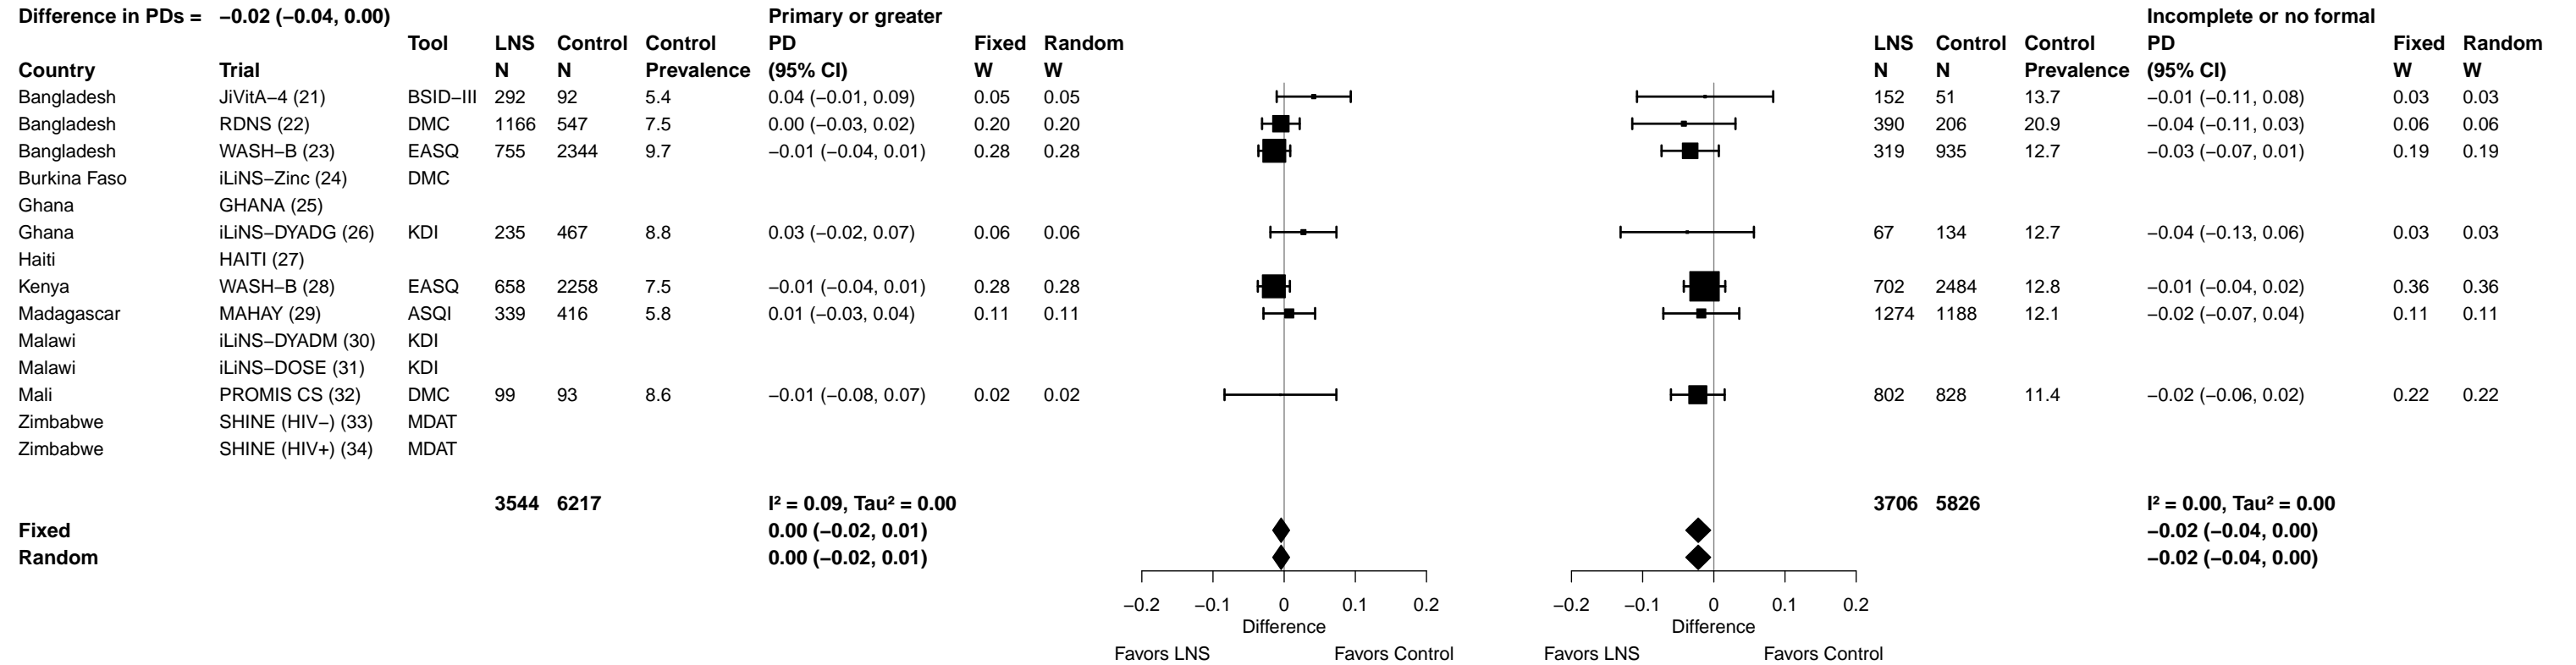

Supplemental figure 5I: Motor lowest decile prevalence difference

5I5: Stratified by Maternal depressive symptoms

P-for-interaction = 0.603

Difference in PDs = 0.01 (-0.02, 0.03)

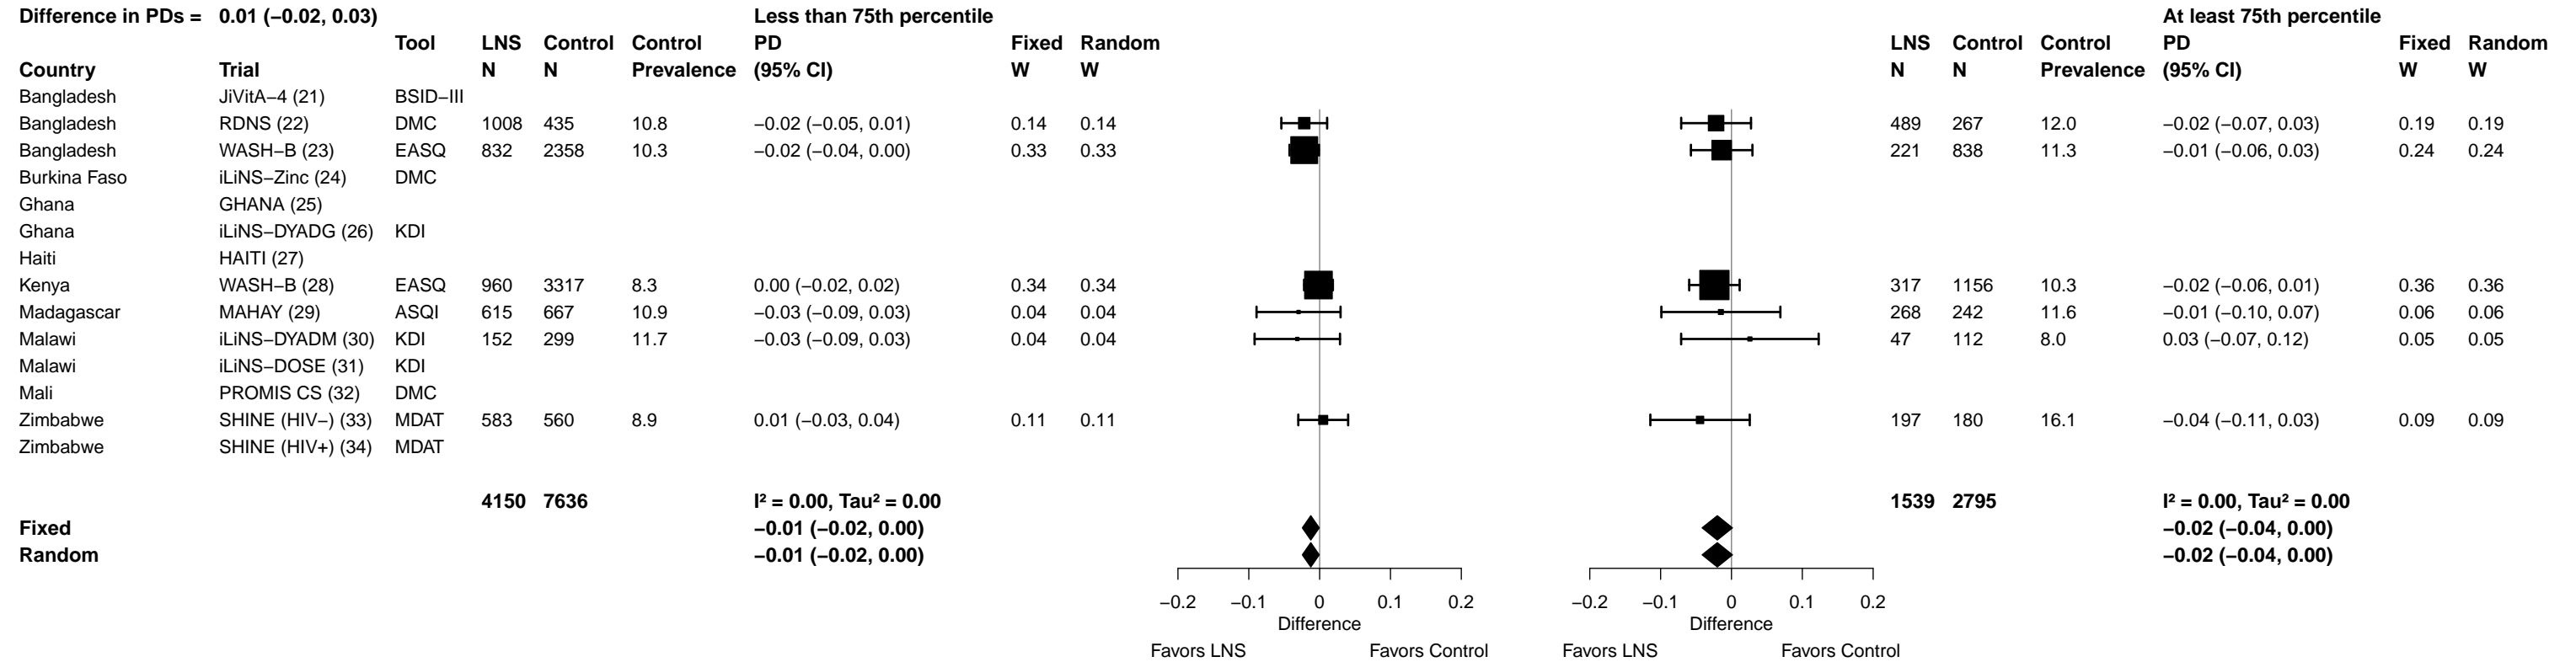

Supplemental figure 5I: Motor lowest decile prevalence difference

5I6: Stratified by Child sex

P-for-interaction = 0.917  
 Difference in PDs = 0.00 (-0.02, 0.02)

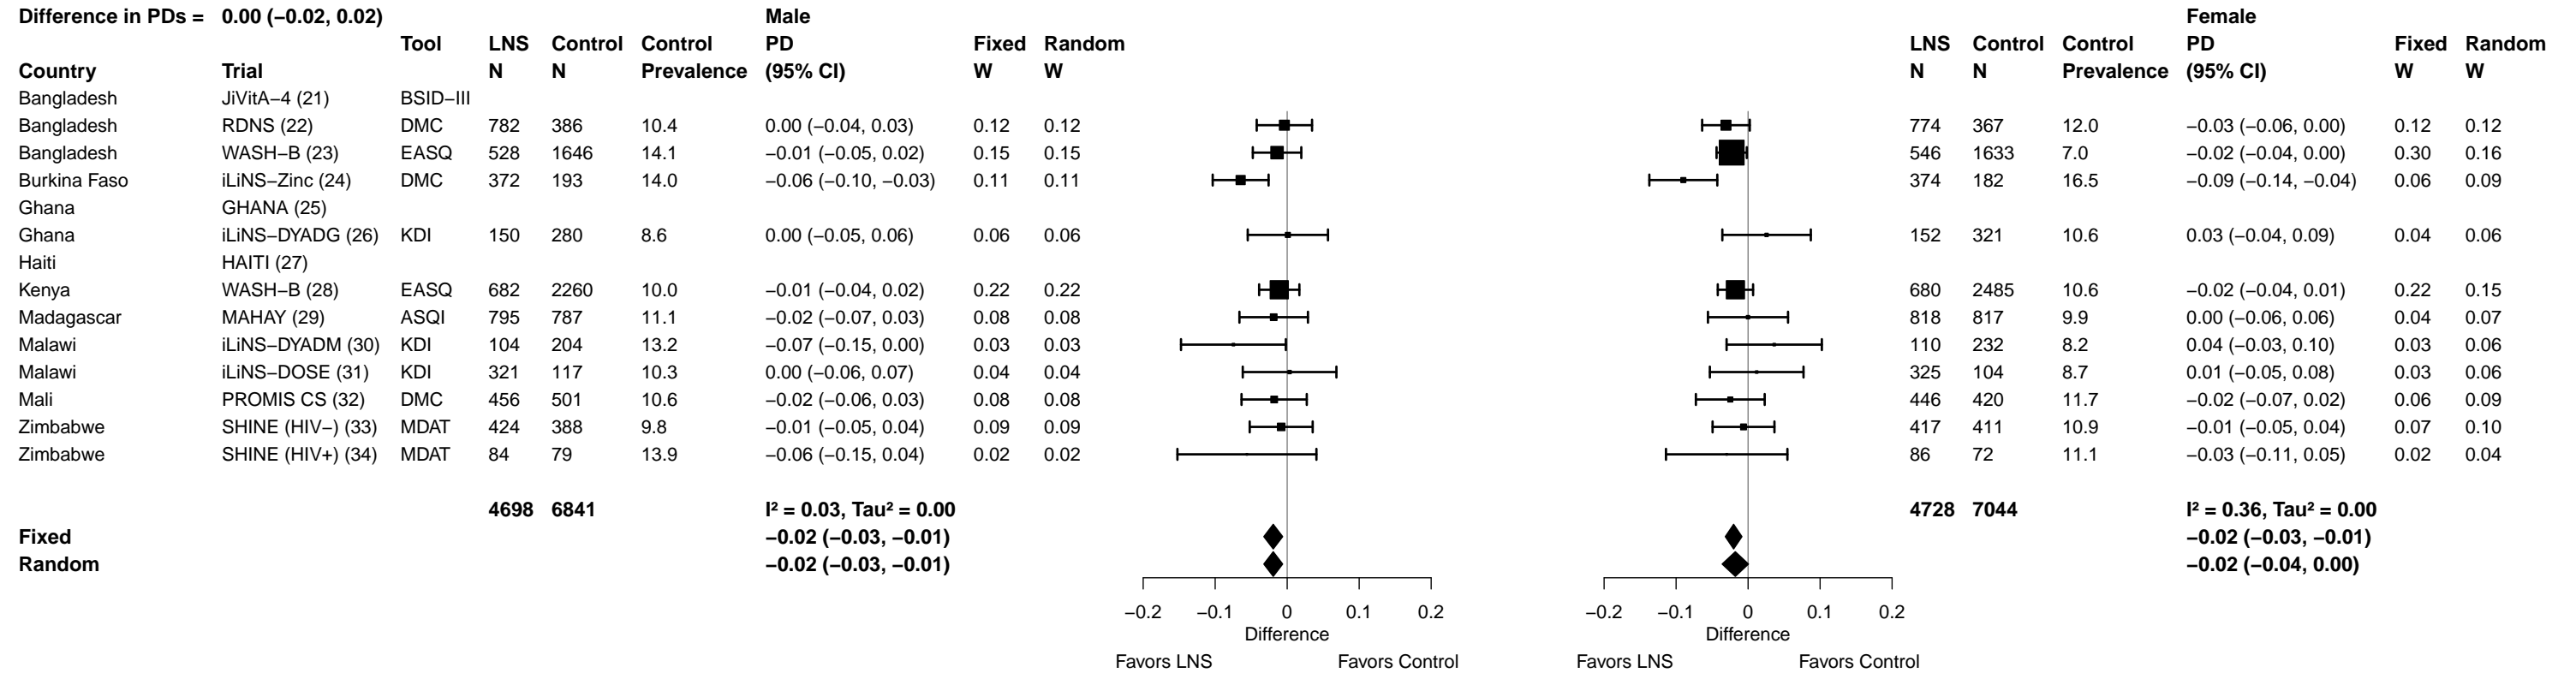

Supplemental figure 5I: Motor lowest decile prevalence difference

5I7: Stratified by Child birth order

**P-for-interaction = 0.035**  
**Difference in PDs = 0.02 (0.00, 0.04)**

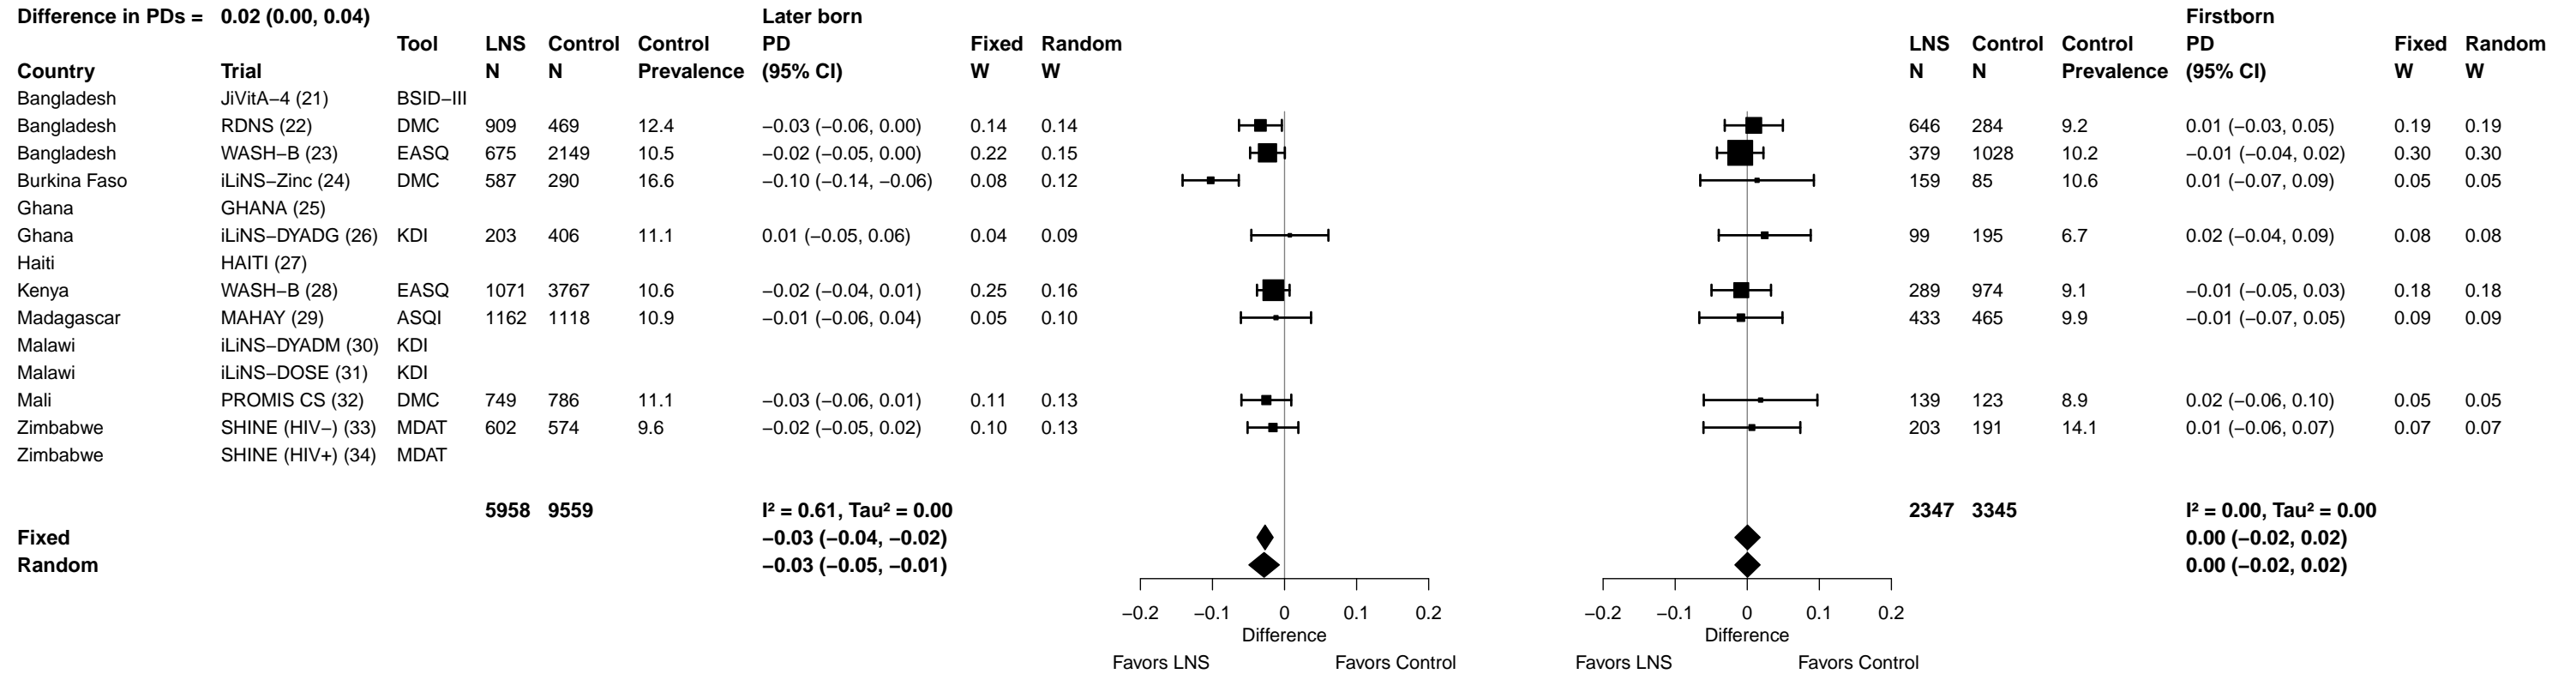



Supplemental figure 5I: Motor lowest decile prevalence difference

5I8: Stratified by Child baseline stunting

P-for-interaction = 0.226  
 Difference in PDs = -0.03 (-0.07, 0.02)

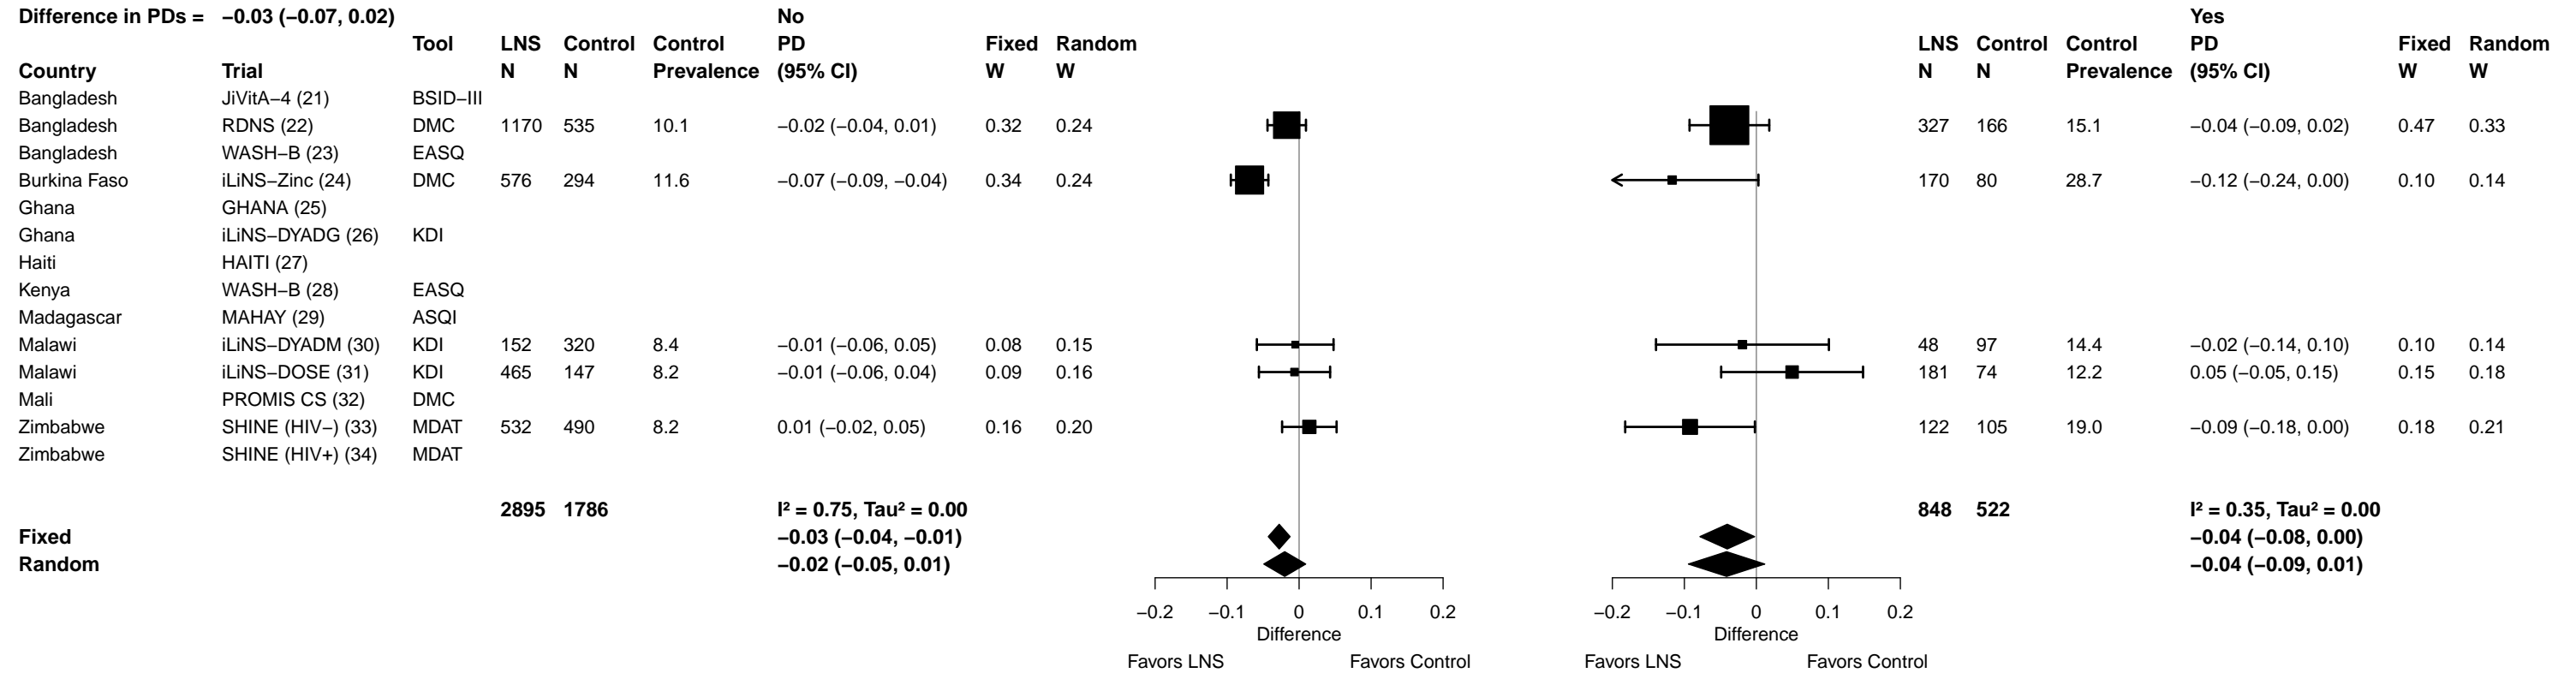

Supplemental figure 5I: Motor lowest decile prevalence difference

5I9: Stratified by Child baseline acute malnutrition

P-for-interaction = 0.540  
 Difference in PDs = -0.02 (-0.09, 0.05)

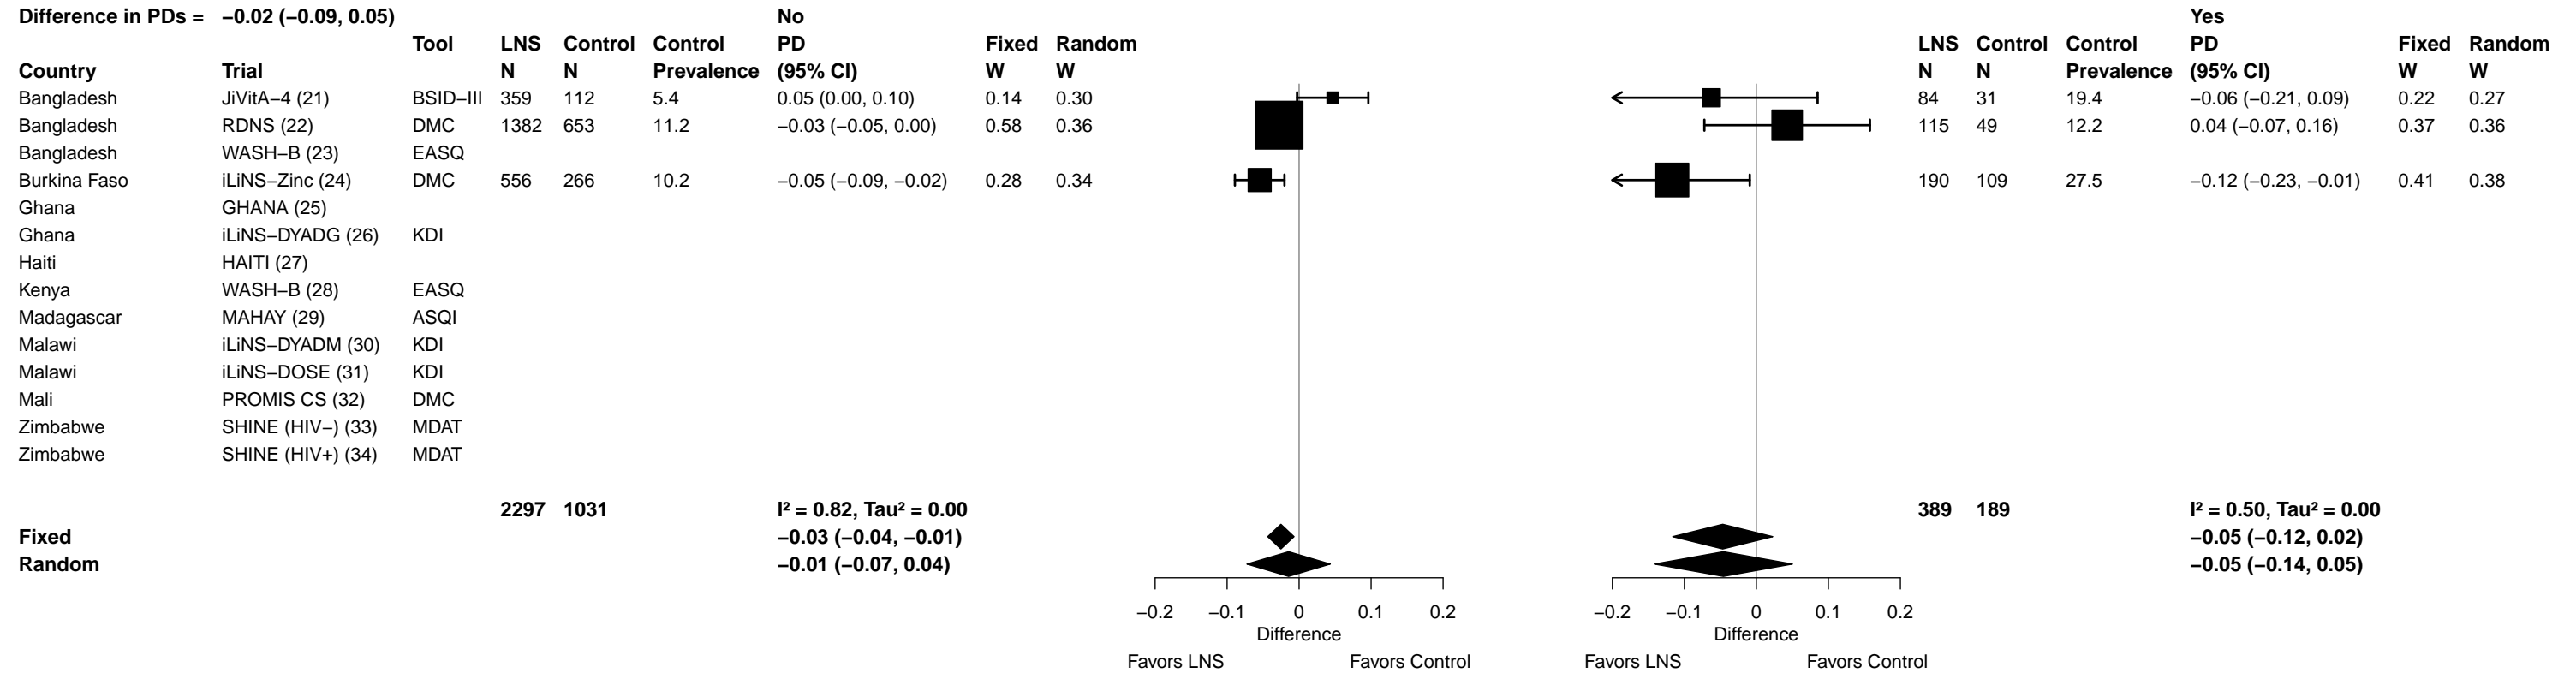

Supplemental figure 5I: Motor lowest decile prevalence difference

5I10: Stratified by Child baseline anemia

P-for-interaction = 0.177  
 Difference in PDs = -0.03 (-0.08, 0.02)

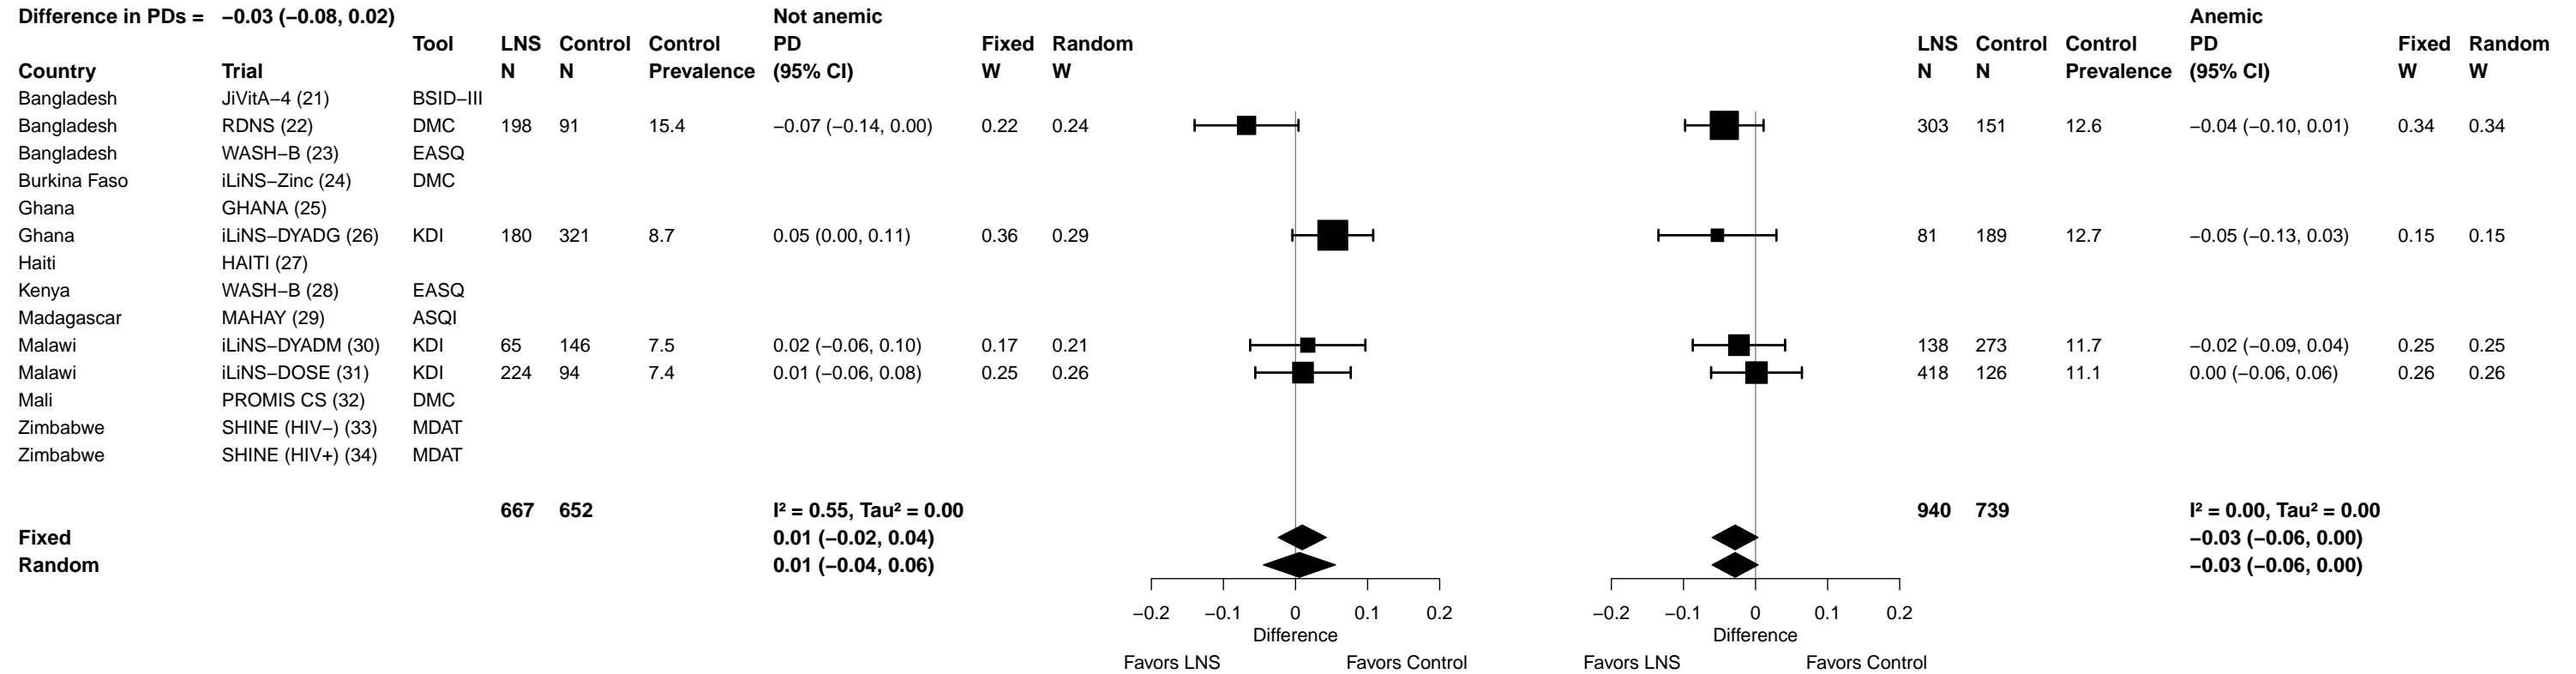

### Supplemental figure 5J: Mean difference in gross motor z-score

#### 5J1: Stratified by Maternal height

P-for-interaction = 0.787

Difference in MDs = -0.01 (-0.09, 0.06)

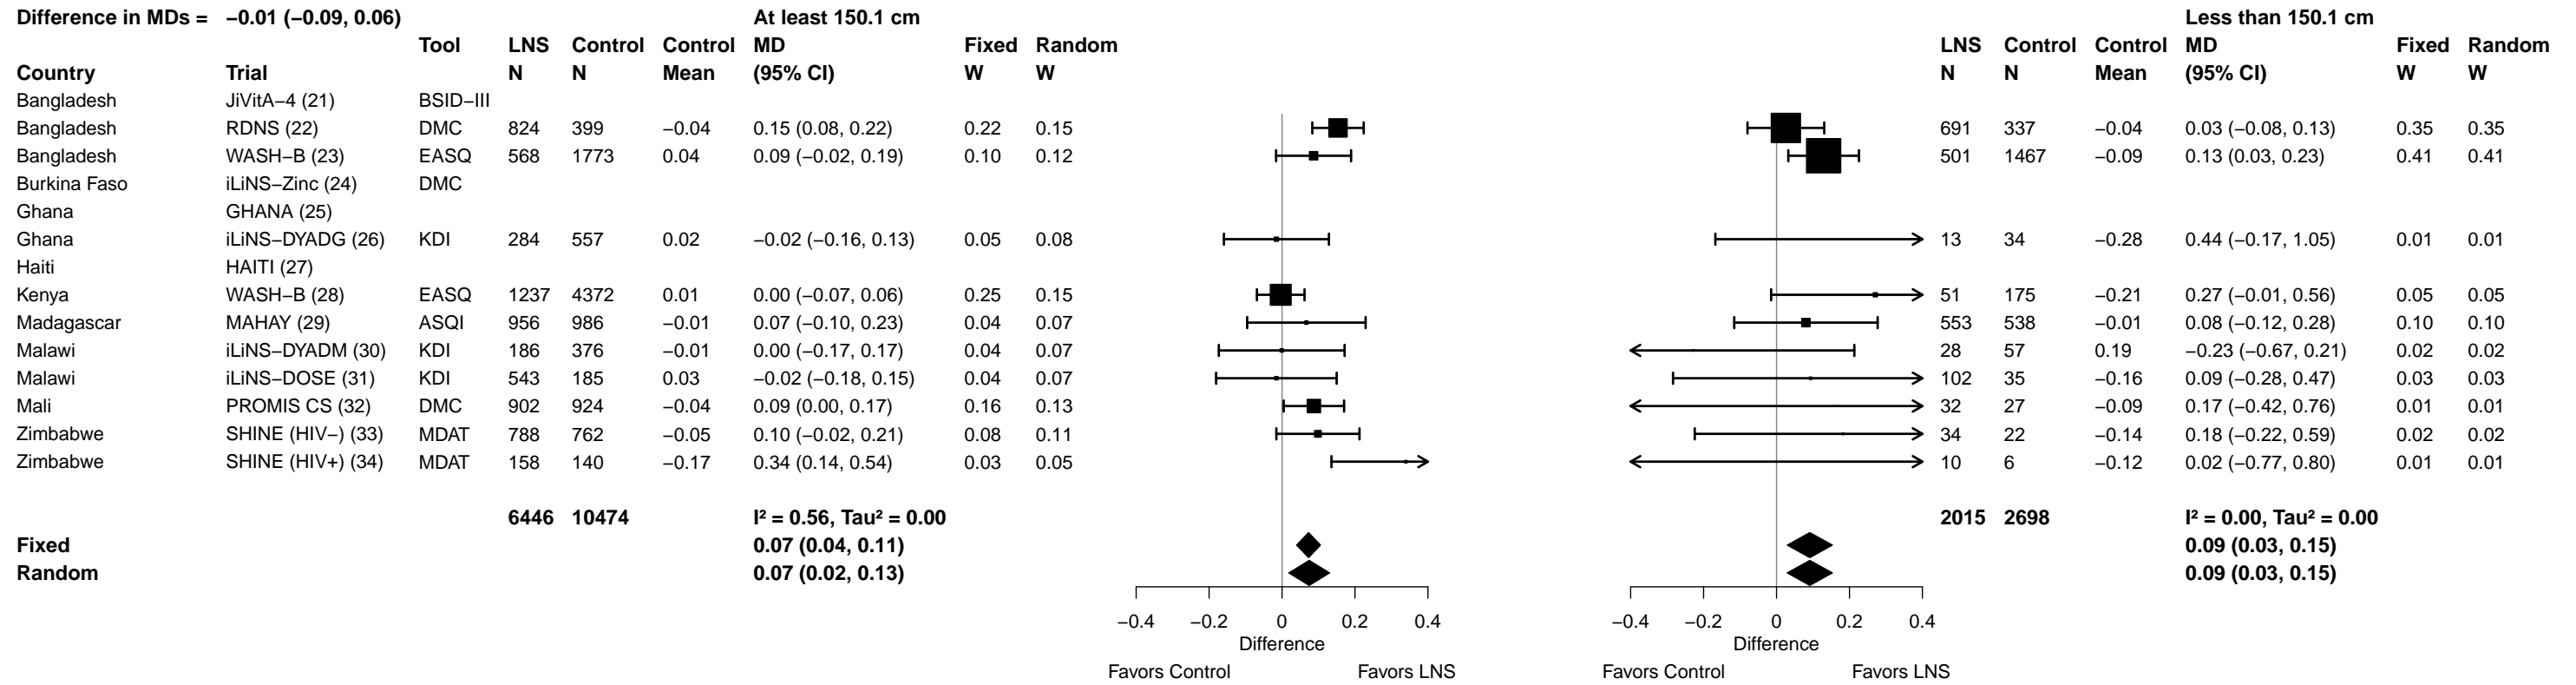

Supplemental figure 5J: Mean difference in gross motor z-score

5J2: Stratified by Maternal BMI

P-for-interaction = 0.642  
 Difference in MDs = 0.01 (-0.05, 0.08)

| Country      | Trial             | Tool     |       |           | At least 20 kg/m <sup>2</sup> |                     | Fixed W | Random W |       |           | Less than 20 kg/m <sup>2</sup> |                     | Fixed W | Random W |
|--------------|-------------------|----------|-------|-----------|-------------------------------|---------------------|---------|----------|-------|-----------|--------------------------------|---------------------|---------|----------|
|              |                   |          | LNS N | Control N | Control Mean                  | MD (95% CI)         |         |          | LNS N | Control N | Control Mean                   | MD (95% CI)         |         |          |
| Bangladesh   | JiVitA-4 (21)     | BSID-III |       |           |                               |                     |         |          |       |           |                                |                     |         |          |
| Bangladesh   | RDNS (22)         | DMC      | 693   | 308       | -0.01                         | 0.09 (0.00, 0.18)   | 0.17    | 0.15     | 822   | 428       | -0.06                          | 0.09 (0.02, 0.17)   | 0.40    | 0.40     |
| Bangladesh   | WASH-B (23)       | EASQ     | 478   | 1502      | 0.05                          | 0.09 (-0.02, 0.19)  | 0.13    | 0.14     | 591   | 1737      | -0.09                          | 0.12 (0.03, 0.22)   | 0.24    | 0.24     |
| Burkina Faso | iLiNS-Zinc (24)   | DMC      |       |           |                               |                     |         |          |       |           |                                |                     |         |          |
| Ghana        | GHANA (25)        |          |       |           |                               |                     |         |          |       |           |                                |                     |         |          |
| Ghana        | iLiNS-DYADG (26)  | KDI      | 262   | 485       | 0.01                          | 0.02 (-0.13, 0.17)  | 0.06    | 0.09     | 35    | 106       | -0.03                          | -0.09 (-0.48, 0.30) | 0.01    | 0.01     |
| Haiti        | HAITI (27)        |          |       |           |                               |                     |         |          |       |           |                                |                     |         |          |
| Kenya        | WASH-B (28)       | EASQ     | 1031  | 3535      | 0.01                          | -0.02 (-0.09, 0.05) | 0.30    | 0.18     | 257   | 1012      | -0.04                          | 0.12 (-0.02, 0.27)  | 0.11    | 0.11     |
| Madagascar   | MAHAY (29)        | ASQI     |       |           |                               |                     |         |          |       |           |                                |                     |         |          |
| Malawi       | iLiNS-DYADM (30)  | KDI      | 126   | 258       | -0.05                         | 0.00 (-0.23, 0.23)  | 0.03    | 0.05     | 87    | 175       | 0.12                           | -0.08 (-0.28, 0.13) | 0.05    | 0.05     |
| Malawi       | iLiNS-DOSE (31)   | KDI      | 480   | 158       | 0.02                          | 0.01 (-0.16, 0.18)  | 0.05    | 0.08     | 163   | 61        | -0.06                          | -0.01 (-0.33, 0.31) | 0.02    | 0.02     |
| Mali         | PROMIS CS (32)    | DMC      | 693   | 676       | -0.07                         | 0.12 (0.02, 0.22)   | 0.14    | 0.14     | 241   | 275       | 0.01                           | 0.01 (-0.12, 0.15)  | 0.12    | 0.12     |
| Zimbabwe     | SHINE (HIV-) (33) | MDAT     | 601   | 581       | -0.04                         | 0.11 (-0.02, 0.24)  | 0.09    | 0.11     | 100   | 96        | -0.18                          | 0.19 (-0.07, 0.44)  | 0.03    | 0.03     |
| Zimbabwe     | SHINE (HIV+) (34) | MDAT     | 124   | 113       | -0.13                         | 0.35 (0.13, 0.58)   | 0.03    | 0.05     | 25    | 23        | -0.42                          | 0.27 (-0.16, 0.69)  | 0.01    | 0.01     |

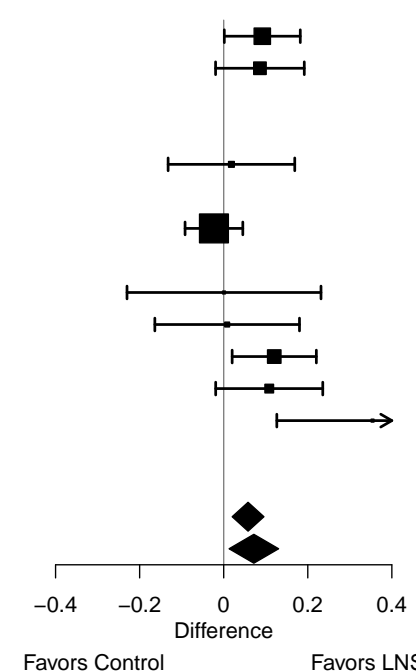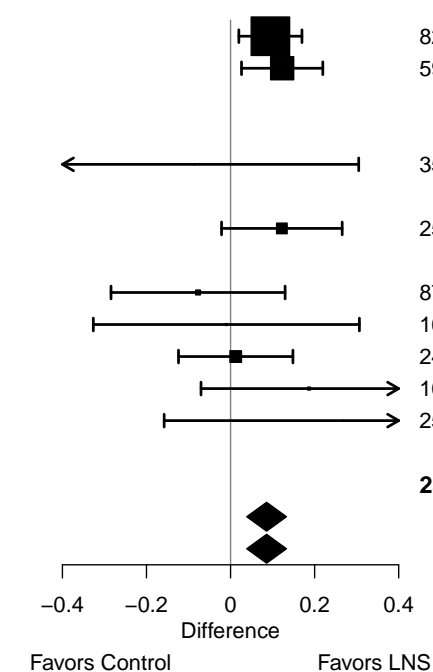

Fixed  
 Random

**I<sup>2</sup> = 0.49, Tau<sup>2</sup> = 0.00**  
**0.06 (0.02, 0.10)**  
**0.07 (0.01, 0.13)**

**I<sup>2</sup> = 0.00, Tau<sup>2</sup> = 0.00**  
**0.09 (0.04, 0.13)**  
**0.09 (0.04, 0.13)**

Supplemental figure 5J: Mean difference in gross motor z-score

5J3: Stratified by Maternal age

P-for-interaction = 0.610

Difference in MDs = -0.02 (-0.07, 0.04)

| Country      | Trial             | Tool     | LNS<br>N | Control<br>N | Control<br>Mean | At least 25 y       |  | Fixed<br>W | Random<br>W |
|--------------|-------------------|----------|----------|--------------|-----------------|---------------------|--|------------|-------------|
|              |                   |          |          |              |                 | MD<br>(95% CI)      |  |            |             |
| Bangladesh   | JiVitA-4 (21)     | BSID-III | 200      | 68           | 0.08            | -0.07 (-0.29, 0.14) |  | 0.04       | 0.06        |
| Bangladesh   | RDNS (22)         | DMC      | 426      | 202          | -0.12           | 0.12 (-0.03, 0.26)  |  | 0.08       | 0.10        |
| Bangladesh   | WASH-B (23)       | EASQ     | 466      | 1450         | -0.02           | 0.09 (-0.03, 0.20)  |  | 0.14       | 0.13        |
| Burkina Faso | iLiNS-Zinc (24)   | DMC      |          |              |                 |                     |  |            |             |
| Ghana        | GHANA (25)        |          |          |              |                 |                     |  |            |             |
| Ghana        | iLiNS-DYADG (26)  | KDI      | 192      | 378          | -0.02           | 0.07 (-0.10, 0.24)  |  | 0.06       | 0.08        |
| Haiti        | HAITI (27)        |          |          |              |                 |                     |  |            |             |
| Kenya        | WASH-B (28)       | EASQ     | 798      | 2622         | 0.04            | -0.02 (-0.10, 0.05) |  | 0.30       | 0.18        |
| Madagascar   | MAHAY (29)        | ASQI     | 852      | 901          | -0.09           | 0.09 (-0.08, 0.25)  |  | 0.07       | 0.08        |
| Malawi       | iLiNS-DYADM (30)  | KDI      | 102      | 224          | 0.06            | -0.05 (-0.28, 0.18) |  | 0.03       | 0.05        |
| Malawi       | iLiNS-DOSE (31)   | KDI      | 346      | 124          | -0.06           | 0.06 (-0.15, 0.26)  |  | 0.04       | 0.06        |
| Mali         | PROMIS CS (32)    | DMC      | 495      | 500          | -0.08           | 0.15 (0.03, 0.27)   |  | 0.12       | 0.12        |
| Zimbabwe     | SHINE (HIV-) (33) | MDAT     | 427      | 389          | -0.02           | 0.15 (0.00, 0.30)   |  | 0.08       | 0.10        |
| Zimbabwe     | SHINE (HIV+) (34) | MDAT     | 126      | 111          | -0.15           | 0.31 (0.09, 0.54)   |  | 0.04       | 0.05        |

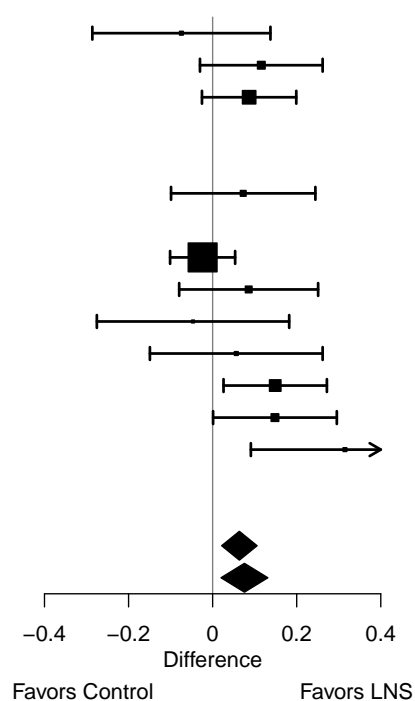

$I^2 = 0.38, \text{Tau}^2 = 0.00$   
**0.06 (0.02, 0.11)**  
**0.08 (0.02, 0.13)**

Fixed  
Random

| LNS<br>N | Control<br>N | Control<br>Mean | Less than 25 y      |      | Fixed<br>W | Random<br>W |
|----------|--------------|-----------------|---------------------|------|------------|-------------|
|          |              |                 | MD<br>(95% CI)      |      |            |             |
| 242      | 74           | 0.12            | -0.15 (-0.44, 0.14) | 0.02 | 0.02       |             |
| 1144     | 556          | 0.00            | 0.07 (0.00, 0.15)   | 0.30 | 0.26       |             |
| 603      | 1815         | -0.03           | 0.11 (0.03, 0.20)   | 0.22 | 0.21       |             |
| 110      | 223          | 0.02            | -0.10 (-0.33, 0.14) | 0.03 | 0.03       |             |
| 549      | 2092         | -0.05           | 0.05 (-0.05, 0.16)  | 0.15 | 0.15       |             |
| 759      | 703          | 0.03            | 0.06 (-0.11, 0.23)  | 0.06 | 0.06       |             |
| 112      | 212          | -0.03           | -0.01 (-0.24, 0.21) | 0.03 | 0.04       |             |
| 288      | 90           | 0.08            | -0.07 (-0.29, 0.16) | 0.03 | 0.04       |             |
| 445      | 457          | 0.00            | 0.02 (-0.11, 0.14)  | 0.10 | 0.10       |             |
| 326      | 321          | -0.11           | 0.09 (-0.06, 0.25)  | 0.07 | 0.07       |             |
| 29       | 26           | -0.27           | 0.63 (-0.01, 1.26)  | 0.00 | 0.00       |             |

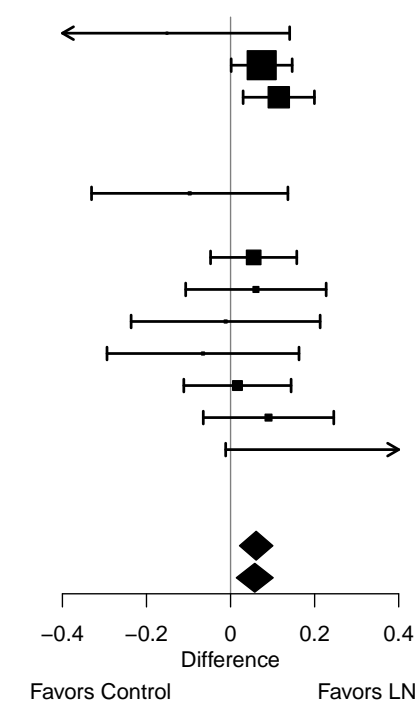

$I^2 = 0.06, \text{Tau}^2 = 0.00$   
**0.06 (0.02, 0.10)**  
**0.06 (0.01, 0.10)**

Supplemental figure 5J: Mean difference in gross motor z-score

5J4: Stratified by Maternal education

P-for-interaction = 0.104  
 Difference in MDs = 0.06 (-0.01, 0.13)

| Country      | Trial             | Tool     | LNS N       | Control N   | Control Mean                                        | MD (95% CI)          | Primary or greater |          |
|--------------|-------------------|----------|-------------|-------------|-----------------------------------------------------|----------------------|--------------------|----------|
|              |                   |          |             |             |                                                     |                      | Fixed W            | Random W |
| Bangladesh   | JiVitA-4 (21)     | BSID-III | 292         | 92          | 0.24                                                | -0.19 (-0.37, -0.01) | 0.04               | 0.09     |
| Bangladesh   | RDNS (22)         | DMC      | 1178        | 549         | 0.03                                                | 0.09 (0.02, 0.15)    | 0.31               | 0.14     |
| Bangladesh   | WASH-B (23)       | EASQ     | 755         | 2344        | 0.04                                                | 0.08 (0.00, 0.17)    | 0.20               | 0.13     |
| Burkina Faso | iLiNS-Zinc (24)   | DMC      |             |             |                                                     |                      |                    |          |
| Ghana        | GHANA (25)        |          |             |             |                                                     |                      |                    |          |
| Ghana        | iLiNS-DYADG (26)  | KDI      | 235         | 467         | -0.01                                               | 0.00 (-0.15, 0.15)   | 0.06               | 0.10     |
| Haiti        | HAITI (27)        |          |             |             |                                                     |                      |                    |          |
| Kenya        | WASH-B (28)       | EASQ     | 658         | 2258        | 0.11                                                | -0.01 (-0.10, 0.08)  | 0.16               | 0.13     |
| Madagascar   | MAHAY (29)        | ASQI     | 339         | 416         | 0.20                                                | -0.07 (-0.26, 0.11)  | 0.04               | 0.08     |
| Malawi       | iLiNS-DYADM (30)  | KDI      | 33          | 67          | 0.06                                                | -0.04 (-0.40, 0.31)  | 0.01               | 0.04     |
| Malawi       | iLiNS-DOSE (31)   | KDI      | 148         | 52          | 0.22                                                | -0.04 (-0.29, 0.20)  | 0.02               | 0.06     |
| Mali         | PROMIS CS (32)    | DMC      | 103         | 96          | 0.11                                                | -0.04 (-0.34, 0.25)  | 0.02               | 0.05     |
| Zimbabwe     | SHINE (HIV-) (33) | MDAT     | 763         | 731         | -0.05                                               | 0.12 (0.01, 0.24)    | 0.11               | 0.12     |
| Zimbabwe     | SHINE (HIV+) (34) | MDAT     | 149         | 130         | -0.16                                               | 0.37 (0.17, 0.57)    | 0.03               | 0.08     |
|              |                   |          | <b>4653</b> | <b>7202</b> |                                                     |                      |                    |          |
|              |                   |          |             |             | <b>I<sup>2</sup> = 0.60, Tau<sup>2</sup> = 0.01</b> |                      |                    |          |
|              |                   |          |             |             | <b>0.06 (0.02, 0.09)</b>                            |                      |                    |          |
|              |                   |          |             |             | <b>0.04 (-0.04, 0.12)</b>                           |                      |                    |          |
|              |                   |          |             |             |                                                     |                      | <b>Fixed</b>       |          |
|              |                   |          |             |             |                                                     |                      | <b>Random</b>      |          |

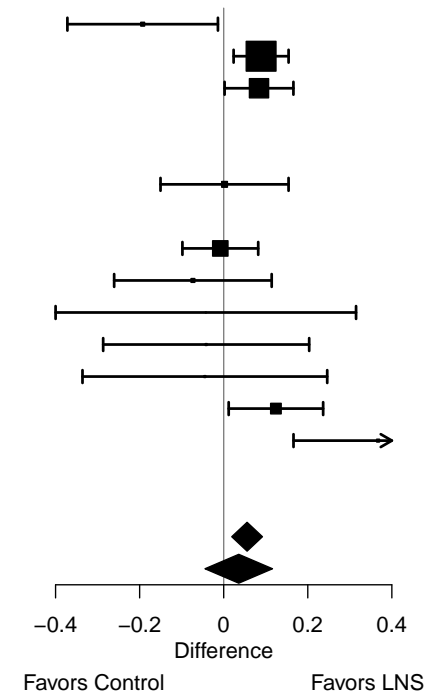

| Country      | Trial             | Tool     | LNS N       | Control N   | Control Mean                                        | MD (95% CI)         | Incomplete or no formal |          |
|--------------|-------------------|----------|-------------|-------------|-----------------------------------------------------|---------------------|-------------------------|----------|
|              |                   |          |             |             |                                                     |                     | Fixed W                 | Random W |
| Bangladesh   | JiVitA-4 (21)     | BSID-III | 152         | 51          | -0.19                                               | 0.06 (-0.29, 0.40)  | 0.02                    | 0.02     |
| Bangladesh   | RDNS (22)         | DMC      | 392         | 209         | -0.19                                               | 0.05 (-0.11, 0.21)  | 0.08                    | 0.08     |
| Bangladesh   | WASH-B (23)       | EASQ     | 319         | 935         | -0.17                                               | 0.16 (0.04, 0.29)   | 0.13                    | 0.13     |
| Burkina Faso | iLiNS-Zinc (24)   | DMC      |             |             |                                                     |                     |                         |          |
| Ghana        | GHANA (25)        |          |             |             |                                                     |                     |                         |          |
| Ghana        | iLiNS-DYADG (26)  | KDI      | 67          | 134         | 0.00                                                | 0.04 (-0.28, 0.36)  | 0.02                    | 0.02     |
| Haiti        | HAITI (27)        |          |             |             |                                                     |                     |                         |          |
| Kenya        | WASH-B (28)       | EASQ     | 702         | 2484        | -0.11                                               | 0.02 (-0.07, 0.12)  | 0.23                    | 0.23     |
| Madagascar   | MAHAY (29)        | ASQI     | 1274        | 1188        | -0.12                                               | 0.13 (-0.02, 0.29)  | 0.08                    | 0.08     |
| Malawi       | iLiNS-DYADM (30)  | KDI      | 180         | 366         | 0.01                                                | -0.04 (-0.21, 0.14) | 0.06                    | 0.06     |
| Malawi       | iLiNS-DOSE (31)   | KDI      | 487         | 162         | -0.07                                               | 0.02 (-0.16, 0.21)  | 0.06                    | 0.06     |
| Mali         | PROMIS CS (32)    | DMC      | 836         | 861         | -0.06                                               | 0.10 (0.02, 0.18)   | 0.30                    | 0.30     |
| Zimbabwe     | SHINE (HIV-) (33) | MDAT     | 29          | 25          | -0.02                                               | -0.26 (-0.74, 0.22) | 0.01                    | 0.01     |
| Zimbabwe     | SHINE (HIV+) (34) | MDAT     | 9           | 8           | -0.12                                               | 0.04 (-0.57, 0.65)  | 0.01                    | 0.01     |
|              |                   |          | <b>4447</b> | <b>6423</b> |                                                     |                     |                         |          |
|              |                   |          |             |             | <b>I<sup>2</sup> = 0.00, Tau<sup>2</sup> = 0.00</b> |                     |                         |          |
|              |                   |          |             |             | <b>0.07 (0.02, 0.11)</b>                            |                     |                         |          |
|              |                   |          |             |             | <b>0.07 (0.02, 0.11)</b>                            |                     |                         |          |
|              |                   |          |             |             |                                                     |                     | <b>Fixed</b>            |          |
|              |                   |          |             |             |                                                     |                     | <b>Random</b>           |          |

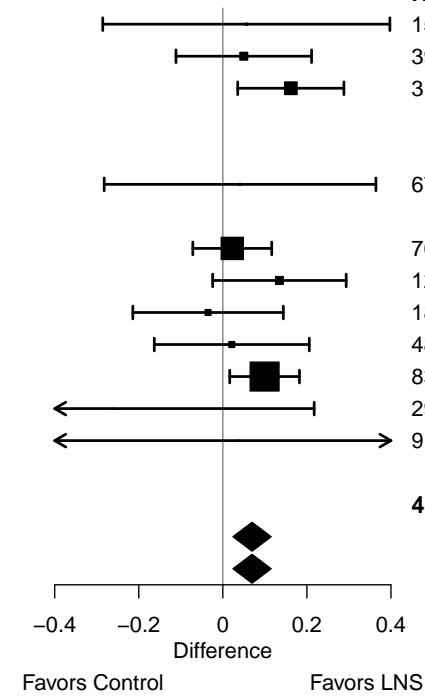

Supplemental figure 5J: Mean difference in gross motor z-score

5J5: Stratified by Maternal depressive symptoms

P-for-interaction = 0.753

Difference in MDs = -0.01 (-0.08, 0.06)

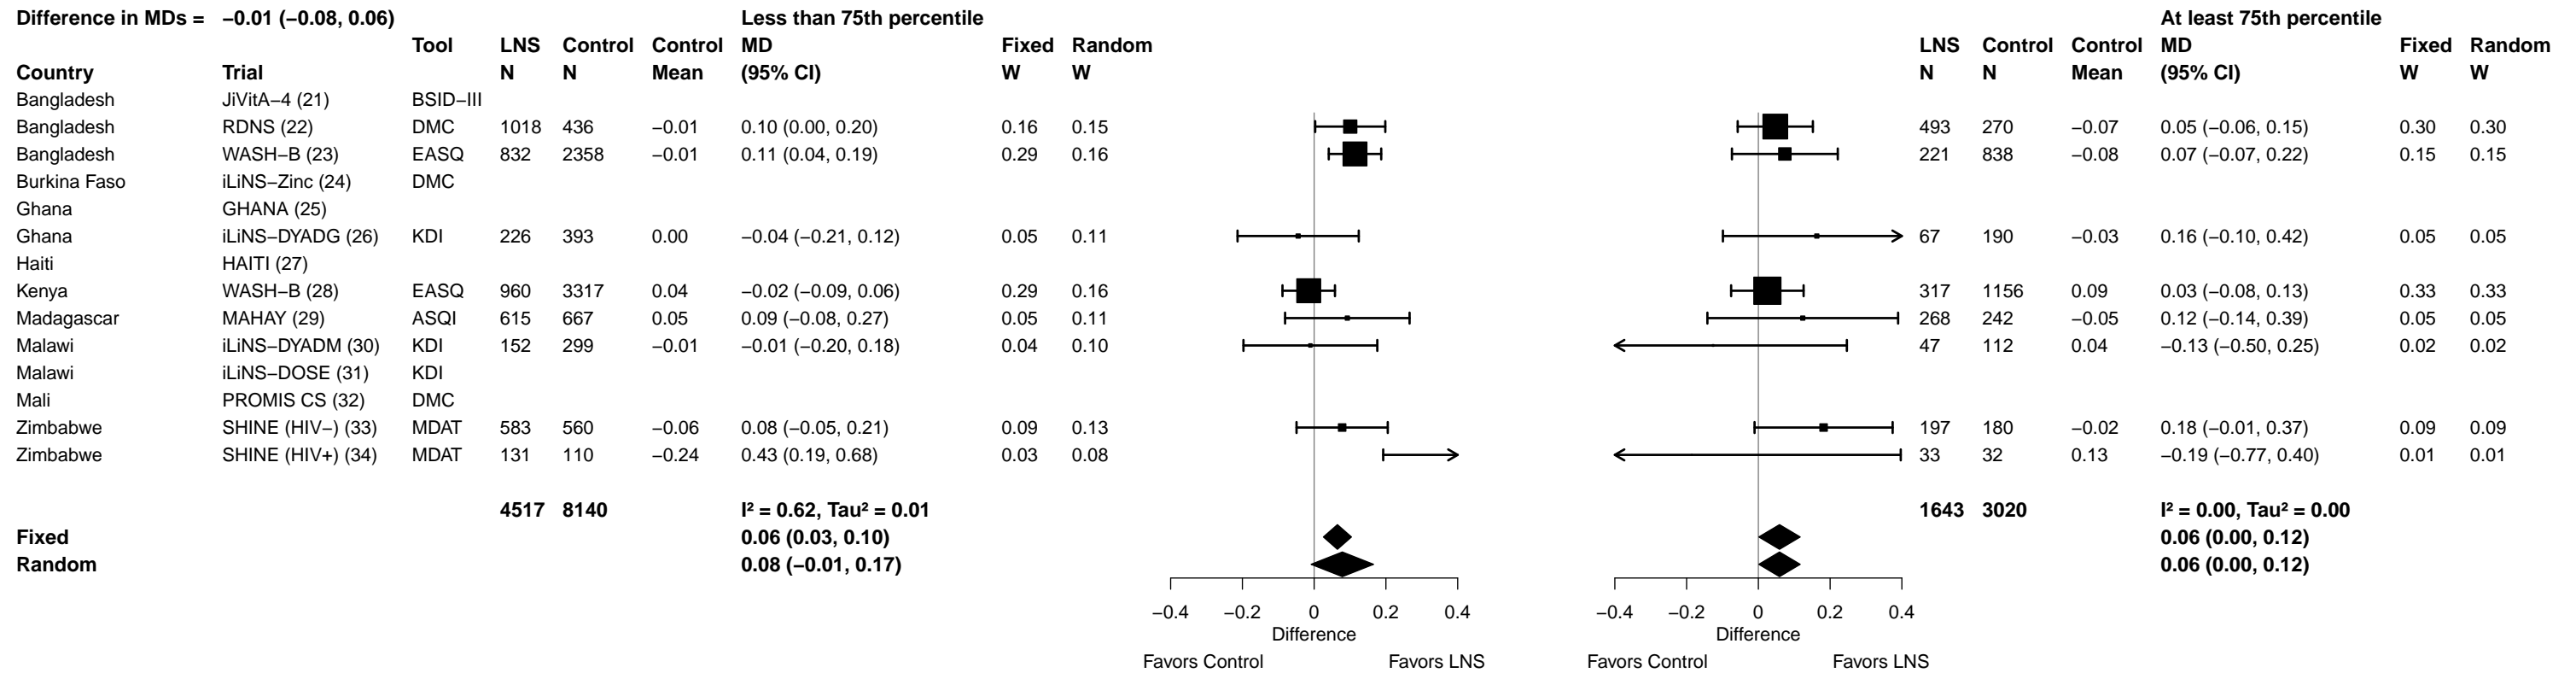



Supplemental figure 5J: Mean difference in gross motor z-score

5J6: Stratified by Child sex

P-for-interaction = 0.155  
 Difference in MDs = -0.04 (-0.09, 0.01)

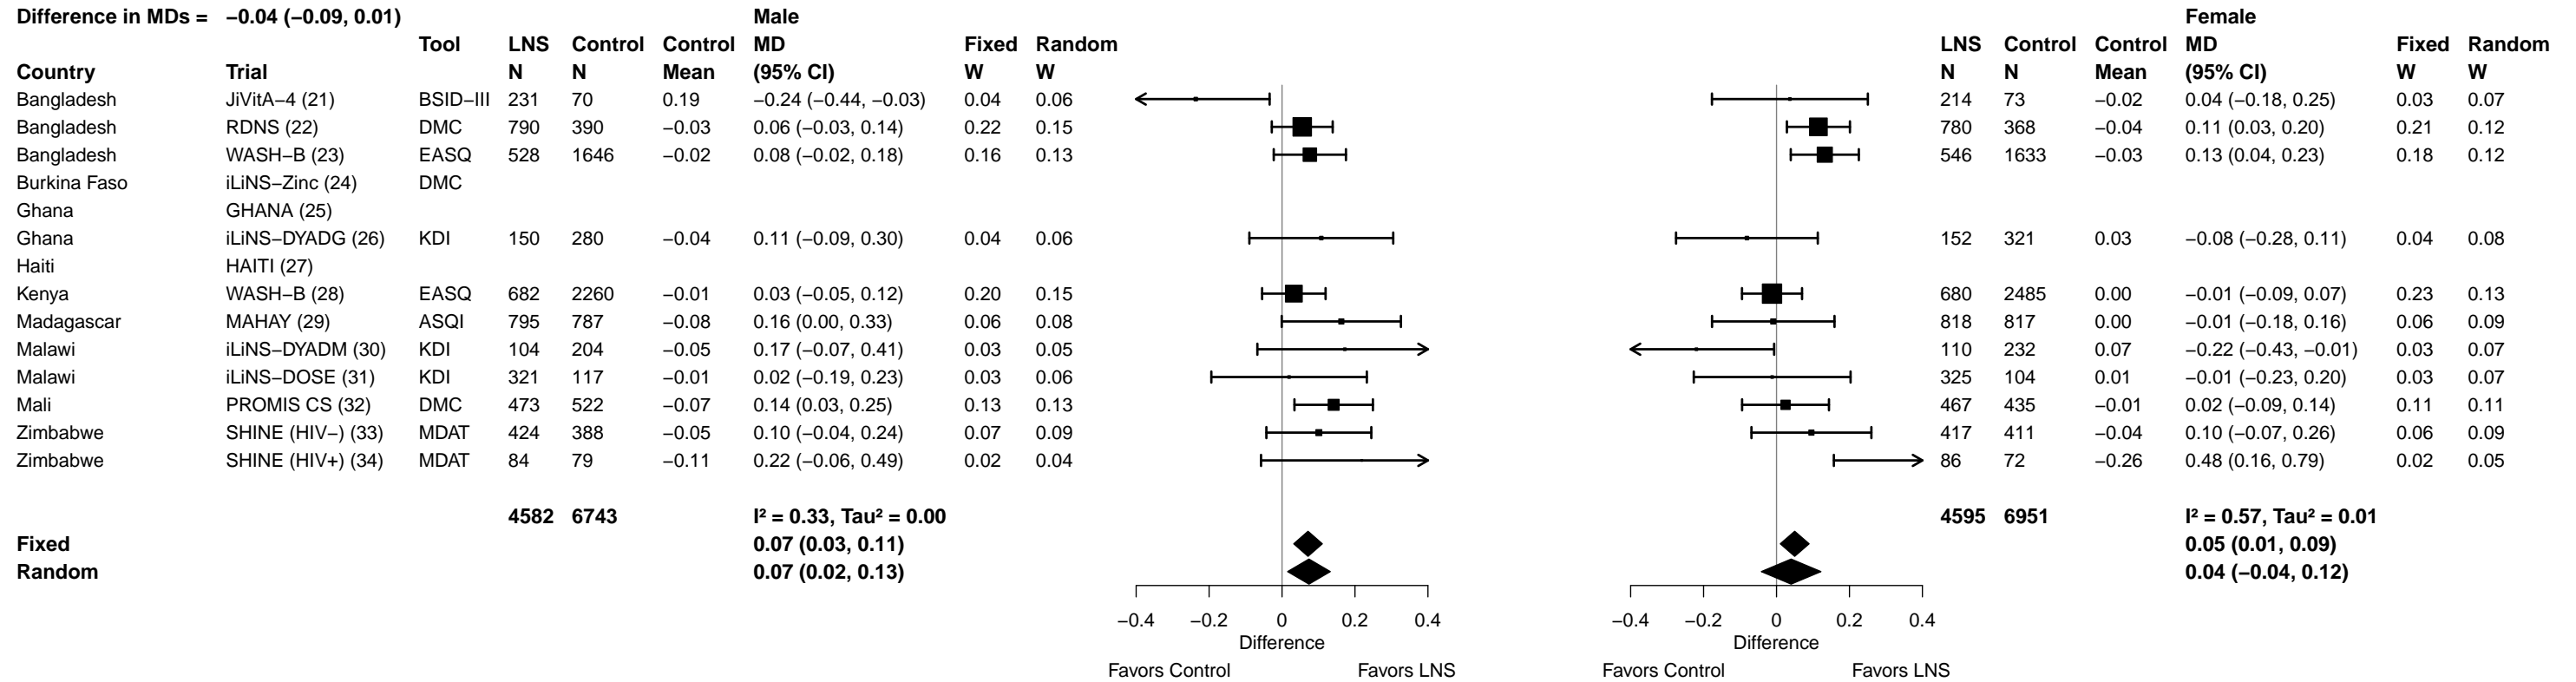

Supplemental figure 5J: Mean difference in gross motor z-score

5J7: Stratified by Child birth order

P-for-interaction = 0.145

Difference in MDs = -0.05 (-0.12, 0.02)

| Country      | Trial             | Tool     | LNS<br>N    | Control<br>N | Control<br>Mean                                     | Later born          |  | Fixed<br>W | Random<br>W |  |
|--------------|-------------------|----------|-------------|--------------|-----------------------------------------------------|---------------------|--|------------|-------------|--|
|              |                   |          |             |              |                                                     | MD<br>(95% CI)      |  |            |             |  |
| Bangladesh   | JiVitA-4 (21)     | BSID-III | 111         | 31           | -0.15                                               | 0.03 (-0.36, 0.41)  |  | 0.01       | 0.01        |  |
| Bangladesh   | RDNS (22)         | DMC      | 916         | 471          | -0.09                                               | 0.13 (0.03, 0.23)   |  | 0.13       | 0.14        |  |
| Bangladesh   | WASH-B (23)       | EASQ     | 675         | 2149         | -0.03                                               | 0.11 (0.02, 0.19)   |  | 0.18       | 0.17        |  |
| Burkina Faso | iLiNS-Zinc (24)   | DMC      |             |              |                                                     |                     |  |            |             |  |
| Ghana        | GHANA (25)        |          |             |              |                                                     |                     |  |            |             |  |
| Ghana        | iLiNS-DYADG (26)  | KDI      | 203         | 406          | -0.05                                               | 0.09 (-0.09, 0.27)  |  | 0.04       | 0.05        |  |
| Haiti        | HAITI (27)        |          |             |              |                                                     |                     |  |            |             |  |
| Kenya        | WASH-B (28)       | EASQ     | 1071        | 3767         | -0.02                                               | 0.01 (-0.06, 0.08)  |  | 0.26       | 0.22        |  |
| Madagascar   | MAHAY (29)        | ASQI     | 1162        | 1118         | -0.08                                               | 0.07 (-0.08, 0.22)  |  | 0.05       | 0.06        |  |
| Malawi       | iLiNS-DYADM (30)  | KDI      | 169         | 349          | 0.01                                                | -0.04 (-0.23, 0.14) |  | 0.04       | 0.04        |  |
| Malawi       | iLiNS-DOSE (31)   | KDI      | 425         | 151          | -0.06                                               | 0.07 (-0.12, 0.25)  |  | 0.04       | 0.04        |  |
| Mali         | PROMIS CS (32)    | DMC      | 780         | 819          | -0.04                                               | 0.12 (0.03, 0.21)   |  | 0.16       | 0.16        |  |
| Zimbabwe     | SHINE (HIV-) (33) | MDAT     | 602         | 574          | 0.00                                                | 0.10 (-0.03, 0.24)  |  | 0.07       | 0.08        |  |
| Zimbabwe     | SHINE (HIV+) (34) | MDAT     | 149         | 118          | -0.14                                               | 0.29 (0.08, 0.50)   |  | 0.03       | 0.03        |  |
|              |                   |          | <b>6263</b> | <b>9953</b>  |                                                     |                     |  |            |             |  |
|              |                   |          |             |              | <b>I<sup>2</sup> = 0.18, Tau<sup>2</sup> = 0.00</b> |                     |  |            |             |  |
|              |                   |          |             |              | <b>0.08 (0.05, 0.12)</b>                            |                     |  |            |             |  |
|              |                   |          |             |              | <b>0.08 (0.04, 0.12)</b>                            |                     |  |            |             |  |

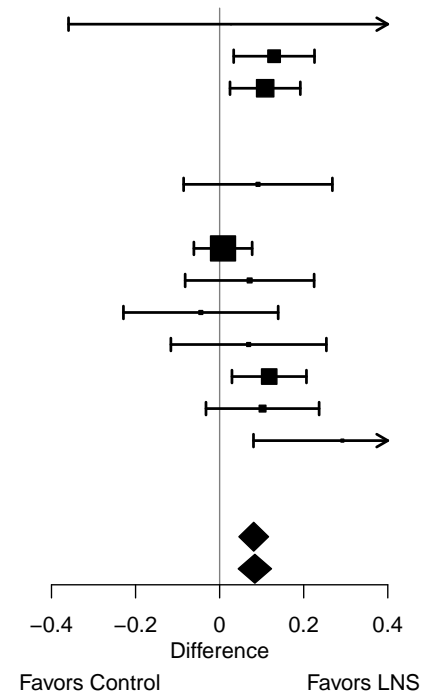

| Country      | Trial             | Tool     | LNS<br>N    | Control<br>N | Control<br>Mean                                     | Firstborn           |  | Fixed<br>W | Random<br>W |  |
|--------------|-------------------|----------|-------------|--------------|-----------------------------------------------------|---------------------|--|------------|-------------|--|
|              |                   |          |             |              |                                                     | MD<br>(95% CI)      |  |            |             |  |
| Bangladesh   | JiVitA-4 (21)     | BSID-III | 333         | 111          | 0.14                                                | -0.12 (-0.28, 0.04) |  | 0.11       | 0.12        |  |
| Bangladesh   | RDNS (22)         | DMC      | 653         | 287          | 0.05                                                | 0.01 (-0.10, 0.12)  |  | 0.24       | 0.16        |  |
| Bangladesh   | WASH-B (23)       | EASQ     | 379         | 1028         | 0.02                                                | 0.07 (-0.04, 0.18)  |  | 0.22       | 0.15        |  |
| Burkina Faso | iLiNS-Zinc (24)   | DMC      |             |              |                                                     |                     |  |            |             |  |
| Ghana        | GHANA (25)        |          |             |              |                                                     |                     |  |            |             |  |
| Ghana        | iLiNS-DYADG (26)  | KDI      | 99          | 195          | 0.10                                                | -0.16 (-0.37, 0.06) |  | 0.06       | 0.08        |  |
| Haiti        | HAITI (27)        |          |             |              |                                                     |                     |  |            |             |  |
| Kenya        | WASH-B (28)       | EASQ     | 289         | 974          | 0.07                                                | 0.01 (-0.14, 0.16)  |  | 0.12       | 0.12        |  |
| Madagascar   | MAHAY (29)        | ASQI     | 433         | 465          | 0.04                                                | 0.11 (-0.09, 0.30)  |  | 0.07       | 0.09        |  |
| Malawi       | iLiNS-DYADM (30)  | KDI      | 45          | 85           | 0.04                                                | 0.02 (-0.30, 0.34)  |  | 0.03       | 0.05        |  |
| Malawi       | iLiNS-DOSE (31)   | KDI      | 134         | 41           | 0.21                                                | -0.11 (-0.42, 0.21) |  | 0.03       | 0.05        |  |
| Mali         | PROMIS CS (32)    | DMC      | 145         | 126          | -0.03                                               | -0.07 (-0.32, 0.17) |  | 0.05       | 0.07        |  |
| Zimbabwe     | SHINE (HIV-) (33) | MDAT     | 203         | 191          | -0.15                                               | 0.08 (-0.13, 0.29)  |  | 0.06       | 0.09        |  |
| Zimbabwe     | SHINE (HIV+) (34) | MDAT     | 18          | 29           | -0.30                                               | 0.73 (0.15, 1.31)   |  | 0.01       | 0.02        |  |
|              |                   |          | <b>2731</b> | <b>3532</b>  |                                                     |                     |  |            |             |  |
|              |                   |          |             |              | <b>I<sup>2</sup> = 0.30, Tau<sup>2</sup> = 0.01</b> |                     |  |            |             |  |
|              |                   |          |             |              | <b>0.01 (-0.04, 0.06)</b>                           |                     |  |            |             |  |
|              |                   |          |             |              | <b>0.01 (-0.07, 0.09)</b>                           |                     |  |            |             |  |

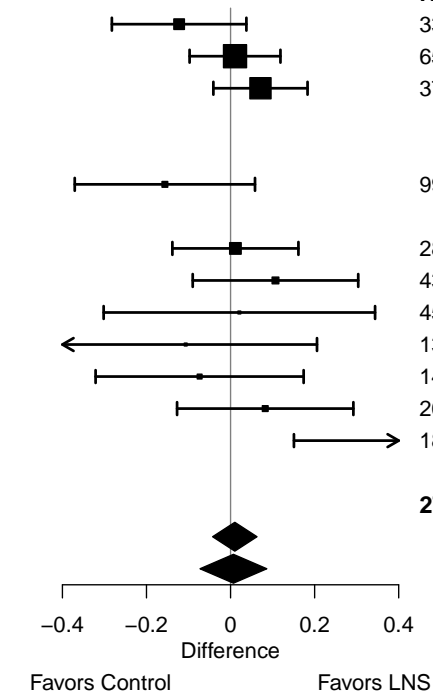

Supplemental figure 5J: Mean difference in gross motor z-score

5J8: Stratified by Child baseline stunting

**P-for-interaction = 0.312**  
**Difference in MDs = 0.06 (-0.05, 0.17)**

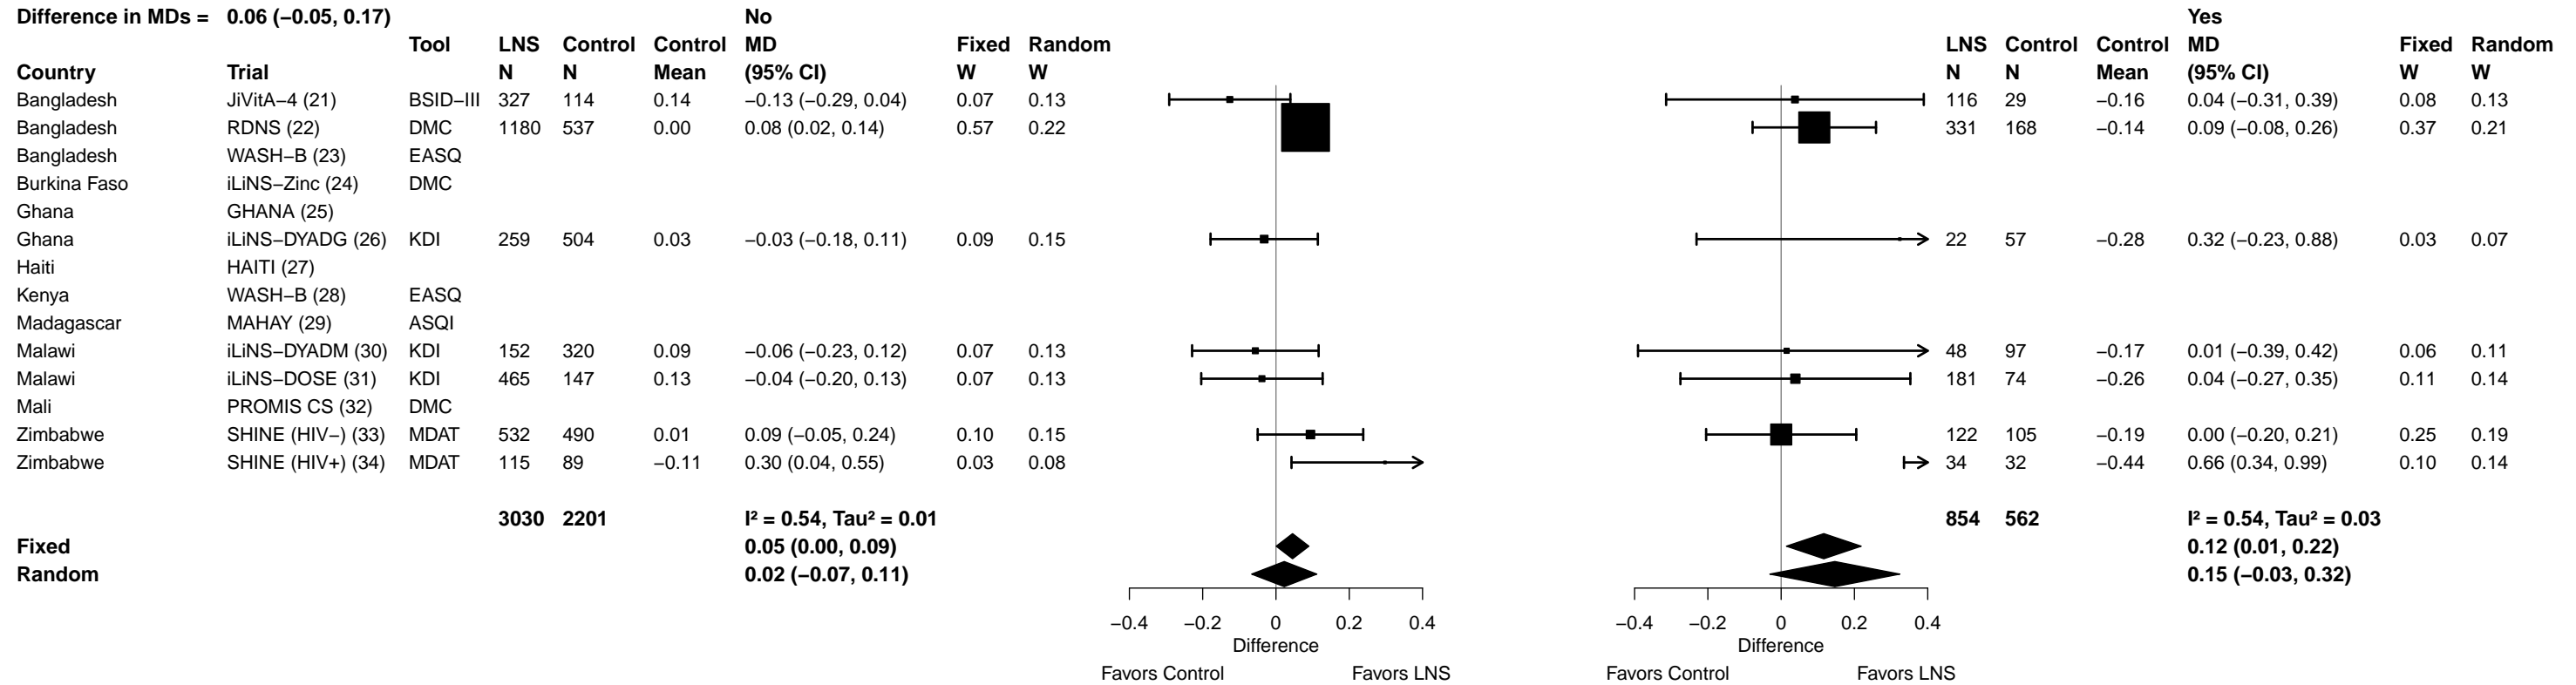

Supplemental figure 5J: Mean difference in gross motor z-score

5J9: Stratified by Child baseline acute malnutrition

**P-for-interaction = 0.417**  
**Difference in MDs = 0.08 (-0.11, 0.26)**

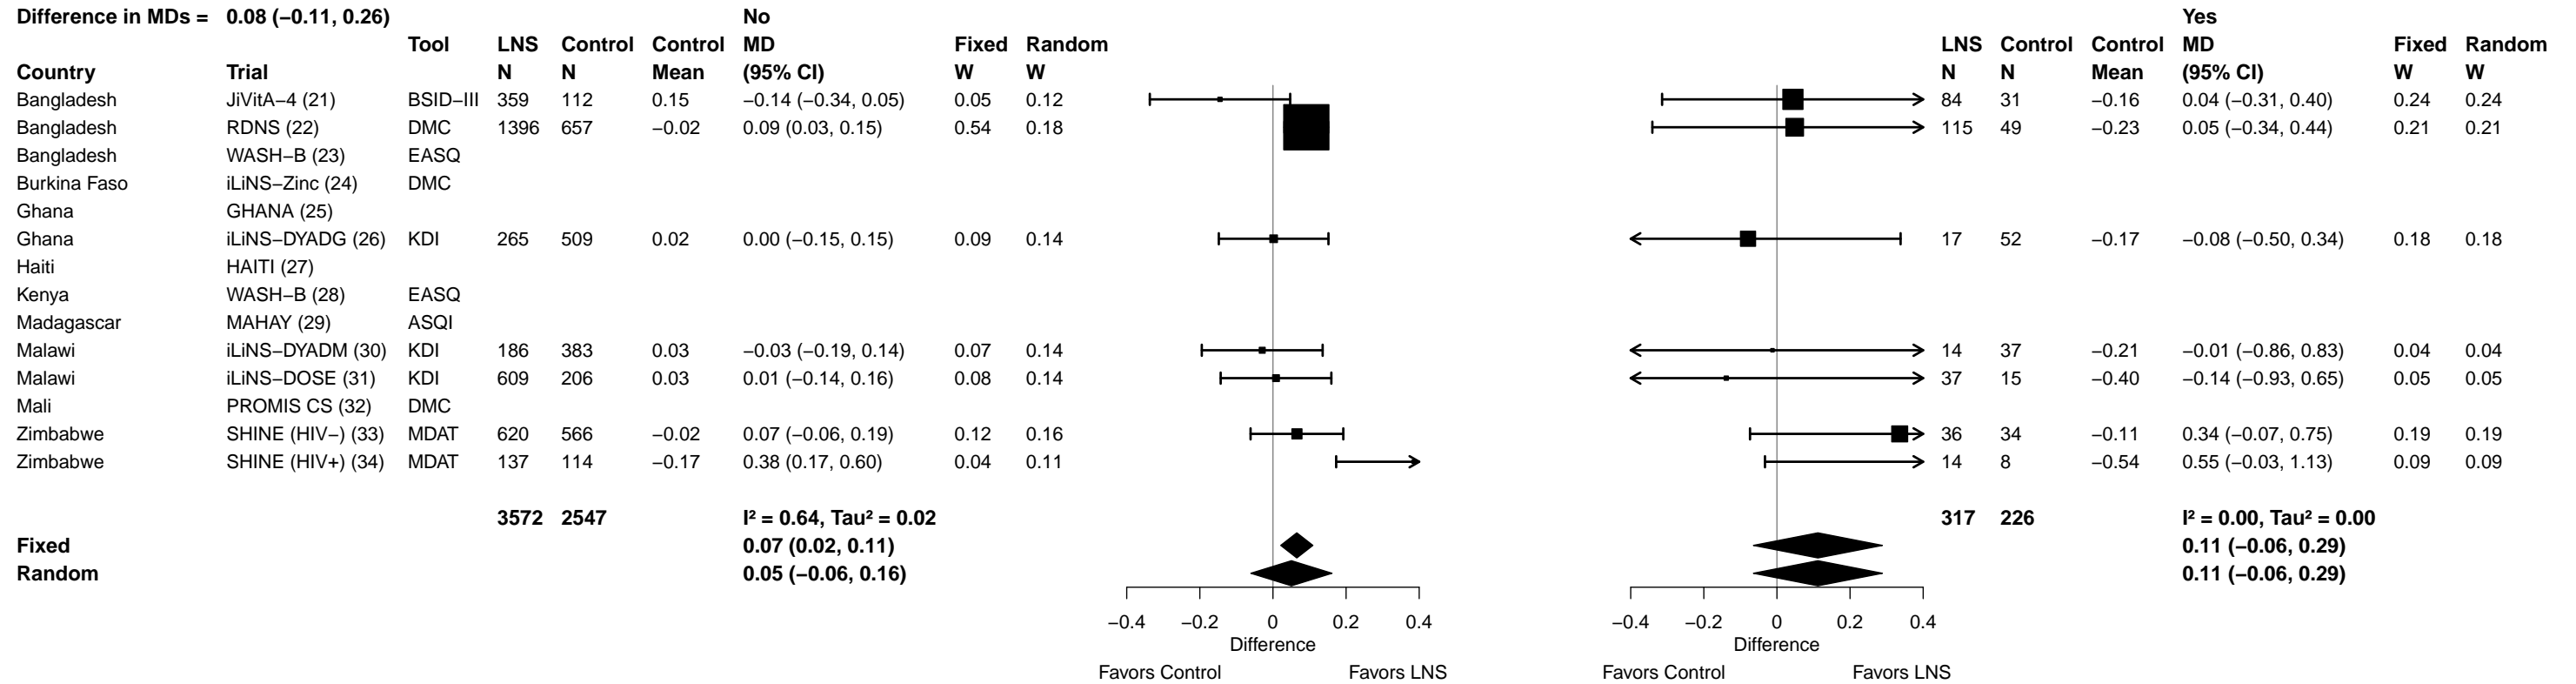

Supplemental figure 5J: Mean difference in gross motor z-score

5J10: Stratified by Child baseline anemia

**P-for-interaction = 0.658**  
**Difference in MDs = 0.03 (-0.12, 0.19)**

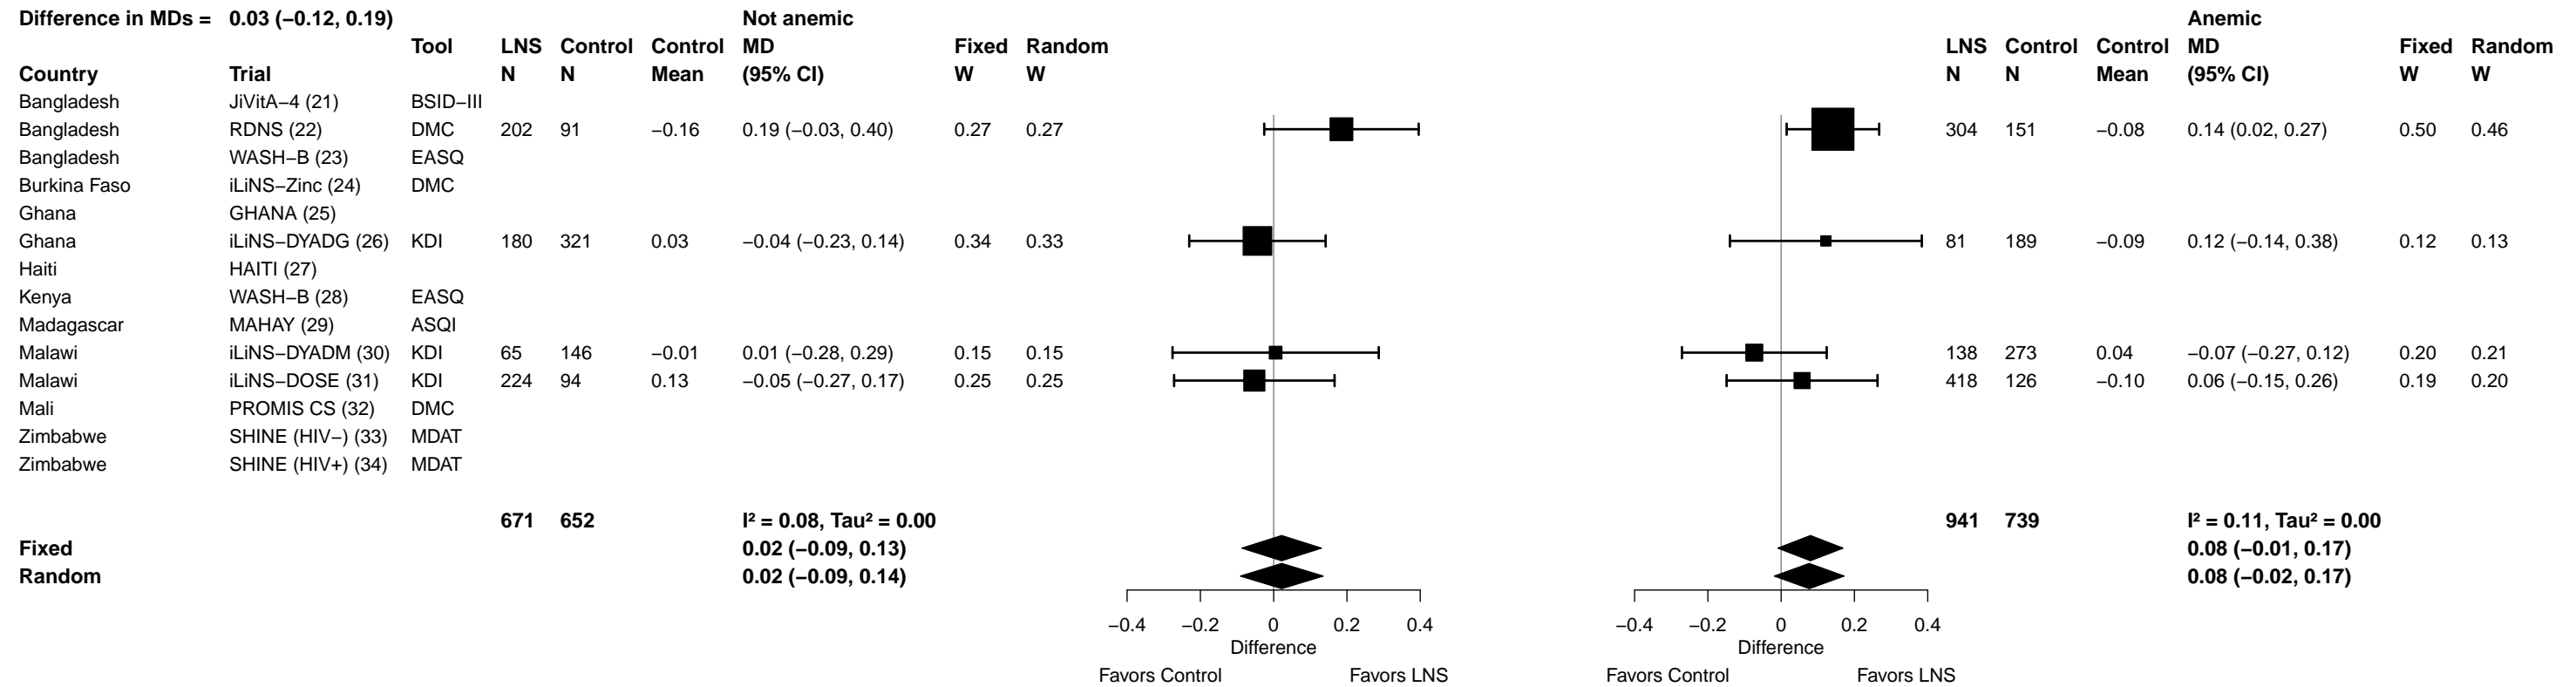

### Supplemental figure 5K: Mean difference in fine motor z-score

#### 5K1: Stratified by Maternal height

P-for-interaction = 0.069

Difference in MDs = -0.10 (-0.20, 0.01)

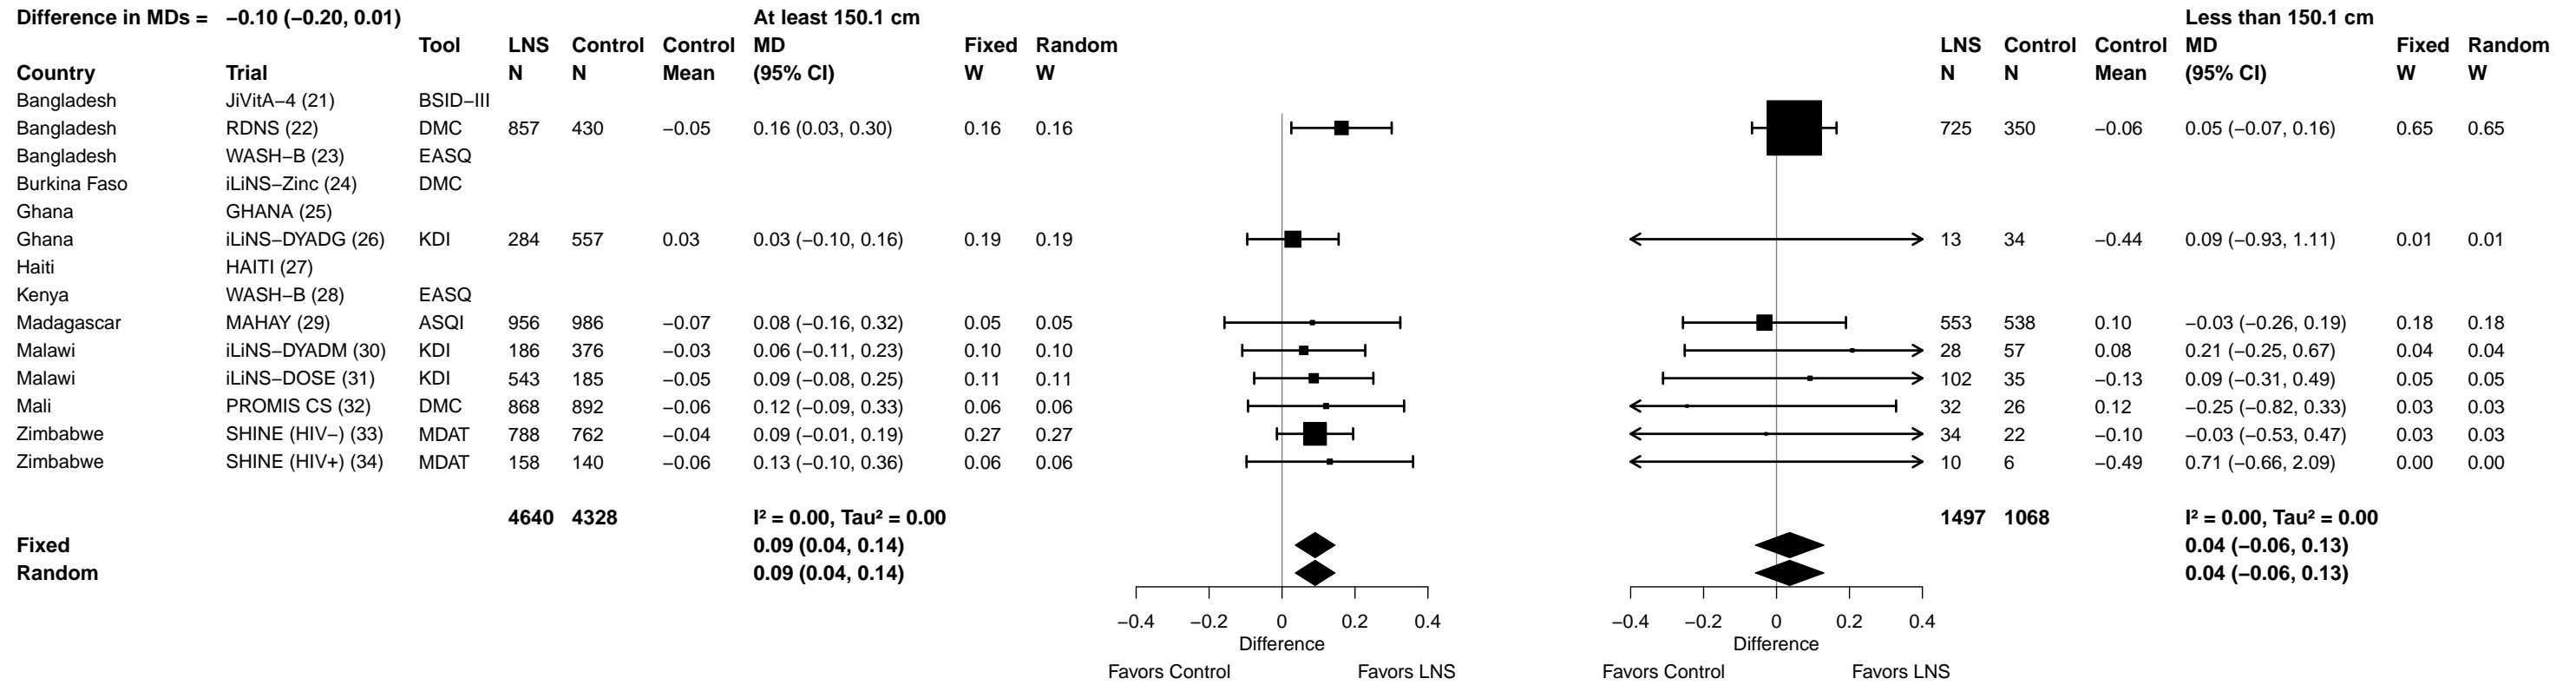

Supplemental figure 5K: Mean difference in fine motor z-score

5K2: Stratified by Maternal BMI

P-for-interaction = 0.767

Difference in MDs = -0.02 (-0.12, 0.09)

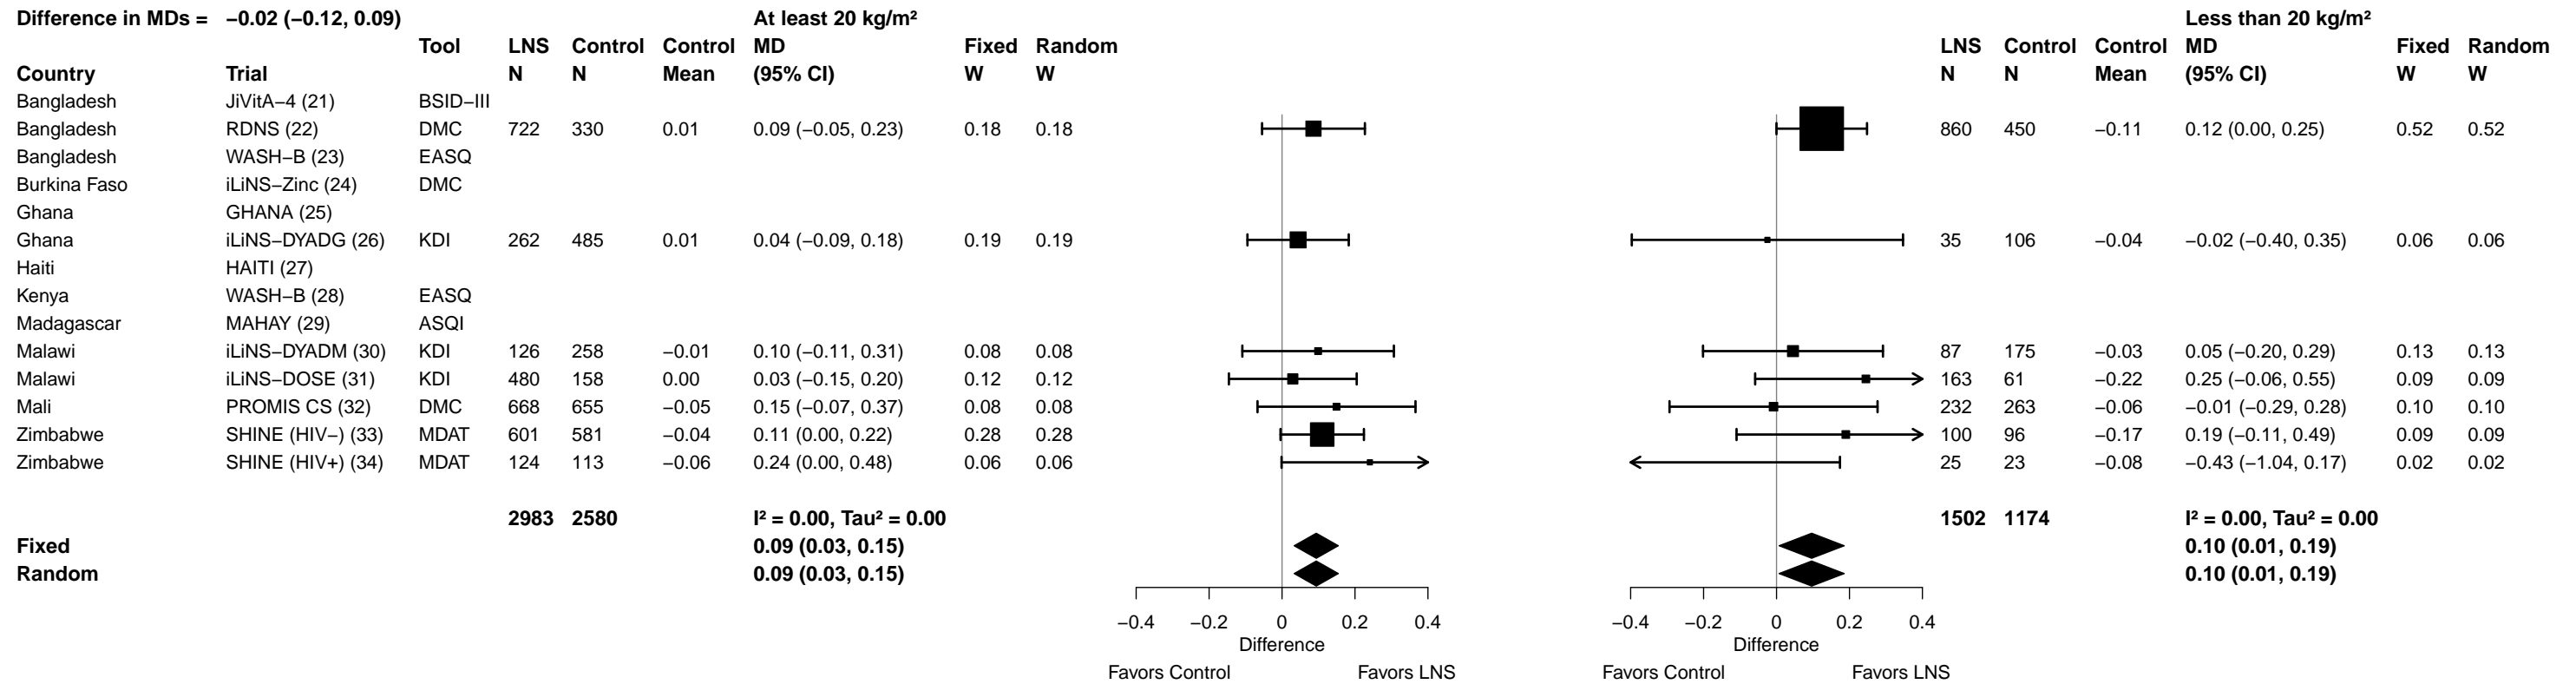

Supplemental figure 5K: Mean difference in fine motor z-score

5K3: Stratified by Maternal age

P-for-interaction = 0.005

Difference in MDs = -0.10 (-0.17, -0.03)

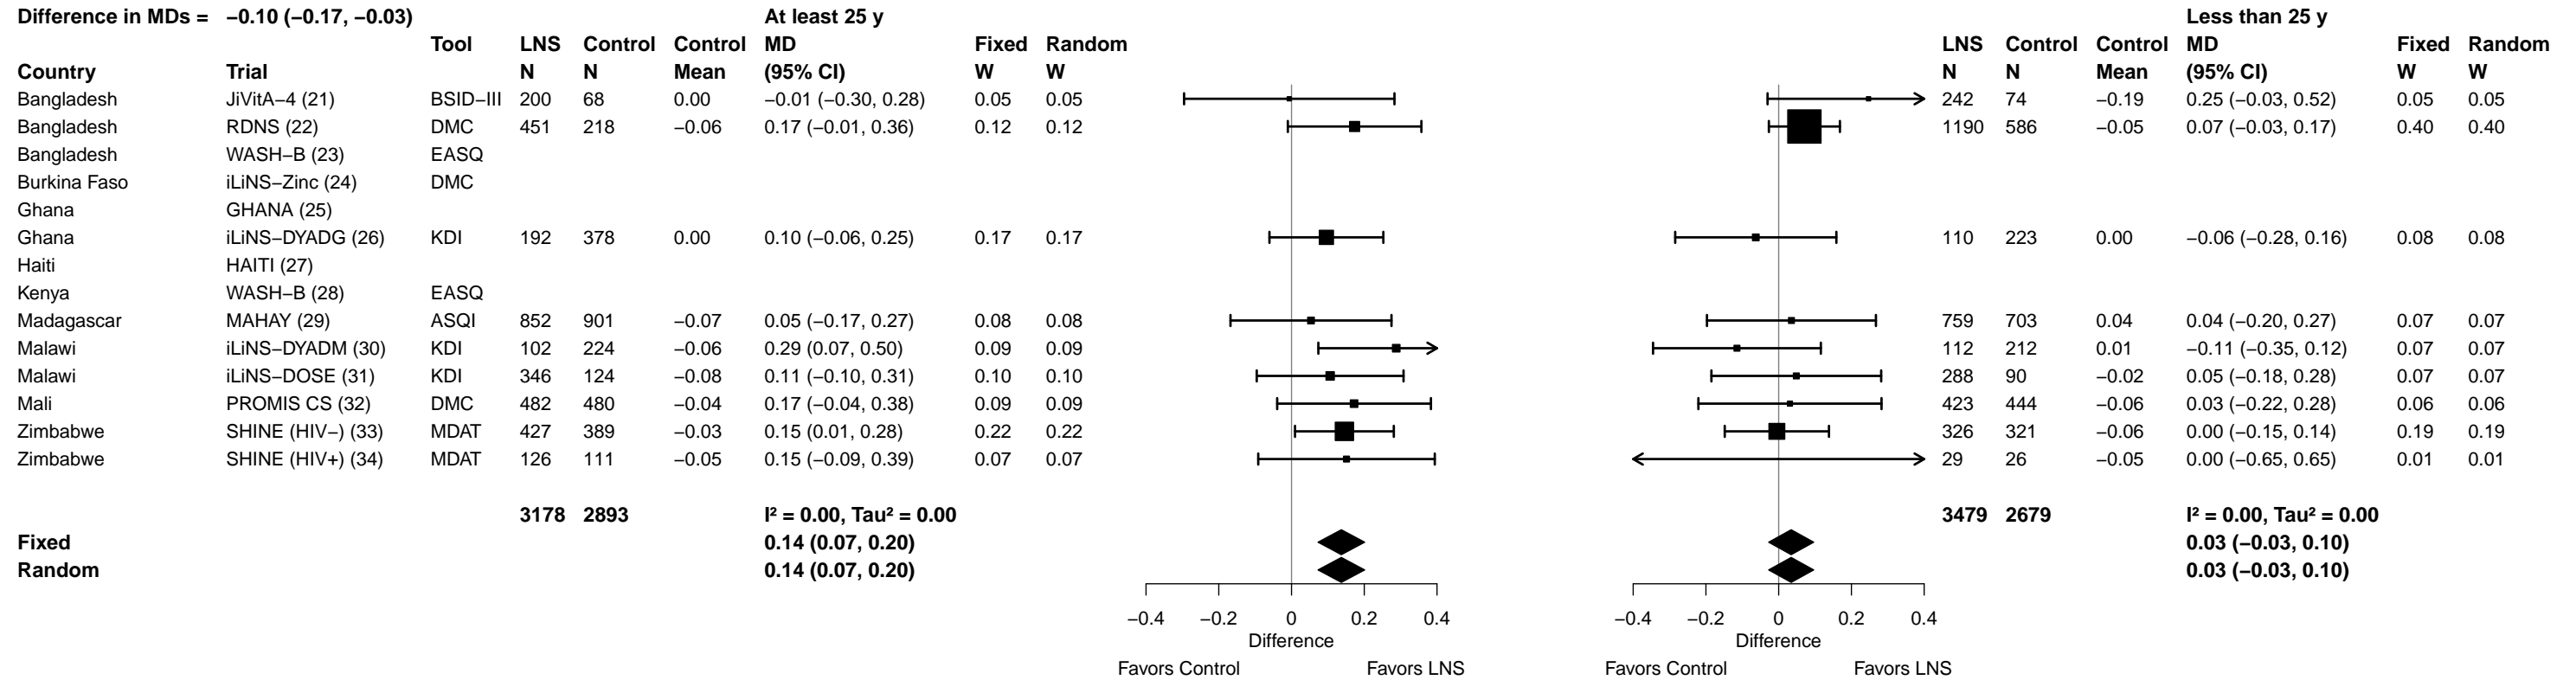



Supplemental figure 5K: Mean difference in fine motor z-score

5K4: Stratified by Maternal education

**P-for-interaction = 0.003**  
**Difference in MDs = 0.15 (0.05, 0.25)**

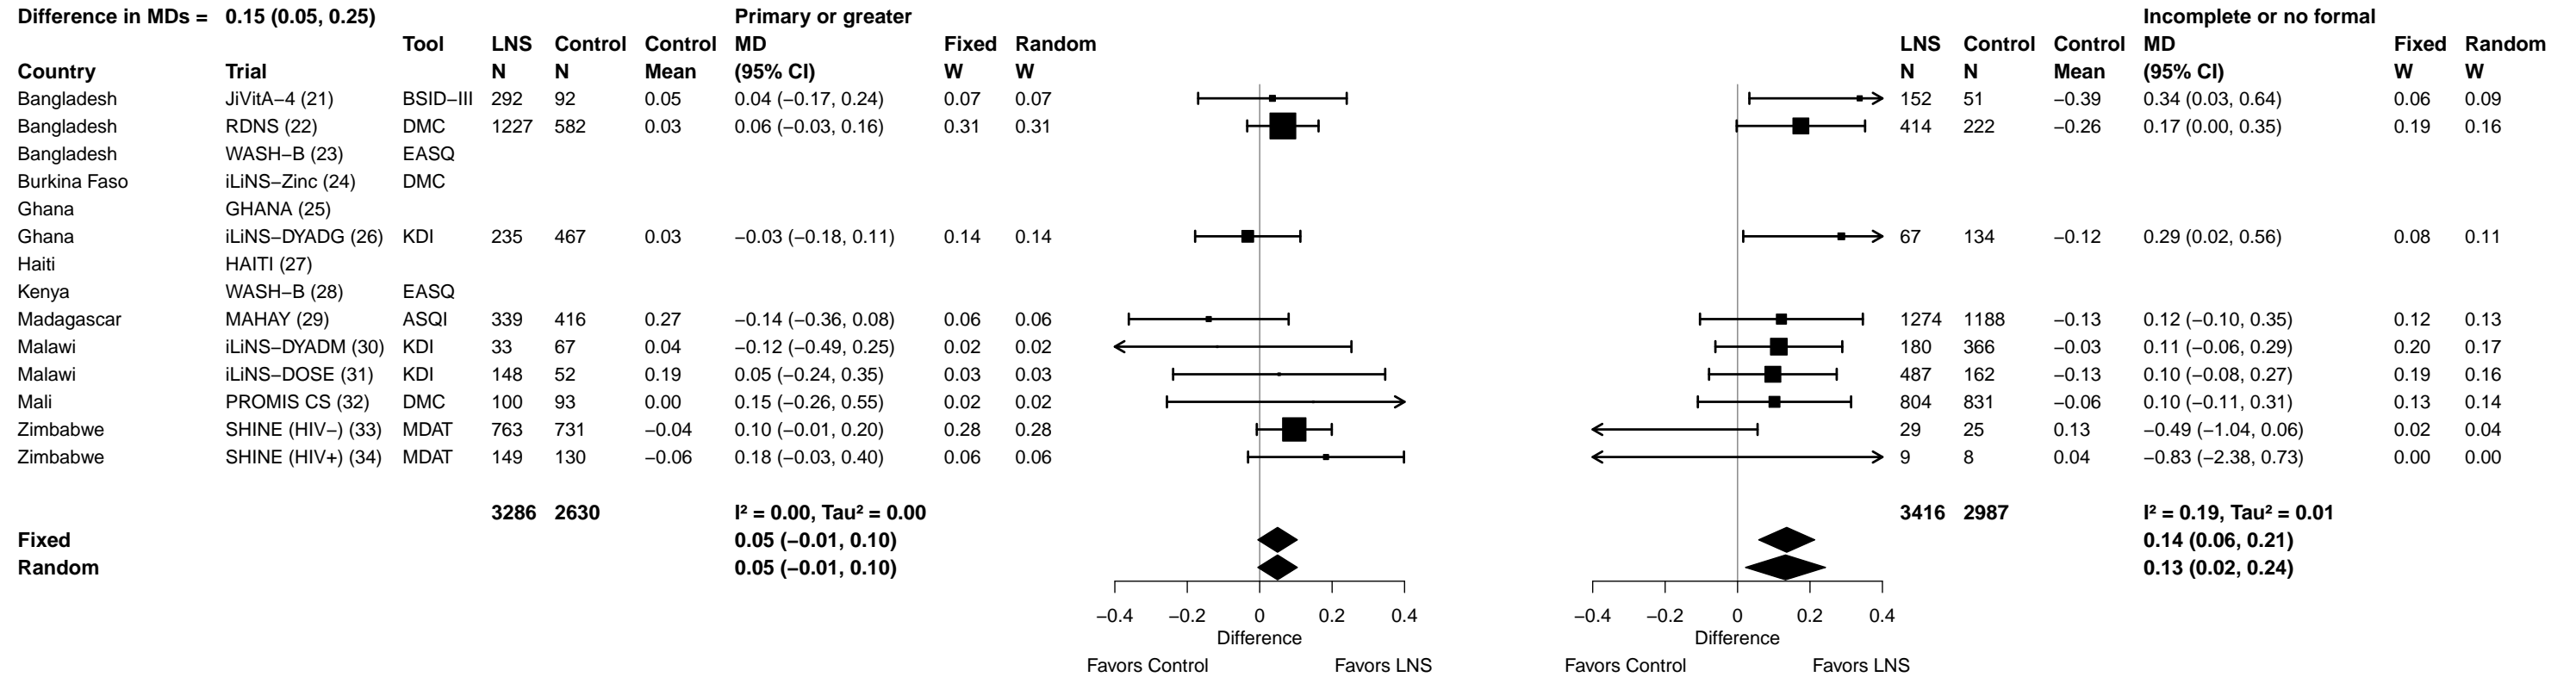

Supplemental figure 5K: Mean difference in fine motor z-score

5K5: Stratified by Maternal depressive symptoms

P-for-interaction = 0.647

Difference in MDs = -0.02 (-0.11, 0.07)

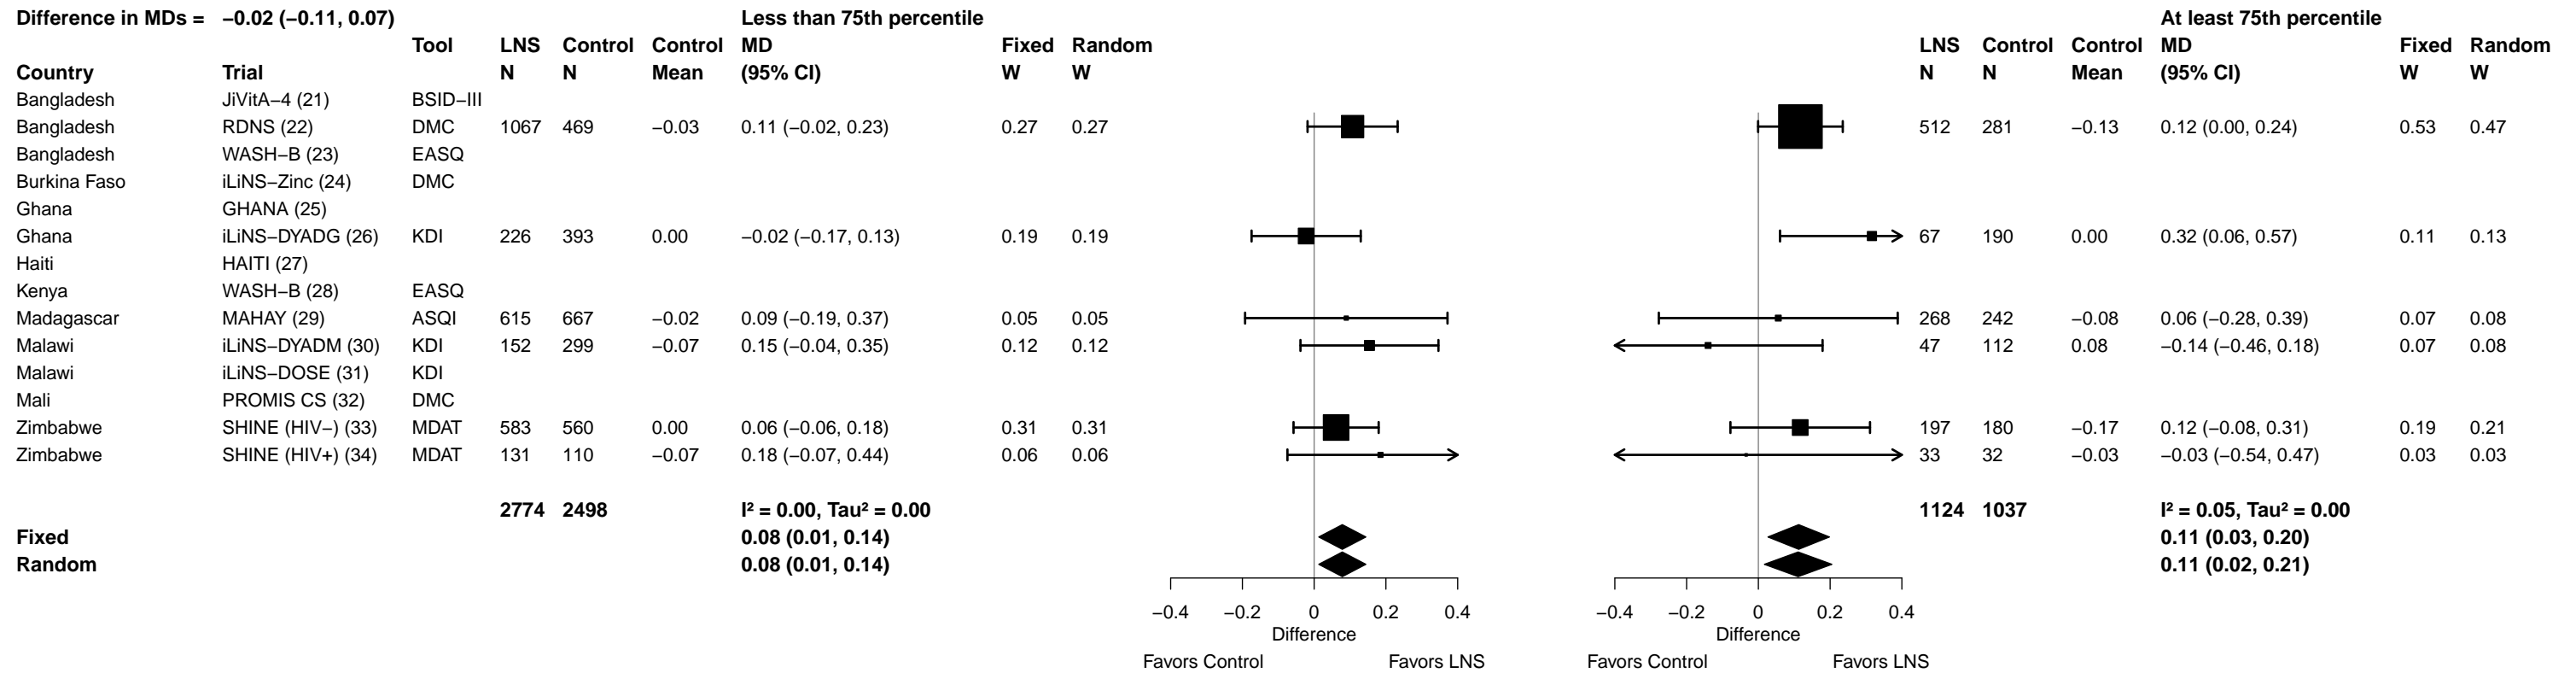

Supplemental figure 5K: Mean difference in fine motor z-score

5K6: Stratified by Child sex

P-for-interaction = 0.162  
 Difference in MDs = 0.05 (-0.02, 0.11)

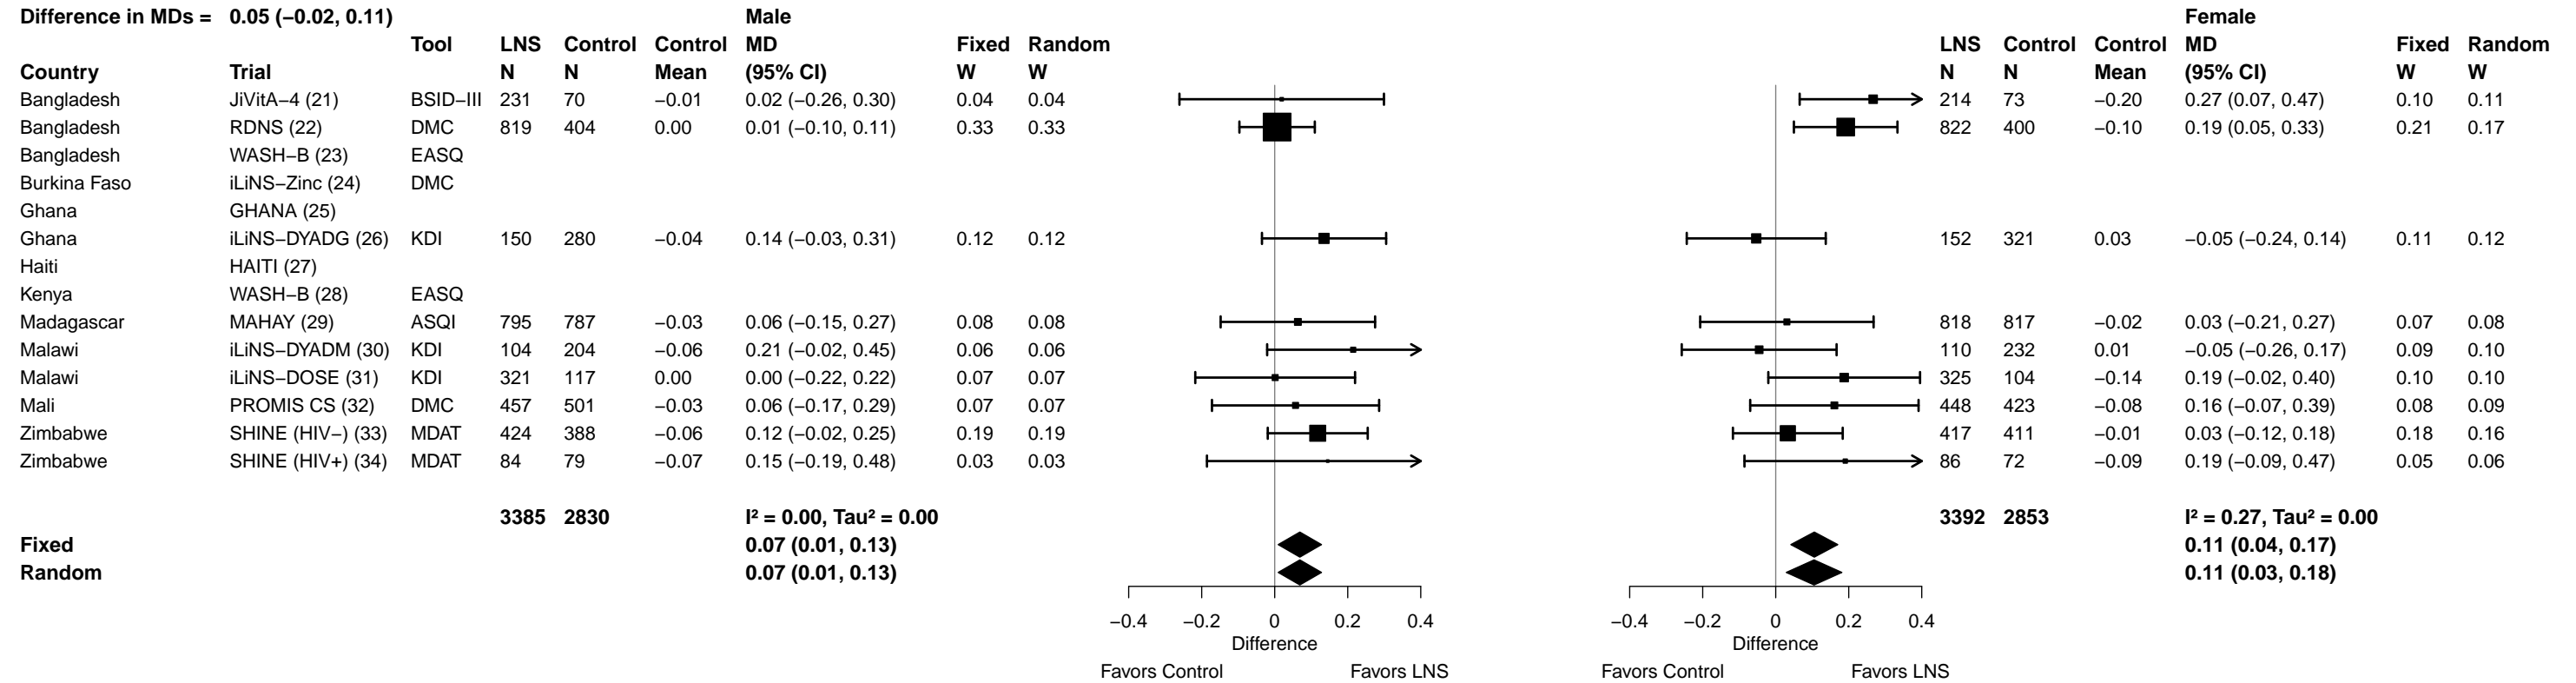

Supplemental figure 5K: Mean difference in fine motor z-score

5K7: Stratified by Child birth order

P-for-interaction = 0.062

Difference in MDs = -0.08 (-0.17, 0.00)

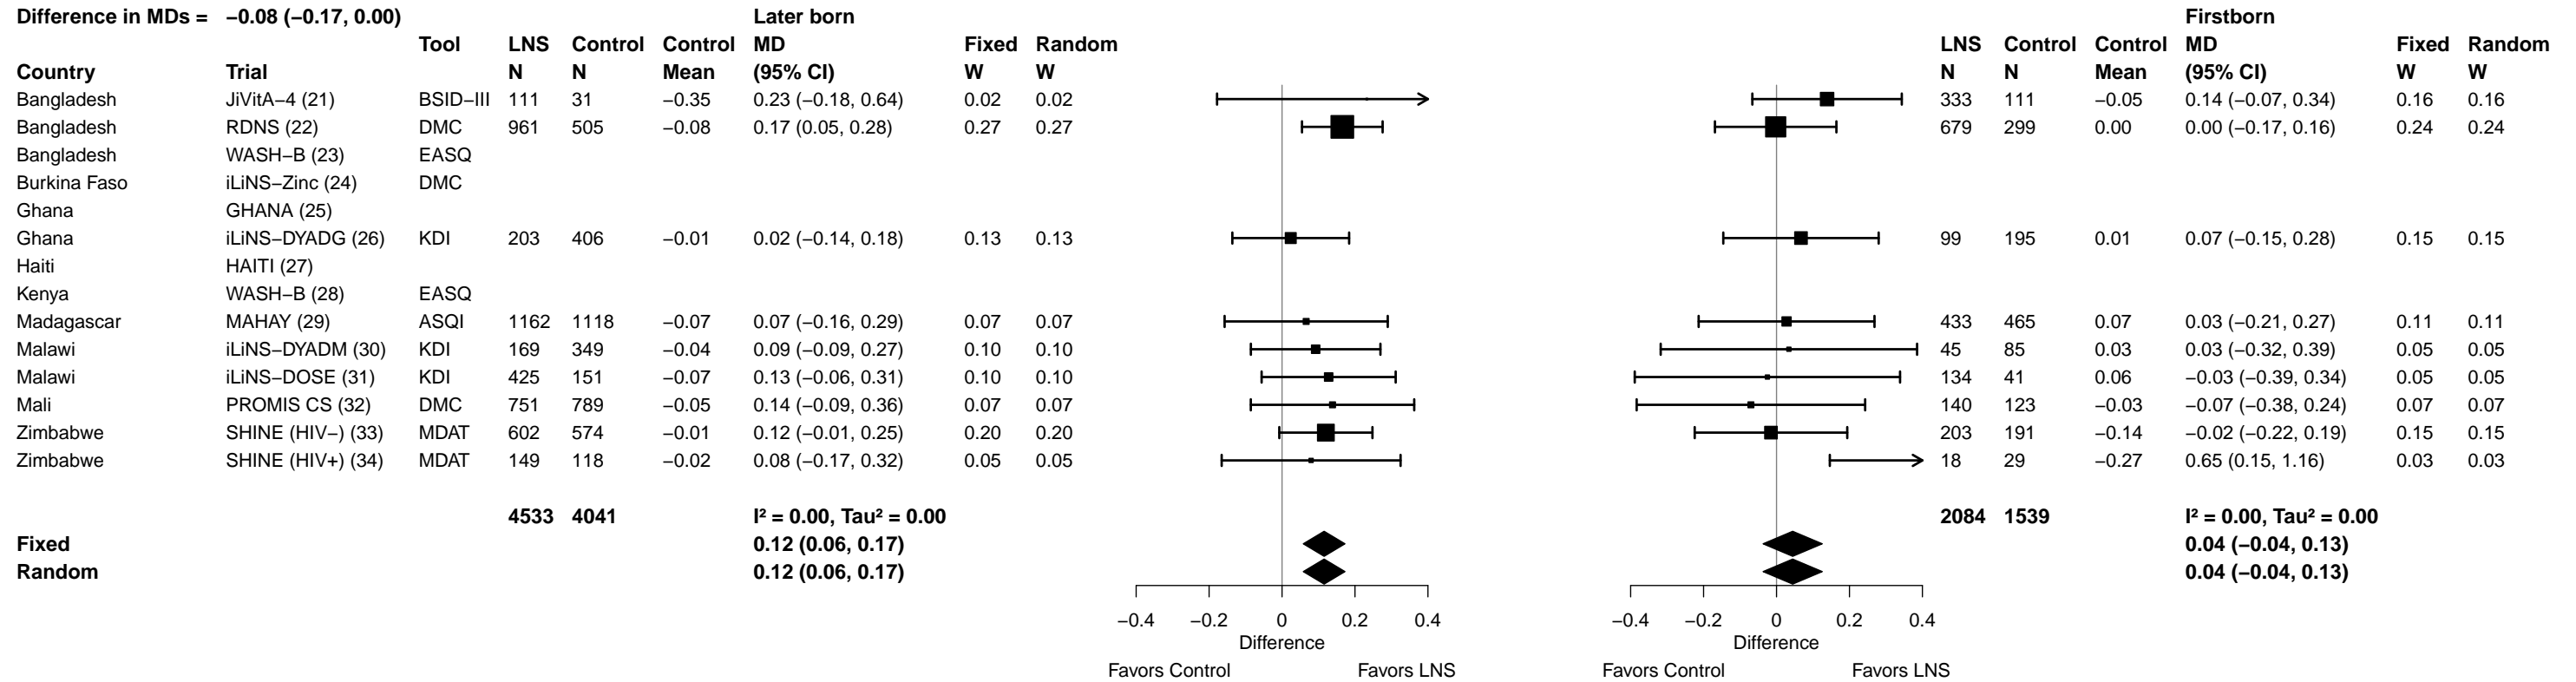

Supplemental figure 5K: Mean difference in fine motor z-score

5K8: Stratified by Child baseline stunting

**P-for-interaction = 0.613**  
**Difference in MDs = 0.03 (-0.09, 0.15)**

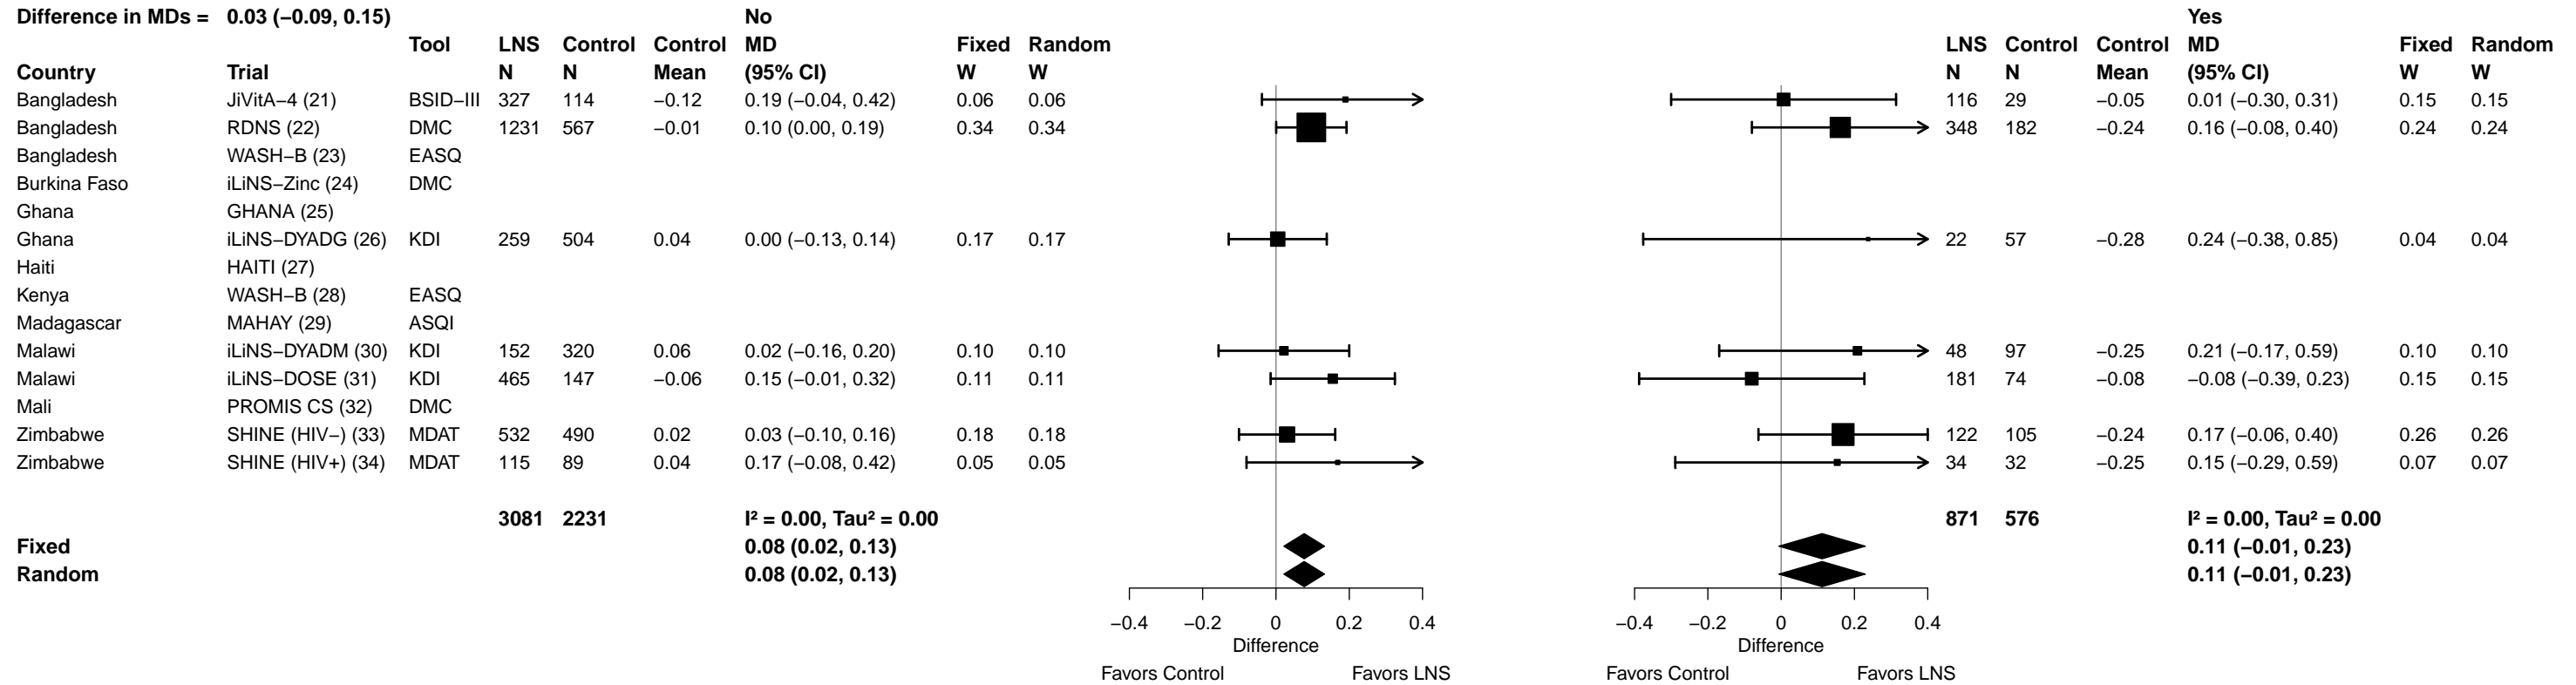

Supplemental figure 5K: Mean difference in fine motor z-score

5K9: Stratified by Child baseline acute malnutrition

P-for-interaction = 0.992  
 Difference in MDs = 0.00 (-0.18, 0.18)

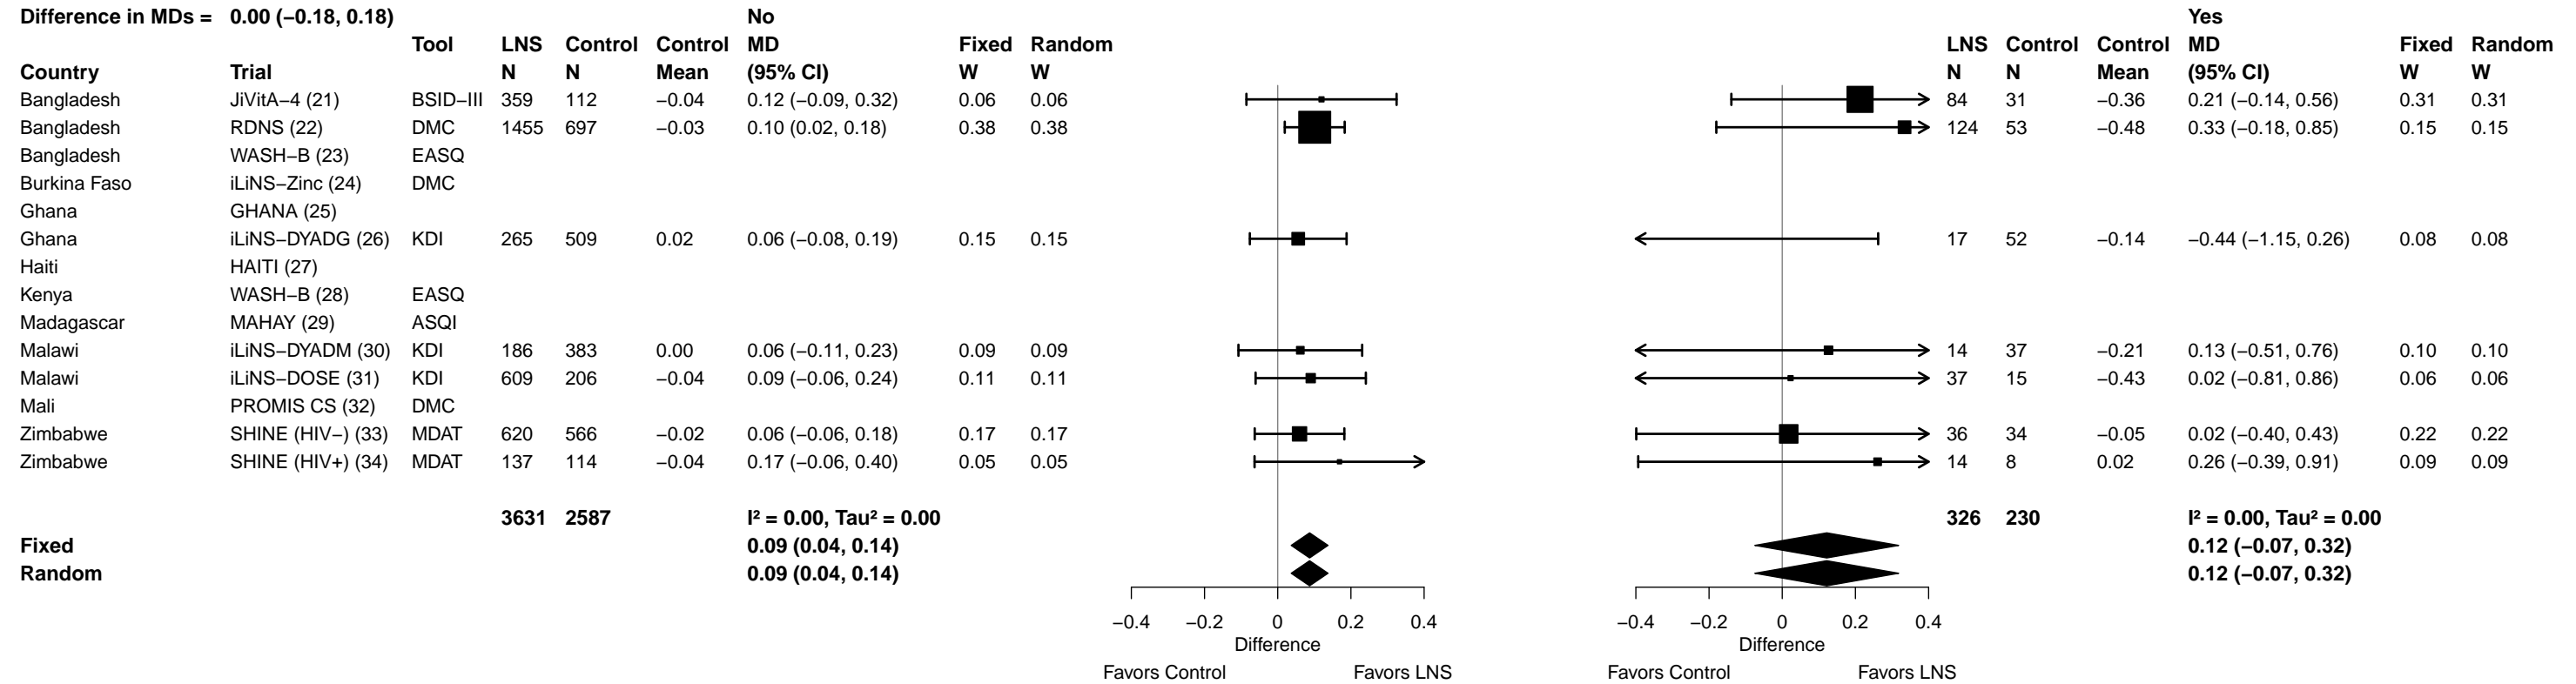

Supplemental figure 5K: Mean difference in fine motor z-score

5K10: Stratified by Child baseline anemia

**P-for-interaction = 0.084**  
**Difference in MDs = 0.14 (-0.02, 0.29)**

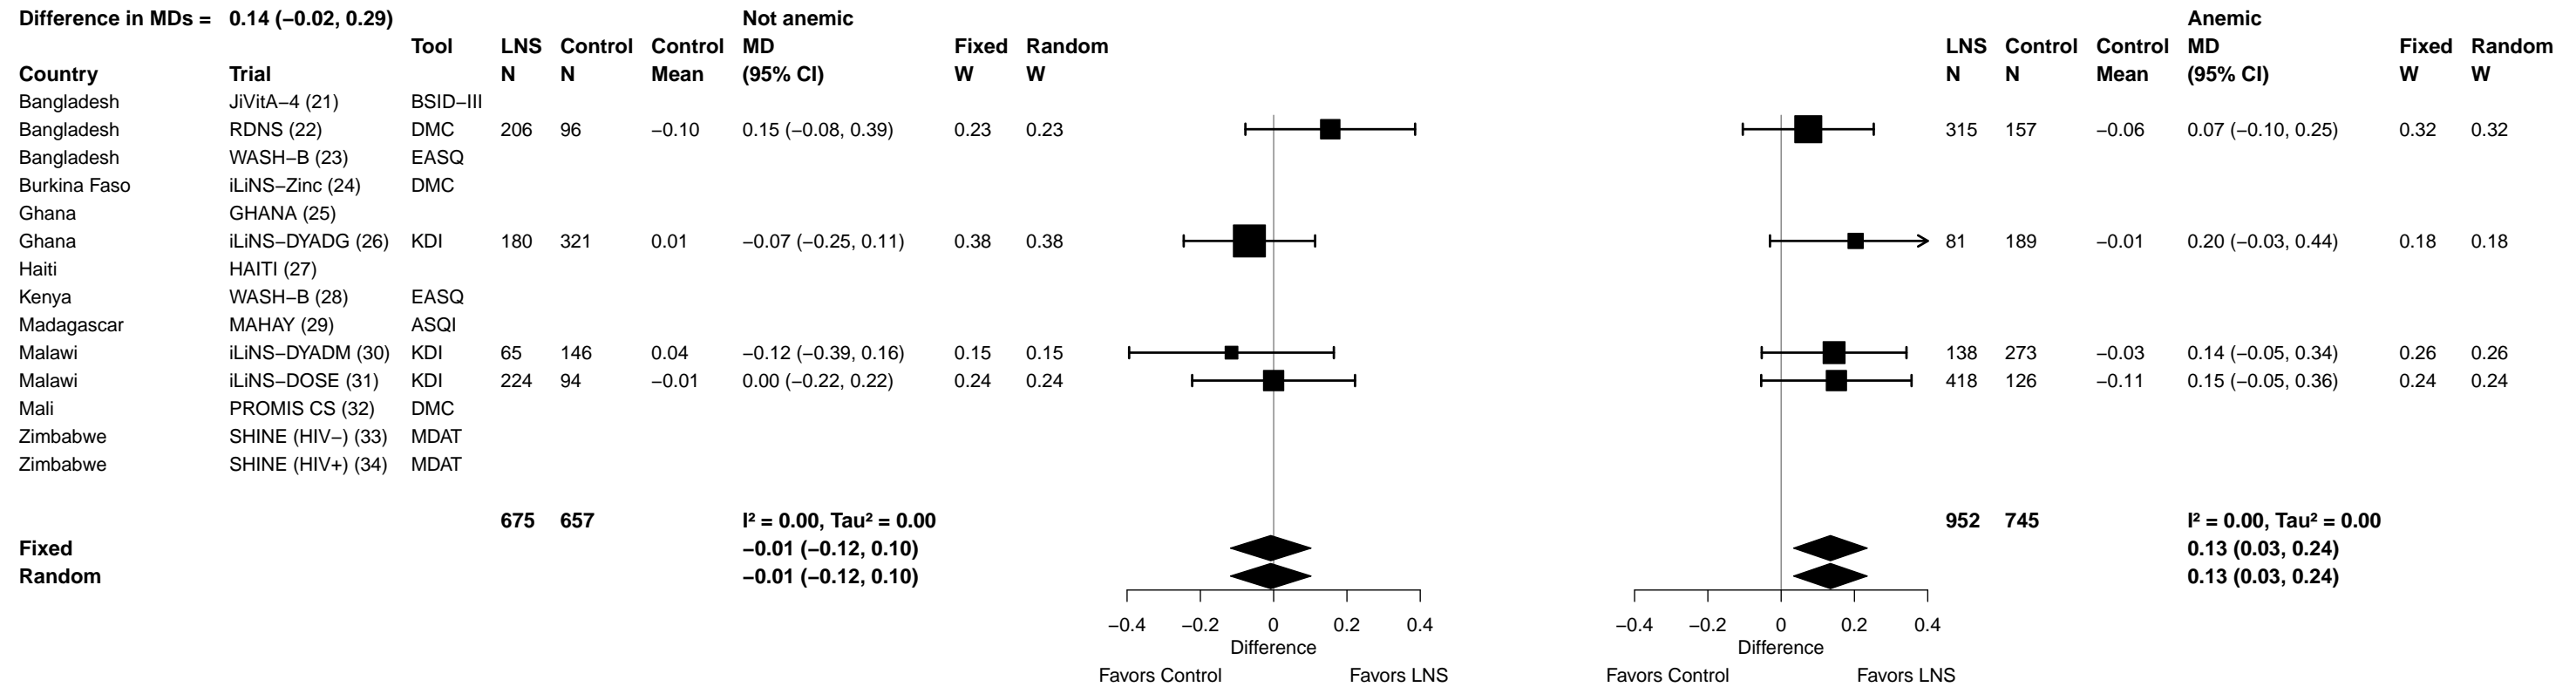

### Supplemental figure 5L: Mean difference in executive function z-score

#### 5L1: Stratified by Maternal height

**P-for-interaction = 0.522**  
**Difference in MDs = -0.04 (-0.15, 0.08)**

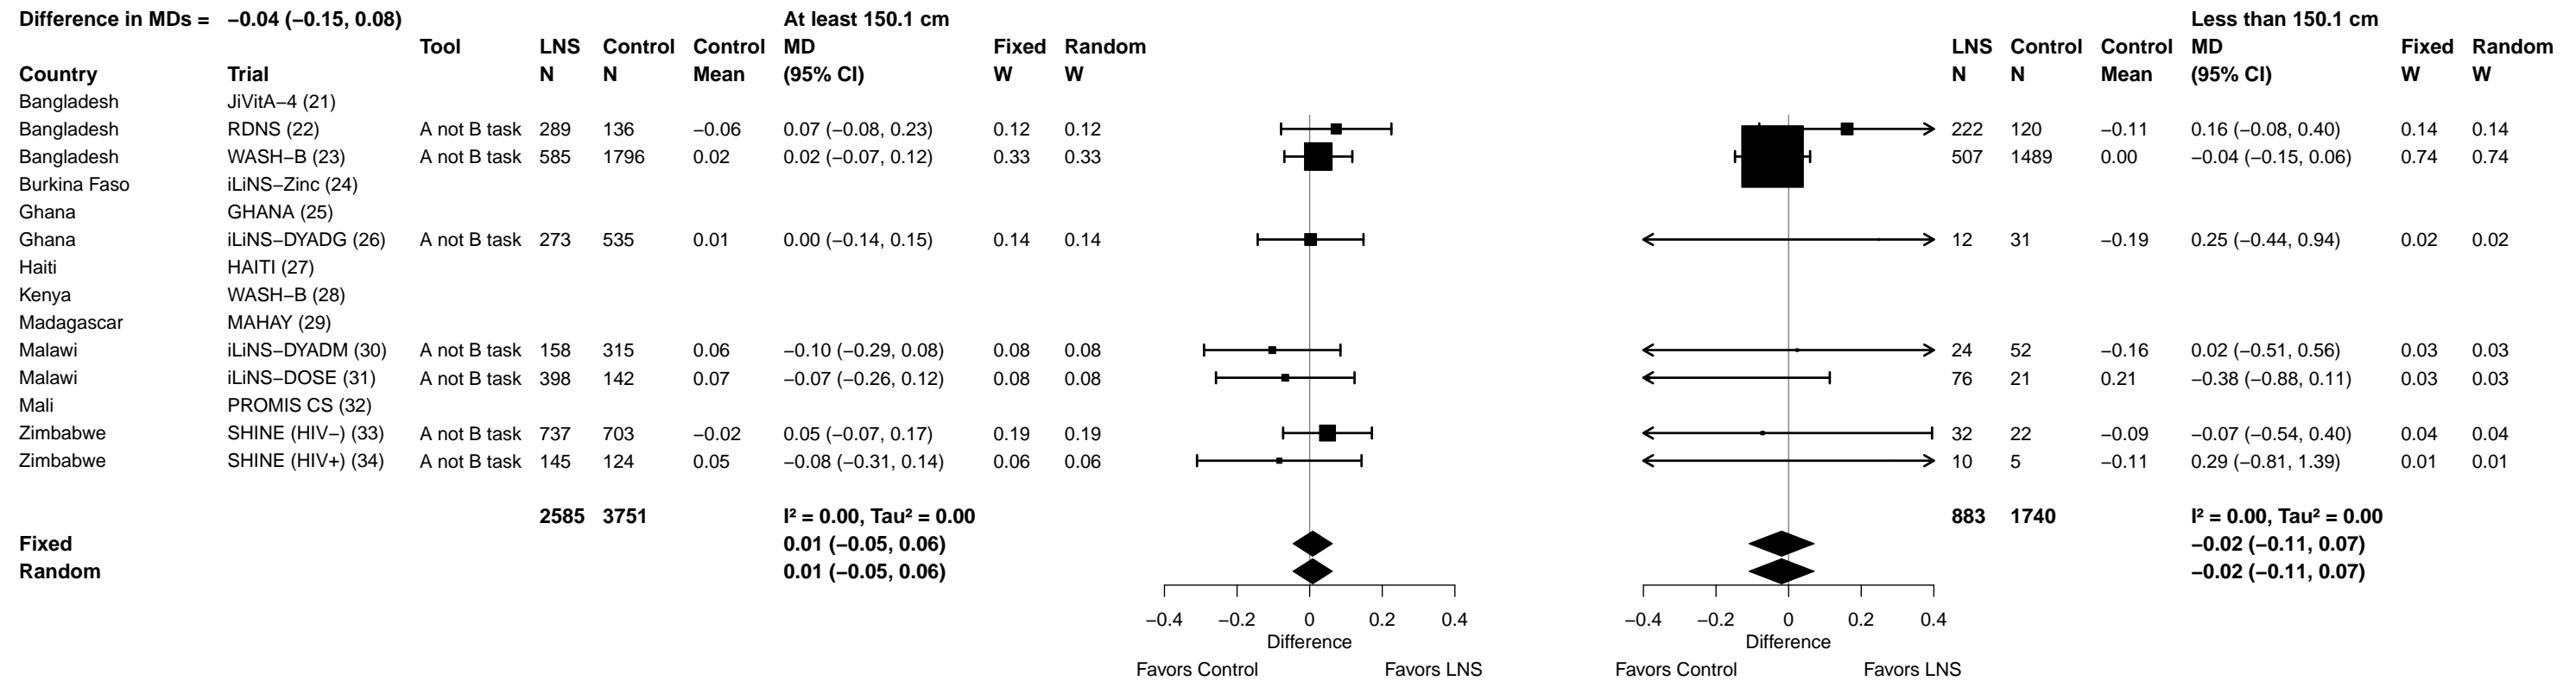



Supplemental figure 5L: Mean difference in executive function z-score

5L2: Stratified by Maternal BMI

P-for-interaction = 0.888  
 Difference in MDs = 0.01 (-0.09, 0.11)

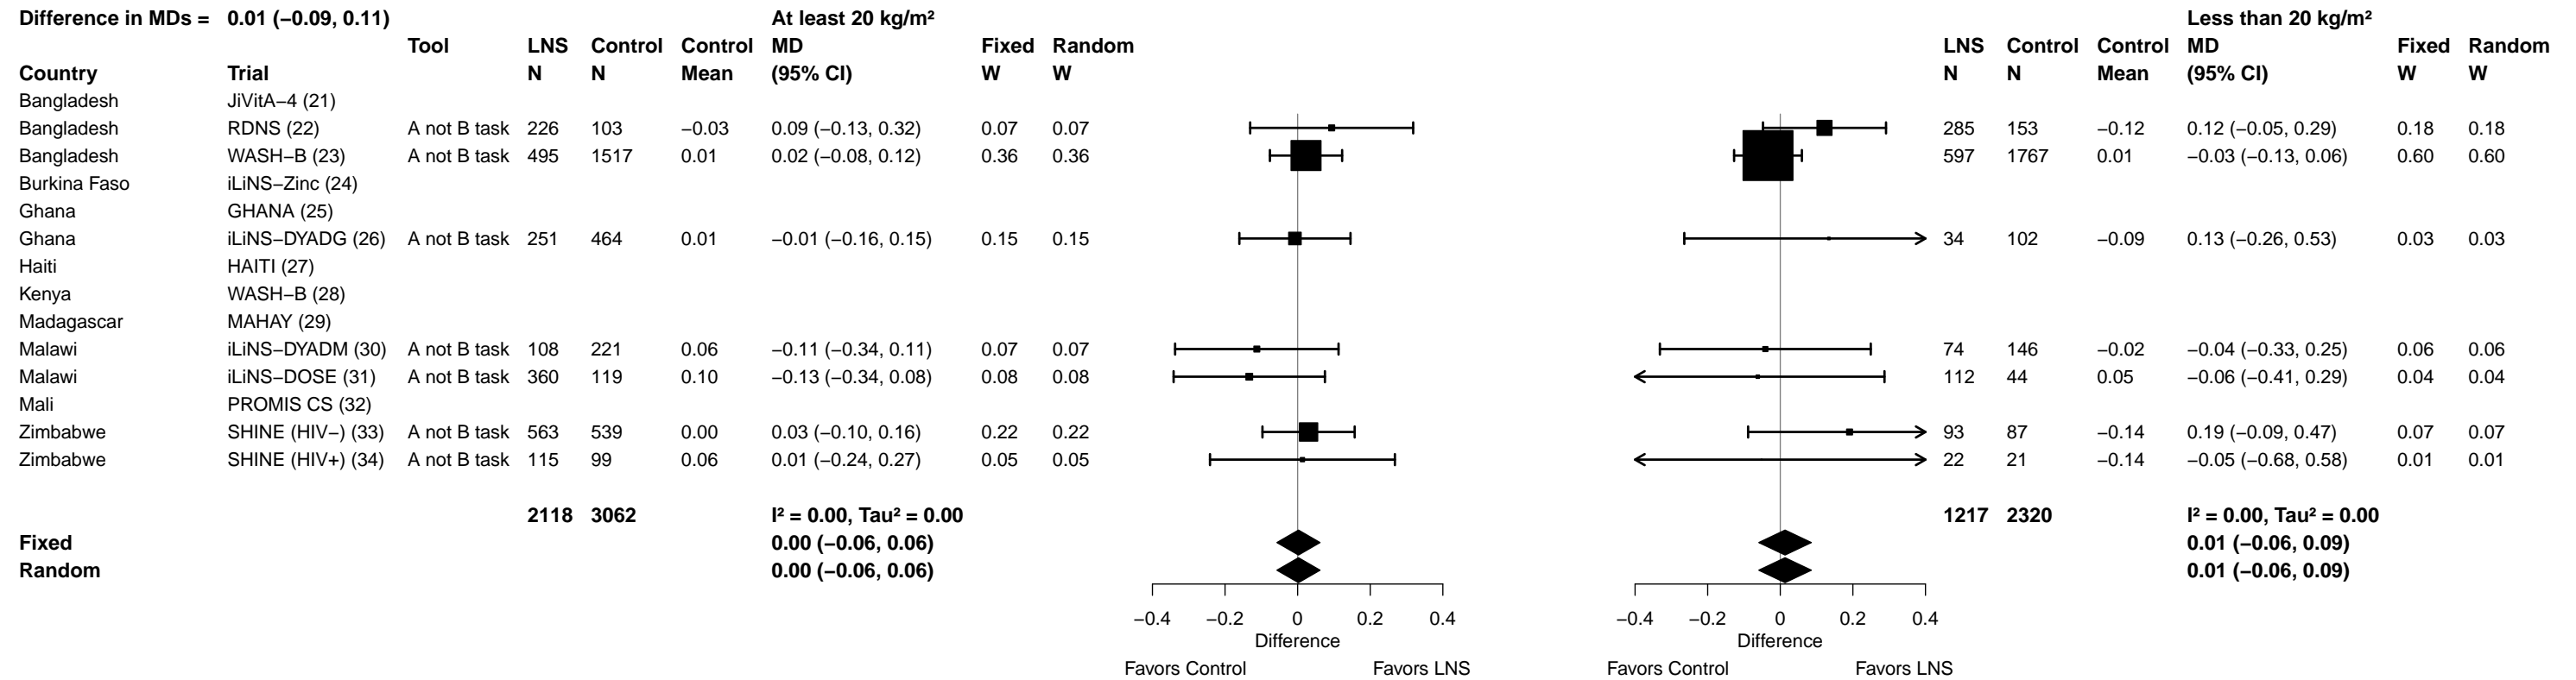

Supplemental figure 5L: Mean difference in executive function z-score

5L3: Stratified by Maternal age

**P-for-interaction = 0.470**  
**Difference in MDs = 0.04 (-0.06, 0.13)**

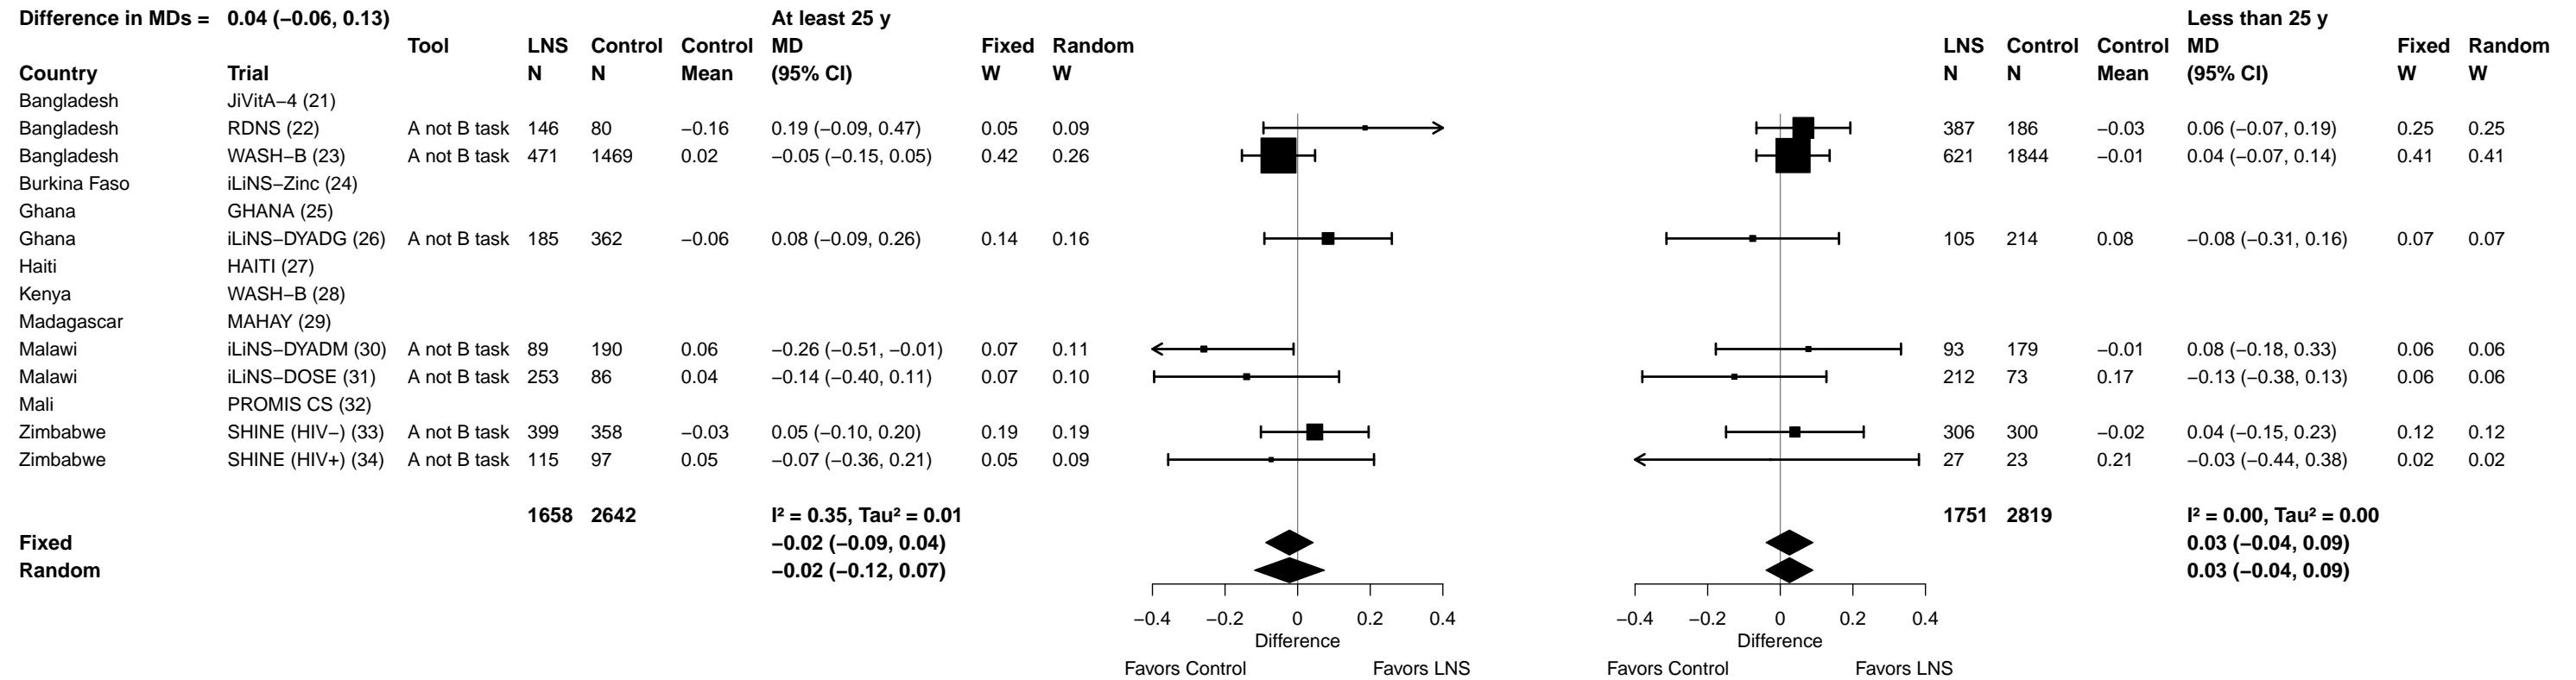

Supplemental figure 5L: Mean difference in executive function z-score

5L4: Stratified by Maternal education

**P-for-interaction = 0.495**  
**Difference in MDs = 0.04 (-0.08, 0.16)**

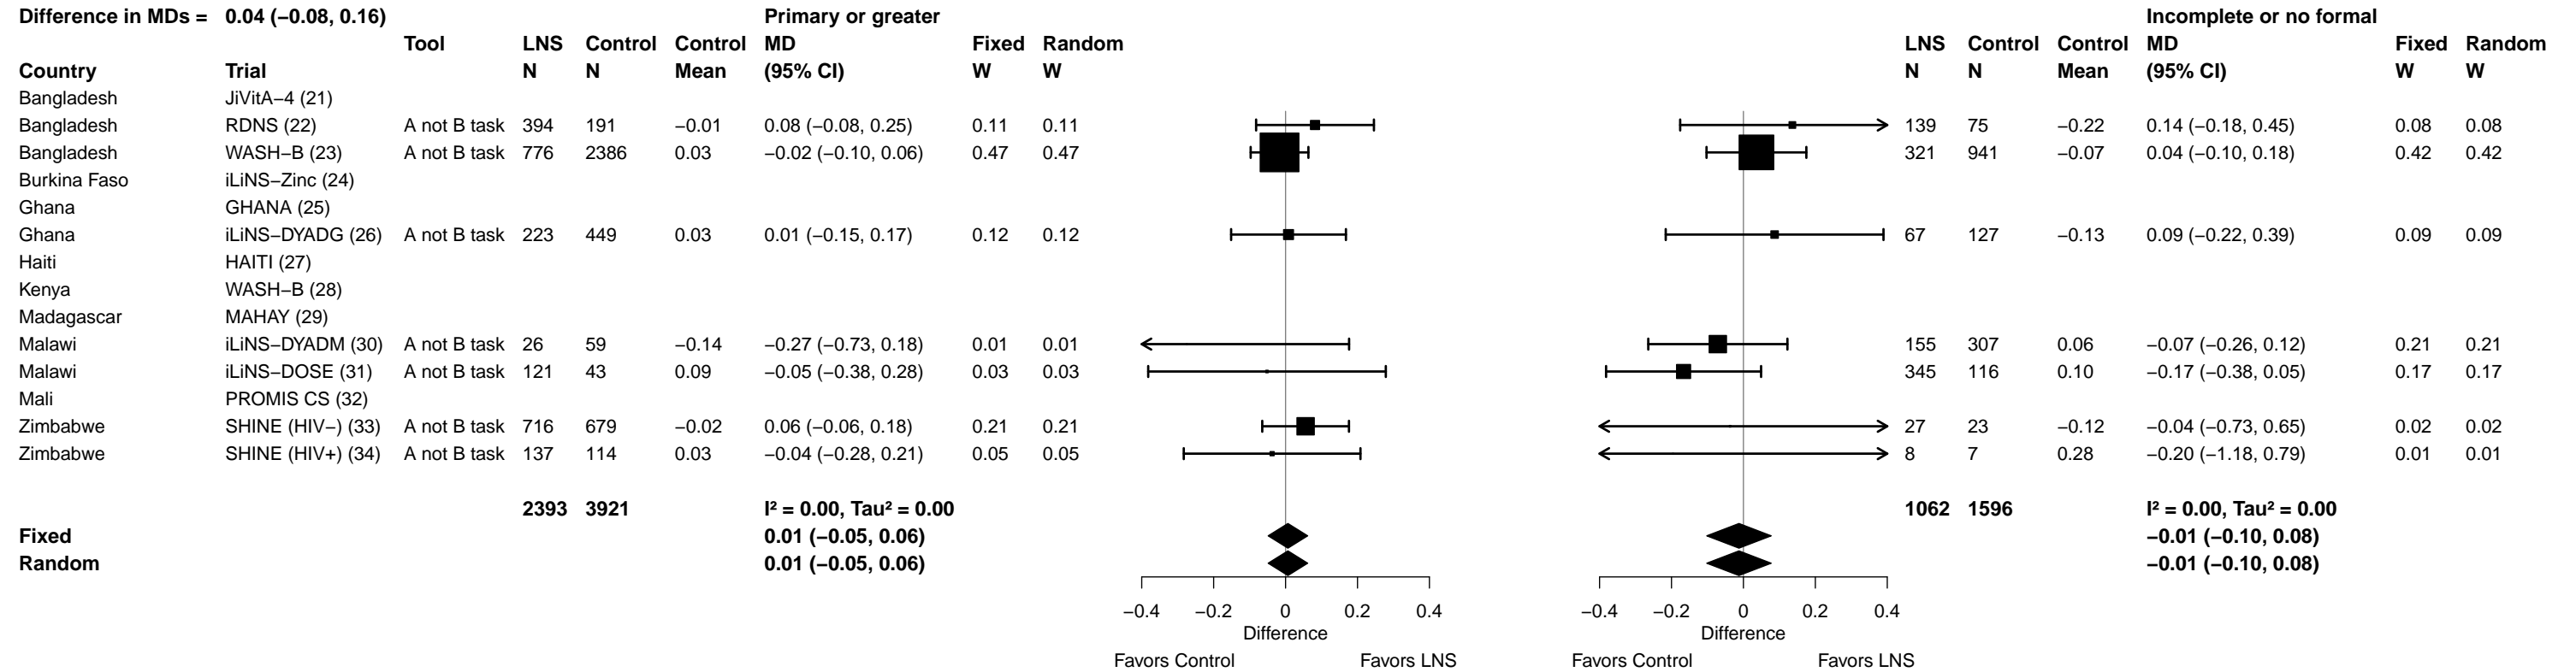

Supplemental figure 5L: Mean difference in executive function z-score

5L5: Stratified by Maternal depressive symptoms

**P-for-interaction = 0.332**  
**Difference in MDs = 0.06 (-0.06, 0.17)**

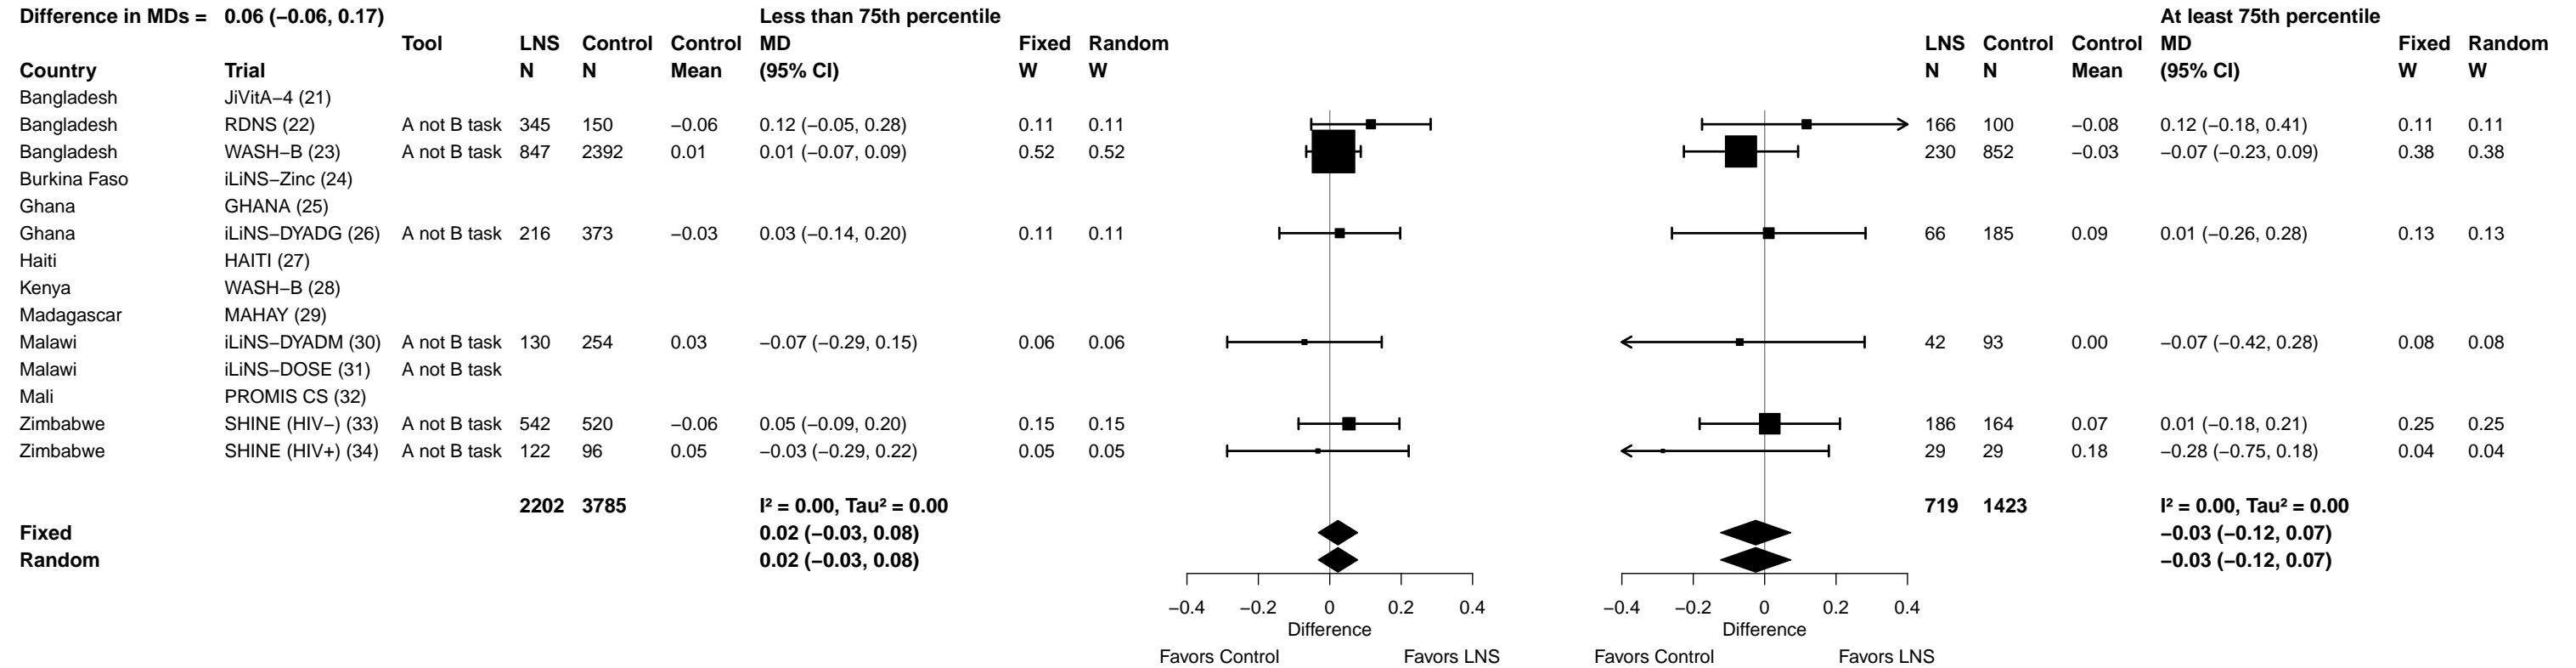

Supplemental figure 5L: Mean difference in executive function z-score

5L6: Stratified by Child sex

P-for-interaction = 0.414  
 Difference in MDs = -0.04 (-0.12, 0.05)

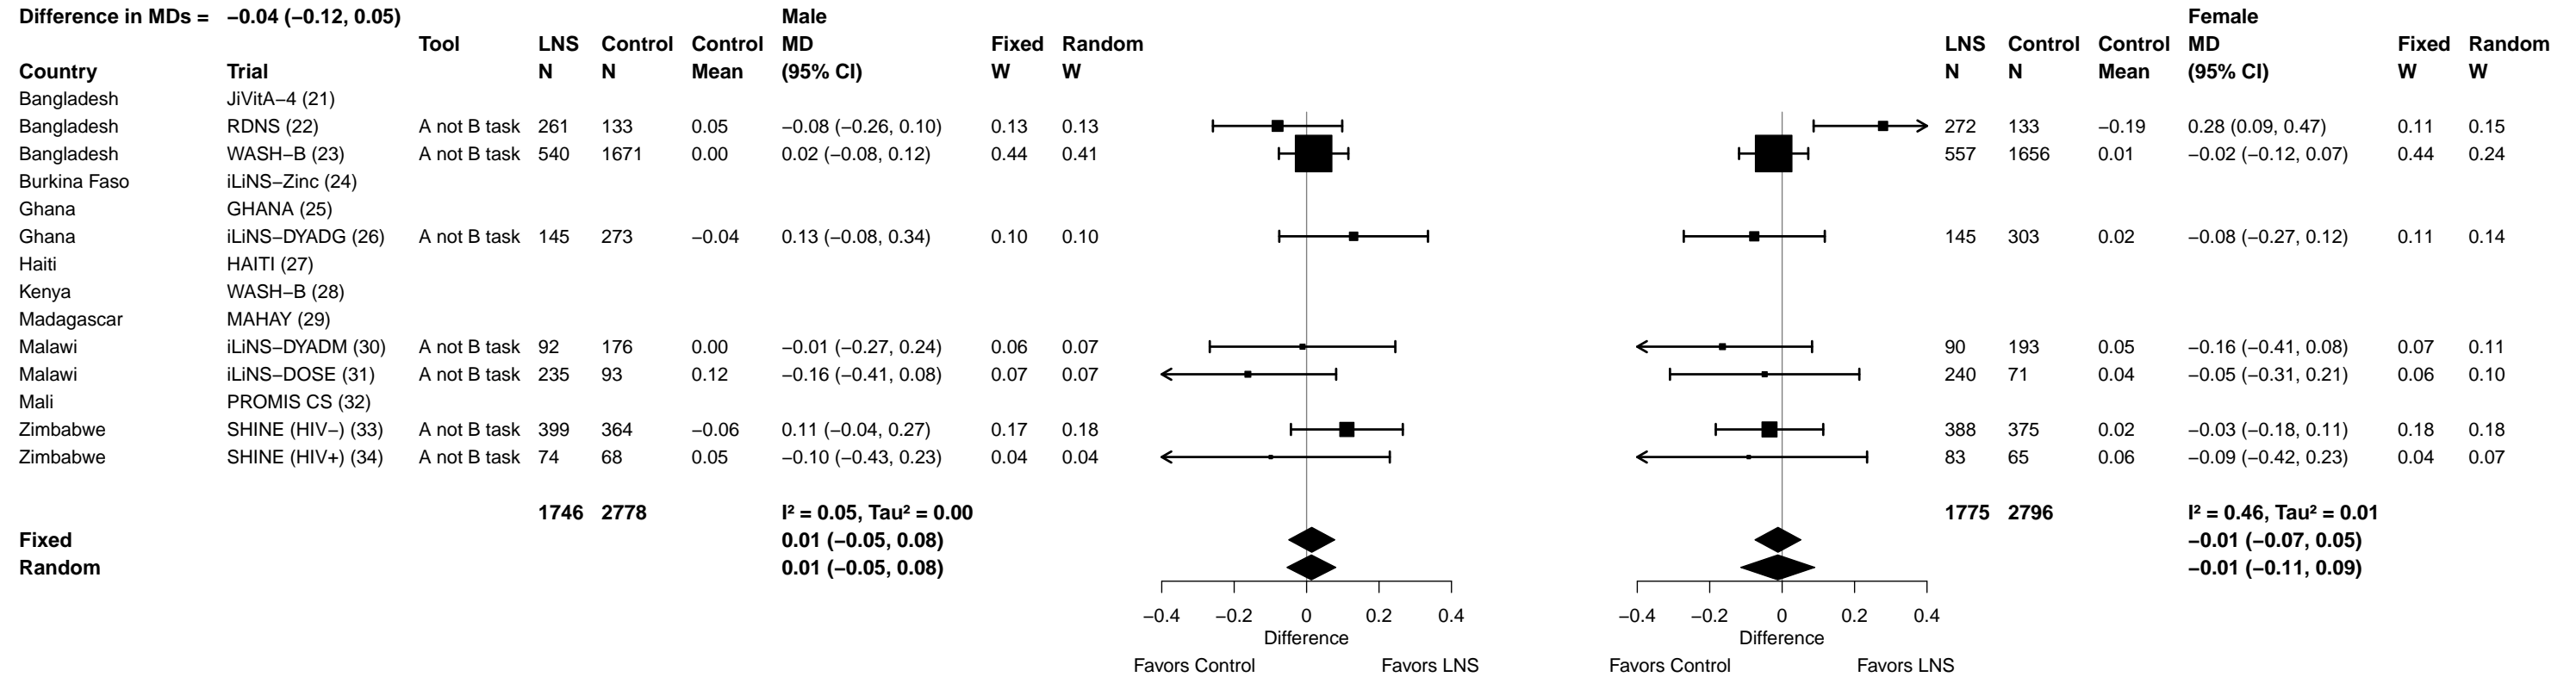

Supplemental figure 5L: Mean difference in executive function z-score

5L7: Stratified by Child birth order

**P-for-interaction = 0.285**  
**Difference in MDs = 0.05 (-0.04, 0.15)**

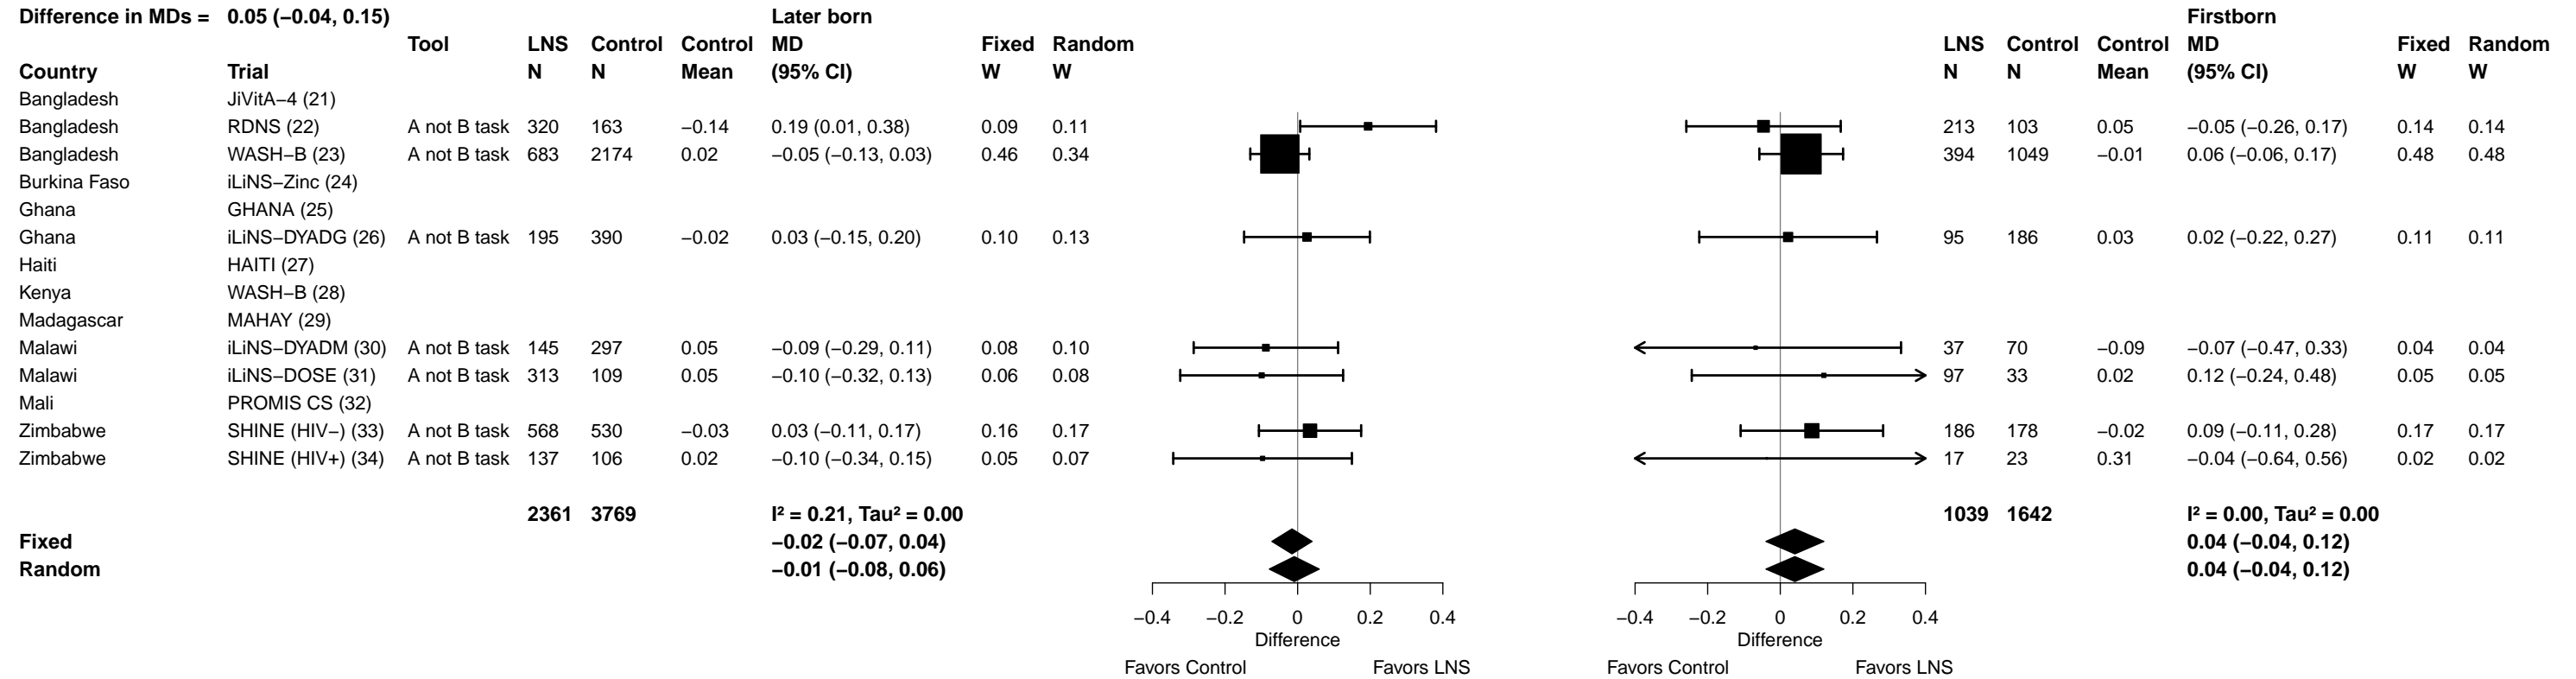

Supplemental figure 5L: Mean difference in executive function z-score

5L8: Stratified by Child baseline stunting

P-for-interaction = 0.702  
 Difference in MDs = -0.03 (-0.20, 0.13)

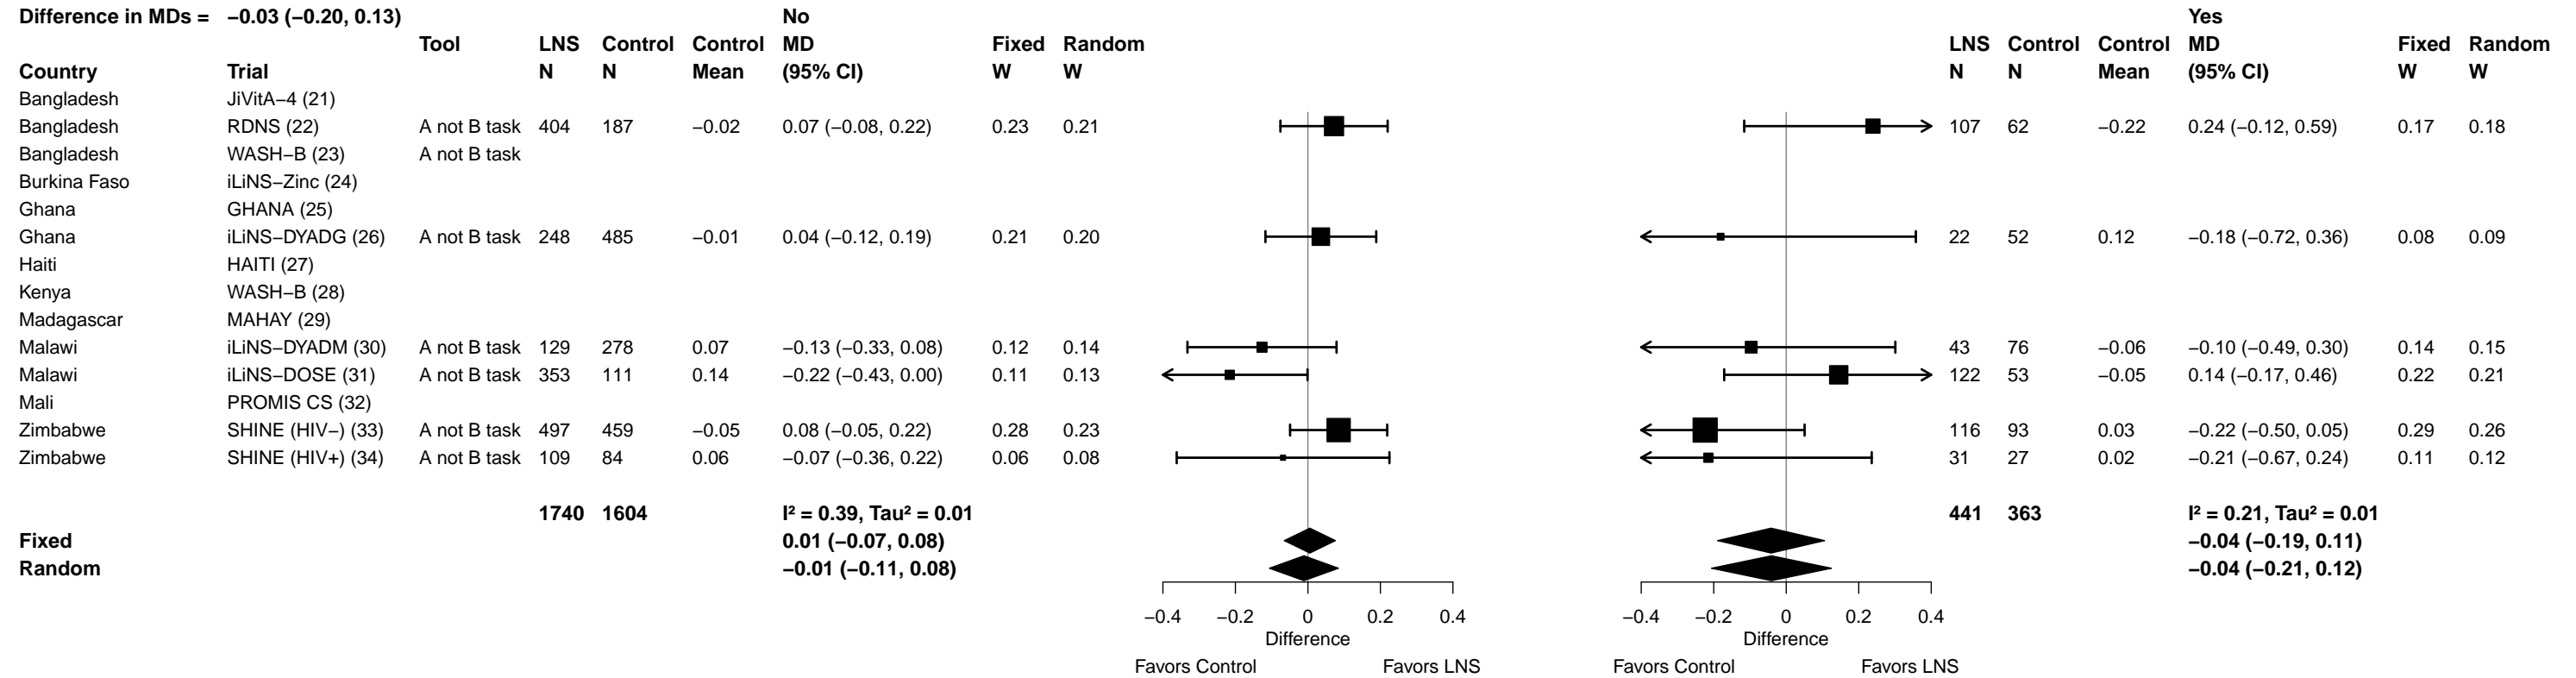

Supplemental figure 5L: Mean difference in executive function z-score

5L9: Stratified by Child baseline acute malnutrition

**P-for-interaction = 0.166**  
**Difference in MDs = 0.19 (-0.08, 0.47)**

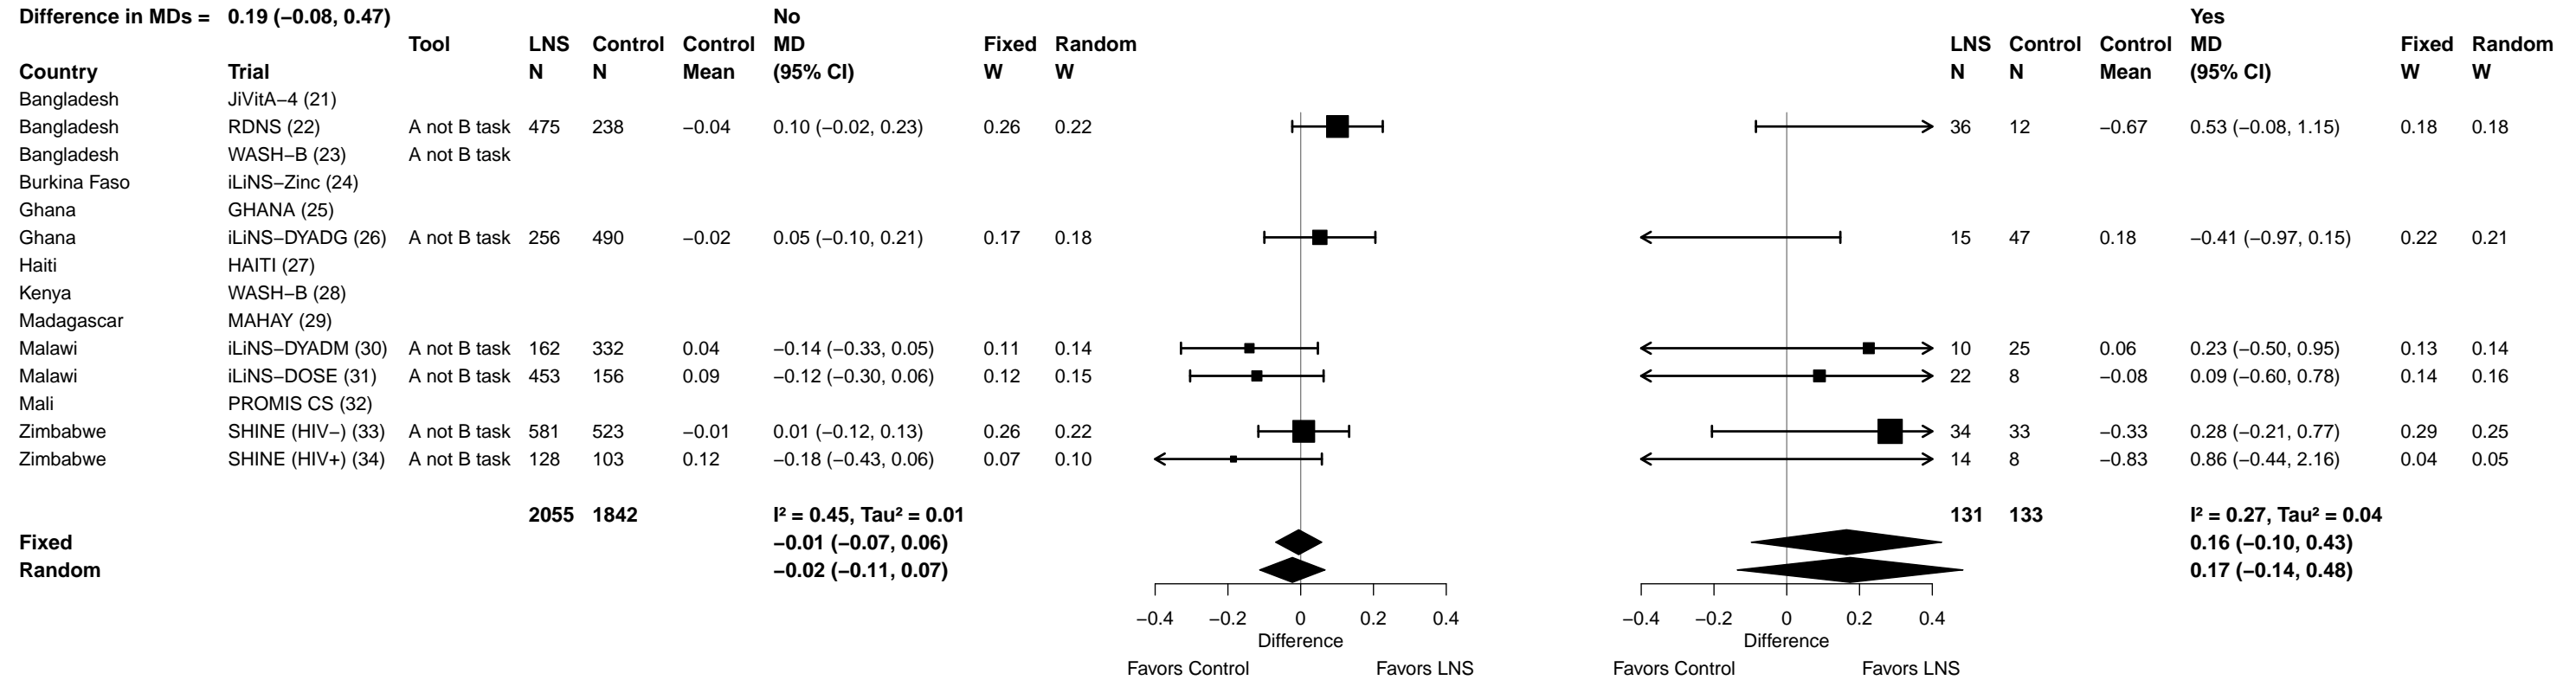



Supplemental figure 5L: Mean difference in executive function z-score

5L10: Stratified by Child baseline anemia

**P-for-interaction = 0.567**  
**Difference in MDs = 0.05 (-0.12, 0.22)**

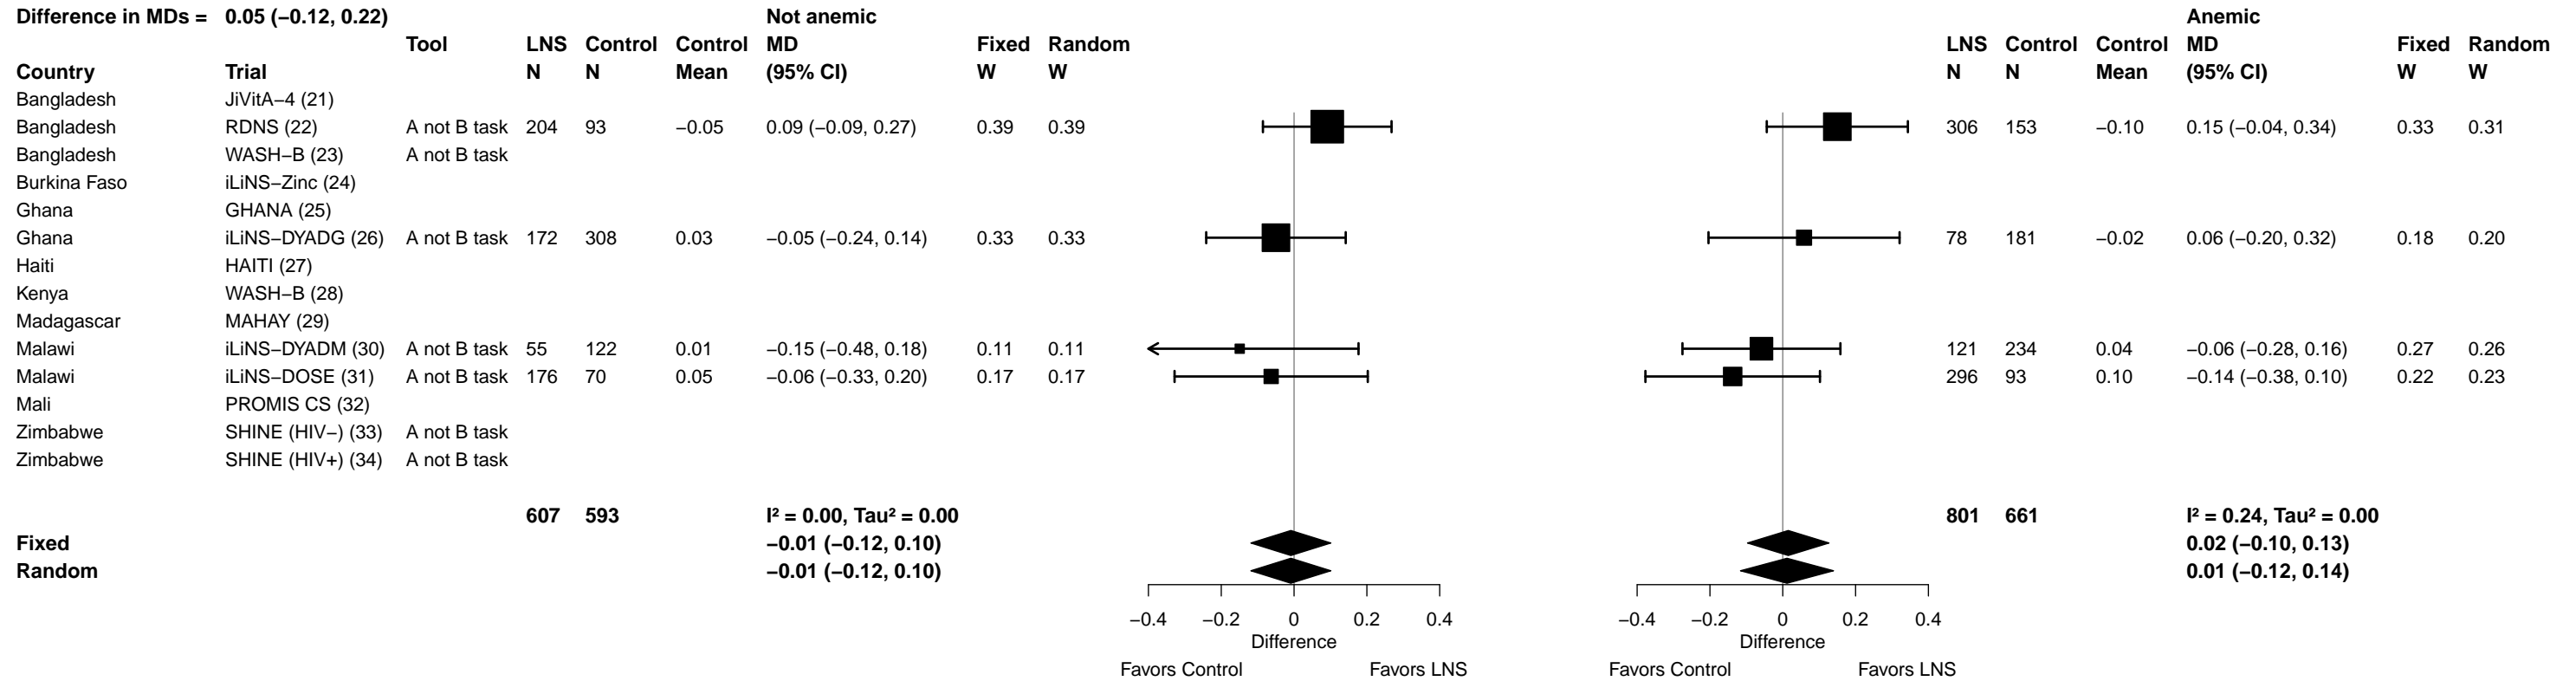

**Supplemental figure 5M: Executive function lowest decile prevalence ratio**

5M1: Stratified by Maternal height (insufficient comparisons)

Supplemental figure 5M: Executive function lowest decile prevalence ratio

5M2: Stratified by Maternal BMI

P-for-interaction = 0.977

Ratio of PRs = 1.00 (0.72, 1.40)

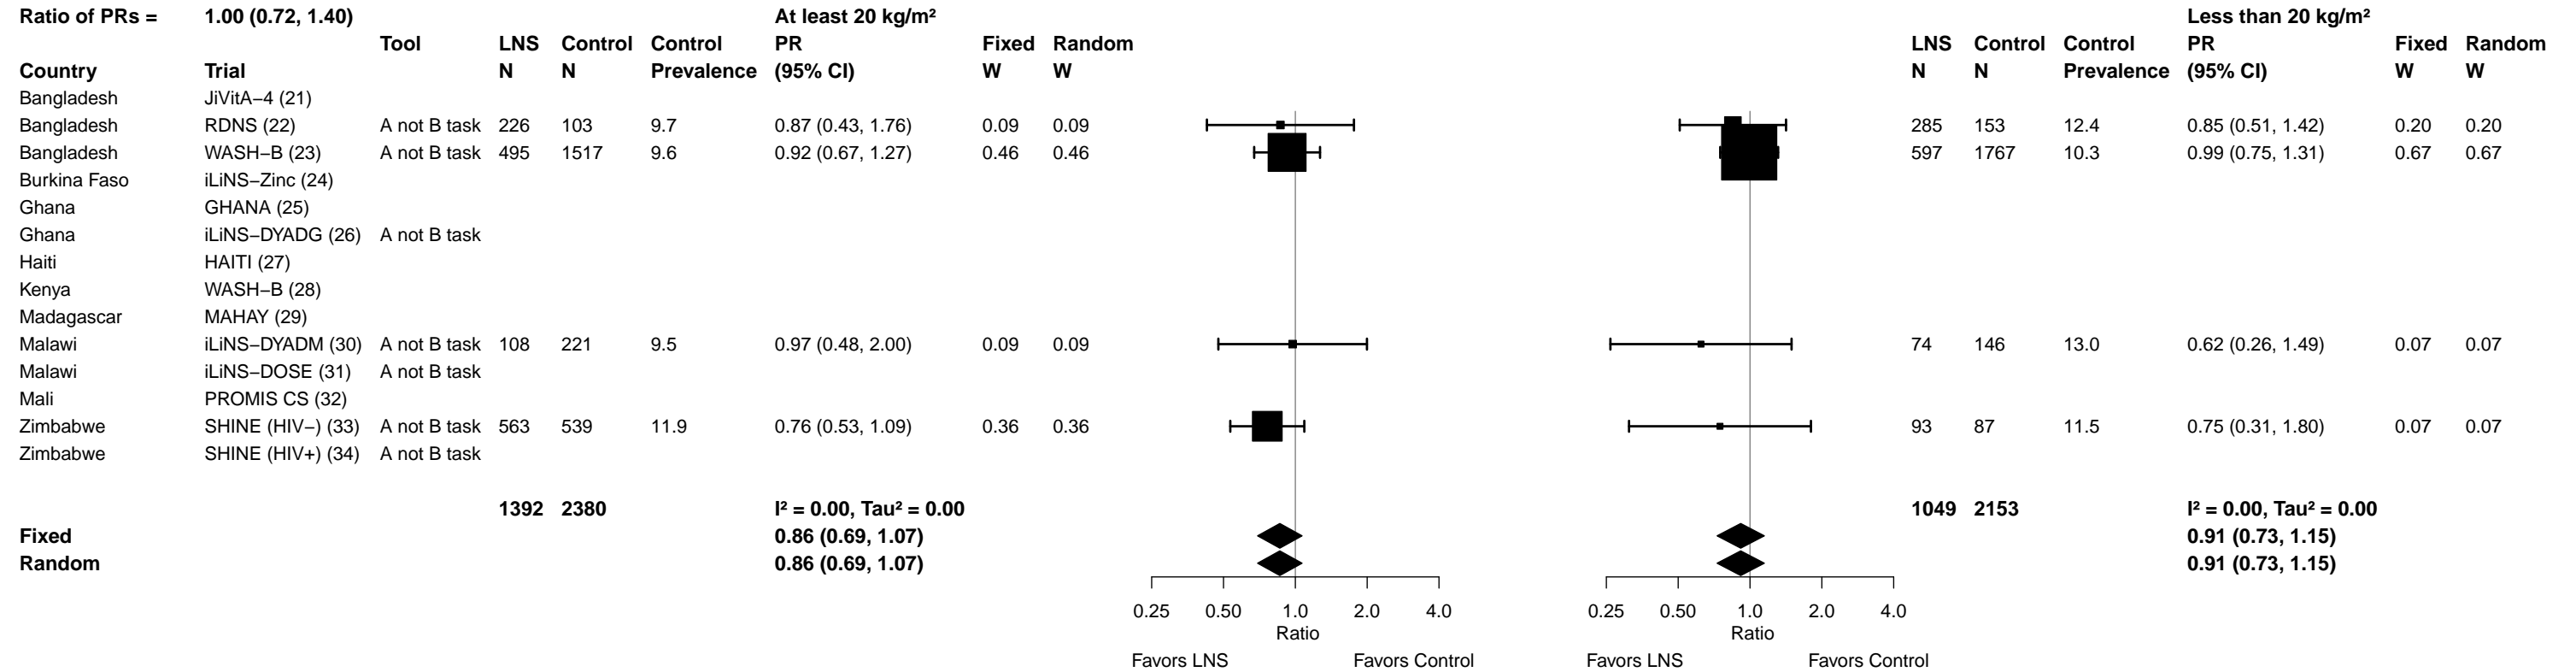

Supplemental figure 5M: Executive function lowest decile prevalence ratio

5M3: Stratified by Maternal age

P-for-interaction = 0.088

Ratio of PRs = 0.76 (0.55, 1.04)

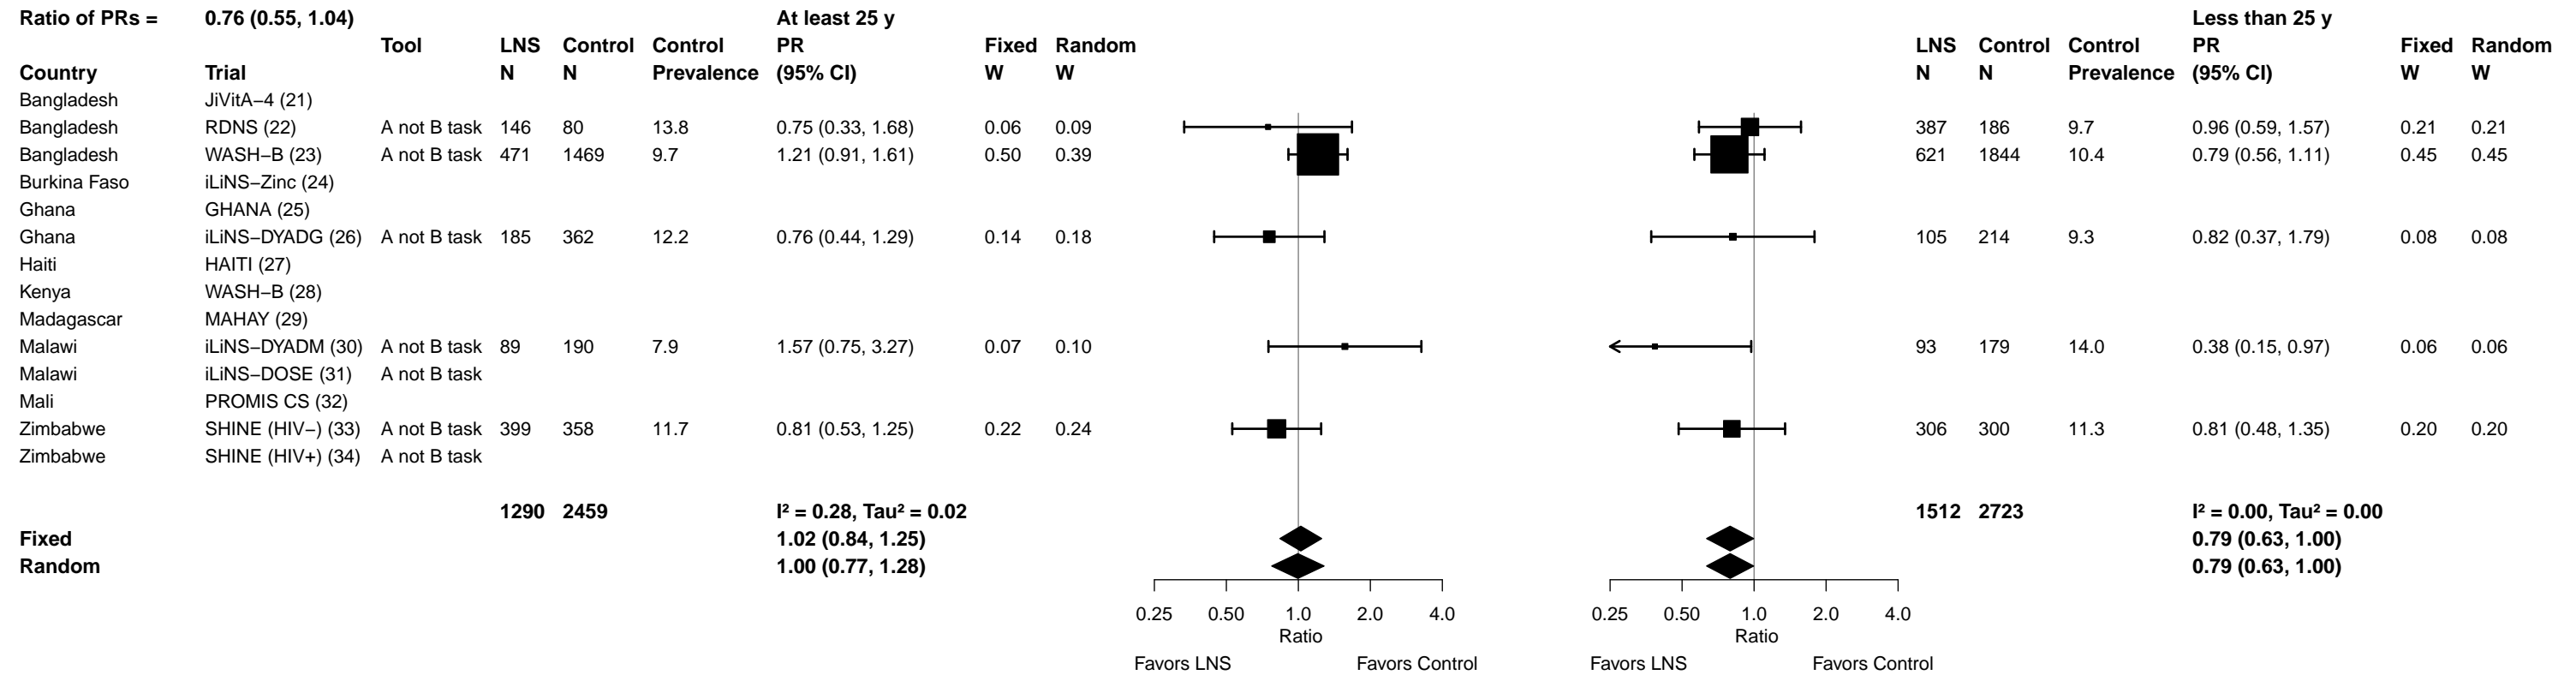

Supplemental figure 5M: Executive function lowest decile prevalence ratio

5M4: Stratified by Maternal education

P-for-interaction = 0.865  
 Ratio of PRs = 1.03 (0.73, 1.46)

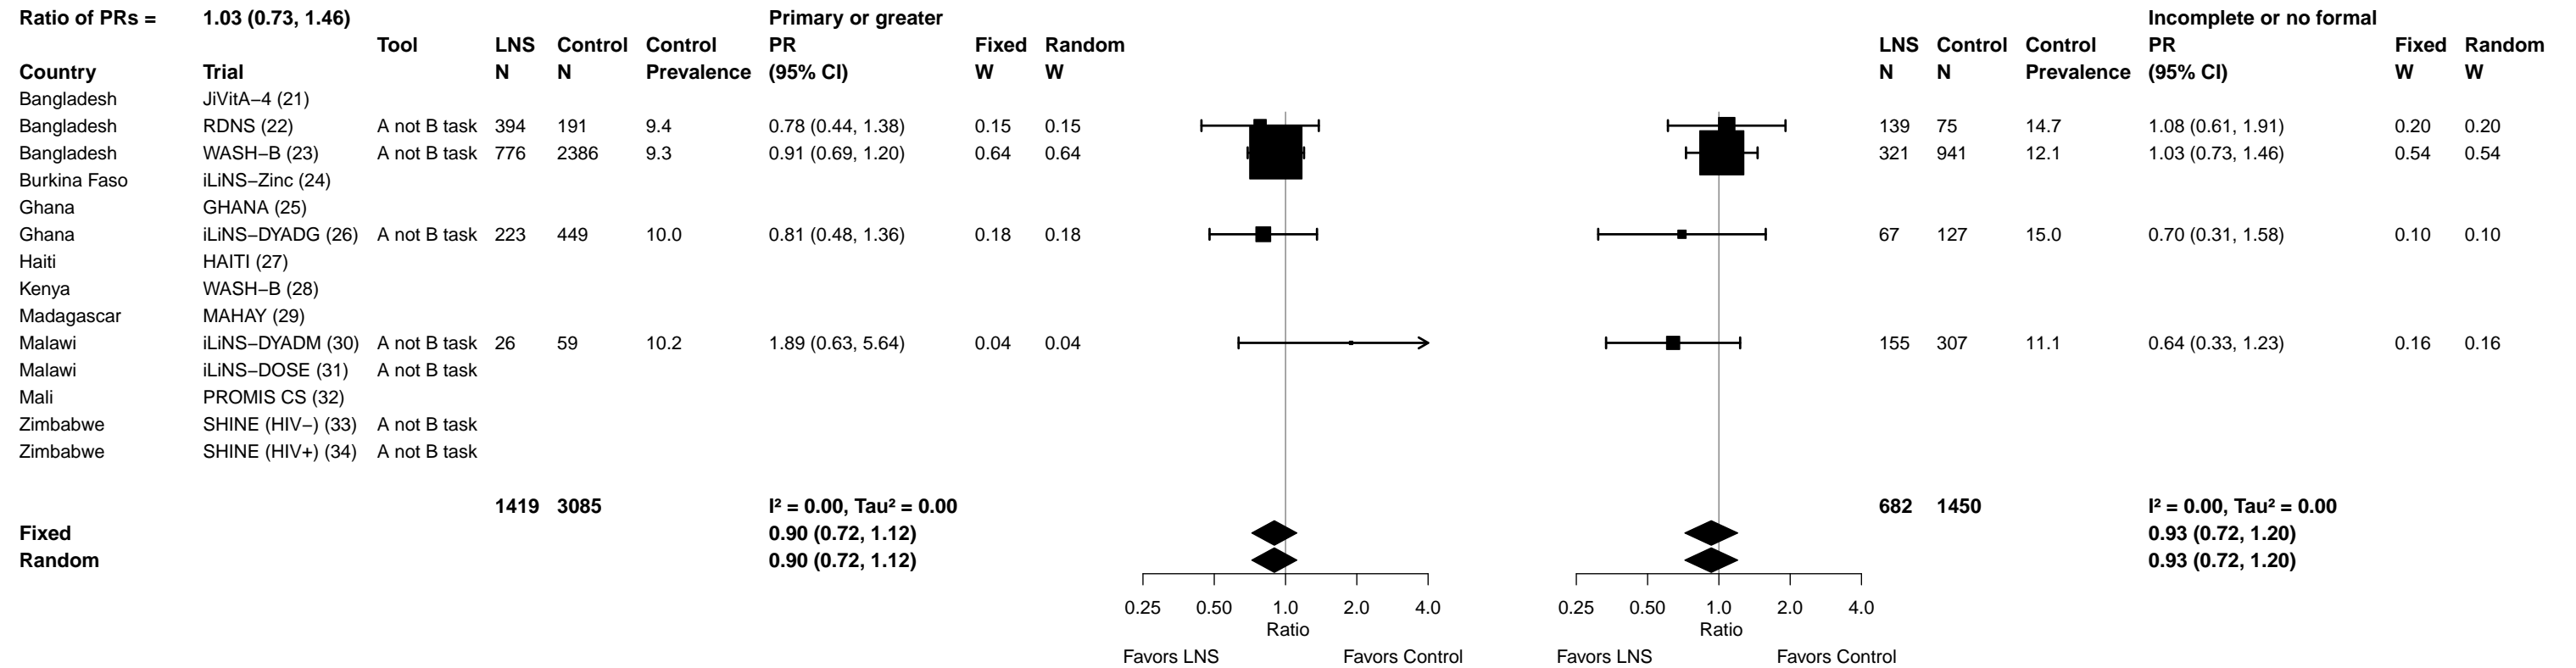

Supplemental figure 5M: Executive function lowest decile prevalence ratio

5M5: Stratified by Maternal depressive symptoms

P-for-interaction = 0.394

Ratio of PRs = 1.18 (0.80, 1.75)

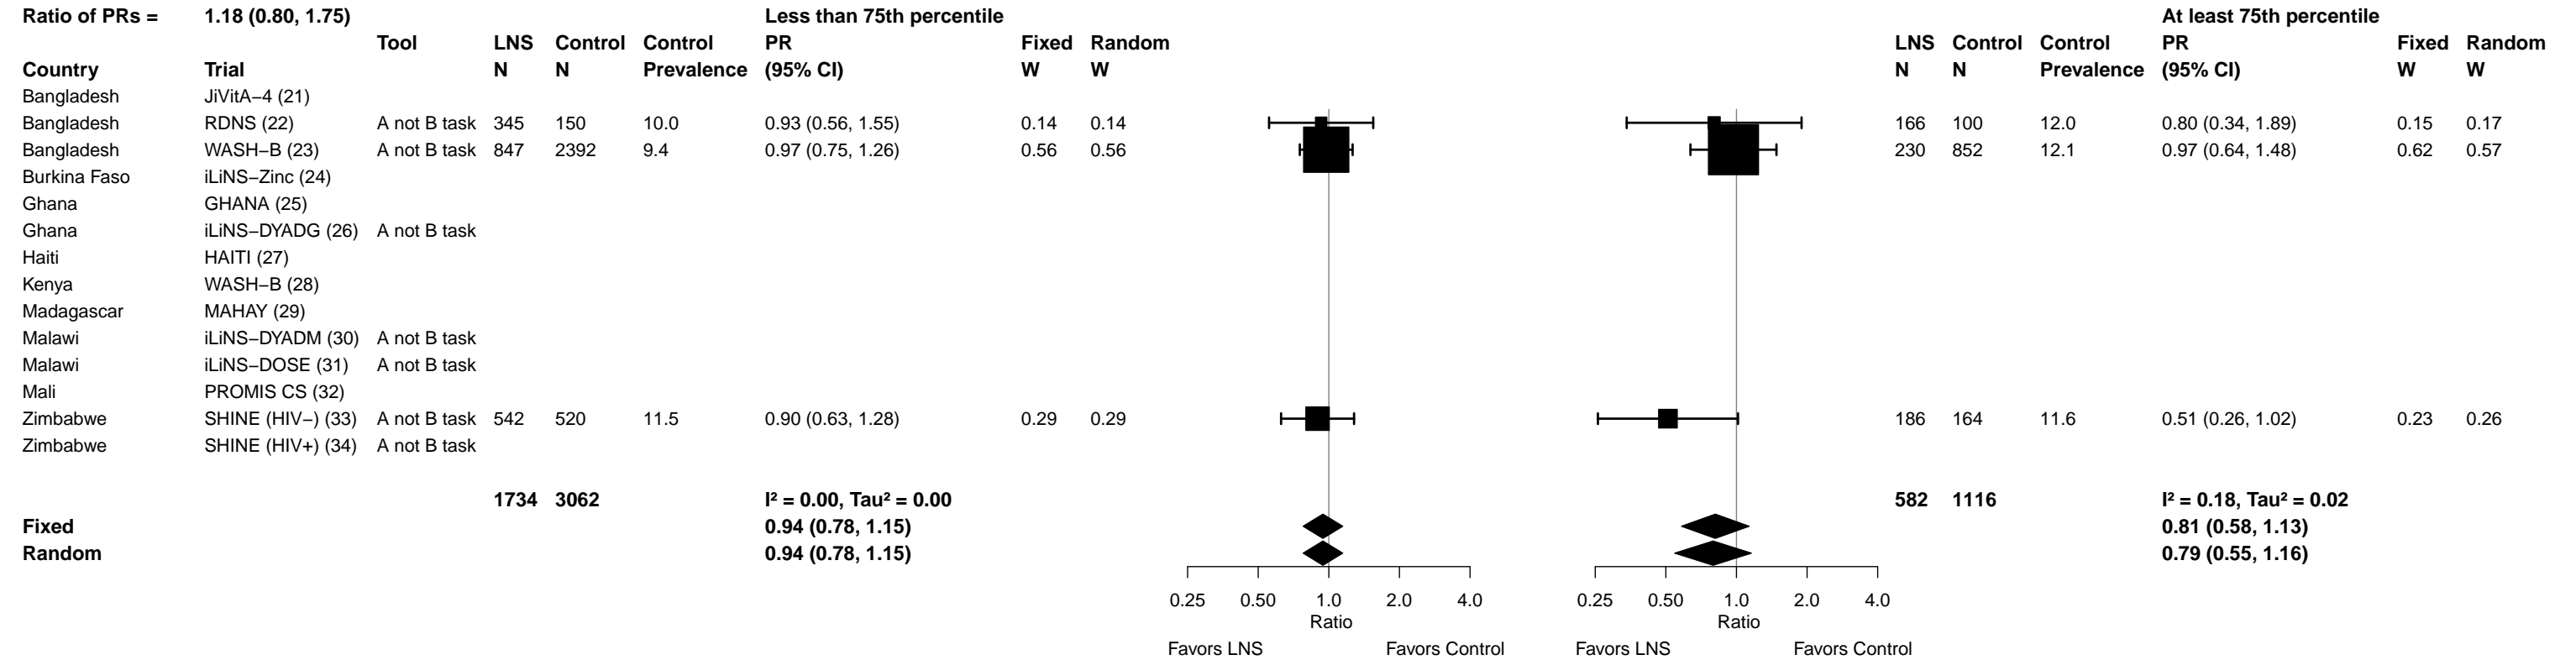

Supplemental figure 5M: Executive function lowest decile prevalence ratio

5M6: Stratified by Child sex

P-for-interaction = 0.231

Ratio of PRs = 1.19 (0.90, 1.57)

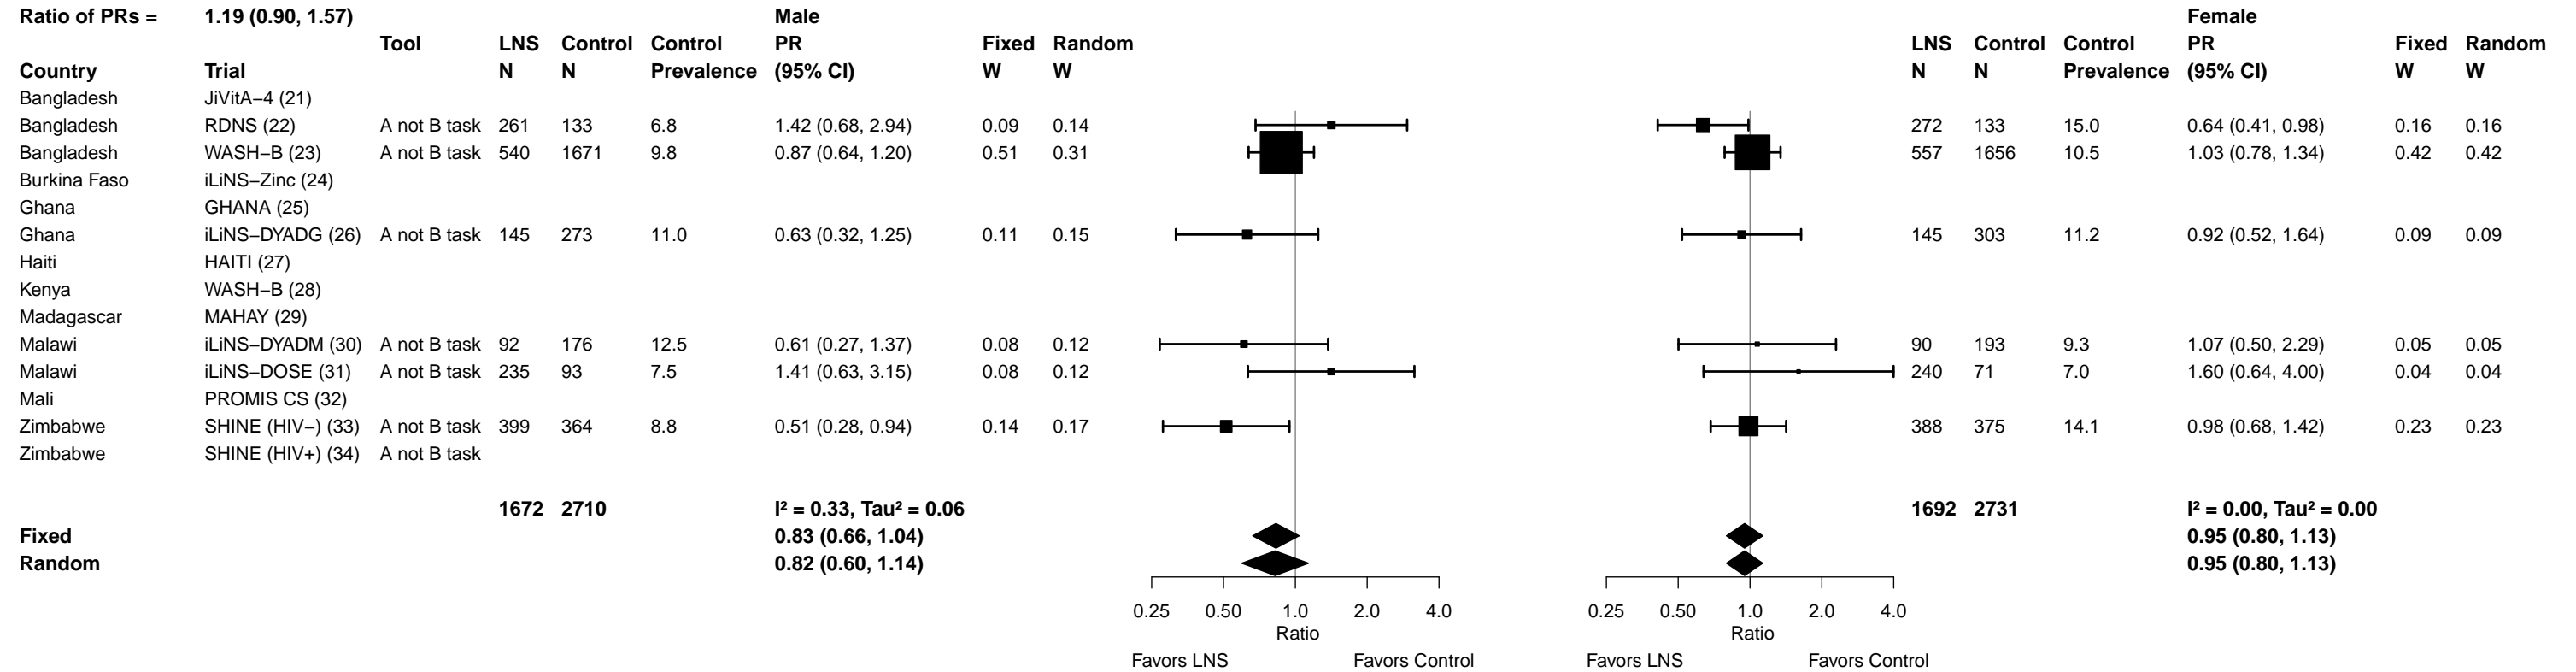

Supplemental figure 5M: Executive function lowest decile prevalence ratio

5M7: Stratified by Child birth order

P-for-interaction = 0.144  
 Ratio of PRs = 0.78 (0.56, 1.09)

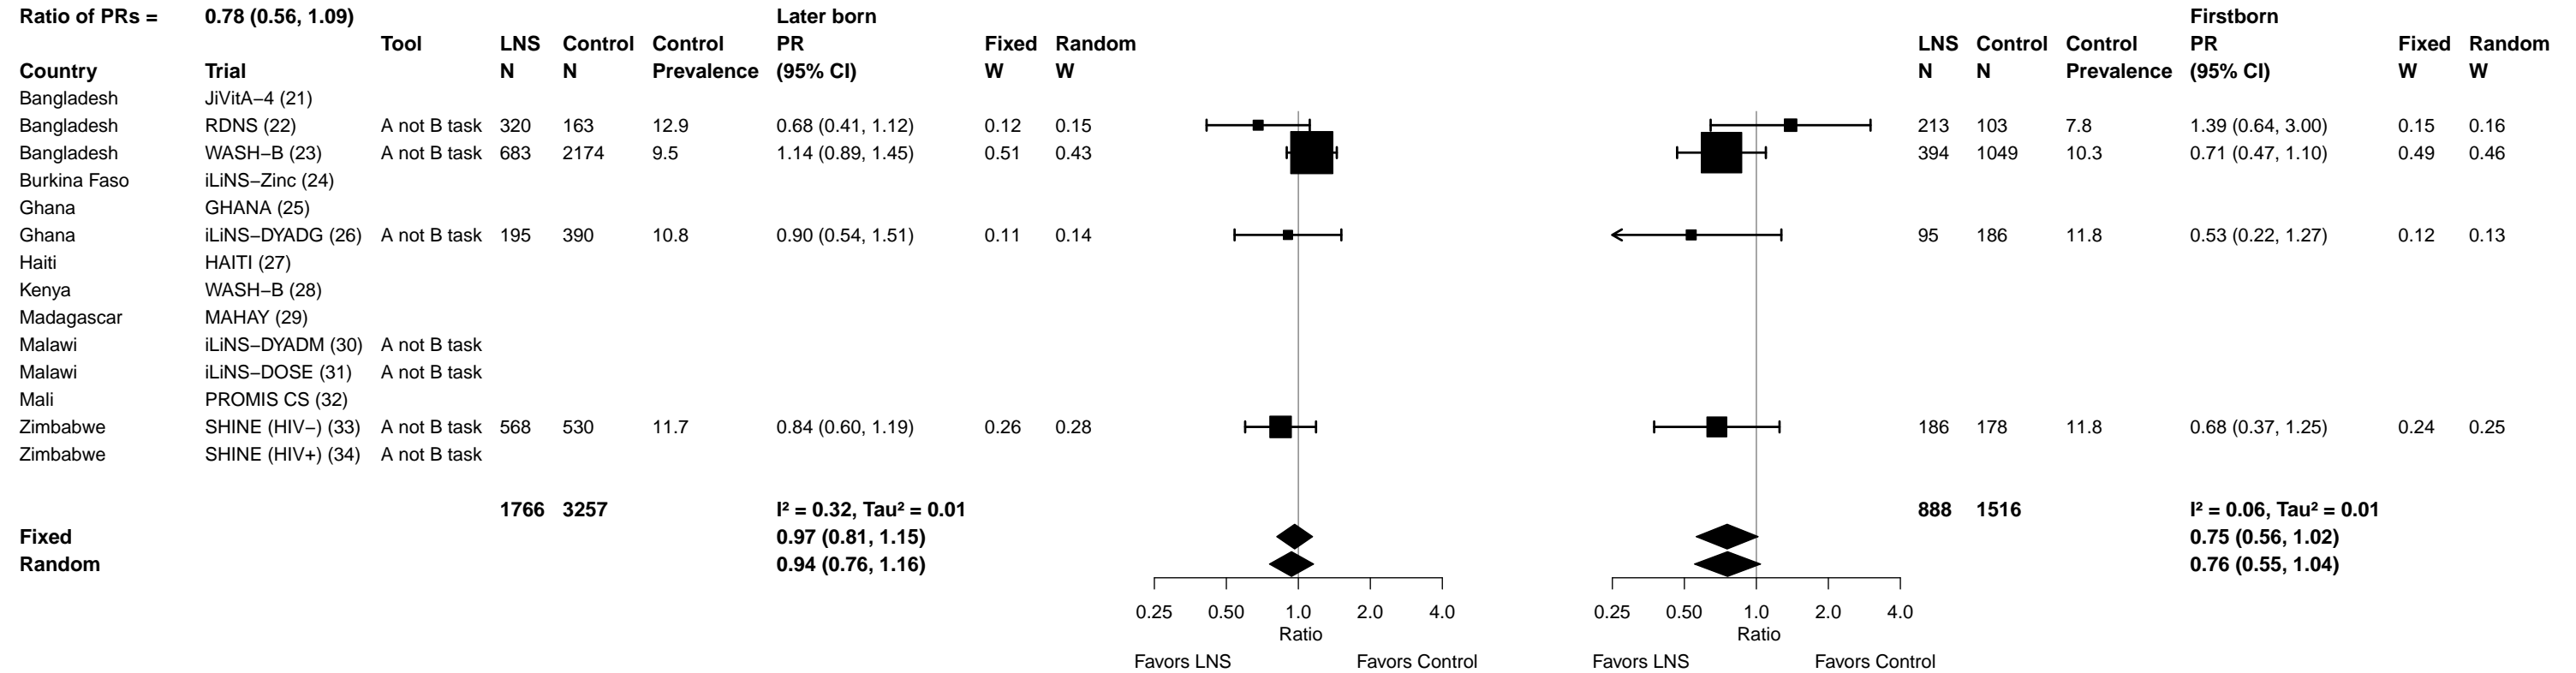



Supplemental figure 5M: Executive function lowest decile prevalence ratio

5M8: Stratified by Child baseline stunting

P-for-interaction = 0.507

Ratio of PRs = 1.23 (0.67, 2.28)

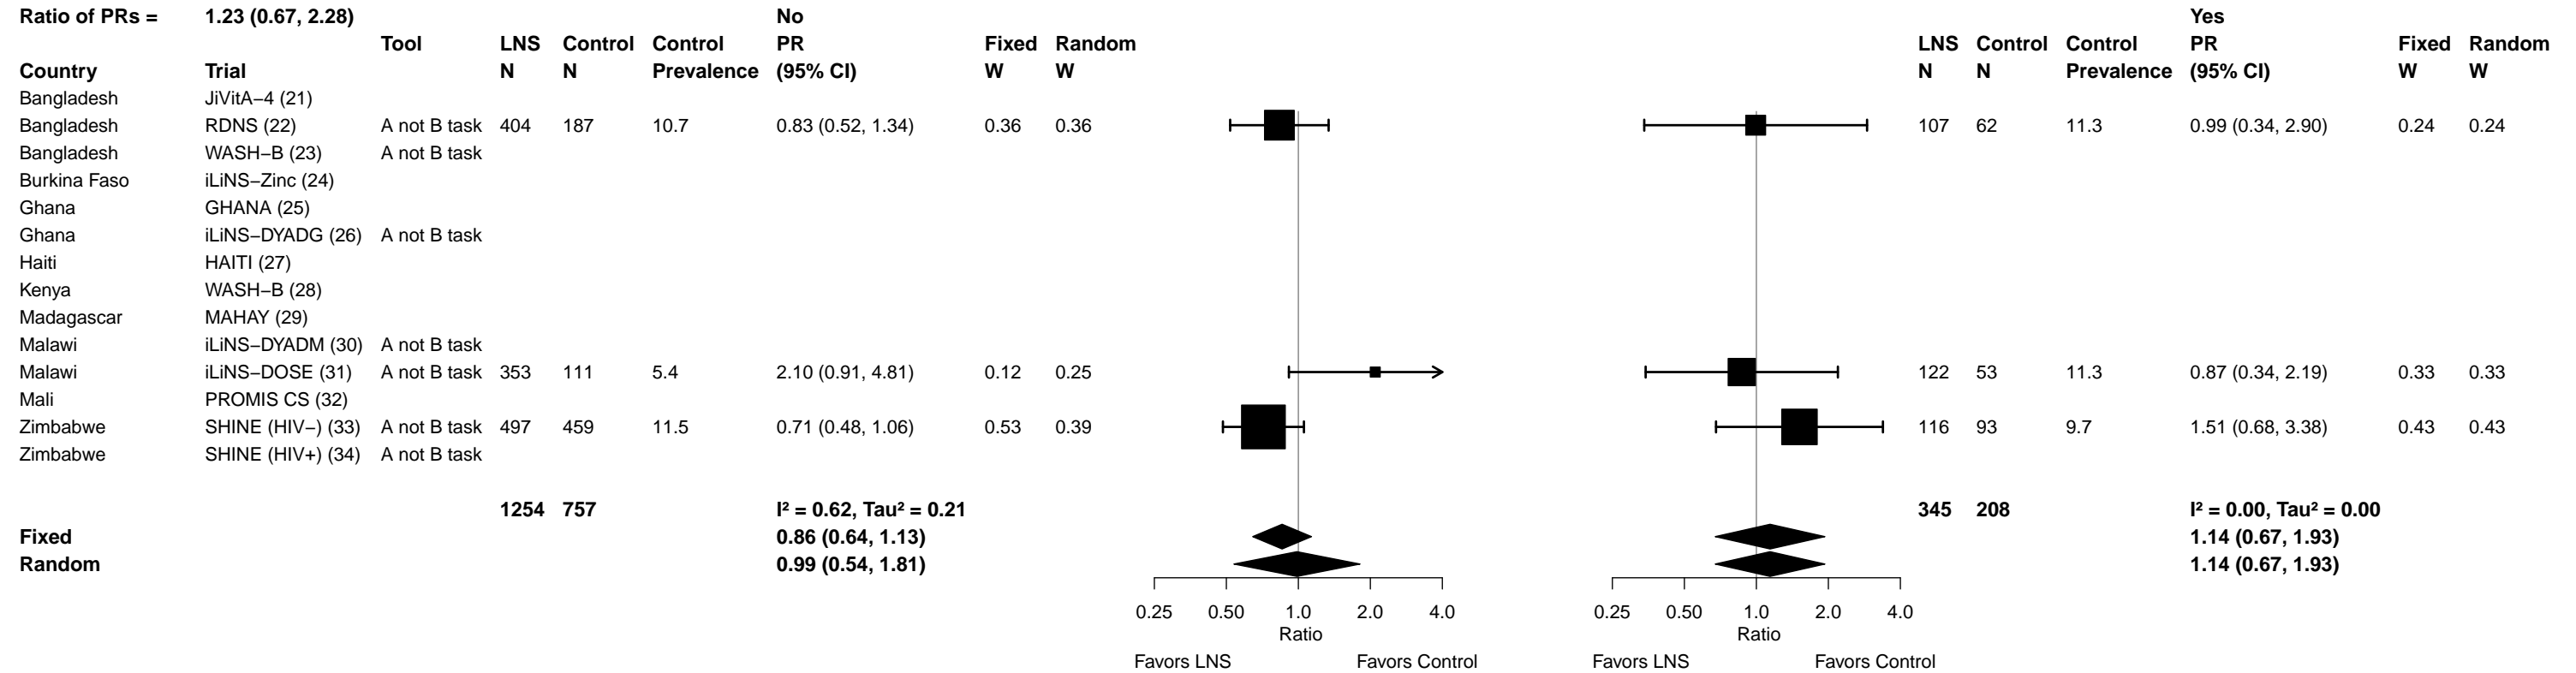

**Supplemental figure 5M: Executive function lowest decile prevalence ratio**

**5M9: Stratified by Child baseline acute malnutrition (insufficient comparisons)**

Supplemental figure 5M: Executive function lowest decile prevalence ratio

5M10: Stratified by Child baseline anemia

P-for-interaction = 0.464

Ratio of PRs = 0.81 (0.47, 1.41)

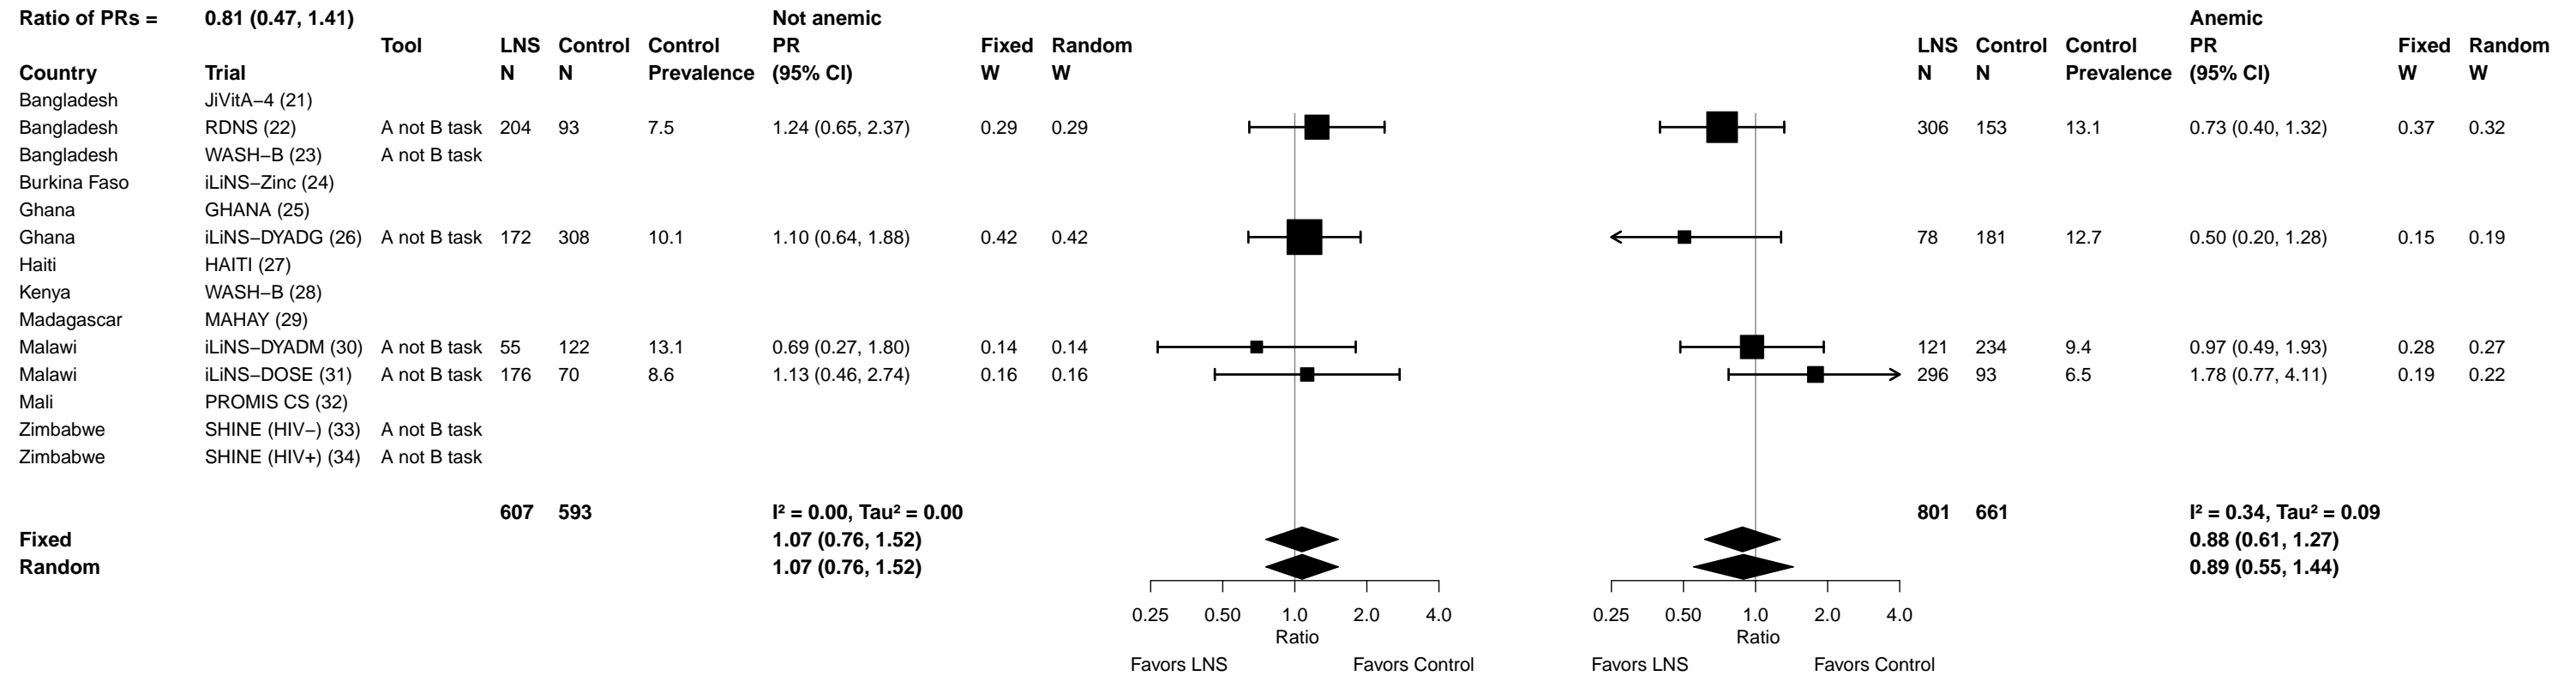

**Supplemental figure 5N: Executive function lowest decile prevalence difference**

5N1: Stratified by Maternal height (insufficient comparisons)

Supplemental figure 5N: Executive function lowest decile prevalence difference

5N2: Stratified by Maternal BMI

P-for-interaction = 0.955  
 Difference in PDs = 0.00 (-0.03, 0.03)

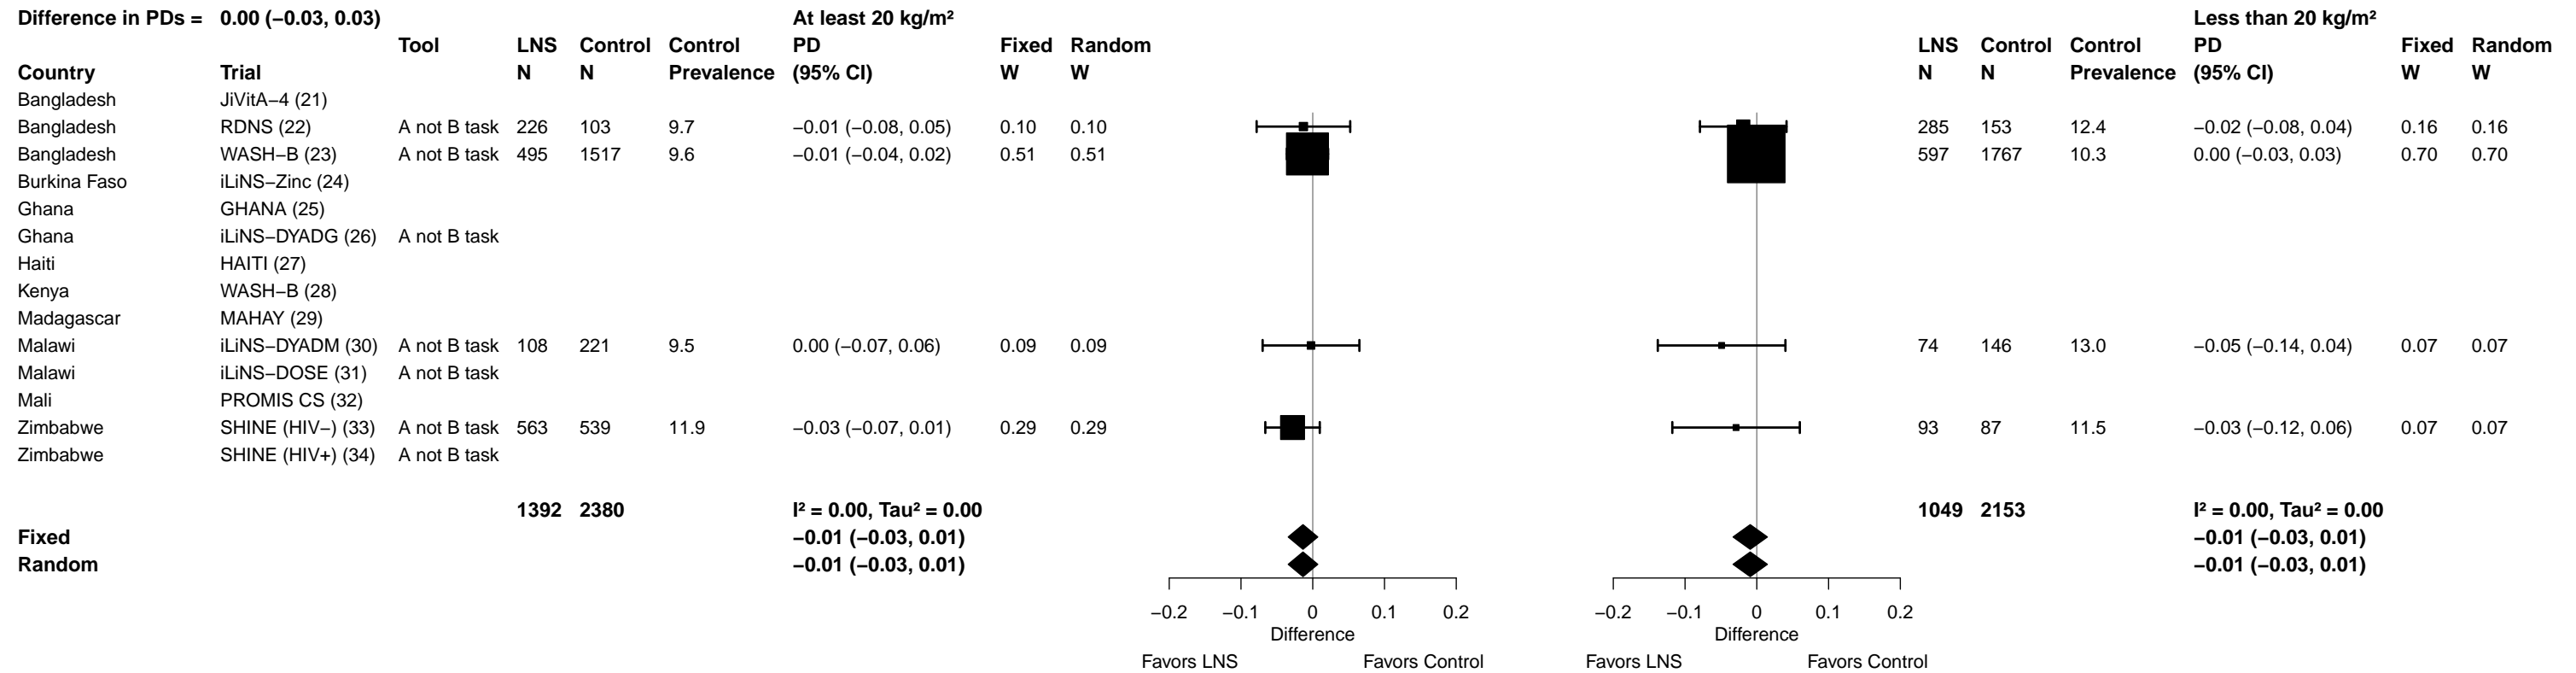

Supplemental figure 5N: Executive function lowest decile prevalence difference

5N3: Stratified by Maternal age

P-for-interaction = 0.066  
 Difference in PDs = -0.03 (-0.06, 0.00)

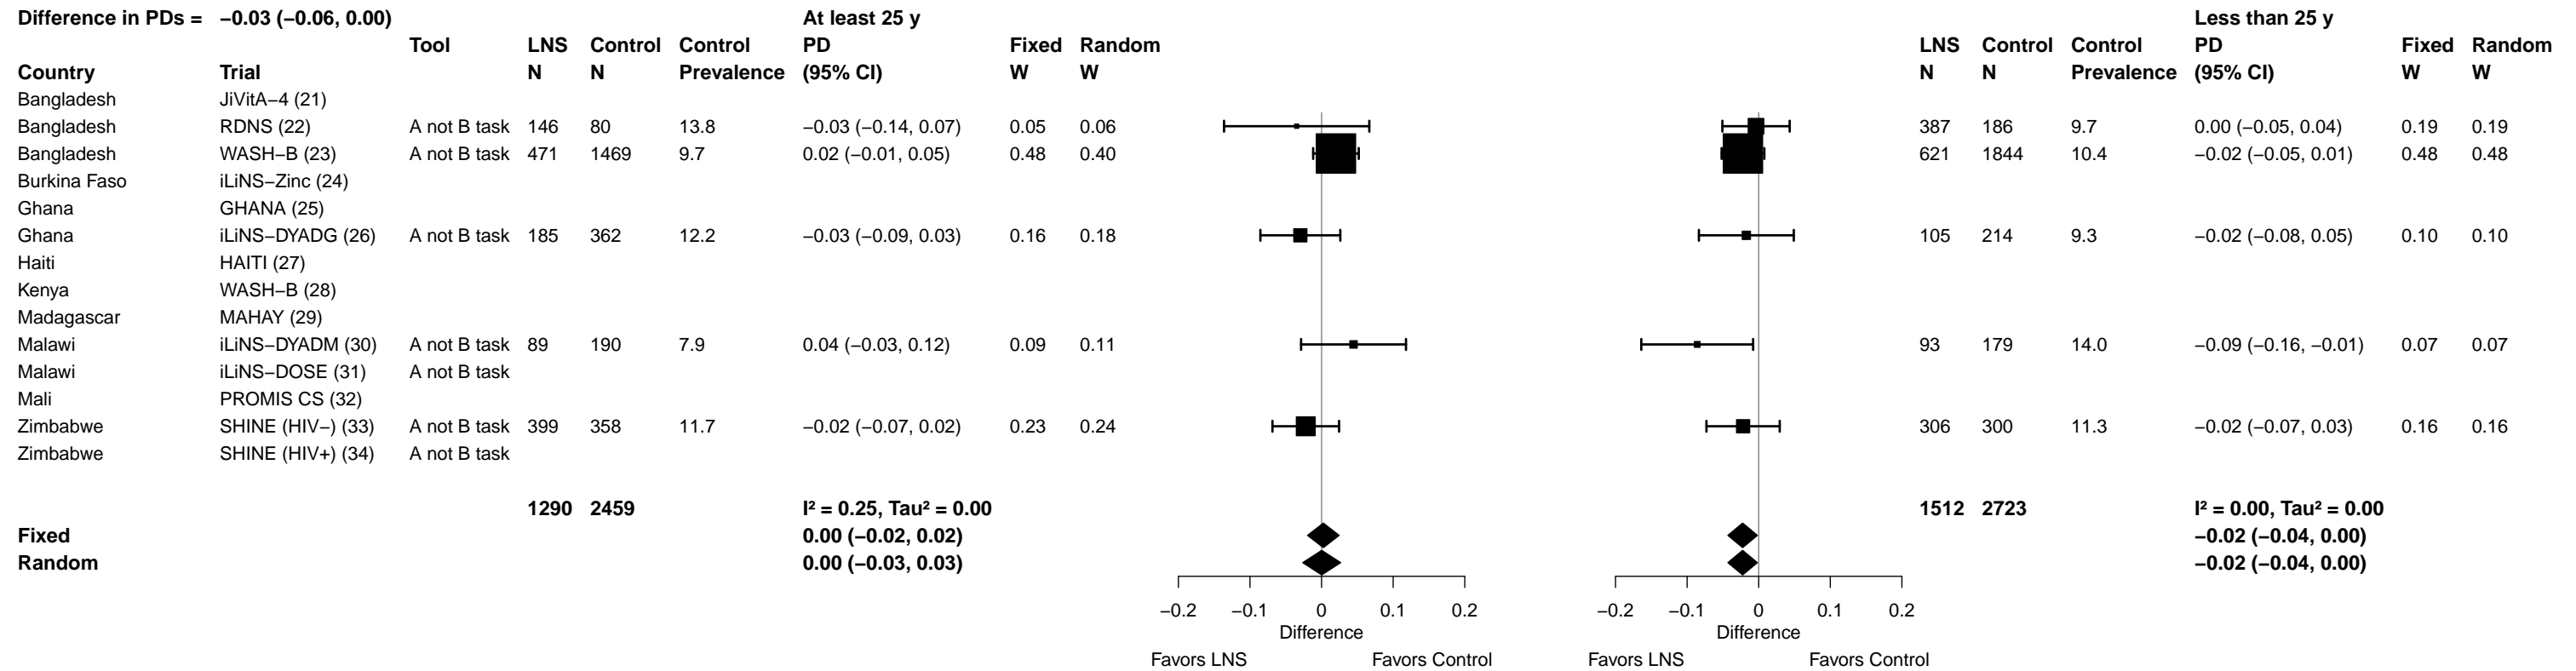

Supplemental figure 5N: Executive function lowest decile prevalence difference

5N4: Stratified by Maternal education

**P-for-interaction = 0.909**  
**Difference in PDs = 0.00 (-0.04, 0.04)**

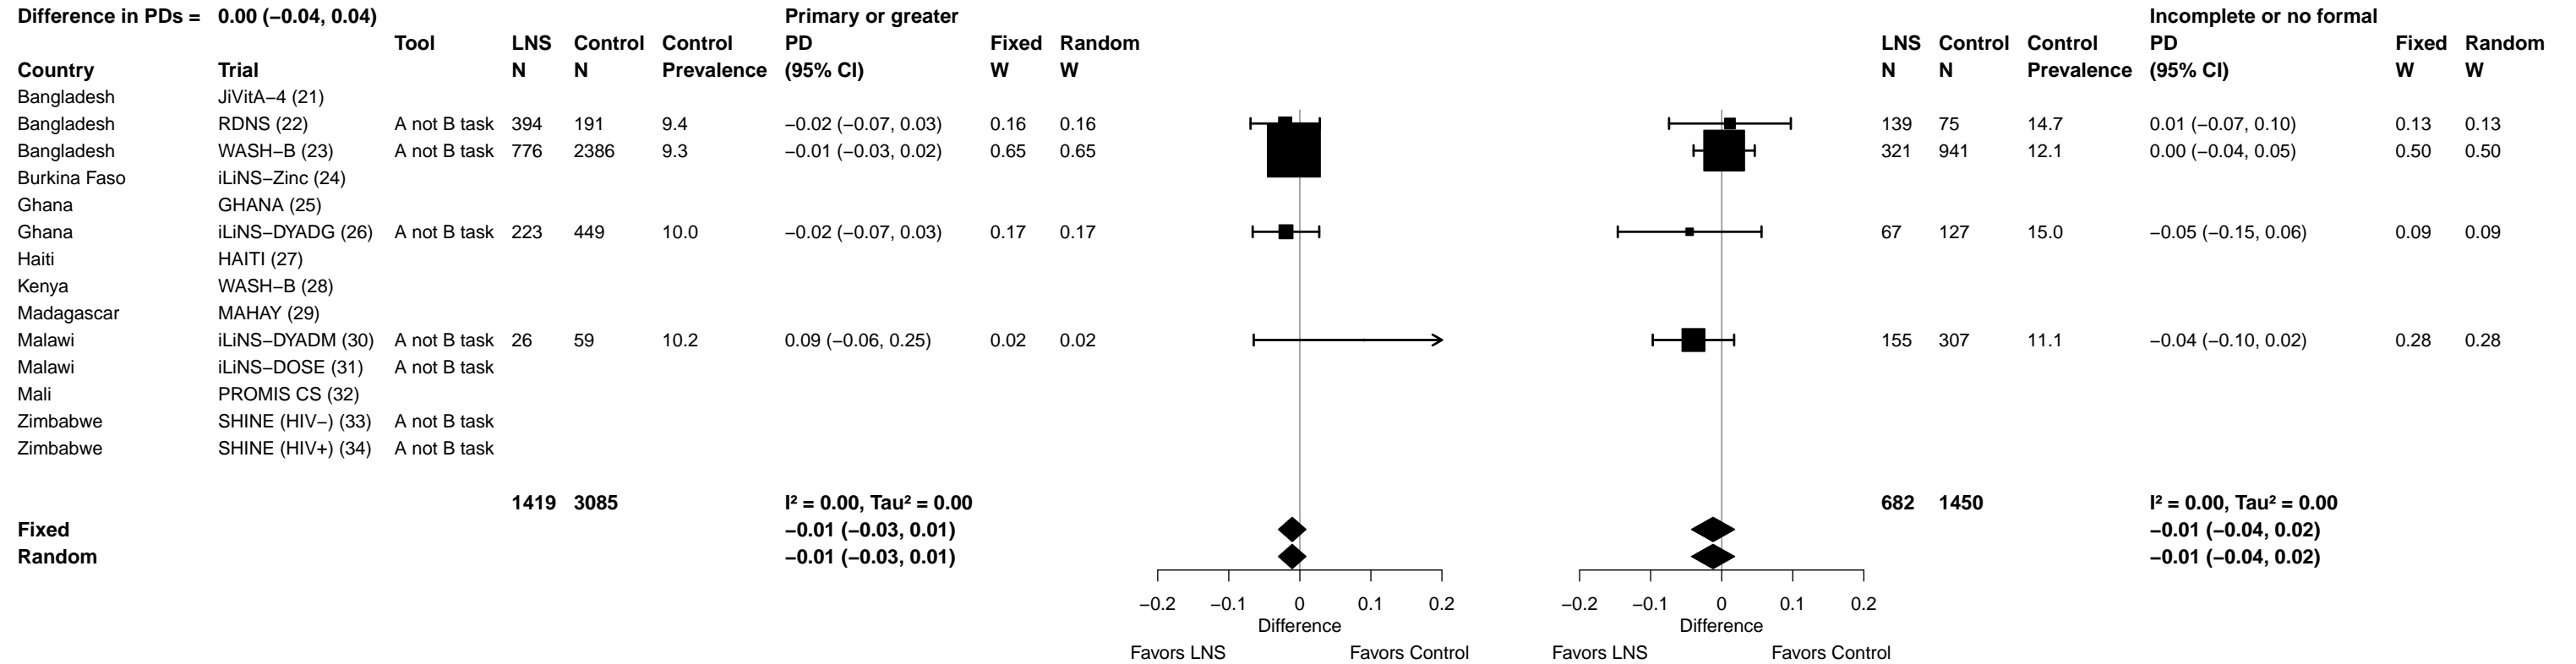

Supplemental figure 5N: Executive function lowest decile prevalence difference

5N5: Stratified by Maternal depressive symptoms

$I^2$ -for-interaction = 0.401

Difference in PDs = 0.02 (-0.02, 0.06)

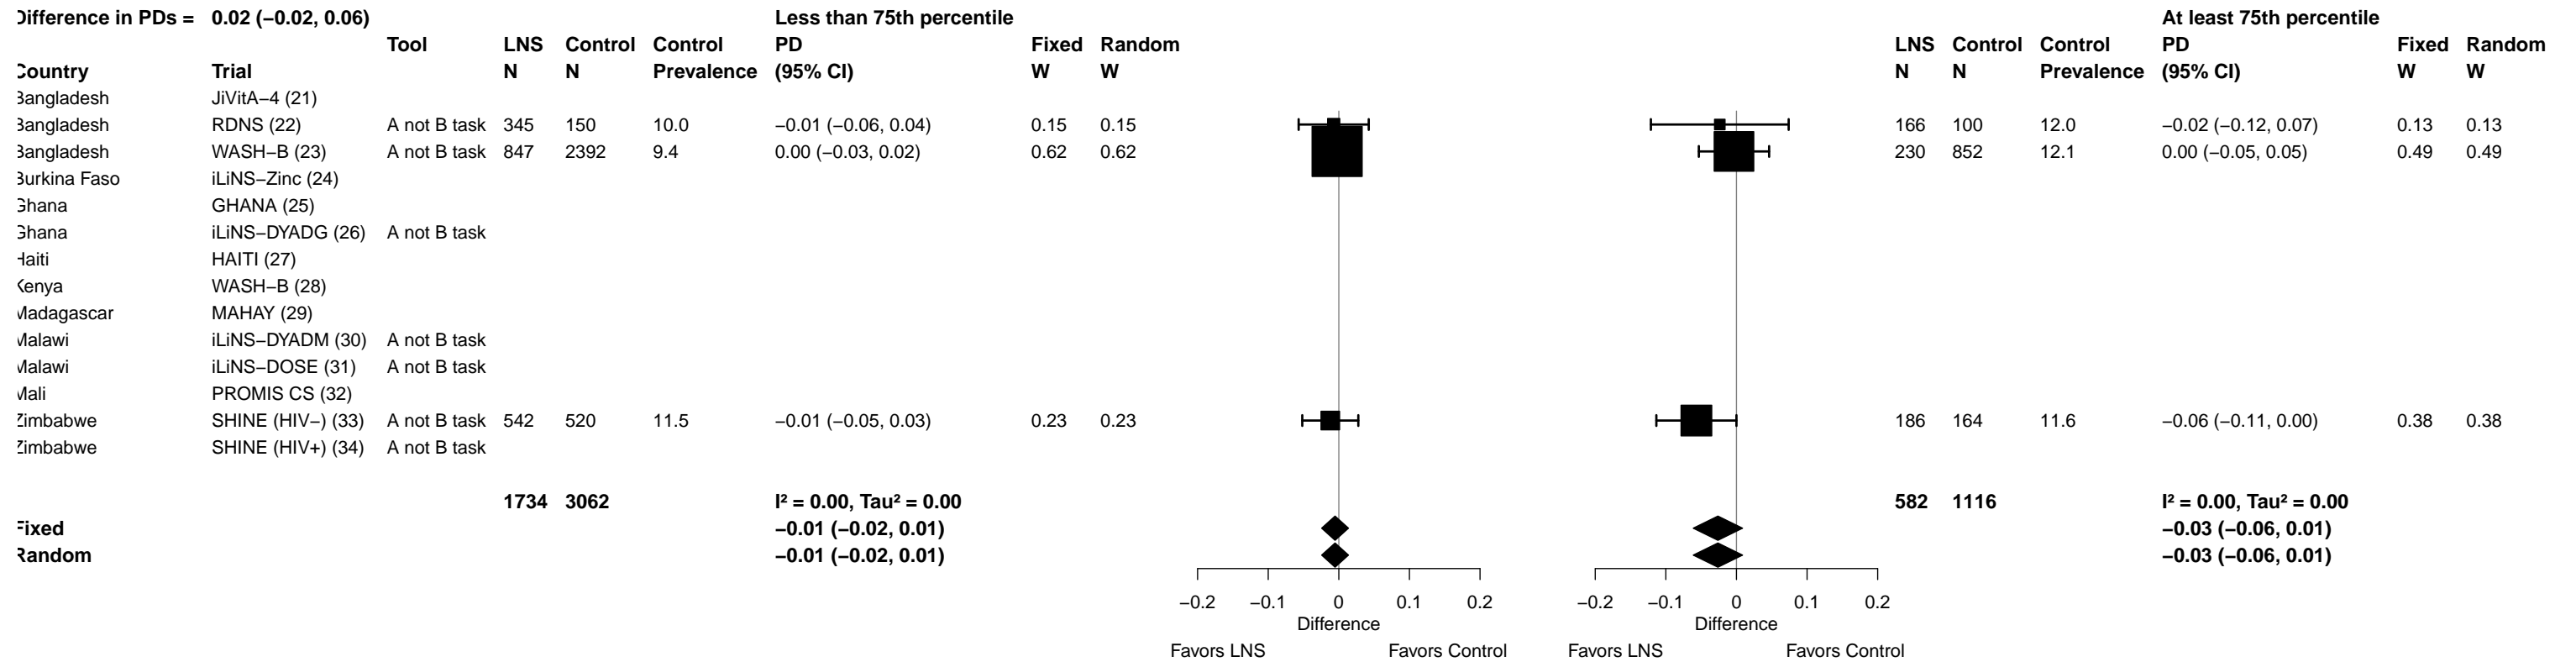



Supplemental figure 5N: Executive function lowest decile prevalence difference

5N6: Stratified by Child sex

**P-for-interaction = 0.267**  
**Difference in PDs = 0.02 (-0.01, 0.04)**

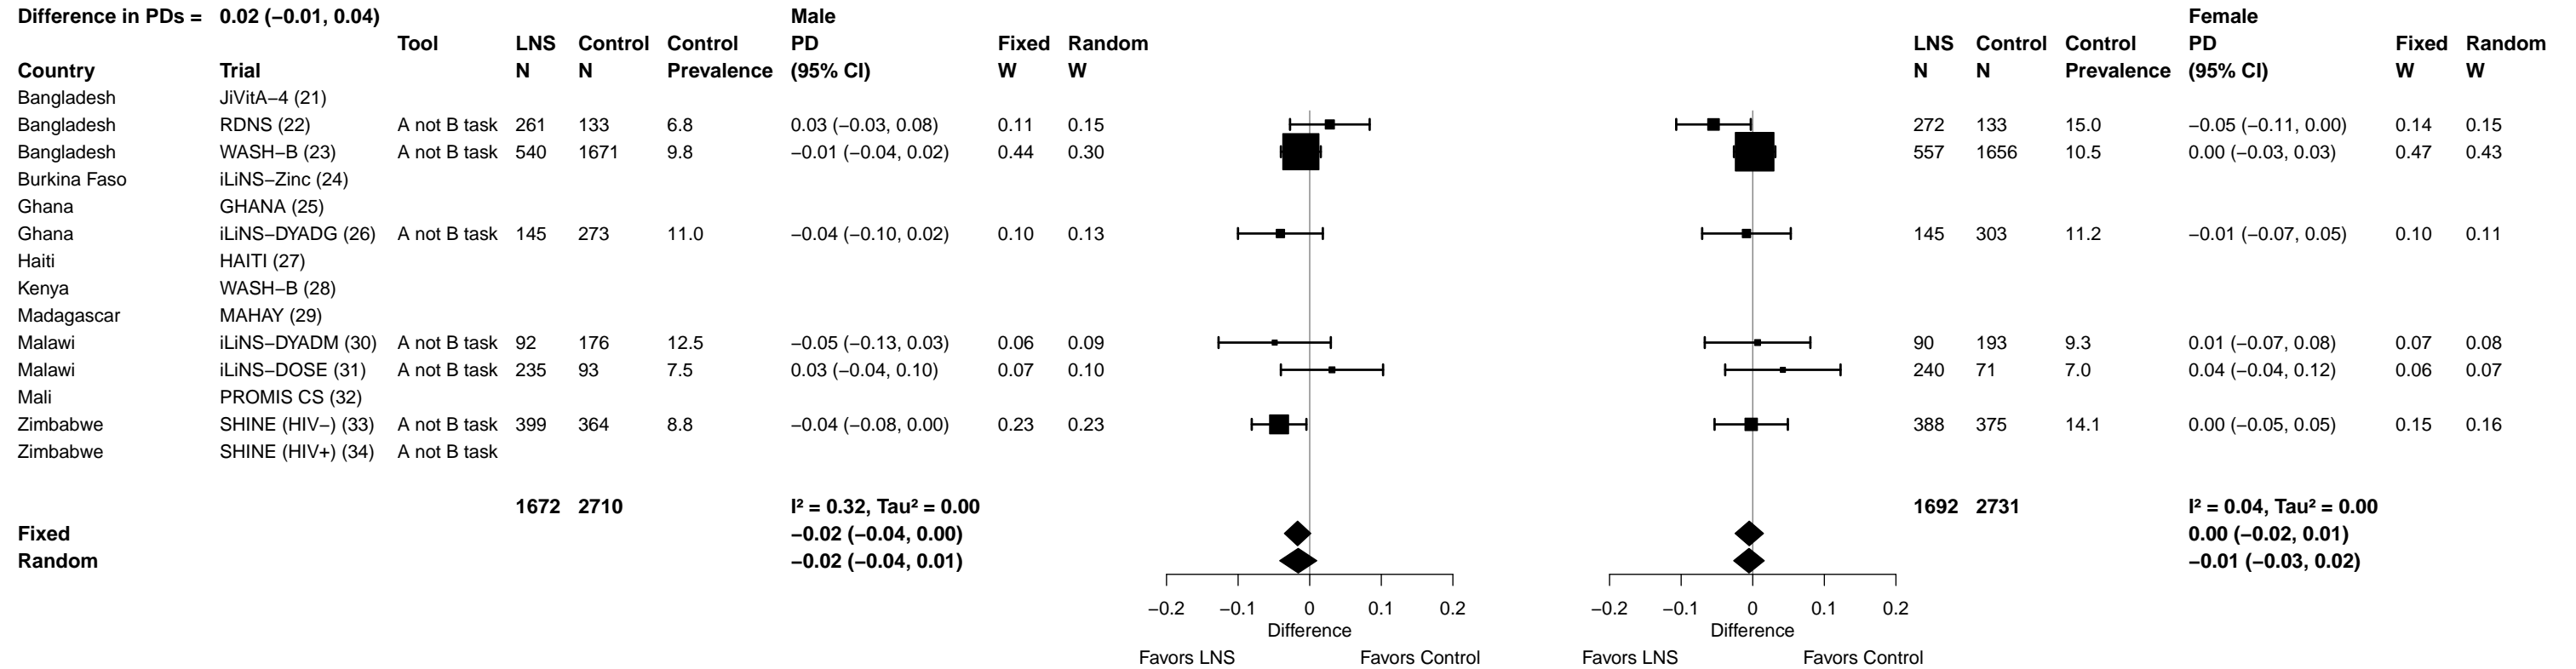

Supplemental figure 5N: Executive function lowest decile prevalence difference

5N7: Stratified by Child birth order

P-for-interaction = 0.116

Difference in PDs = -0.02 (-0.06, 0.01)

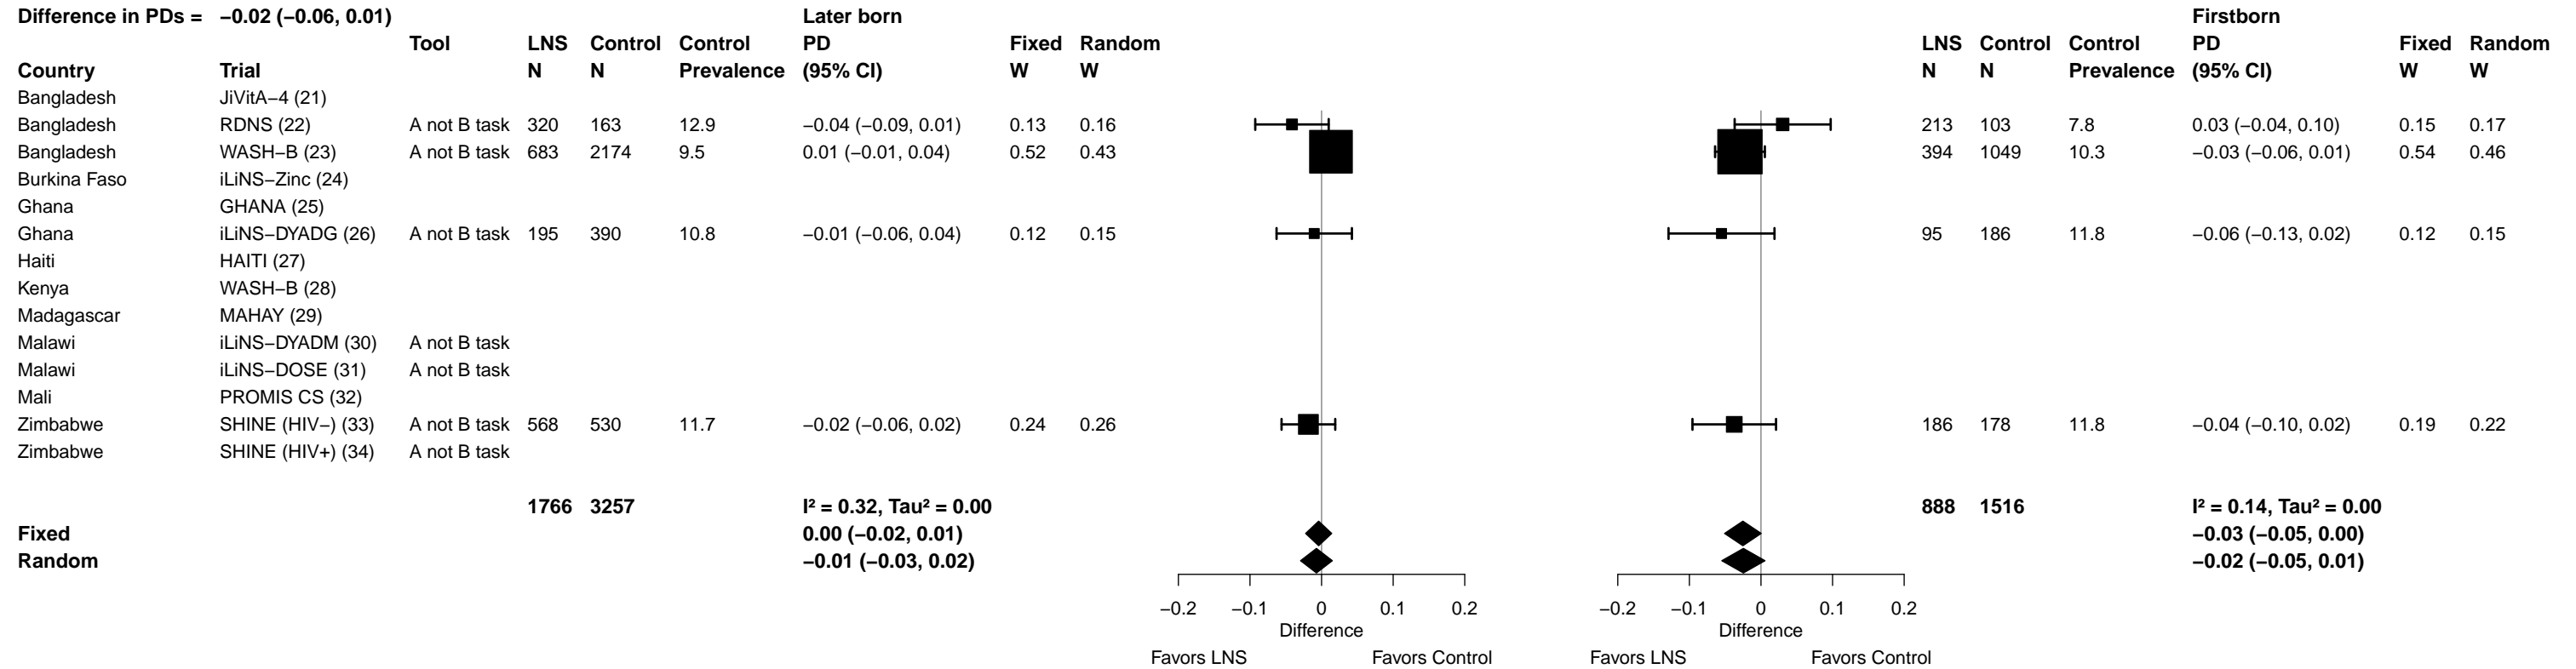

Supplemental figure 5N: Executive function lowest decile prevalence difference

5N8: Stratified by Child baseline stunting

**P-for-interaction = 0.577**  
**Difference in PDs = 0.02 (-0.04, 0.08)**

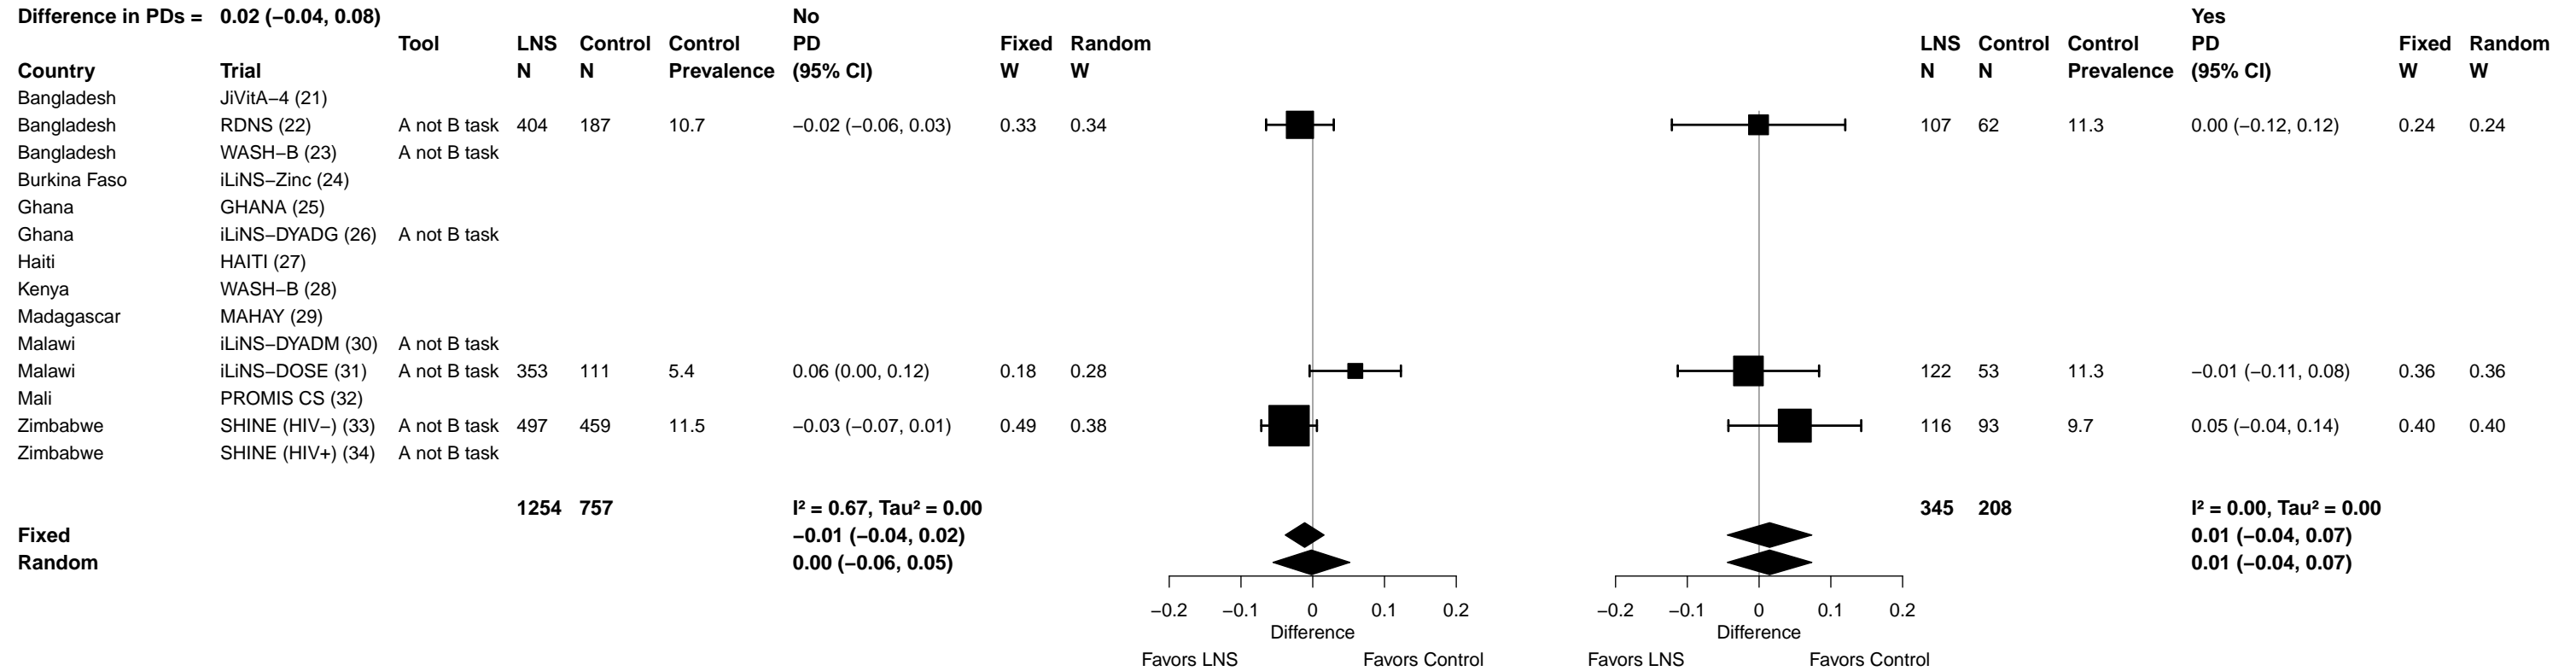

**Supplemental figure 5N: Executive function lowest decile prevalence difference**

**5N9: Stratified by Child baseline acute malnutrition (insufficient comparisons)**

Supplemental figure 5N: Executive function lowest decile prevalence difference

5N10: Stratified by Child baseline anemia

P-for-interaction = 0.432

Difference in PDs = -0.02 (-0.07, 0.03)

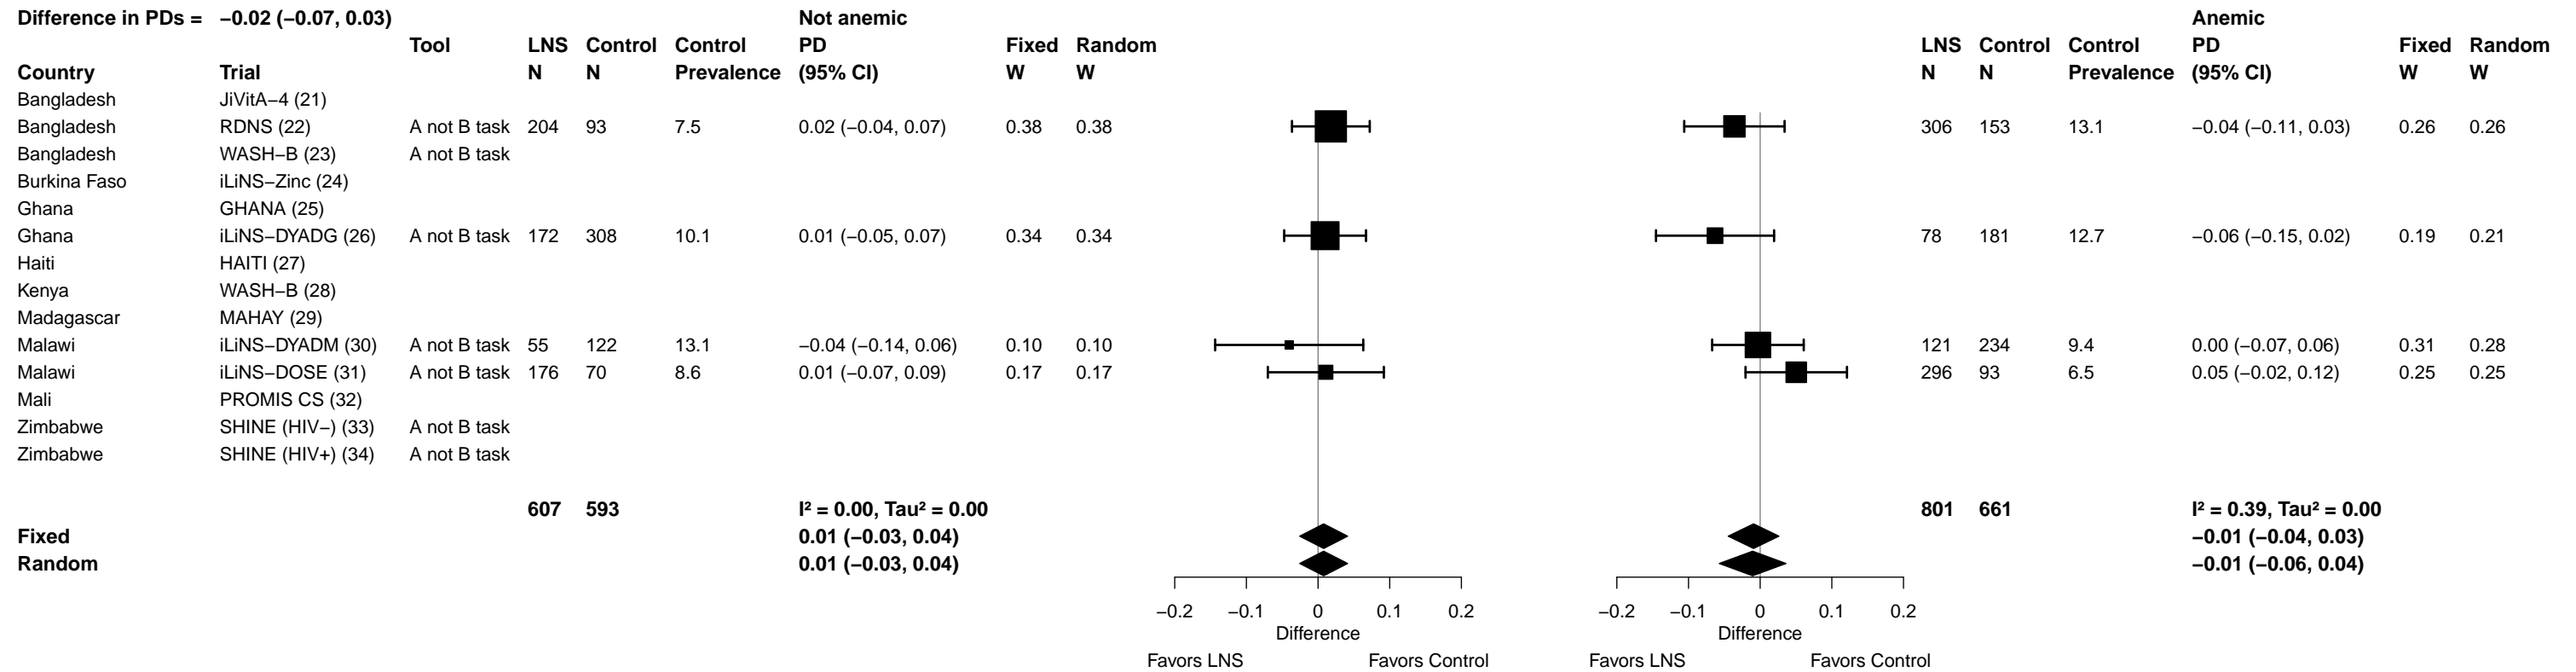

### Supplemental figure 5O: 12-mo walking without support prevalence ratio

#### 5O1: Stratified by Maternal height

P-for-interaction = 0.624

Ratio of PRs = 0.96 (0.79, 1.15)

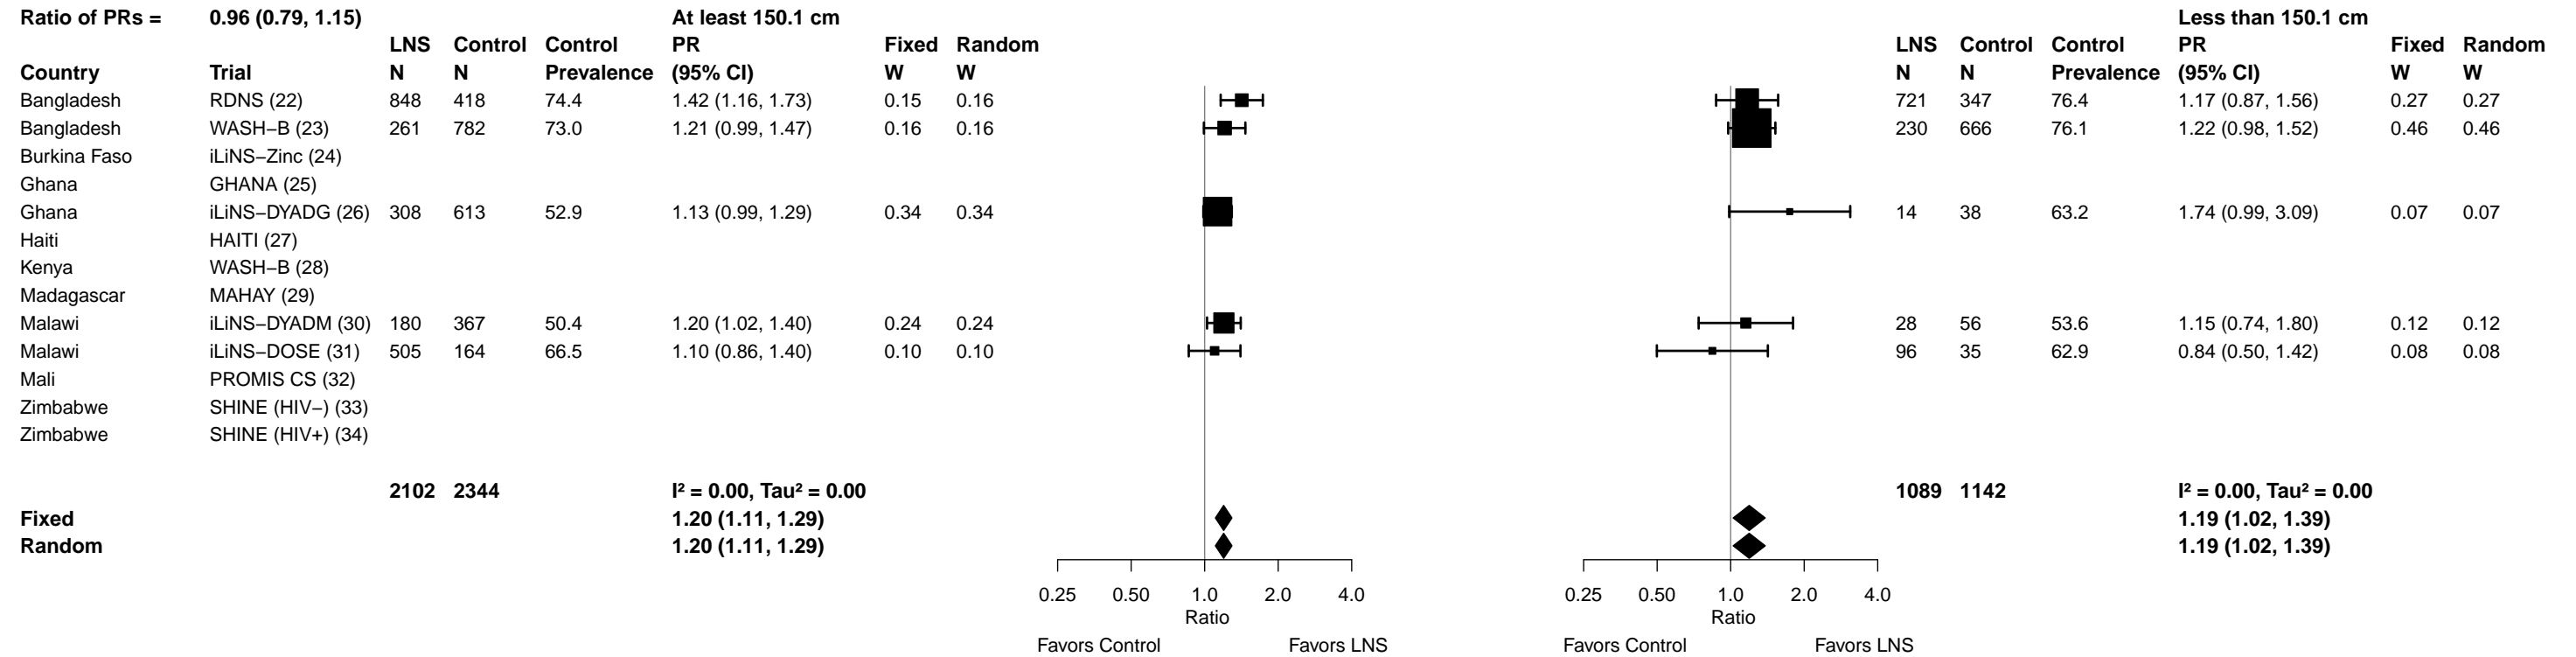

Supplemental figure 5O: 12-mo walking without support prevalence ratio

5O2: Stratified by Maternal BMI

P-for-interaction = 0.343  
 Ratio of PRs = 0.94 (0.82, 1.07)

| Country       | Trial             | LNS<br>N    | Control<br>N | Control<br>Prevalence | At least 20 kg/m <sup>2</sup>                       |                | Fixed<br>W | Random<br>W |  | Less than 20 kg/m <sup>2</sup> |             | Fixed<br>W | Random<br>W                                         |      |      |
|---------------|-------------------|-------------|--------------|-----------------------|-----------------------------------------------------|----------------|------------|-------------|--|--------------------------------|-------------|------------|-----------------------------------------------------|------|------|
|               |                   |             |              |                       | PR<br>(95% CI)                                      | PR<br>(95% CI) |            |             |  |                                |             |            |                                                     |      |      |
| Bangladesh    | RDNS (22)         | 708         | 327          | 74.6                  | 1.57 (1.20, 2.05)                                   | 0.08           | 0.13       |             |  | 861                            | 438         | 75.8       | 1.08 (0.88, 1.32)                                   | 0.27 | 0.27 |
| Bangladesh    | WASH-B (23)       | 225         | 637          | 73.0                  | 1.30 (1.06, 1.60)                                   | 0.13           | 0.15       |             |  | 266                            | 810         | 75.7       | 1.13 (0.91, 1.39)                                   | 0.25 | 0.25 |
| Burkina Faso  | iLiNS-Zinc (24)   |             |              |                       |                                                     |                |            |             |  |                                |             |            |                                                     |      |      |
| Ghana         | GHANA (25)        |             |              |                       |                                                     |                |            |             |  |                                |             |            |                                                     |      |      |
| Ghana         | iLiNS-DYADG (26)  | 284         | 535          | 52.3                  | 1.15 (1.00, 1.32)                                   | 0.29           | 0.18       |             |  | 38                             | 116         | 58.6       | 1.08 (0.71, 1.64)                                   | 0.06 | 0.06 |
| Haiti         | HAITI (27)        |             |              |                       |                                                     |                |            |             |  |                                |             |            |                                                     |      |      |
| Kenya         | WASH-B (28)       | 334         | 1210         | 58.8                  | 0.92 (0.79, 1.07)                                   | 0.25           | 0.17       |             |  | 96                             | 364         | 61.5       | 1.03 (0.77, 1.38)                                   | 0.13 | 0.13 |
| Madagascar    | MAHAY (29)        |             |              |                       |                                                     |                |            |             |  |                                |             |            |                                                     |      |      |
| Malawi        | iLiNS-DYADM (30)  | 121         | 255          | 51.4                  | 1.17 (0.96, 1.43)                                   | 0.14           | 0.16       |             |  | 86                             | 168         | 50.0       | 1.23 (0.98, 1.54)                                   | 0.22 | 0.22 |
| Malawi        | iLiNS-DOSE (31)   | 451         | 138          | 63.0                  | 1.00 (0.78, 1.28)                                   | 0.09           | 0.14       |             |  | 148                            | 60          | 71.7       | 1.19 (0.75, 1.89)                                   | 0.05 | 0.05 |
| Mali          | PROMIS CS (32)    | 83          | 98           | 66.3                  | 0.68 (0.41, 1.14)                                   | 0.02           | 0.07       |             |  | 34                             | 52          | 67.3       | 0.81 (0.41, 1.60)                                   | 0.02 | 0.02 |
| Zimbabwe      | SHINE (HIV-) (33) |             |              |                       |                                                     |                |            |             |  |                                |             |            |                                                     |      |      |
| Zimbabwe      | SHINE (HIV+) (34) |             |              |                       |                                                     |                |            |             |  |                                |             |            |                                                     |      |      |
|               |                   | <b>2206</b> | <b>3200</b>  |                       |                                                     |                |            |             |  | <b>1529</b>                    | <b>2008</b> |            |                                                     |      |      |
| <b>Fixed</b>  |                   |             |              |                       | <b>I<sup>2</sup> = 0.69, Tau<sup>2</sup> = 0.04</b> |                |            |             |  |                                |             |            | <b>I<sup>2</sup> = 0.00, Tau<sup>2</sup> = 0.00</b> |      |      |
| <b>Random</b> |                   |             |              |                       | <b>1.11 (1.03, 1.20)</b>                            |                |            |             |  |                                |             |            | <b>1.11 (1.00, 1.24)</b>                            |      |      |
|               |                   |             |              |                       | <b>1.11 (0.94, 1.32)</b>                            |                |            |             |  |                                |             |            | <b>1.11 (1.00, 1.24)</b>                            |      |      |

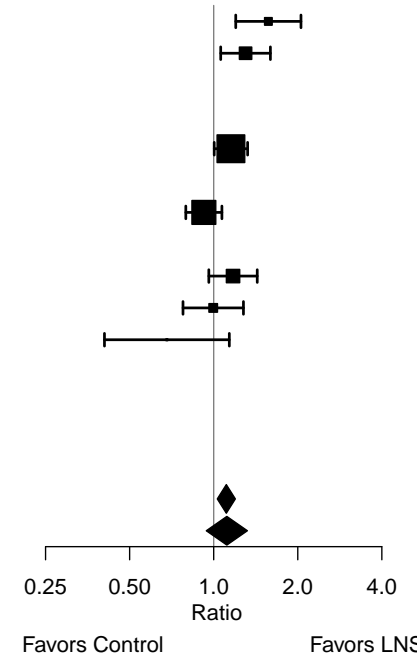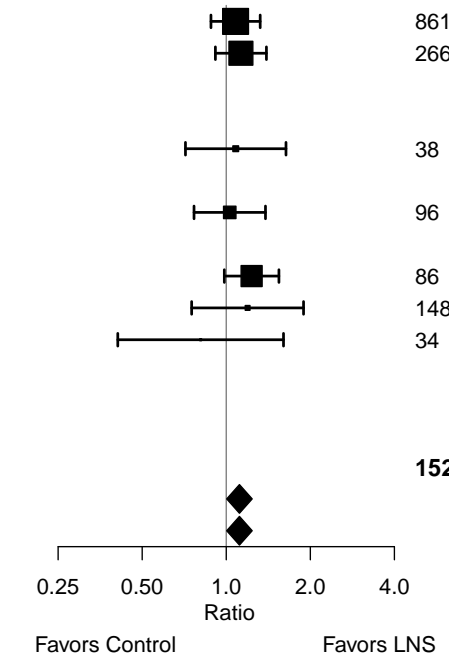

Supplemental figure 5O: 12-mo walking without support prevalence ratio

5O3: Stratified by Maternal age

P-for-interaction = 0.394  
 Ratio of PRs = 1.04 (0.95, 1.13)

| Country      | Trial             | LNS<br>N | Control<br>N | Control<br>Prevalence | At least 25 y     |                | Fixed<br>W | Random<br>W |  | Less than 25 y |              | Fixed<br>W | Random<br>W       |                       |                |
|--------------|-------------------|----------|--------------|-----------------------|-------------------|----------------|------------|-------------|--|----------------|--------------|------------|-------------------|-----------------------|----------------|
|              |                   |          |              |                       | PR<br>(95% CI)    | PR<br>(95% CI) |            |             |  | LNS<br>N       | Control<br>N |            |                   | Control<br>Prevalence | PR<br>(95% CI) |
| Bangladesh   | RDNS (22)         | 447      | 217          | 76.0                  | 1.37 (1.07, 1.76) | 0.11           | 0.13       |             |  | 1181           | 573          | 73.8       | 1.25 (1.02, 1.53) | 0.16                  | 0.16           |
| Bangladesh   | WASH-B (23)       | 223      | 676          | 74.6                  | 0.95 (0.74, 1.22) | 0.11           | 0.13       |             |  | 274            | 791          | 74.6       | 1.41 (1.18, 1.67) | 0.22                  | 0.18           |
| Burkina Faso | iLiNS-Zinc (24)   |          |              |                       |                   |                |            |             |  |                |              |            |                   |                       |                |
| Ghana        | GHANA (25)        |          |              |                       |                   |                |            |             |  |                |              |            |                   |                       |                |
| Ghana        | iLiNS-DYADG (26)  | 209      | 405          | 53.8                  | 1.08 (0.91, 1.28) | 0.24           | 0.18       |             |  | 118            | 258          | 51.9       | 1.27 (1.05, 1.54) | 0.18                  | 0.16           |
| Haiti        | HAITI (27)        | 60       | 57           | 68.4                  | 1.58 (1.00, 2.50) | 0.03           | 0.06       |             |  | 22             | 22           | 50.0       | 0.73 (0.36, 1.45) | 0.01                  | 0.03           |
| Kenya        | WASH-B (28)       | 243      | 914          | 61.3                  | 1.03 (0.87, 1.22) | 0.24           | 0.18       |             |  | 197            | 679          | 57.7       | 0.91 (0.76, 1.10) | 0.20                  | 0.17           |
| Madagascar   | MAHAY (29)        |          |              |                       |                   |                |            |             |  |                |              |            |                   |                       |                |
| Malawi       | iLiNS-DYADM (30)  | 100      | 213          | 47.9                  | 1.06 (0.85, 1.31) | 0.15           | 0.15       |             |  | 108            | 213          | 54.5       | 1.36 (1.11, 1.68) | 0.15                  | 0.16           |
| Malawi       | iLiNS-DOSE (31)   | 327      | 111          | 64.9                  | 1.11 (0.83, 1.47) | 0.09           | 0.12       |             |  | 264            | 83           | 67.5       | 0.99 (0.69, 1.41) | 0.05                  | 0.09           |
| Mali         | PROMIS CS (32)    | 59       | 71           | 62.0                  | 0.58 (0.32, 1.06) | 0.02           | 0.04       |             |  | 59             | 80           | 70.0       | 0.85 (0.49, 1.45) | 0.02                  | 0.05           |
| Zimbabwe     | SHINE (HIV-) (33) |          |              |                       |                   |                |            |             |  |                |              |            |                   |                       |                |
| Zimbabwe     | SHINE (HIV+) (34) |          |              |                       |                   |                |            |             |  |                |              |            |                   |                       |                |

Fixed  
 Random  
 I<sup>2</sup> = 0.32, Tau<sup>2</sup> = 0.02  
 1.07 (1.00, 1.14)  
 1.08 (0.96, 1.21)

Fixed  
 Random  
 I<sup>2</sup> = 0.65, Tau<sup>2</sup> = 0.02  
 1.12 (1.05, 1.18)  
 1.14 (1.01, 1.29)

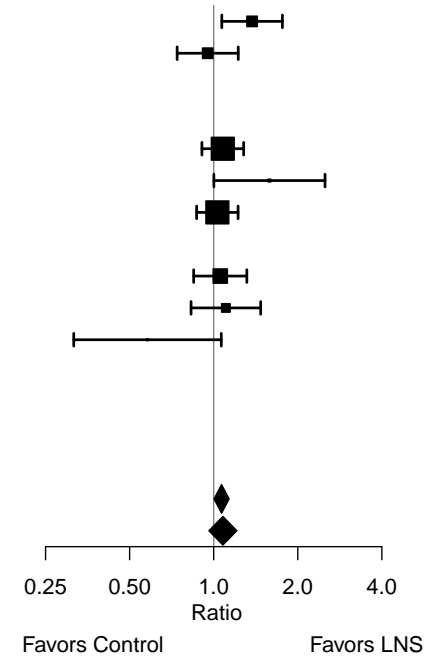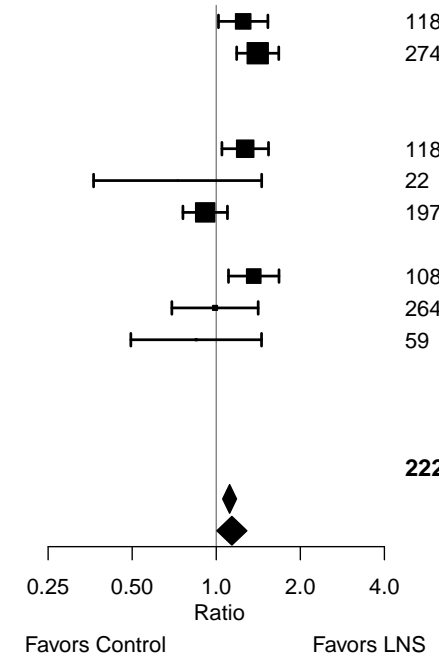



Supplemental figure 5O: 12-mo walking without support prevalence ratio

5O4: Stratified by Maternal education

P-for-interaction = 0.792  
 Ratio of PRs = 0.99 (0.91, 1.08)

| Country       | Trial             | LNS<br>N    | Control<br>N | Control<br>Prevalence | Primary or greater<br>PR<br>(95% CI)                | Fixed<br>W | Random<br>W |  | LNS<br>N    | Control<br>N | Control<br>Prevalence | Incomplete or no formal<br>PR<br>(95% CI)           | Fixed<br>W | Random<br>W |
|---------------|-------------------|-------------|--------------|-----------------------|-----------------------------------------------------|------------|-------------|--|-------------|--------------|-----------------------|-----------------------------------------------------|------------|-------------|
|               |                   |             |              |                       |                                                     |            |             |  |             |              |                       |                                                     |            |             |
| Bangladesh    | RDNS (22)         | 1219        | 574          | 73.9                  | 1.32 (1.08, 1.62)                                   | 0.15       | 0.17        |  | 409         | 216          | 75.9                  | 1.14 (0.91, 1.42)                                   | 0.17       | 0.17        |
| Bangladesh    | WASH-B (23)       | 337         | 1048         | 72.7                  | 1.28 (1.11, 1.49)                                   | 0.28       | 0.26        |  | 160         | 426          | 79.1                  | 1.02 (0.76, 1.37)                                   | 0.10       | 0.10        |
| Burkina Faso  | iLiNS-Zinc (24)   |             |              |                       |                                                     |            |             |  |             |              |                       |                                                     |            |             |
| Ghana         | GHANA (25)        |             |              |                       |                                                     |            |             |  |             |              |                       |                                                     |            |             |
| Ghana         | iLiNS-DYADG (26)  | 257         | 524          | 51.5                  | 1.12 (0.97, 1.30)                                   | 0.30       | 0.27        |  | 70          | 139          | 59.0                  | 1.25 (0.93, 1.70)                                   | 0.09       | 0.10        |
| Haiti         | HAITI (27)        |             |              |                       |                                                     |            |             |  |             |              |                       |                                                     |            |             |
| Kenya         | WASH-B (28)       | 217         | 775          | 59.2                  | 1.04 (0.87, 1.24)                                   | 0.19       | 0.20        |  | 229         | 827          | 60.3                  | 0.89 (0.72, 1.10)                                   | 0.20       | 0.20        |
| Madagascar    | MAHAY (29)        |             |              |                       |                                                     |            |             |  |             |              |                       |                                                     |            |             |
| Malawi        | iLiNS-DYADM (30)  | 32          | 64           | 42.2                  | 0.97 (0.67, 1.41)                                   | 0.04       | 0.06        |  | 175         | 359          | 52.4                  | 1.24 (1.05, 1.46)                                   | 0.32       | 0.29        |
| Malawi        | iLiNS-DOSE (31)   | 129         | 42           | 61.9                  | 1.08 (0.70, 1.67)                                   | 0.03       | 0.05        |  | 462         | 152          | 67.1                  | 1.05 (0.81, 1.36)                                   | 0.13       | 0.13        |
| Mali          | PROMIS CS (32)    |             |              |                       |                                                     |            |             |  |             |              |                       |                                                     |            |             |
| Zimbabwe      | SHINE (HIV-) (33) |             |              |                       |                                                     |            |             |  |             |              |                       |                                                     |            |             |
| Zimbabwe      | SHINE (HIV+) (34) |             |              |                       |                                                     |            |             |  |             |              |                       |                                                     |            |             |
|               |                   | <b>2191</b> | <b>3027</b>  |                       |                                                     |            |             |  | <b>1505</b> | <b>2119</b>  |                       |                                                     |            |             |
| <b>Fixed</b>  |                   |             |              |                       | <b>I<sup>2</sup> = 0.44, Tau<sup>2</sup> = 0.00</b> |            |             |  |             |              |                       | <b>I<sup>2</sup> = 0.16, Tau<sup>2</sup> = 0.00</b> |            |             |
| <b>Random</b> |                   |             |              |                       | <b>1.10 (1.04, 1.16)</b>                            |            |             |  |             |              |                       | <b>1.09 (1.02, 1.16)</b>                            |            |             |
|               |                   |             |              |                       | <b>1.12 (1.04, 1.21)</b>                            |            |             |  |             |              |                       | <b>1.09 (1.00, 1.18)</b>                            |            |             |

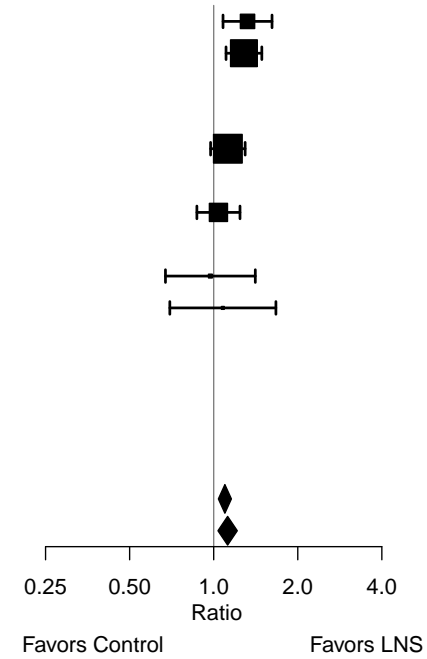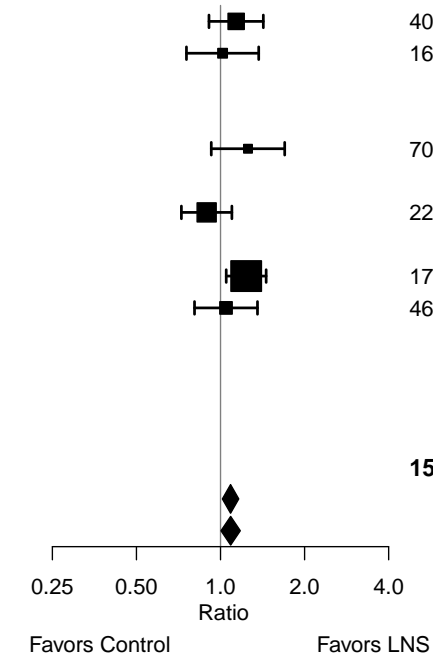

Supplemental figure 5O: 12-mo walking without support prevalence ratio

5O5: Stratified by Maternal depressive symptoms

**P-for-interaction = 0.543**  
**Ratio of PRs = 0.95 (0.81, 1.12)**

| Country       | Trial             | LNS<br>N    | Control<br>N | Control<br>Prevalence | Less than 75th percentile                           |            |             |
|---------------|-------------------|-------------|--------------|-----------------------|-----------------------------------------------------|------------|-------------|
|               |                   |             |              |                       | PR<br>(95% CI)                                      | Fixed<br>W | Random<br>W |
| Bangladesh    | RDNS (22)         | 1058        | 460          | 70.9                  | 1.11 (0.89, 1.38)                                   | 0.11       | 0.13        |
| Bangladesh    | WASH-B (23)       | 389         | 1075         | 73.4                  | 1.28 (1.08, 1.50)                                   | 0.20       | 0.21        |
| Burkina Faso  | iLiNS-Zinc (24)   |             |              |                       |                                                     |            |             |
| Ghana         | GHANA (25)        |             |              |                       |                                                     |            |             |
| Ghana         | iLiNS-DYADG (26)  | 242         | 446          | 52.9                  | 1.16 (1.00, 1.35)                                   | 0.24       | 0.23        |
| Haiti         | HAITI (27)        |             |              |                       |                                                     |            |             |
| Kenya         | WASH-B (28)       | 314         | 1098         | 59.6                  | 0.98 (0.85, 1.14)                                   | 0.25       | 0.23        |
| Madagascar    | MAHAY (29)        |             |              |                       |                                                     |            |             |
| Malawi        | iLiNS-DYADM (30)  | 149         | 293          | 48.1                  | 1.20 (1.02, 1.42)                                   | 0.20       | 0.20        |
| Malawi        | iLiNS-DOSE (31)   |             |              |                       |                                                     |            |             |
| Mali          | PROMIS CS (32)    |             |              |                       |                                                     |            |             |
| Zimbabwe      | SHINE (HIV-) (33) |             |              |                       |                                                     |            |             |
| Zimbabwe      | SHINE (HIV+) (34) |             |              |                       |                                                     |            |             |
|               |                   | <b>2152</b> | <b>3372</b>  |                       |                                                     |            |             |
| <b>Fixed</b>  |                   |             |              |                       | <b>I<sup>2</sup> = 0.34, Tau<sup>2</sup> = 0.00</b> |            |             |
| <b>Random</b> |                   |             |              |                       | <b>1.14 (1.06, 1.23)</b>                            |            |             |
|               |                   |             |              |                       | <b>1.14 (1.04, 1.25)</b>                            |            |             |

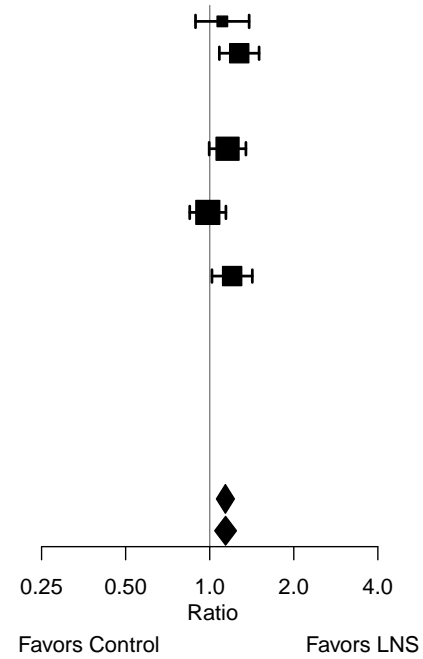

| Country       | Trial             | LNS<br>N   | Control<br>N | Control<br>Prevalence | At least 75th percentile                            |            |             |
|---------------|-------------------|------------|--------------|-----------------------|-----------------------------------------------------|------------|-------------|
|               |                   |            |              |                       | PR<br>(95% CI)                                      | Fixed<br>W | Random<br>W |
| Bangladesh    | RDNS (22)         | 508        | 279          | 79.6                  | 1.67 (1.26, 2.21)                                   | 0.24       | 0.22        |
| Bangladesh    | WASH-B (23)       | 108        | 399          | 77.7                  | 0.83 (0.53, 1.29)                                   | 0.10       | 0.15        |
| Burkina Faso  | iLiNS-Zinc (24)   |            |              |                       |                                                     |            |             |
| Ghana         | GHANA (25)        |            |              |                       |                                                     |            |             |
| Ghana         | iLiNS-DYADG (26)  | 75         | 198          | 55.1                  | 1.16 (0.89, 1.51)                                   | 0.27       | 0.23        |
| Haiti         | HAITI (27)        |            |              |                       |                                                     |            |             |
| Kenya         | WASH-B (28)       | 99         | 373          | 61.1                  | 1.01 (0.77, 1.33)                                   | 0.25       | 0.23        |
| Madagascar    | MAHAY (29)        |            |              |                       |                                                     |            |             |
| Malawi        | iLiNS-DYADM (30)  | 47         | 108          | 60.2                  | 1.23 (0.85, 1.78)                                   | 0.14       | 0.17        |
| Malawi        | iLiNS-DOSE (31)   |            |              |                       |                                                     |            |             |
| Mali          | PROMIS CS (32)    |            |              |                       |                                                     |            |             |
| Zimbabwe      | SHINE (HIV-) (33) |            |              |                       |                                                     |            |             |
| Zimbabwe      | SHINE (HIV+) (34) |            |              |                       |                                                     |            |             |
|               |                   | <b>837</b> | <b>1357</b>  |                       |                                                     |            |             |
| <b>Fixed</b>  |                   |            |              |                       | <b>I<sup>2</sup> = 0.57, Tau<sup>2</sup> = 0.04</b> |            |             |
| <b>Random</b> |                   |            |              |                       | <b>1.19 (1.04, 1.37)</b>                            |            |             |
|               |                   |            |              |                       | <b>1.17 (0.94, 1.46)</b>                            |            |             |

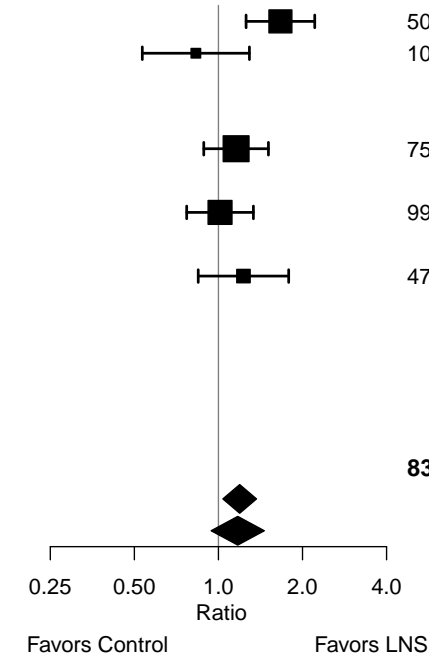

Supplemental figure 5O: 12-mo walking without support prevalence ratio

5O6: Stratified by Child sex

P-for-interaction = 0.952  
 Ratio of PRs = 1.00 (0.92, 1.09)

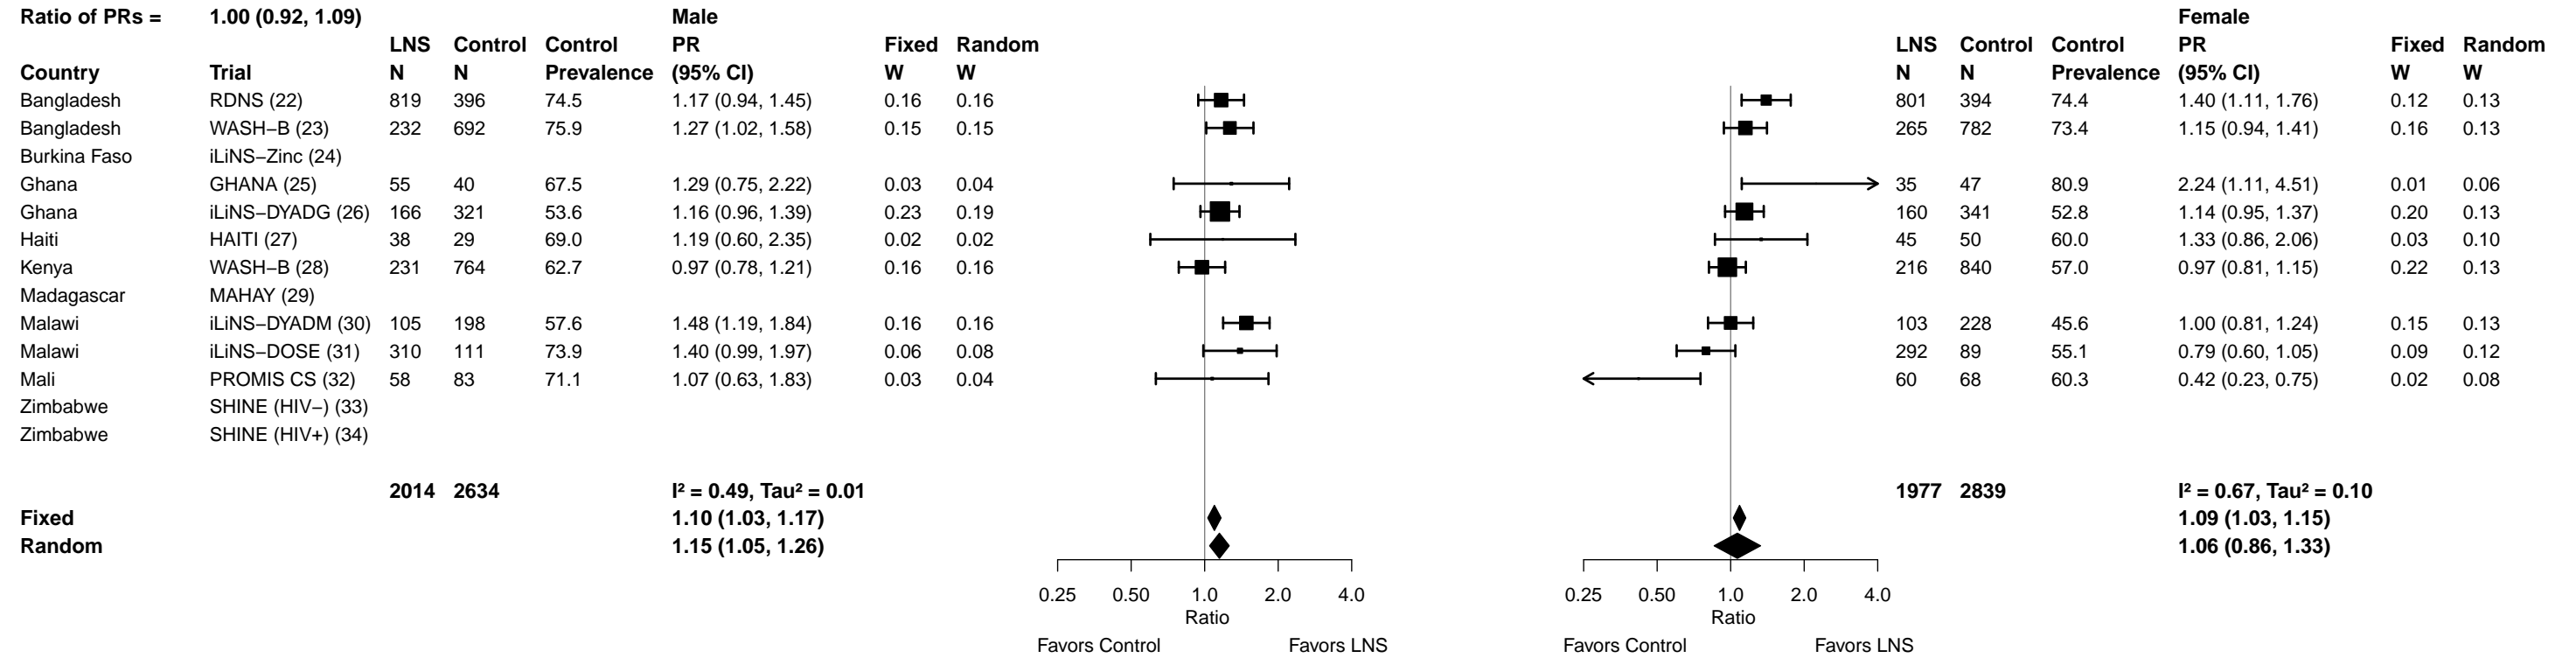

Supplemental figure 5O: 12-mo walking without support prevalence ratio

5O7: Stratified by Child birth order

P-for-interaction = 0.025  
 Ratio of PRs = 0.90 (0.81, 0.99)

| Country      | Trial             | LNS<br>N | Control<br>N | Control<br>Prevalence | Later born<br>PR<br>(95% CI) | Fixed<br>W | Random<br>W |
|--------------|-------------------|----------|--------------|-----------------------|------------------------------|------------|-------------|
|              |                   |          |              |                       |                              |            |             |
| Bangladesh   | RDNS (22)         | 953      | 496          | 75.6                  | 1.38 (1.13, 1.67)            | 0.14       | 0.14        |
| Bangladesh   | WASH-B (23)       | 314      | 944          | 74.8                  | 1.15 (0.94, 1.40)            | 0.13       | 0.14        |
| Burkina Faso | iLiNS-Zinc (24)   |          |              |                       |                              |            |             |
| Ghana        | GHANA (25)        | 54       | 47           | 83.0                  | 2.07 (1.00, 4.28)            | 0.01       | 0.02        |
| Ghana        | iLiNS-DYADG (26)  | 222      | 439          | 54.9                  | 1.21 (1.03, 1.42)            | 0.20       | 0.17        |
| Haiti        | HAITI (27)        | 57       | 50           | 68.0                  | 1.43 (0.87, 2.33)            | 0.02       | 0.04        |
| Kenya        | WASH-B (28)       | 338      | 1296         | 60.2                  | 1.02 (0.88, 1.18)            | 0.23       | 0.17        |
| Madagascar   | MAHAY (29)        |          |              |                       |                              |            |             |
| Malawi       | iLiNS-DYADM (30)  | 166      | 340          | 50.6                  | 1.17 (0.99, 1.39)            | 0.18       | 0.16        |
| Malawi       | iLiNS-DOSE (31)   | 388      | 139          | 67.6                  | 1.20 (0.92, 1.58)            | 0.07       | 0.10        |
| Mali         | PROMIS CS (32)    | 103      | 134          | 65.7                  | 0.65 (0.39, 1.08)            | 0.02       | 0.04        |
| Zimbabwe     | SHINE (HIV-) (33) |          |              |                       |                              |            |             |
| Zimbabwe     | SHINE (HIV+) (34) |          |              |                       |                              |            |             |

2595 3885

$I^2 = 0.37, \text{Tau}^2 = 0.01$   
**1.16 (1.09, 1.23)**  
**1.17 (1.05, 1.30)**

Fixed  
 Random

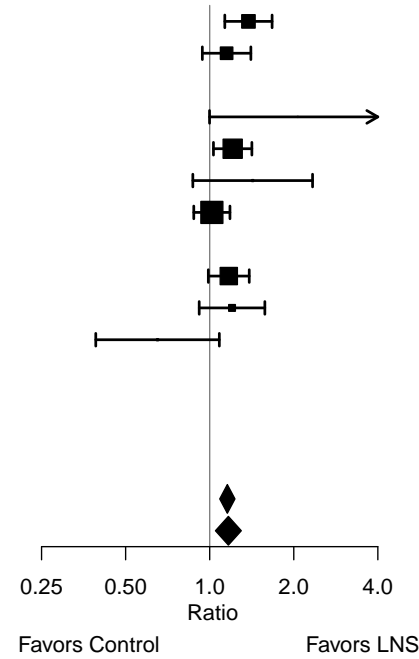

| Country      | Trial             | LNS<br>N | Control<br>N | Control<br>Prevalence | Firstborn<br>PR<br>(95% CI) | Fixed<br>W | Random<br>W |
|--------------|-------------------|----------|--------------|-----------------------|-----------------------------|------------|-------------|
|              |                   |          |              |                       |                             |            |             |
| Bangladesh   | RDNS (22)         | 673      | 294          | 72.4                  | 1.14 (0.90, 1.45)           | 0.20       | 0.17        |
| Bangladesh   | WASH-B (23)       | 157      | 440          | 74.1                  | 1.38 (1.09, 1.74)           | 0.20       | 0.17        |
| Burkina Faso | iLiNS-Zinc (24)   |          |              |                       |                             |            |             |
| Ghana        | GHANA (25)        | 36       | 36           | 69.4                  | 1.73 (0.97, 3.09)           | 0.03       | 0.06        |
| Ghana        | iLiNS-DYADG (26)  | 105      | 224          | 49.6                  | 1.04 (0.83, 1.30)           | 0.22       | 0.18        |
| Haiti        | HAITI (27)        | 26       | 29           | 55.2                  | 1.03 (0.58, 1.84)           | 0.03       | 0.06        |
| Kenya        | WASH-B (28)       | 108      | 306          | 58.2                  | 0.80 (0.60, 1.05)           | 0.15       | 0.15        |
| Madagascar   | MAHAY (29)        |          |              |                       |                             |            |             |
| Malawi       | iLiNS-DYADM (30)  | 42       | 84           | 52.4                  | 1.30 (0.94, 1.80)           | 0.11       | 0.12        |
| Malawi       | iLiNS-DOSE (31)   | 124      | 33           | 57.6                  | 0.72 (0.45, 1.16)           | 0.05       | 0.08        |
| Mali         | PROMIS CS (32)    | 14       | 14           | 64.3                  | 1.00 (0.39, 2.56)           | 0.01       | 0.02        |
| Zimbabwe     | SHINE (HIV-) (33) |          |              |                       |                             |            |             |
| Zimbabwe     | SHINE (HIV+) (34) |          |              |                       |                             |            |             |

1285 1460

$I^2 = 0.46, \text{Tau}^2 = 0.02$   
**1.05 (0.99, 1.11)**  
**1.08 (0.94, 1.24)**

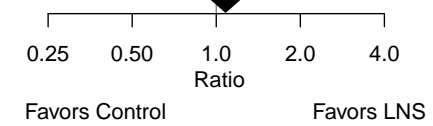

Supplemental figure 5O: 12-mo walking without support prevalence ratio

5O8: Stratified by Child baseline stunting

P-for-interaction = 0.624  
 Ratio of PRs = 1.03 (0.90, 1.18)

| Country       | Trial             | LNS<br>N    | Control<br>N | Control<br>Prevalence | No                                                  |  | Fixed<br>W | Random<br>W |  | Yes            |            | Fixed<br>W | Random<br>W                                         |
|---------------|-------------------|-------------|--------------|-----------------------|-----------------------------------------------------|--|------------|-------------|--|----------------|------------|------------|-----------------------------------------------------|
|               |                   |             |              |                       | PR<br>(95% CI)                                      |  |            |             |  | PR<br>(95% CI) |            |            |                                                     |
| Bangladesh    | RDNS (22)         | 1219        | 559          | 72.1                  | 1.23 (1.02, 1.47)                                   |  | 0.22       | 0.24        |  |                |            |            |                                                     |
| Bangladesh    | WASH-B (23)       |             |              |                       |                                                     |  |            |             |  |                |            |            |                                                     |
| Burkina Faso  | iLiNS-Zinc (24)   |             |              |                       |                                                     |  |            |             |  |                |            |            |                                                     |
| Ghana         | GHANA (25)        |             |              |                       |                                                     |  |            |             |  |                |            |            |                                                     |
| Ghana         | iLiNS-DYADG (26)  | 277         | 557          | 52.1                  | 1.14 (1.00, 1.31)                                   |  | 0.37       | 0.32        |  |                |            |            |                                                     |
| Haiti         | HAITI (27)        |             |              |                       |                                                     |  |            |             |  |                |            |            |                                                     |
| Kenya         | WASH-B (28)       |             |              |                       |                                                     |  |            |             |  |                |            |            |                                                     |
| Madagascar    | MAHAY (29)        |             |              |                       |                                                     |  |            |             |  |                |            |            |                                                     |
| Malawi        | iLiNS-DYADM (30)  | 148         | 317          | 47.6                  | 1.21 (1.03, 1.42)                                   |  | 0.27       | 0.27        |  |                |            |            |                                                     |
| Malawi        | iLiNS-DOSE (31)   | 424         | 133          | 57.1                  | 0.90 (0.71, 1.13)                                   |  | 0.13       | 0.17        |  |                |            |            |                                                     |
| Mali          | PROMIS CS (32)    |             |              |                       |                                                     |  |            |             |  |                |            |            |                                                     |
| Zimbabwe      | SHINE (HIV-) (33) |             |              |                       |                                                     |  |            |             |  |                |            |            |                                                     |
| Zimbabwe      | SHINE (HIV+) (34) |             |              |                       |                                                     |  |            |             |  |                |            |            |                                                     |
|               |                   | <b>2068</b> | <b>1566</b>  |                       |                                                     |  |            |             |  | <b>600</b>     | <b>401</b> |            |                                                     |
| <b>Fixed</b>  |                   |             |              |                       | <b>I<sup>2</sup> = 0.45, Tau<sup>2</sup> = 0.01</b> |  |            |             |  |                |            |            | <b>I<sup>2</sup> = 0.11, Tau<sup>2</sup> = 0.00</b> |
| <b>Random</b> |                   |             |              |                       | <b>1.09 (1.03, 1.15)</b>                            |  |            |             |  |                |            |            | <b>1.11 (0.98, 1.26)</b>                            |
|               |                   |             |              |                       | <b>1.11 (1.01, 1.22)</b>                            |  |            |             |  |                |            |            | <b>1.13 (0.98, 1.31)</b>                            |

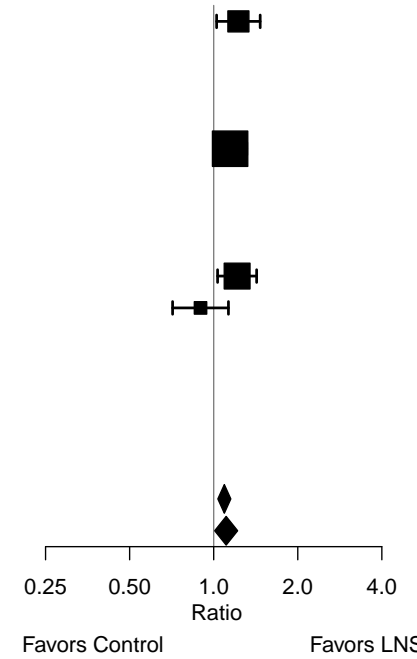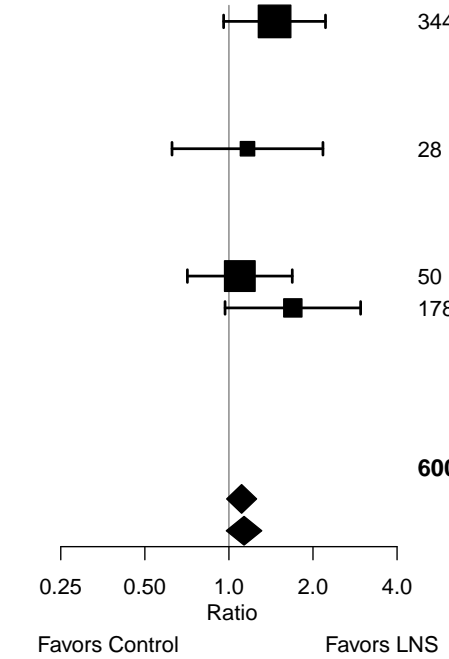

Supplemental figure 5O: 12-mo walking without support prevalence ratio

5O9: Stratified by Child baseline acute malnutrition

P-for-interaction = 0.133  
 Ratio of PRs = 1.13 (0.96, 1.31)

| Country      | Trial             | LNS N | Control N | Control Prevalence | No PR (95% CI)    | Fixed W | Random W | LNS N | Control N | Control Prevalence | Yes PR (95% CI)   | Fixed W | Random W |
|--------------|-------------------|-------|-----------|--------------------|-------------------|---------|----------|-------|-----------|--------------------|-------------------|---------|----------|
| Bangladesh   | RDNS (22)         | 1447  | 689       | 73.0               | 1.26 (1.05, 1.51) | 0.25    | 0.27     |       |           |                    |                   |         |          |
| Bangladesh   | WASH-B (23)       |       |           |                    |                   |         |          | 119   | 50        | 90.0               | 1.93 (0.84, 4.45) | 0.25    | 0.29     |
| Burkina Faso | iLiNS-Zinc (24)   |       |           |                    |                   |         |          |       |           |                    |                   |         |          |
| Ghana        | GHANA (25)        |       |           |                    |                   |         |          |       |           |                    |                   |         |          |
| Ghana        | iLiNS-DYADG (26)  | 284   | 564       | 50.7               | 1.09 (0.95, 1.25) | 0.43    | 0.41     | 23    | 57        | 84.2               | 3.30 (1.61, 6.76) | 0.34    | 0.34     |
| Haiti        | HAITI (27)        |       |           |                    |                   |         |          |       |           |                    |                   |         |          |
| Kenya        | WASH-B (28)       |       |           |                    |                   |         |          |       |           |                    |                   |         |          |
| Madagascar   | MAHAY (29)        |       |           |                    |                   |         |          |       |           |                    |                   |         |          |
| Malawi       | iLiNS-DYADM (30)  | 184   | 374       | 50.3               | 1.17 (1.00, 1.37) | 0.32    | 0.32     | 14    | 39        | 61.5               | 1.30 (0.67, 2.51) | 0.41    | 0.37     |
| Malawi       | iLiNS-DOSE (31)   |       |           |                    |                   |         |          |       |           |                    |                   |         |          |
| Mali         | PROMIS CS (32)    |       |           |                    |                   |         |          |       |           |                    |                   |         |          |
| Zimbabwe     | SHINE (HIV-) (33) |       |           |                    |                   |         |          |       |           |                    |                   |         |          |
| Zimbabwe     | SHINE (HIV+) (34) |       |           |                    |                   |         |          |       |           |                    |                   |         |          |

Fixed  
 Random  
 I<sup>2</sup> = 0.36, Tau<sup>2</sup> = 0.00  
 1.08 (1.03, 1.14)  
 1.10 (1.02, 1.19)

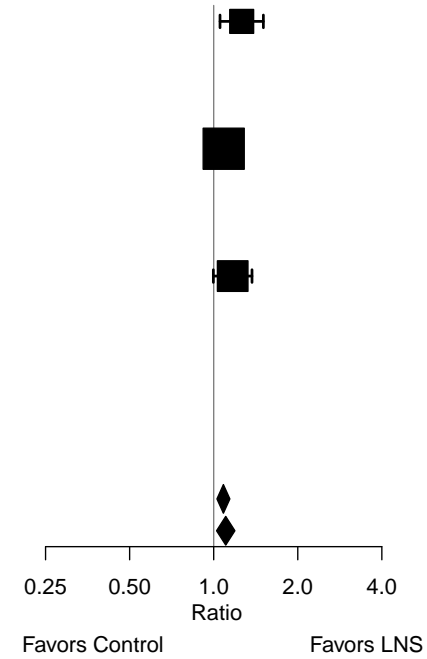

Fixed  
 Random  
 I<sup>2</sup> = 0.70, Tau<sup>2</sup> = 0.15  
 1.19 (1.02, 1.38)  
 1.60 (0.99, 2.58)

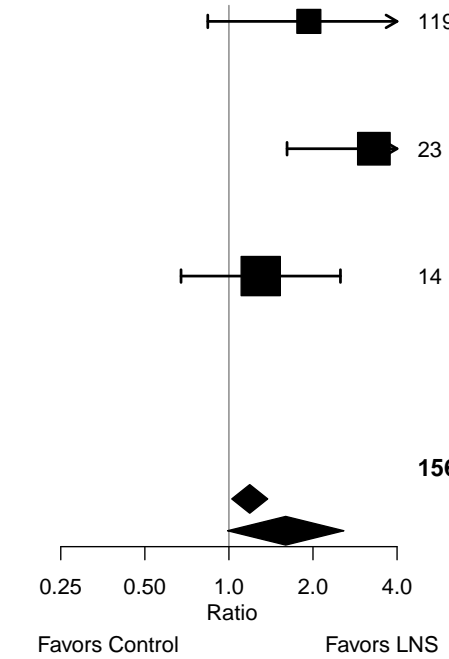

Supplemental figure 5O: 12-mo walking without support prevalence ratio

5O10: Stratified by Child baseline anemia

**P-for-interaction = 0.526**  
**Ratio of PRs = 0.94 (0.78, 1.14)**

| Country       | Trial             | LNS<br>N   | Control<br>N | Control<br>Prevalence | Not anemic<br>PR<br>(95% CI)                        | Fixed<br>W | Random<br>W |  | LNS<br>N   | Control<br>N | Control<br>Prevalence | Anemic<br>PR<br>(95% CI)                            | Fixed<br>W | Random<br>W |
|---------------|-------------------|------------|--------------|-----------------------|-----------------------------------------------------|------------|-------------|--|------------|--------------|-----------------------|-----------------------------------------------------|------------|-------------|
|               |                   |            |              |                       |                                                     |            |             |  |            |              |                       |                                                     |            |             |
| Bangladesh    | RDNS (22)         | 211        | 95           | 71.6                  | 1.20 (0.87, 1.65)                                   | 0.14       | 0.14        |  | 310        | 157          | 74.5                  | 1.20 (0.84, 1.72)                                   | 0.13       | 0.16        |
| Bangladesh    | WASH-B (23)       |            |              |                       |                                                     |            |             |  |            |              |                       |                                                     |            |             |
| Burkina Faso  | iLiNS-Zinc (24)   |            |              |                       |                                                     |            |             |  |            |              |                       |                                                     |            |             |
| Ghana         | GHANA (25)        |            |              |                       |                                                     |            |             |  |            |              |                       |                                                     |            |             |
| Ghana         | iLiNS-DYADG (26)  | 185        | 358          | 51.4                  | 1.22 (1.04, 1.44)                                   | 0.55       | 0.55        |  | 91         | 201          | 55.2                  | 0.93 (0.70, 1.24)                                   | 0.20       | 0.23        |
| Haiti         | HAITI (27)        |            |              |                       |                                                     |            |             |  |            |              |                       |                                                     |            |             |
| Kenya         | WASH-B (28)       |            |              |                       |                                                     |            |             |  |            |              |                       |                                                     |            |             |
| Madagascar    | MAHAY (29)        |            |              |                       |                                                     |            |             |  |            |              |                       |                                                     |            |             |
| Malawi        | iLiNS-DYADM (30)  | 63         | 143          | 45.5                  | 1.05 (0.81, 1.36)                                   | 0.20       | 0.20        |  | 135        | 266          | 54.1                  | 1.28 (1.05, 1.55)                                   | 0.45       | 0.38        |
| Malawi        | iLiNS-DOSE (31)   | 205        | 84           | 67.9                  | 1.20 (0.84, 1.71)                                   | 0.11       | 0.11        |  | 393        | 116          | 63.8                  | 0.96 (0.73, 1.27)                                   | 0.22       | 0.24        |
| Mali          | PROMIS CS (32)    |            |              |                       |                                                     |            |             |  |            |              |                       |                                                     |            |             |
| Zimbabwe      | SHINE (HIV-) (33) |            |              |                       |                                                     |            |             |  |            |              |                       |                                                     |            |             |
| Zimbabwe      | SHINE (HIV+) (34) |            |              |                       |                                                     |            |             |  |            |              |                       |                                                     |            |             |
| <b>Fixed</b>  |                   | <b>664</b> | <b>680</b>   |                       | <b>I<sup>2</sup> = 0.00, Tau<sup>2</sup> = 0.00</b> |            |             |  | <b>929</b> | <b>740</b>   |                       | <b>I<sup>2</sup> = 0.35, Tau<sup>2</sup> = 0.01</b> |            |             |
| <b>Random</b> |                   |            |              |                       | <b>1.18 (1.05, 1.33)</b>                            |            |             |  |            |              |                       | <b>1.12 (0.98, 1.27)</b>                            |            |             |
|               |                   |            |              |                       | <b>1.18 (1.05, 1.33)</b>                            |            |             |  |            |              |                       | <b>1.10 (0.94, 1.29)</b>                            |            |             |

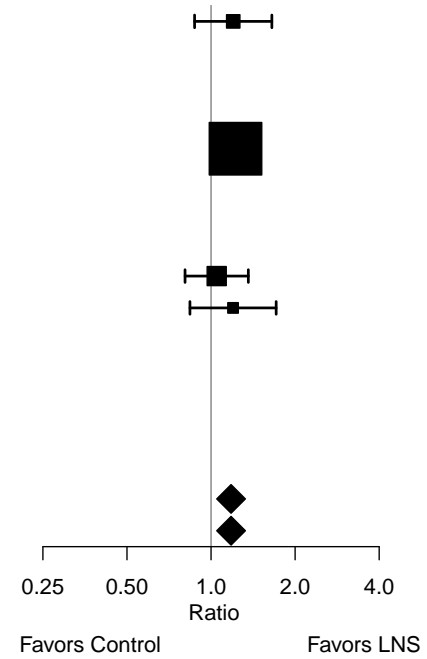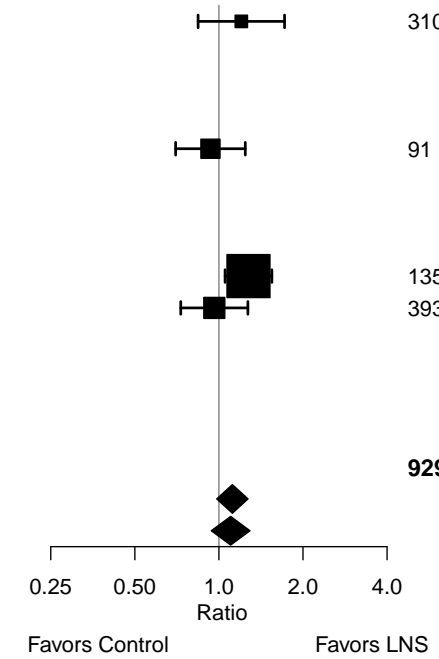

### Supplemental figure 5P: 12-mo walking without support prevalence difference

#### 5P1: Stratified by Maternal height

P-for-interaction = 0.192

Difference in PDs = -0.04 (-0.09, 0.02)

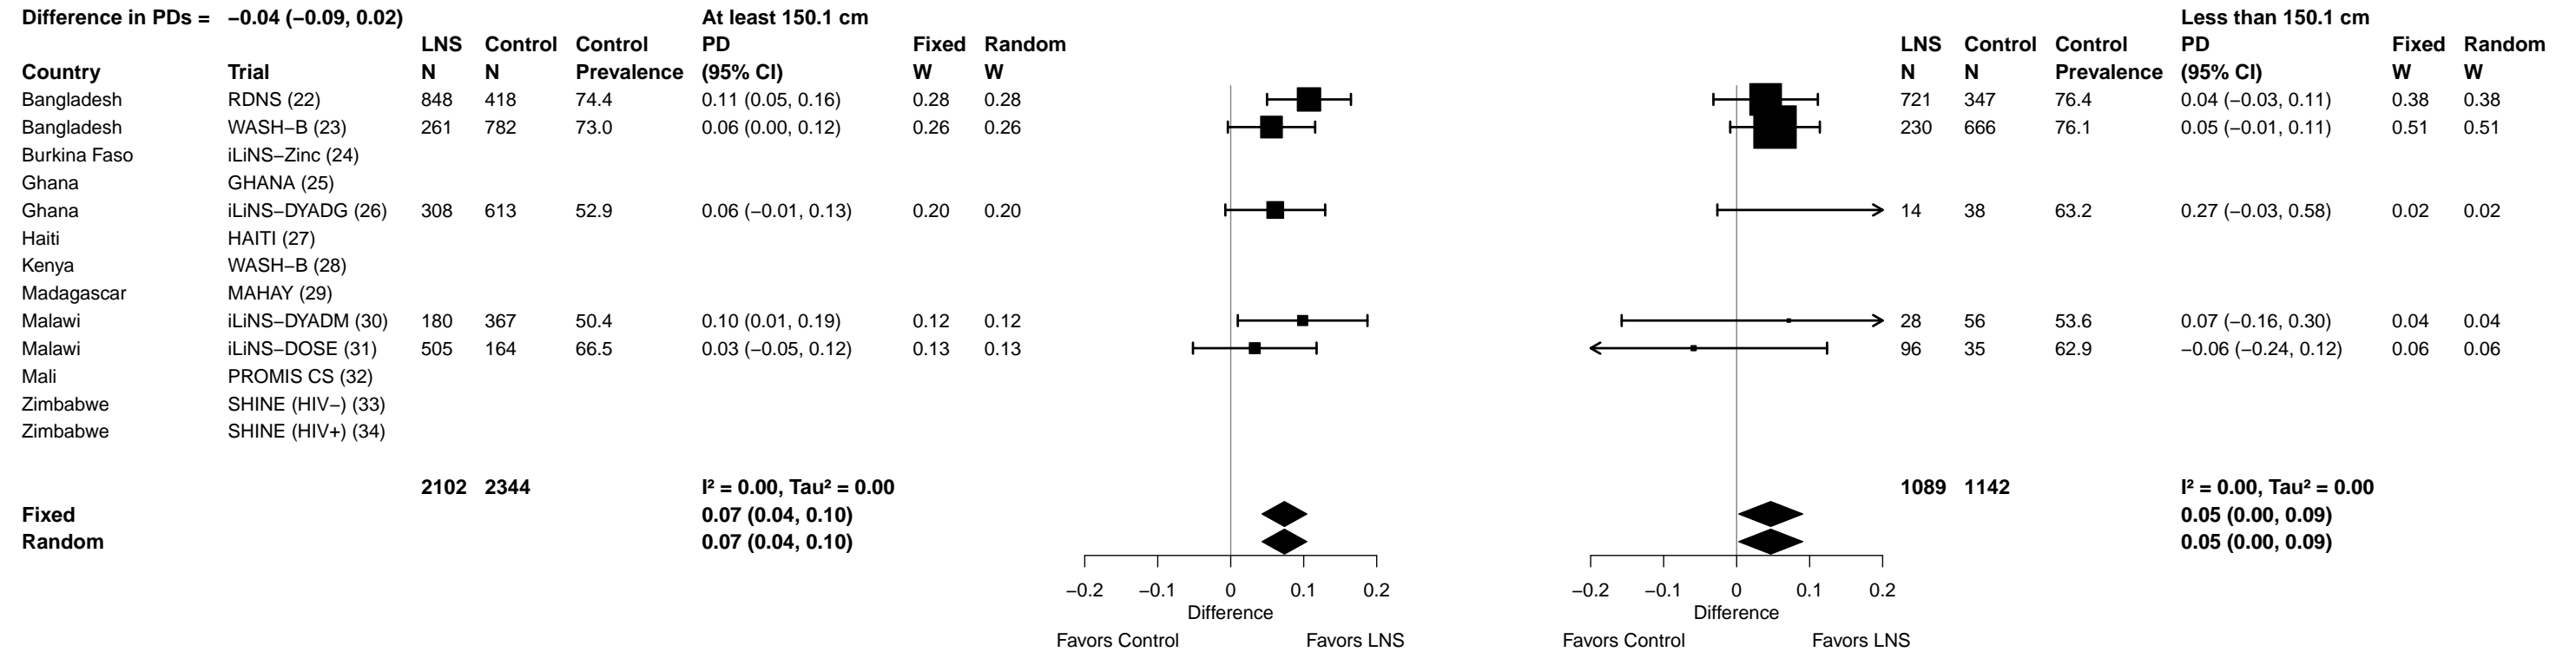



Supplemental figure 5P: 12-mo walking without support prevalence difference

5P2: Stratified by Maternal BMI

P-for-interaction = 0.058  
 Difference in PDs = -0.05 (-0.09, 0.00)

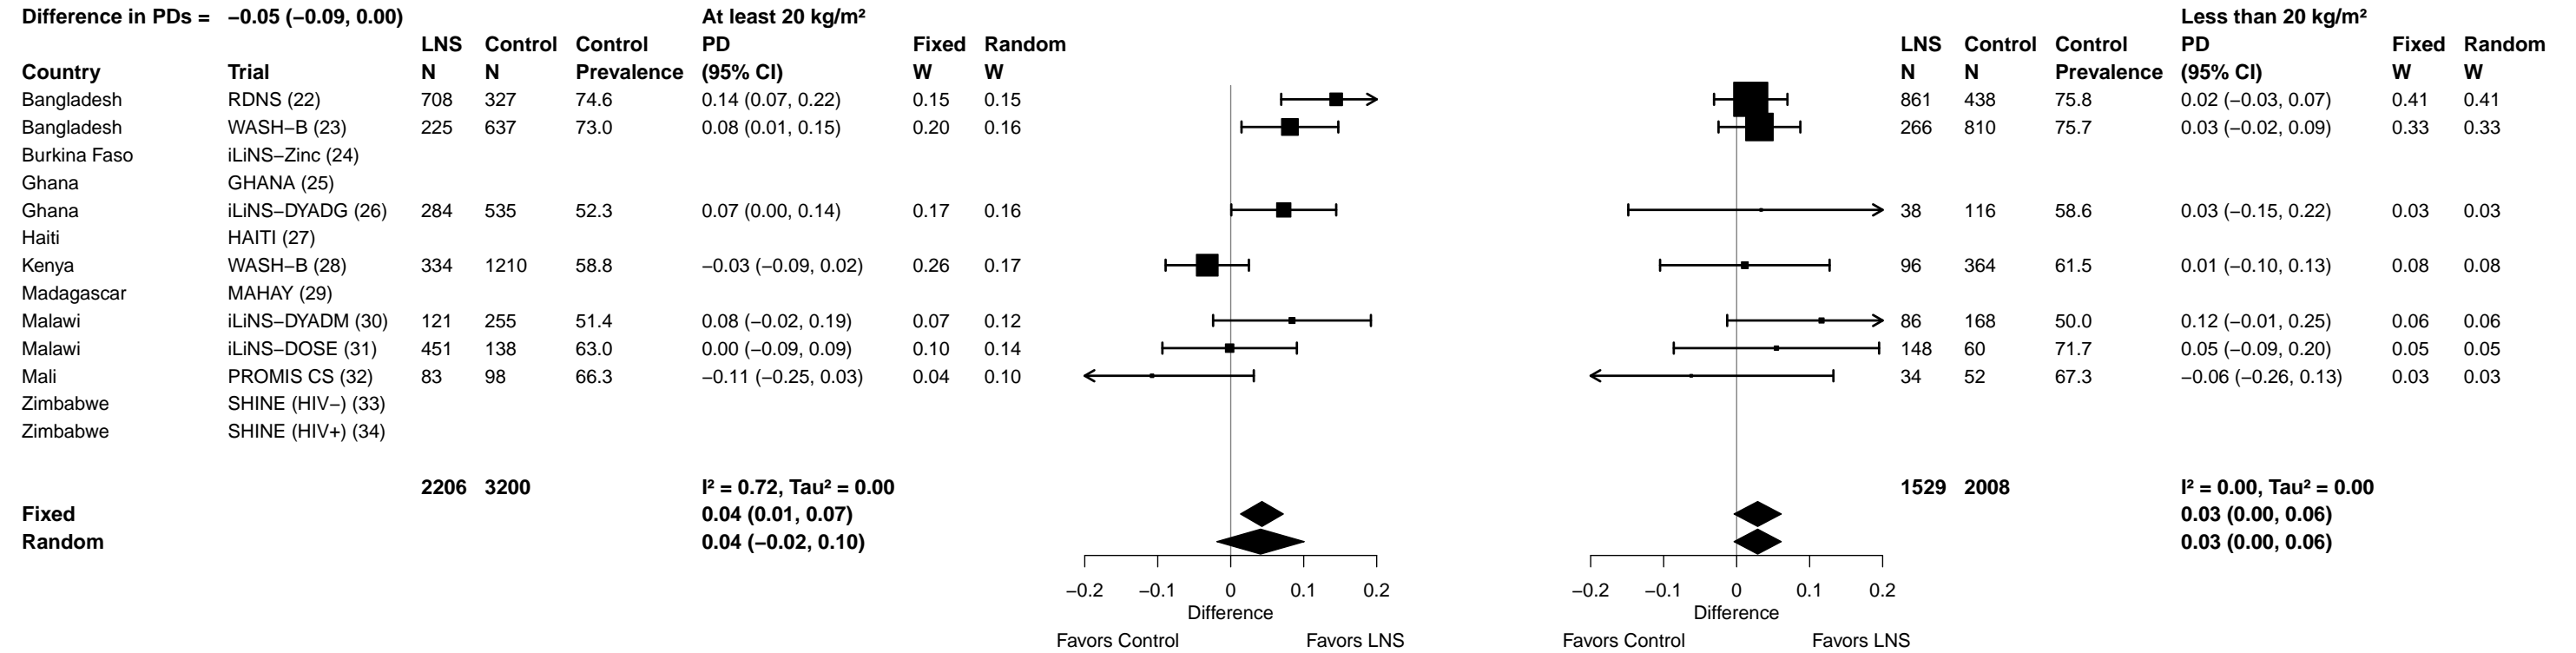

Supplemental figure 5P: 12-mo walking without support prevalence difference

5P3: Stratified by Maternal age

**P-for-interaction = 0.315**  
**Difference in PDs = 0.02 (-0.02, 0.06)**

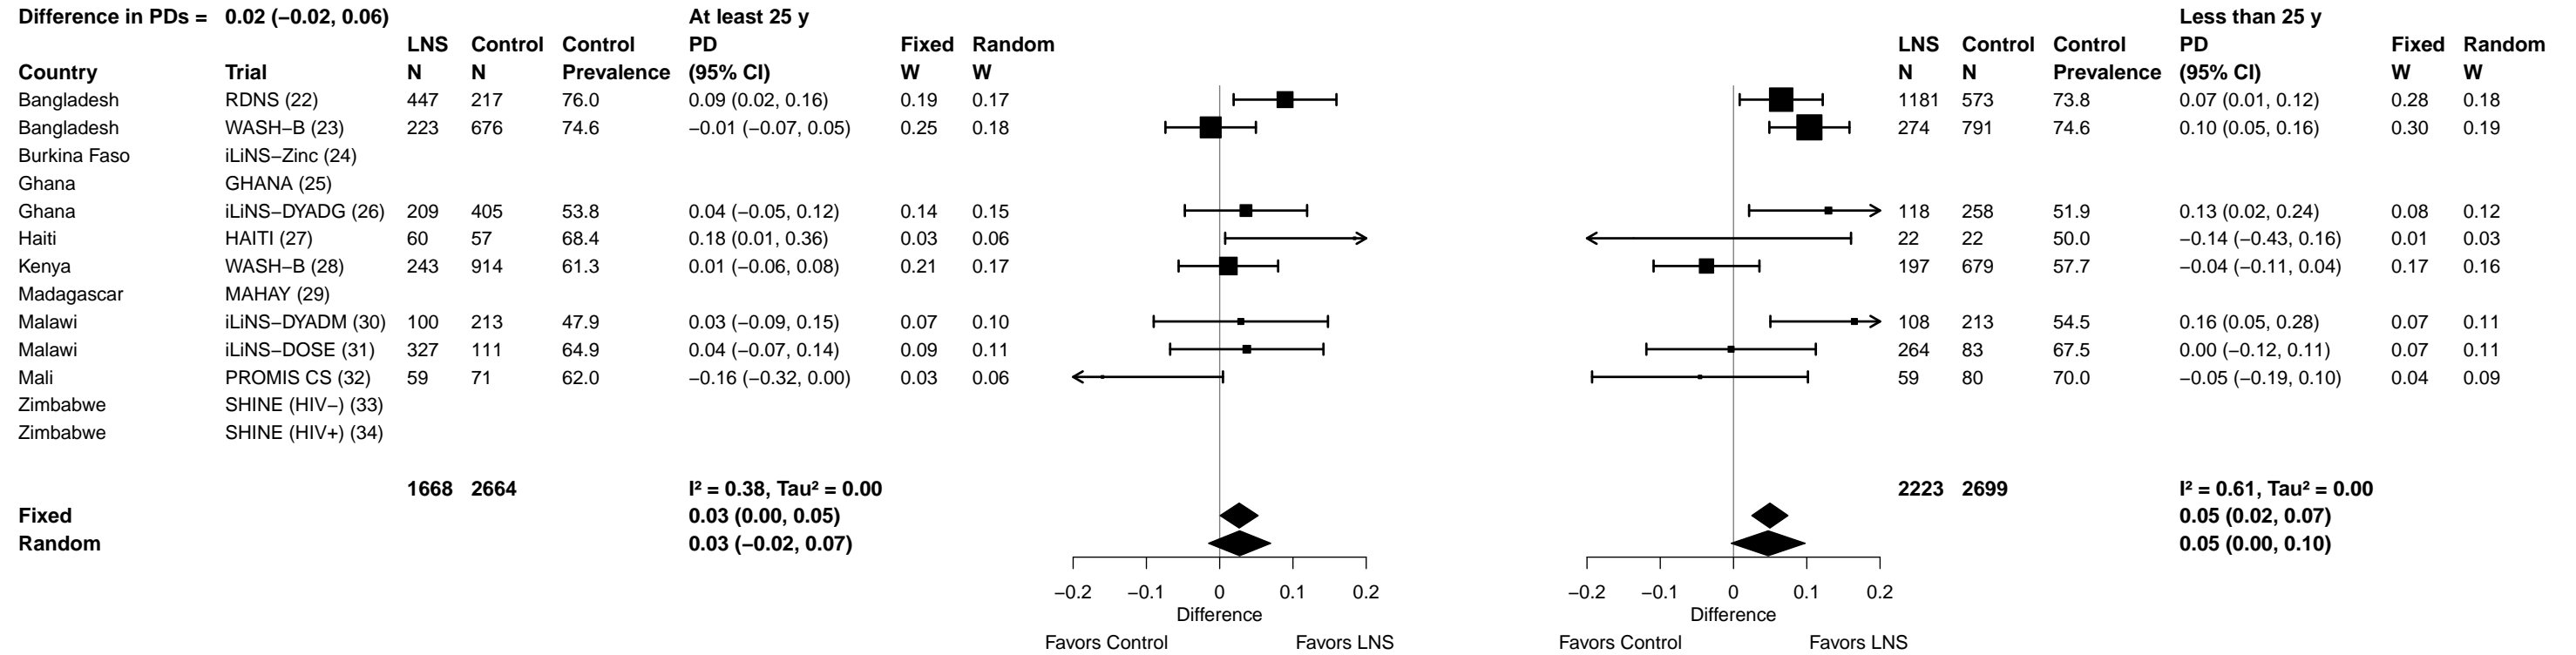

Supplemental figure 5P: 12-mo walking without support prevalence difference

5P4: Stratified by Maternal education

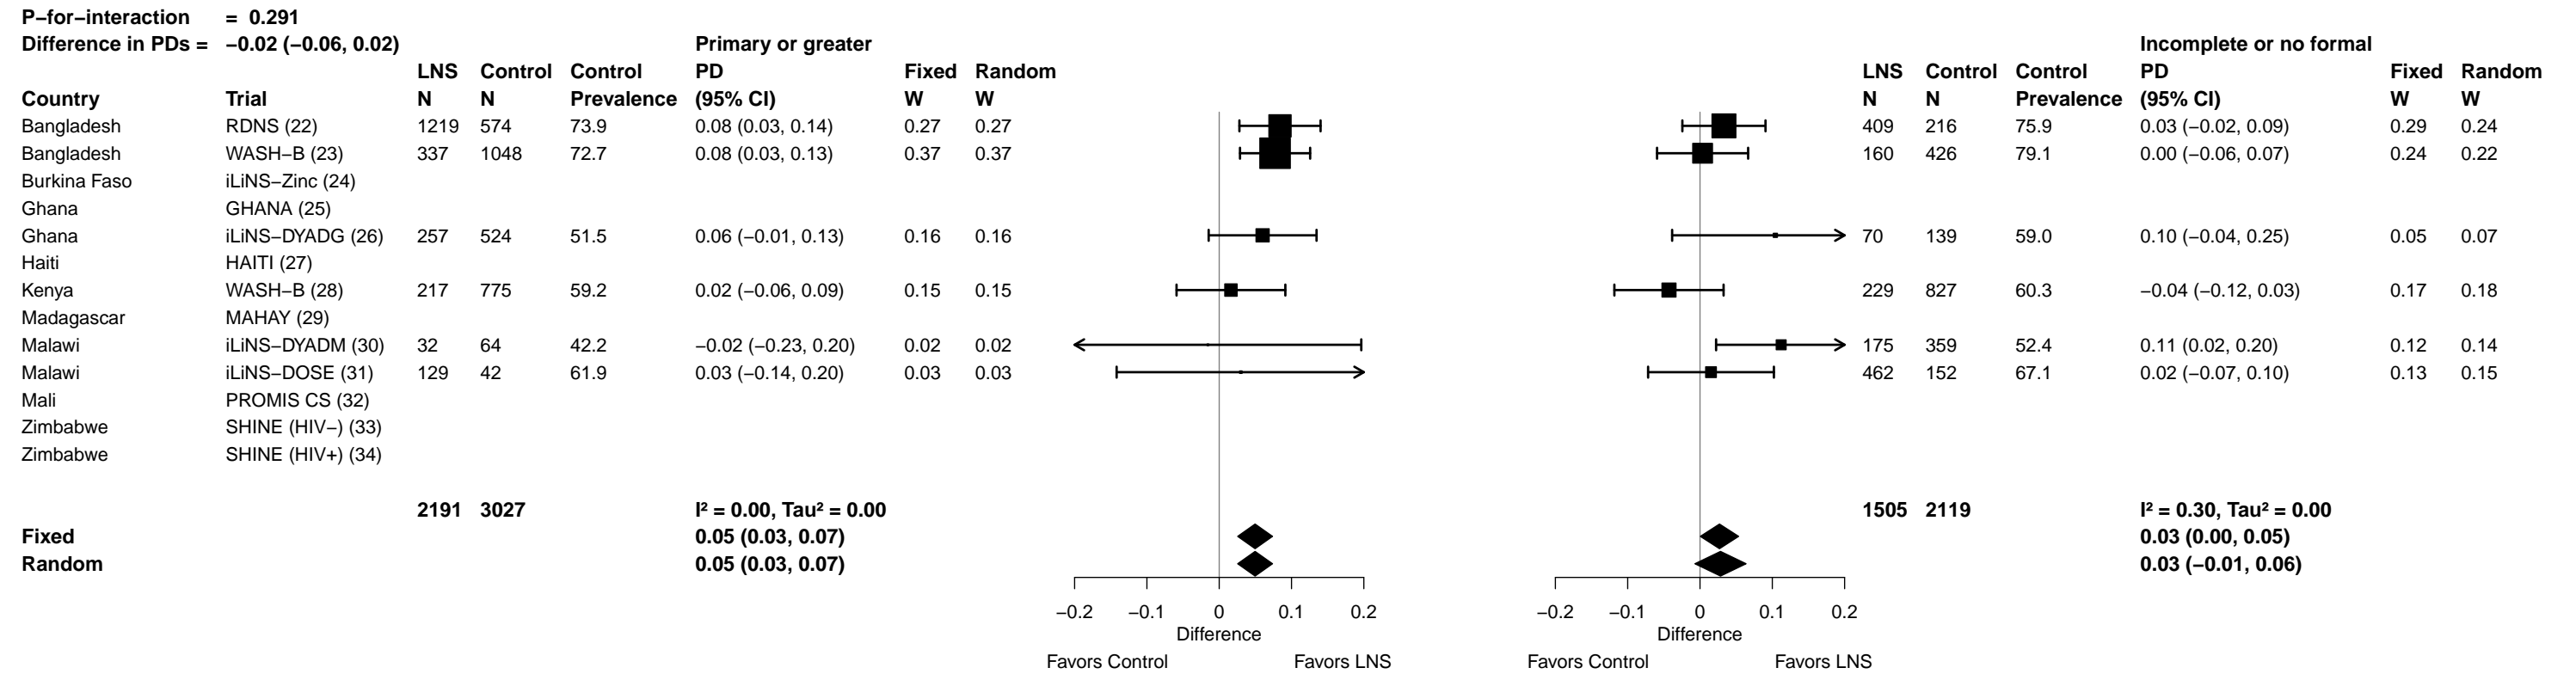

Supplemental figure 5P: 12-mo walking without support prevalence difference

5P5: Stratified by Maternal depressive symptoms

P-for-interaction = 0.606  
 Difference in PDs = -0.01 (-0.06, 0.04)

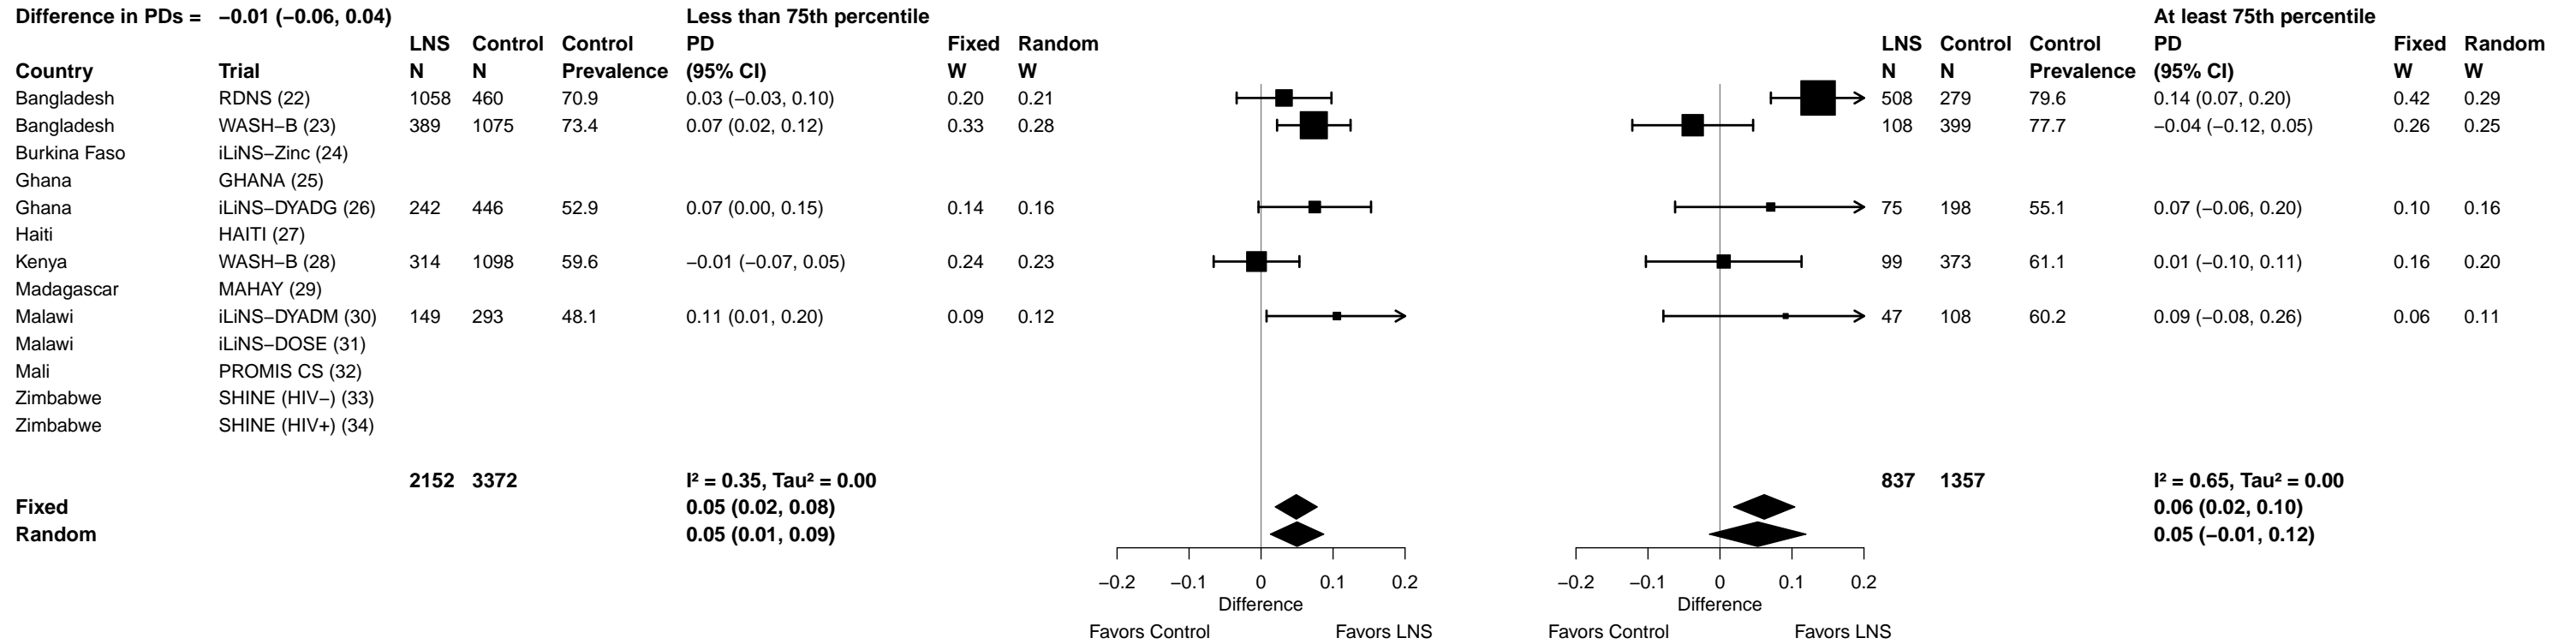

Supplemental figure 5P: 12-mo walking without support prevalence difference

5P6: Stratified by Child sex

P-for-interaction = 0.816  
 Difference in PDs = 0.00 (-0.03, 0.04)

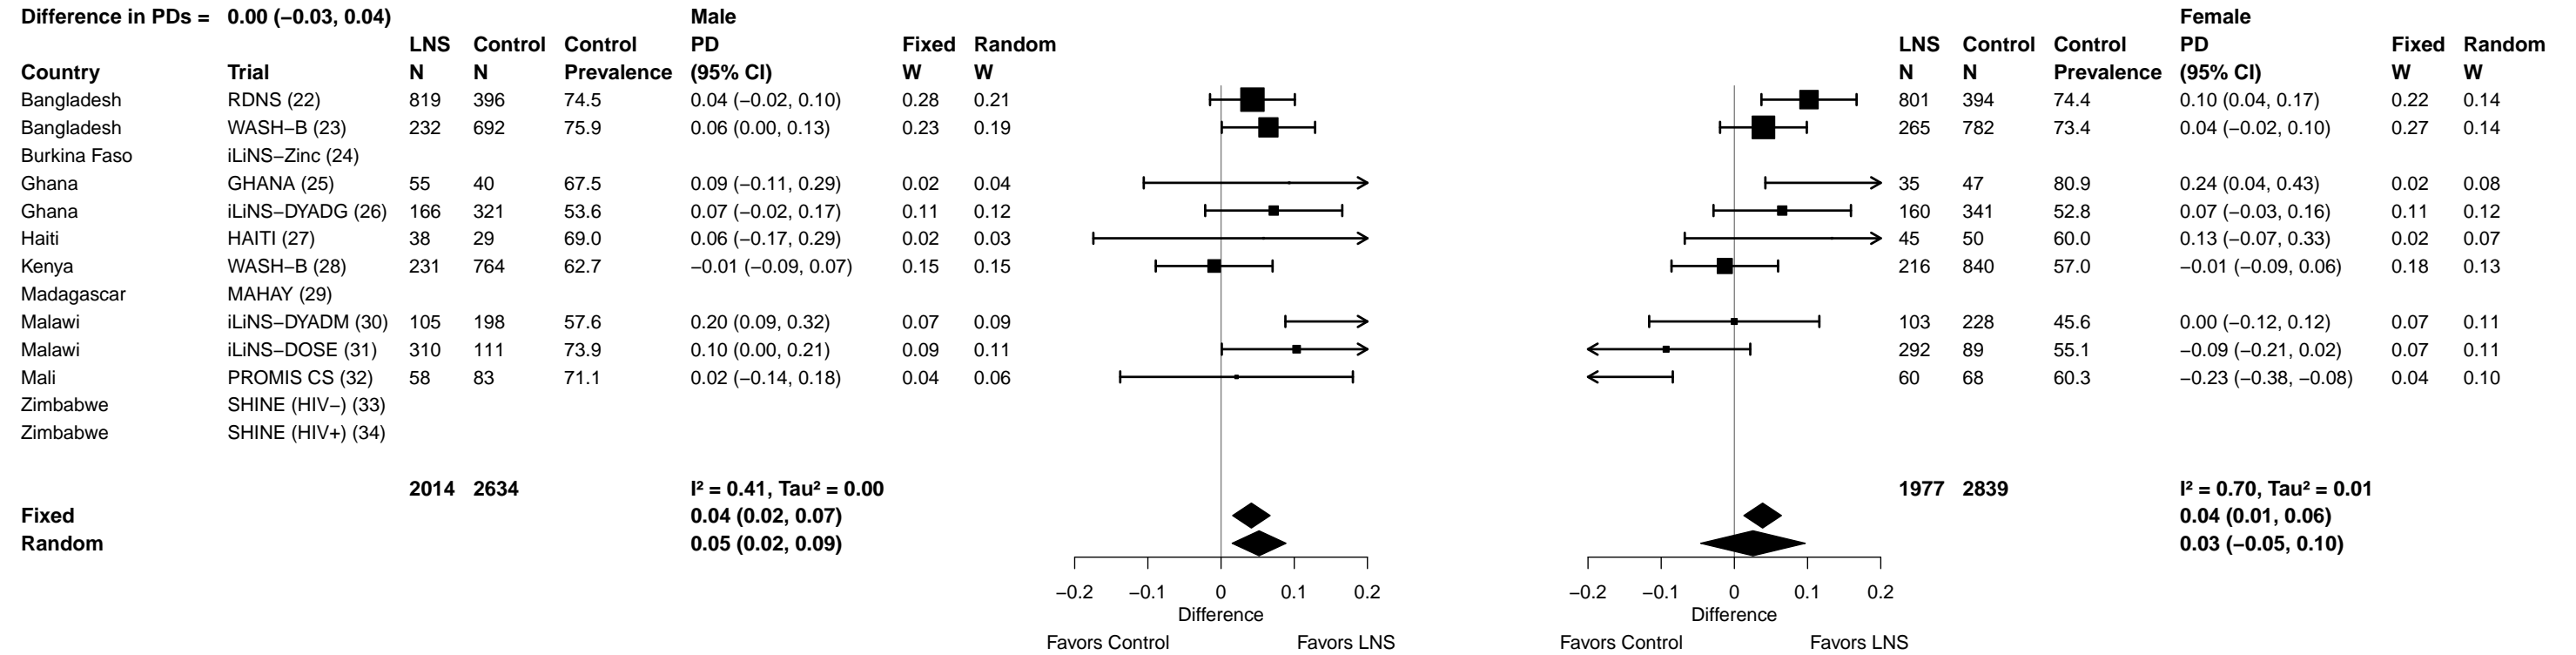

Supplemental figure 5P: 12-mo walking without support prevalence difference

5P7: Stratified by Child birth order

P-for-interaction = 0.055  
 Difference in PDs = -0.04 (-0.08, 0.00)

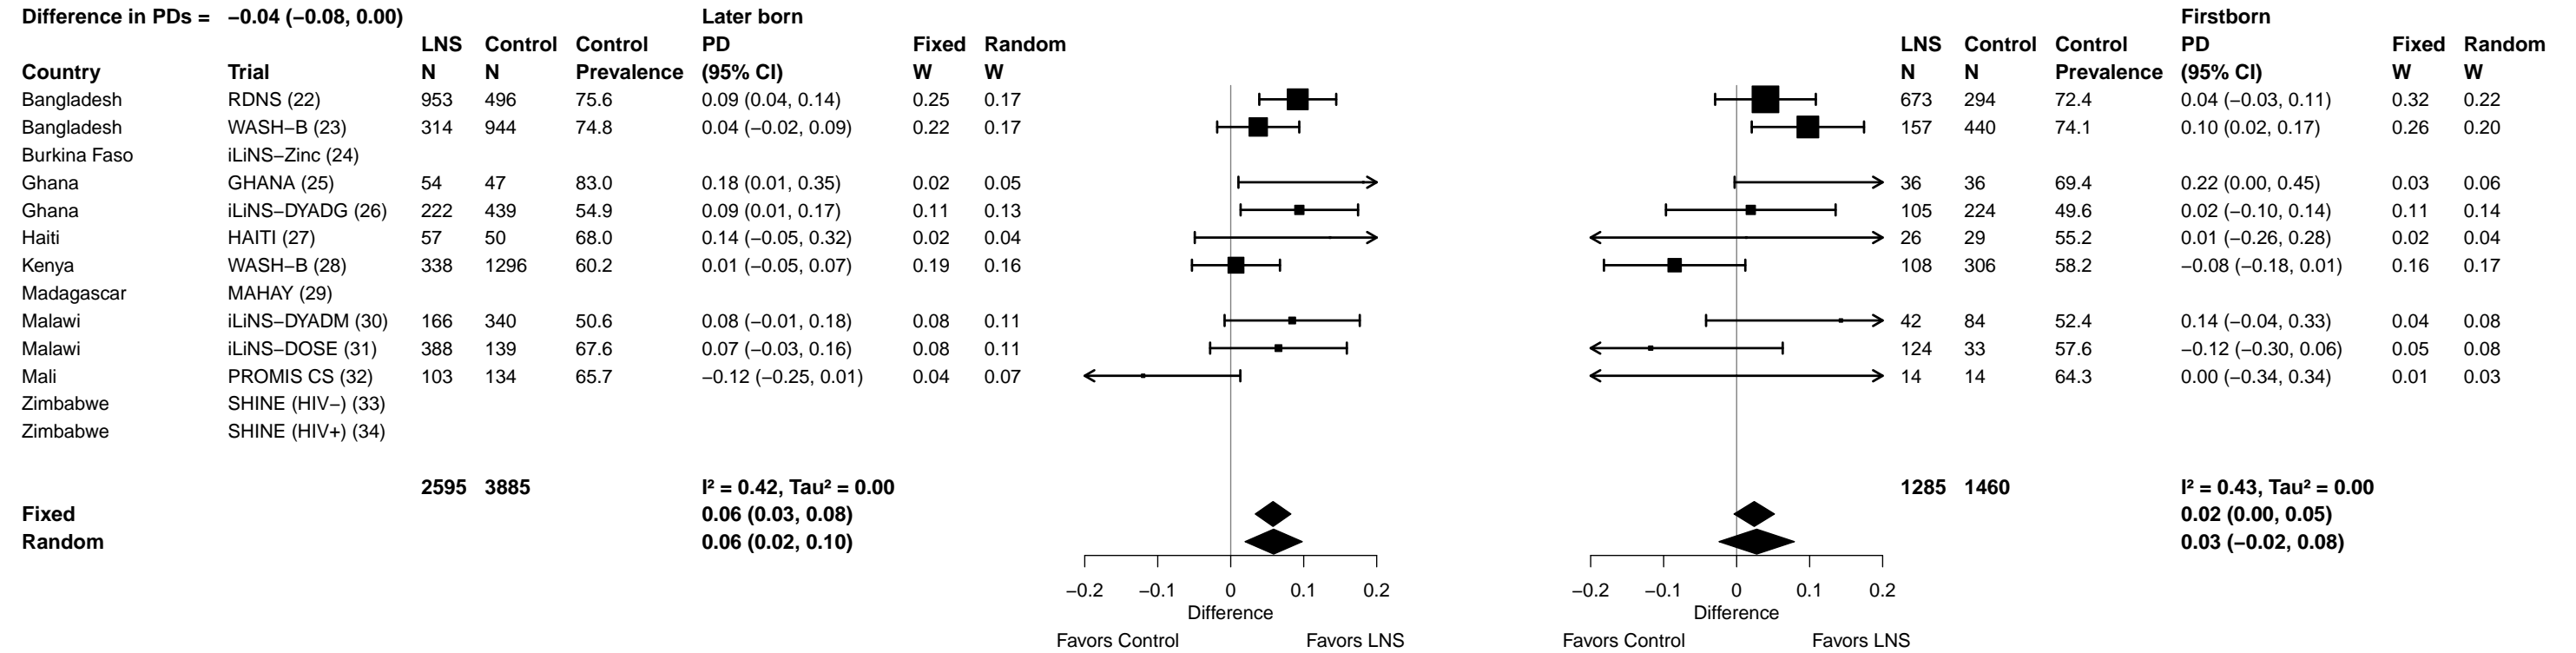

Supplemental figure 5P: 12-mo walking without support prevalence difference

5P8: Stratified by Child baseline stunting

**P-for-interaction = 0.517**  
**Difference in PDs = 0.02 (-0.03, 0.07)**

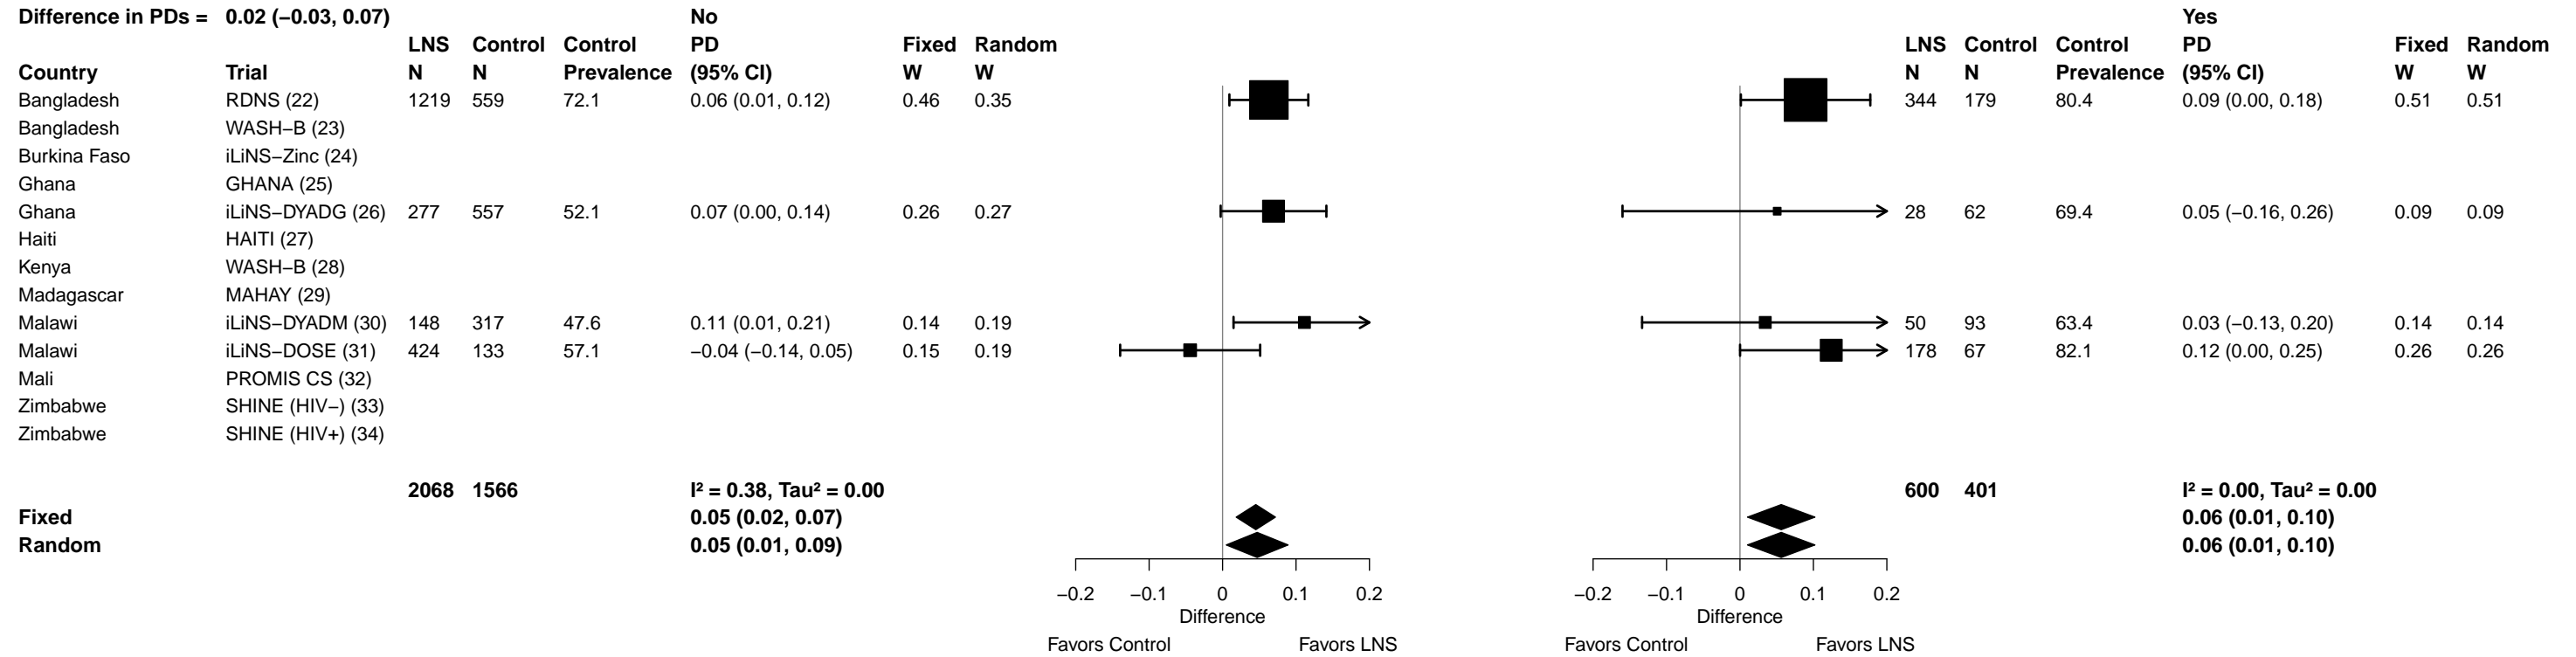

Supplemental figure 5P: 12-mo walking without support prevalence difference

5P9: Stratified by Child baseline acute malnutrition

**P-for-interaction = 0.170**  
**Difference in PDs = 0.04 (-0.02, 0.11)**

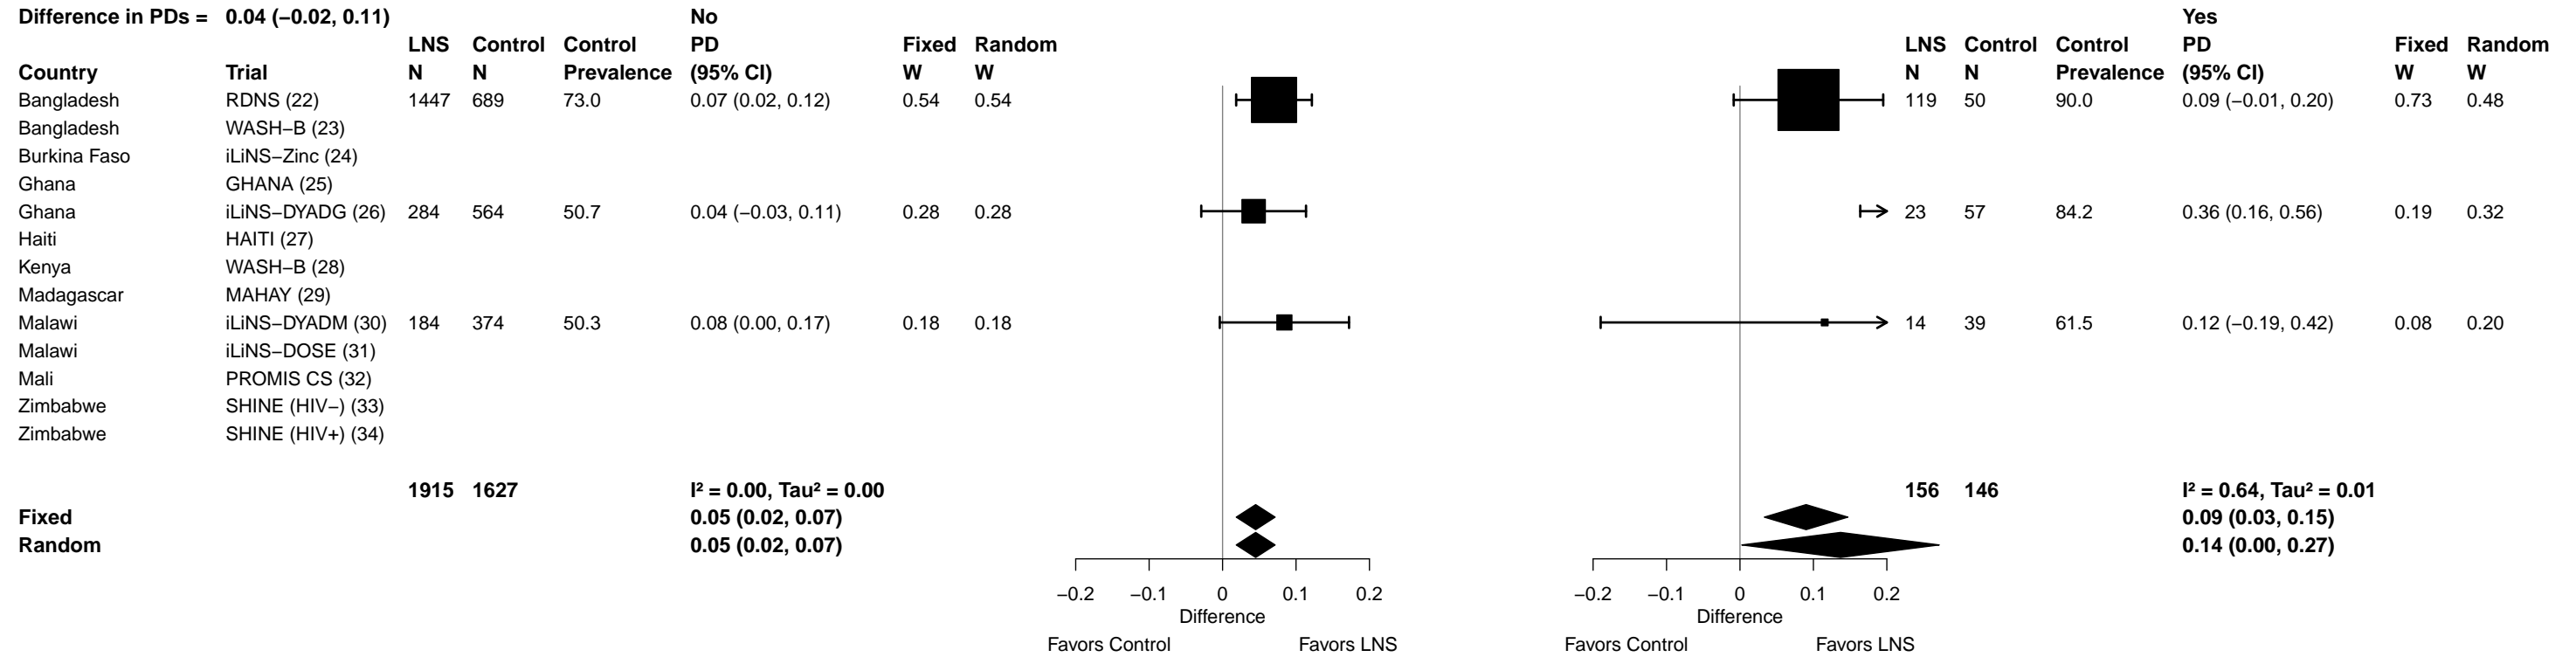



Supplemental figure 5P: 12-mo walking without support prevalence difference

5P10: Stratified by Child baseline anemia

**P-for-interaction = 0.330**  
**Difference in PDs = -0.04 (-0.12, 0.04)**

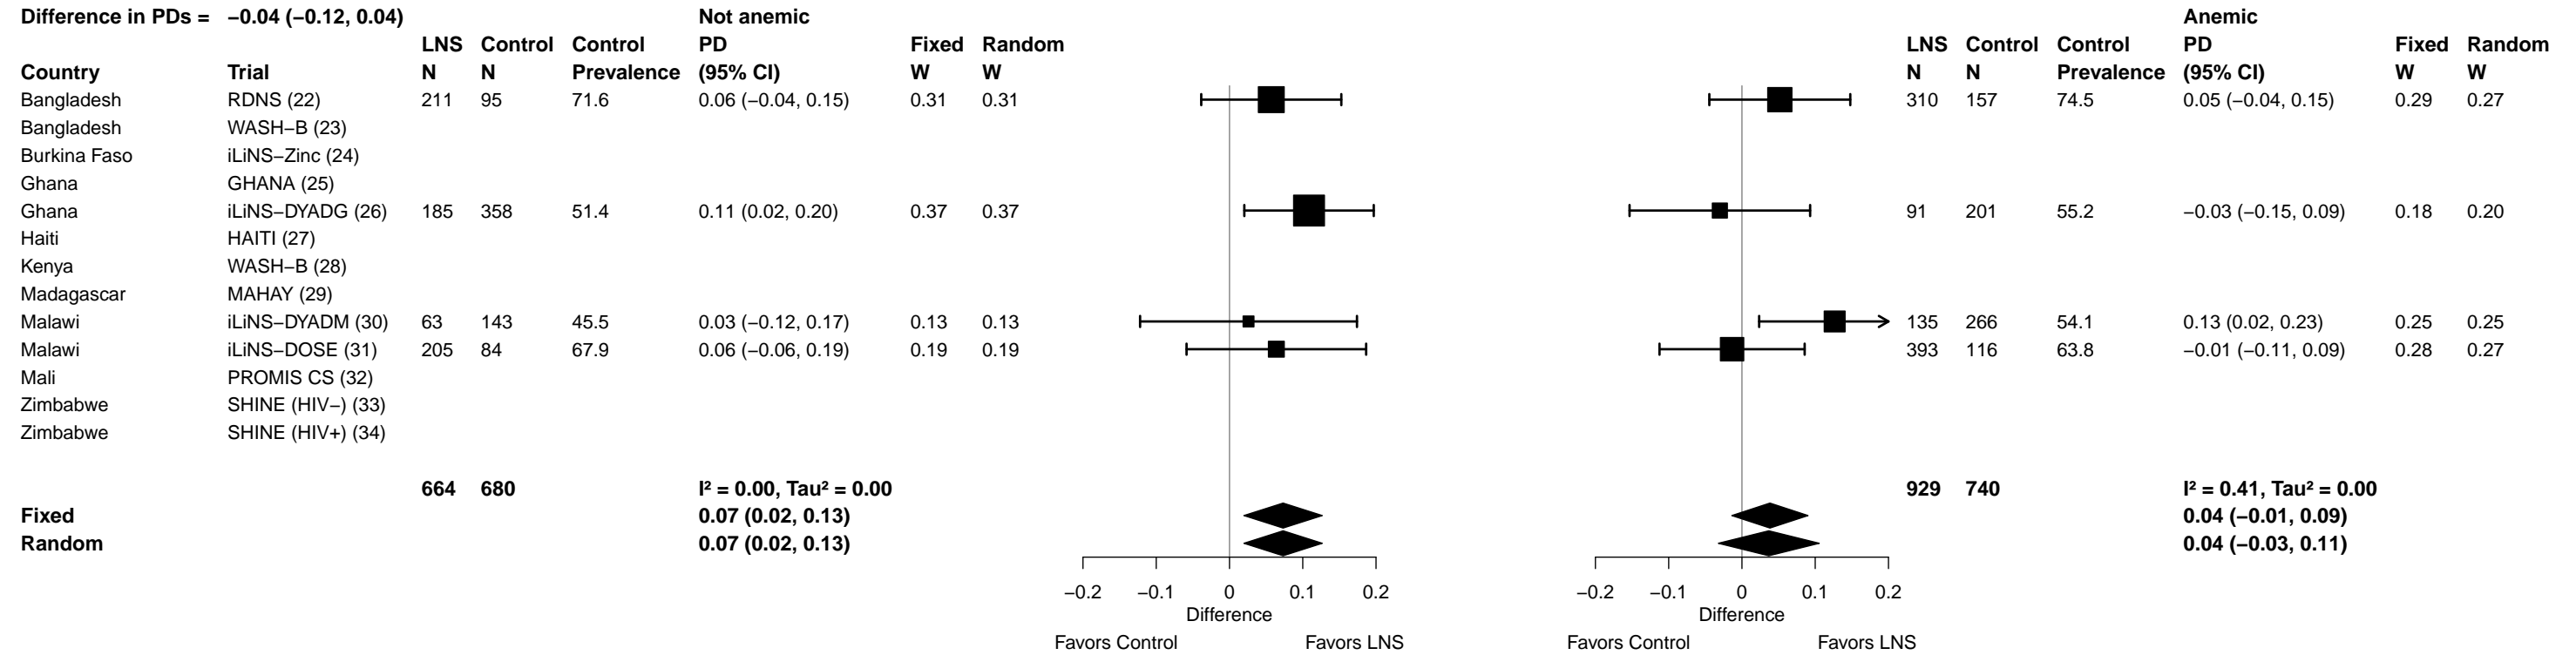

## Supplemental figure 6: Forest plots for effects of SQ-LNS on developmental outcomes stratified by all individual-level household effect modifiers

### Contents

|                                                                                         |               |
|-----------------------------------------------------------------------------------------|---------------|
| <b>Supplemental figure 6A: Mean difference in language z-score</b>                      | <b>4</b>      |
| 6A1: Stratified by Household socio-economic status . . . . .                            | 4             |
| 6A2: Stratified by Household food insecurity . . . . .                                  | 5             |
| 6A3: Stratified by Household source water quality . . . . .                             | 6             |
| 6A4: Stratified by Household sanitation . . . . .                                       | 7             |
| 6A5: Stratified by Home environment . . . . .                                           | 8             |
| 6A6: Stratified by Season at the time of assessment . . . . .                           | 9             |
| <br><b>Supplemental figure 6B: Language lowest decile prevalence ratio</b>              | <br><b>10</b> |
| 6B1: Stratified by Household socio-economic status . . . . .                            | 10            |
| 6B2: Stratified by Household food insecurity . . . . .                                  | 11            |
| 6B3: Stratified by Household source water quality . . . . .                             | 12            |
| 6B4: Stratified by Household sanitation . . . . .                                       | 13            |
| 6B5: Stratified by Home environment . . . . .                                           | 14            |
| 6B6: Stratified by Season at the time of assessment . . . . .                           | 15            |
| <br><b>Supplemental figure 6C: Language lowest decile prevalence difference</b>         | <br><b>16</b> |
| 6C1: Stratified by Household socio-economic status . . . . .                            | 16            |
| 6C2: Stratified by Household food insecurity . . . . .                                  | 17            |
| 6C3: Stratified by Household source water quality . . . . .                             | 18            |
| 6C4: Stratified by Household sanitation . . . . .                                       | 19            |
| 6C5: Stratified by Home environment . . . . .                                           | 20            |
| 6C6: Stratified by Season at the time of assessment . . . . .                           | 21            |
| <br><b>Supplemental figure 6D: Mean difference in social-emotional z-score</b>          | <br><b>22</b> |
| 6D1: Stratified by Household socio-economic status . . . . .                            | 22            |
| 6D2: Stratified by Household food insecurity . . . . .                                  | 23            |
| 6D3: Stratified by Household source water quality . . . . .                             | 24            |
| 6D4: Stratified by Household sanitation . . . . .                                       | 25            |
| 6D5: Stratified by Home environment . . . . .                                           | 26            |
| 6D6: Stratified by Season at the time of assessment . . . . .                           | 27            |
| <br><b>Supplemental figure 6E: Social-emotional lowest decile prevalence ratio</b>      | <br><b>28</b> |
| 6E1: Stratified by Household socio-economic status . . . . .                            | 28            |
| 6E2: Stratified by Household food insecurity . . . . .                                  | 29            |
| 6E3: Stratified by Household source water quality . . . . .                             | 30            |
| 6E4: Stratified by Household sanitation . . . . .                                       | 31            |
| 6E5: Stratified by Home environment . . . . .                                           | 32            |
| 6E6: Stratified by Season at the time of assessment . . . . .                           | 33            |
| <br><b>Supplemental figure 6F: Social-emotional lowest decile prevalence difference</b> | <br><b>34</b> |

|                                                                              |           |
|------------------------------------------------------------------------------|-----------|
| 6F1: Stratified by Household socio-economic status . . . . .                 | 34        |
| 6F2: Stratified by Household food insecurity . . . . .                       | 35        |
| 6F3: Stratified by Household source water quality . . . . .                  | 36        |
| 6F4: Stratified by Household sanitation . . . . .                            | 37        |
| 6F5: Stratified by Home environment . . . . .                                | 38        |
| 6F6: Stratified by Season at the time of assessment . . . . .                | 39        |
| <b>Supplemental figure 6G: Mean difference in motor z-score</b>              | <b>40</b> |
| 6G1: Stratified by Household socio-economic status . . . . .                 | 40        |
| 6G2: Stratified by Household food insecurity . . . . .                       | 41        |
| 6G3: Stratified by Household source water quality . . . . .                  | 42        |
| 6G4: Stratified by Household sanitation . . . . .                            | 43        |
| 6G5: Stratified by Home environment . . . . .                                | 44        |
| 6G6: Stratified by Season at the time of assessment . . . . .                | 45        |
| <b>Supplemental figure 6H: Motor lowest decile prevalence ratio</b>          | <b>46</b> |
| 6H1: Stratified by Household socio-economic status . . . . .                 | 46        |
| 6H2: Stratified by Household food insecurity . . . . .                       | 47        |
| 6H3: Stratified by Household source water quality . . . . .                  | 48        |
| 6H4: Stratified by Household sanitation . . . . .                            | 49        |
| 6H5: Stratified by Home environment . . . . .                                | 50        |
| 6H6: Stratified by Season at the time of assessment . . . . .                | 51        |
| <b>Supplemental figure 6I: Motor lowest decile prevalence difference</b>     | <b>52</b> |
| 6I1: Stratified by Household socio-economic status . . . . .                 | 52        |
| 6I2: Stratified by Household food insecurity . . . . .                       | 53        |
| 6I3: Stratified by Household source water quality . . . . .                  | 54        |
| 6I4: Stratified by Household sanitation . . . . .                            | 55        |
| 6I5: Stratified by Home environment . . . . .                                | 56        |
| 6I6: Stratified by Season at the time of assessment . . . . .                | 57        |
| <b>Supplemental figure 6J: Mean difference in gross motor z-score</b>        | <b>58</b> |
| 6J1: Stratified by Household socio-economic status . . . . .                 | 58        |
| 6J2: Stratified by Household food insecurity . . . . .                       | 59        |
| 6J3: Stratified by Household source water quality . . . . .                  | 60        |
| 6J4: Stratified by Household sanitation . . . . .                            | 61        |
| 6J5: Stratified by Home environment . . . . .                                | 62        |
| 6J6: Stratified by Season at the time of assessment . . . . .                | 63        |
| <b>Supplemental figure 6K: Mean difference in fine motor z-score</b>         | <b>64</b> |
| 6K1: Stratified by Household socio-economic status . . . . .                 | 64        |
| 6K2: Stratified by Household food insecurity . . . . .                       | 65        |
| 6K3: Stratified by Household source water quality . . . . .                  | 66        |
| 6K4: Stratified by Household sanitation . . . . .                            | 67        |
| 6K5: Stratified by Home environment . . . . .                                | 68        |
| 6K6: Stratified by Season at the time of assessment . . . . .                | 69        |
| <b>Supplemental figure 6L: Mean difference in executive function z-score</b> | <b>70</b> |
| 6L1: Stratified by Household socio-economic status . . . . .                 | 70        |
| 6L2: Stratified by Household food insecurity . . . . .                       | 71        |
| 6L3: Stratified by Household source water quality . . . . .                  | 72        |

|                                                                                        |           |
|----------------------------------------------------------------------------------------|-----------|
| 6L4: Stratified by Household sanitation . . . . .                                      | 73        |
| 6L5: Stratified by Home environment . . . . .                                          | 74        |
| 6L6: Stratified by Season at the time of assessment . . . . .                          | 75        |
| <b>Supplemental figure 6M: Executive function lowest decile prevalence ratio</b>       | <b>76</b> |
| 6M1: Stratified by Household socio-economic status . . . . .                           | 76        |
| 6M2: Stratified by Household food insecurity . . . . .                                 | 77        |
| 6M3: Stratified by Household source water quality (insufficient comparisons) . . . . . | 78        |
| 6M4: Stratified by Household sanitation (insufficient comparisons) . . . . .           | 79        |
| 6M5: Stratified by Home environment . . . . .                                          | 80        |
| 6M6: Stratified by Season at the time of assessment . . . . .                          | 81        |
| <b>Supplemental figure 6N: Executive function lowest decile prevalence difference</b>  | <b>82</b> |
| 6N1: Stratified by Household socio-economic status . . . . .                           | 82        |
| 6N2: Stratified by Household food insecurity . . . . .                                 | 83        |
| 6N3: Stratified by Household source water quality (insufficient comparisons) . . . . . | 84        |
| 6N4: Stratified by Household sanitation (insufficient comparisons) . . . . .           | 85        |
| 6N5: Stratified by Home environment . . . . .                                          | 86        |
| 6N6: Stratified by Season at the time of assessment . . . . .                          | 87        |
| <b>Supplemental figure 6O: 12-mo walking without support prevalence ratio</b>          | <b>88</b> |
| 6O1: Stratified by Household socio-economic status . . . . .                           | 88        |
| 6O2: Stratified by Household food insecurity . . . . .                                 | 89        |
| 6O3: Stratified by Household source water quality . . . . .                            | 90        |
| 6O4: Stratified by Household sanitation . . . . .                                      | 91        |
| 6O5: Stratified by Home environment . . . . .                                          | 92        |
| 6O6: Stratified by Season at the time of assessment . . . . .                          | 93        |
| <b>Supplemental figure 6P: 12-mo walking without support prevalence difference</b>     | <b>94</b> |
| 6P1: Stratified by Household socio-economic status . . . . .                           | 94        |
| 6P2: Stratified by Household food insecurity . . . . .                                 | 95        |
| 6P3: Stratified by Household source water quality . . . . .                            | 96        |
| 6P4: Stratified by Household sanitation . . . . .                                      | 97        |
| 6P5: Stratified by Home environment . . . . .                                          | 98        |
| 6P6: Stratified by Season at the time of assessment . . . . .                          | 99        |

These figures are forest plots showing the individual-level effect modification of intervention effects. Each figure has the estimates of intervention effect stratified within study by individual-level effect modifier category. For dichotomous outcomes analyzed via prevalence ratios, the effect estimate is the prevalence in the LNS group divided by the prevalence in the control group. For dichotomous outcomes analyzed via prevalence differences, the effect estimate is the prevalence in the LNS group minus the prevalence in the control group. The labels on the far left correspond to trial level information. In the middle left and on the right the values indicate the study level effect estimate, confidence interval, and weighting for deriving the pooled estimates is shown by subgroup.

Motor milestone figures show individual trial estimates excluding the JiVitA-4 data because those individual trial results have not yet been published. The pooled estimate in each figure includes the JiVitA-4 data, for consistency with all other analyses.

### Supplemental figure 6A: Mean difference in language z-score

#### 6A1: Stratified by Household socio-economic status

**P-for-interaction = 0.001**  
**Difference in MDs = 0.10 (0.04, 0.15)**

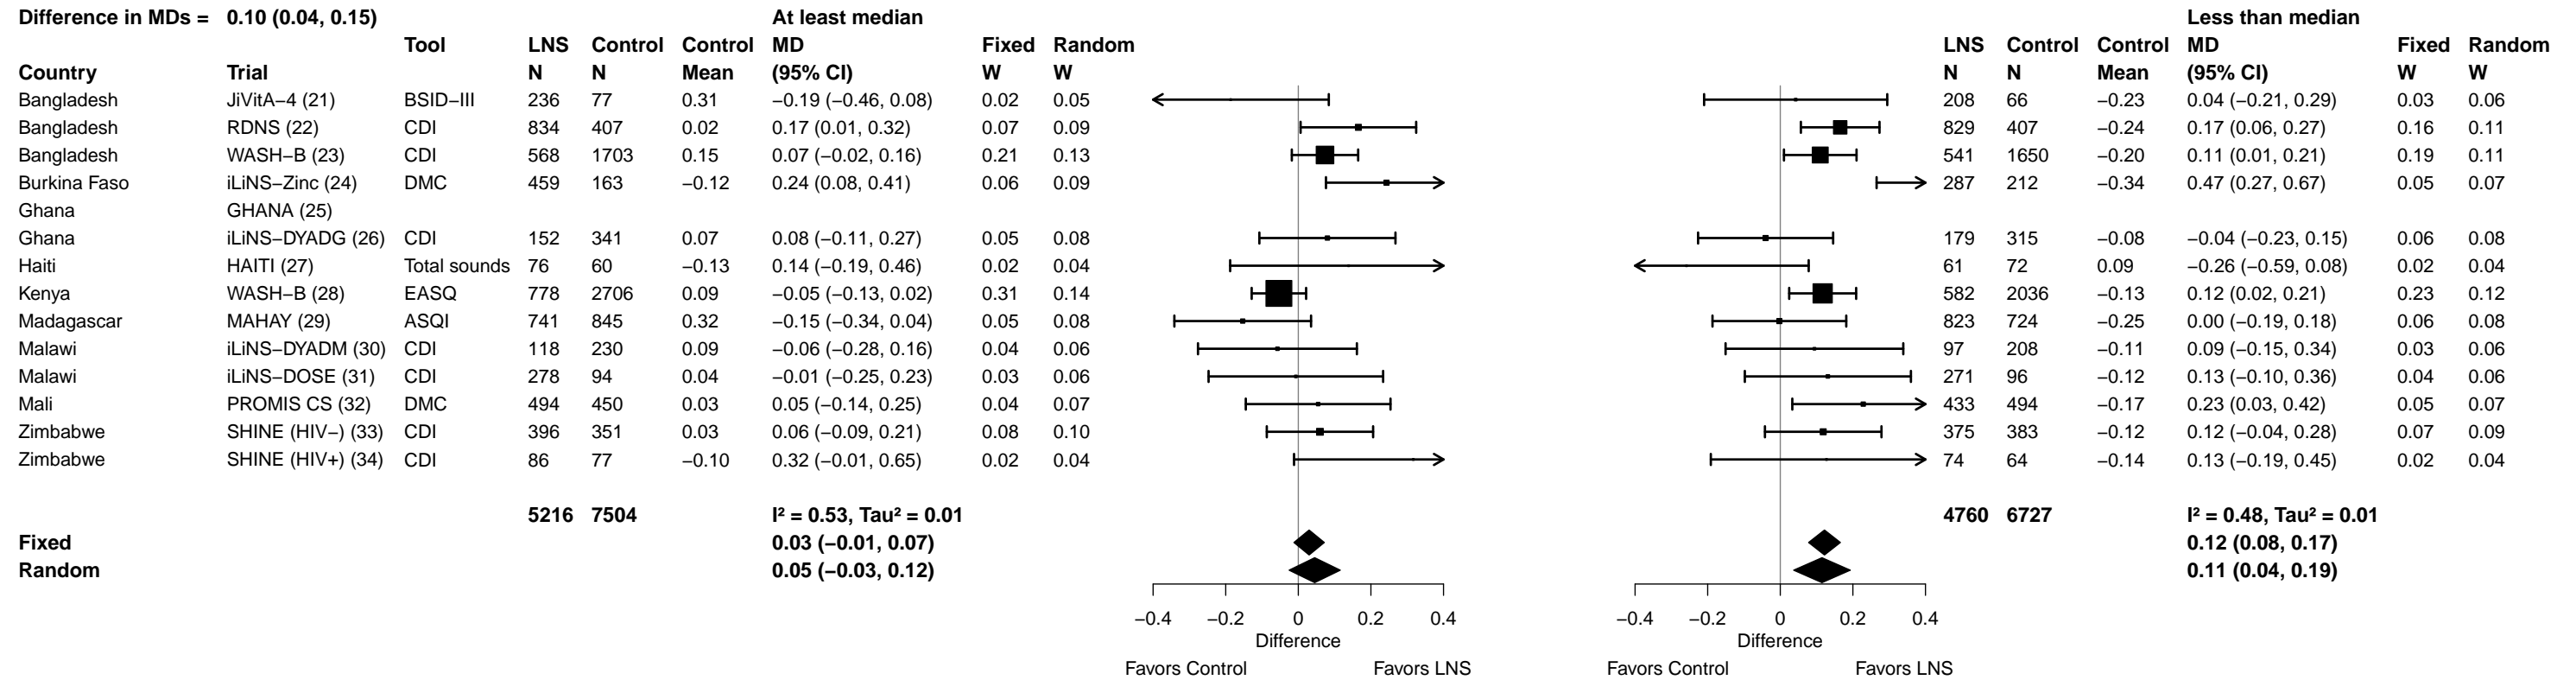

Supplemental figure 6A: Mean difference in language z-score

6A2: Stratified by Household food insecurity

P-for-interaction = 0.627

Difference in MDs = 0.02 (-0.05, 0.09)

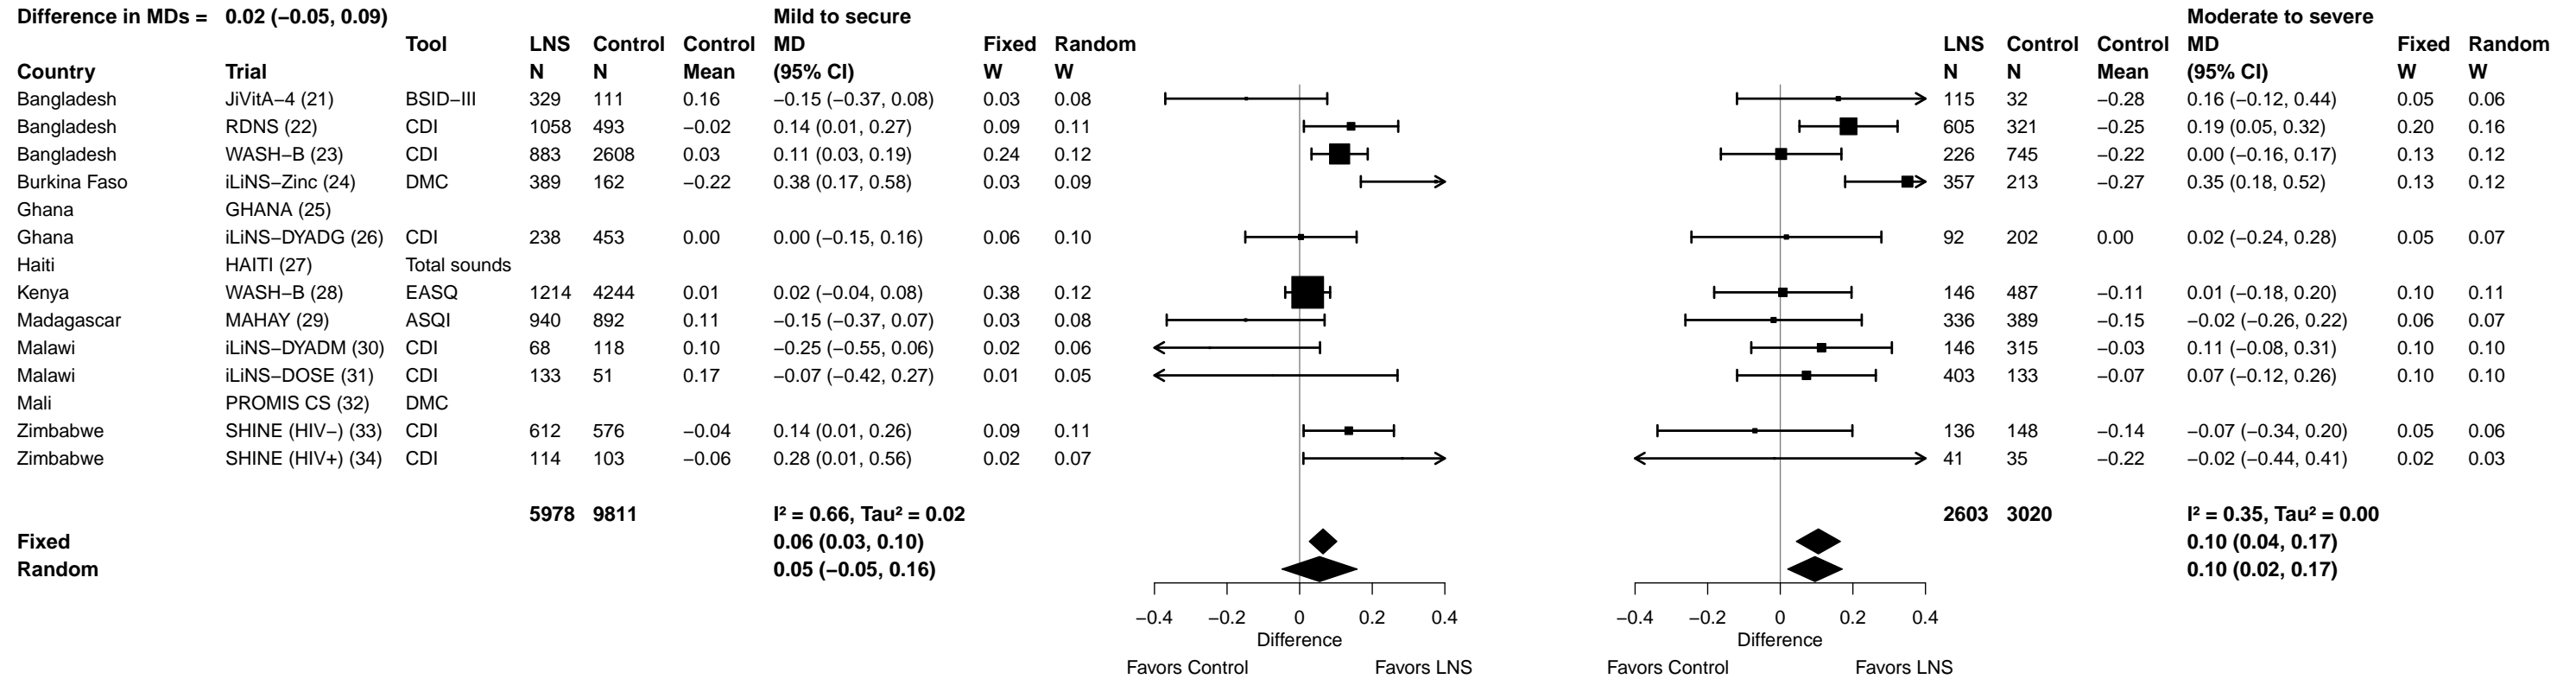

Supplemental figure 6A: Mean difference in language z-score

6A3: Stratified by Household source water quality

**P-for-interaction = 0.988**  
**Difference in MDs = 0.00 (-0.11, 0.11)**

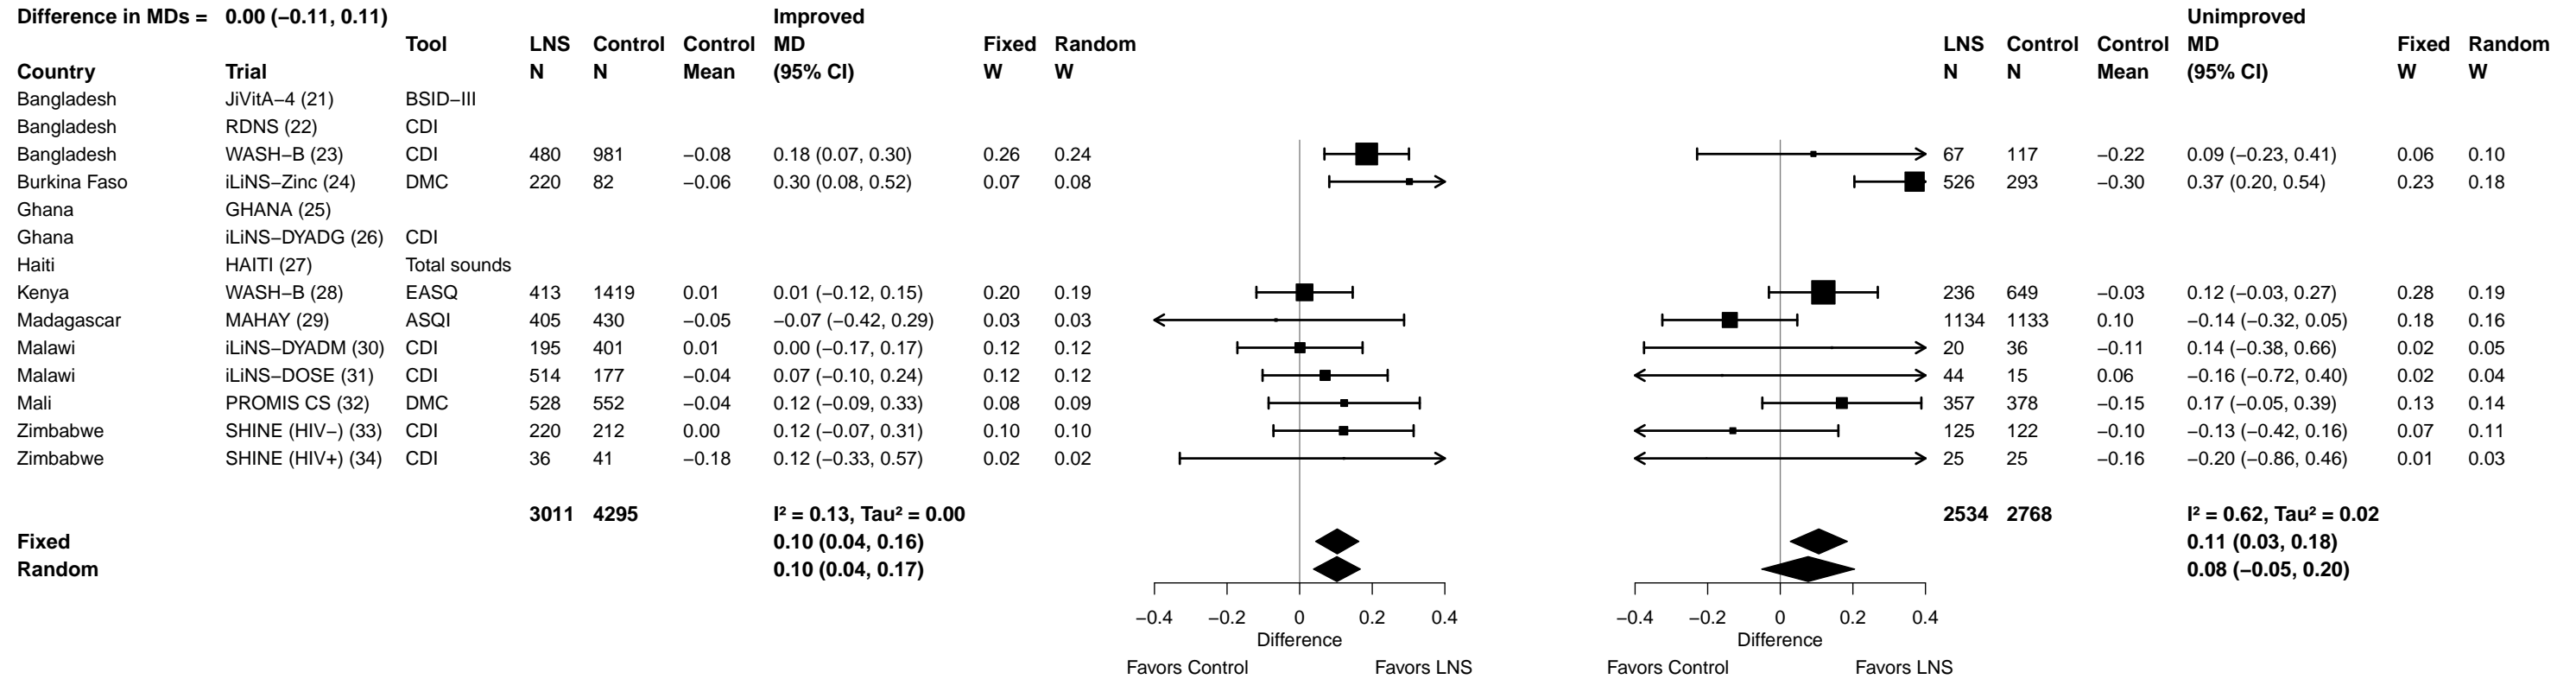

Supplemental figure 6A: Mean difference in language z-score

6A4: Stratified by Household sanitation

P-for-interaction = 0.218  
 Difference in MDs = -0.06 (-0.16, 0.04)

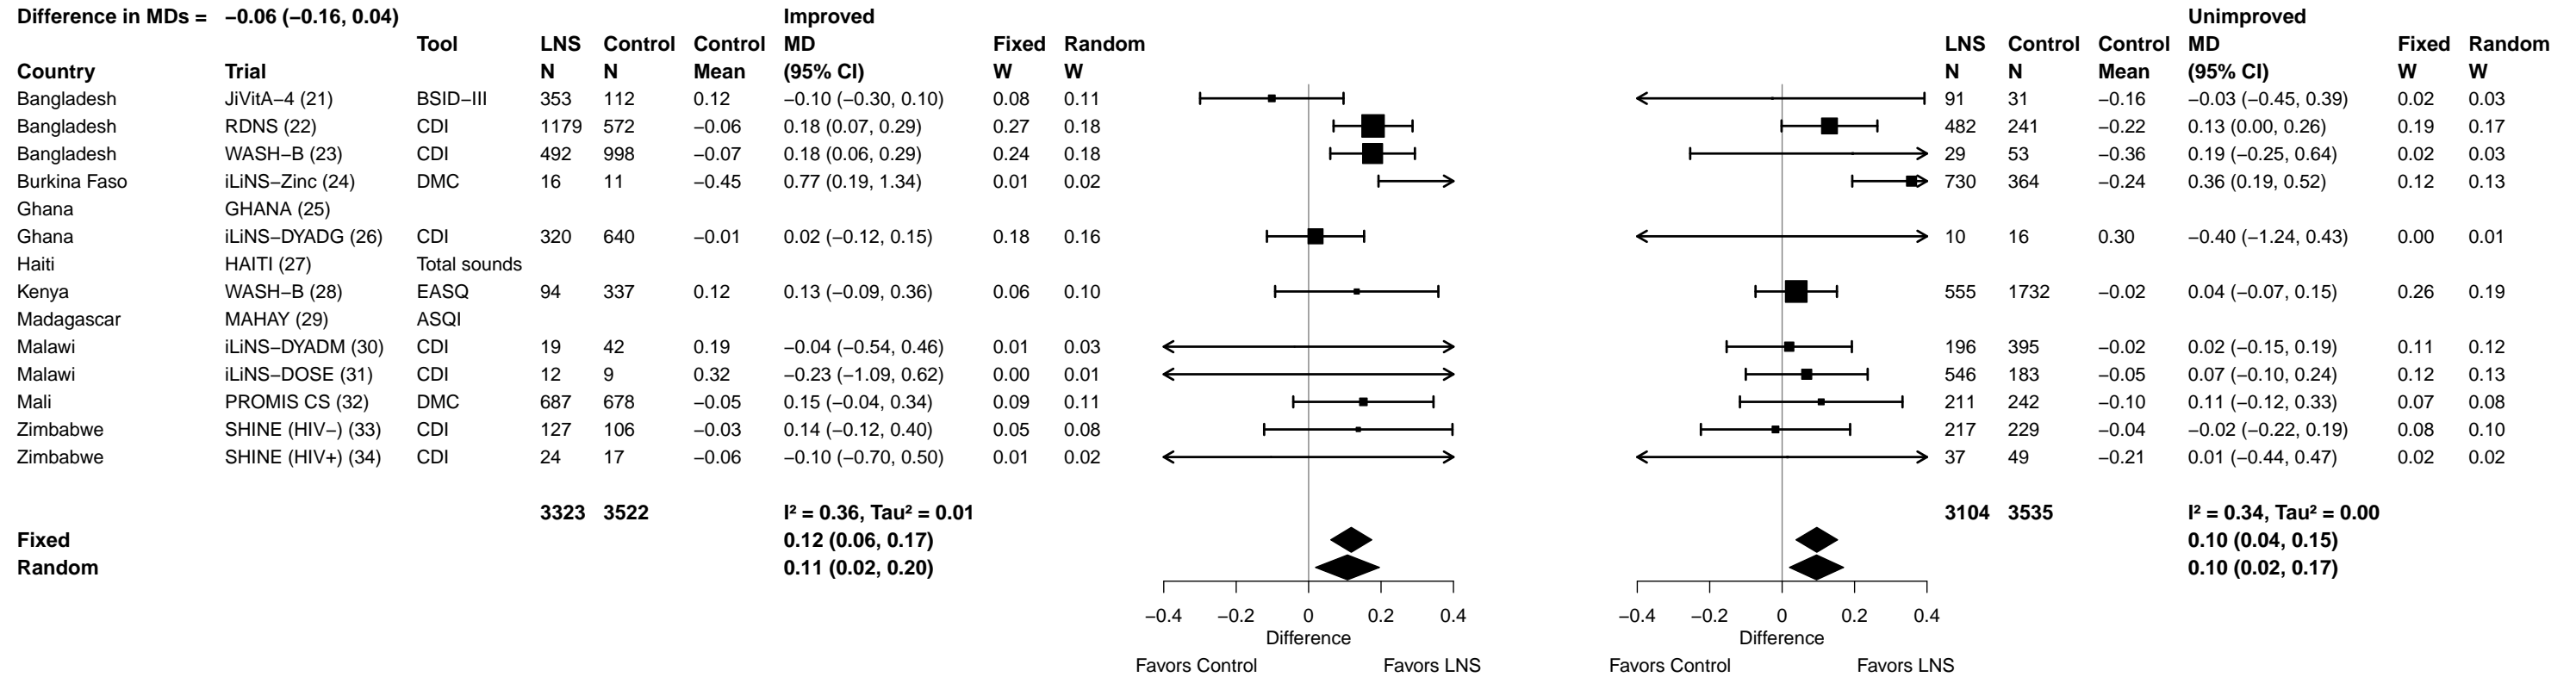



Supplemental figure 6A: Mean difference in language z-score

6A5: Stratified by Home environment

**P-for-interaction = 0.251**  
**Difference in MDs = 0.04 (-0.03, 0.11)**

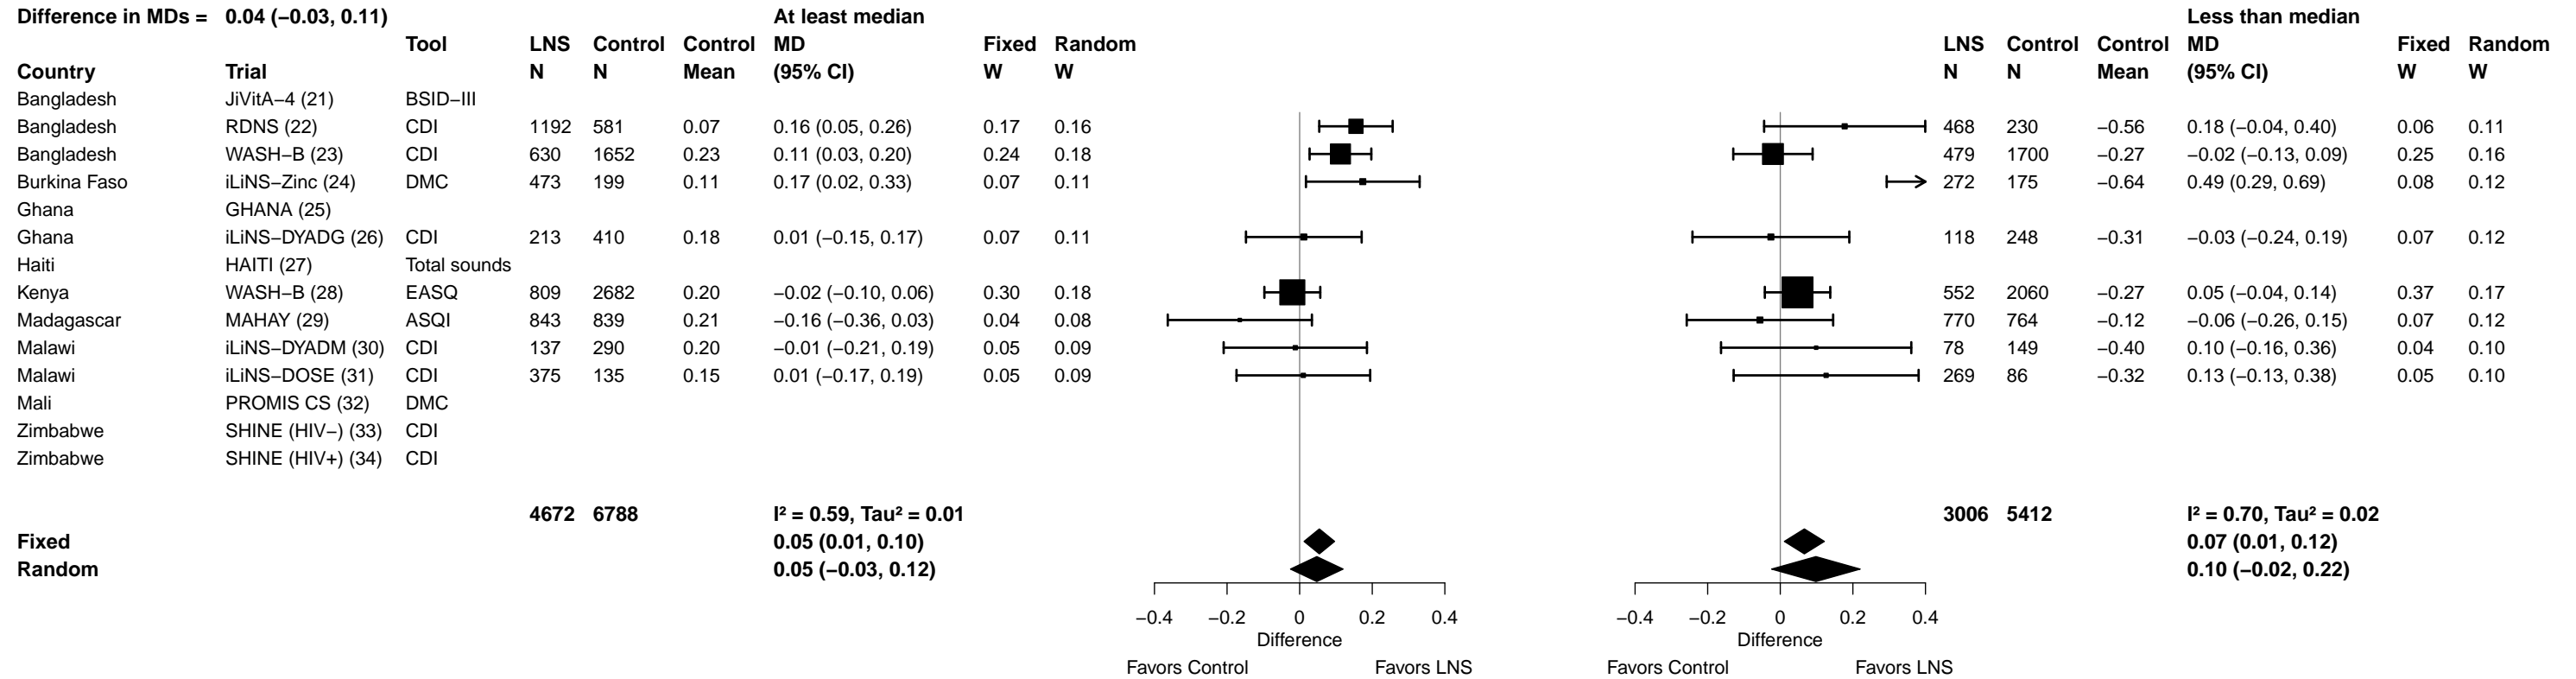

Supplemental figure 6A: Mean difference in language z-score

6A6: Stratified by Season at the time of assessment

P-for-interaction = 0.979  
 Difference in MDs = 0.00 (-0.07, 0.07)

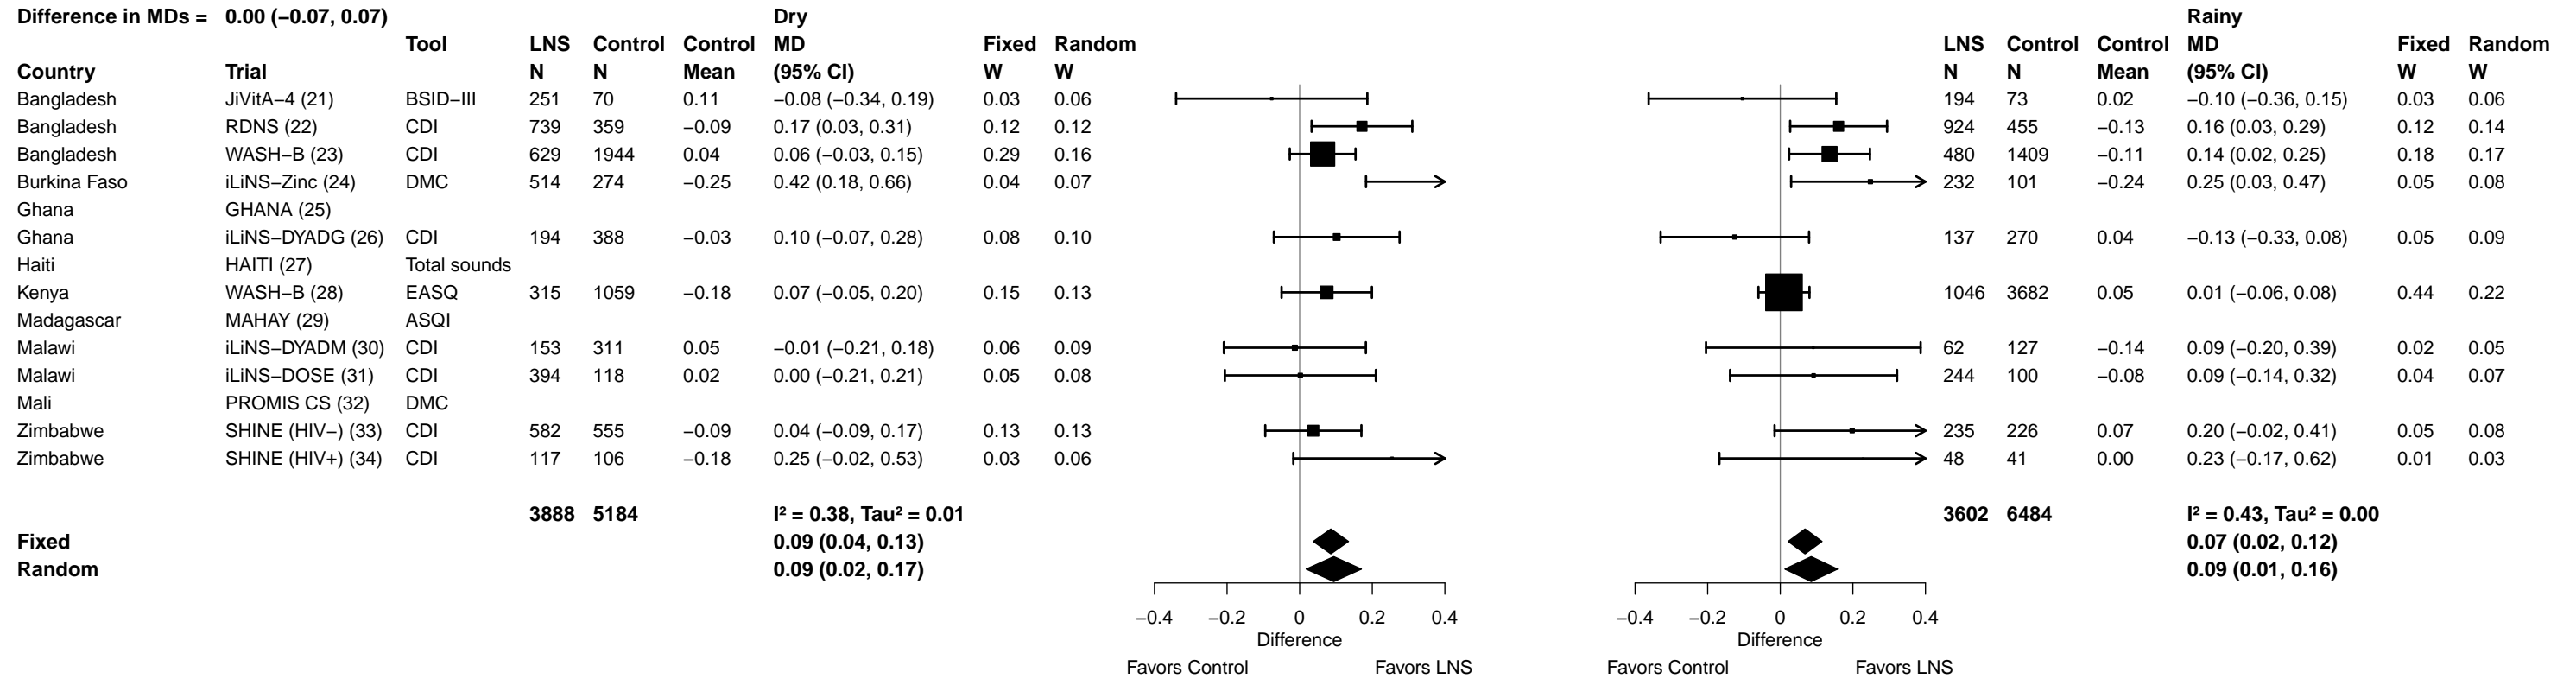

### Supplemental figure 6B: Language lowest decile prevalence ratio

#### 6B1: Stratified by Household socio-economic status

P-for-interaction = 0.227

Ratio of PRs = 0.90 (0.75, 1.07)

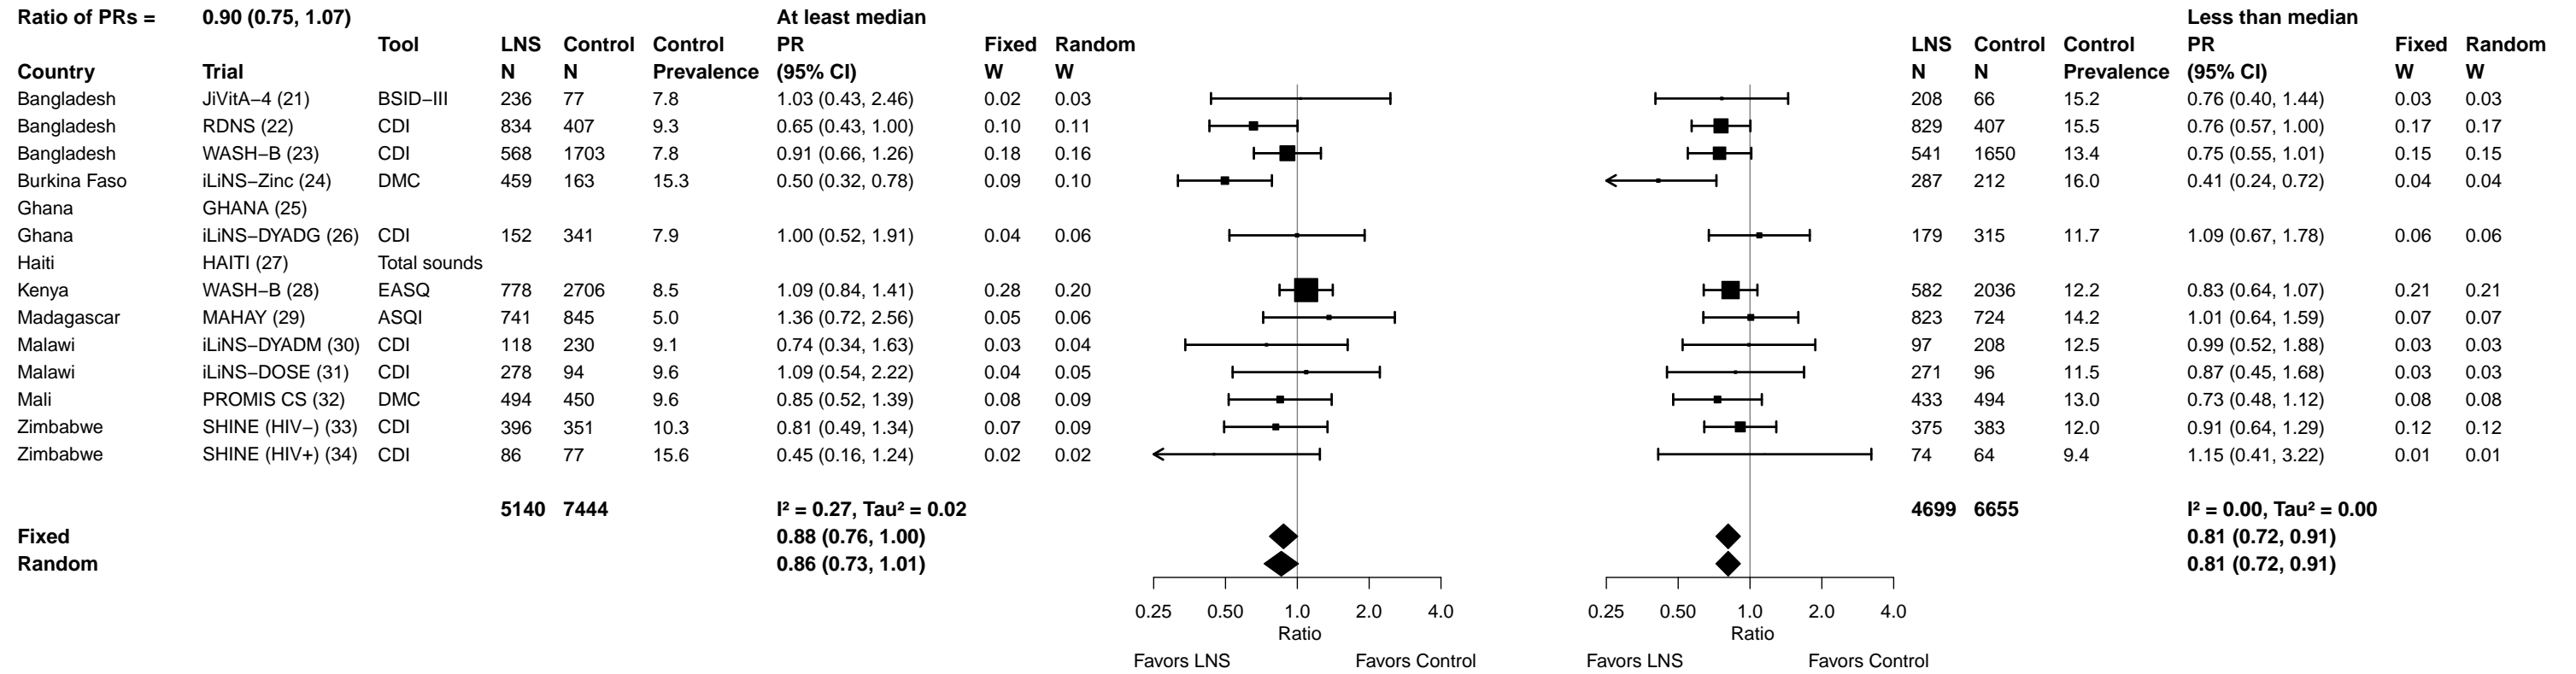

Supplemental figure 6B: Language lowest decile prevalence ratio

6B2: Stratified by Household food insecurity

P-for-interaction = 0.772  
 Ratio of PRs = 1.03 (0.85, 1.25)

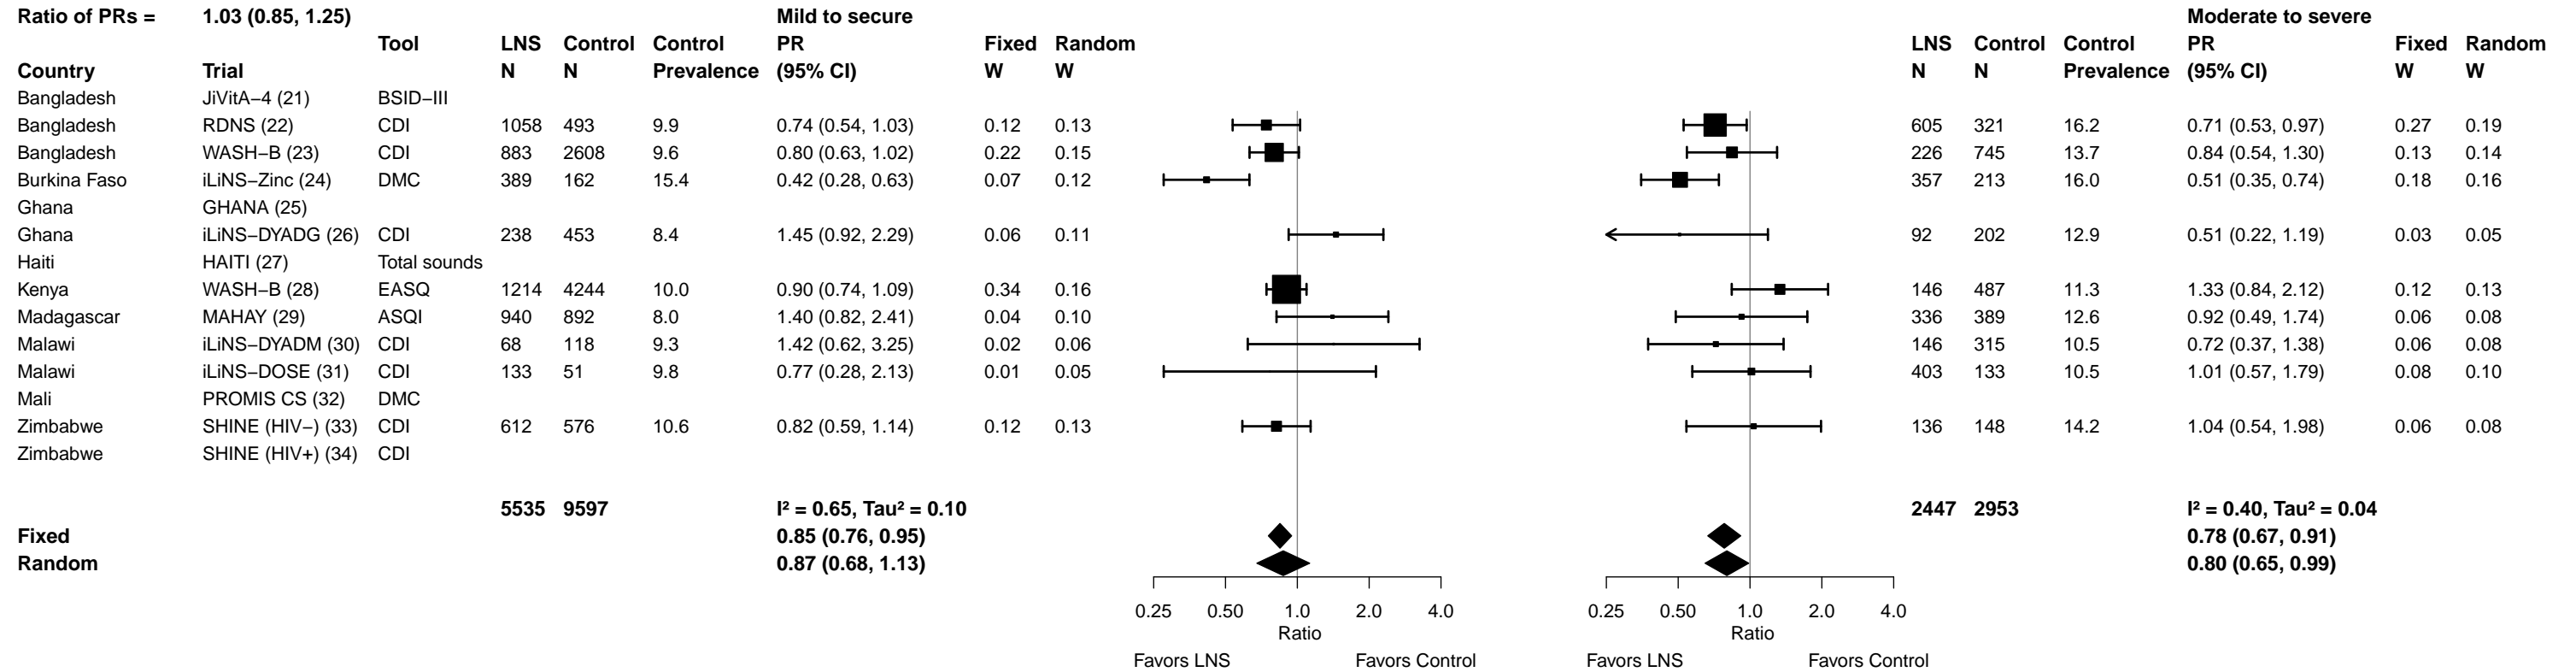

Supplemental figure 6B: Language lowest decile prevalence ratio

6B3: Stratified by Household source water quality

P-for-interaction = 0.707

Ratio of PRs = 0.95 (0.73, 1.24)

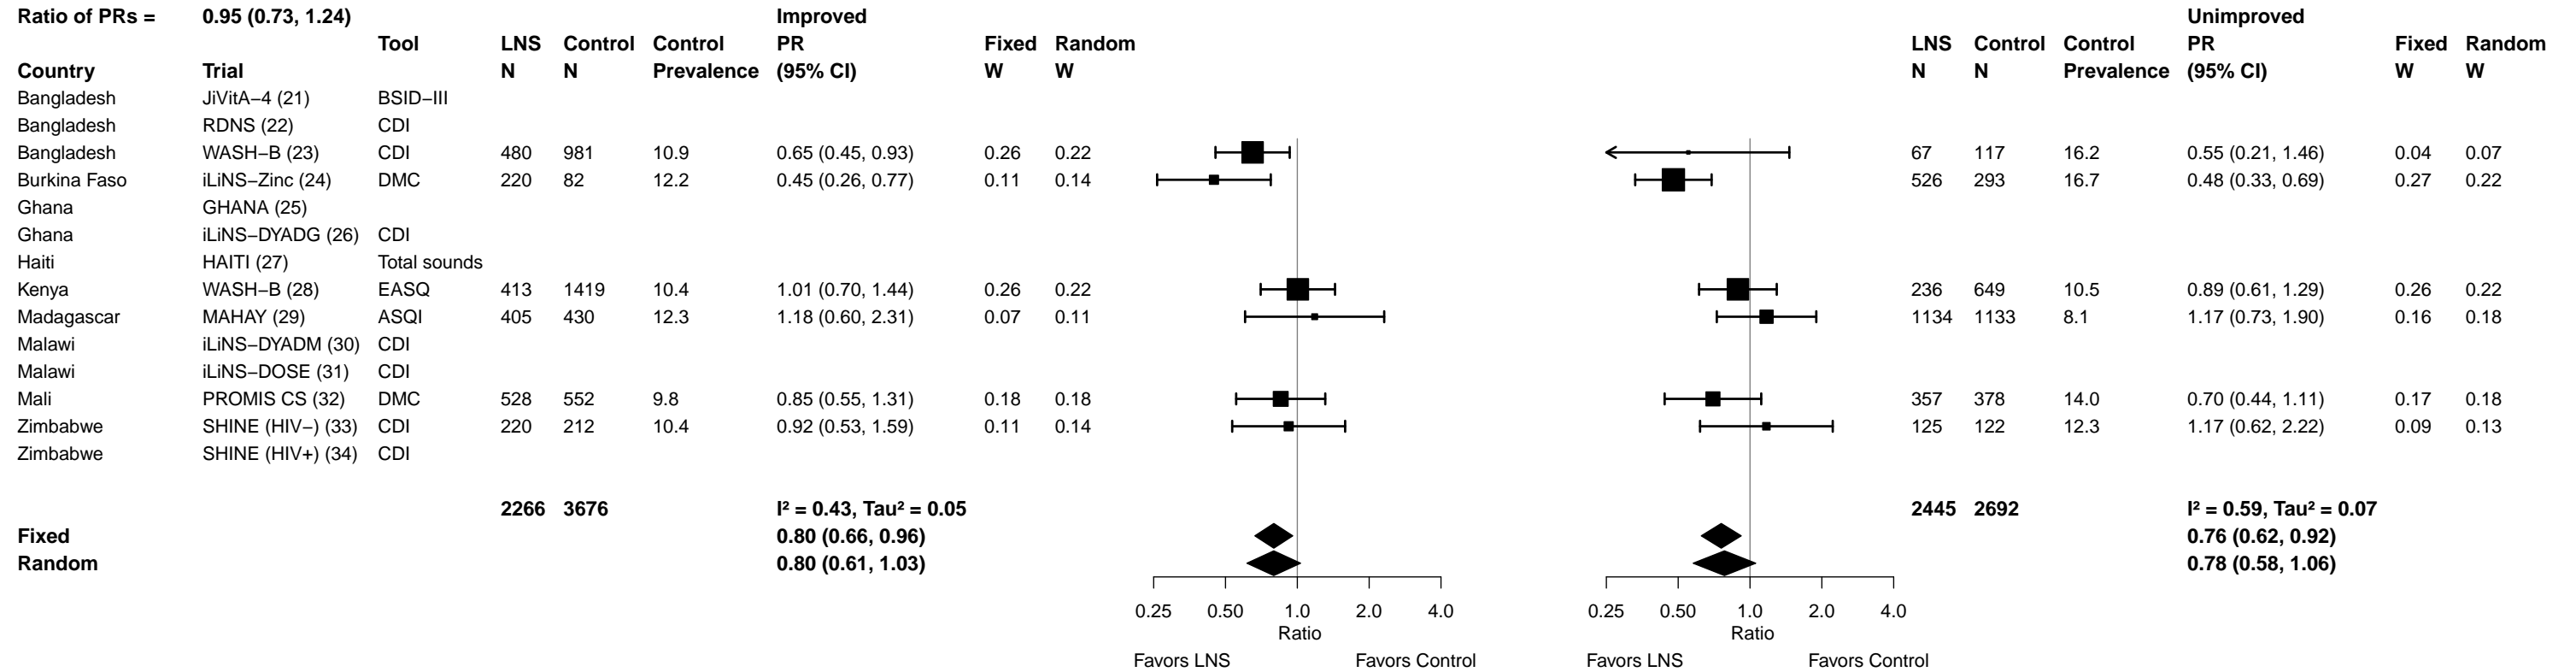

Supplemental figure 6B: Language lowest decile prevalence ratio

6B4: Stratified by Household sanitation

P-for-interaction = 0.821

Ratio of PRs = 1.04 (0.72, 1.50)

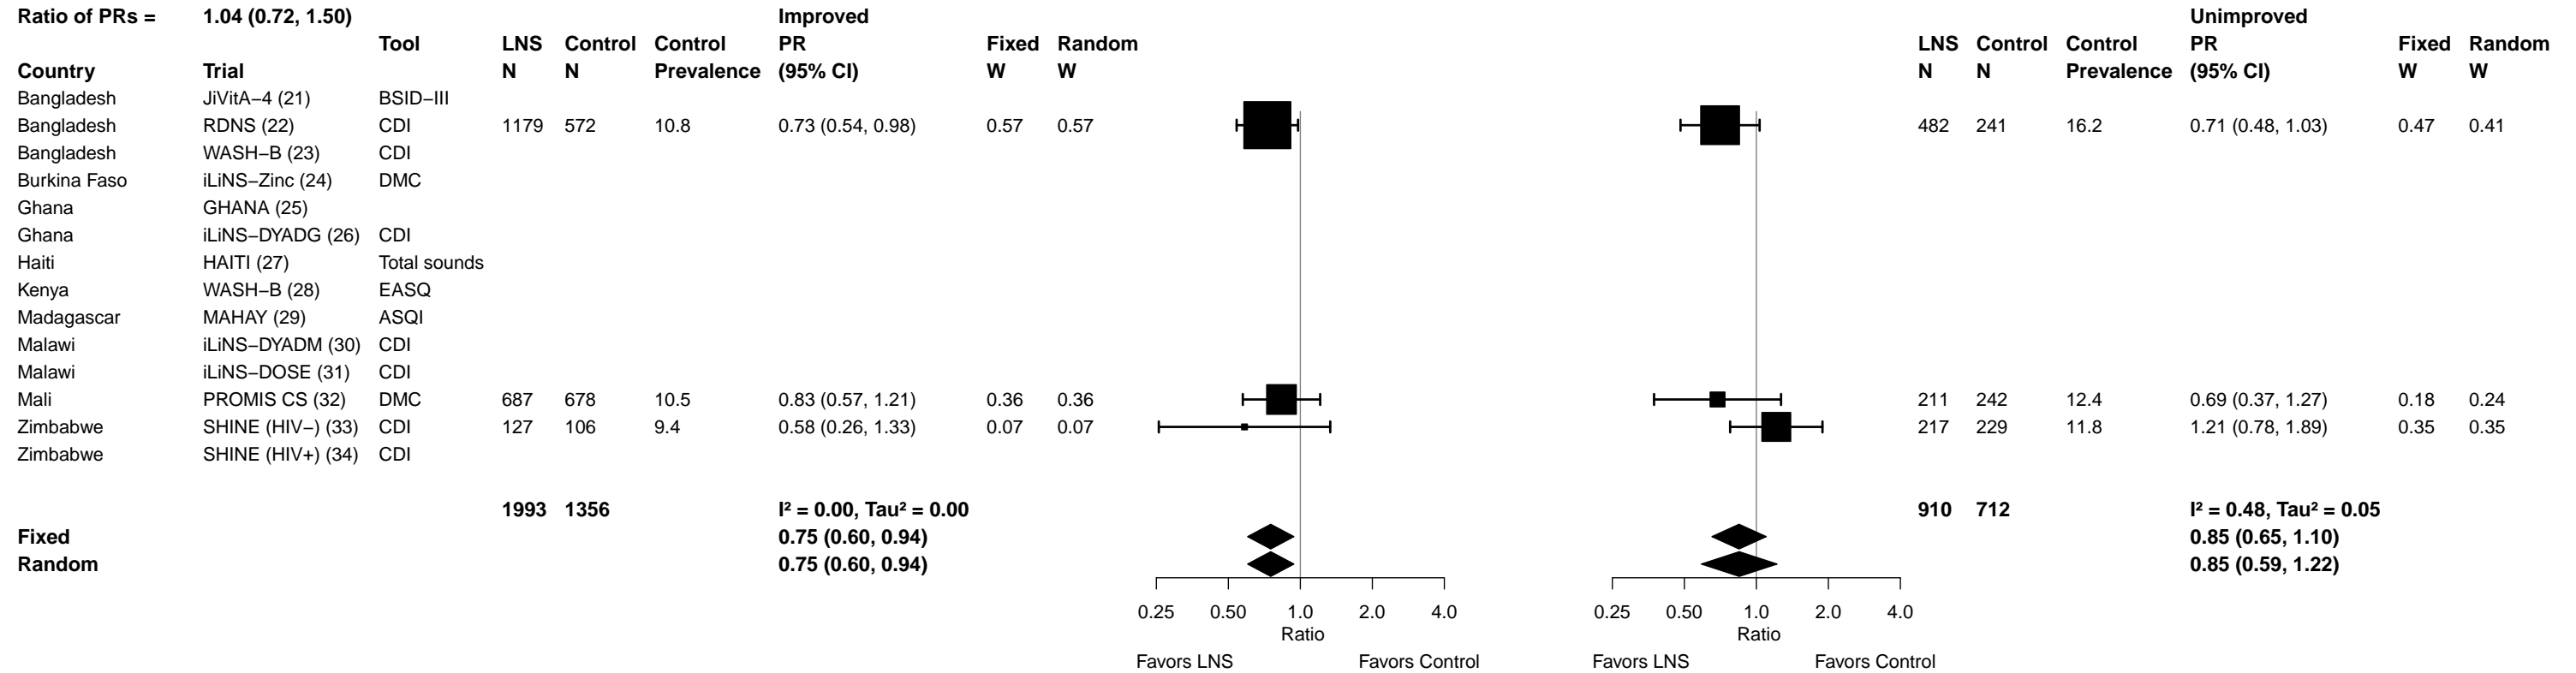

Supplemental figure 6B: Language lowest decile prevalence ratio

6B5: Stratified by Home environment

P-for-interaction = 0.592

Ratio of PRs = 0.95 (0.78, 1.16)

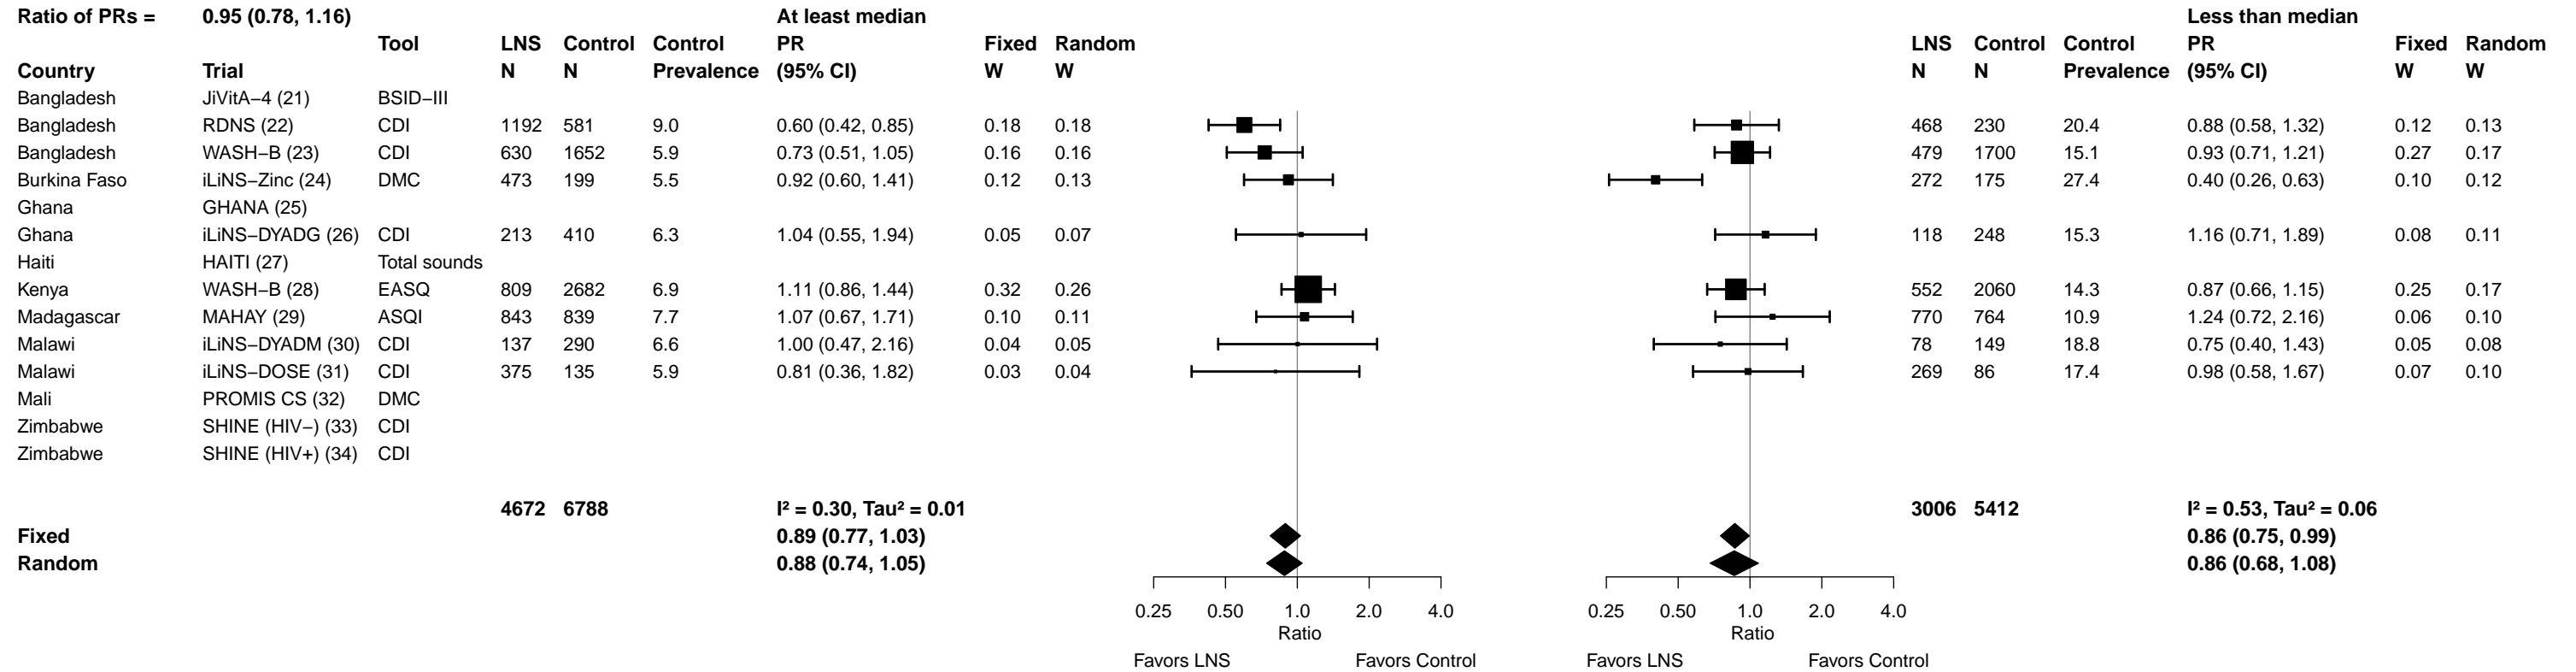

Supplemental figure 6B: Language lowest decile prevalence ratio

6B6: Stratified by Season at the time of assessment

P-for-interaction = 0.524

Ratio of PRs = 0.93 (0.76, 1.15)

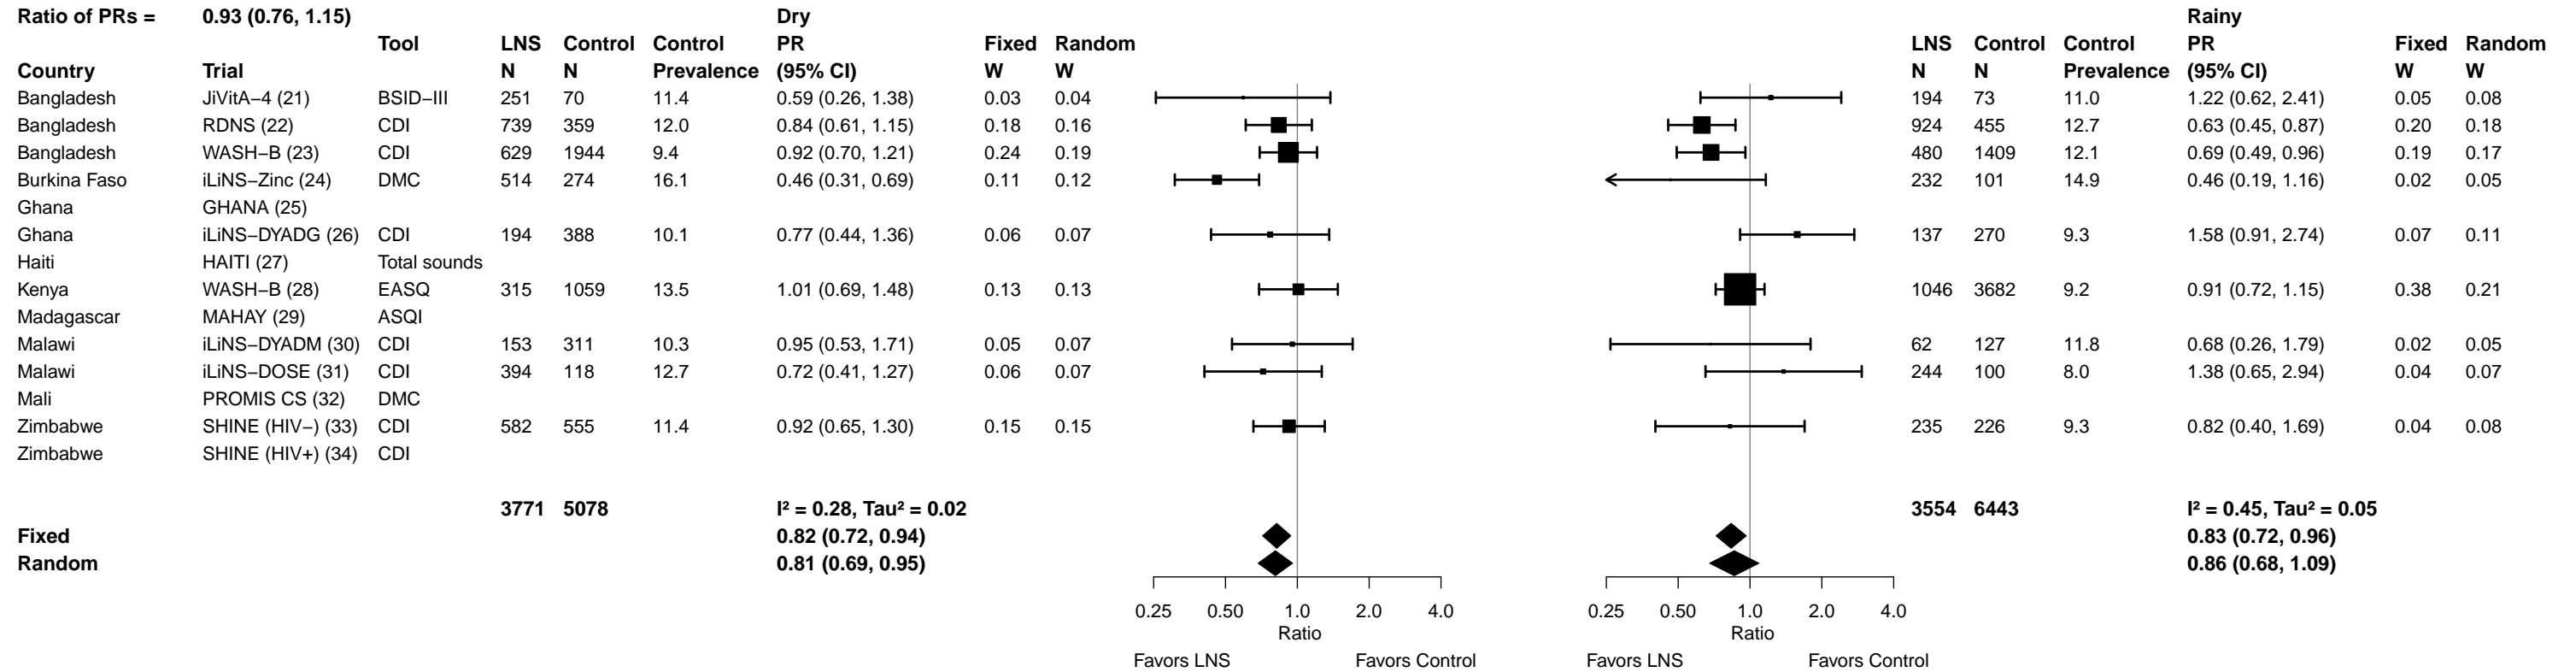



### Supplemental figure 6C: Language lowest decile prevalence difference

#### 6C1: Stratified by Household socio-economic status

**P-for-interaction = 0.078**  
**Difference in PDs = -0.02 (-0.03, 0.00)**

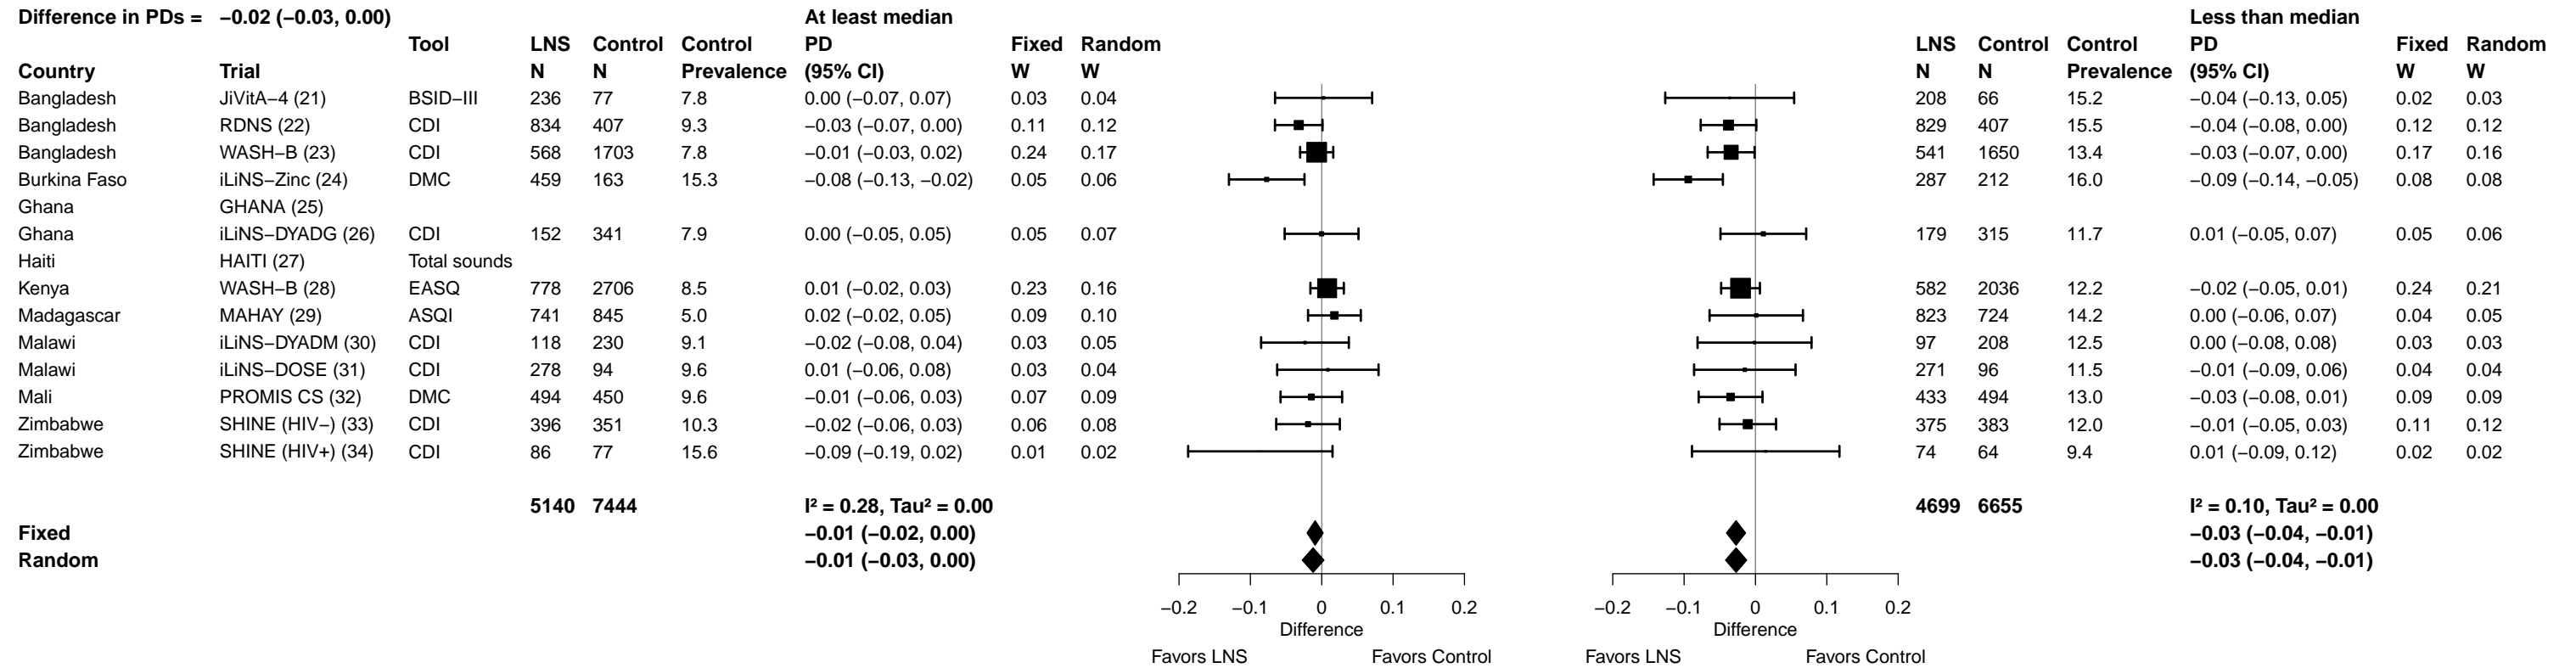

Supplemental figure 6C: Language lowest decile prevalence difference

6C2: Stratified by Household food insecurity

P-for-interaction = 0.269  
 Difference in PDs = -0.01 (-0.04, 0.01)

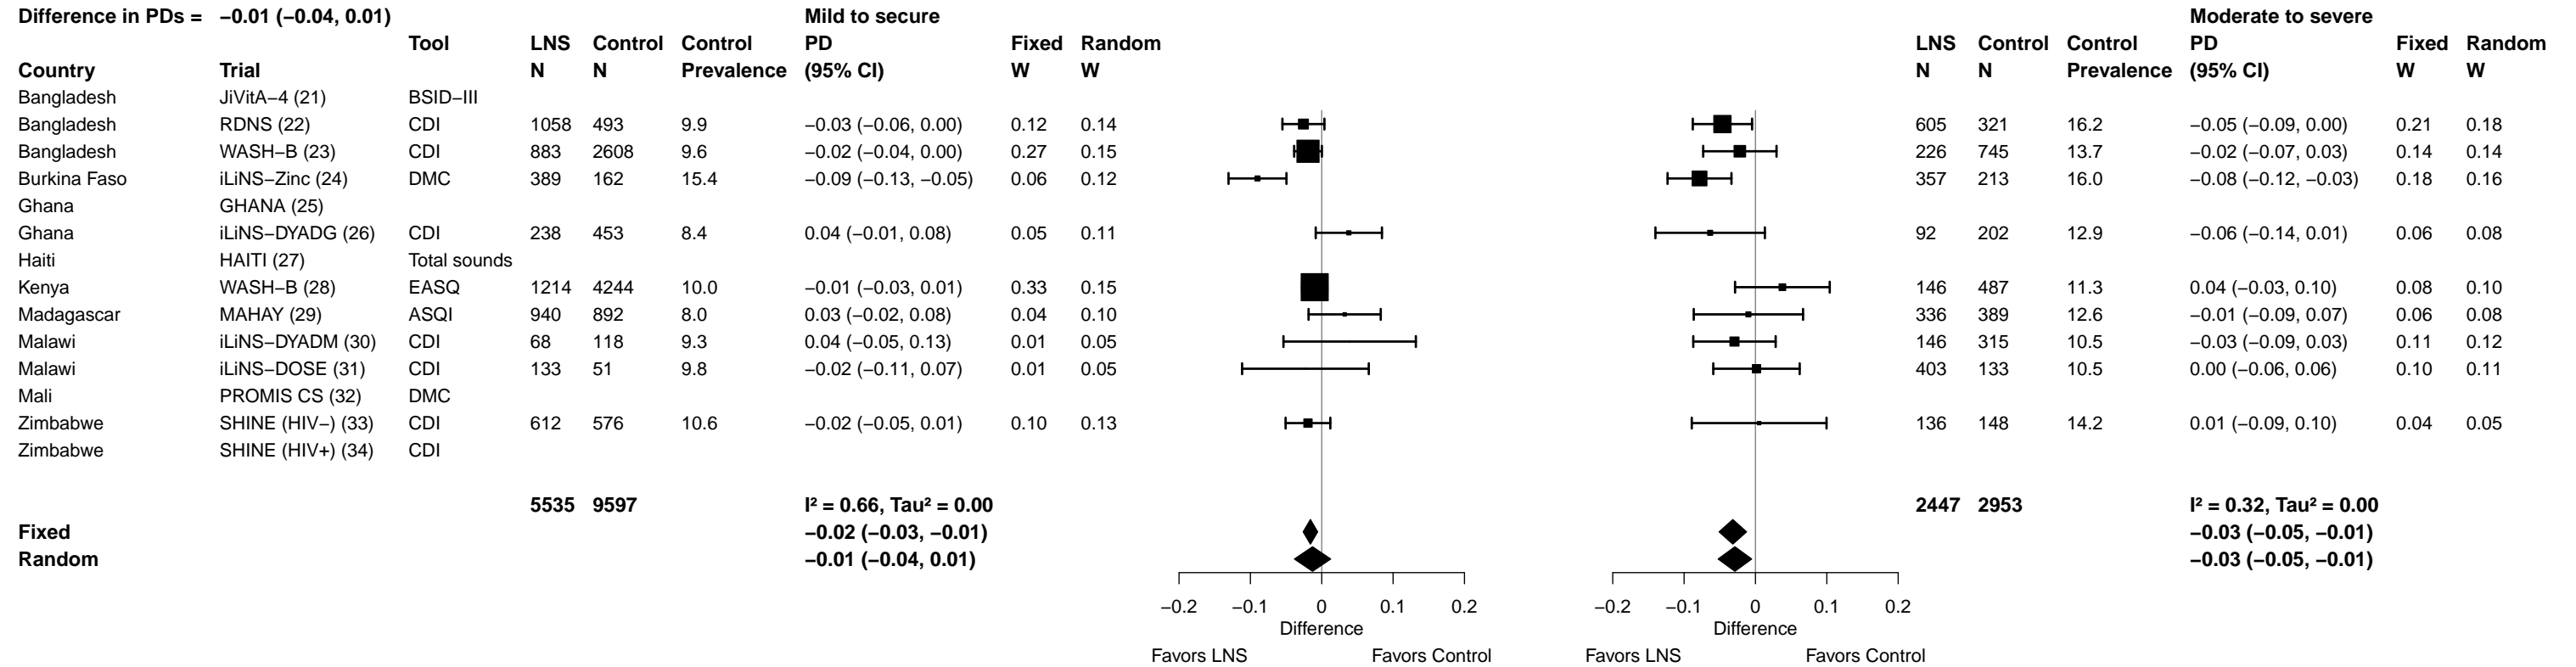

Supplemental figure 6C: Language lowest decile prevalence difference

6C3: Stratified by Household source water quality

**P-for-interaction = 0.321**  
**Difference in PDs = -0.01 (-0.04, 0.01)**

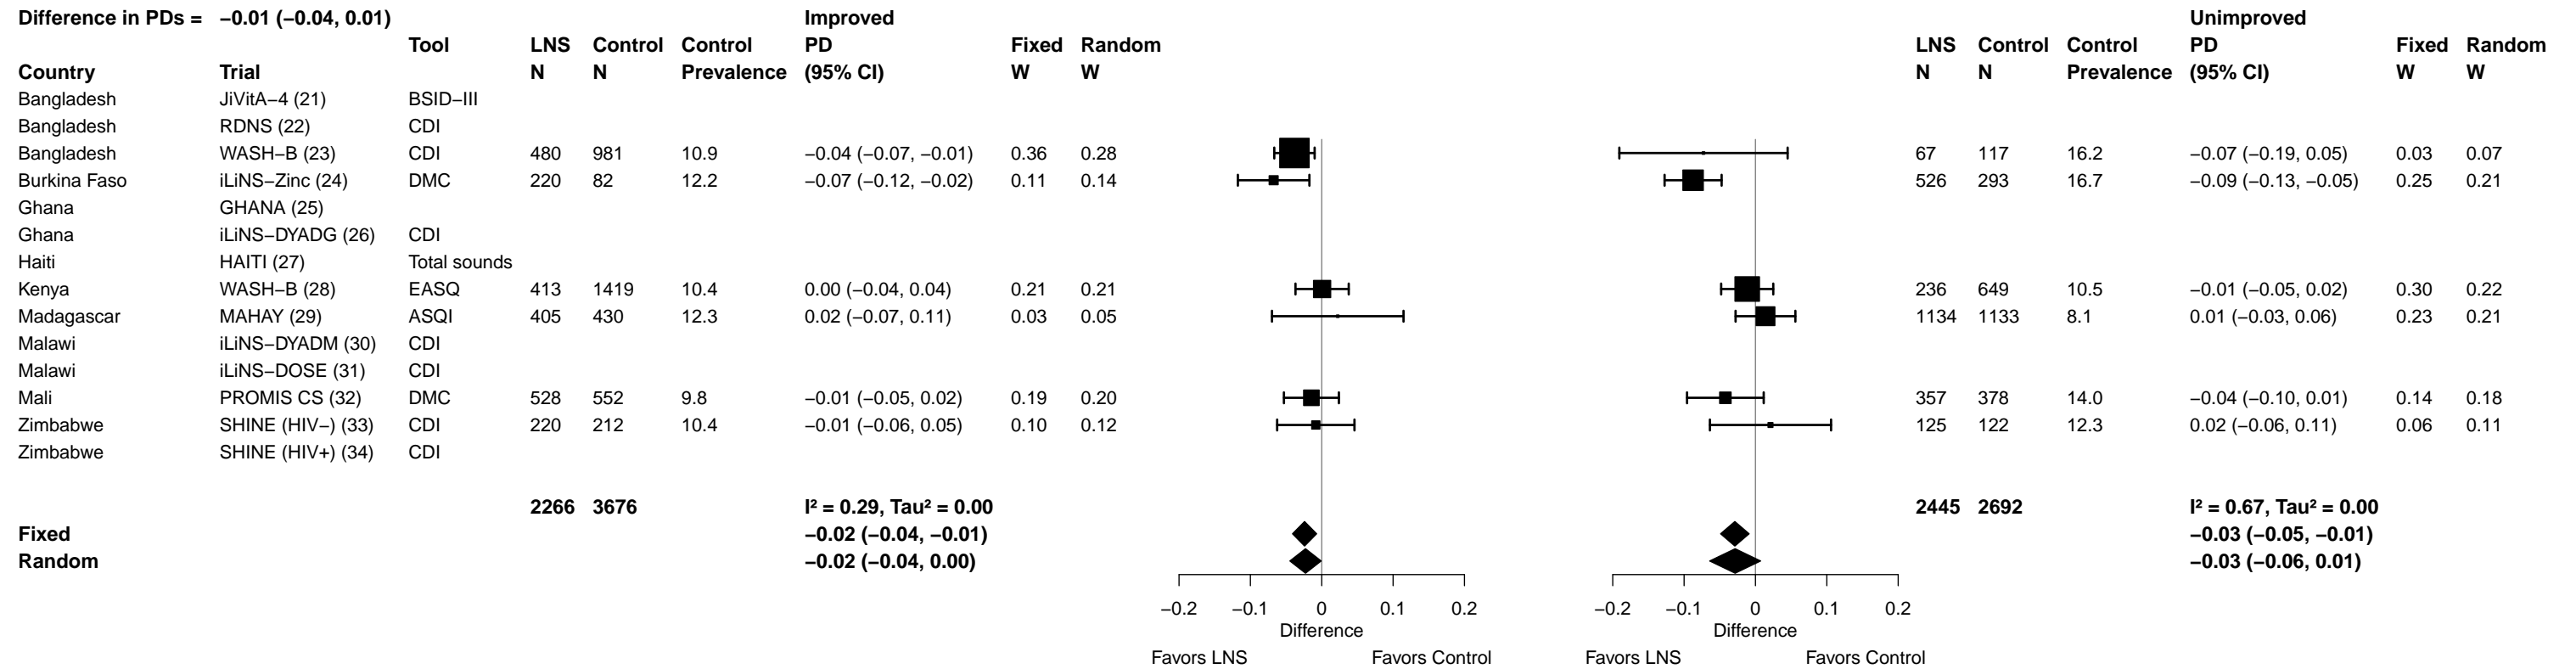

Supplemental figure 6C: Language lowest decile prevalence difference

6C4: Stratified by Household sanitation

P-for-interaction = 0.848  
 Difference in PDs = 0.00 (-0.04, 0.04)

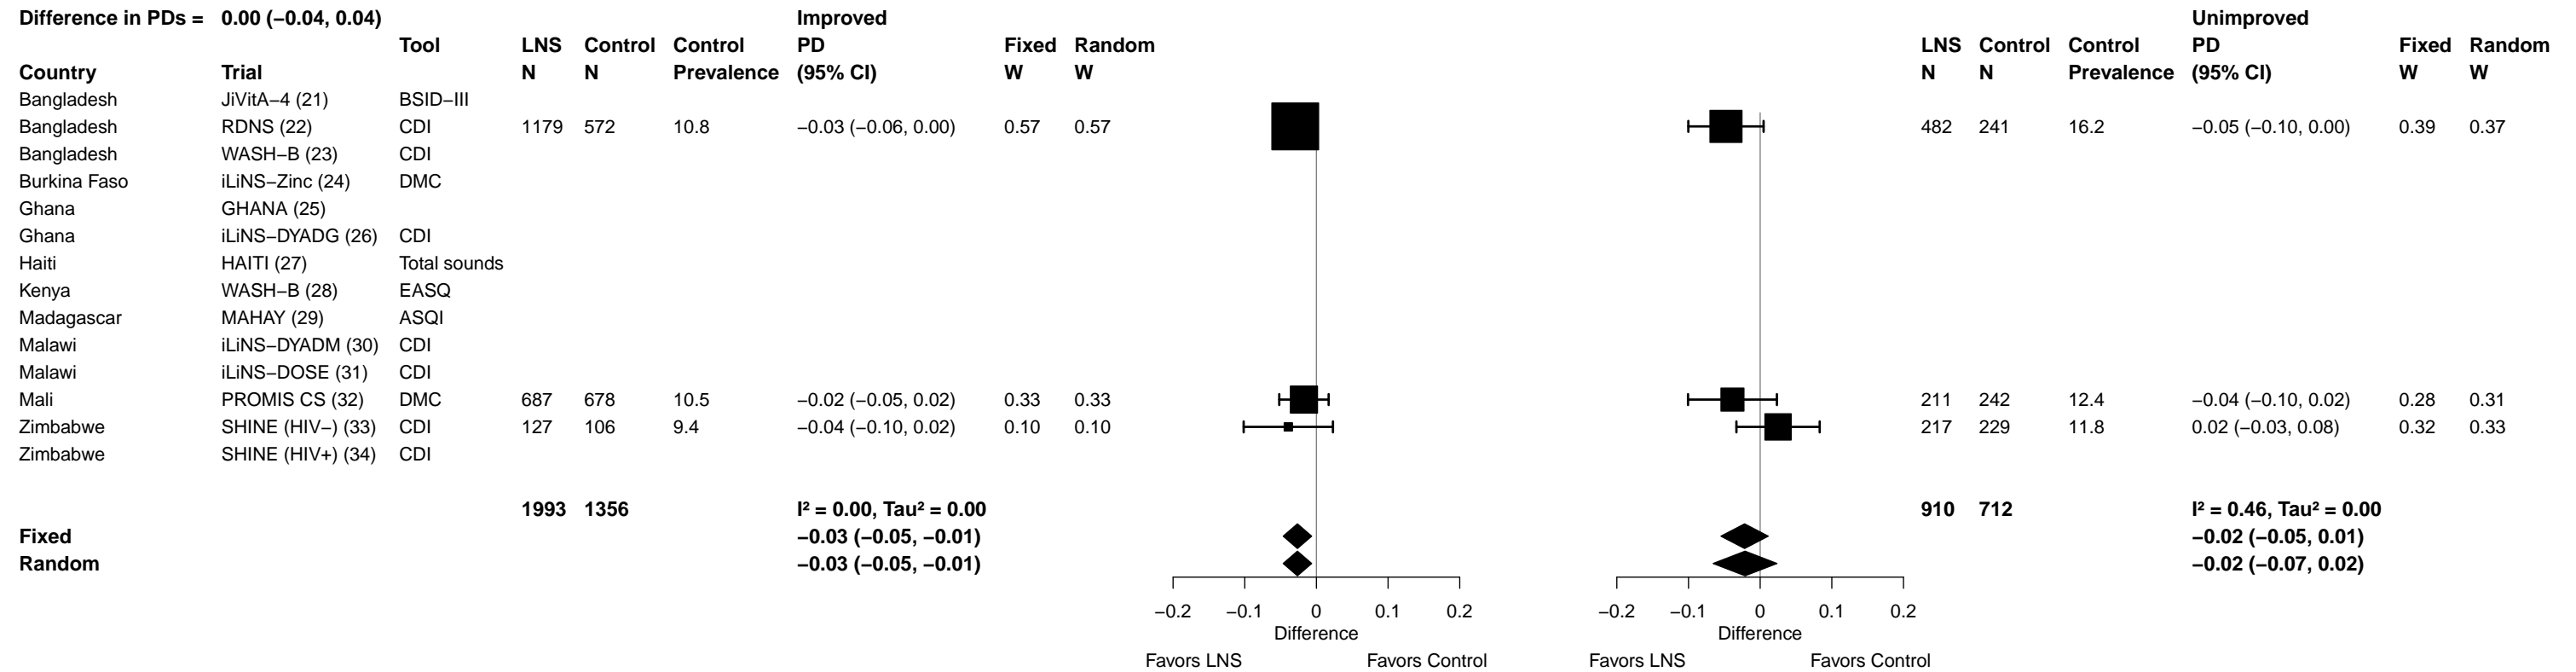

Supplemental figure 6C: Language lowest decile prevalence difference

6C5: Stratified by Home environment

**P-for-interaction = 0.364**  
**Difference in PDs = -0.01 (-0.03, 0.01)**

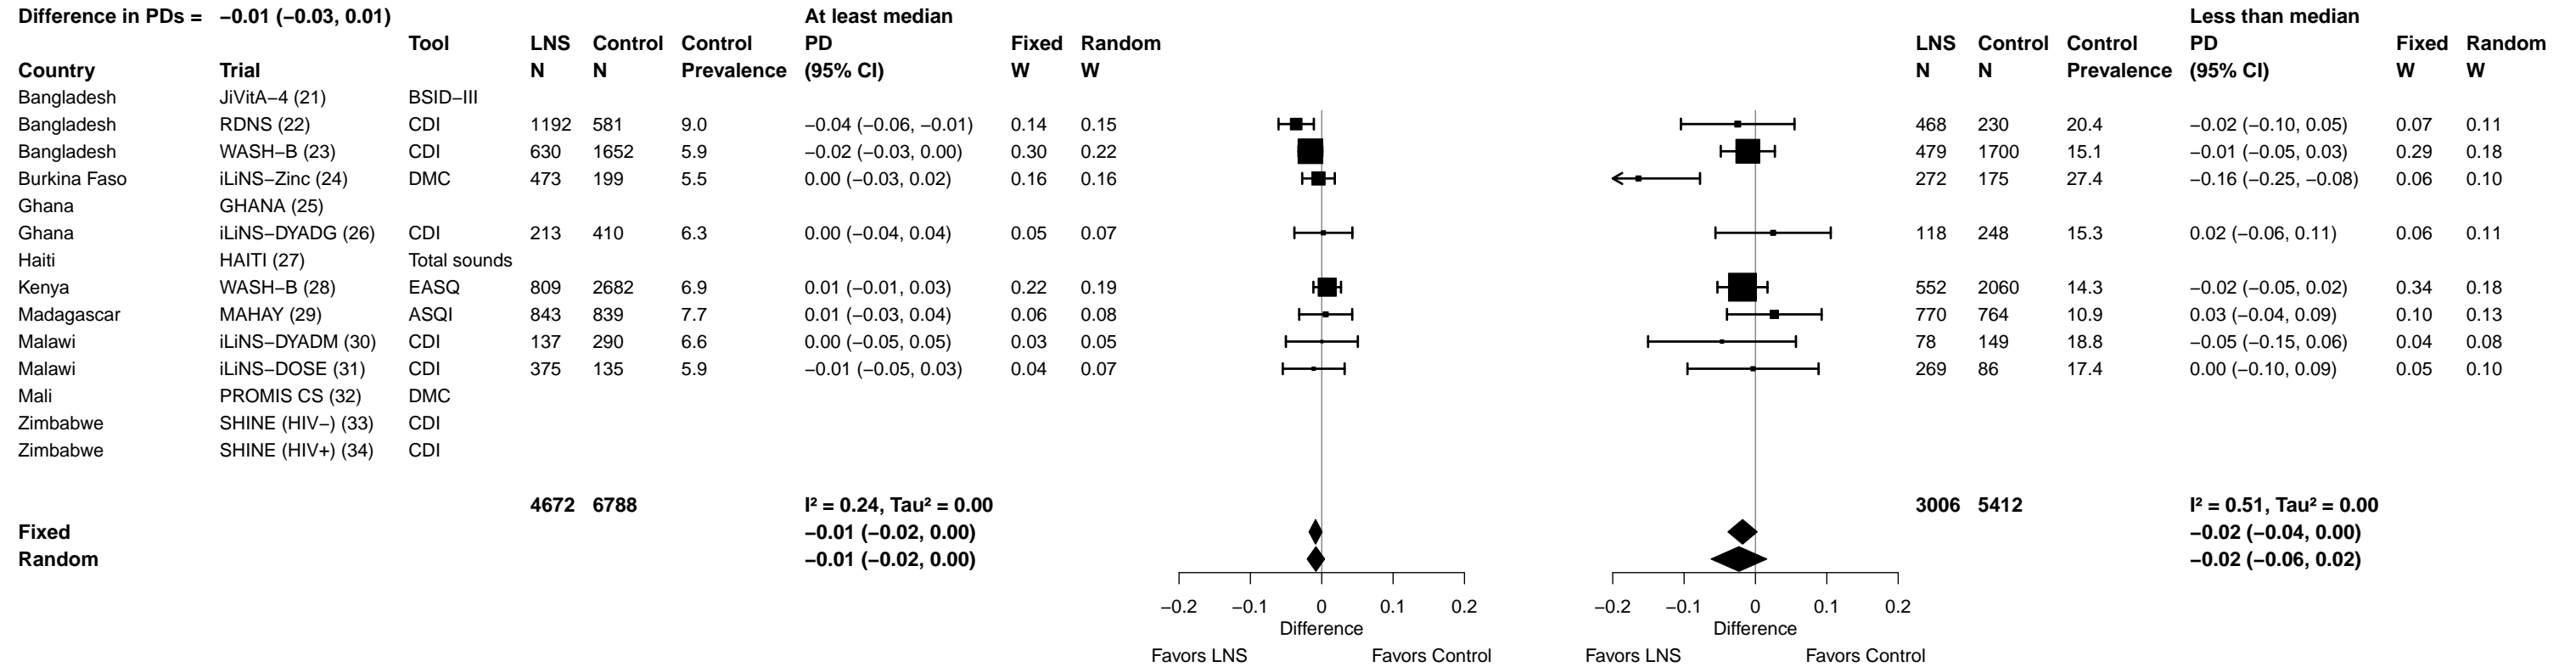

Supplemental figure 6C: Language lowest decile prevalence difference

6C6: Stratified by Season at the time of assessment

P-for-interaction = 0.556

Difference in PDs = -0.01 (-0.03, 0.01)

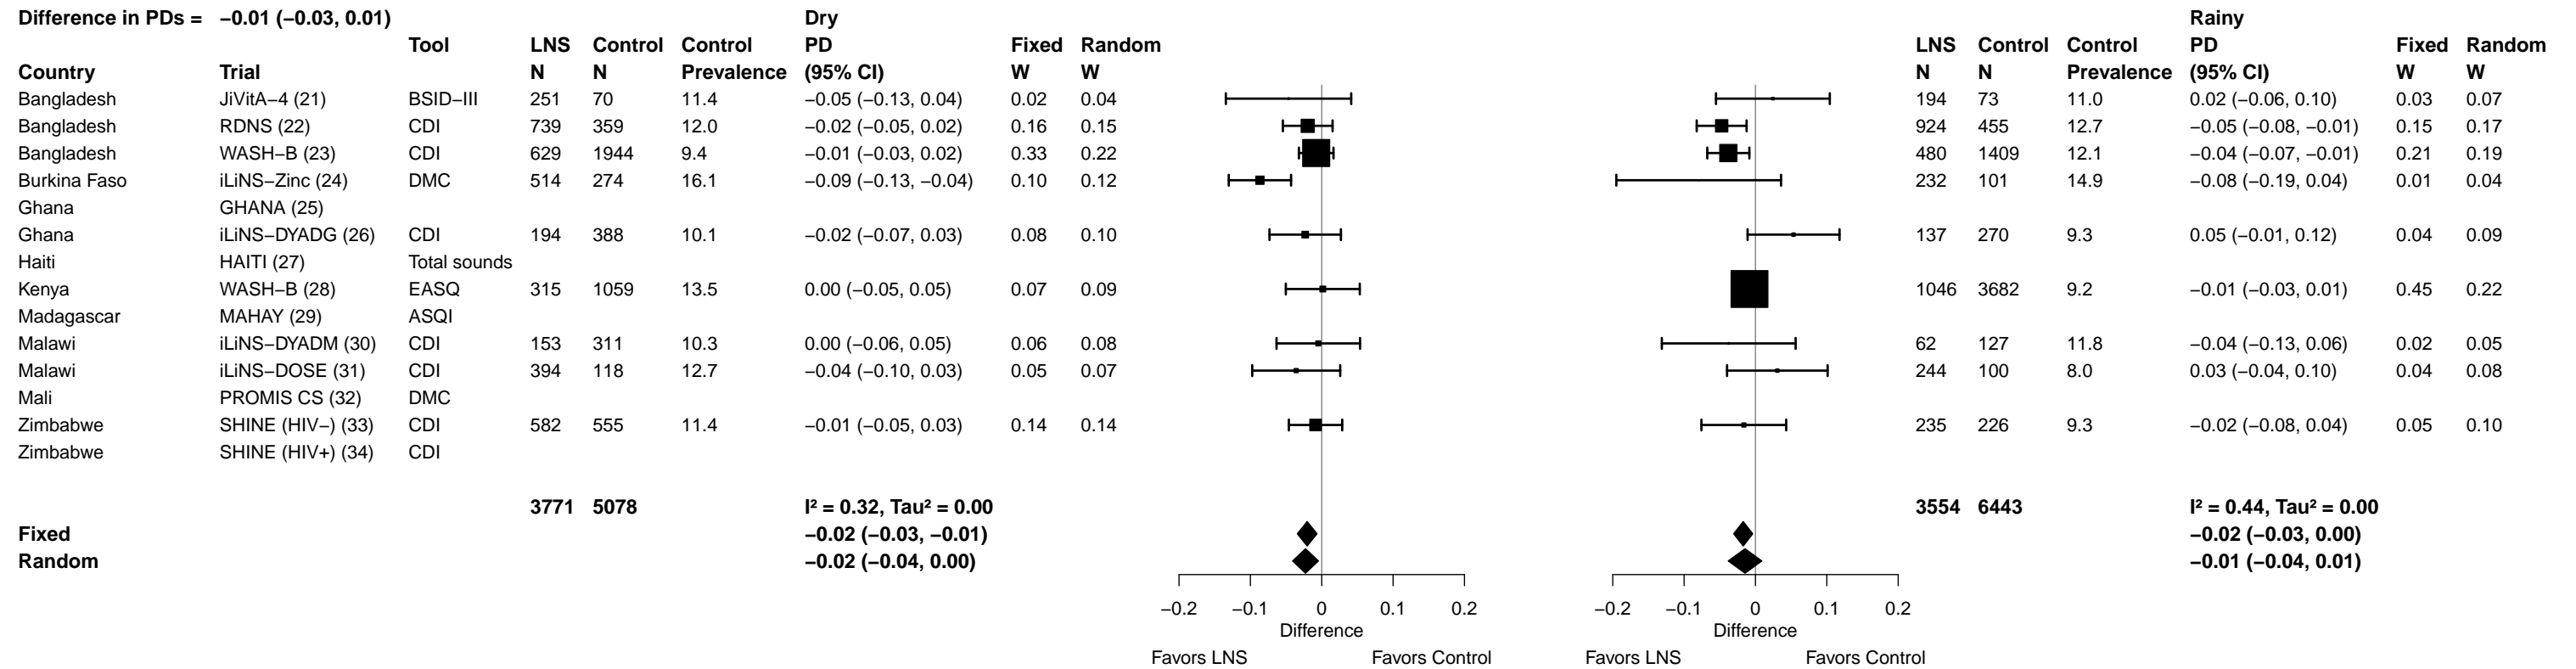

### Supplemental figure 6D: Mean difference in social-emotional z-score

#### 6D1: Stratified by Household socio-economic status

**P-for-interaction = 0.982**  
**Difference in MDs = 0.00 (-0.06, 0.06)**

| Country       | Trial             | Tool | LNS<br>N    | Control<br>N | Control<br>Mean | At least median<br>MD<br>(95% CI)                   | Fixed<br>W | Random<br>W |  | LNS<br>N    | Control<br>N | Control<br>Mean | Less than median<br>MD<br>(95% CI)                  | Fixed<br>W | Random<br>W |
|---------------|-------------------|------|-------------|--------------|-----------------|-----------------------------------------------------|------------|-------------|--|-------------|--------------|-----------------|-----------------------------------------------------|------------|-------------|
|               |                   |      |             |              |                 |                                                     |            |             |  |             |              |                 |                                                     |            |             |
| Bangladesh    | JiVitA-4 (21)     |      |             |              |                 |                                                     |            |             |  |             |              |                 |                                                     |            |             |
| Bangladesh    | RDNS (22)         | DMC  | 830         | 407          | 0.00            | 0.09 (-0.06, 0.23)                                  | 0.09       | 0.11        |  | 827         | 408          | -0.07           | 0.04 (-0.09, 0.16)                                  | 0.14       | 0.14        |
| Bangladesh    | WASH-B (23)       | EASQ | 545         | 1659         | 0.11            | 0.09 (-0.01, 0.19)                                  | 0.19       | 0.12        |  | 521         | 1607         | -0.17           | 0.16 (0.05, 0.26)                                   | 0.20       | 0.17        |
| Burkina Faso  | iLiNS-Zinc (24)   | DMC  | 459         | 163          | -0.25           | 0.41 (0.14, 0.69)                                   | 0.03       | 0.06        |  | 287         | 212          | -0.22           | 0.28 (0.05, 0.51)                                   | 0.04       | 0.05        |
| Ghana         | GHANA (25)        |      |             |              |                 |                                                     |            |             |  |             |              |                 |                                                     |            |             |
| Ghana         | iLiNS-DYADG (26)  | PSED | 153         | 341          | 0.00            | 0.00 (-0.19, 0.19)                                  | 0.05       | 0.09        |  | 179         | 314          | 0.00            | 0.01 (-0.17, 0.20)                                  | 0.06       | 0.08        |
| Haiti         | HAITI (27)        |      |             |              |                 |                                                     |            |             |  |             |              |                 |                                                     |            |             |
| Kenya         | WASH-B (28)       | EASQ | 778         | 2706         | 0.06            | 0.01 (-0.07, 0.08)                                  | 0.32       | 0.13        |  | 582         | 2036         | -0.08           | 0.02 (-0.07, 0.11)                                  | 0.25       | 0.20        |
| Madagascar    | MAHAY (29)        | ASQI | 741         | 845          | 0.20            | -0.06 (-0.24, 0.12)                                 | 0.06       | 0.09        |  | 823         | 724          | -0.16           | -0.04 (-0.26, 0.18)                                 | 0.04       | 0.05        |
| Malawi        | iLiNS-DYADM (30)  | PSED | 118         | 230          | 0.00            | 0.08 (-0.15, 0.31)                                  | 0.04       | 0.07        |  | 97          | 207          | -0.02           | -0.06 (-0.29, 0.18)                                 | 0.04       | 0.05        |
| Malawi        | iLiNS-DOSE (31)   | PSED | 278         | 94           | -0.02           | 0.00 (-0.23, 0.22)                                  | 0.04       | 0.07        |  | 270         | 96           | 0.01            | 0.06 (-0.18, 0.30)                                  | 0.04       | 0.05        |
| Mali          | PROMIS CS (32)    | DMC  | 494         | 450          | 0.03            | 0.05 (-0.14, 0.25)                                  | 0.05       | 0.08        |  | 433         | 494          | -0.17           | 0.23 (0.03, 0.42)                                   | 0.05       | 0.07        |
| Zimbabwe      | SHINE (HIV-) (33) | MDAT | 406         | 359          | -0.07           | 0.22 (0.08, 0.35)                                   | 0.10       | 0.11        |  | 389         | 391          | -0.08           | 0.07 (-0.07, 0.21)                                  | 0.11       | 0.11        |
| Zimbabwe      | SHINE (HIV+) (34) | MDAT | 91          | 78           | -0.23           | 0.45 (0.18, 0.72)                                   | 0.03       | 0.06        |  | 74          | 67           | -0.07           | 0.19 (-0.12, 0.49)                                  | 0.02       | 0.03        |
|               |                   |      | <b>4893</b> | <b>7332</b>  |                 | <b>I<sup>2</sup> = 0.57, Tau<sup>2</sup> = 0.01</b> |            |             |  | <b>4482</b> | <b>6556</b>  |                 | <b>I<sup>2</sup> = 0.24, Tau<sup>2</sup> = 0.00</b> |            |             |
| <b>Fixed</b>  |                   |      |             |              |                 | <b>0.07 (0.03, 0.12)</b>                            |            |             |  |             |              |                 | <b>0.08 (0.03, 0.12)</b>                            |            |             |
| <b>Random</b> |                   |      |             |              |                 | <b>0.10 (0.01, 0.19)</b>                            |            |             |  |             |              |                 | <b>0.08 (0.02, 0.13)</b>                            |            |             |

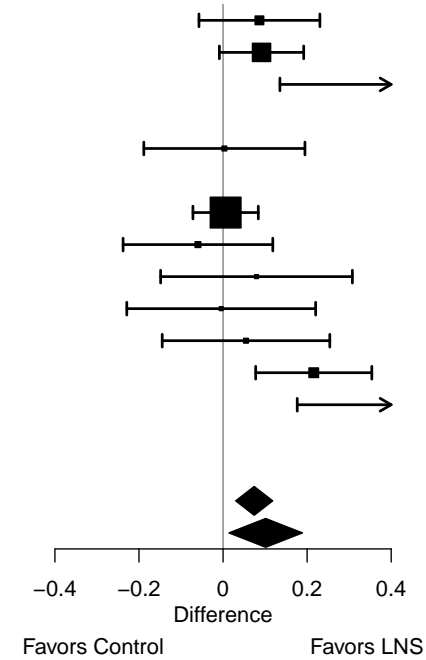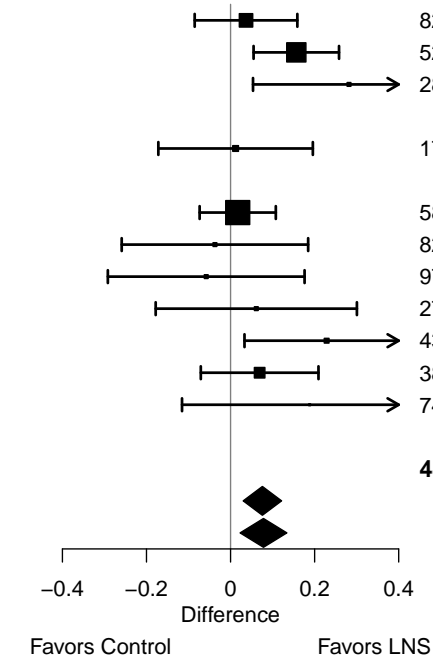

Supplemental figure 6D: Mean difference in social-emotional z-score

6D2: Stratified by Household food insecurity

P-for-interaction = 0.347  
 Difference in MDs = -0.03 (-0.10, 0.04)

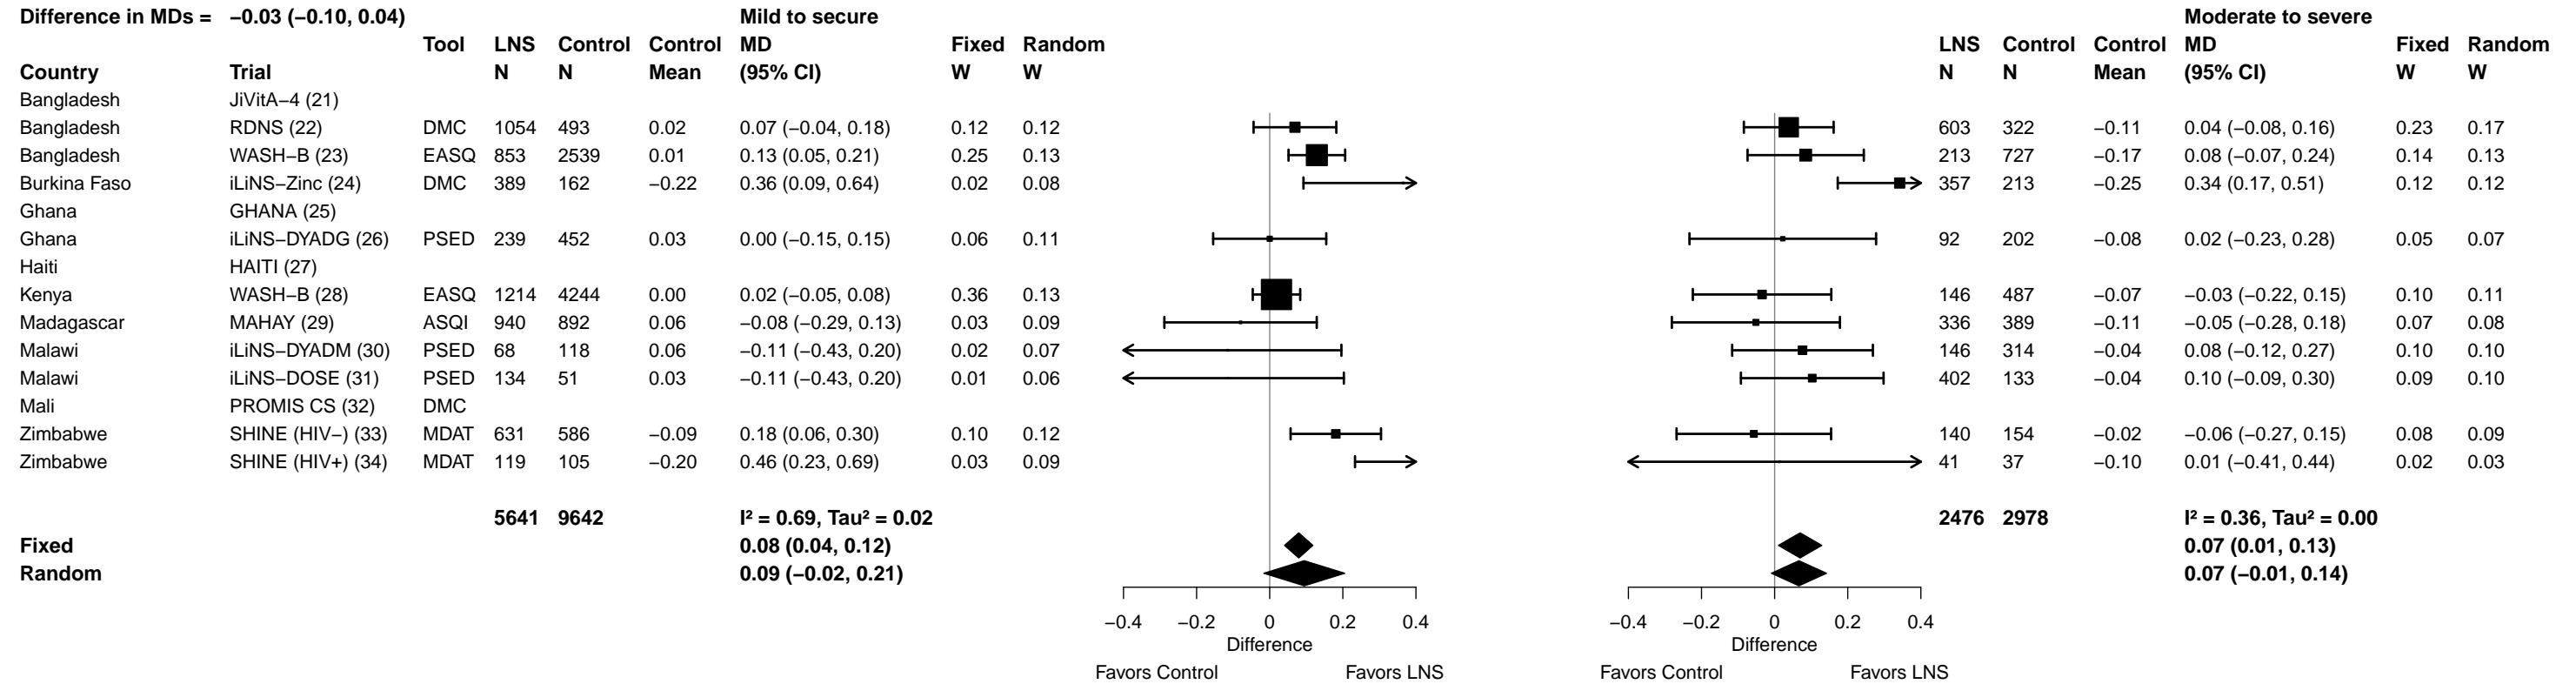



Supplemental figure 6D: Mean difference in social-emotional z-score

6D3: Stratified by Household source water quality

P-for-interaction = 0.939  
 Difference in MDs = 0.00 (-0.09, 0.10)

| Country      | Trial             | Tool | LNS N | Control N | Control Mean | Improved MD (95% CI) | Fixed W | Random W |  | LNS N | Control N | Control Mean | Unimproved MD (95% CI) | Fixed W | Random W |
|--------------|-------------------|------|-------|-----------|--------------|----------------------|---------|----------|--|-------|-----------|--------------|------------------------|---------|----------|
|              |                   |      |       |           |              |                      |         |          |  |       |           |              |                        |         |          |
| Bangladesh   | JiVitA-4 (21)     |      |       |           |              |                      |         |          |  |       |           |              |                        |         |          |
| Bangladesh   | RDNS (22)         | DMC  |       |           |              |                      |         |          |  |       |           |              |                        |         |          |
| Bangladesh   | WASH-B (23)       | EASQ | 461   | 981       | -0.17        | 0.22 (0.11, 0.34)    | 0.25    | 0.17     |  | 66    | 117       | -0.33        | 0.26 (-0.02, 0.55)     | 0.07    | 0.10     |
| Burkina Faso | iLiNS-Zinc (24)   | DMC  | 220   | 82        | -0.11        | 0.32 (0.10, 0.54)    | 0.07    | 0.09     |  | 526   | 293       | -0.27        | 0.35 (0.17, 0.54)      | 0.16    | 0.16     |
| Ghana        | GHANA (25)        |      |       |           |              |                      |         |          |  |       |           |              |                        |         |          |
| Ghana        | iLiNS-DYADG (26)  | PSED |       |           |              |                      |         |          |  |       |           |              |                        |         |          |
| Haiti        | HAITI (27)        |      |       |           |              |                      |         |          |  |       |           |              |                        |         |          |
| Kenya        | WASH-B (28)       | EASQ | 413   | 1419      | 0.02         | -0.04 (-0.16, 0.09)  | 0.21    | 0.16     |  | 236   | 649       | 0.04         | -0.01 (-0.15, 0.13)    | 0.29    | 0.20     |
| Madagascar   | MAHAY (29)        | ASQI | 405   | 430       | -0.04        | -0.05 (-0.41, 0.31)  | 0.03    | 0.05     |  | 1134  | 1133      | 0.06         | -0.09 (-0.28, 0.10)    | 0.16    | 0.16     |
| Malawi       | iLiNS-DYADM (30)  | PSED | 195   | 400       | 0.01         | 0.01 (-0.15, 0.18)   | 0.12    | 0.13     |  | 20    | 36        | -0.26        | 0.08 (-0.56, 0.72)     | 0.01    | 0.03     |
| Malawi       | iLiNS-DOSE (31)   | PSED | 514   | 177       | 0.00         | 0.03 (-0.14, 0.21)   | 0.11    | 0.12     |  | 44    | 15        | -0.06        | -0.06 (-0.58, 0.46)    | 0.02    | 0.04     |
| Mali         | PROMIS CS (32)    | DMC  | 528   | 552       | -0.04        | 0.12 (-0.09, 0.33)   | 0.08    | 0.10     |  | 357   | 378       | -0.15        | 0.17 (-0.05, 0.39)     | 0.12    | 0.13     |
| Zimbabwe     | SHINE (HIV-) (33) | MDAT | 228   | 220       | -0.04        | 0.11 (-0.08, 0.30)   | 0.09    | 0.11     |  | 131   | 122       | -0.13        | 0.09 (-0.12, 0.30)     | 0.12    | 0.14     |
| Zimbabwe     | SHINE (HIV+) (34) | MDAT | 37    | 41        | -0.25        | 0.30 (0.00, 0.60)    | 0.04    | 0.06     |  | 25    | 25        | 0.05         | -0.07 (-0.48, 0.34)    | 0.03    | 0.06     |

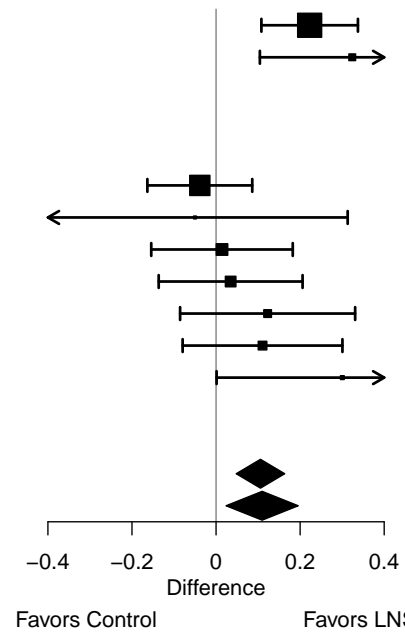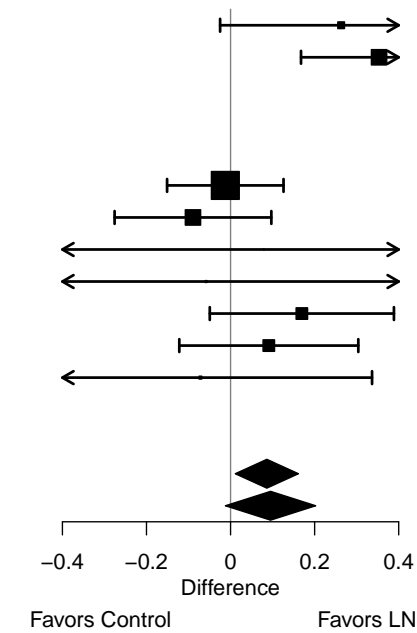

Fixed  
 Random  
 3001 4302  
 I<sup>2</sup> = 0.53, Tau<sup>2</sup> = 0.01  
 0.11 (0.05, 0.16)  
 0.11 (0.02, 0.20)

Fixed  
 Random  
 2539 2768  
 I<sup>2</sup> = 0.51, Tau<sup>2</sup> = 0.01  
 0.09 (0.01, 0.16)  
 0.10 (-0.01, 0.20)

Supplemental figure 6D: Mean difference in social-emotional z-score

6D4: Stratified by Household sanitation

P-for-interaction = 0.550  
 Difference in MDs = -0.03 (-0.14, 0.07)

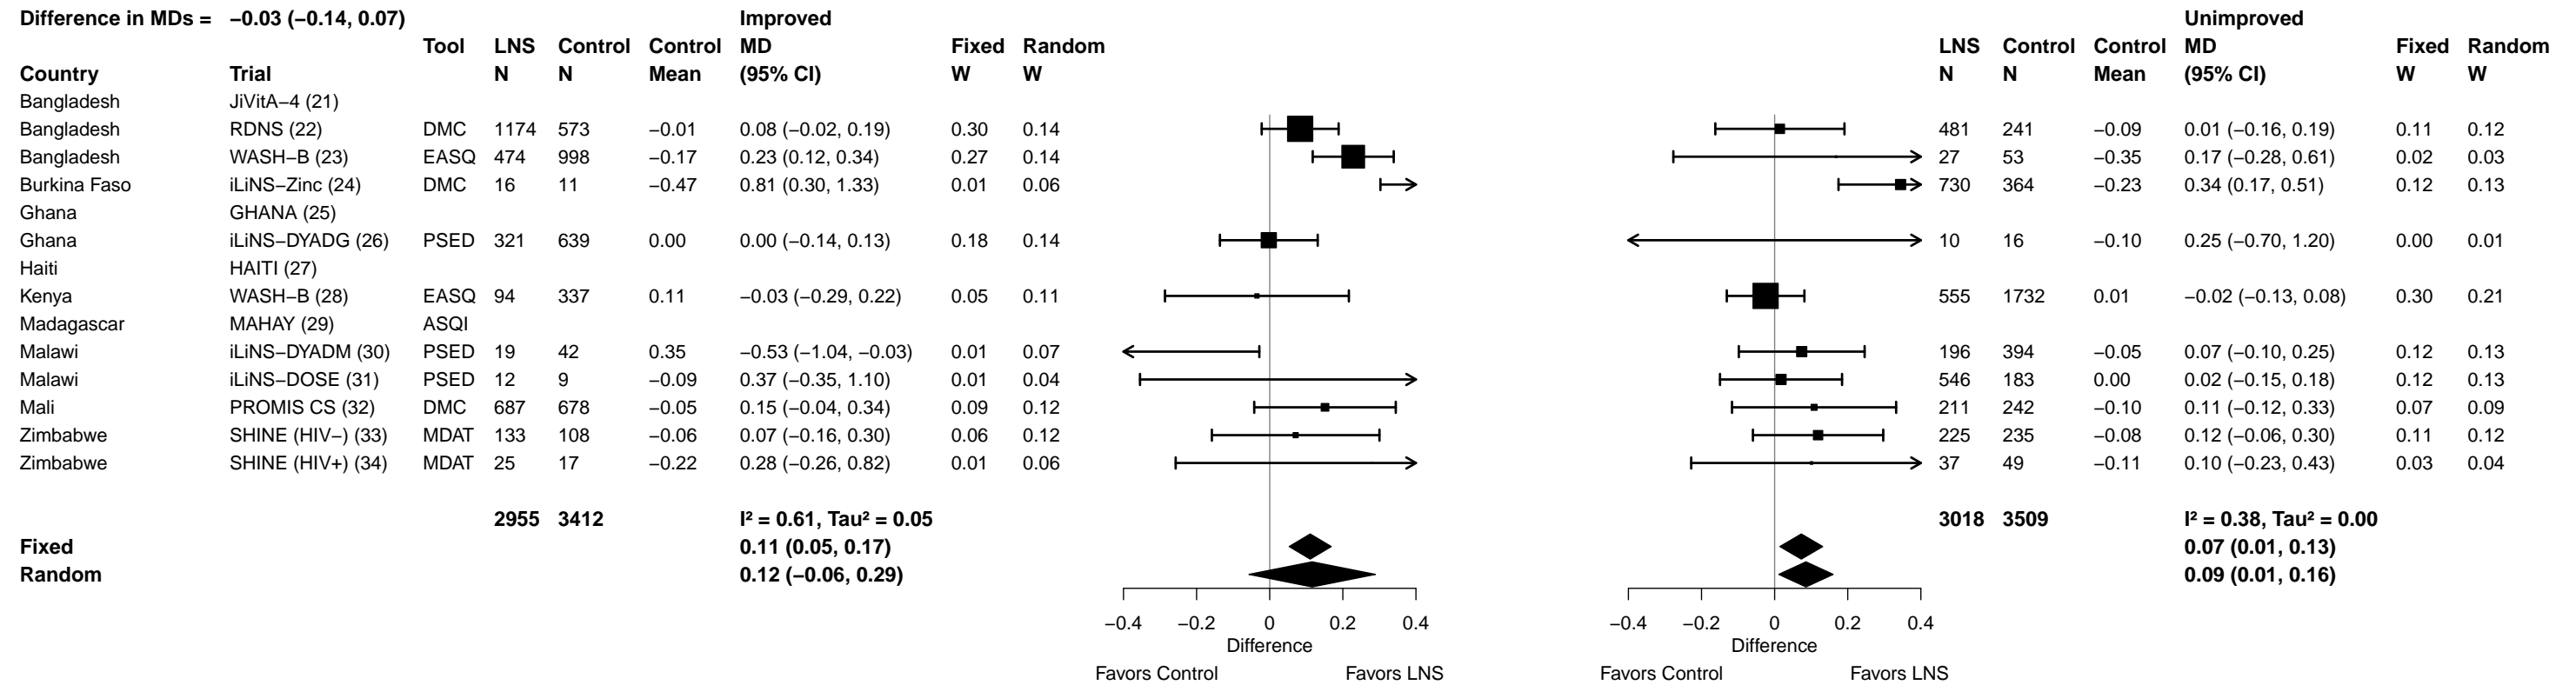

Supplemental figure 6D: Mean difference in social-emotional z-score

6D5: Stratified by Home environment

P-for-interaction = 0.363  
 Difference in MDs = 0.03 (-0.04, 0.10)

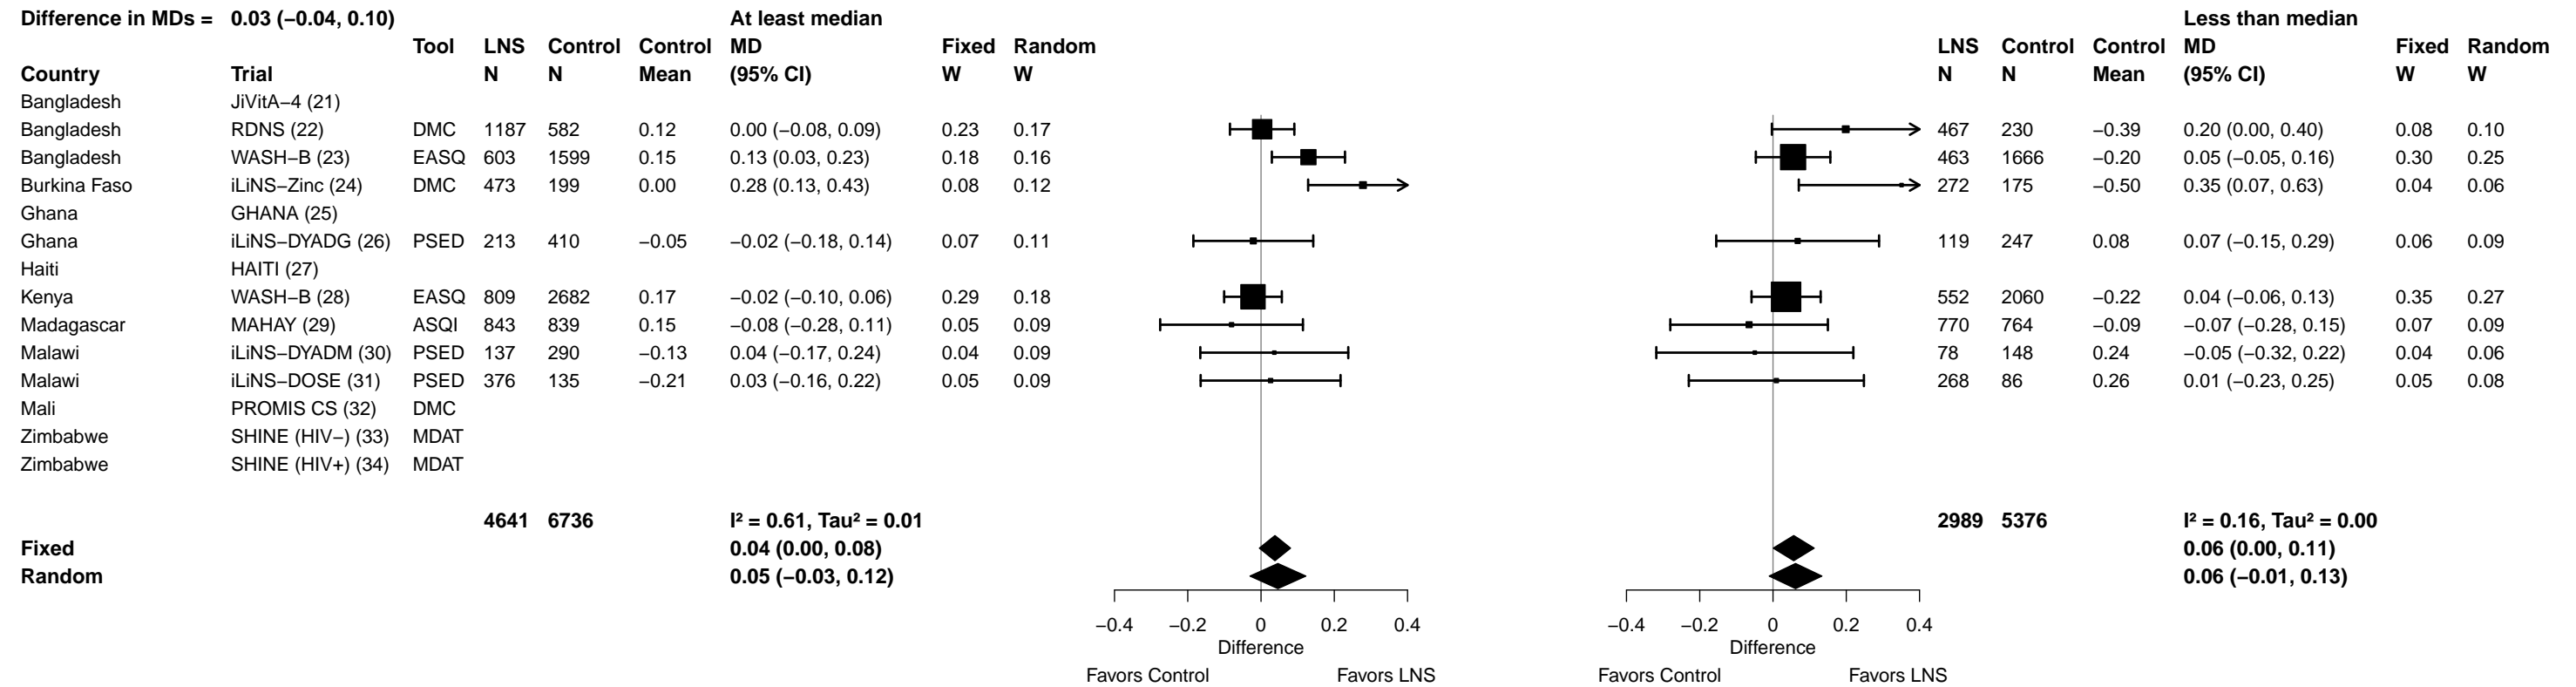

Supplemental figure 6D: Mean difference in social-emotional z-score

6D6: Stratified by Season at the time of assessment

**P-for-interaction = 0.734**  
**Difference in MDs = -0.01 (-0.08, 0.06)**

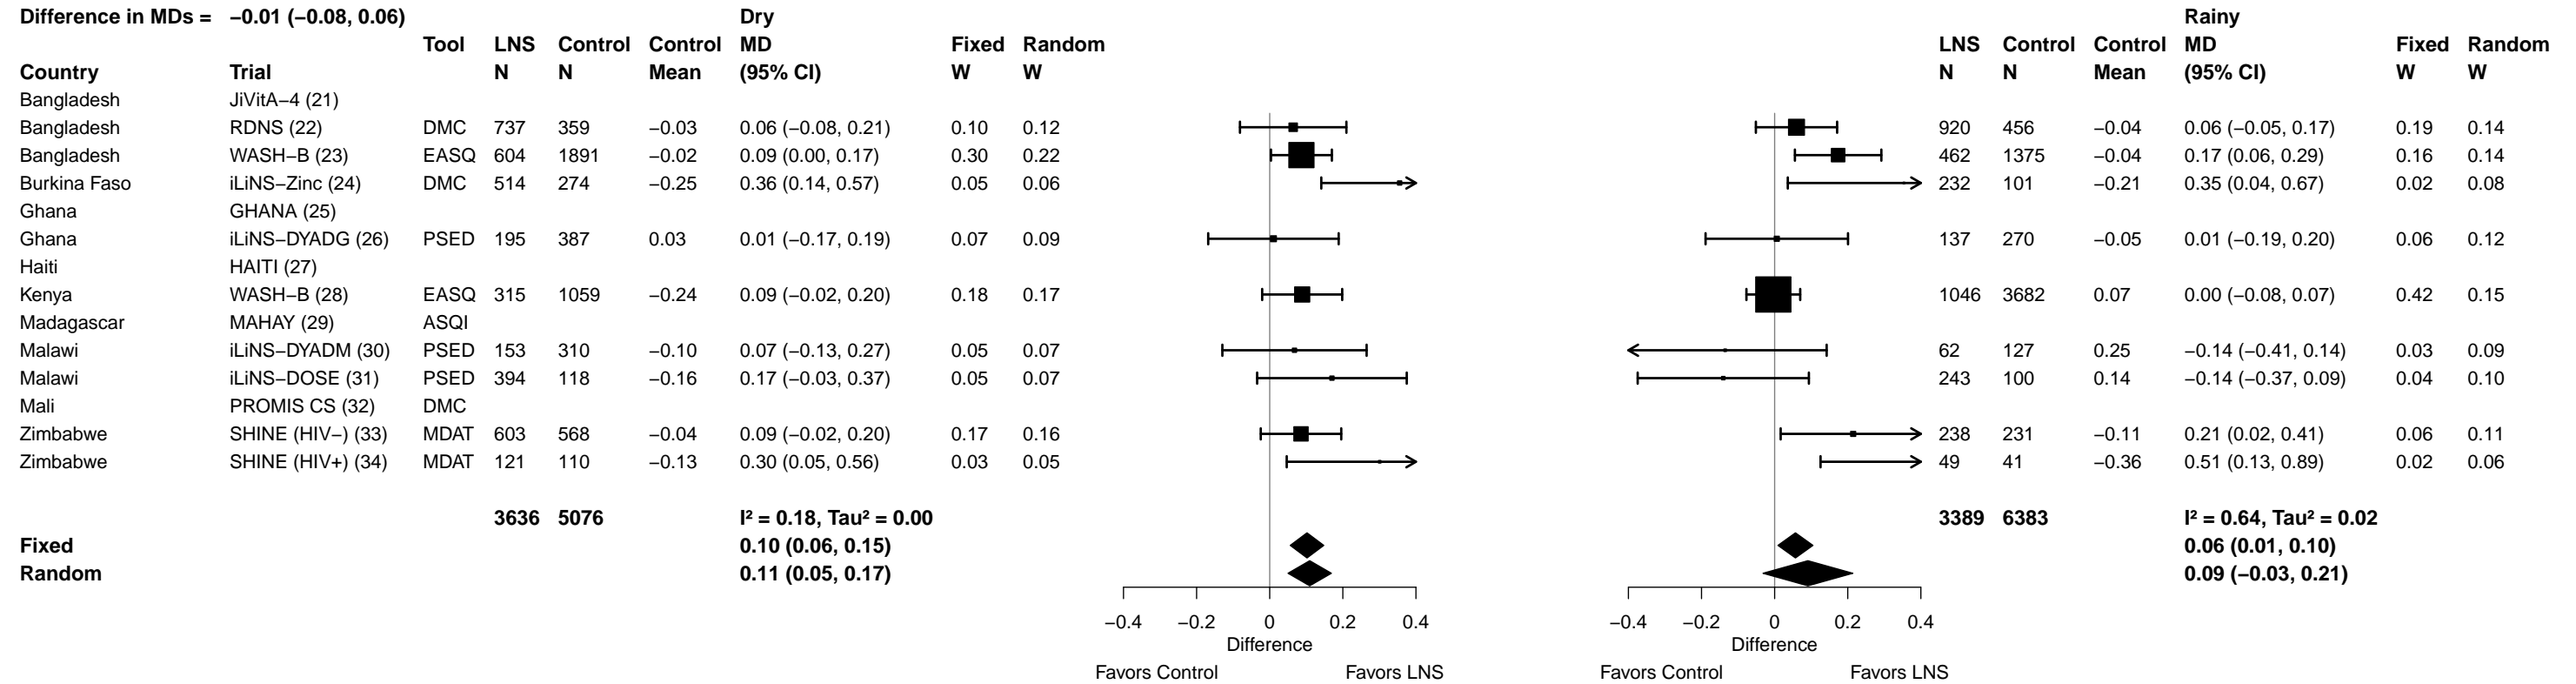

### Supplemental figure 6E: Social-emotional lowest decile prevalence ratio

#### 6E1: Stratified by Household socio-economic status

**P-for-interaction = 0.655**  
**Ratio of PRs = 0.96 (0.79, 1.16)**

| Country       | Trial             | Tool | LNS<br>N    | Control<br>N | Control<br>Prevalence | At least median<br>PR<br>(95% CI)                   | Fixed<br>W | Random<br>W |  | LNS<br>N    | Control<br>N | Control<br>Prevalence                               | Less than median<br>PR<br>(95% CI) | Fixed<br>W | Random<br>W |
|---------------|-------------------|------|-------------|--------------|-----------------------|-----------------------------------------------------|------------|-------------|--|-------------|--------------|-----------------------------------------------------|------------------------------------|------------|-------------|
|               |                   |      |             |              |                       |                                                     |            |             |  |             |              |                                                     |                                    |            |             |
| Bangladesh    | JiVitA-4 (21)     |      |             |              |                       |                                                     |            |             |  |             |              |                                                     |                                    |            |             |
| Bangladesh    | RDNS (22)         | DMC  | 830         | 407          | 10.1                  | 0.77 (0.52, 1.13)                                   | 0.14       | 0.11        |  | 827         | 408          | 12.7                                                | 0.90 (0.67, 1.22)                  | 0.17       | 0.17        |
| Bangladesh    | WASH-B (23)       | EASQ | 545         | 1659         | 7.4                   | 1.02 (0.67, 1.57)                                   | 0.12       | 0.10        |  | 521         | 1607         | 13.8                                                | 0.70 (0.53, 0.93)                  | 0.19       | 0.19        |
| Burkina Faso  | iLiNS-Zinc (24)   | DMC  | 459         | 163          | 14.7                  | 0.31 (0.17, 0.56)                                   | 0.06       | 0.09        |  | 287         | 212          | 17.9                                                | 0.58 (0.35, 0.98)                  | 0.06       | 0.06        |
| Ghana         | GHANA (25)        |      |             |              |                       |                                                     |            |             |  |             |              |                                                     |                                    |            |             |
| Ghana         | iLiNS-DYADG (26)  | PSED | 153         | 341          | 8.5                   | 1.61 (0.95, 2.74)                                   | 0.08       | 0.09        |  | 179         | 314          | 11.8                                                | 0.57 (0.30, 1.06)                  | 0.04       | 0.04        |
| Haiti         | HAITI (27)        |      |             |              |                       |                                                     |            |             |  |             |              |                                                     |                                    |            |             |
| Kenya         | WASH-B (28)       | EASQ | 778         | 2706         | 9.2                   | 0.80 (0.59, 1.09)                                   | 0.22       | 0.11        |  | 582         | 2036         | 11.8                                                | 0.96 (0.74, 1.23)                  | 0.24       | 0.24        |
| Madagascar    | MAHAY (29)        | ASQI | 741         | 845          | 5.7                   | 1.38 (0.78, 2.44)                                   | 0.07       | 0.09        |  | 823         | 724          | 13.1                                                | 0.98 (0.62, 1.54)                  | 0.07       | 0.07        |
| Malawi        | iLiNS-DYADM (30)  | PSED | 118         | 230          | 10.4                  | 0.97 (0.51, 1.88)                                   | 0.05       | 0.08        |  | 97          | 207          | 10.1                                                | 1.02 (0.50, 2.07)                  | 0.03       | 0.03        |
| Malawi        | iLiNS-DOSE (31)   | PSED | 278         | 94           | 6.4                   | 1.75 (0.75, 4.06)                                   | 0.03       | 0.06        |  | 270         | 96           | 11.5                                                | 0.81 (0.41, 1.58)                  | 0.03       | 0.03        |
| Mali          | PROMIS CS (32)    | DMC  | 494         | 450          | 9.6                   | 0.85 (0.52, 1.39)                                   | 0.09       | 0.10        |  | 433         | 494          | 13.0                                                | 0.73 (0.48, 1.12)                  | 0.08       | 0.08        |
| Zimbabwe      | SHINE (HIV-) (33) | MDAT | 406         | 359          | 13.1                  | 0.58 (0.38, 0.88)                                   | 0.12       | 0.10        |  | 389         | 391          | 11.8                                                | 0.76 (0.48, 1.23)                  | 0.07       | 0.07        |
| Zimbabwe      | SHINE (HIV+) (34) | MDAT | 91          | 78           | 16.7                  | 0.40 (0.17, 0.93)                                   | 0.03       | 0.06        |  | 74          | 67           | 10.4                                                | 0.65 (0.21, 2.01)                  | 0.01       | 0.01        |
|               |                   |      | <b>4893</b> | <b>7332</b>  |                       |                                                     |            |             |  | <b>4482</b> | <b>6556</b>  |                                                     |                                    |            |             |
|               |                   |      |             |              |                       | <b>I<sup>2</sup> = 0.67, Tau<sup>2</sup> = 0.18</b> |            |             |  |             |              | <b>I<sup>2</sup> = 0.00, Tau<sup>2</sup> = 0.00</b> |                                    |            |             |
| <b>Fixed</b>  |                   |      |             |              |                       | <b>0.83 (0.71, 0.95)</b>                            |            |             |  |             |              | <b>0.81 (0.72, 0.92)</b>                            |                                    |            |             |
| <b>Random</b> |                   |      |             |              |                       | <b>0.84 (0.62, 1.13)</b>                            |            |             |  |             |              | <b>0.81 (0.72, 0.92)</b>                            |                                    |            |             |

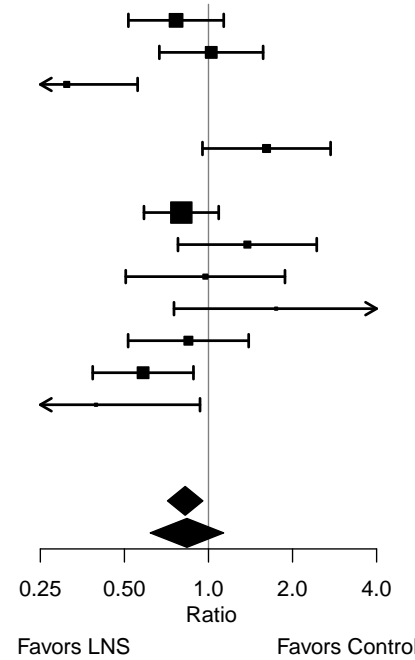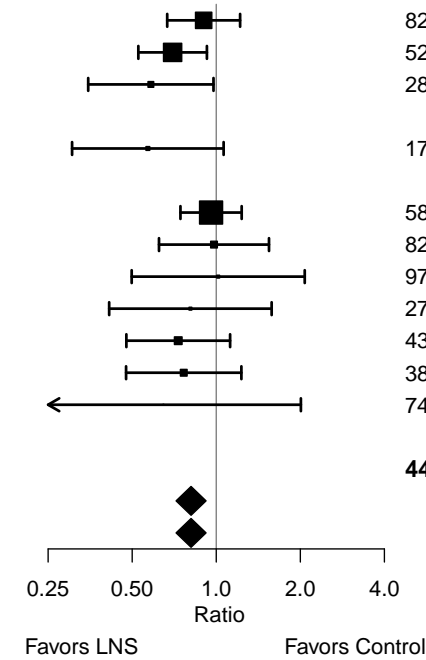

Supplemental figure 6E: Social-emotional lowest decile prevalence ratio

6E2: Stratified by Household food insecurity

P-for-interaction = 0.325  
 Ratio of PRs = 1.11 (0.90, 1.37)

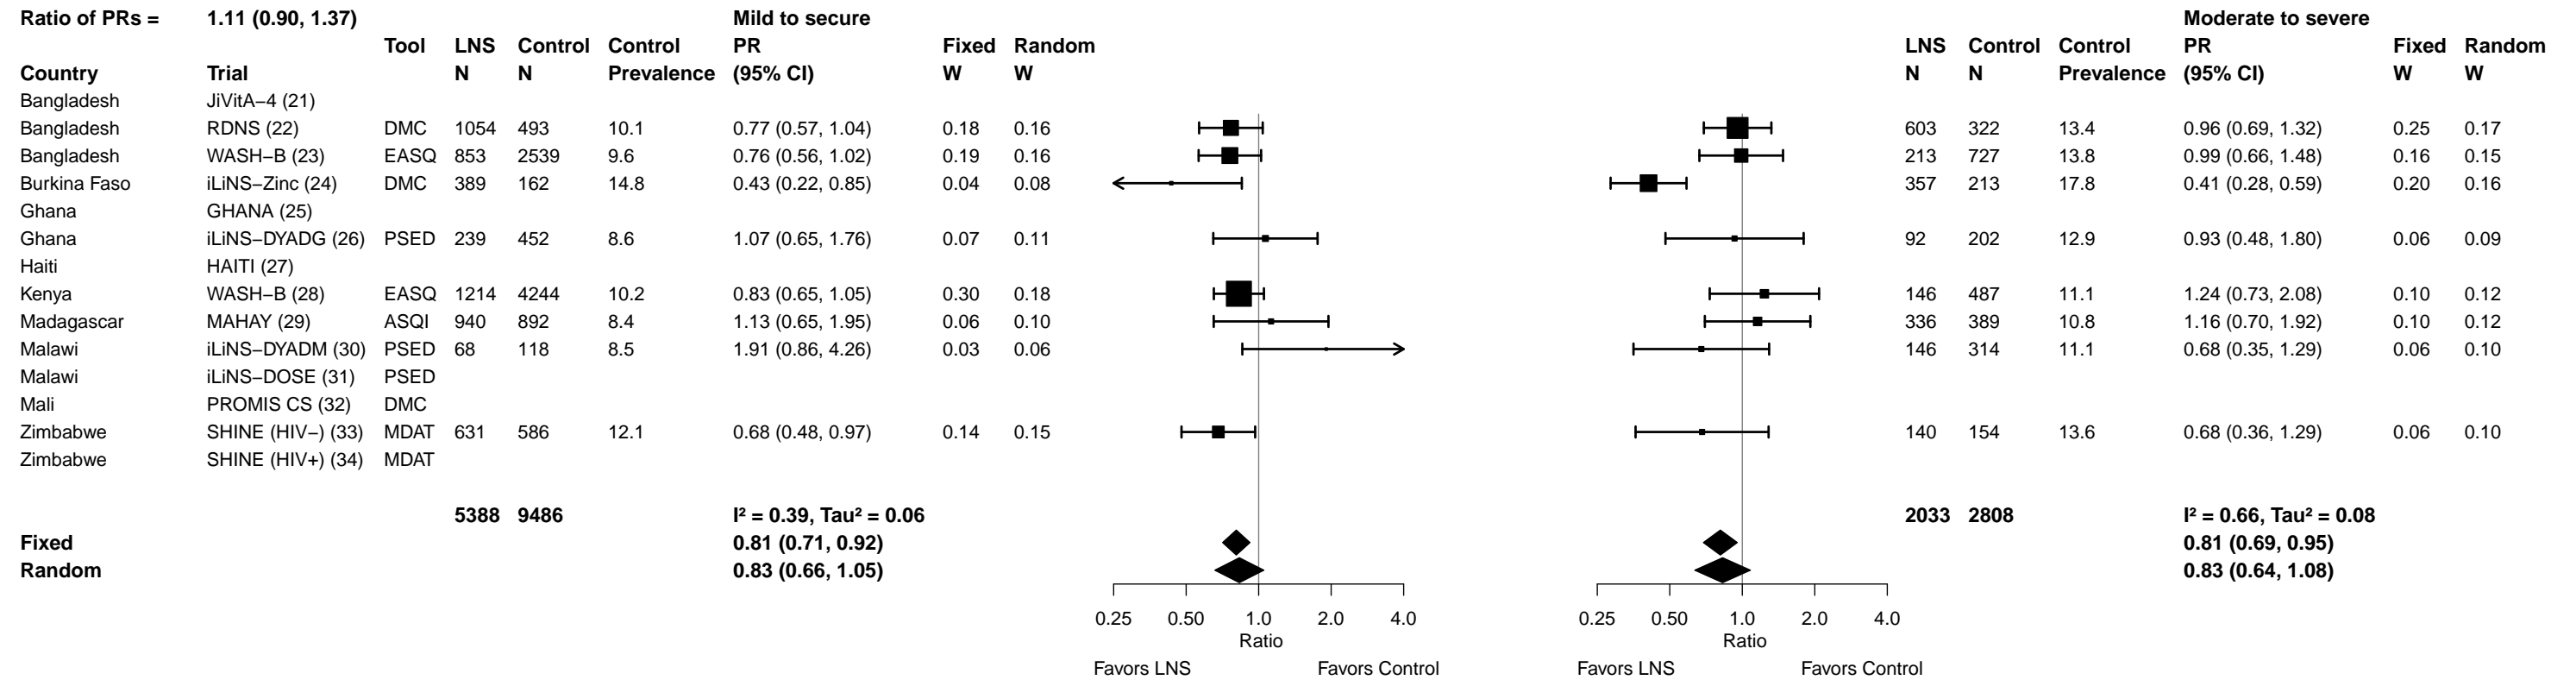

Supplemental figure 6E: Social-emotional lowest decile prevalence ratio

6E3: Stratified by Household source water quality

P-for-interaction = 0.534  
 Ratio of PRs = 1.10 (0.81, 1.49)

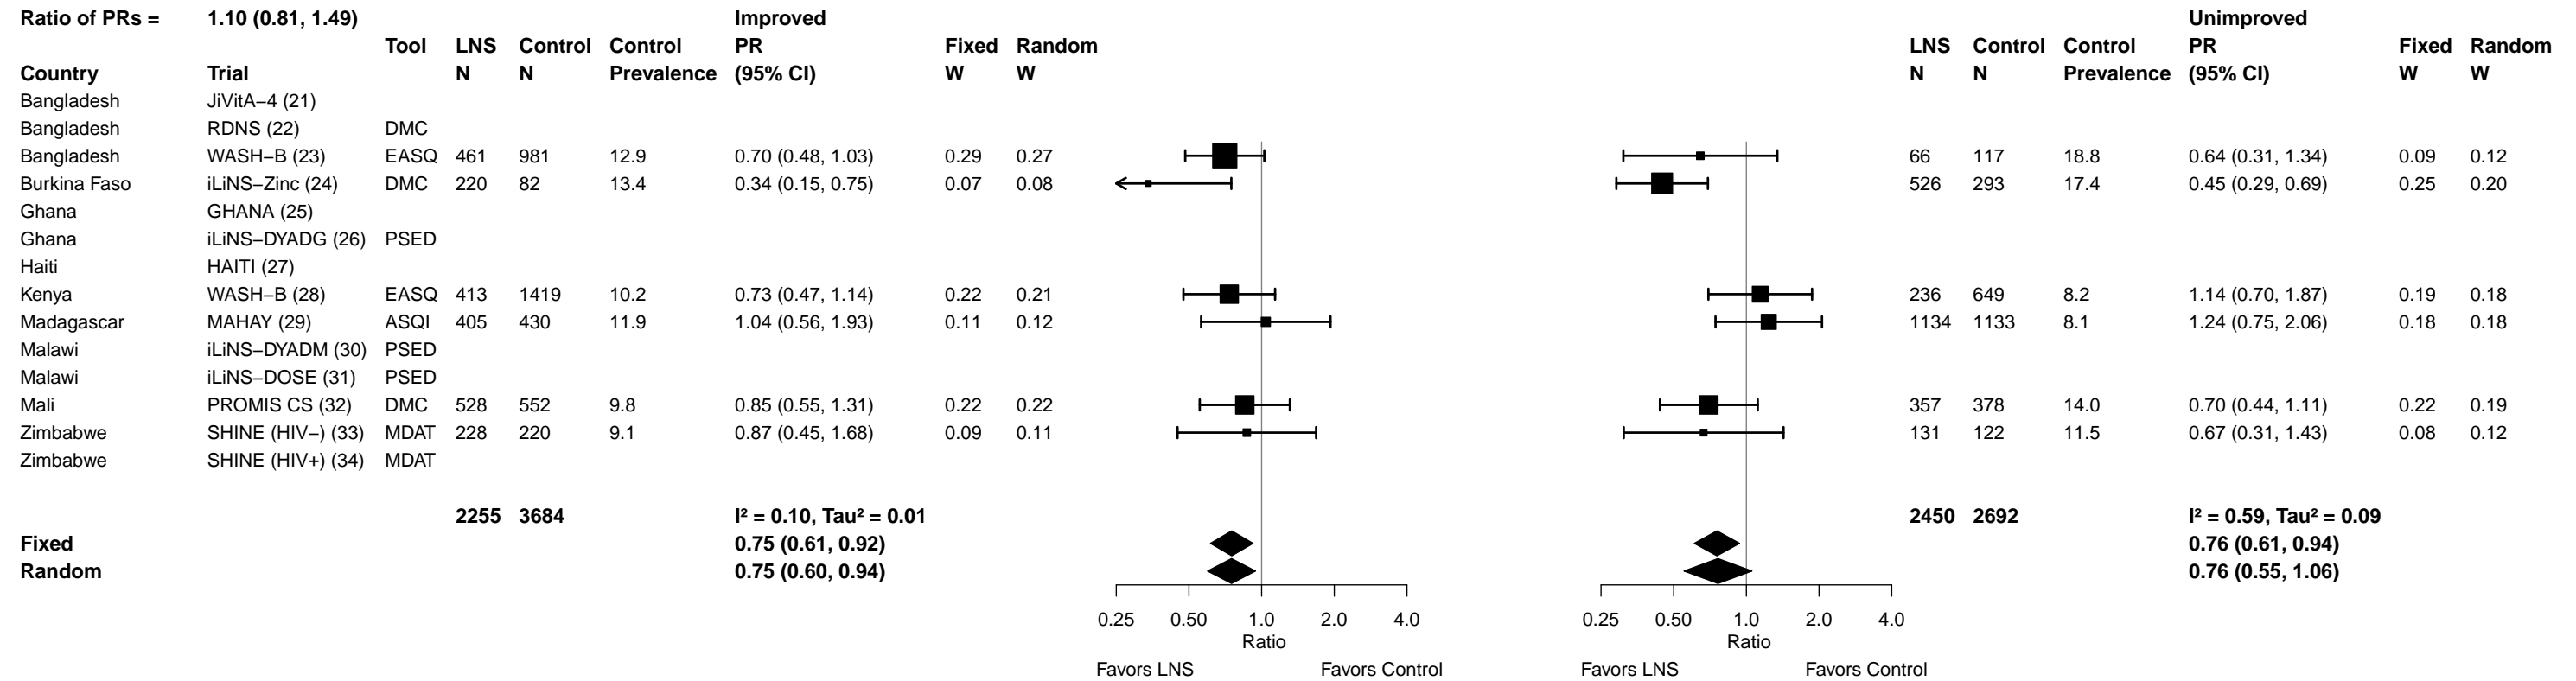

Supplemental figure 6E: Social-emotional lowest decile prevalence ratio

6E4: Stratified by Household sanitation

**P-for-interaction = 0.304**  
**Ratio of PRs = 0.84 (0.60, 1.17)**

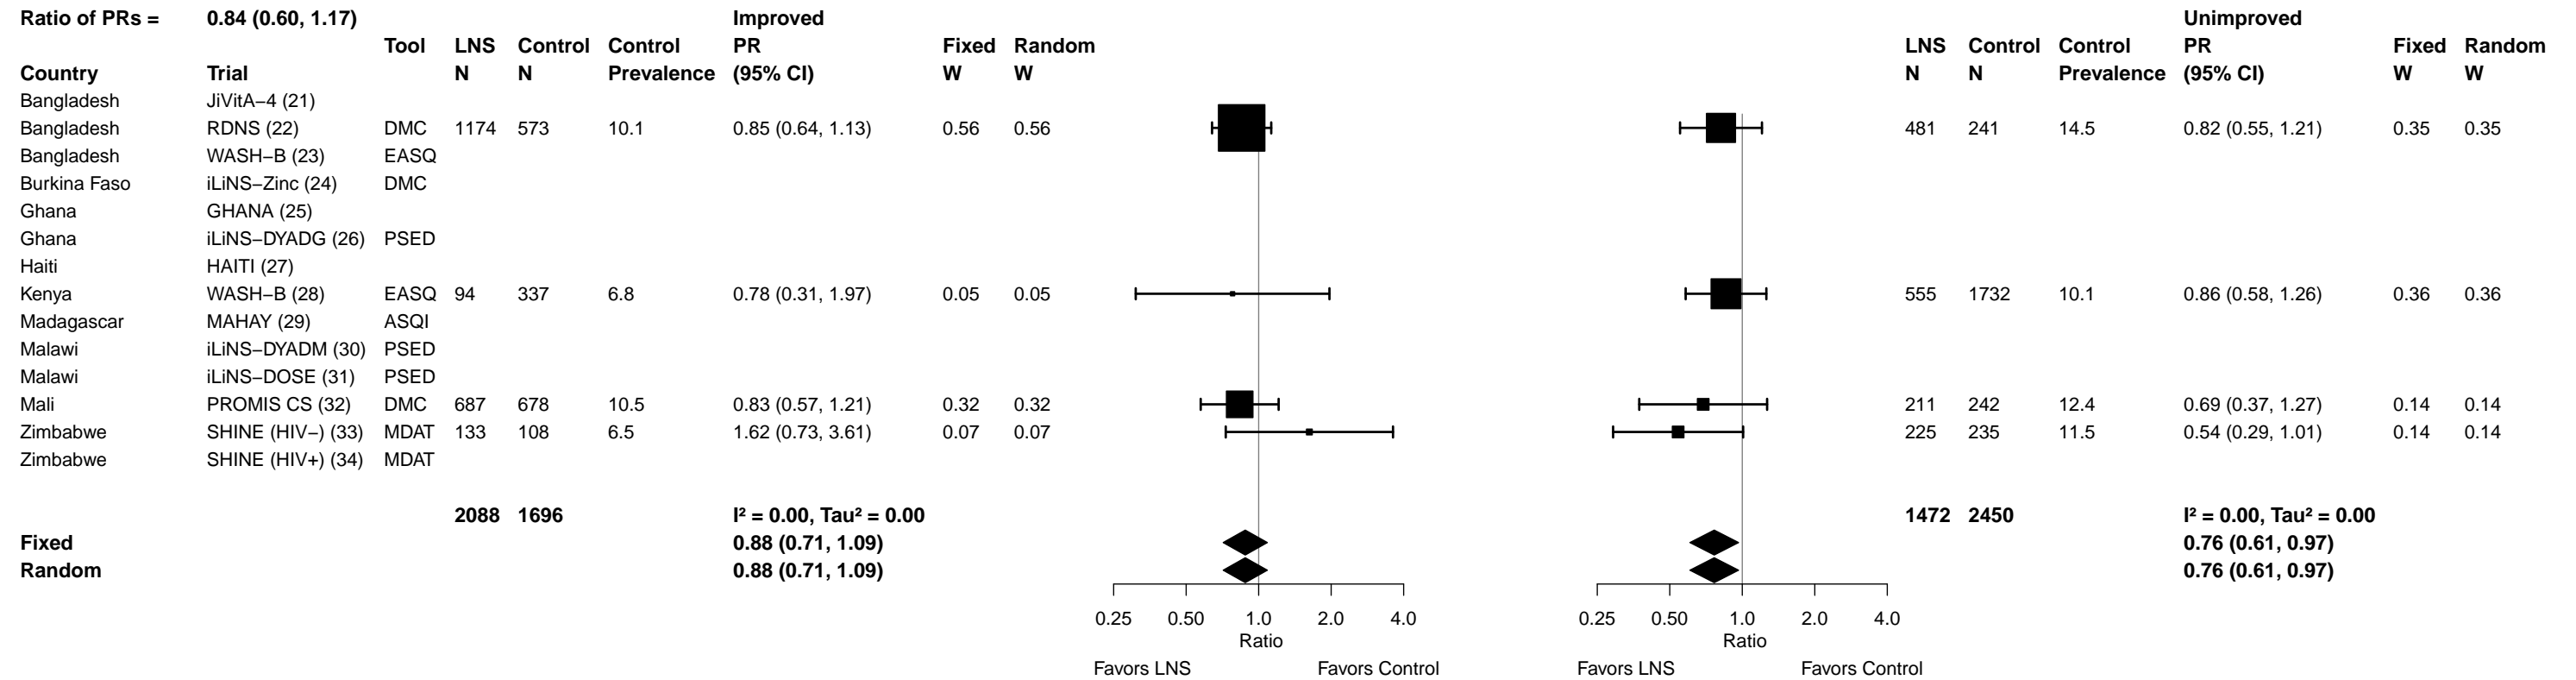



Supplemental figure 6E: Social-emotional lowest decile prevalence ratio

6E5: Stratified by Home environment

P-for-interaction = 0.863  
 Ratio of PRs = 1.02 (0.84, 1.23)

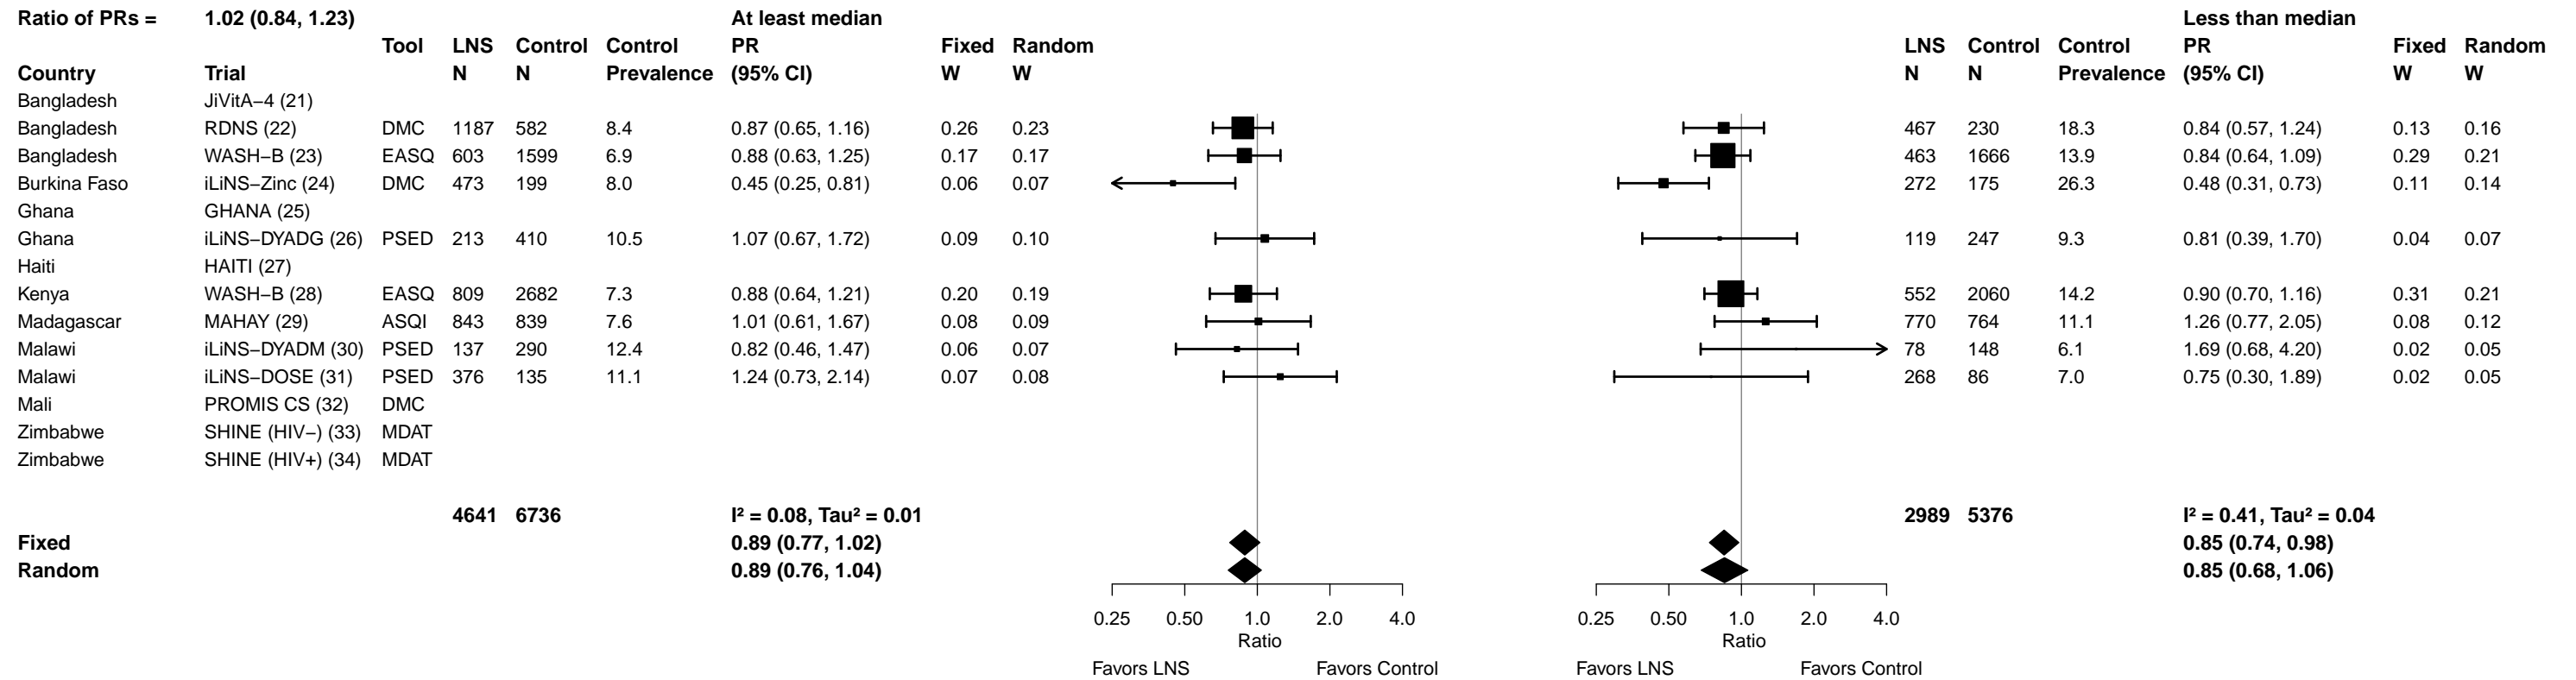

Supplemental figure 6E: Social-emotional lowest decile prevalence ratio

6E6: Stratified by Season at the time of assessment

P-for-interaction = 0.584

Ratio of PRs = 1.06 (0.85, 1.33)

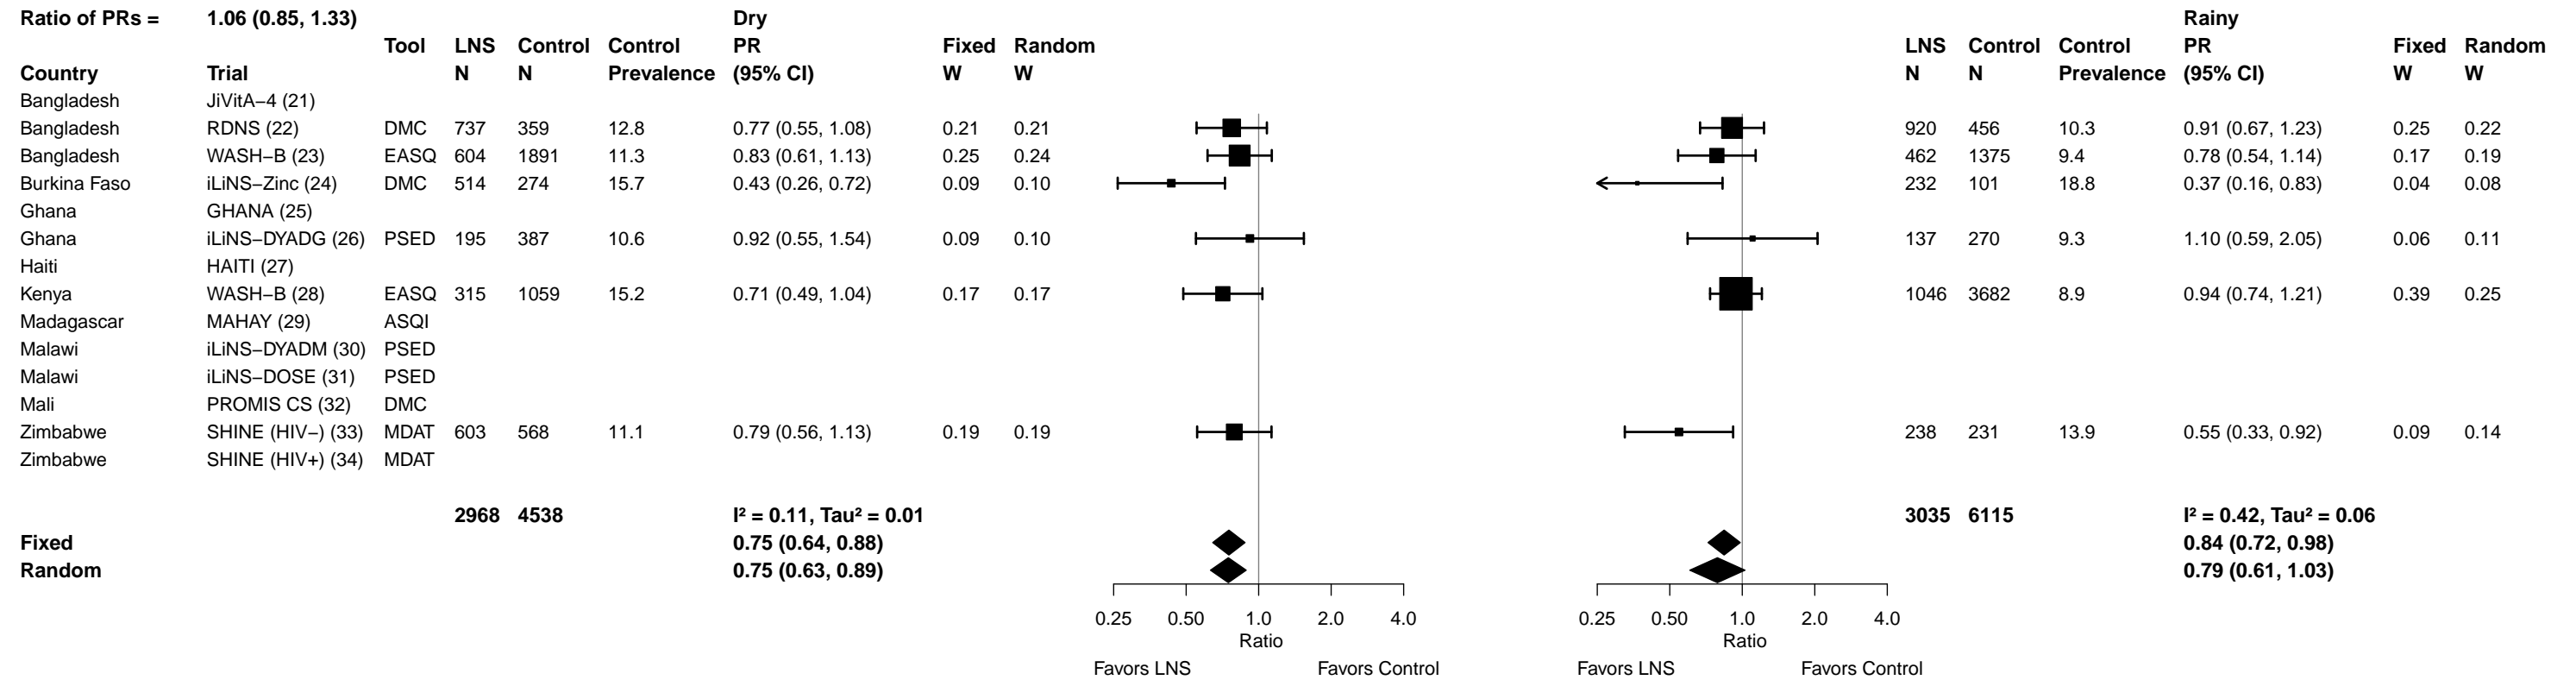

### Supplemental figure 6F: Social-emotional lowest decile prevalence difference

#### 6F1: Stratified by Household socio-economic status

**P-for-interaction = 0.160**  
**Difference in PDs = -0.01 (-0.03, 0.00)**

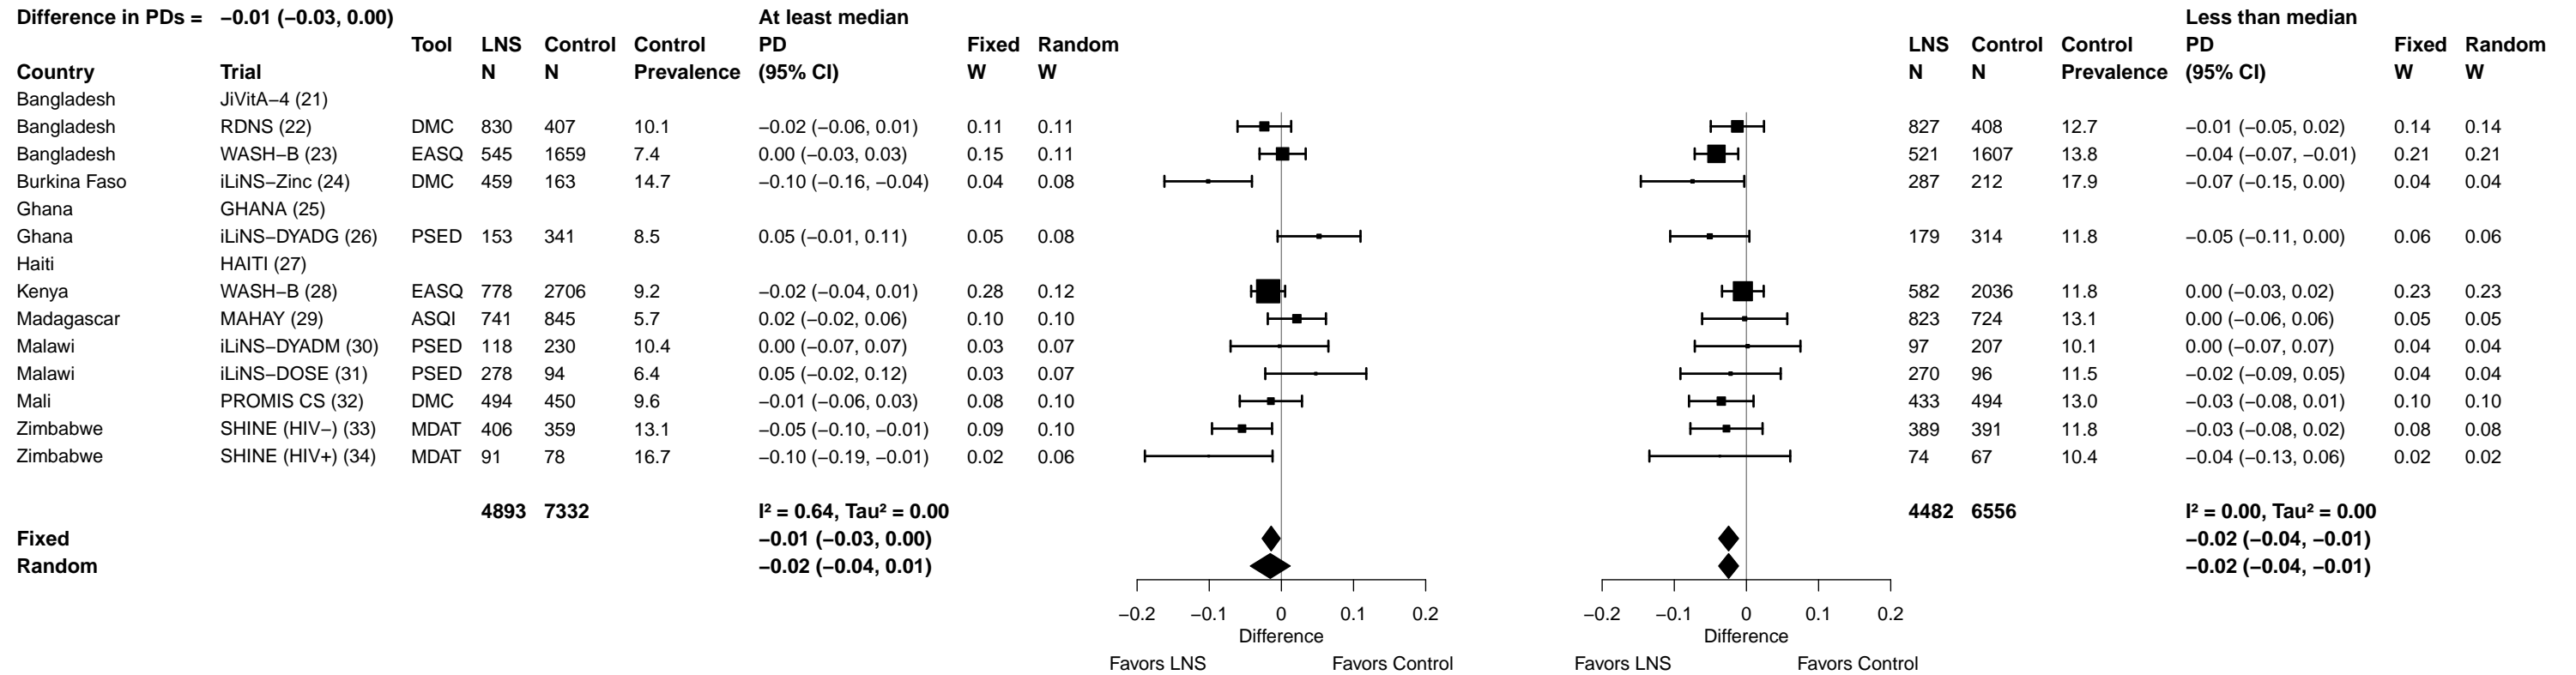

Supplemental figure 6F: Social-emotional lowest decile prevalence difference

6F2: Stratified by Household food insecurity

P-for-interaction = 0.599  
 Difference in PDs = 0.01 (-0.02, 0.03)

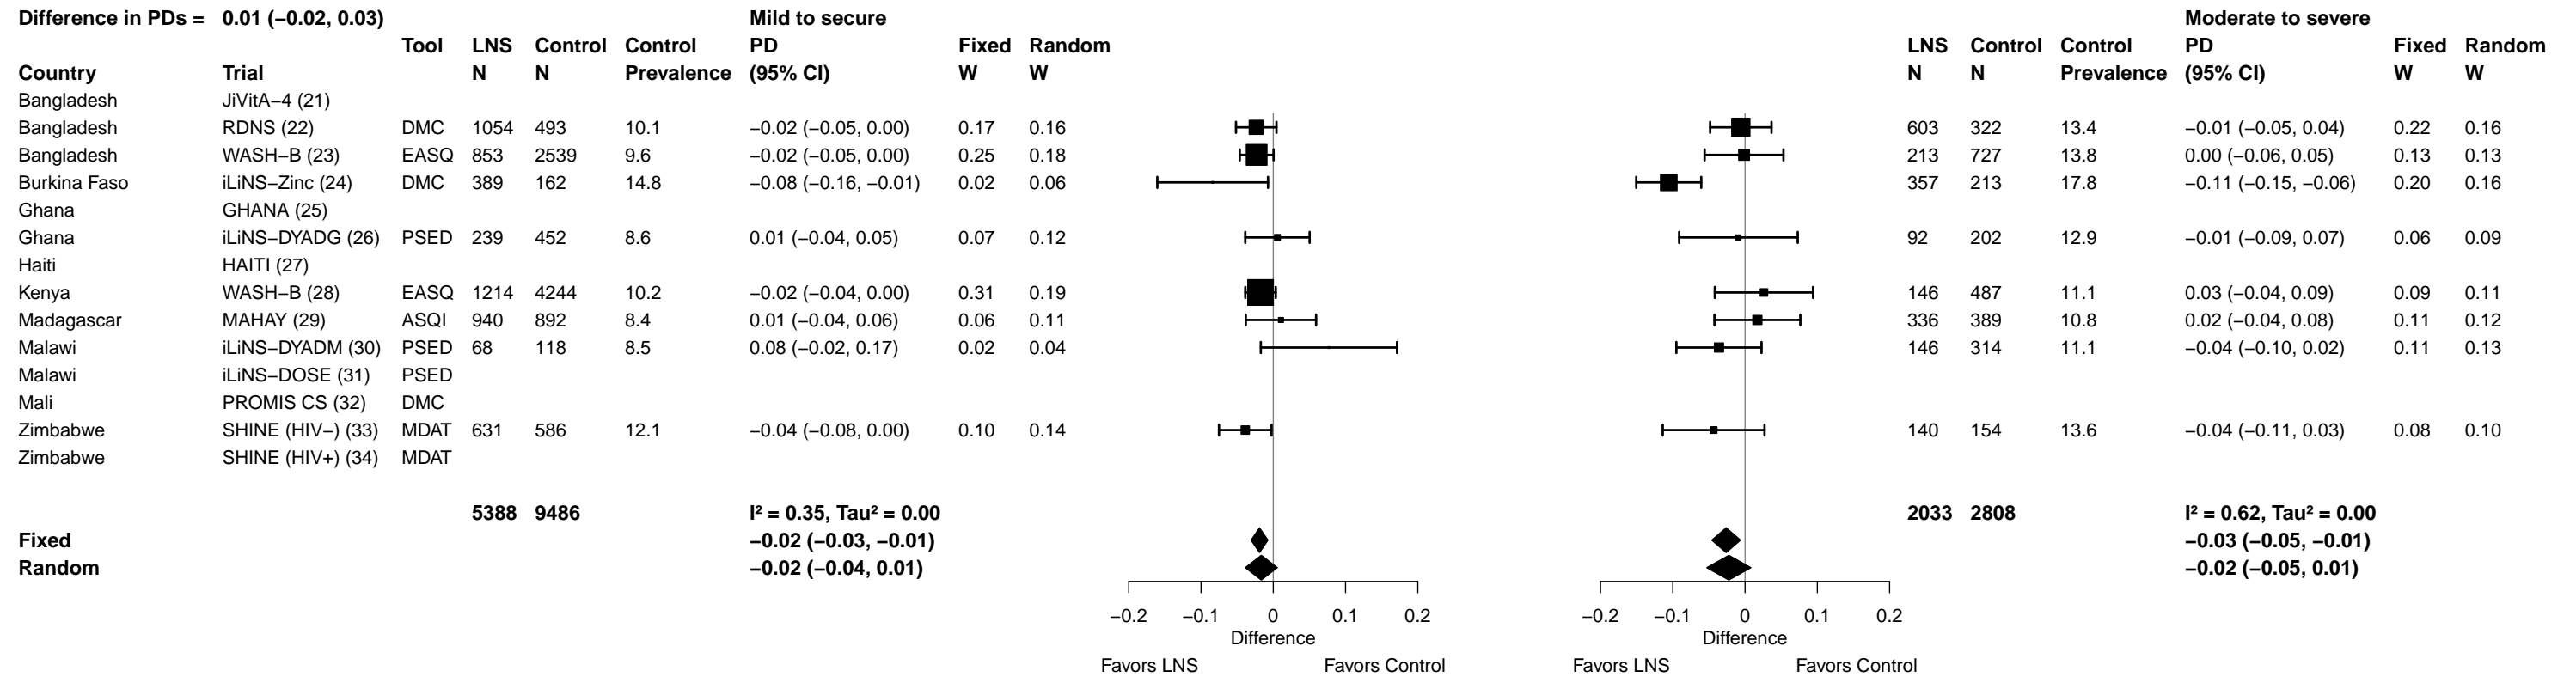

Supplemental figure 6F: Social-emotional lowest decile prevalence difference

6F3: Stratified by Household source water quality

P-for-interaction = 0.782  
 Difference in PDs = 0.00 (-0.02, 0.03)

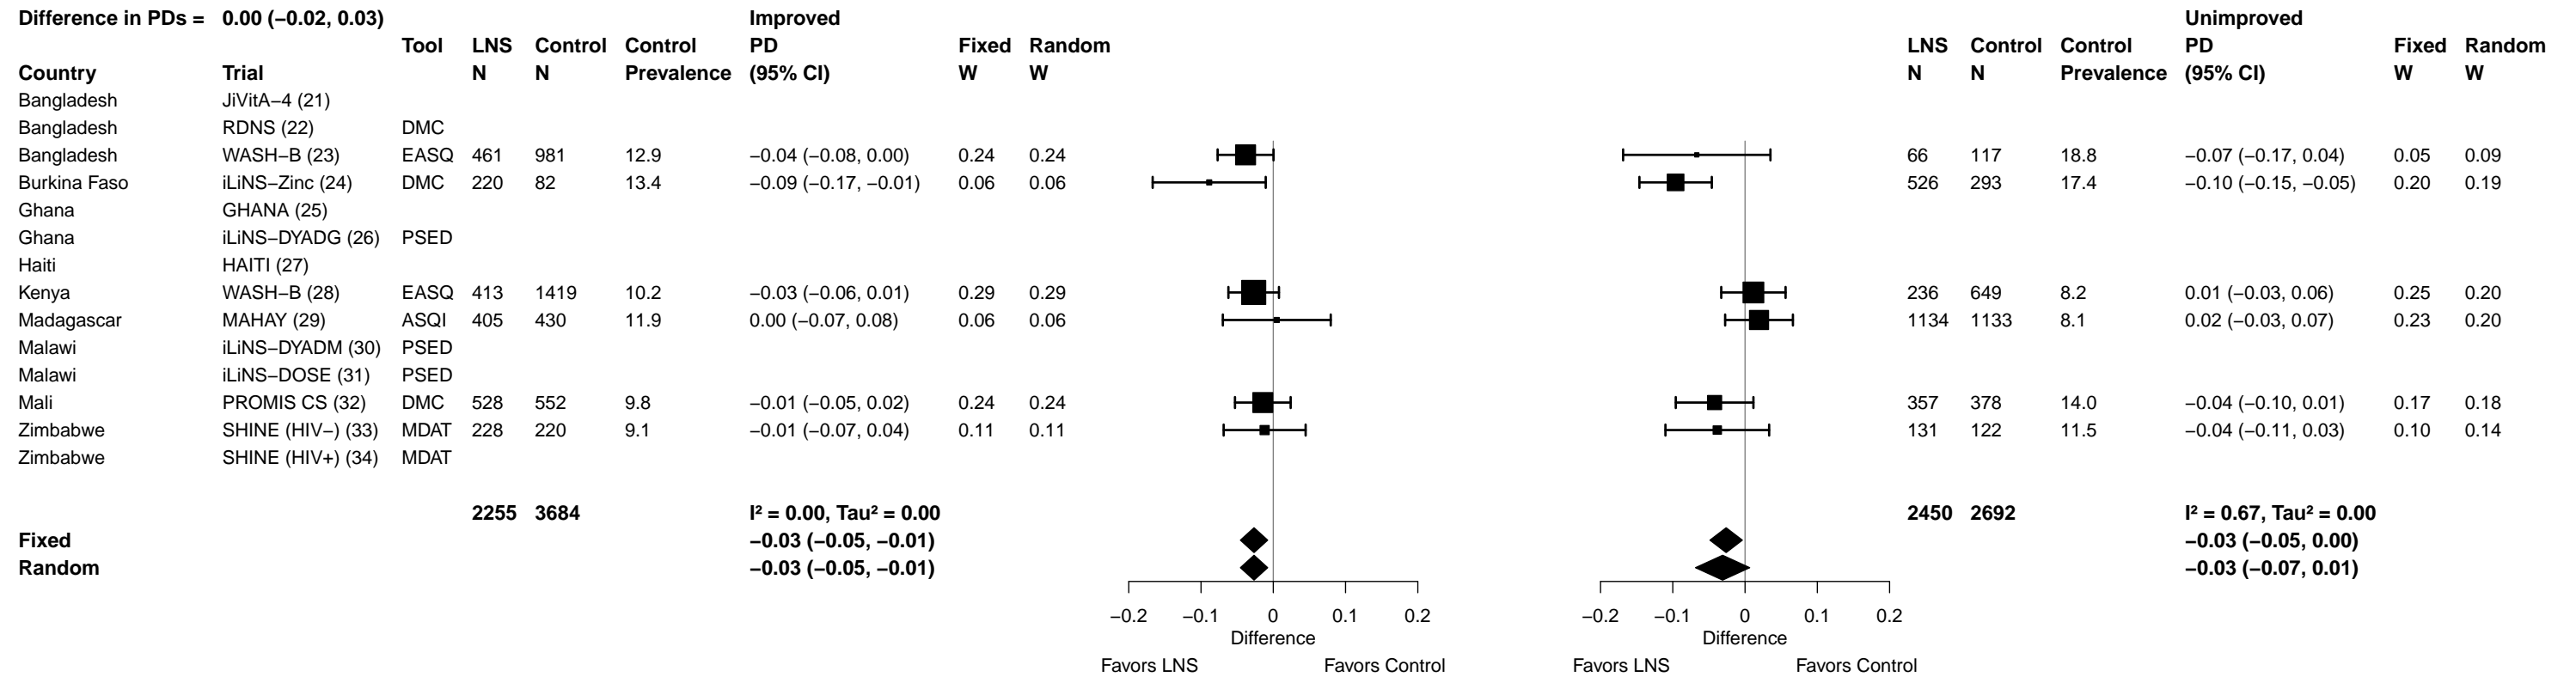

Supplemental figure 6F: Social-emotional lowest decile prevalence difference

6F4: Stratified by Household sanitation

**P-for-interaction = 0.189**  
**Difference in PDs = -0.02 (-0.05, 0.01)**

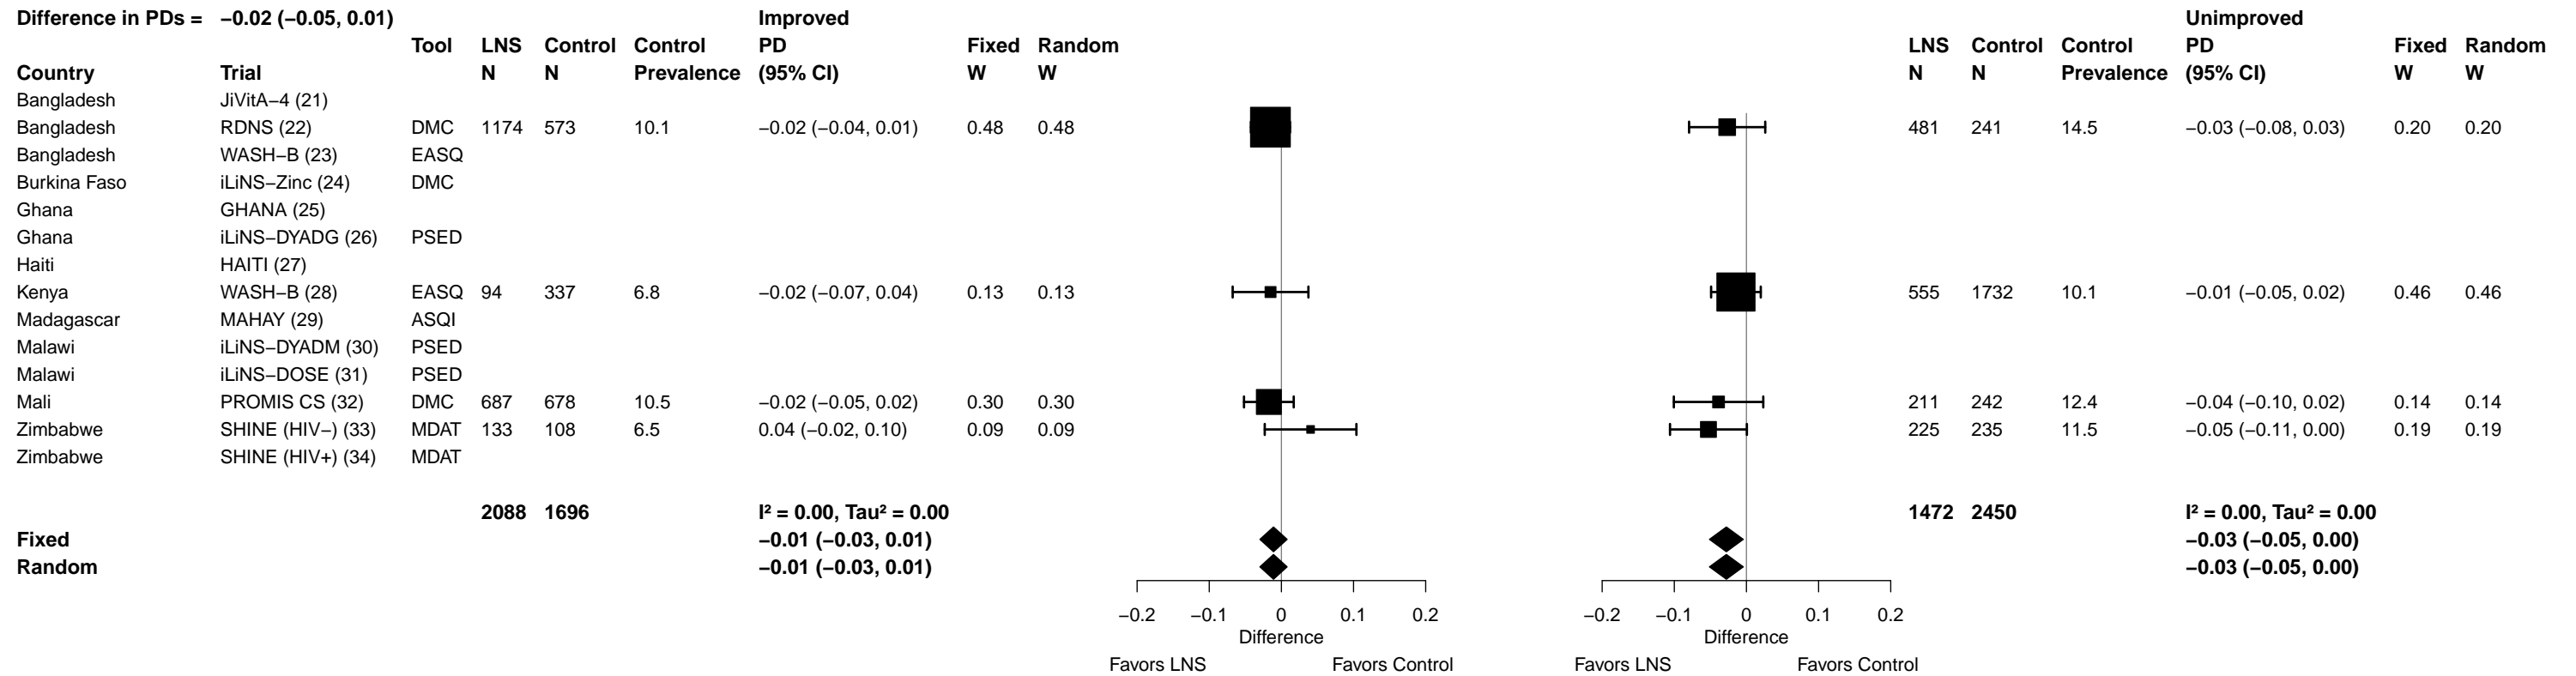

Supplemental figure 6F: Social-emotional lowest decile prevalence difference

6F5: Stratified by Home environment

**P-for-interaction = 0.545**  
**Difference in PDs = -0.01 (-0.03, 0.01)**

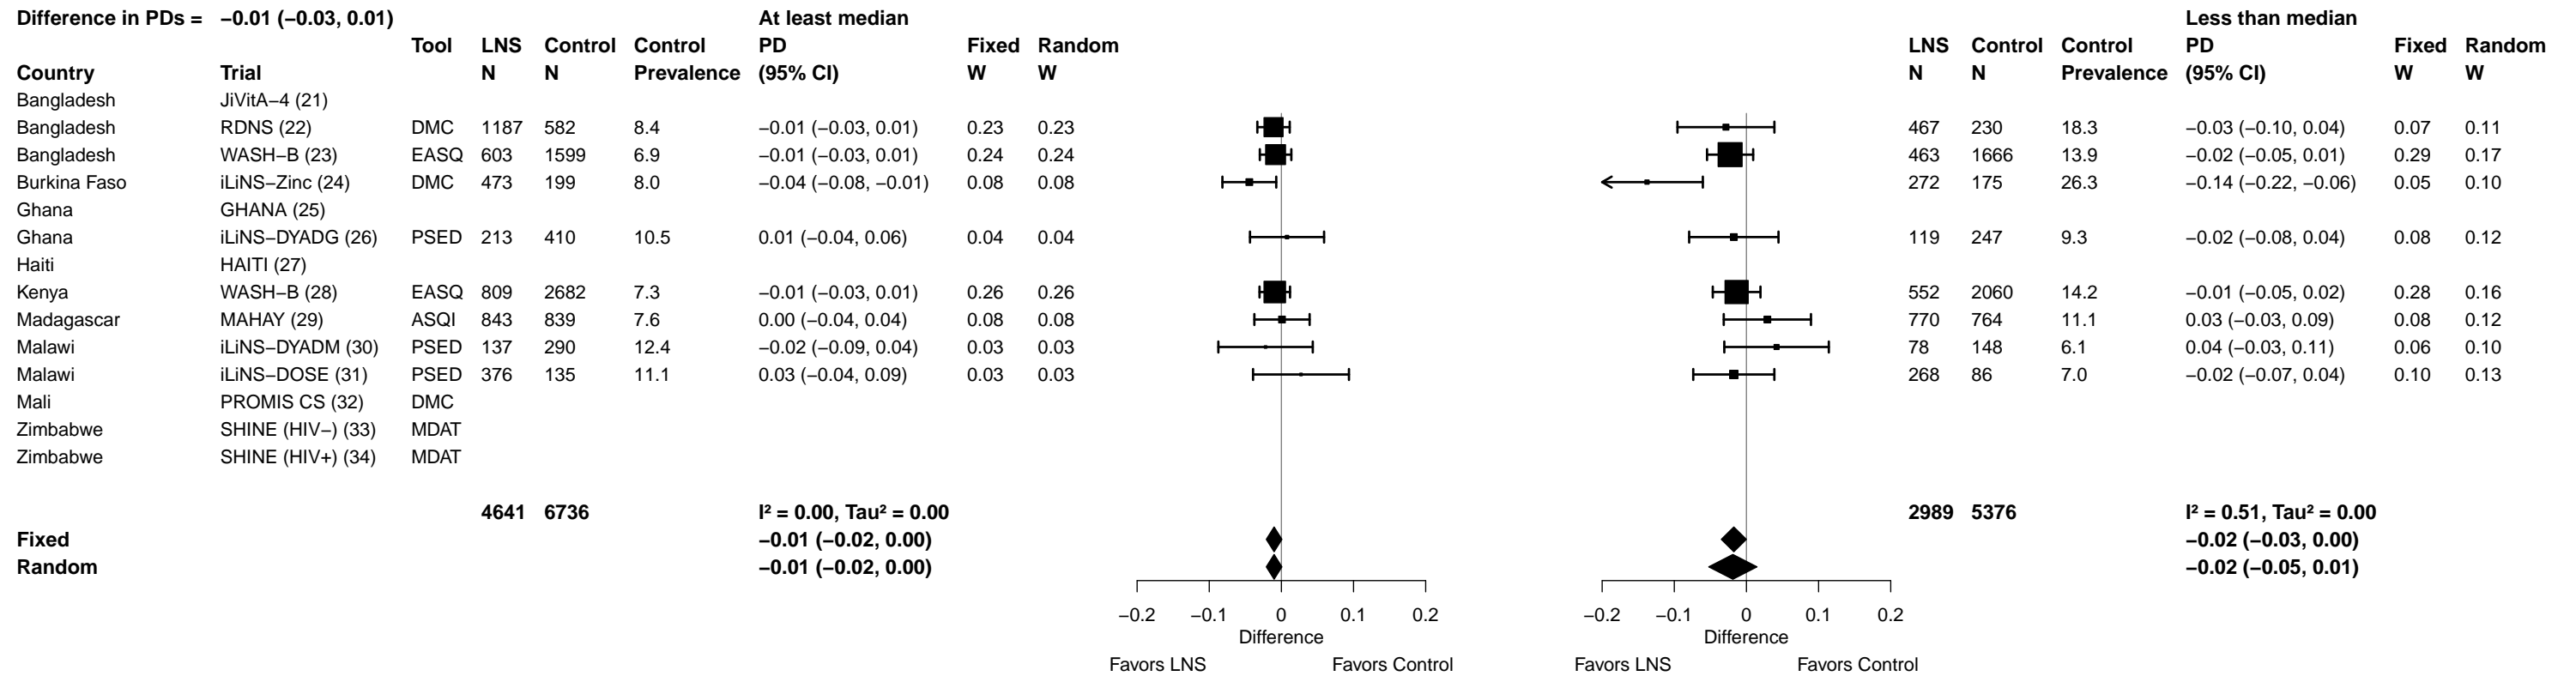

Supplemental figure 6F: Social-emotional lowest decile prevalence difference

6F6: Stratified by Season at the time of assessment

P-for-interaction = 0.493  
 Difference in PDs = 0.01 (-0.01, 0.03)

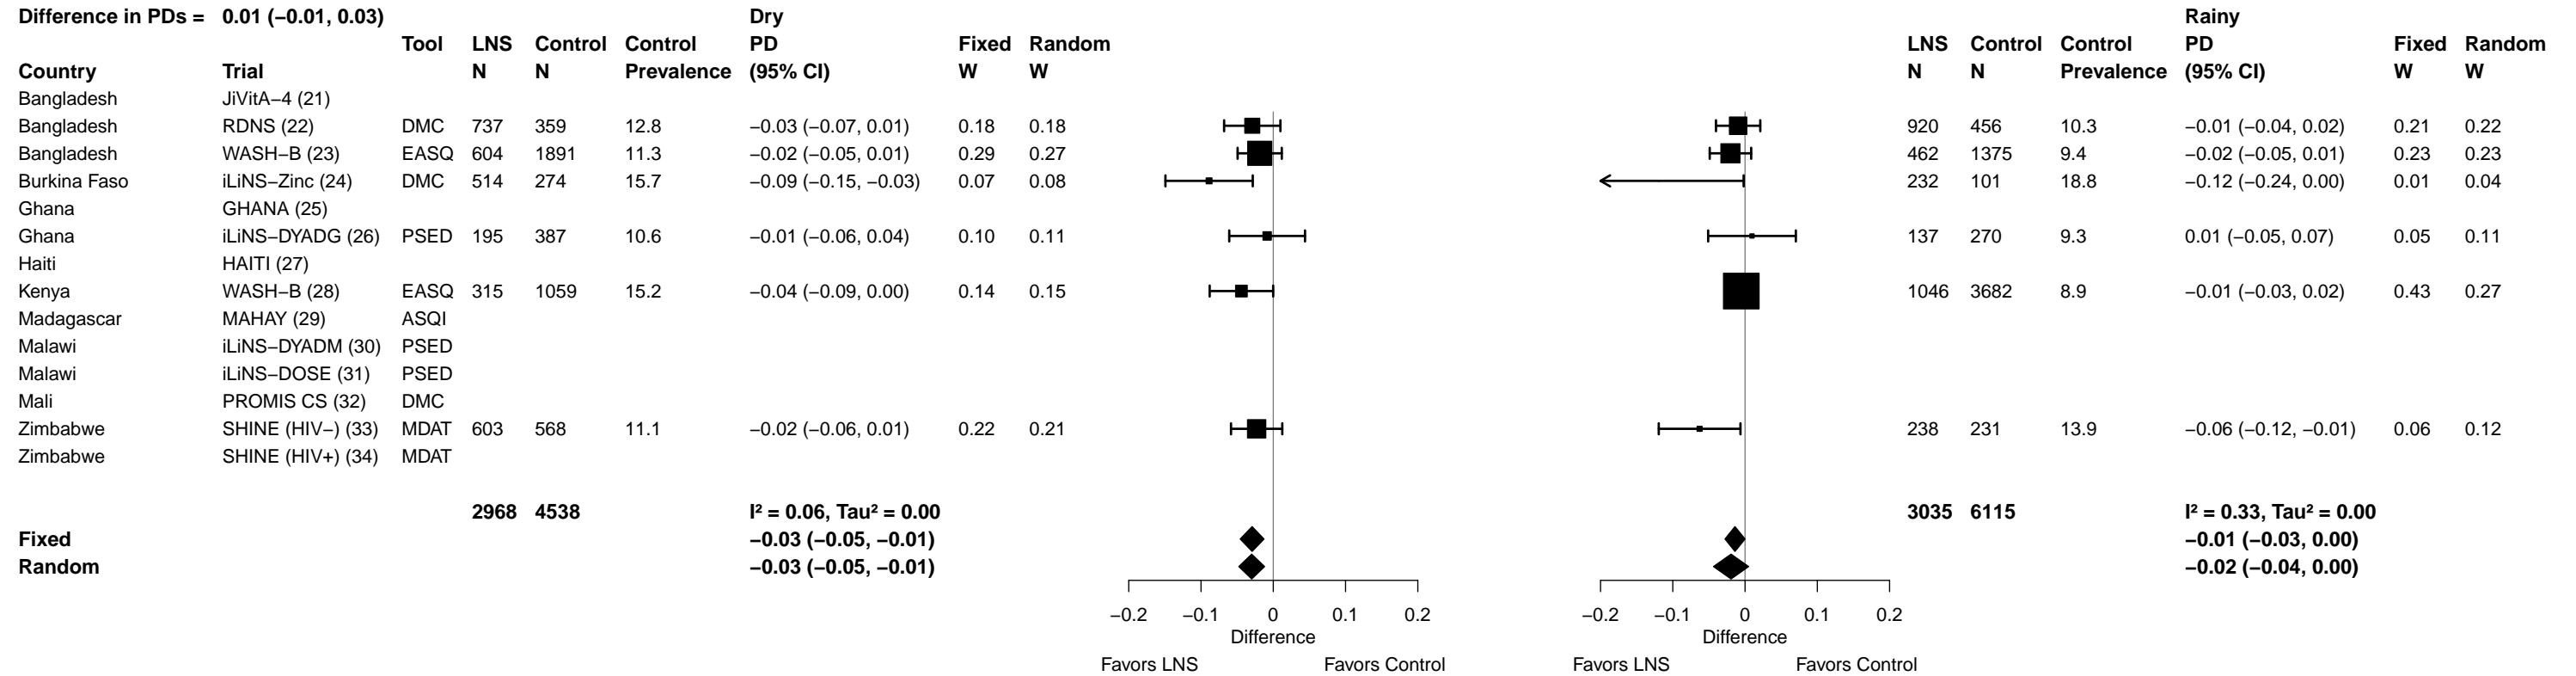



### Supplemental figure 6G: Mean difference in motor z-score

#### 6G1: Stratified by Household socio-economic status

**P-for-interaction = 0.077**  
**Difference in MDs = 0.05 (-0.01, 0.11)**

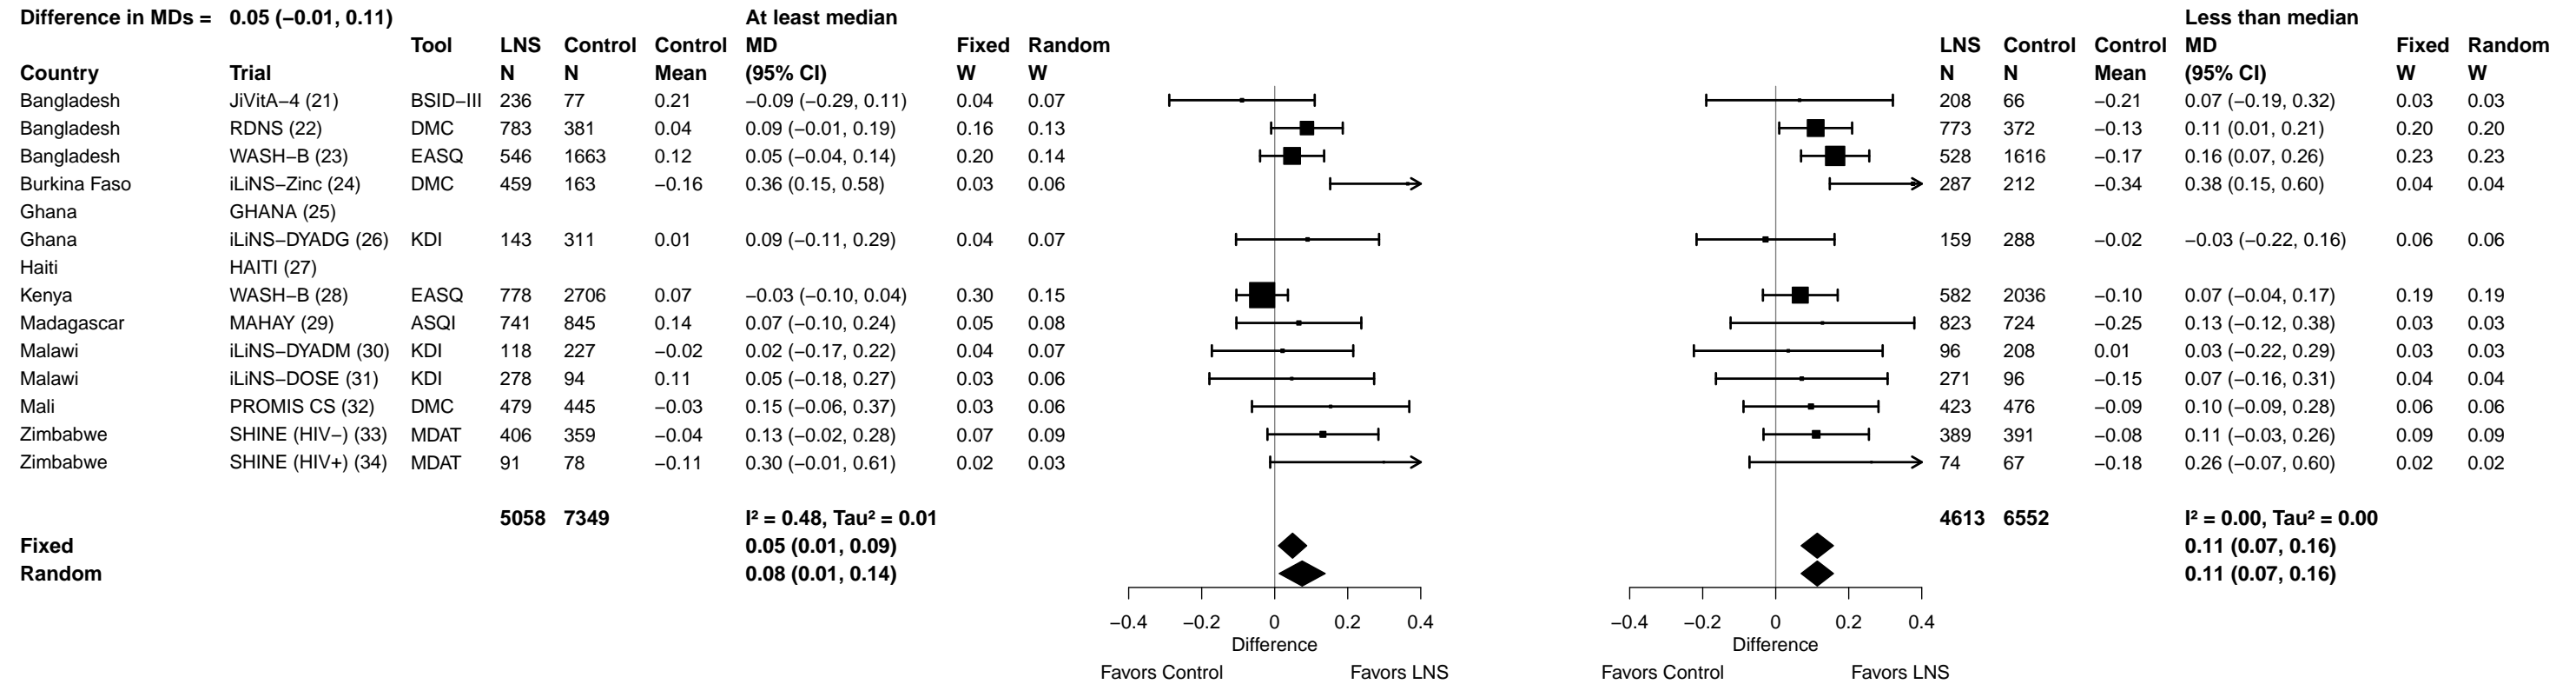

Supplemental figure 6G: Mean difference in motor z-score

6G2: Stratified by Household food insecurity

P-for-interaction = 0.898  
 Difference in MDs = 0.00 (-0.07, 0.08)

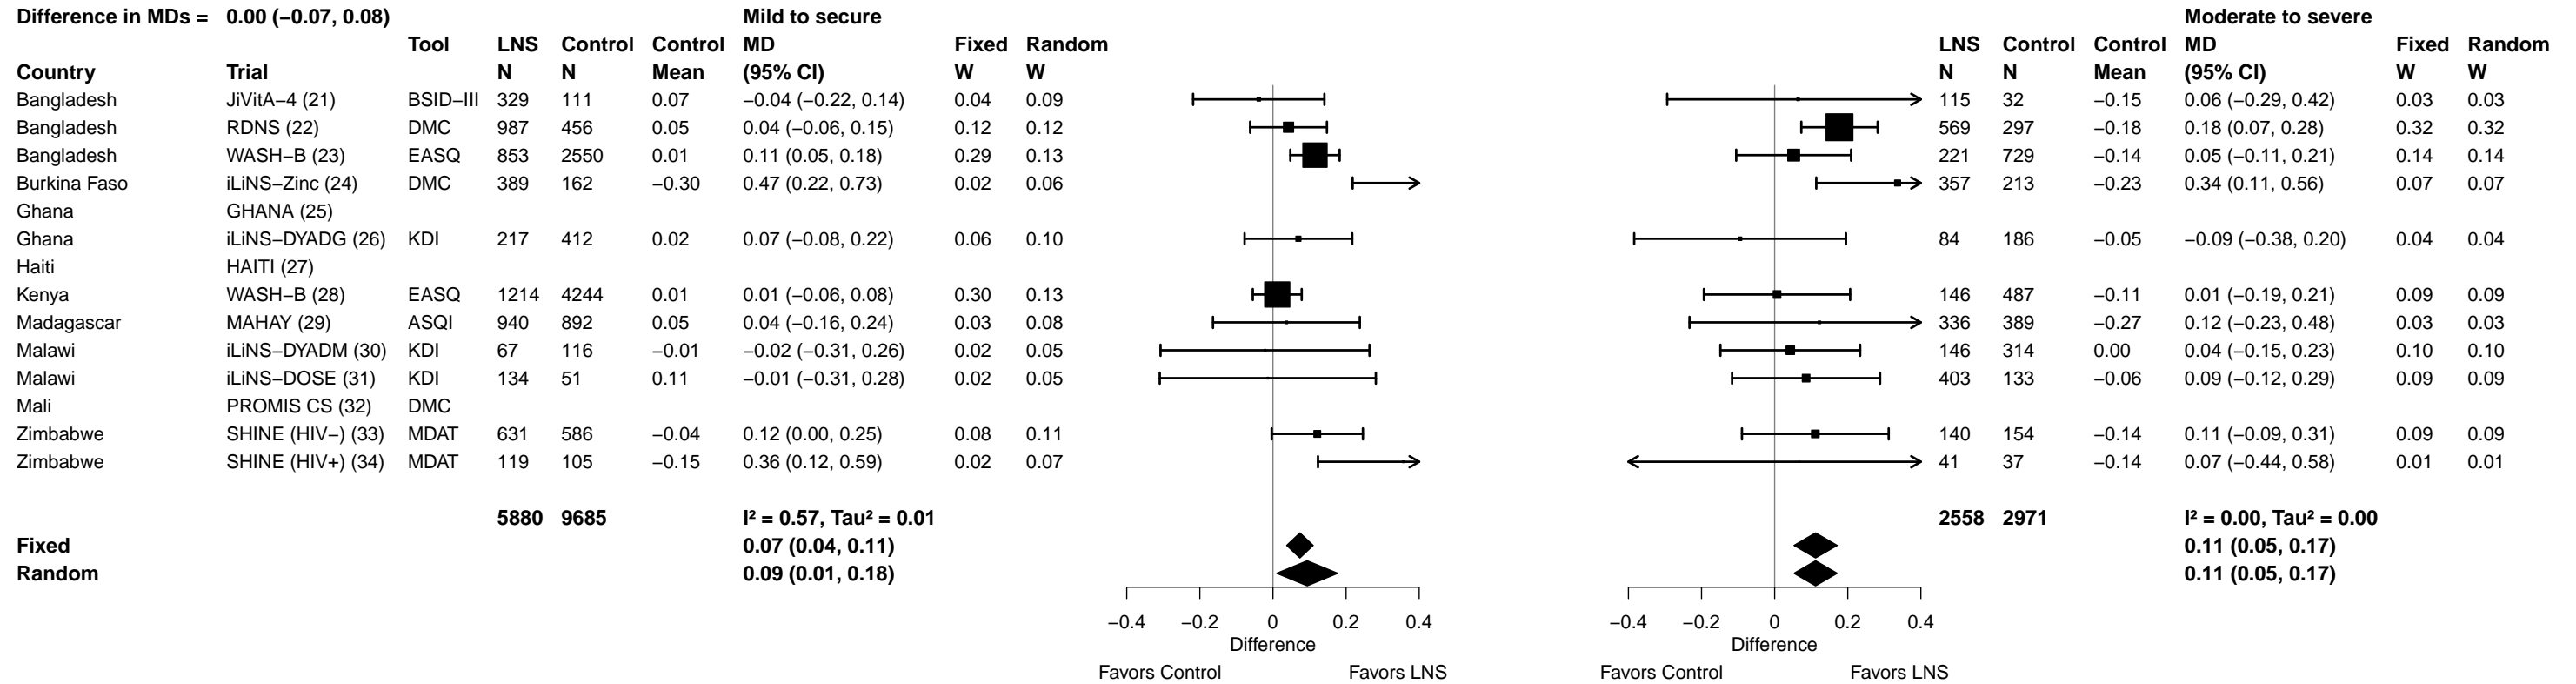

Supplemental figure 6G: Mean difference in motor z-score

6G3: Stratified by Household source water quality

P-for-interaction = 0.514  
 Difference in MDs = 0.04 (-0.07, 0.14)

| Country      | Trial             | Tool     | LNS N | Control N | Control Mean | Improved MD (95% CI) |          | LNS N | Control N | Control Mean | Unimproved MD (95% CI) |             | Fixed W | Random W |
|--------------|-------------------|----------|-------|-----------|--------------|----------------------|----------|-------|-----------|--------------|------------------------|-------------|---------|----------|
|              |                   |          |       |           |              | Fixed W              | Random W |       |           |              | MD (95% CI)            | MD (95% CI) |         |          |
| Bangladesh   | JiVitA-4 (21)     | BSID-III |       |           |              |                      |          |       |           |              |                        |             |         |          |
| Bangladesh   | RDNS (22)         | DMC      |       |           |              |                      |          |       |           |              |                        |             |         |          |
| Bangladesh   | WASH-B (23)       | EASQ     | 460   | 981       | -0.09        | 0.20 (0.08, 0.31)    | 0.25     | 0.21  |           |              |                        |             |         |          |
| Burkina Faso | iLiNS-Zinc (24)   | DMC      | 220   | 82        | -0.07        | 0.32 (0.07, 0.57)    | 0.05     | 0.07  |           |              |                        |             |         |          |
| Ghana        | GHANA (25)        |          |       |           |              |                      |          |       |           |              |                        |             |         |          |
| Ghana        | iLiNS-DYADG (26)  | KDI      |       |           |              |                      |          |       |           |              |                        |             |         |          |
| Haiti        | HAITI (27)        |          |       |           |              |                      |          |       |           |              |                        |             |         |          |
| Kenya        | WASH-B (28)       | EASQ     | 413   | 1419      | -0.01        | 0.02 (-0.10, 0.14)   | 0.25     | 0.21  |           |              |                        |             |         |          |
| Madagascar   | MAHAY (29)        | ASQI     | 405   | 430       | -0.10        | 0.08 (-0.26, 0.41)   | 0.03     | 0.04  |           |              |                        |             |         |          |
| Malawi       | iLiNS-DYADM (30)  | KDI      | 194   | 398       | 0.02         | -0.01 (-0.17, 0.16)  | 0.13     | 0.13  |           |              |                        |             |         |          |
| Malawi       | iLiNS-DOSE (31)   | KDI      | 515   | 177       | 0.00         | 0.06 (-0.11, 0.23)   | 0.12     | 0.13  |           |              |                        |             |         |          |
| Mali         | PROMIS CS (32)    | DMC      | 514   | 539       | -0.04        | 0.16 (-0.07, 0.38)   | 0.07     | 0.08  |           |              |                        |             |         |          |
| Zimbabwe     | SHINE (HIV-) (33) | MDAT     | 228   | 220       | 0.11         | -0.04 (-0.24, 0.16)  | 0.08     | 0.10  |           |              |                        |             |         |          |
| Zimbabwe     | SHINE (HIV+) (34) | MDAT     | 37    | 41        | -0.01        | 0.04 (-0.34, 0.42)   | 0.02     | 0.03  |           |              |                        |             |         |          |

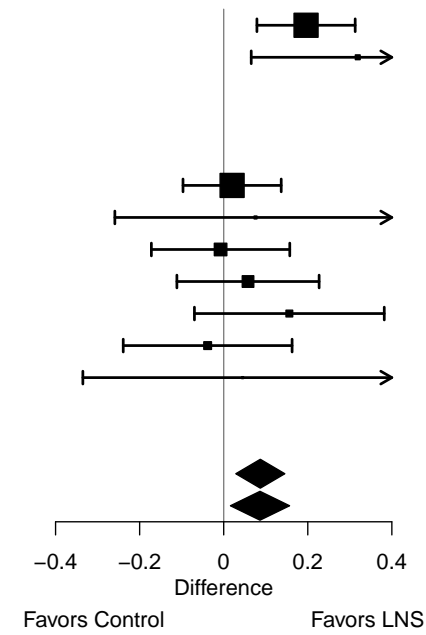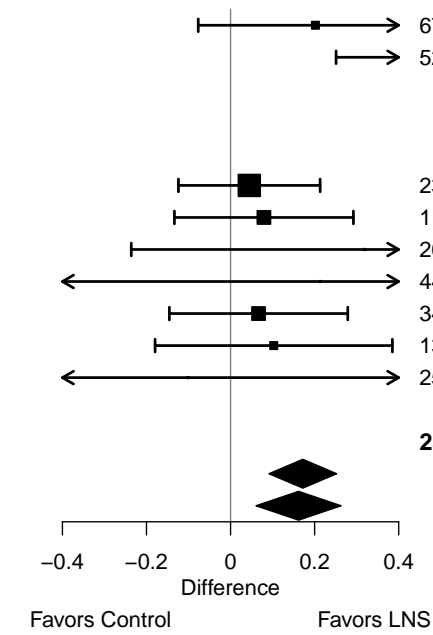

Fixed Random  
 2986 4287  
 I² = 0.28, Tau² = 0.00  
 0.09 (0.03, 0.15)  
 0.09 (0.02, 0.16)

2530 2758  
 I² = 0.42, Tau² = 0.01  
 0.17 (0.09, 0.25)  
 0.16 (0.06, 0.26)

Supplemental figure 6G: Mean difference in motor z-score

6G4: Stratified by Household sanitation

P-for-interaction = 0.193

Difference in MDs = -0.07 (-0.17, 0.03)

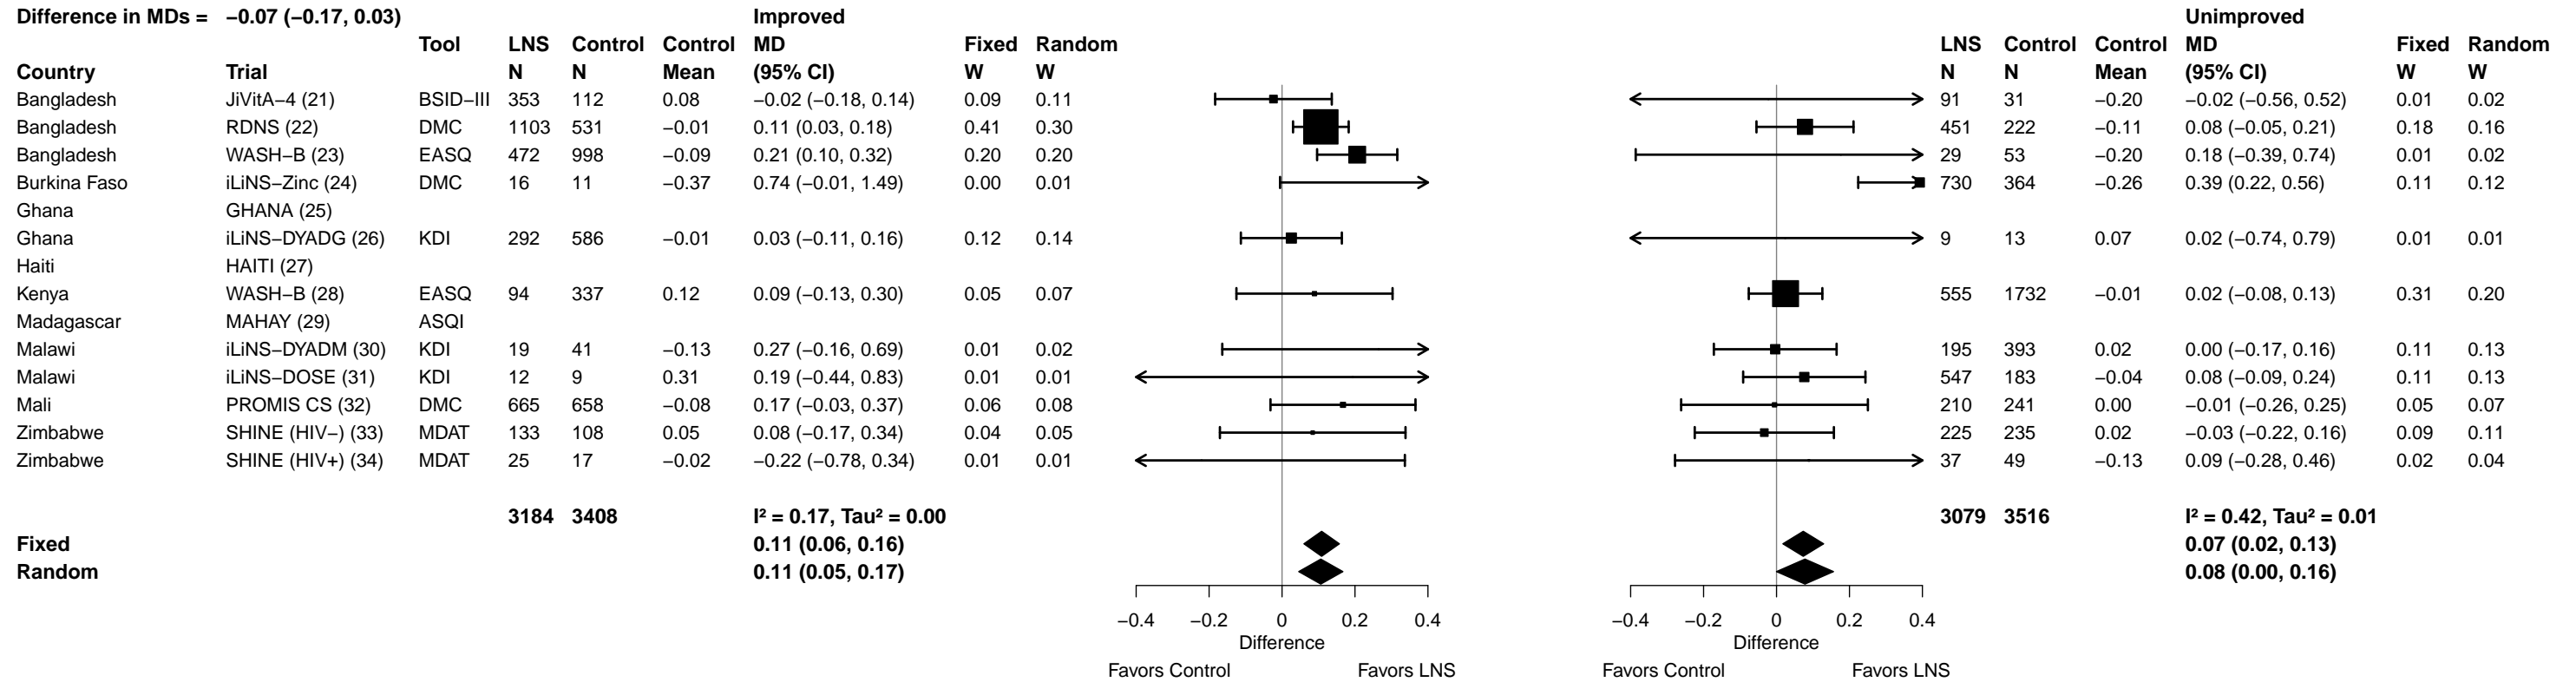

Supplemental figure 6G: Mean difference in motor z-score

6G5: Stratified by Home environment

P-for-interaction = 0.565

Difference in MDs = -0.02 (-0.09, 0.05)

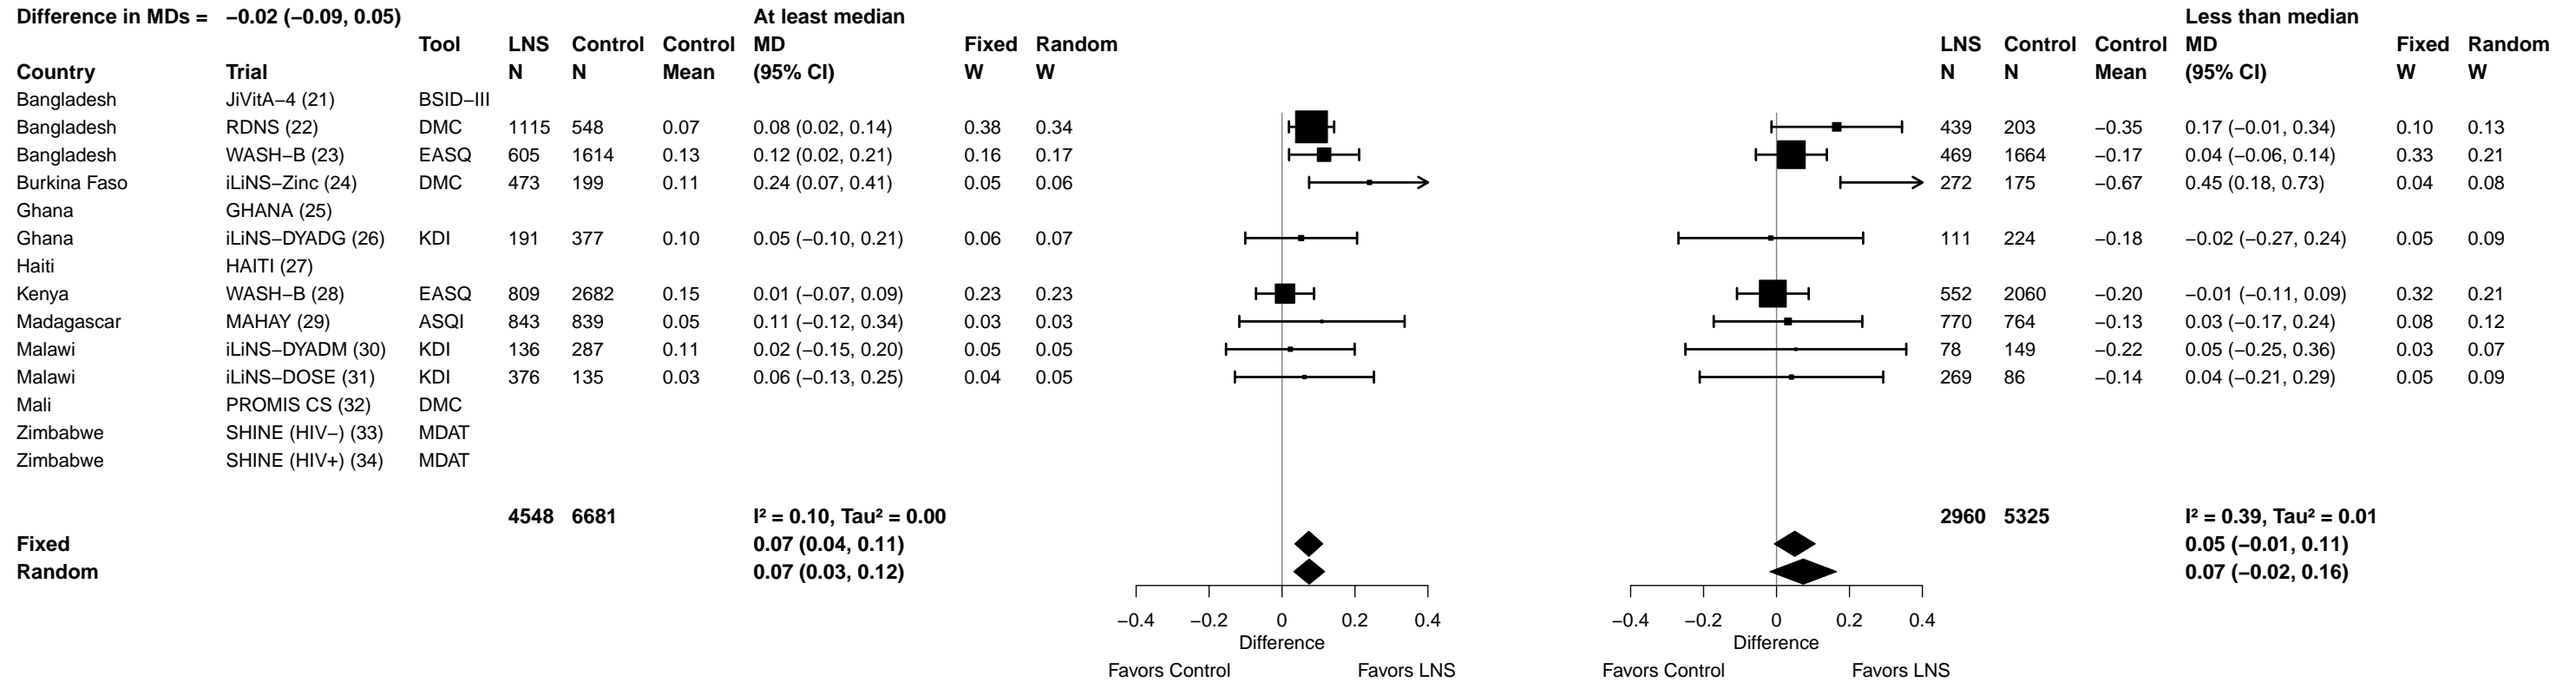

Supplemental figure 6G: Mean difference in motor z-score

6G6: Stratified by Season at the time of assessment

P-for-interaction = 0.827

Difference in MDs = -0.01 (-0.07, 0.05)

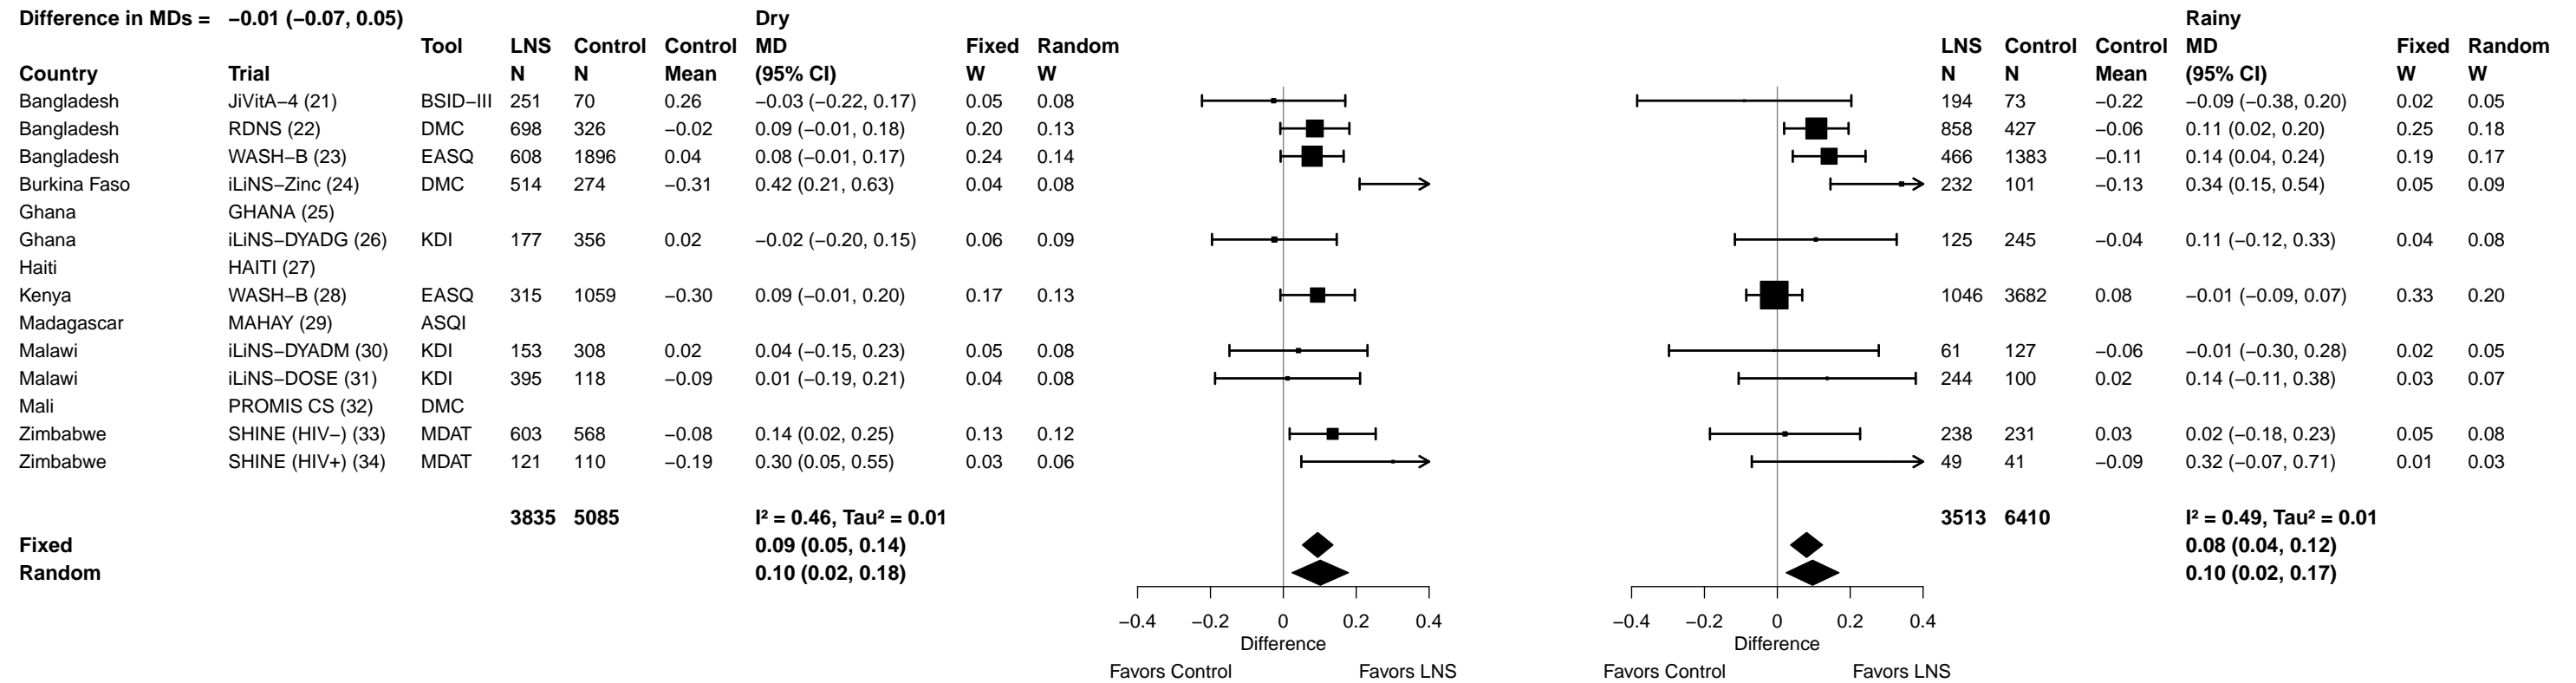

### Supplemental figure 6H: Motor lowest decile prevalence ratio

#### 6H1: Stratified by Household socio-economic status

P-for-interaction = 0.878  
 Ratio of PRs = 0.99 (0.83, 1.17)

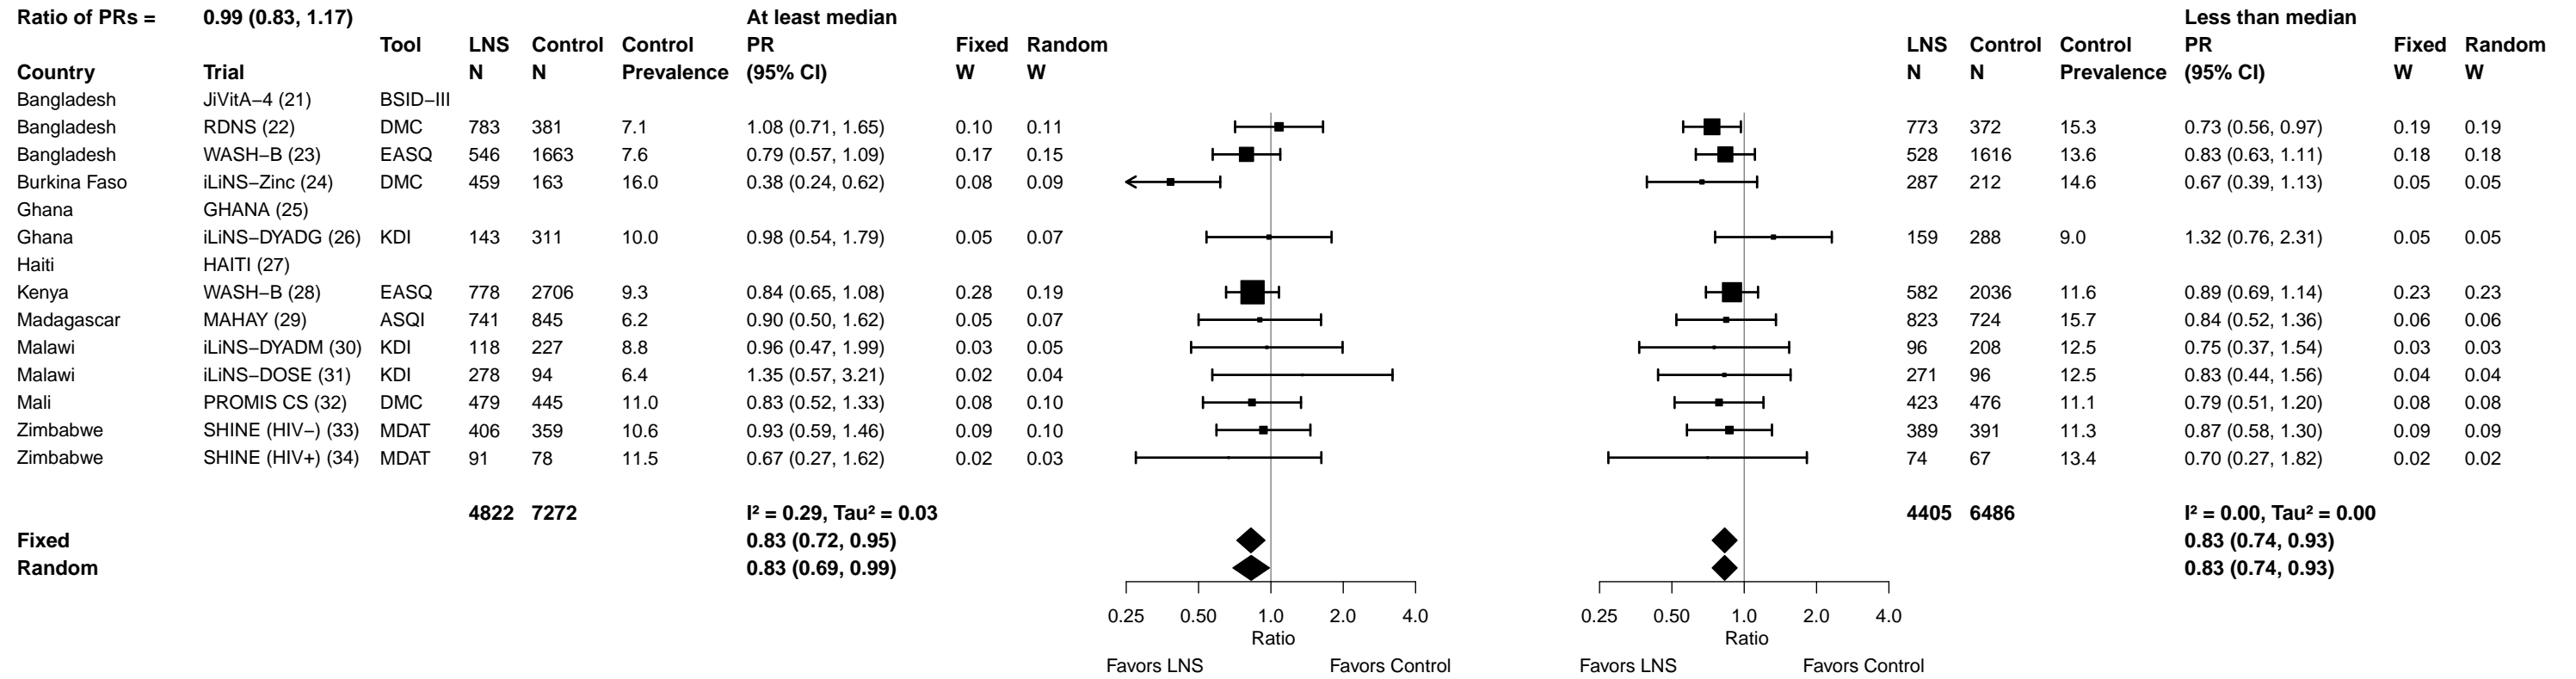

Supplemental figure 6H: Motor lowest decile prevalence ratio

6H2: Stratified by Household food insecurity

P-for-interaction = 0.594  
 Ratio of PRs = 0.94 (0.75, 1.18)

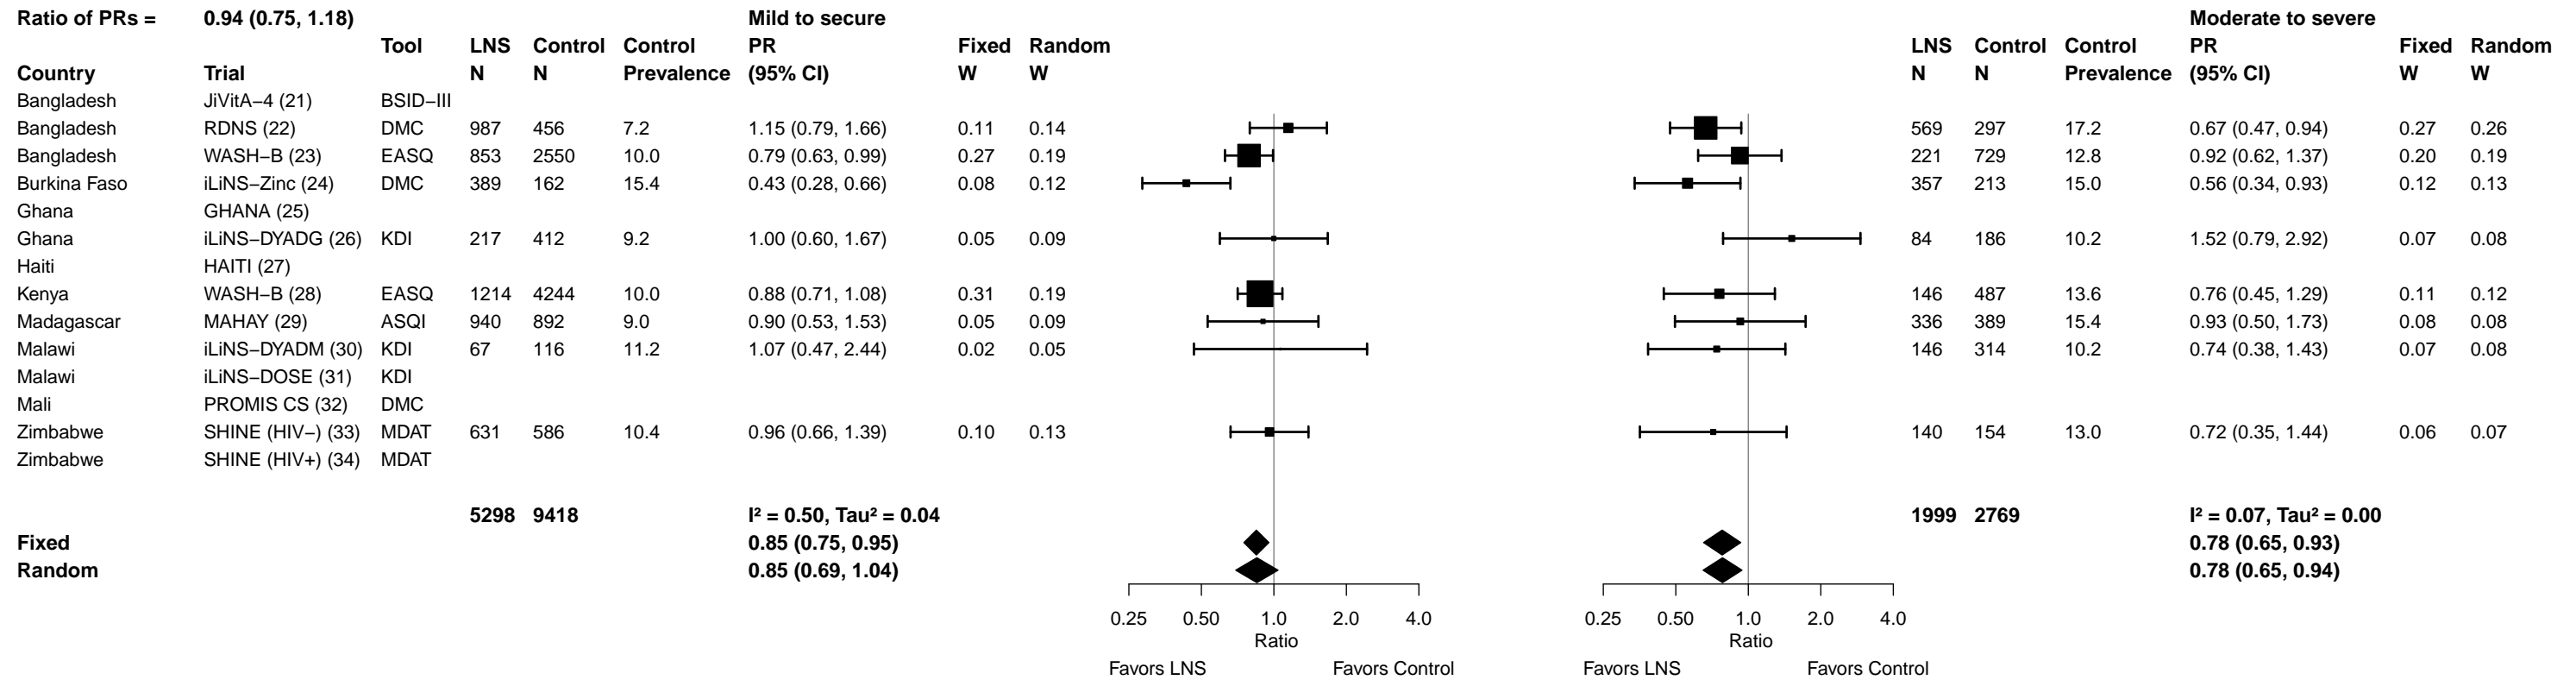



Supplemental figure 6H: Motor lowest decile prevalence ratio

6H3: Stratified by Household source water quality

P-for-interaction = 0.723  
 Ratio of PRs = 1.06 (0.78, 1.42)

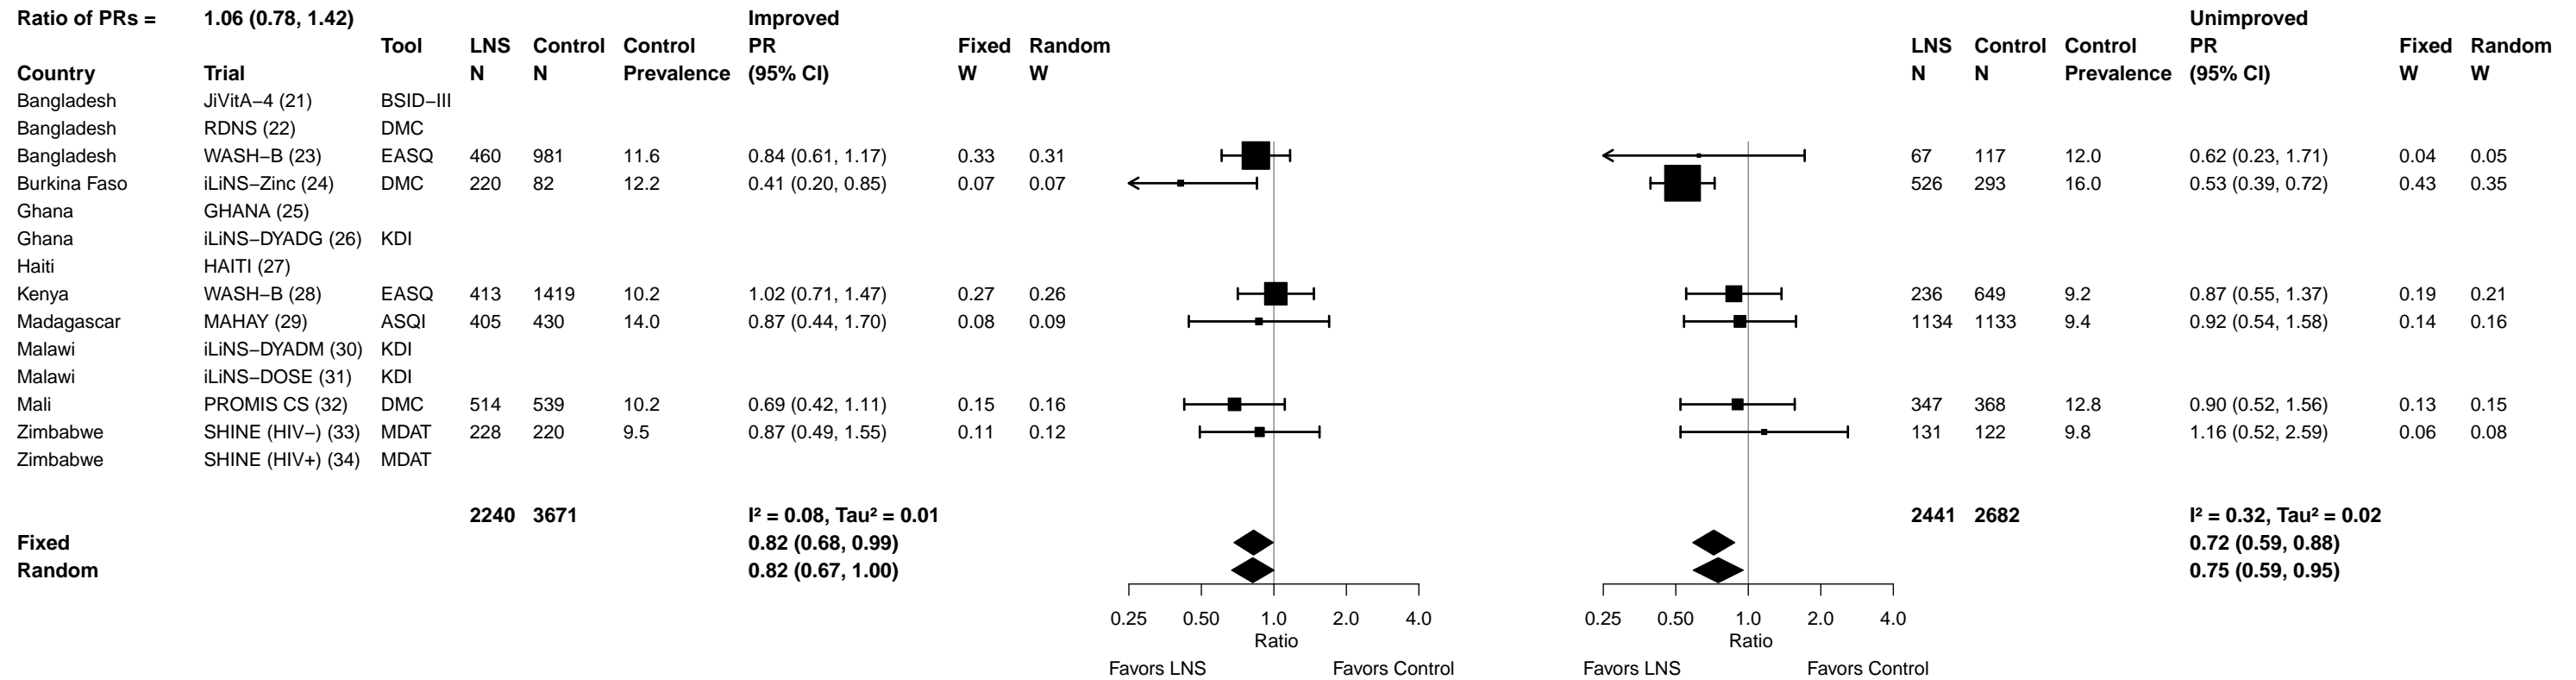

Supplemental figure 6H: Motor lowest decile prevalence ratio

6H4: Stratified by Household sanitation

**P-for-interaction = 0.228**  
**Ratio of PRs = 1.24 (0.87, 1.76)**

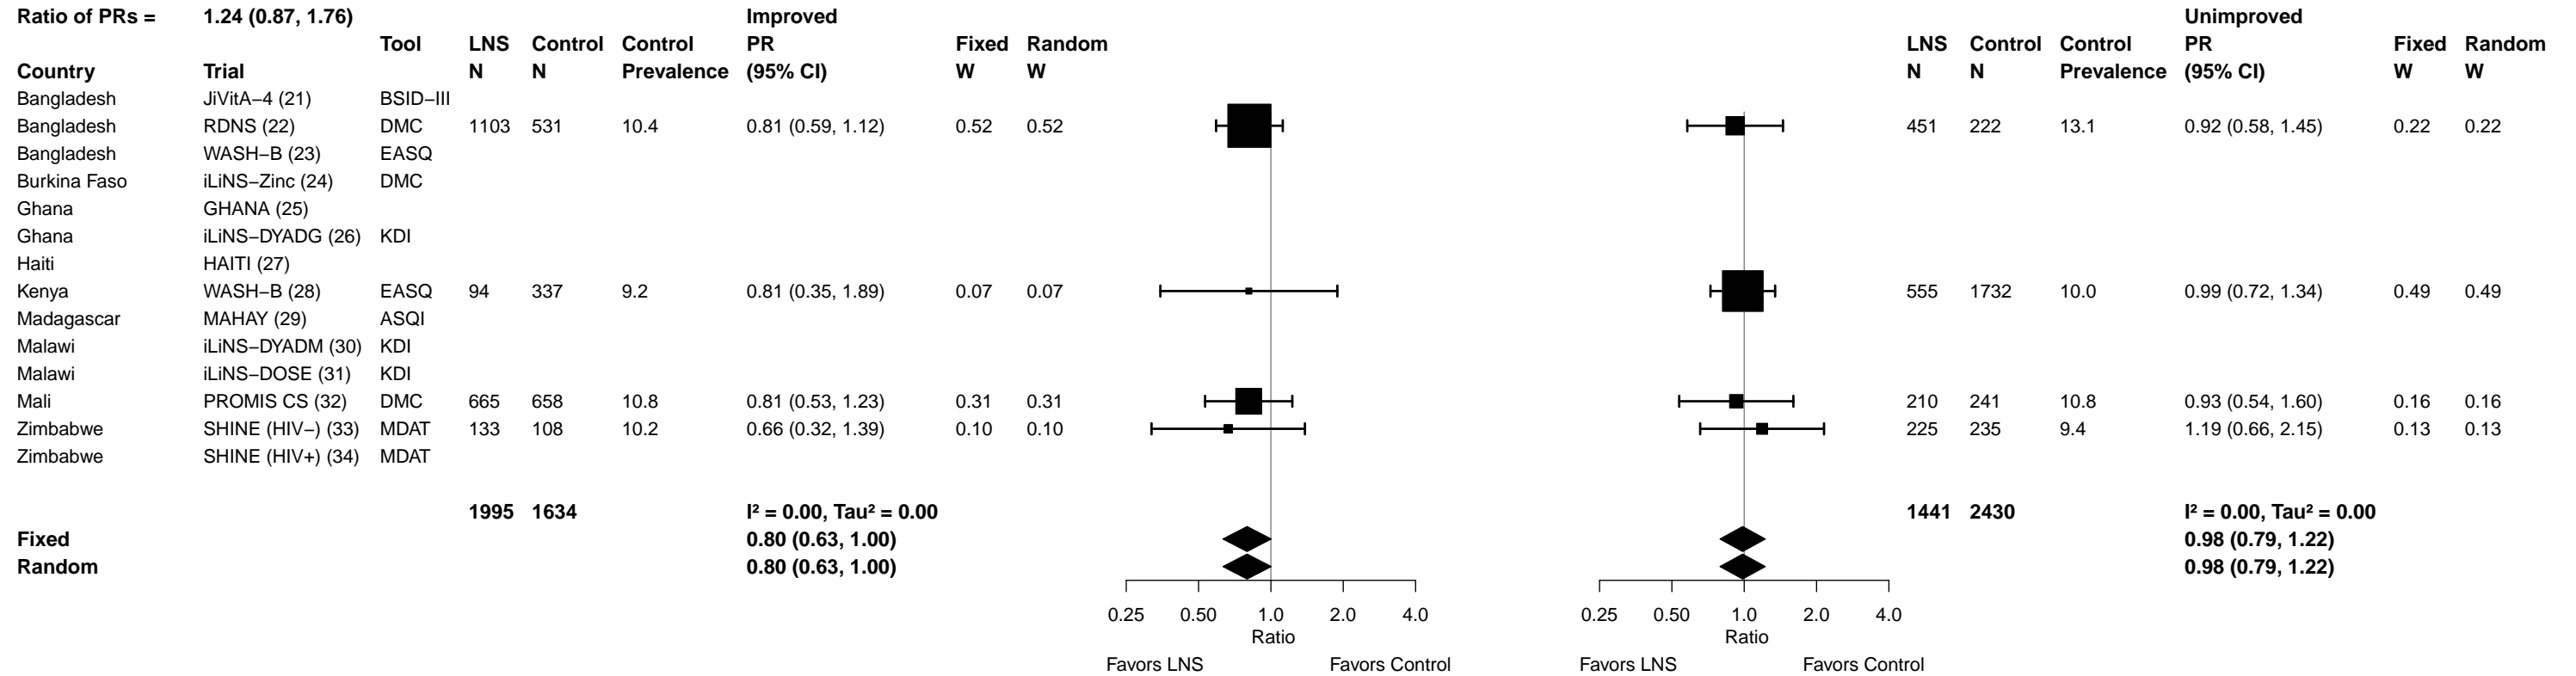

Supplemental figure 6H: Motor lowest decile prevalence ratio

6H5: Stratified by Home environment

P-for-interaction = 0.766  
 Ratio of PRs = 1.03 (0.84, 1.27)

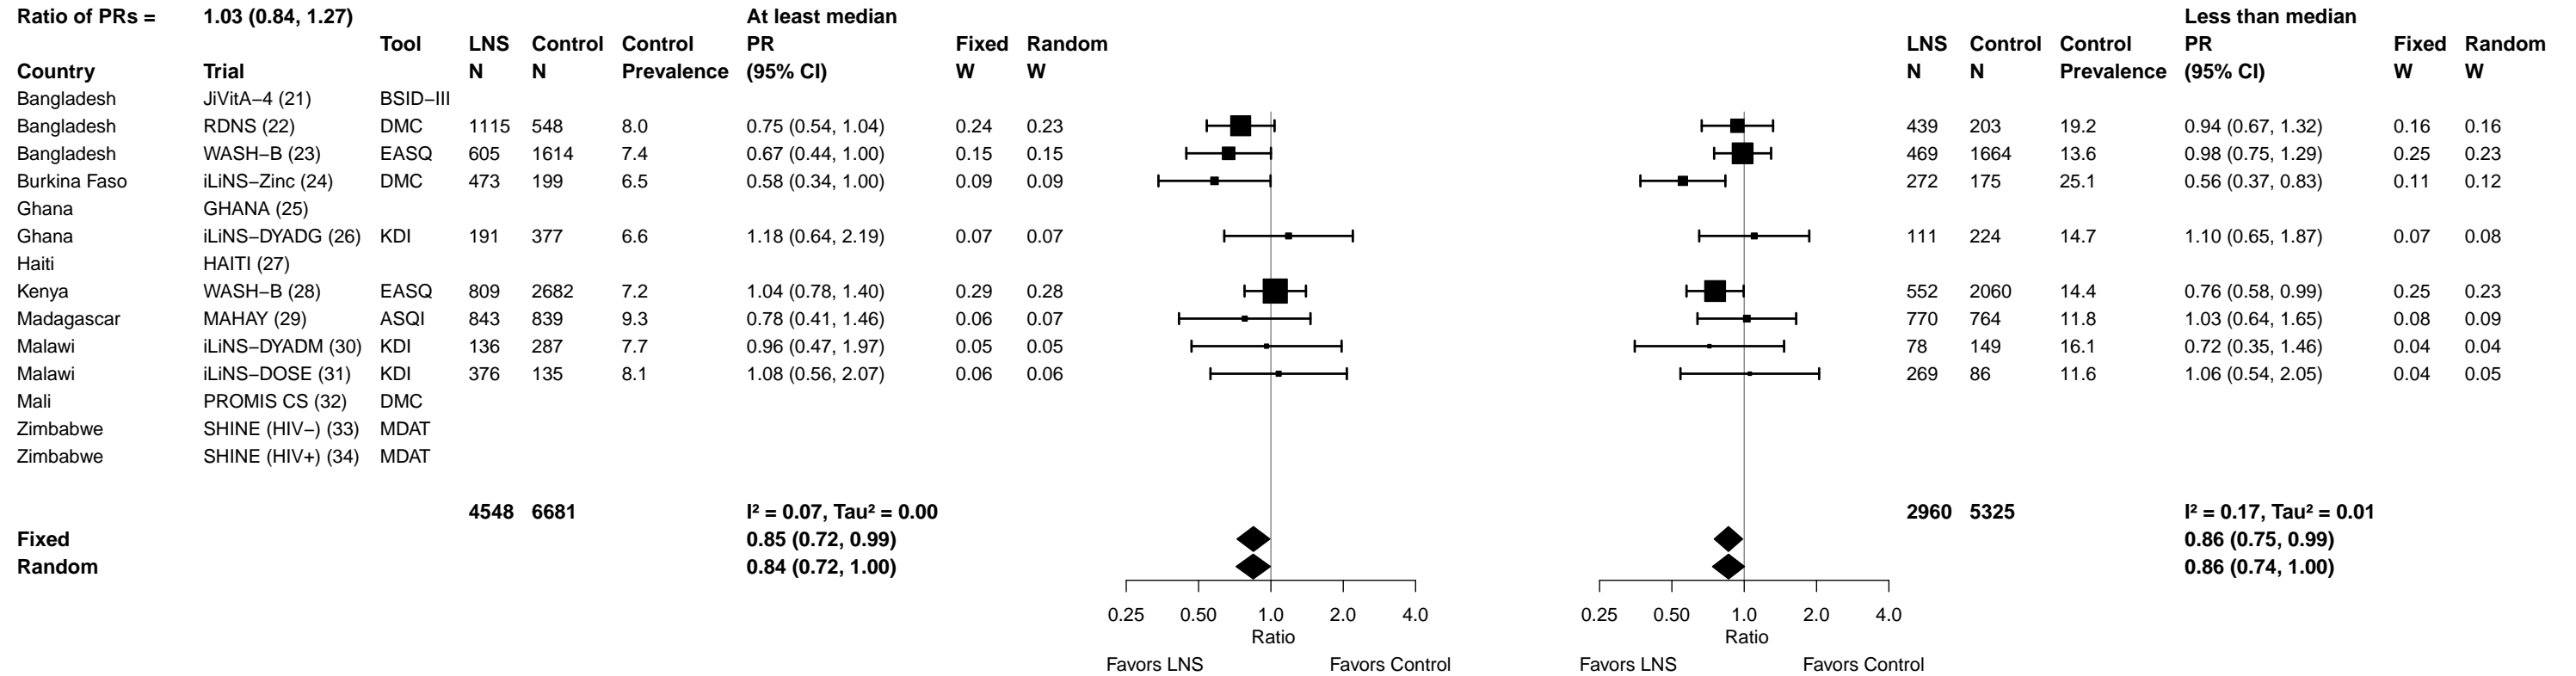

Supplemental figure 6H: Motor lowest decile prevalence ratio

6H6: Stratified by Season at the time of assessment

P-for-interaction = 0.839  
 Ratio of PRs = 1.02 (0.83, 1.26)

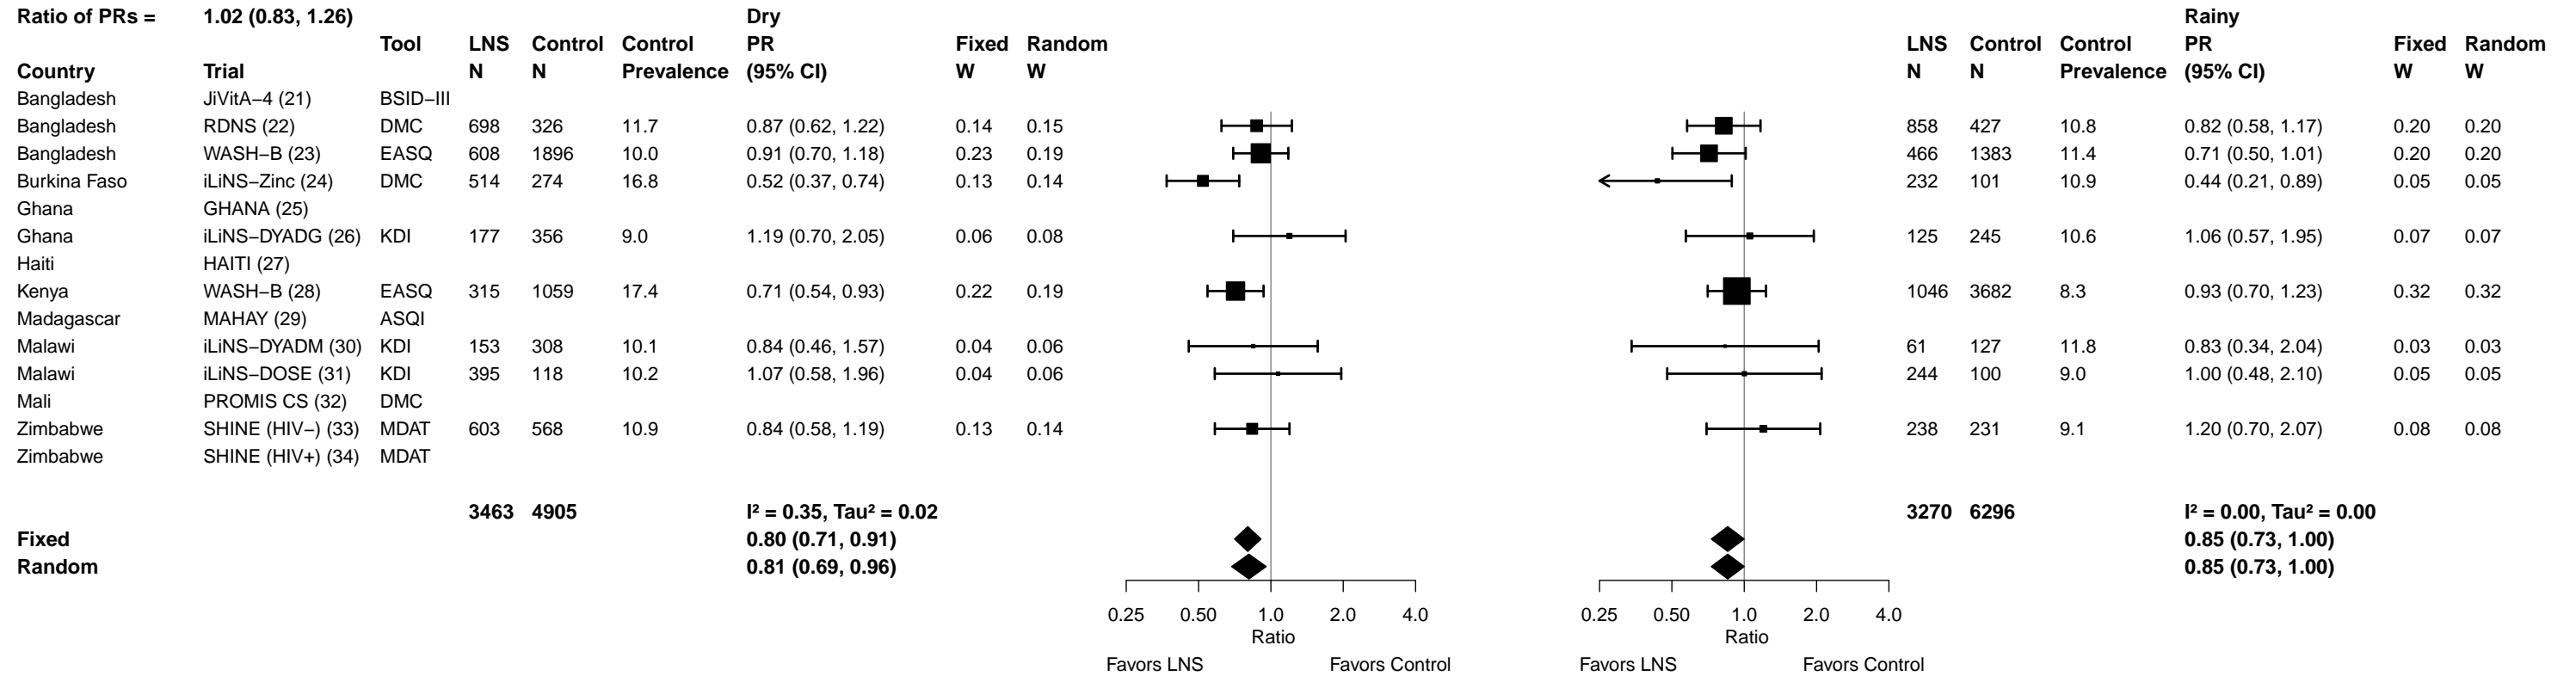

### Supplemental figure 6I: Motor lowest decile prevalence difference

#### 6I1: Stratified by Household socio-economic status

P-for-interaction = 0.325  
 Difference in PDs = -0.01 (-0.03, 0.01)

| Country       | Trial             | Tool     | LNS N       | Control N   | Control Prevalence | At least median PD (95% CI)                         |          | LNS N       | Control N   | Control Prevalence | Less than median PD (95% CI)                        |          |      |
|---------------|-------------------|----------|-------------|-------------|--------------------|-----------------------------------------------------|----------|-------------|-------------|--------------------|-----------------------------------------------------|----------|------|
|               |                   |          |             |             |                    | Fixed W                                             | Random W |             |             |                    | Fixed W                                             | Random W |      |
| Bangladesh    | JiVitA-4 (21)     | BSID-III |             |             |                    |                                                     |          |             |             |                    |                                                     |          |      |
| Bangladesh    | RDNS (22)         | DMC      | 783         | 381         | 7.1                | 0.12                                                | 0.13     | 773         | 372         | 15.3               | -0.04 (-0.08, 0.00)                                 | 0.14     | 0.14 |
| Bangladesh    | WASH-B (23)       | EASQ     | 546         | 1663        | 7.6                | 0.27                                                | 0.19     | 528         | 1616        | 13.6               | -0.02 (-0.06, 0.01)                                 | 0.17     | 0.17 |
| Burkina Faso  | iLiNS-Zinc (24)   | DMC      | 459         | 163         | 16.0               | 0.04                                                | 0.05     | 287         | 212         | 14.6               | -0.05 (-0.11, 0.01)                                 | 0.05     | 0.05 |
| Ghana         | GHANA (25)        |          |             |             |                    |                                                     |          |             |             |                    |                                                     |          |      |
| Ghana         | iLiNS-DYADG (26)  | KDI      | 143         | 311         | 10.0               | 0.03                                                | 0.05     | 159         | 288         | 9.0                | 0.03 (-0.03, 0.09)                                  | 0.05     | 0.05 |
| Haiti         | HAITI (27)        |          |             |             |                    |                                                     |          |             |             |                    |                                                     |          |      |
| Kenya         | WASH-B (28)       | EASQ     | 778         | 2706        | 9.3                | 0.26                                                | 0.19     | 582         | 2036        | 11.6               | -0.01 (-0.04, 0.01)                                 | 0.26     | 0.26 |
| Madagascar    | MAHAY (29)        | ASQI     | 741         | 845         | 6.2                | 0.10                                                | 0.12     | 823         | 724         | 15.7               | -0.03 (-0.09, 0.04)                                 | 0.04     | 0.04 |
| Malawi        | iLiNS-DYADM (30)  | KDI      | 118         | 227         | 8.8                | 0.03                                                | 0.05     | 96          | 208         | 12.5               | -0.03 (-0.11, 0.05)                                 | 0.03     | 0.03 |
| Malawi        | iLiNS-DOSE (31)   | KDI      | 278         | 94          | 6.4                | 0.03                                                | 0.04     | 271         | 96          | 12.5               | -0.02 (-0.09, 0.05)                                 | 0.04     | 0.04 |
| Mali          | PROMIS CS (32)    | DMC      | 479         | 445         | 11.0               | 0.05                                                | 0.07     | 423         | 476         | 11.1               | -0.02 (-0.06, 0.02)                                 | 0.11     | 0.11 |
| Zimbabwe      | SHINE (HIV-) (33) | MDAT     | 406         | 359         | 10.6               | 0.05                                                | 0.08     | 389         | 391         | 11.3               | -0.01 (-0.06, 0.03)                                 | 0.10     | 0.10 |
| Zimbabwe      | SHINE (HIV+) (34) | MDAT     | 91          | 78          | 11.5               | 0.02                                                | 0.03     | 74          | 67          | 13.4               | -0.04 (-0.14, 0.06)                                 | 0.02     | 0.02 |
|               |                   |          | <b>4822</b> | <b>7272</b> |                    | <b>I<sup>2</sup> = 0.20, Tau<sup>2</sup> = 0.00</b> |          | <b>4405</b> | <b>6486</b> |                    | <b>I<sup>2</sup> = 0.00, Tau<sup>2</sup> = 0.00</b> |          |      |
| <b>Fixed</b>  |                   |          |             |             |                    | <b>-0.01 (-0.02, 0.00)</b>                          |          |             |             |                    | <b>-0.02 (-0.03, -0.01)</b>                         |          |      |
| <b>Random</b> |                   |          |             |             |                    | <b>-0.01 (-0.03, 0.00)</b>                          |          |             |             |                    | <b>-0.02 (-0.03, -0.01)</b>                         |          |      |

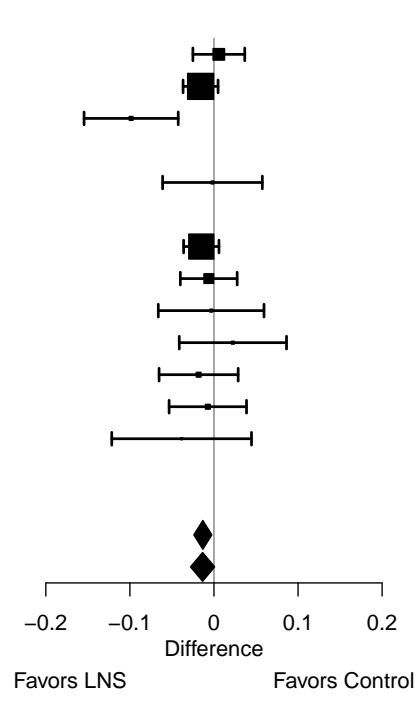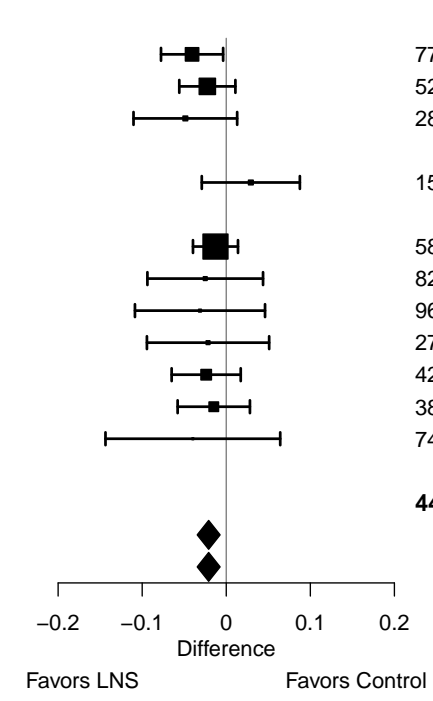

Supplemental figure 6I: Motor lowest decile prevalence difference

6I2: Stratified by Household food insecurity

P-for-interaction = 0.291  
 Difference in PDs = -0.01 (-0.04, 0.01)

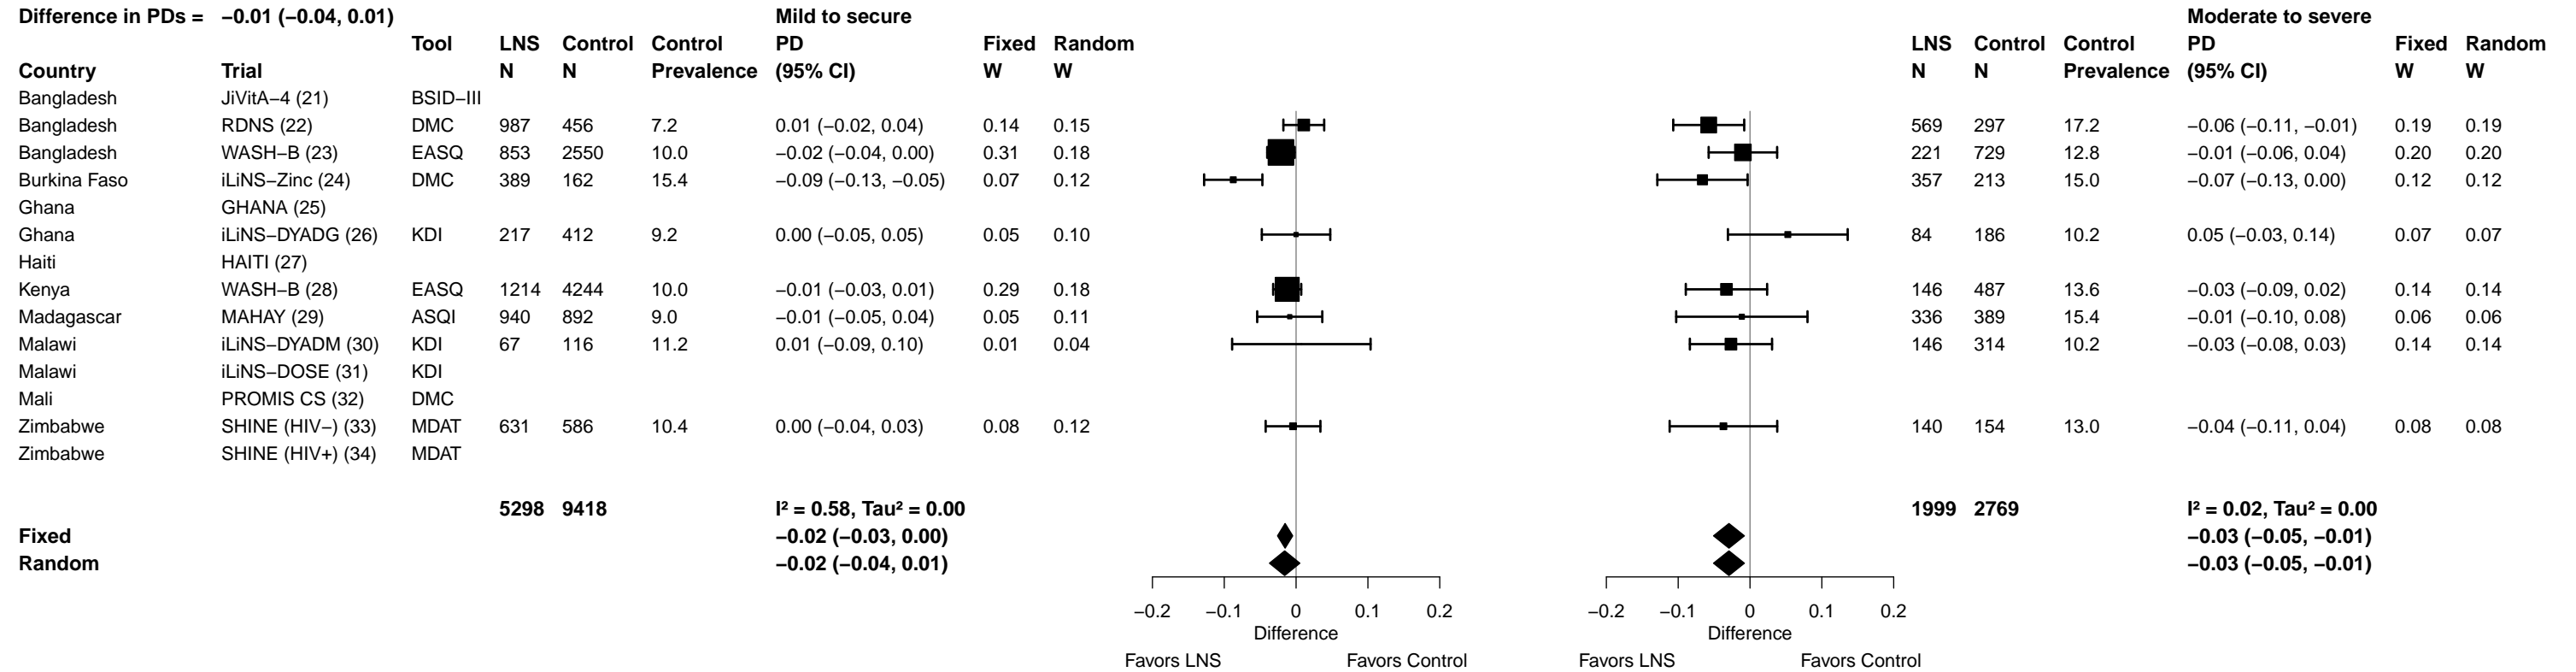

Supplemental figure 6I: Motor lowest decile prevalence difference

6I3: Stratified by Household source water quality

P-for-interaction = 0.795

Difference in PDs = 0.00 (-0.02, 0.03)

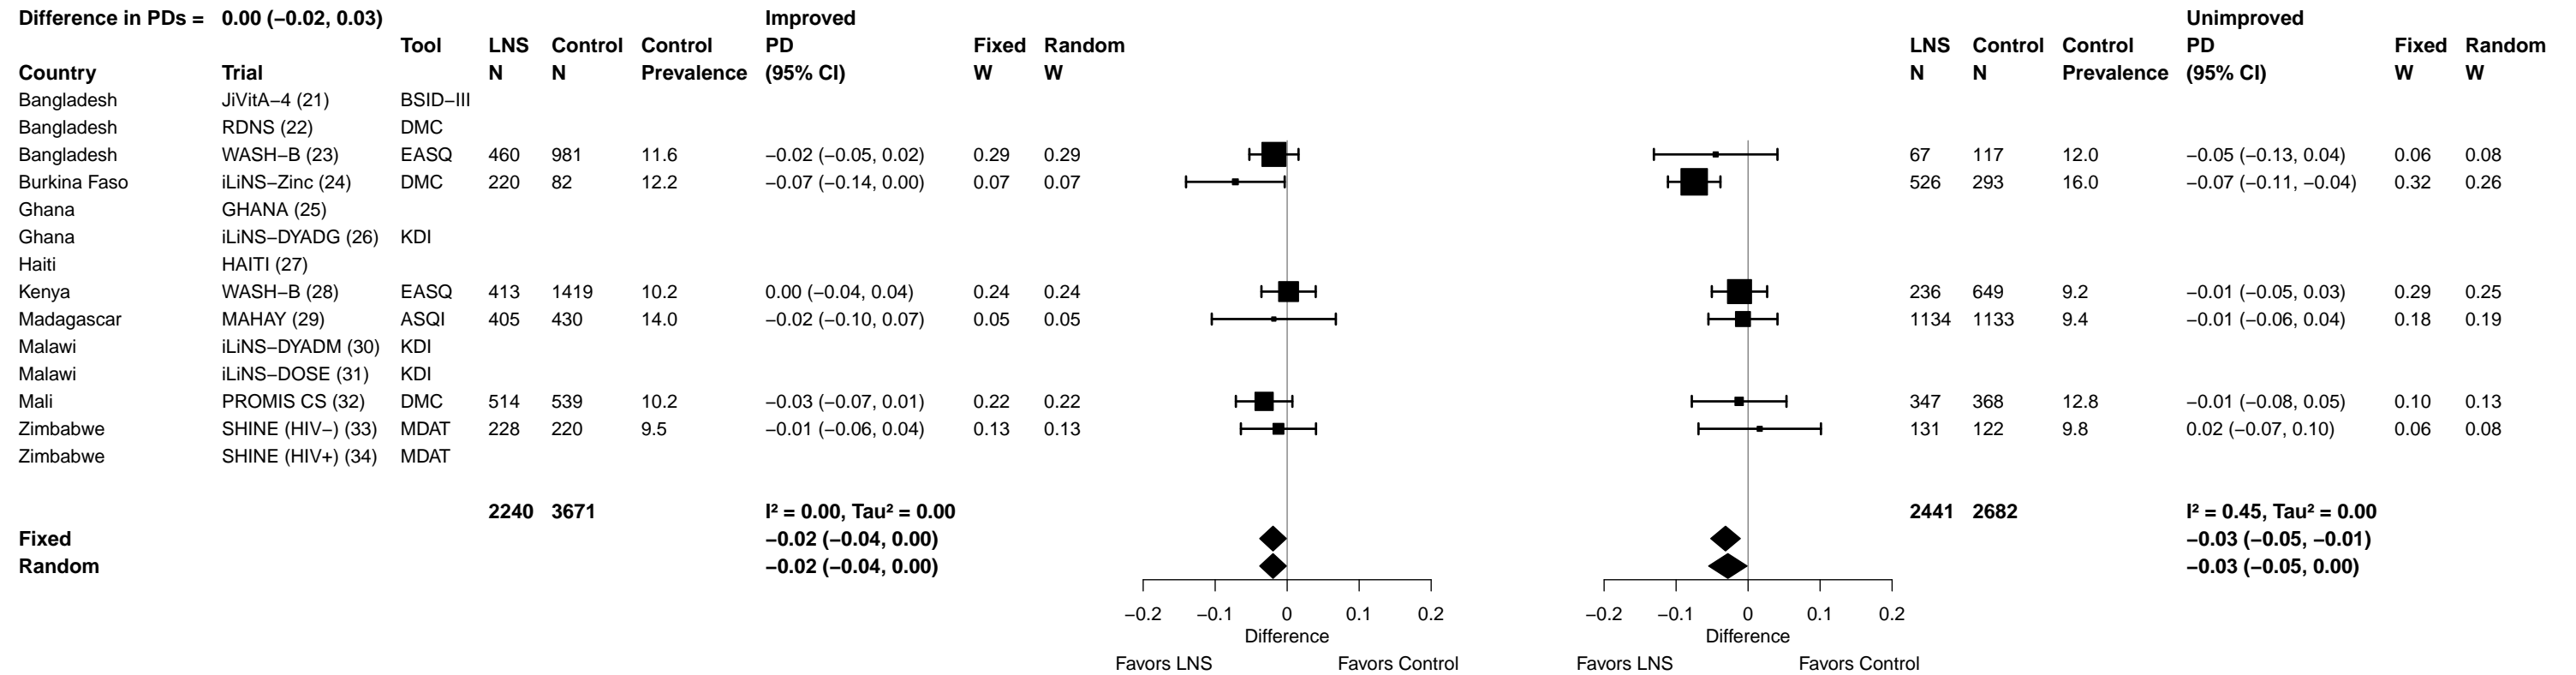

Supplemental figure 6I: Motor lowest decile prevalence difference

6I4: Stratified by Household sanitation

**P-for-interaction = 0.308**  
**Difference in PDs = 0.02 (-0.02, 0.05)**

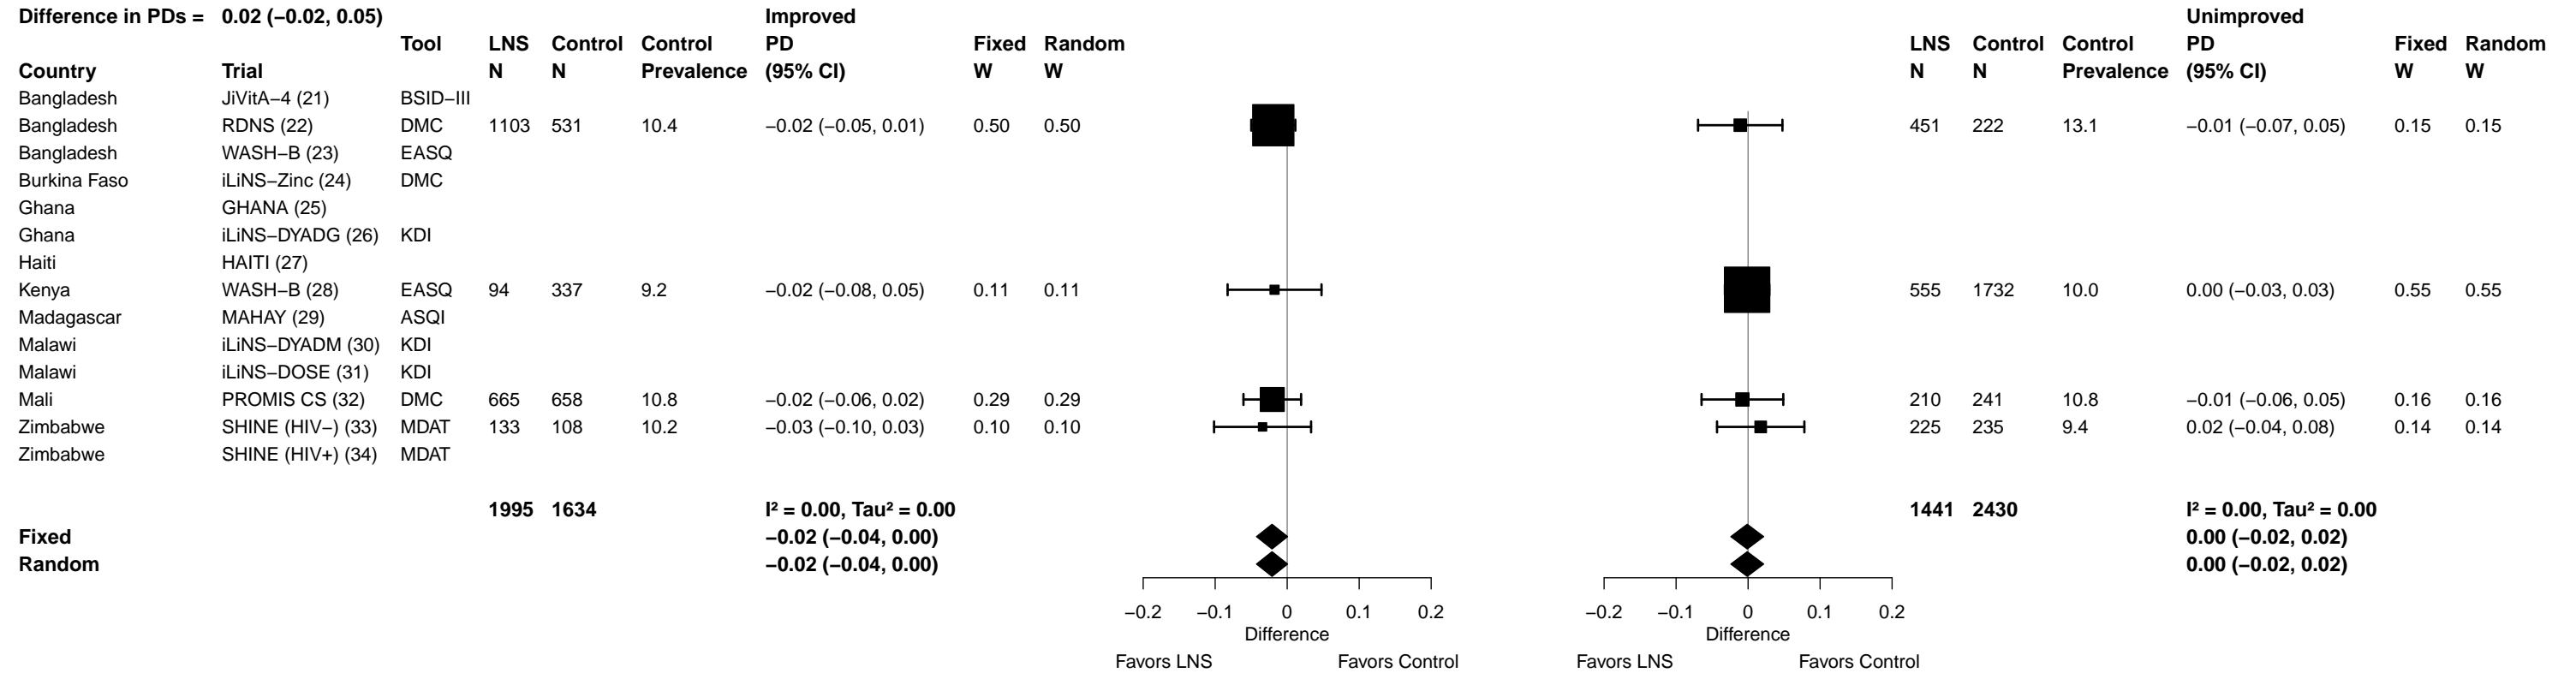



Supplemental figure 6I: Motor lowest decile prevalence difference

6I5: Stratified by Home environment

P-for-interaction = 0.562  
 Difference in PDs = -0.01 (-0.03, 0.01)

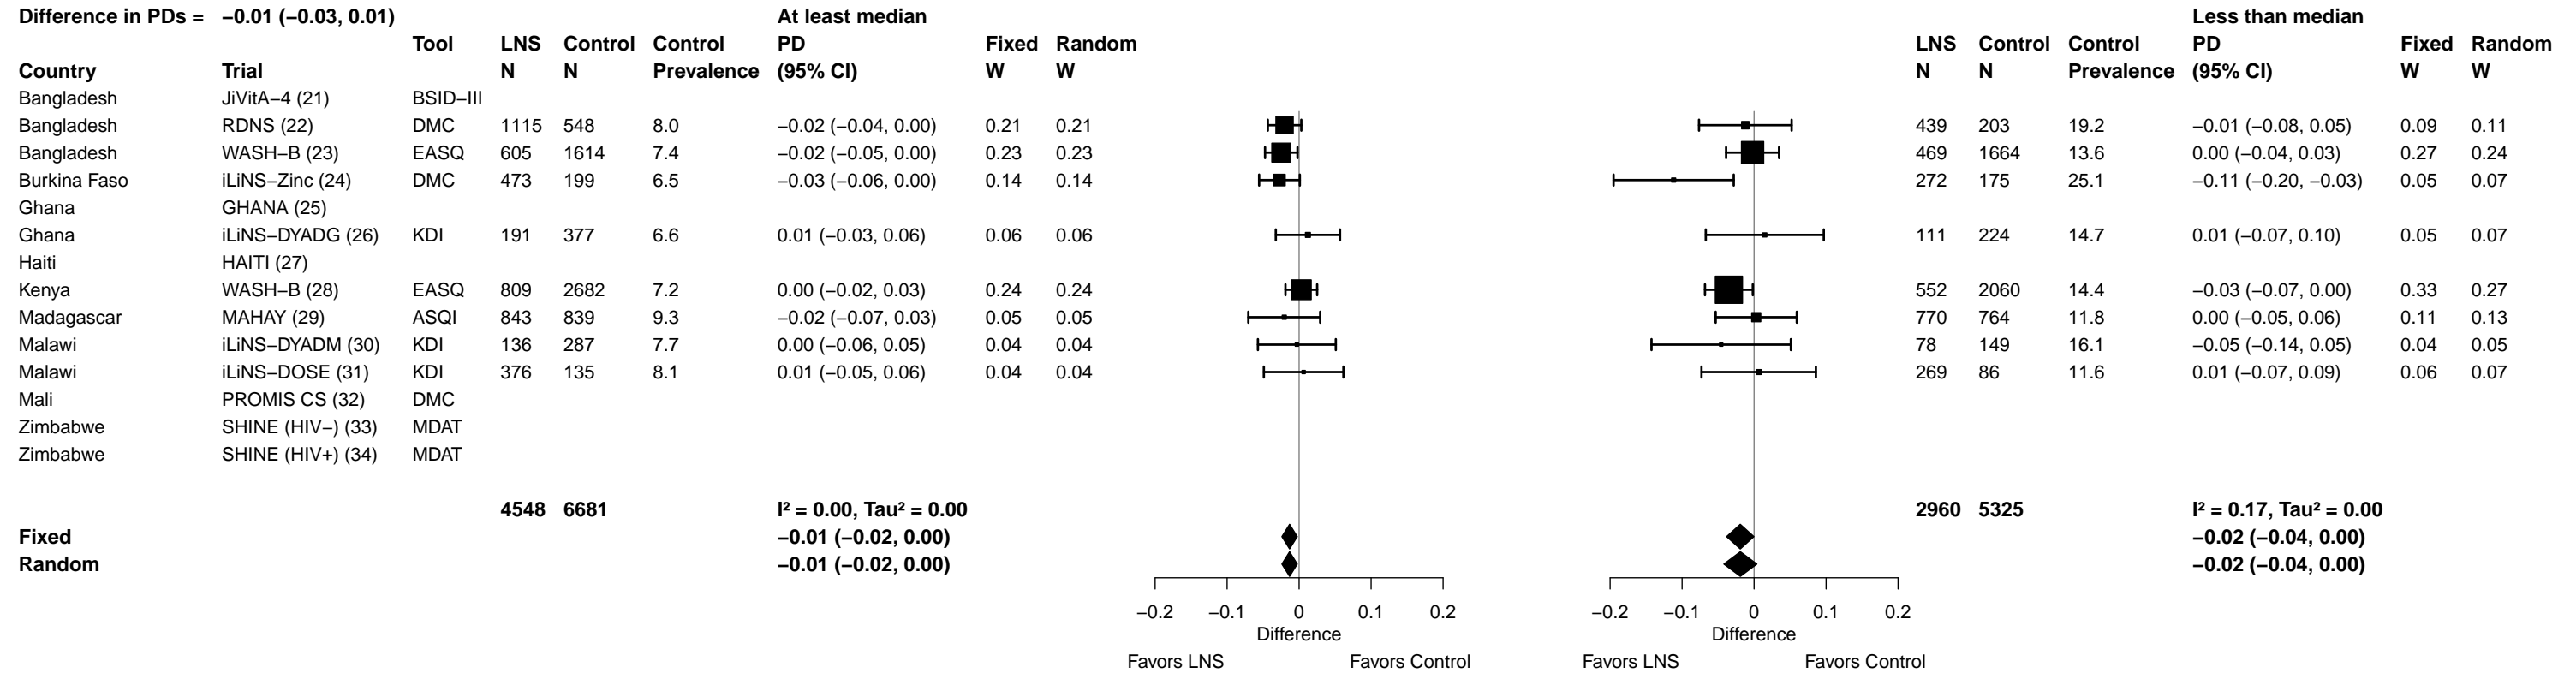

Supplemental figure 6I: Motor lowest decile prevalence difference

6I6: Stratified by Season at the time of assessment

**P-for-interaction = 0.586**  
**Difference in PDs = 0.01 (-0.02, 0.03)**

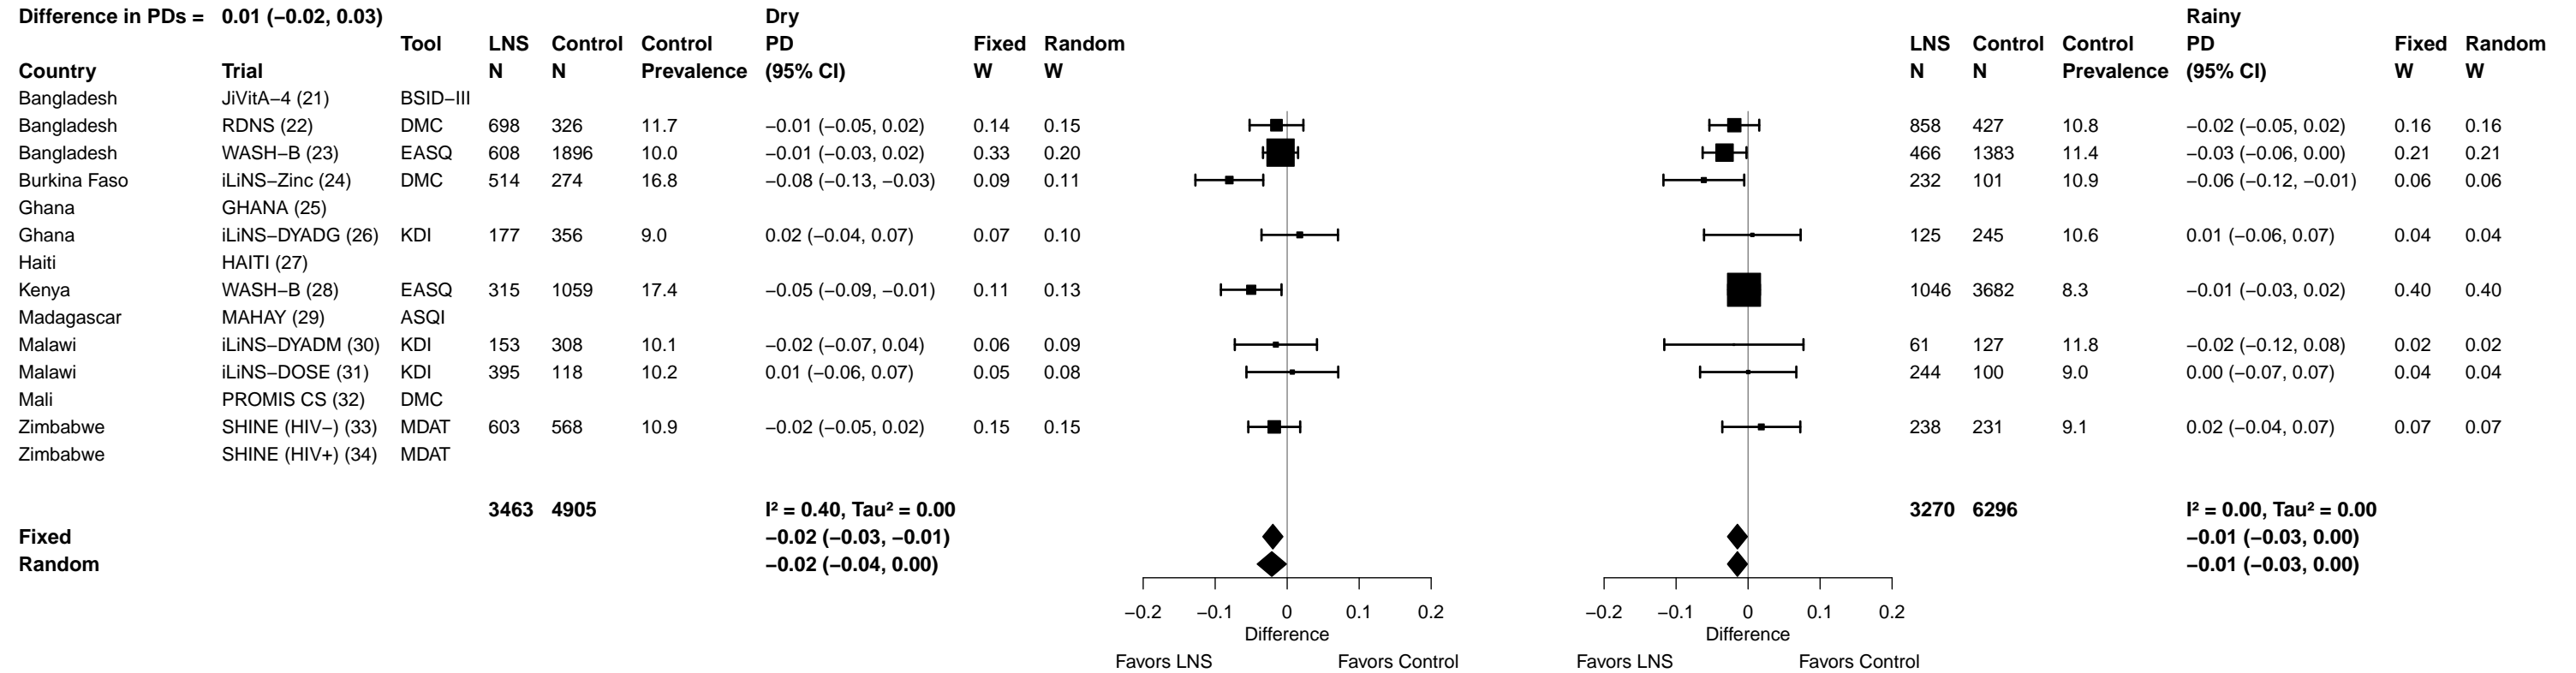

### Supplemental figure 6J: Mean difference in gross motor z-score

#### 6J1: Stratified by Household socio-economic status

**P-for-interaction = 0.091**  
**Difference in MDs = 0.05 (-0.01, 0.10)**

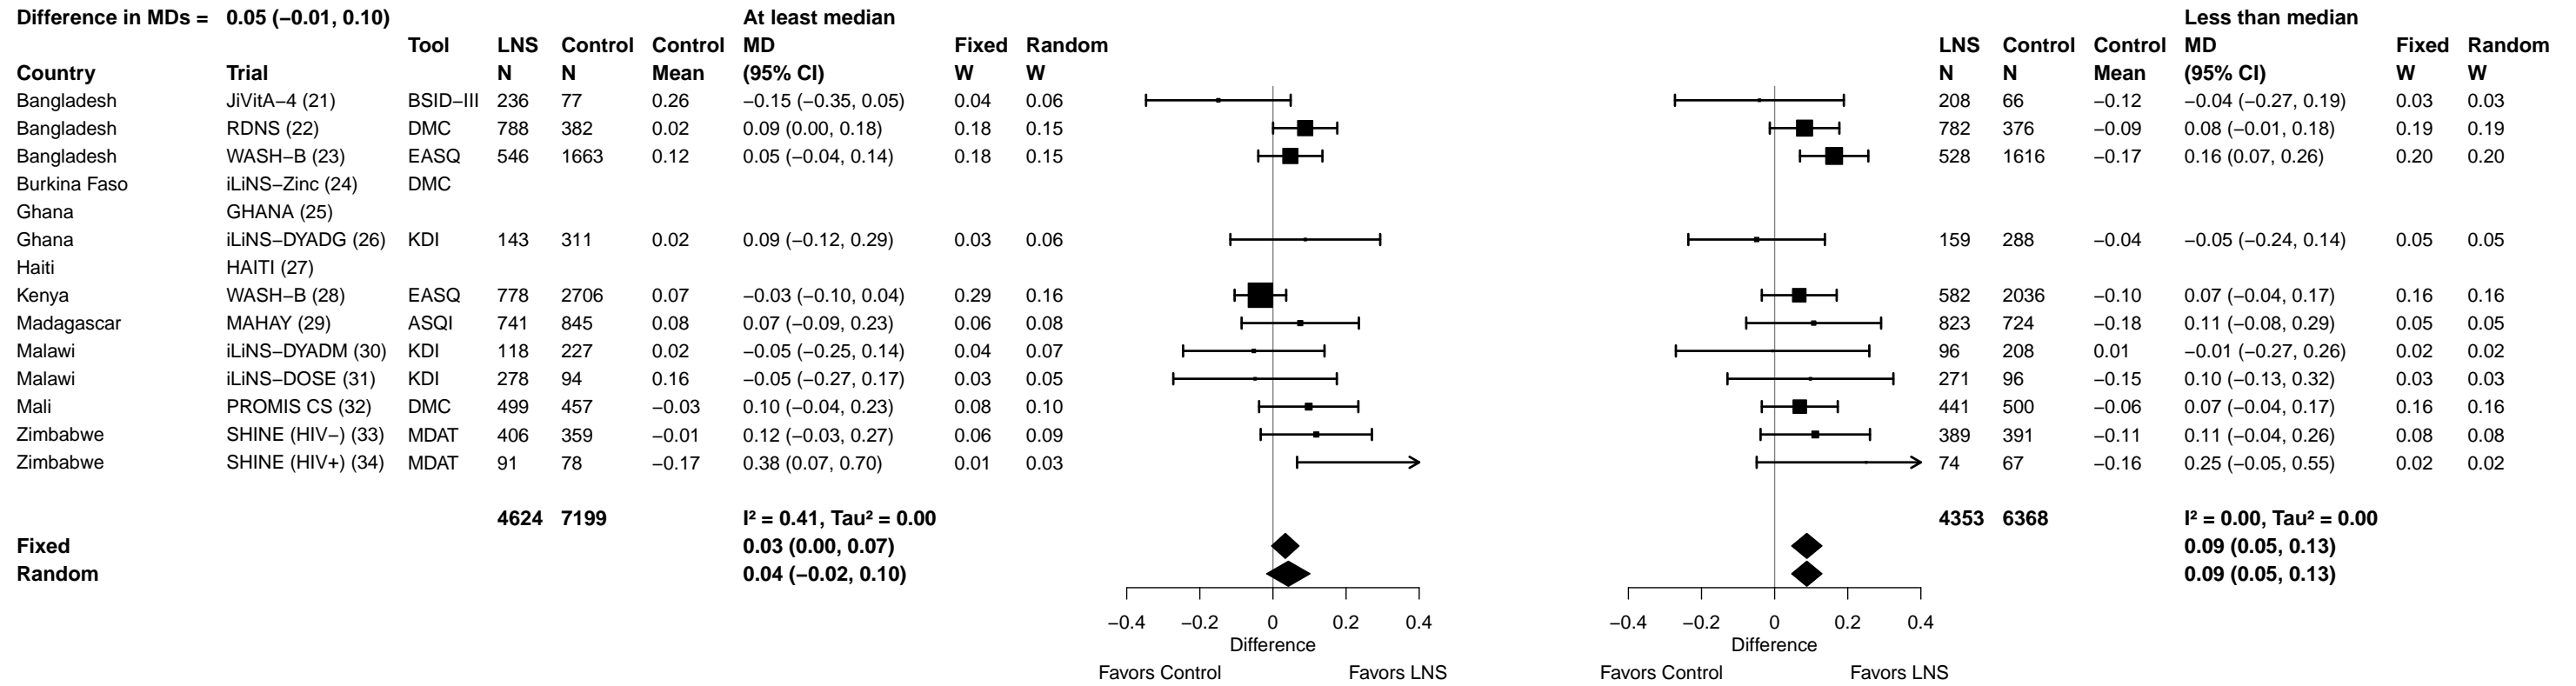

Supplemental figure 6J: Mean difference in gross motor z-score

6J2: Stratified by Household food insecurity

P-for-interaction = 0.951  
 Difference in MDs = 0.00 (-0.07, 0.08)

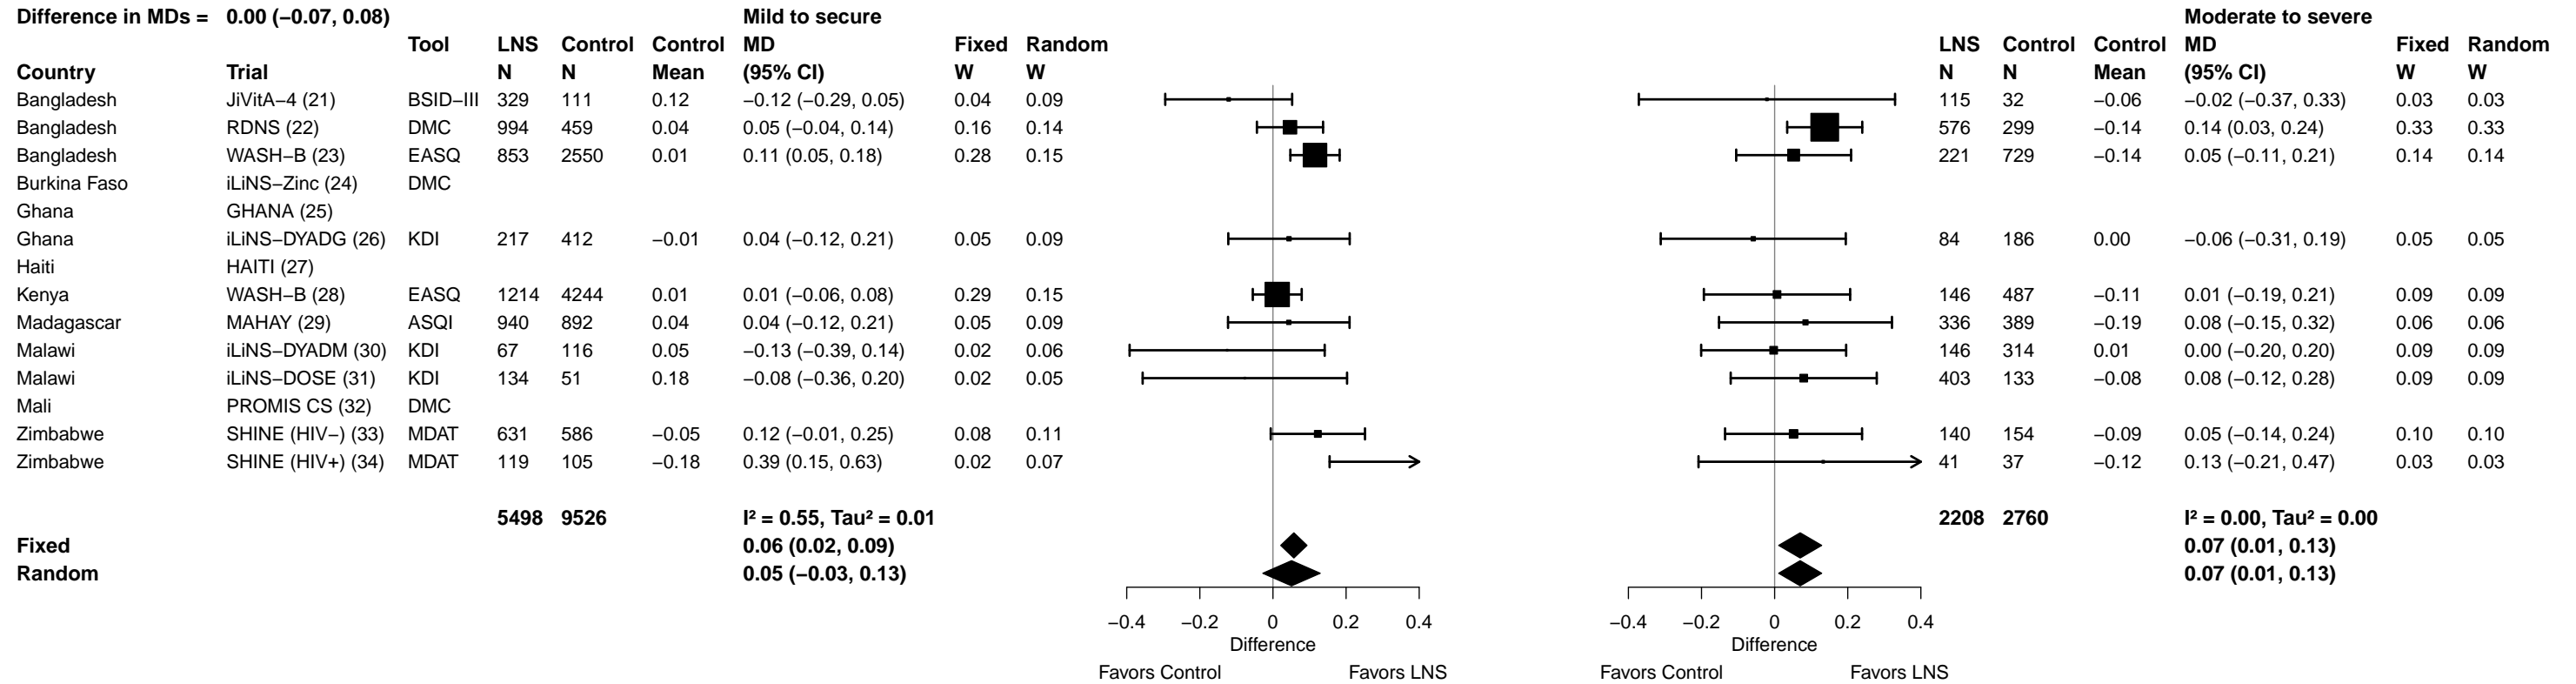

Supplemental figure 6J: Mean difference in gross motor z-score

6J3: Stratified by Household source water quality

P-for-interaction = 0.883

Difference in MDs = -0.01 (-0.12, 0.10)

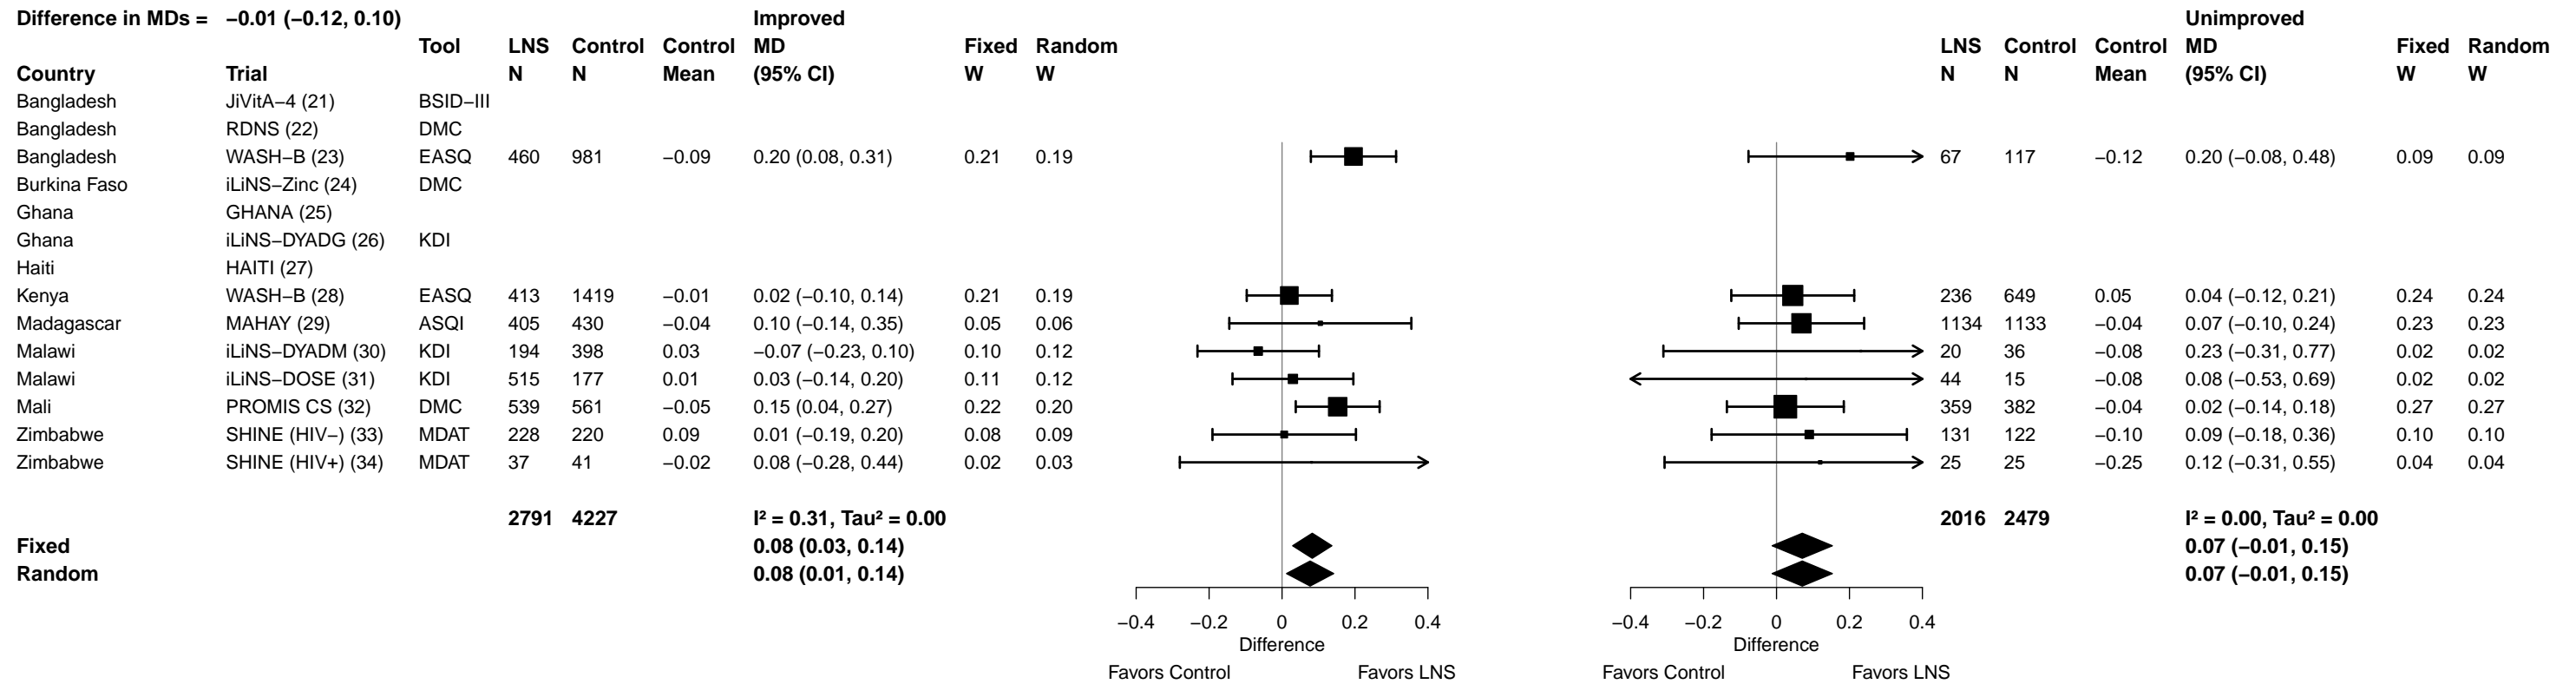

Supplemental figure 6J: Mean difference in gross motor z-score

6J4: Stratified by Household sanitation

**P-for-interaction = 0.943**  
**Difference in MDs = 0.00 (-0.10, 0.09)**

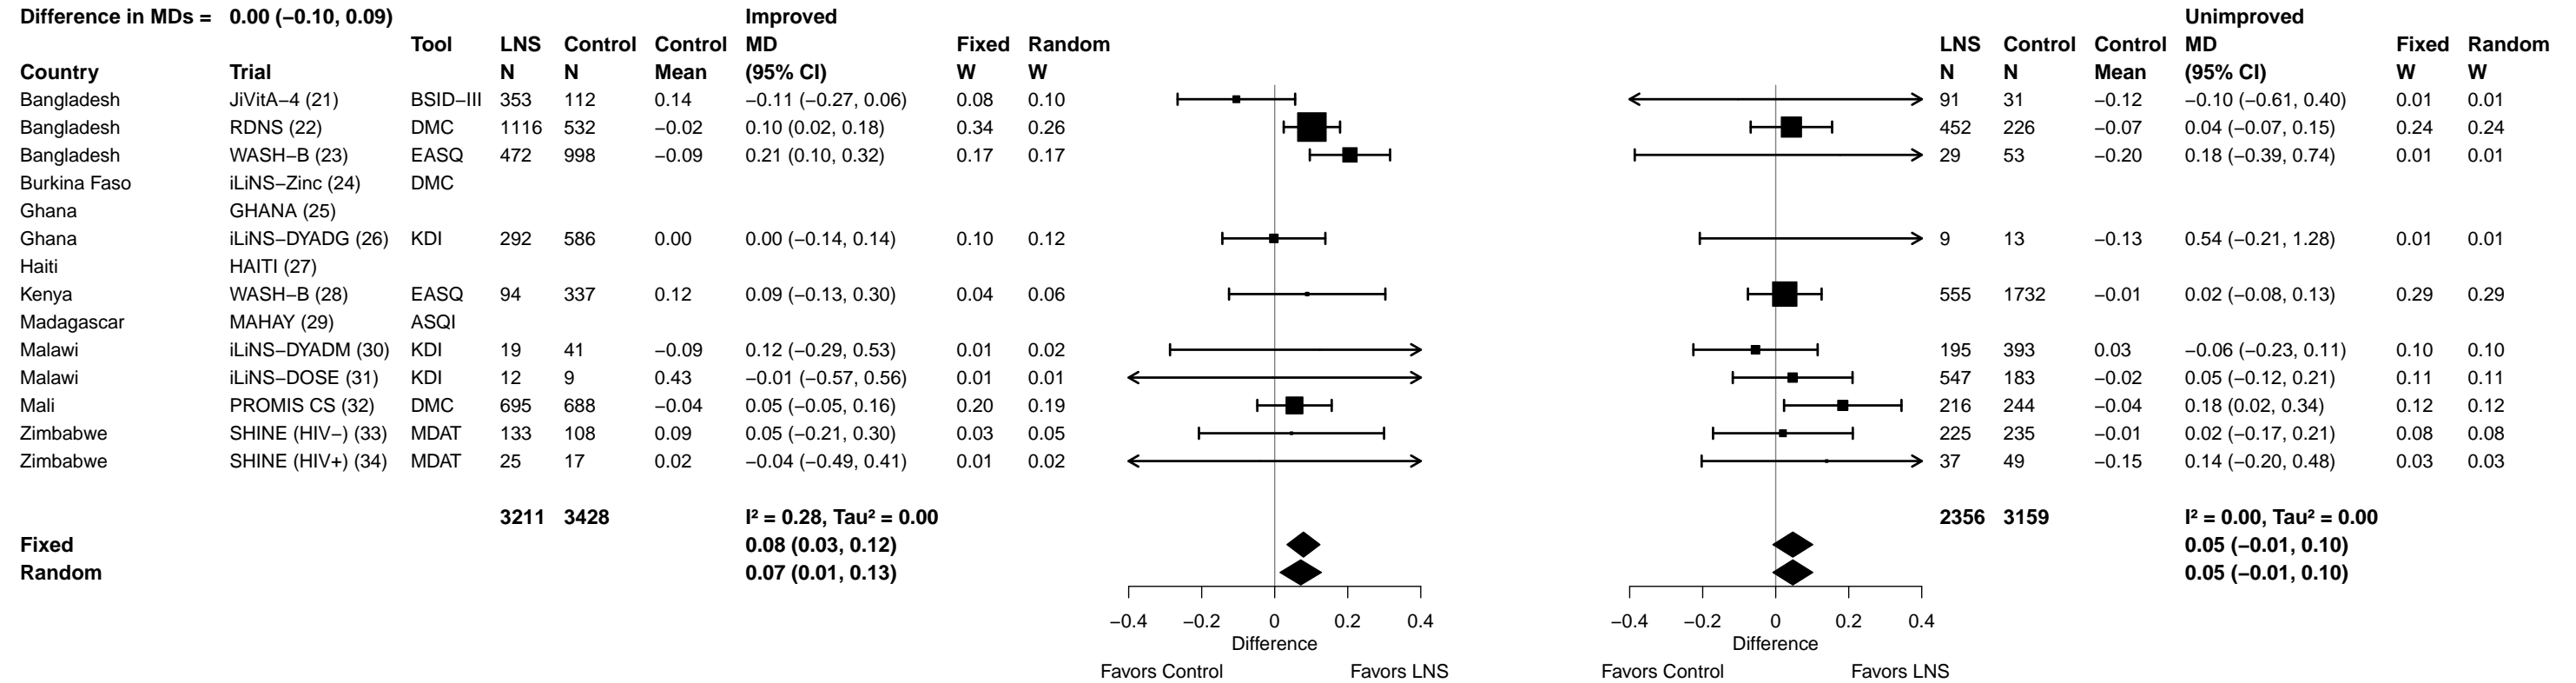

Supplemental figure 6J: Mean difference in gross motor z-score

6J5: Stratified by Home environment

P-for-interaction = 0.300  
 Difference in MDs = -0.04 (-0.10, 0.03)

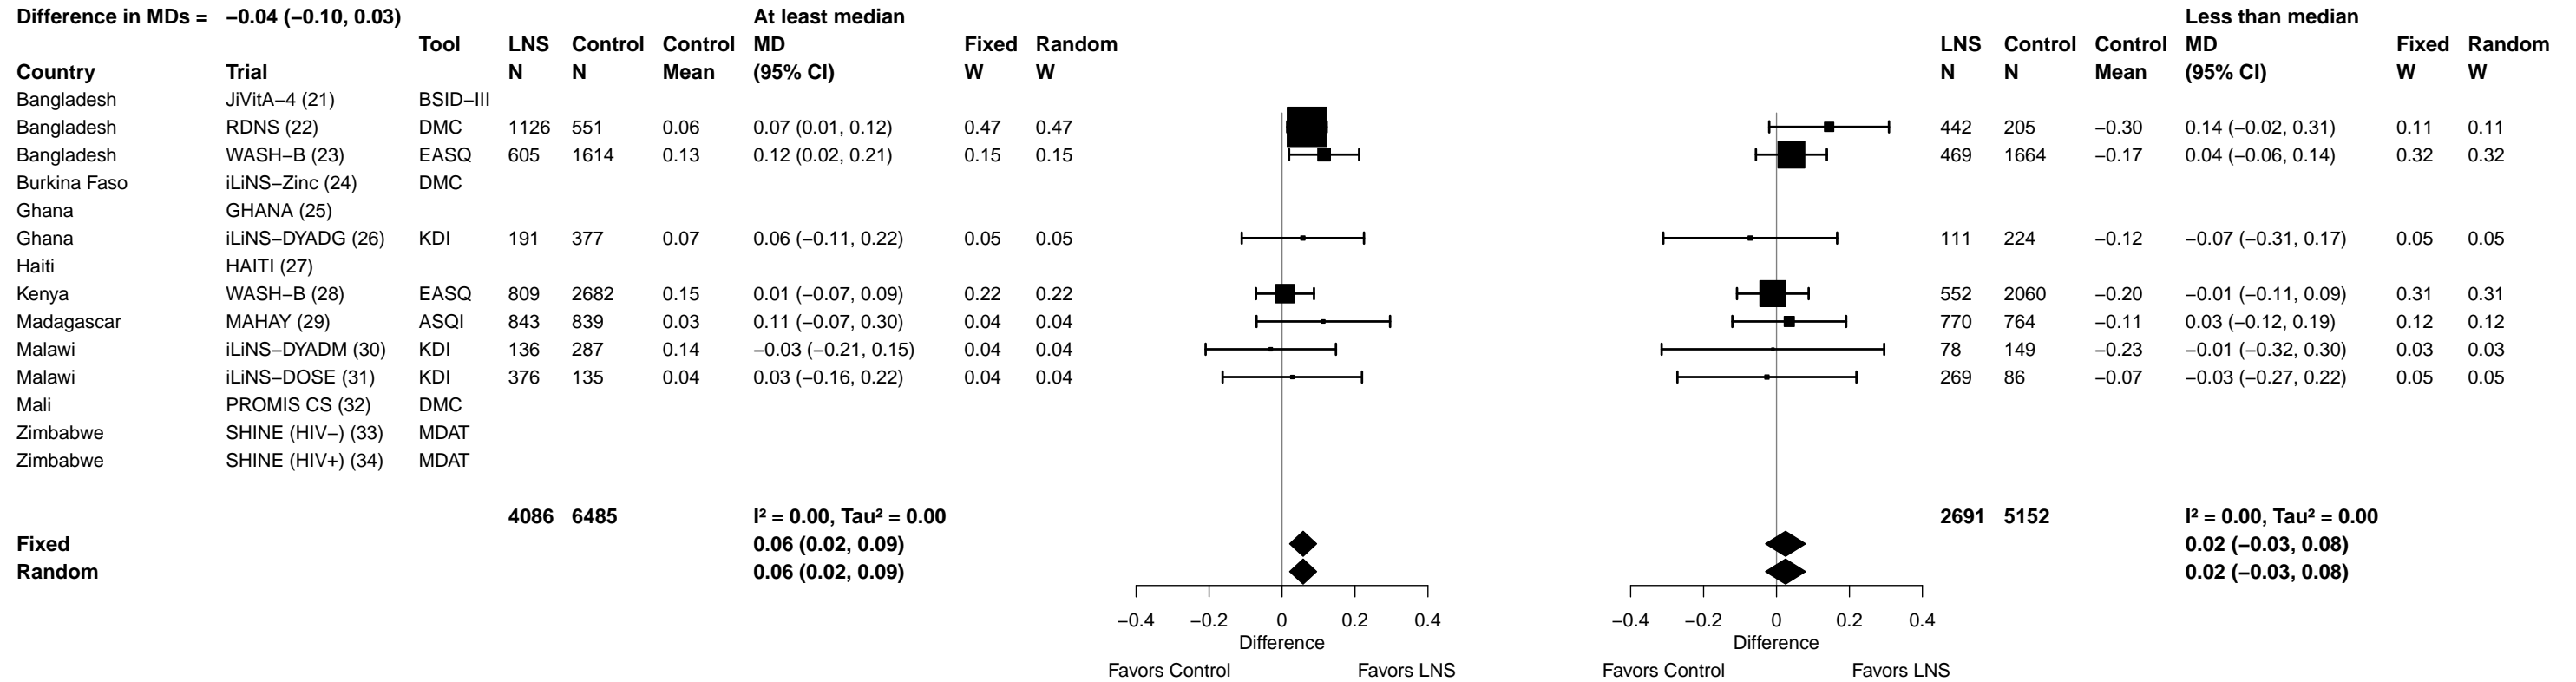

Supplemental figure 6J: Mean difference in gross motor z-score

6J6: Stratified by Season at the time of assessment

**P-for-interaction = 0.958**  
**Difference in MDs = 0.00 (-0.07, 0.06)**

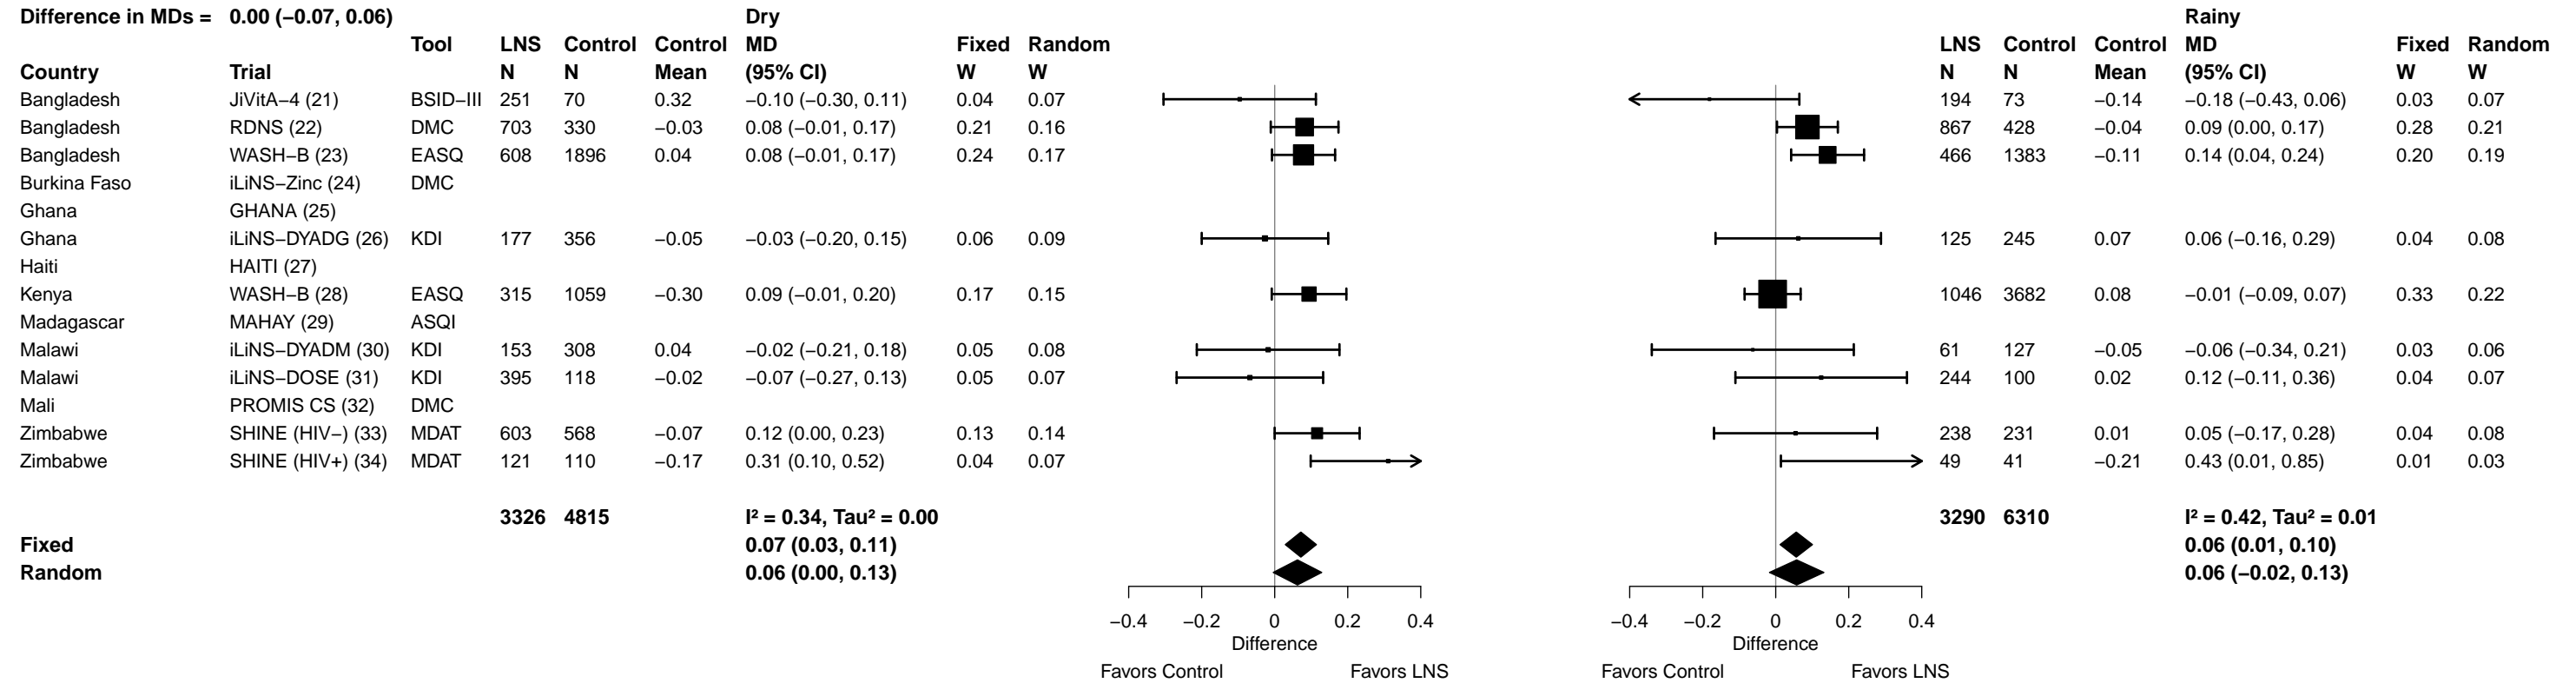



### Supplemental figure 6K: Mean difference in fine motor z-score

#### 6K1: Stratified by Household socio-economic status

**P-for-interaction = 0.967**  
**Difference in MDs = 0.00 (-0.08, 0.08)**

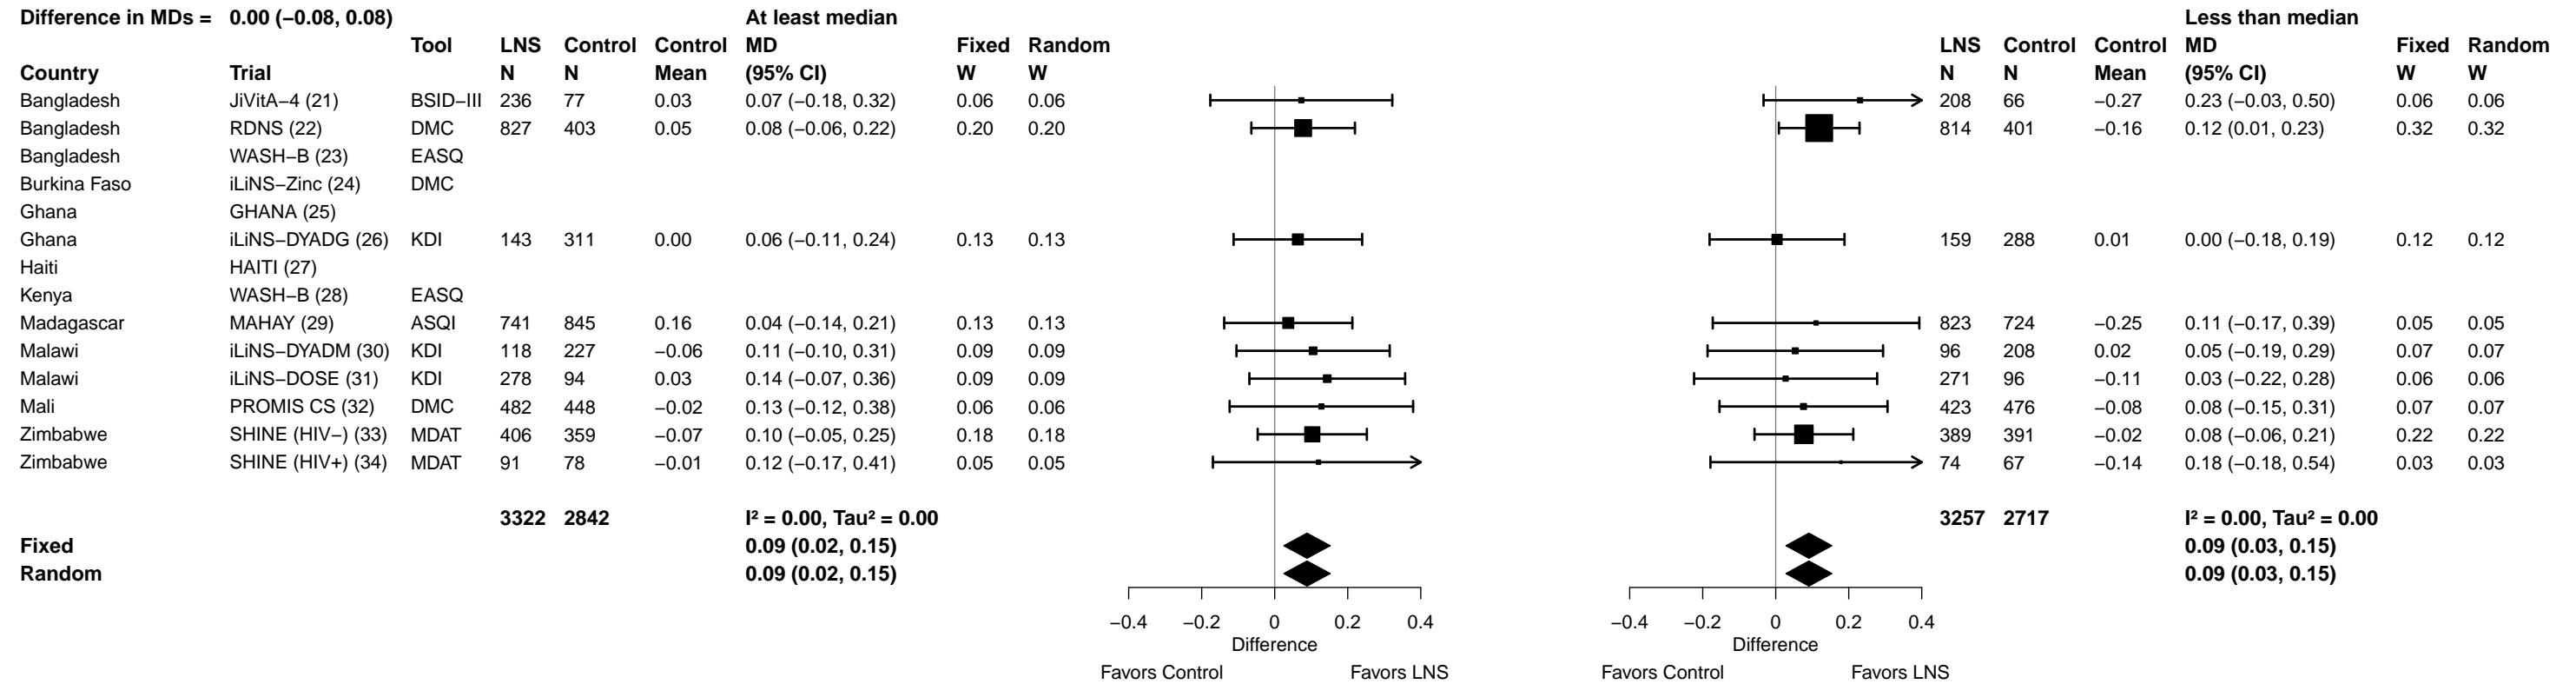

Supplemental figure 6K: Mean difference in fine motor z-score

6K2: Stratified by Household food insecurity

P-for-interaction = 0.352  
 Difference in MDs = 0.05 (-0.05, 0.15)

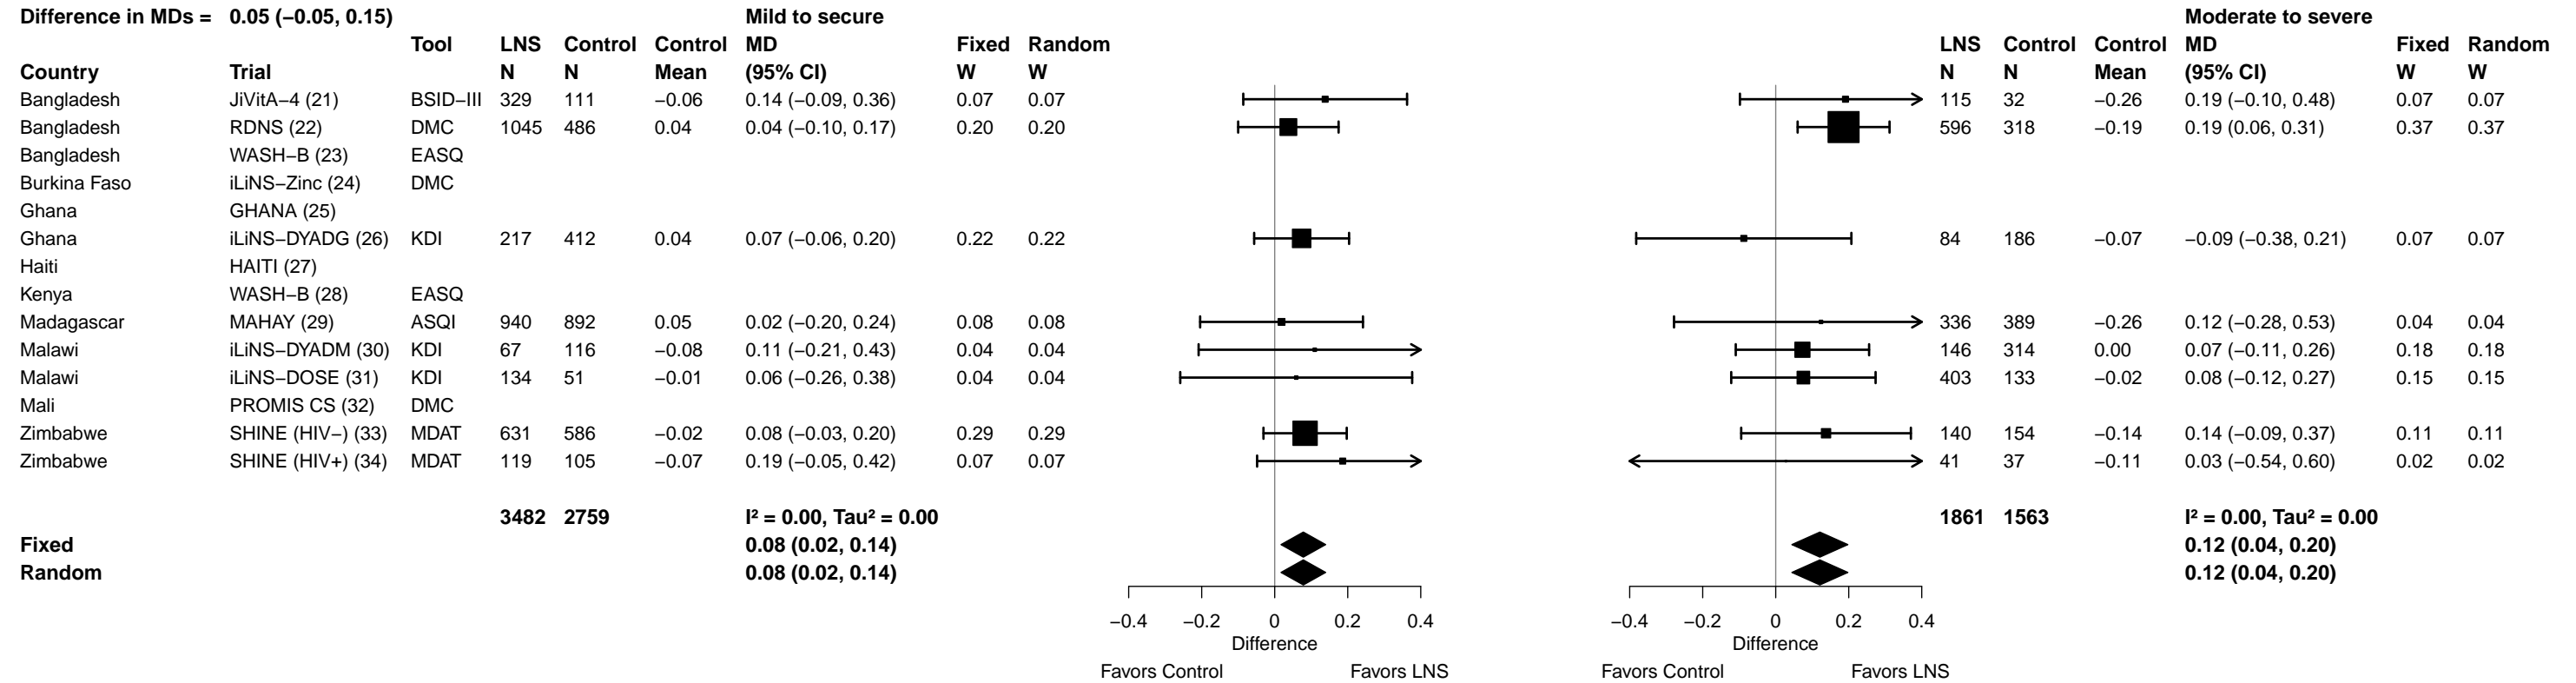

Supplemental figure 6K: Mean difference in fine motor z-score

6K3: Stratified by Household source water quality

P-for-interaction = 0.410  
 Difference in MDs = 0.07 (-0.10, 0.25)

| Country      | Trial             | Tool     | LNS<br>N | Control<br>N | Control<br>Mean | Improved<br>MD<br>(95% CI) | Fixed<br>W | Random<br>W |  | LNS<br>N | Control<br>N | Control<br>Mean | Unimproved<br>MD<br>(95% CI) | Fixed<br>W | Random<br>W |
|--------------|-------------------|----------|----------|--------------|-----------------|----------------------------|------------|-------------|--|----------|--------------|-----------------|------------------------------|------------|-------------|
|              |                   |          |          |              |                 |                            |            |             |  |          |              |                 |                              |            |             |
| Bangladesh   | JiVitA-4 (21)     | BSID-III |          |              |                 |                            |            |             |  |          |              |                 |                              |            |             |
| Bangladesh   | RDNS (22)         | DMC      |          |              |                 |                            |            |             |  |          |              |                 |                              |            |             |
| Bangladesh   | WASH-B (23)       | EASQ     |          |              |                 |                            |            |             |  |          |              |                 |                              |            |             |
| Burkina Faso | iLiNS-Zinc (24)   | DMC      |          |              |                 |                            |            |             |  |          |              |                 |                              |            |             |
| Ghana        | GHANA (25)        |          |          |              |                 |                            |            |             |  |          |              |                 |                              |            |             |
| Ghana        | iLiNS-DYADG (26)  | KDI      |          |              |                 |                            |            |             |  |          |              |                 |                              |            |             |
| Haiti        | HAITI (27)        |          |          |              |                 |                            |            |             |  |          |              |                 |                              |            |             |
| Kenya        | WASH-B (28)       | EASQ     |          |              |                 |                            |            |             |  |          |              |                 |                              |            |             |
| Madagascar   | MAHAY (29)        | ASQI     | 405      | 430          | -0.14           | 0.02 (-0.37, 0.41)         | 0.05       | 0.05        |  | 1134     | 1133         | 0.02            | 0.07 (-0.16, 0.29)           | 0.34       | 0.34        |
| Malawi       | iLiNS-DYADM (30)  | KDI      | 194      | 398          | 0.00            | 0.05 (-0.11, 0.22)         | 0.30       | 0.30        |  | 20       | 36           | -0.22           | 0.34 (-0.23, 0.91)           | 0.05       | 0.05        |
| Malawi       | iLiNS-DOSE (31)   | KDI      | 515      | 177          | -0.01           | 0.08 (-0.09, 0.25)         | 0.28       | 0.28        |  | 44       | 15           | -0.38           | 0.29 (-0.30, 0.89)           | 0.05       | 0.05        |
| Mali         | PROMIS CS (32)    | DMC      | 516      | 540          | -0.02           | 0.09 (-0.19, 0.37)         | 0.10       | 0.10        |  | 348      | 370          | -0.13           | 0.06 (-0.17, 0.29)           | 0.30       | 0.30        |
| Zimbabwe     | SHINE (HIV-) (33) | MDAT     | 228      | 220          | 0.10            | -0.09 (-0.28, 0.11)        | 0.22       | 0.22        |  | 131      | 122          | -0.09           | 0.09 (-0.19, 0.37)           | 0.22       | 0.22        |
| Zimbabwe     | SHINE (HIV+) (34) | MDAT     | 37       | 41           | 0.01            | -0.01 (-0.40, 0.38)        | 0.05       | 0.05        |  | 25       | 25           | -0.16           | -0.21 (-0.85, 0.42)          | 0.04       | 0.04        |

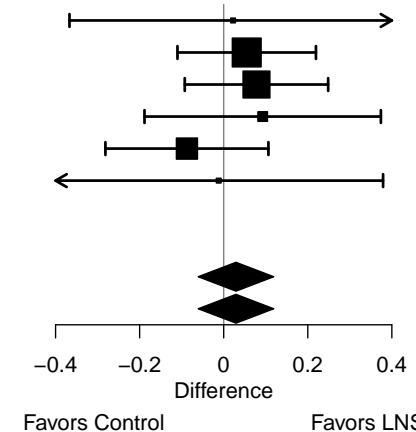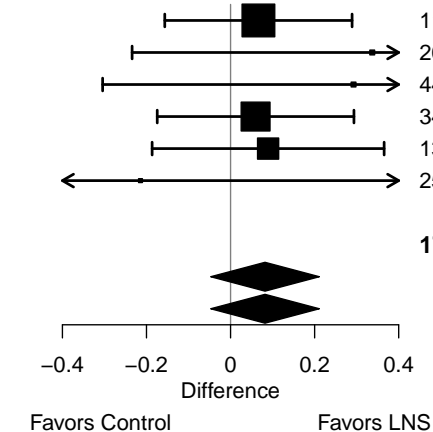

Fixed  
Random  
 I<sup>2</sup> = 0.00, Tau<sup>2</sup> = 0.00  
 0.03 (-0.06, 0.12)  
 0.03 (-0.06, 0.12)

Fixed  
Random  
 I<sup>2</sup> = 0.00, Tau<sup>2</sup> = 0.00  
 0.08 (-0.05, 0.21)  
 0.08 (-0.05, 0.21)

Supplemental figure 6K: Mean difference in fine motor z-score

6K4: Stratified by Household sanitation

P-for-interaction = 0.172

Difference in MDs = -0.09 (-0.23, 0.04)

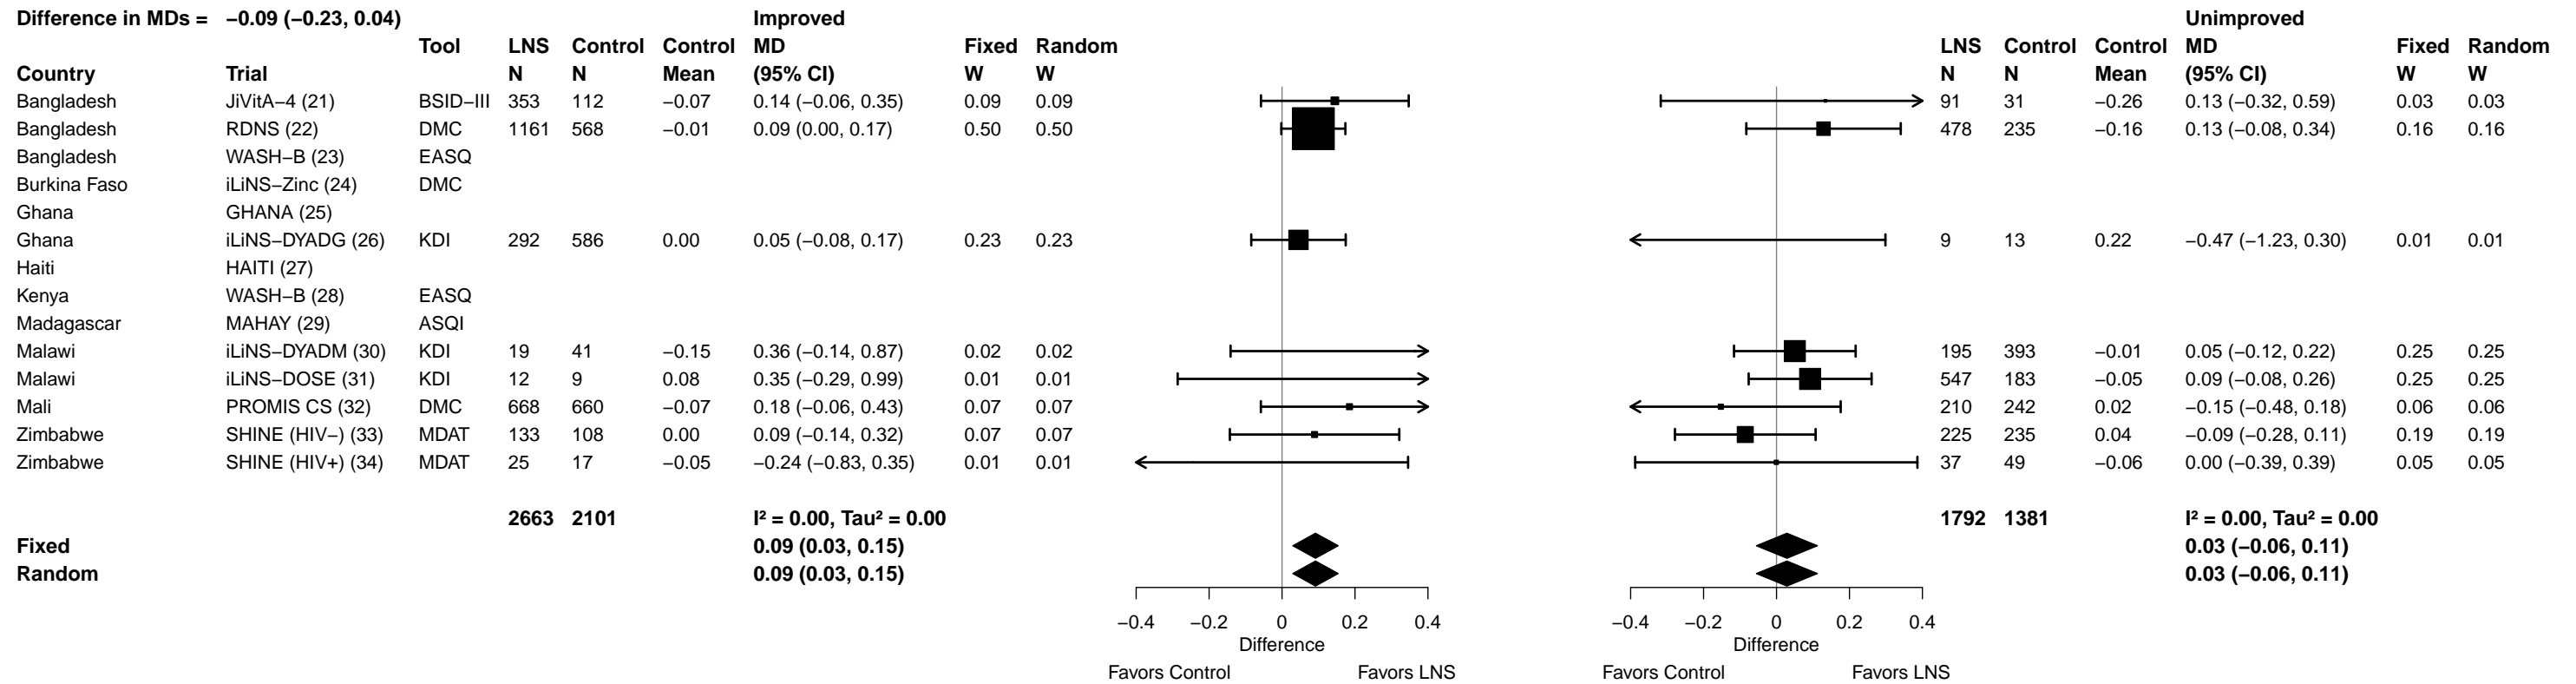

Supplemental figure 6K: Mean difference in fine motor z-score

6K5: Stratified by Home environment

P-for-interaction = 0.860  
 Difference in MDs = 0.01 (-0.11, 0.13)

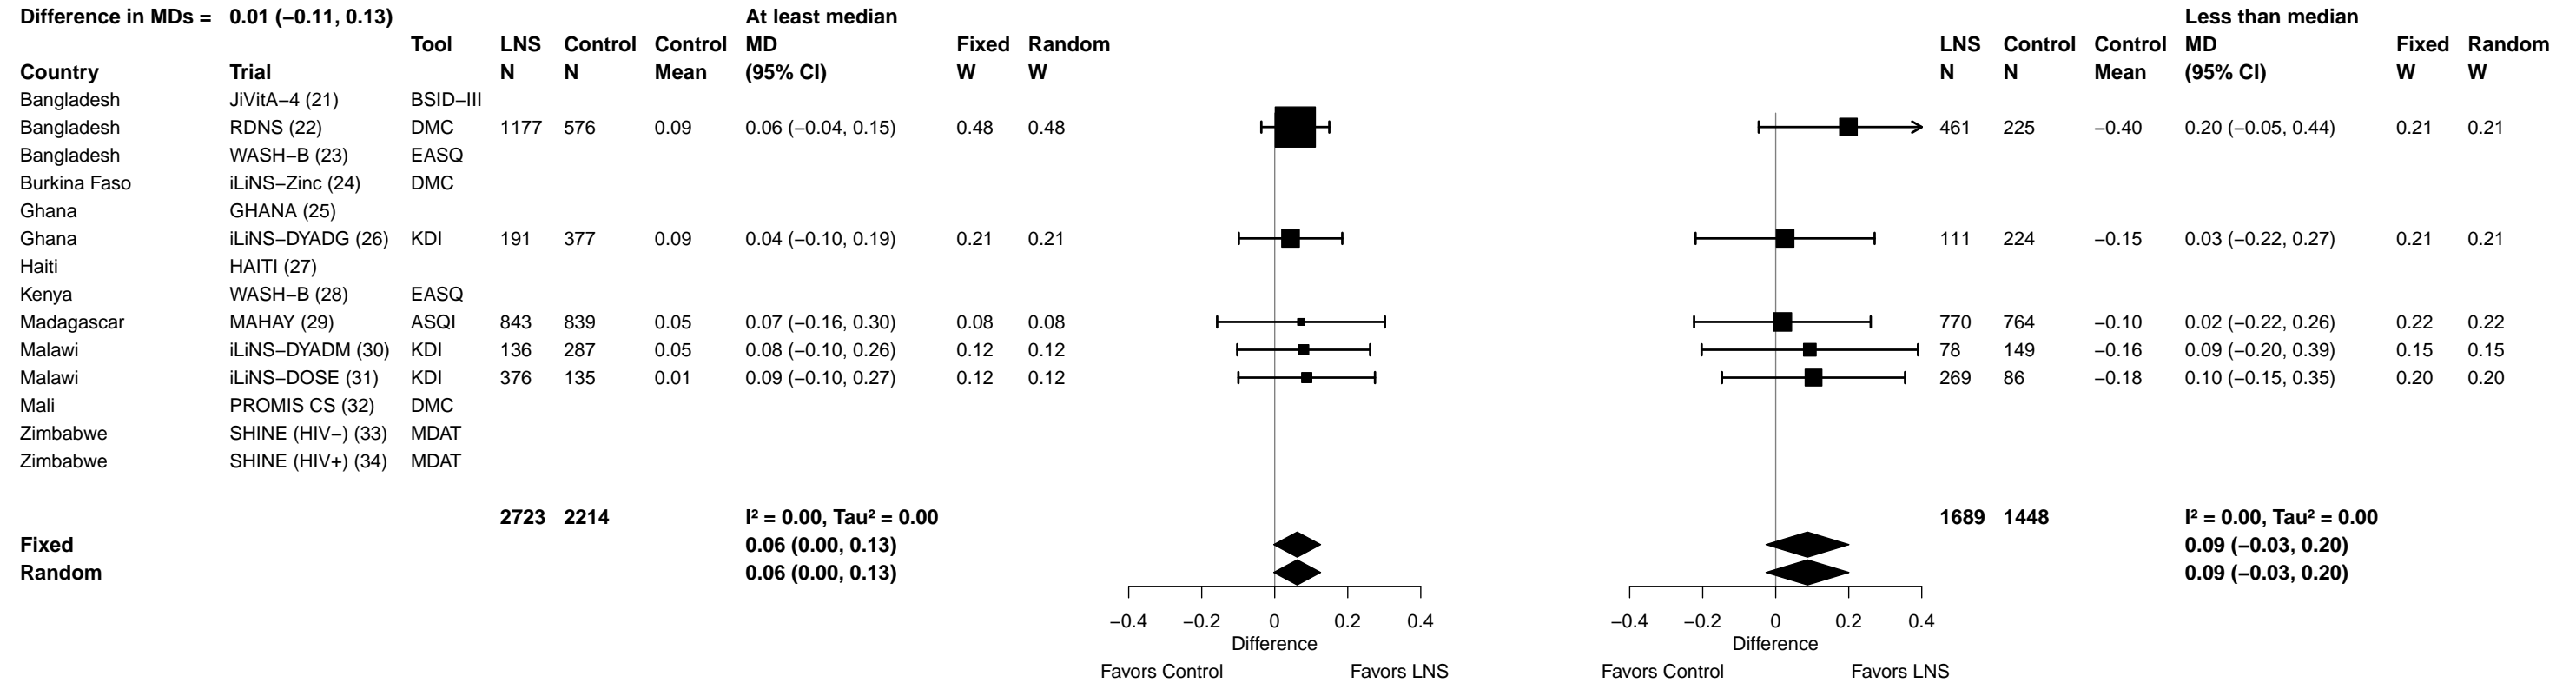

Supplemental figure 6K: Mean difference in fine motor z-score

6K6: Stratified by Season at the time of assessment

P-for-interaction = 0.993  
 Difference in MDs = 0.00 (-0.09, 0.09)

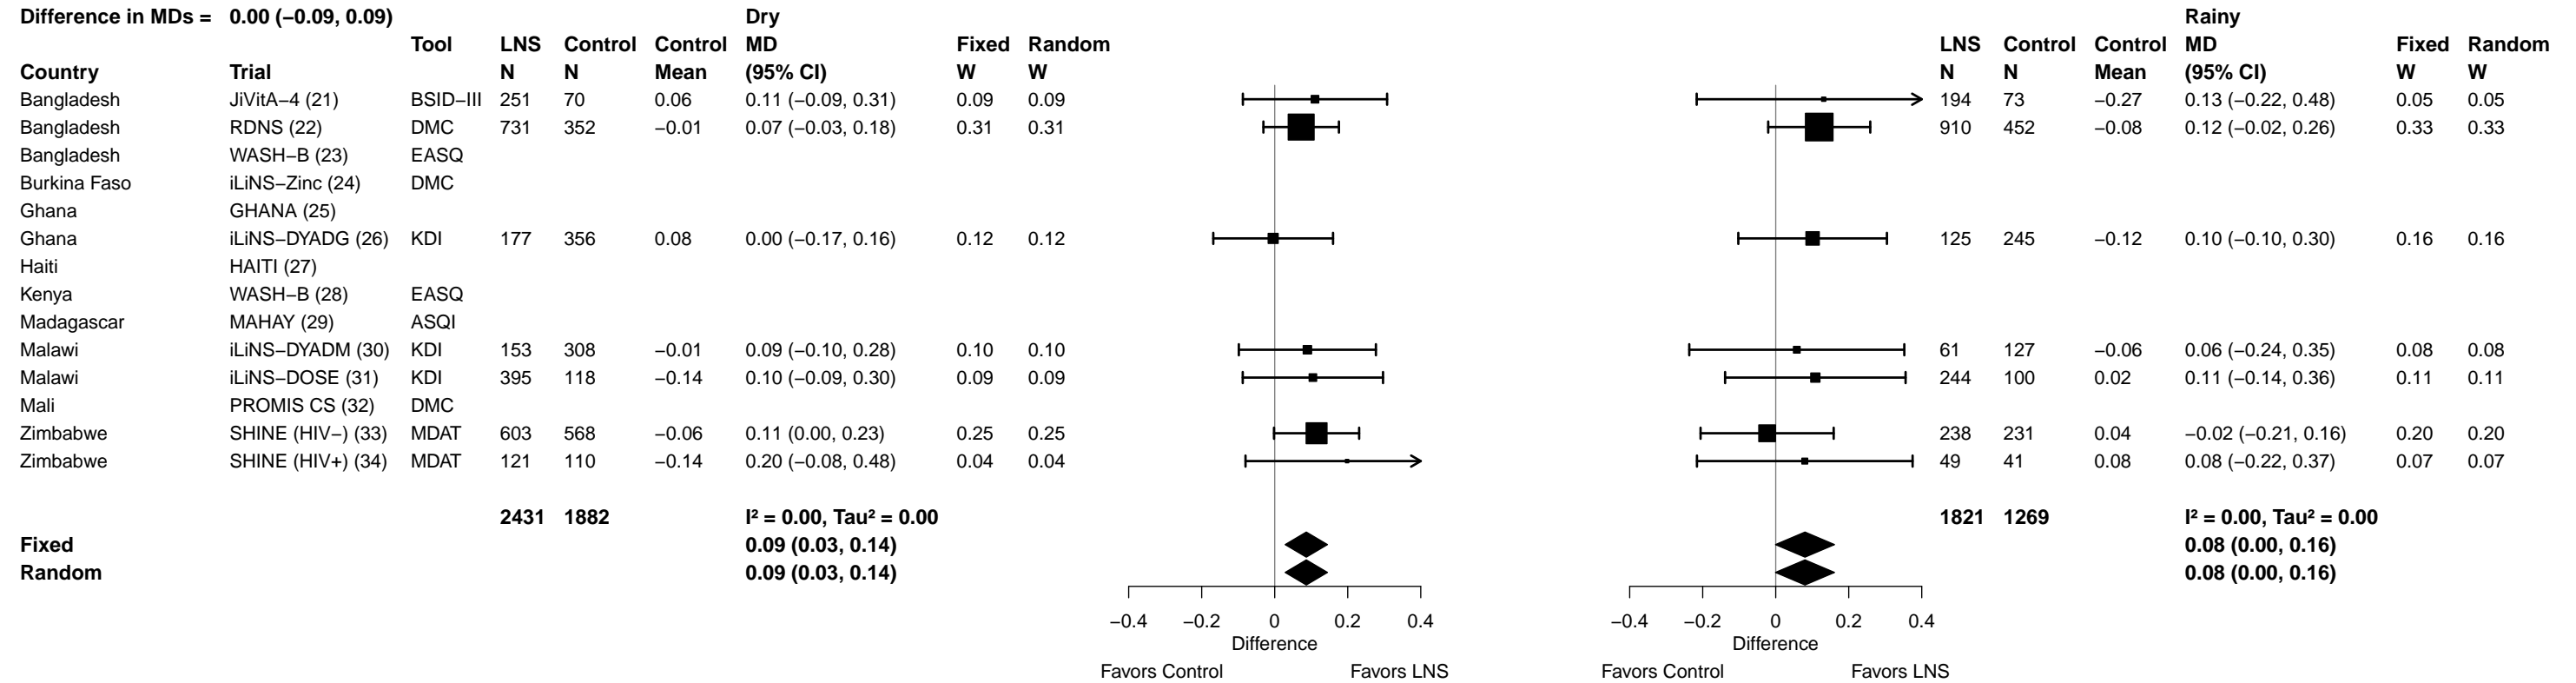

### Supplemental figure 6L: Mean difference in executive function z-score

#### 6L1: Stratified by Household socio-economic status

**P-for-interaction = 0.033**  
**Difference in MDs = 0.09 (0.01, 0.18)**

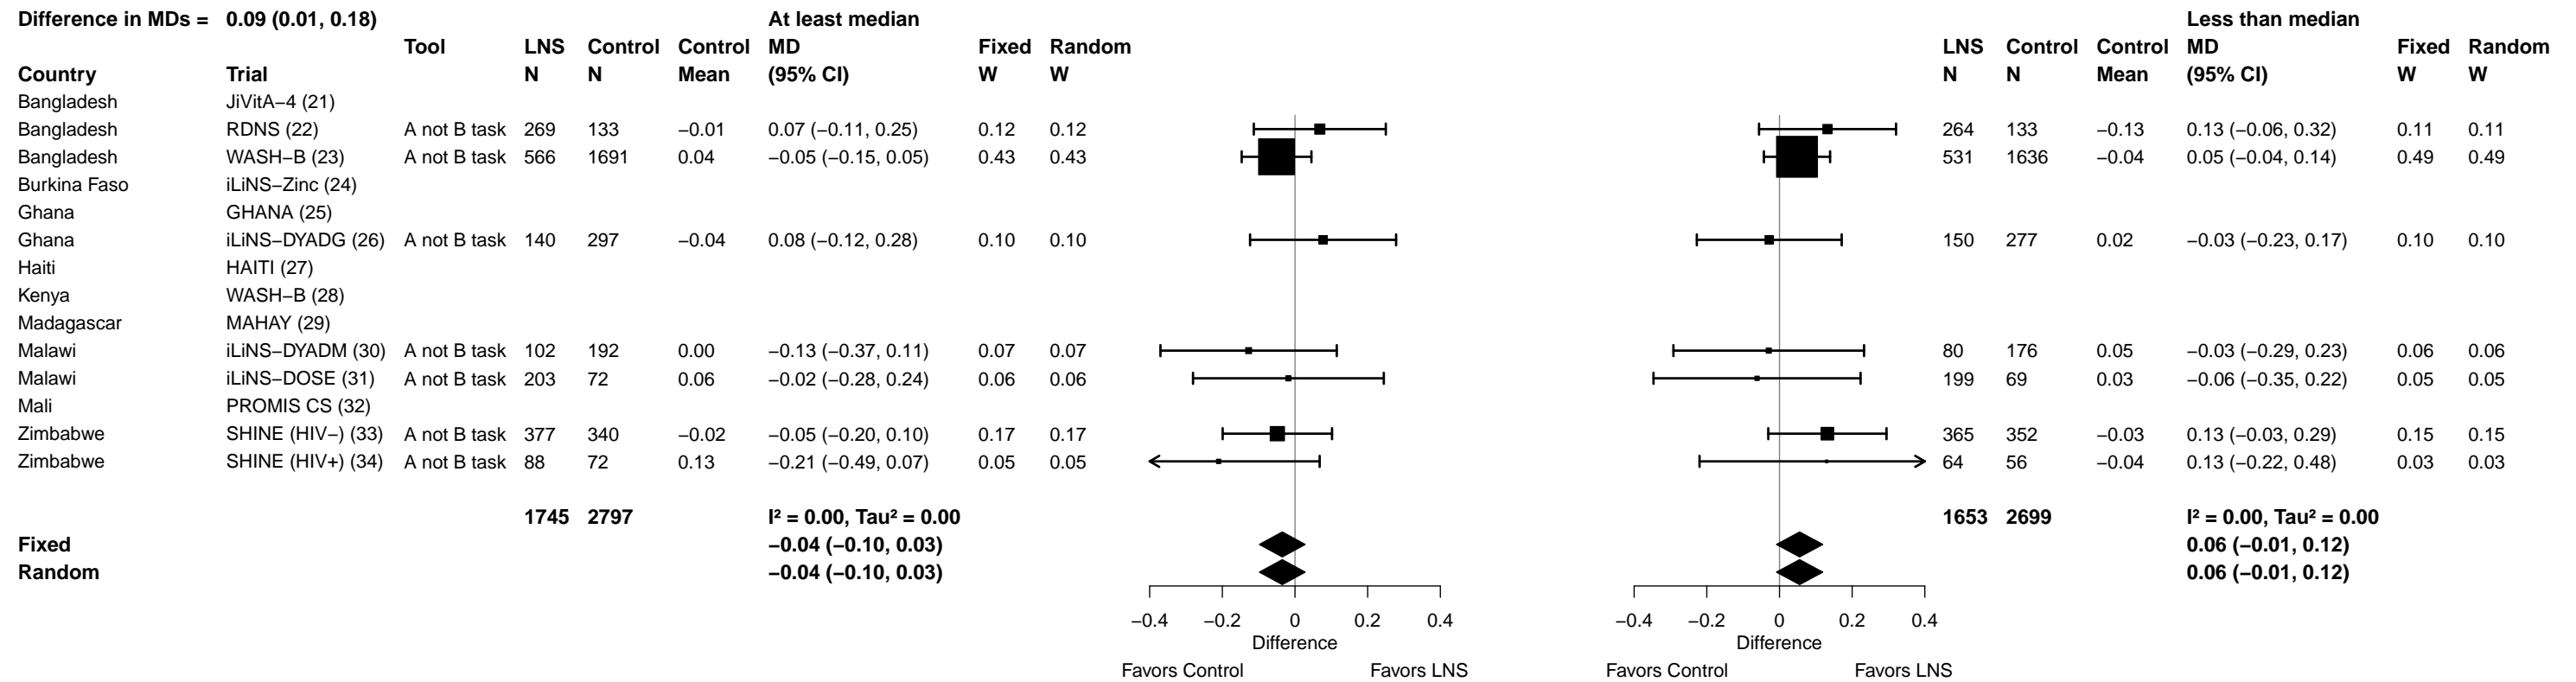

Supplemental figure 6L: Mean difference in executive function z-score

6L2: Stratified by Household food insecurity

**P-for-interaction = 0.984**  
**Difference in MDs = 0.00 (-0.10, 0.10)**

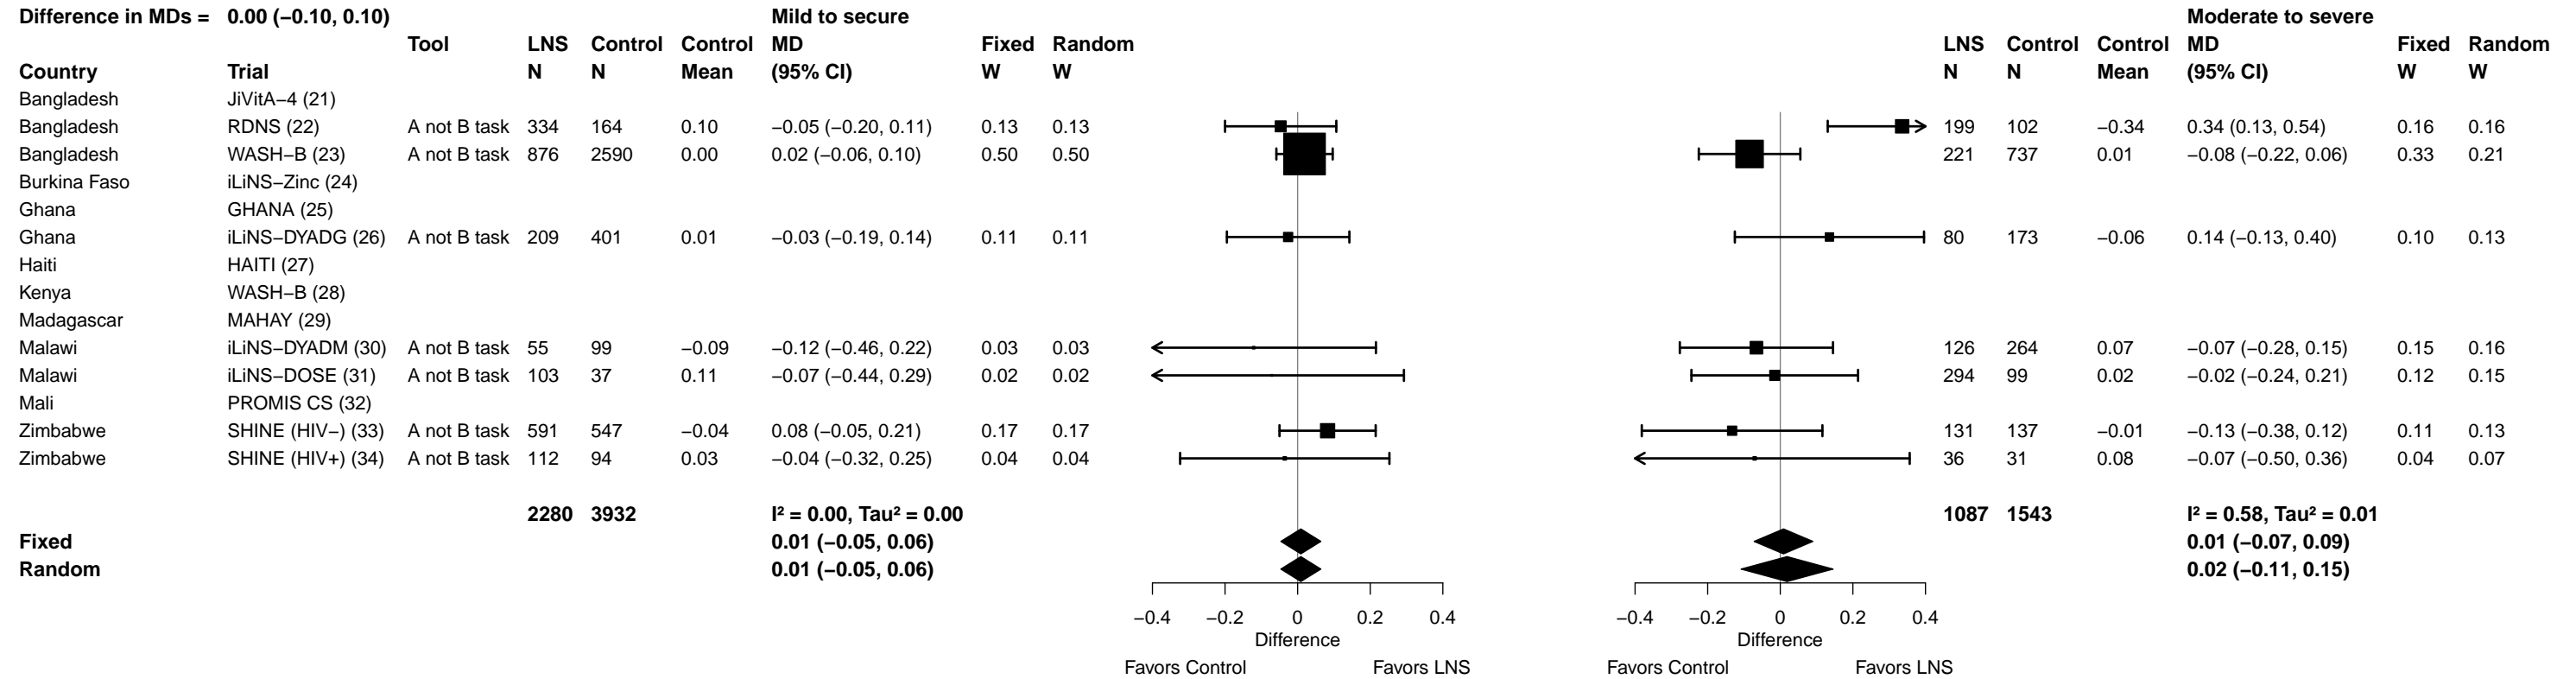



Supplemental figure 6L: Mean difference in executive function z-score

6L3: Stratified by Household source water quality

**P-for-interaction = 0.700**  
**Difference in MDs = 0.04 (-0.16, 0.24)**

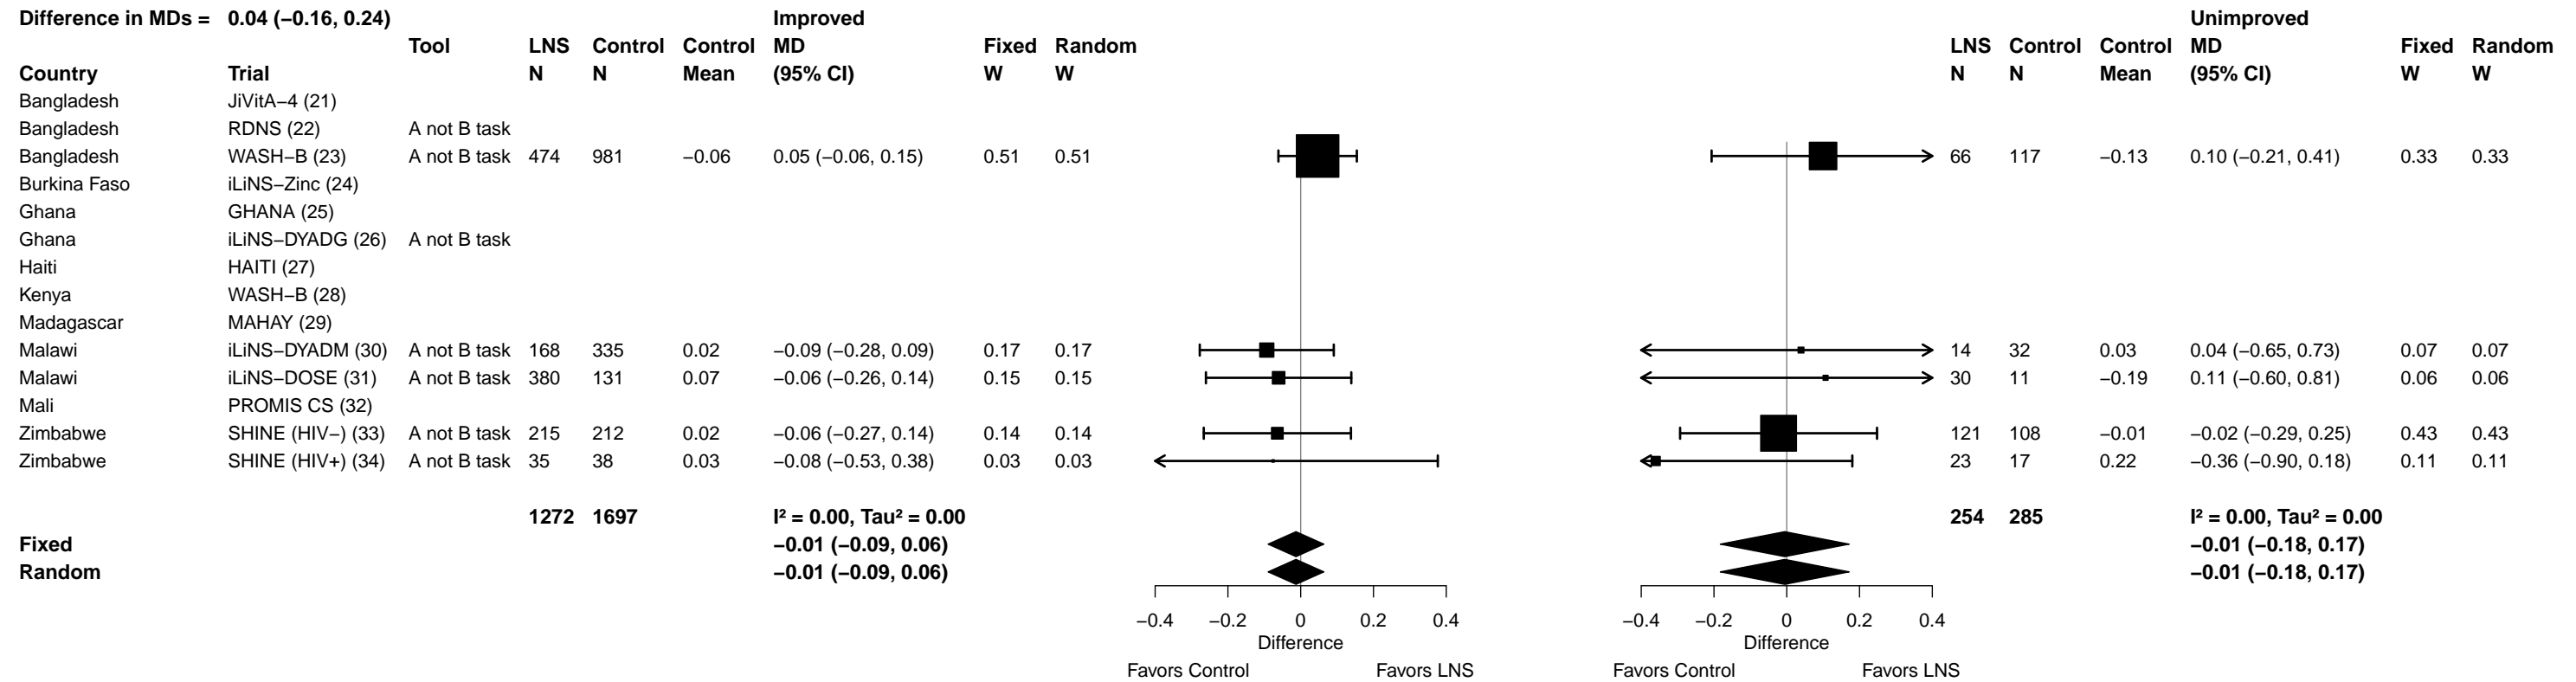

Supplemental figure 6L: Mean difference in executive function z-score

6L4: Stratified by Household sanitation

**P-for-interaction = 0.947**  
**Difference in MDs = 0.01 (-0.18, 0.19)**

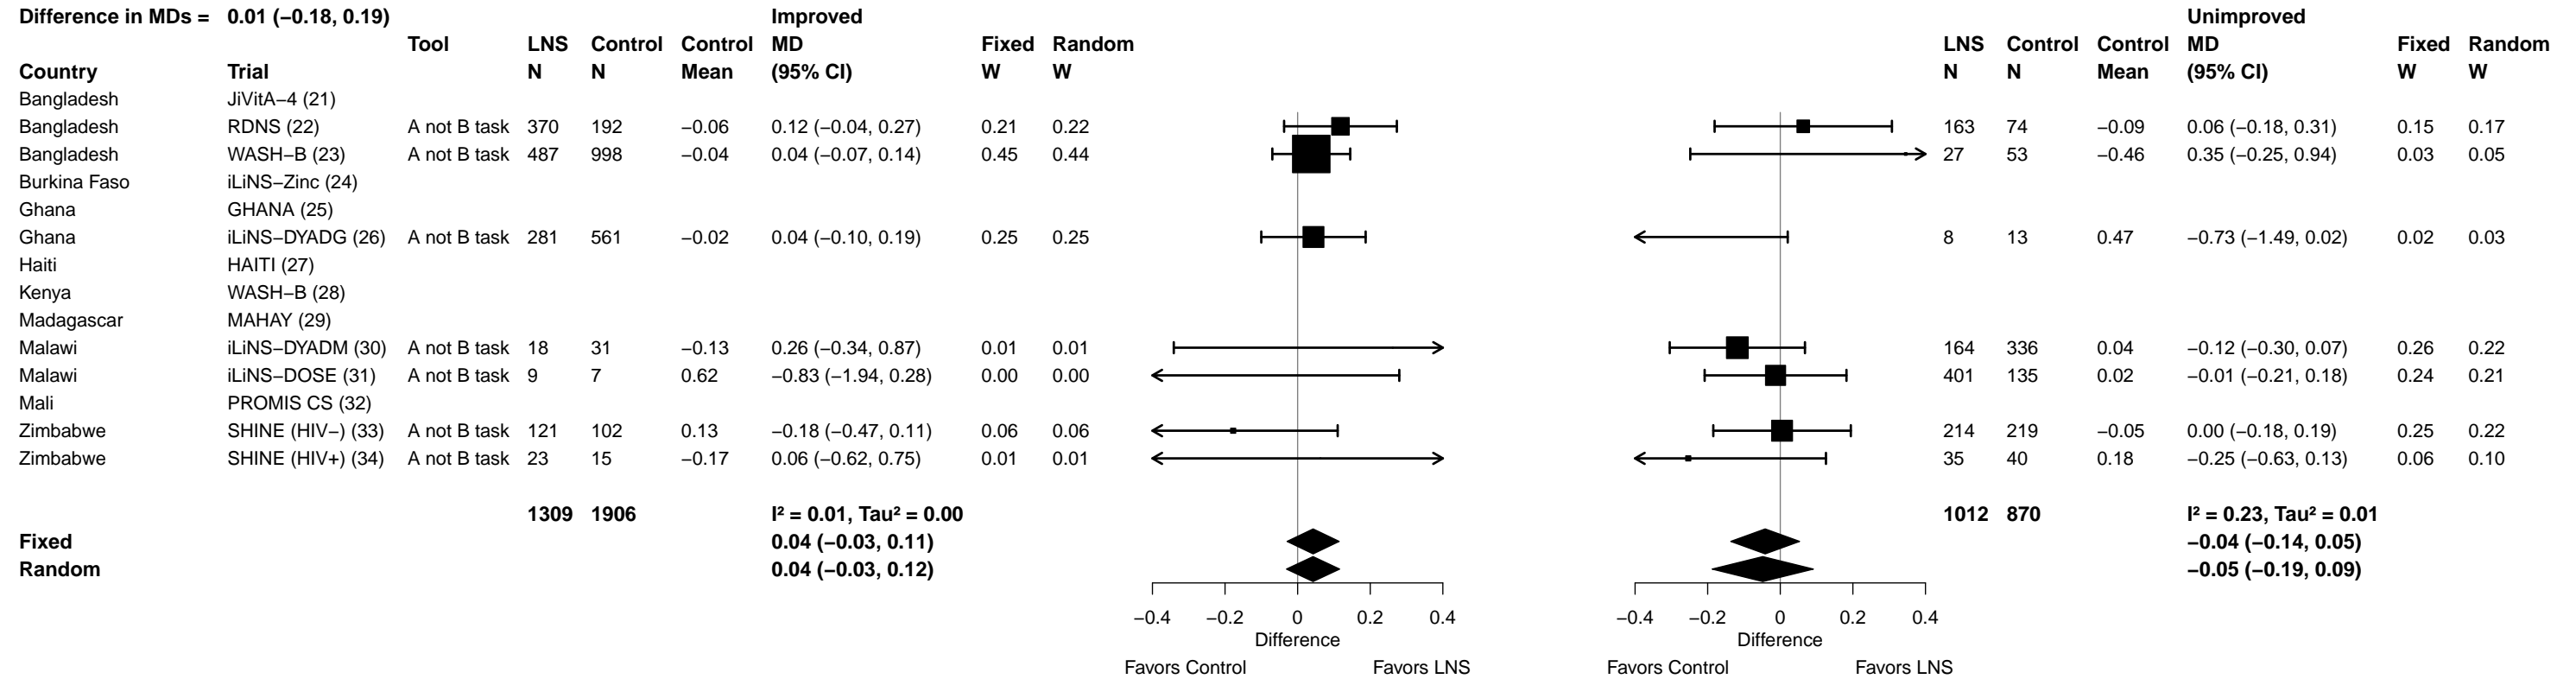

Supplemental figure 6L: Mean difference in executive function z-score

6L5: Stratified by Home environment

P-for-interaction = 0.142  
 Difference in MDs = -0.08 (-0.18, 0.03)

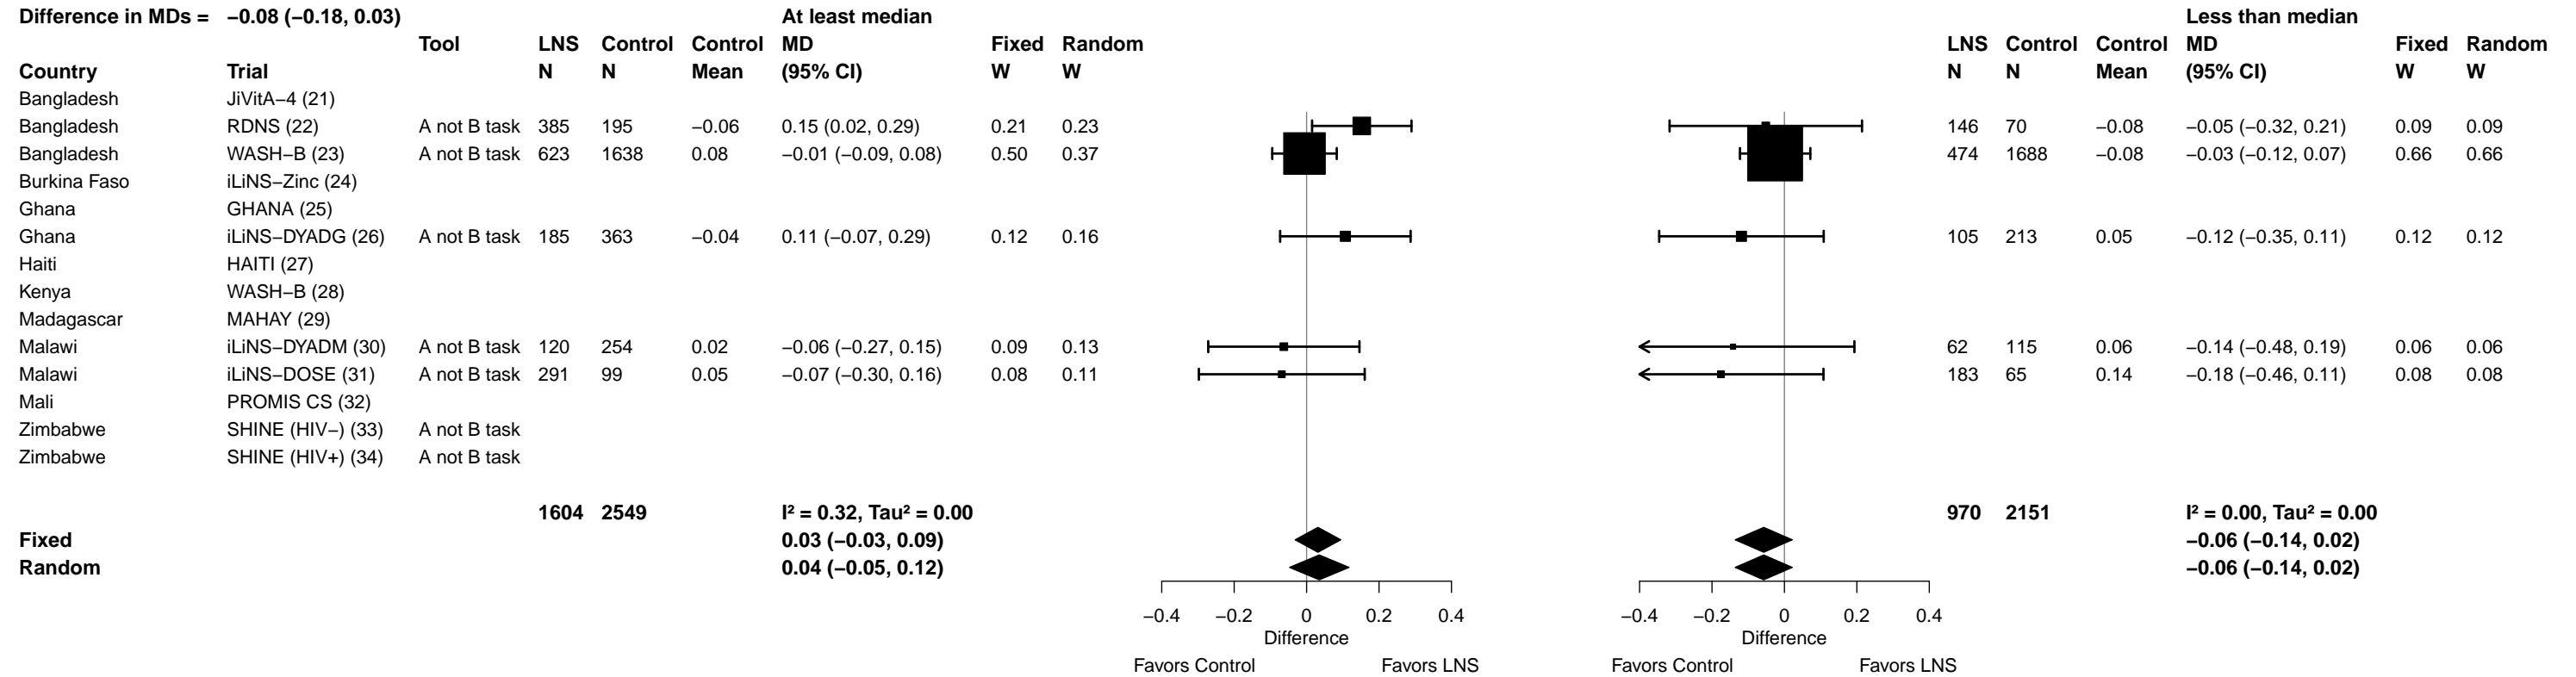

Supplemental figure 6L: Mean difference in executive function z-score

6L6: Stratified by Season at the time of assessment

P-for-interaction = 0.766  
 Difference in MDs = 0.01 (-0.08, 0.11)

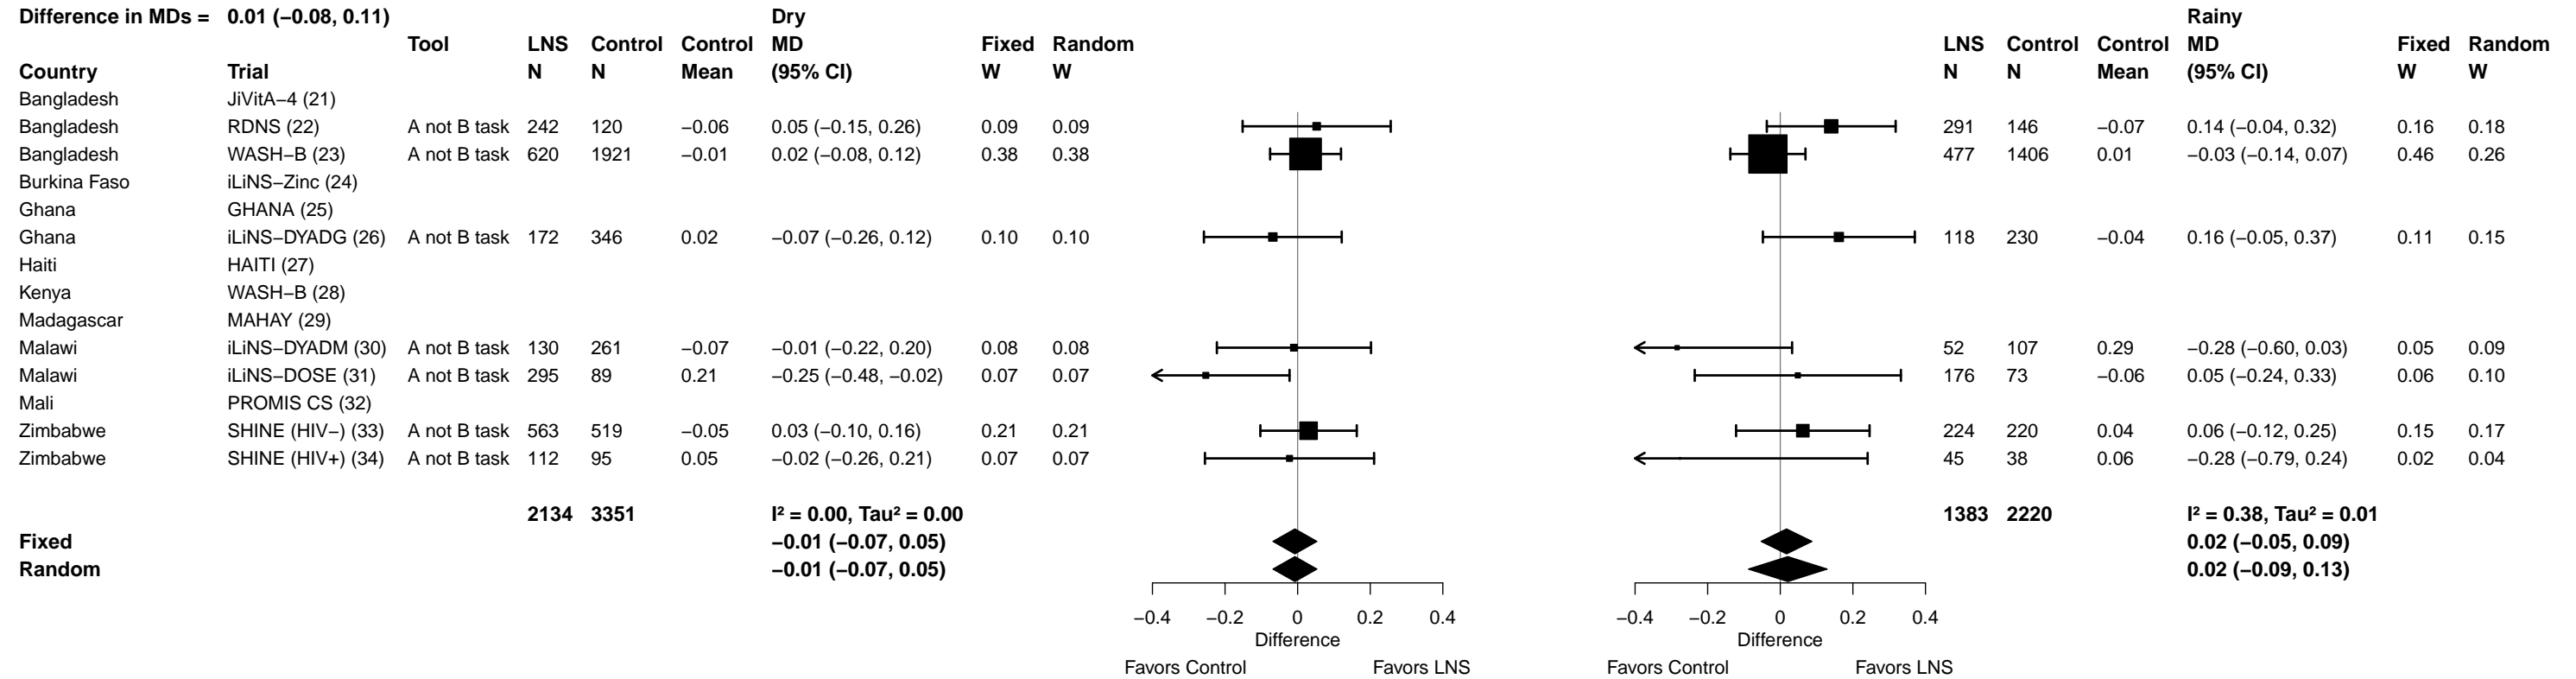

### Supplemental figure 6M: Executive function lowest decile prevalence ratio

#### 6M1: Stratified by Household socio-economic status

P-for-interaction = 0.389

Ratio of PRs = 0.88 (0.66, 1.17)

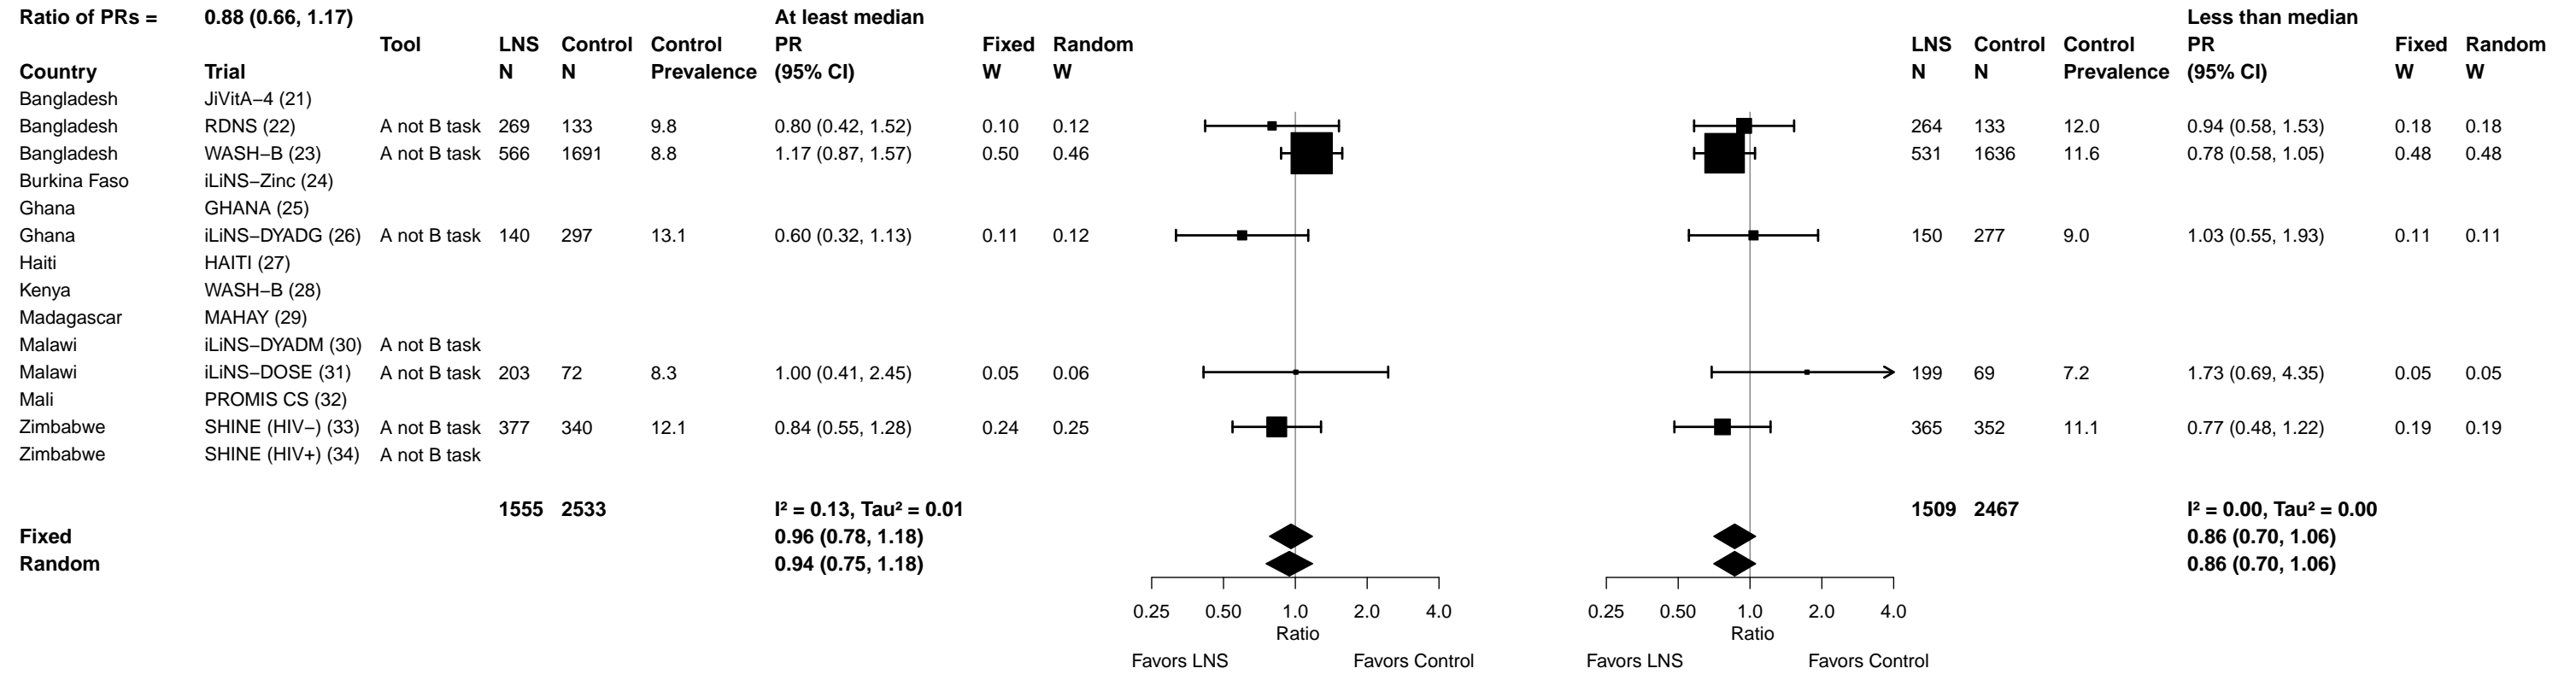

Supplemental figure 6M: Executive function lowest decile prevalence ratio

6M2: Stratified by Household food insecurity

P-for-interaction = 0.640  
 Ratio of PRs = 1.08 (0.79, 1.47)

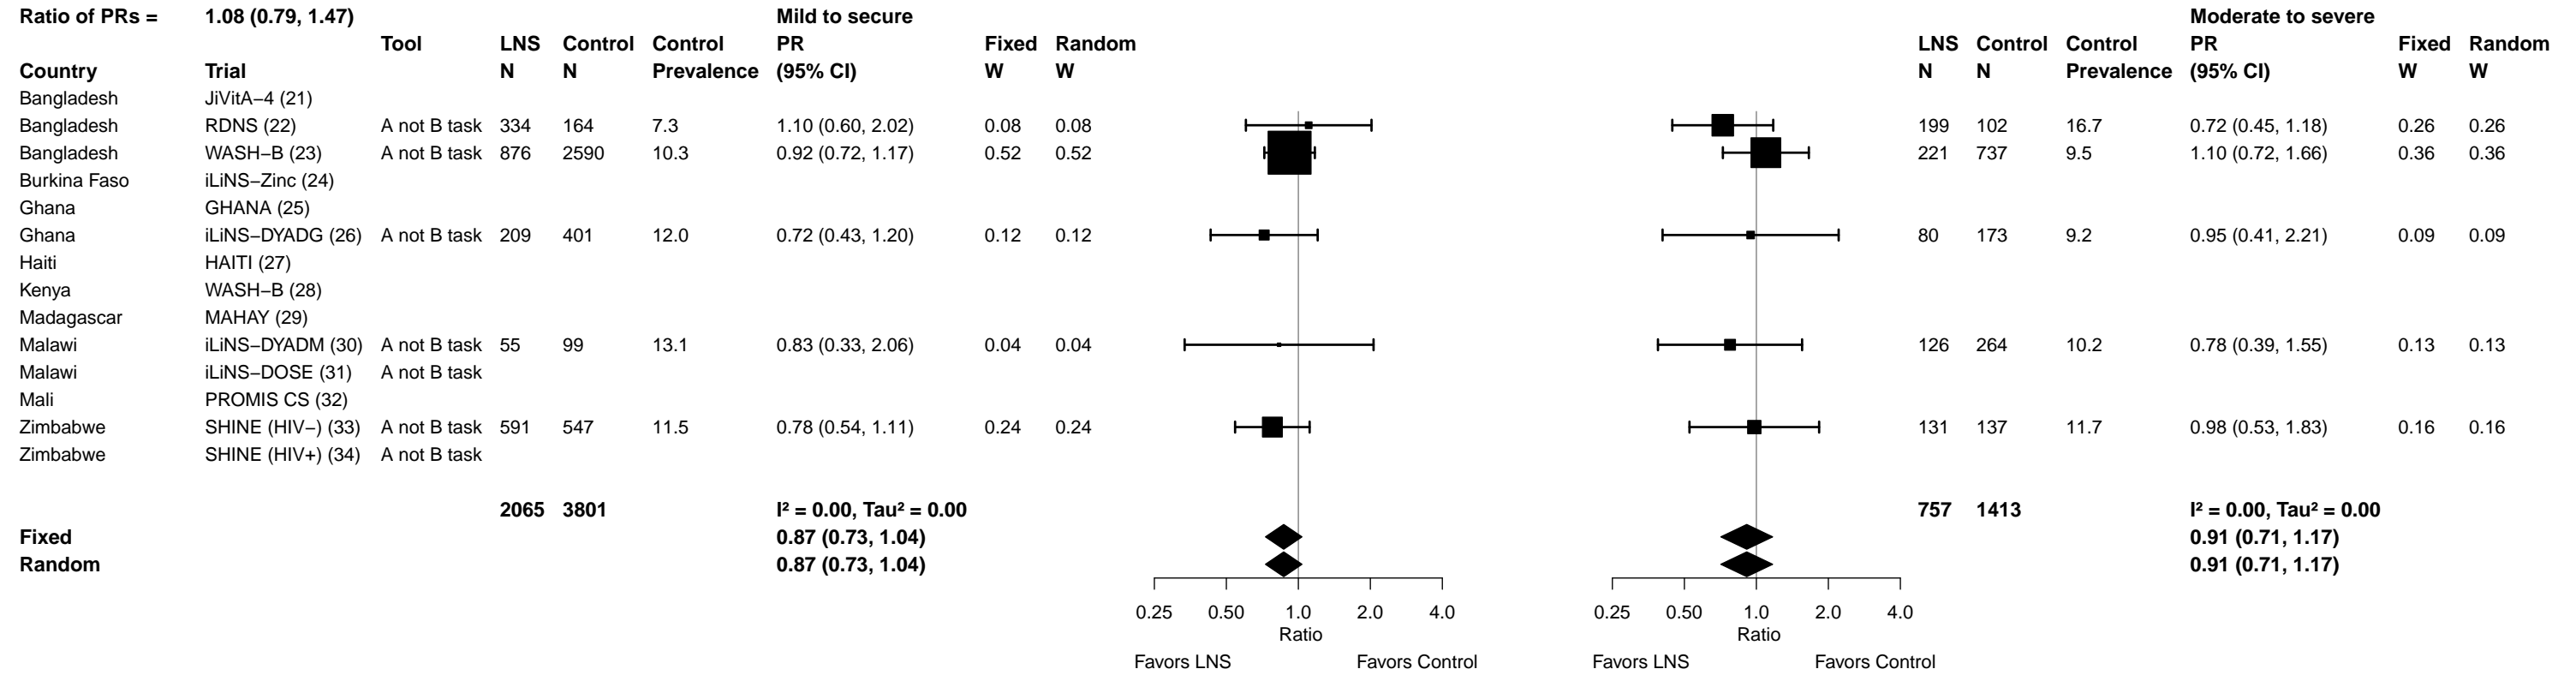

Supplemental figure 6M: Executive function lowest decile prevalence ratio

6M3: Stratified by Household source water quality (insufficient comparisons)

**Supplemental figure 6M: Executive function lowest decile prevalence ratio**

**6M4: Stratified by Household sanitation (insufficient comparisons)**



Supplemental figure 6M: Executive function lowest decile prevalence ratio

6M5: Stratified by Home environment

P-for-interaction = 0.287

Ratio of PRs = 1.18 (0.87, 1.59)

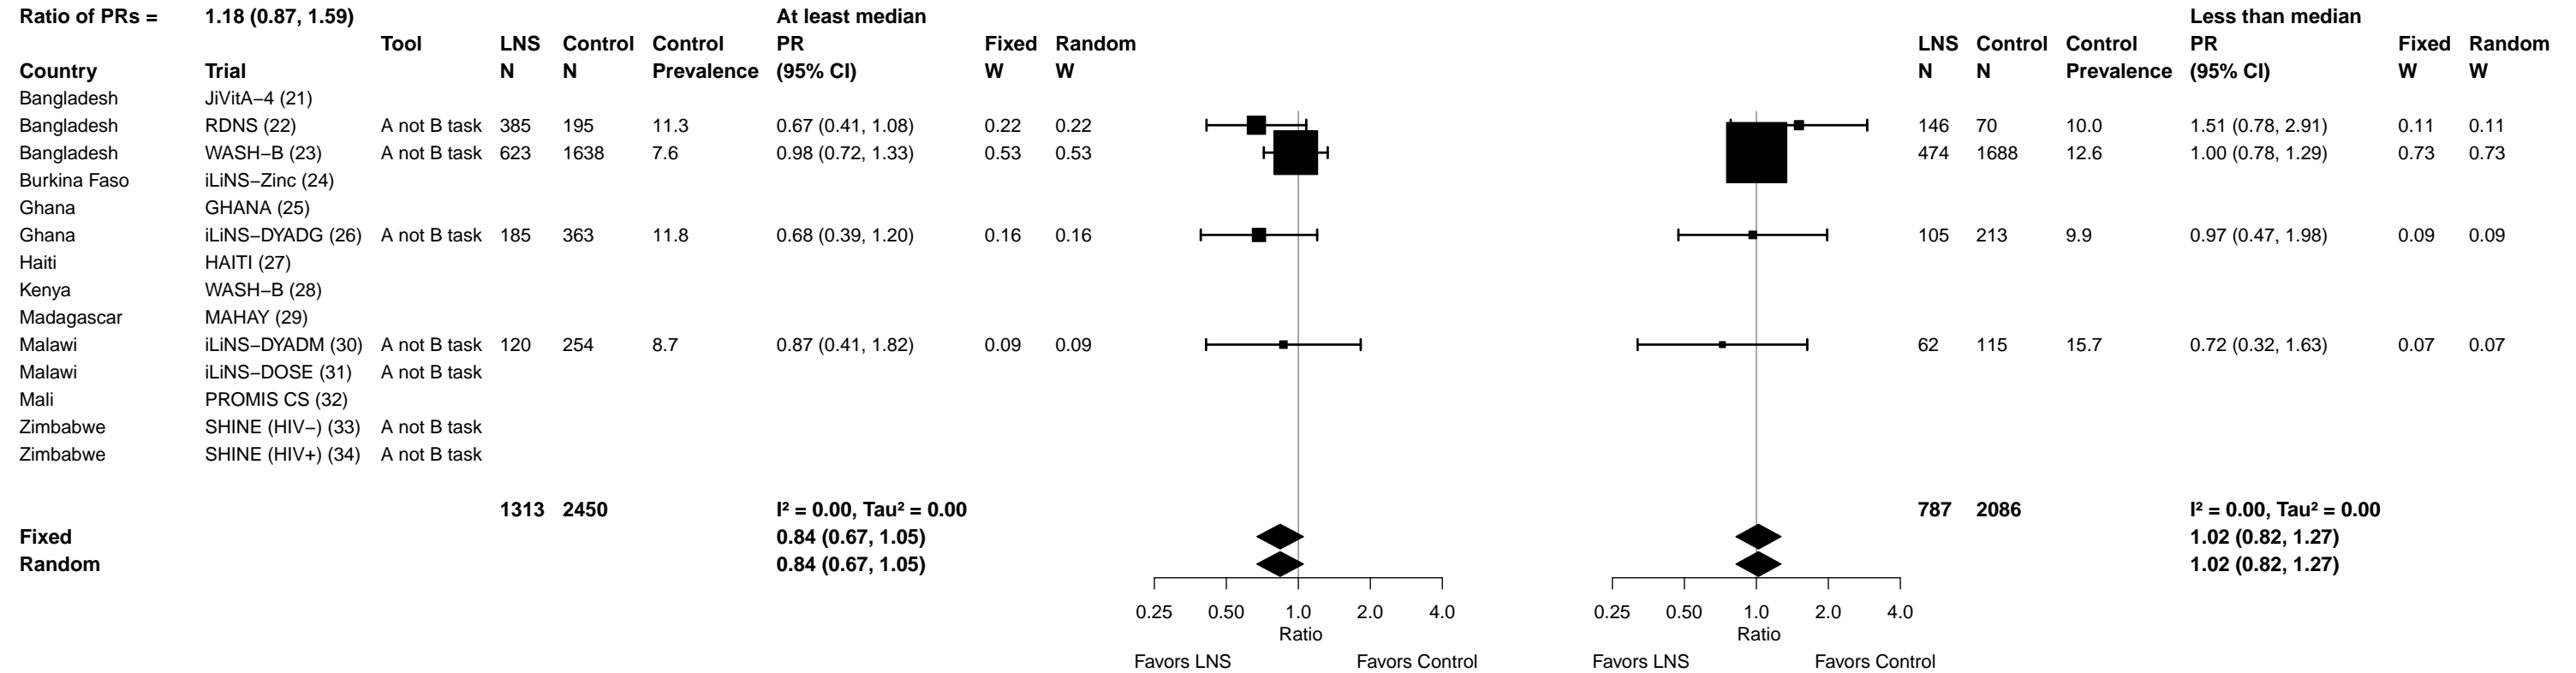

Supplemental figure 6M: Executive function lowest decile prevalence ratio

6M6: Stratified by Season at the time of assessment

P-for-interaction = 0.819

Ratio of PRs = 1.04 (0.75, 1.44)

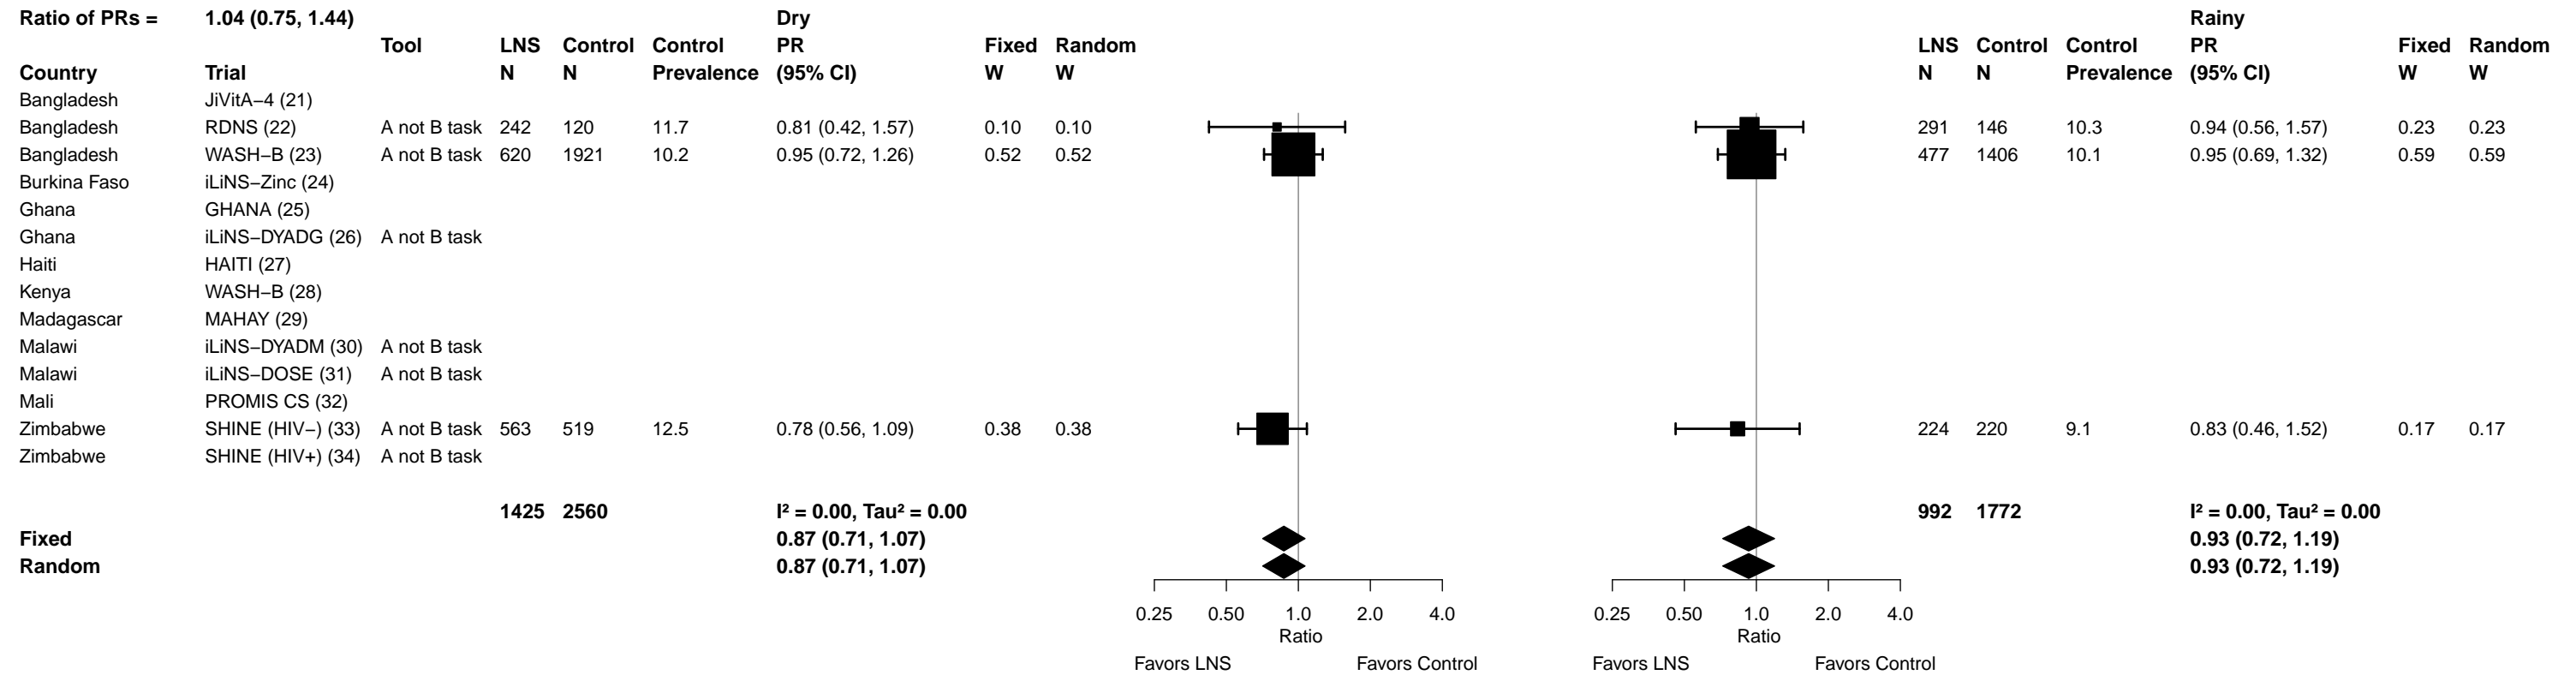

### Supplemental figure 6N: Executive function lowest decile prevalence difference

#### 6N1: Stratified by Household socio-economic status

**P-for-interaction = 0.517**  
**Difference in PDs = -0.01 (-0.04, 0.02)**

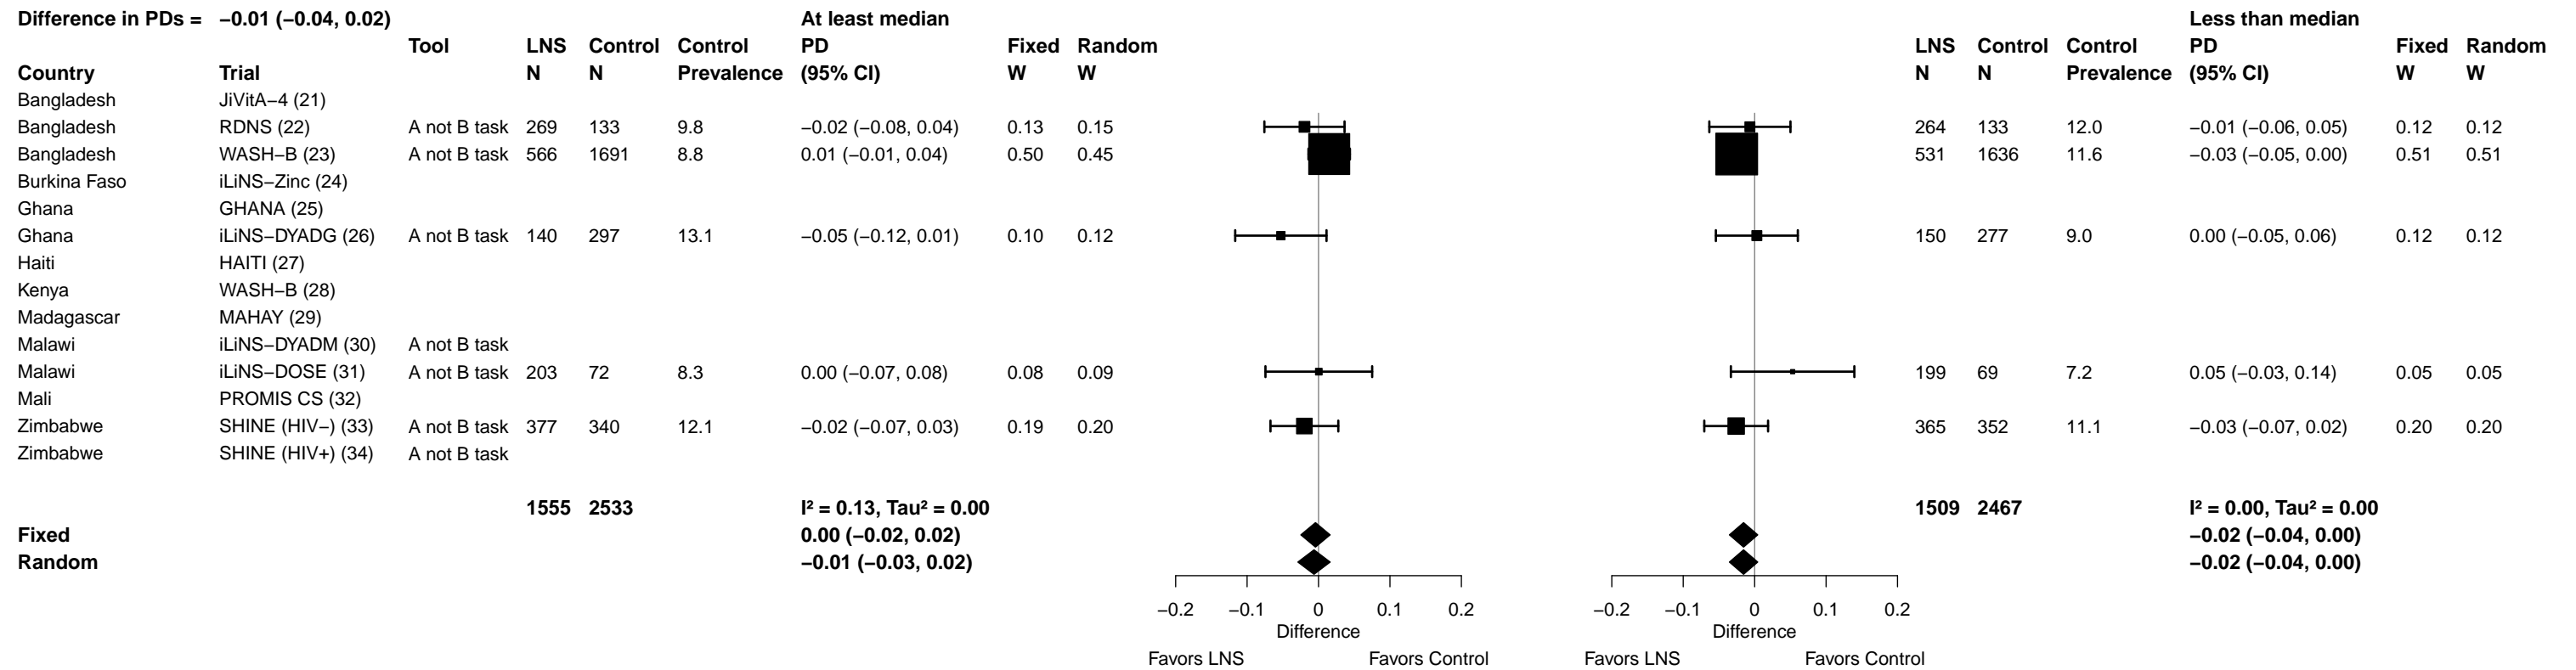

Supplemental figure 6N: Executive function lowest decile prevalence difference

6N2: Stratified by Household food insecurity

**P-for-interaction = 0.586**  
**Difference in PDs = 0.01 (-0.03, 0.04)**

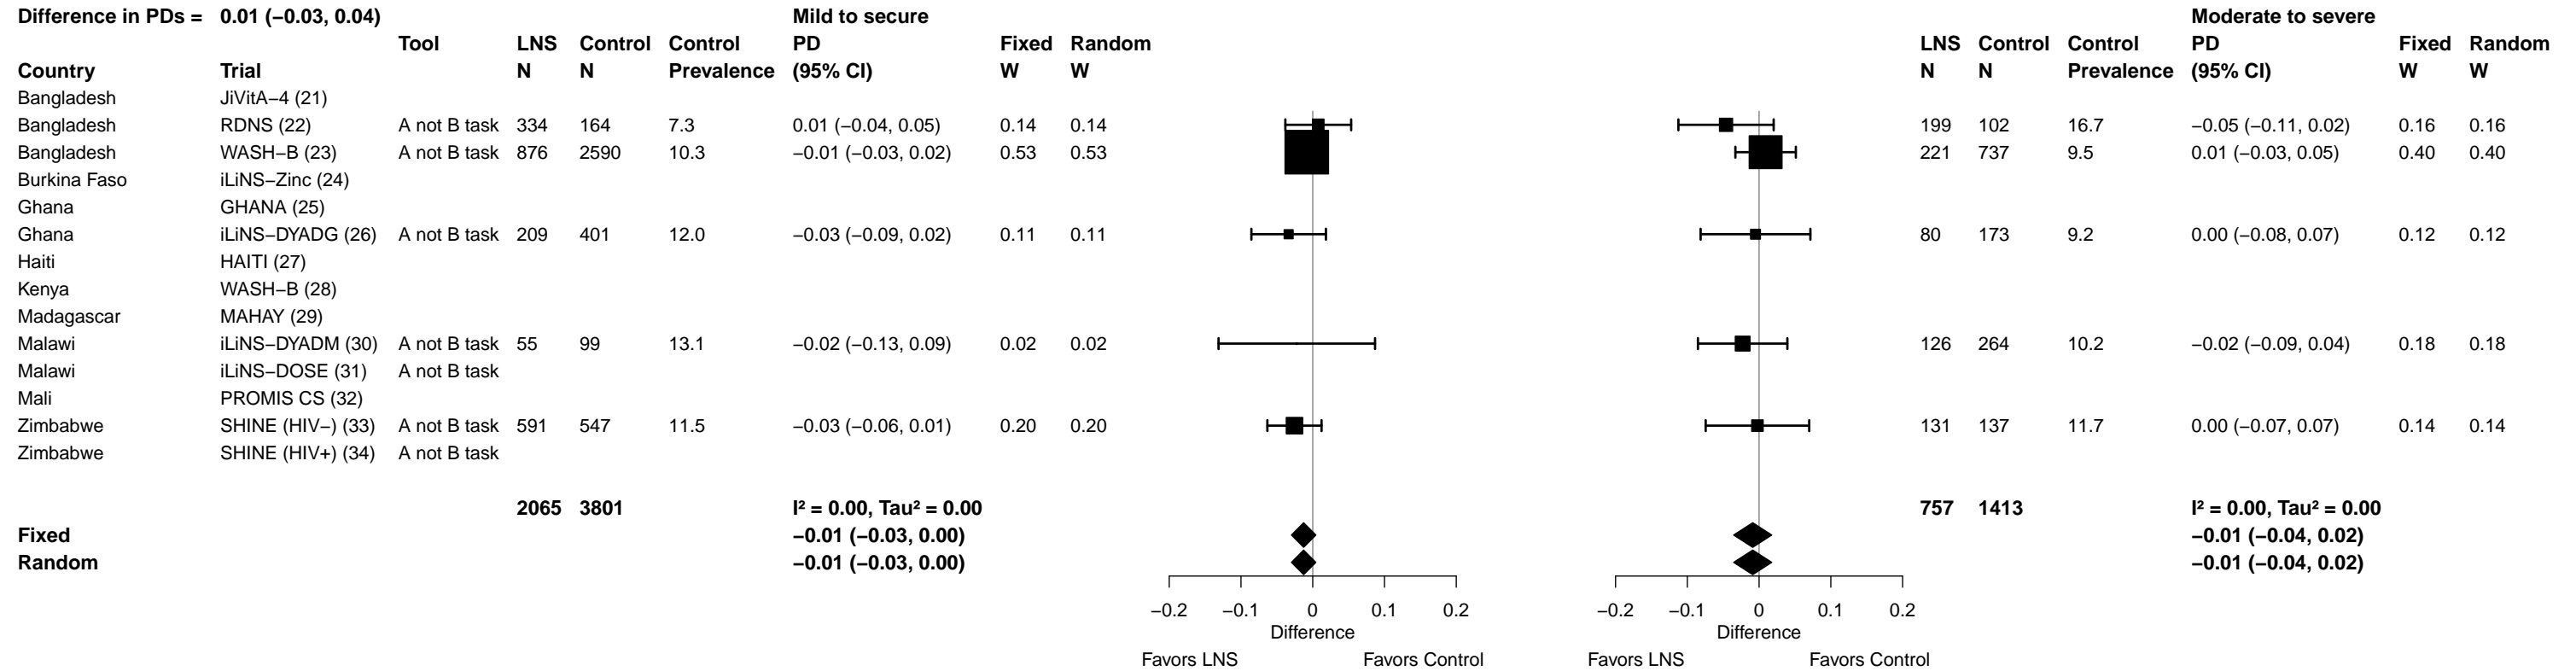

**Supplemental figure 6N: Executive function lowest decile prevalence difference**

**6N3: Stratified by Household source water quality (insufficient comparisons)**

**Supplemental figure 6N: Executive function lowest decile prevalence difference**

**6N4: Stratified by Household sanitation (insufficient comparisons)**

Supplemental figure 6N: Executive function lowest decile prevalence difference

6N5: Stratified by Home environment

**P-for-interaction = 0.441**  
**Difference in PDs = 0.01 (-0.02, 0.05)**

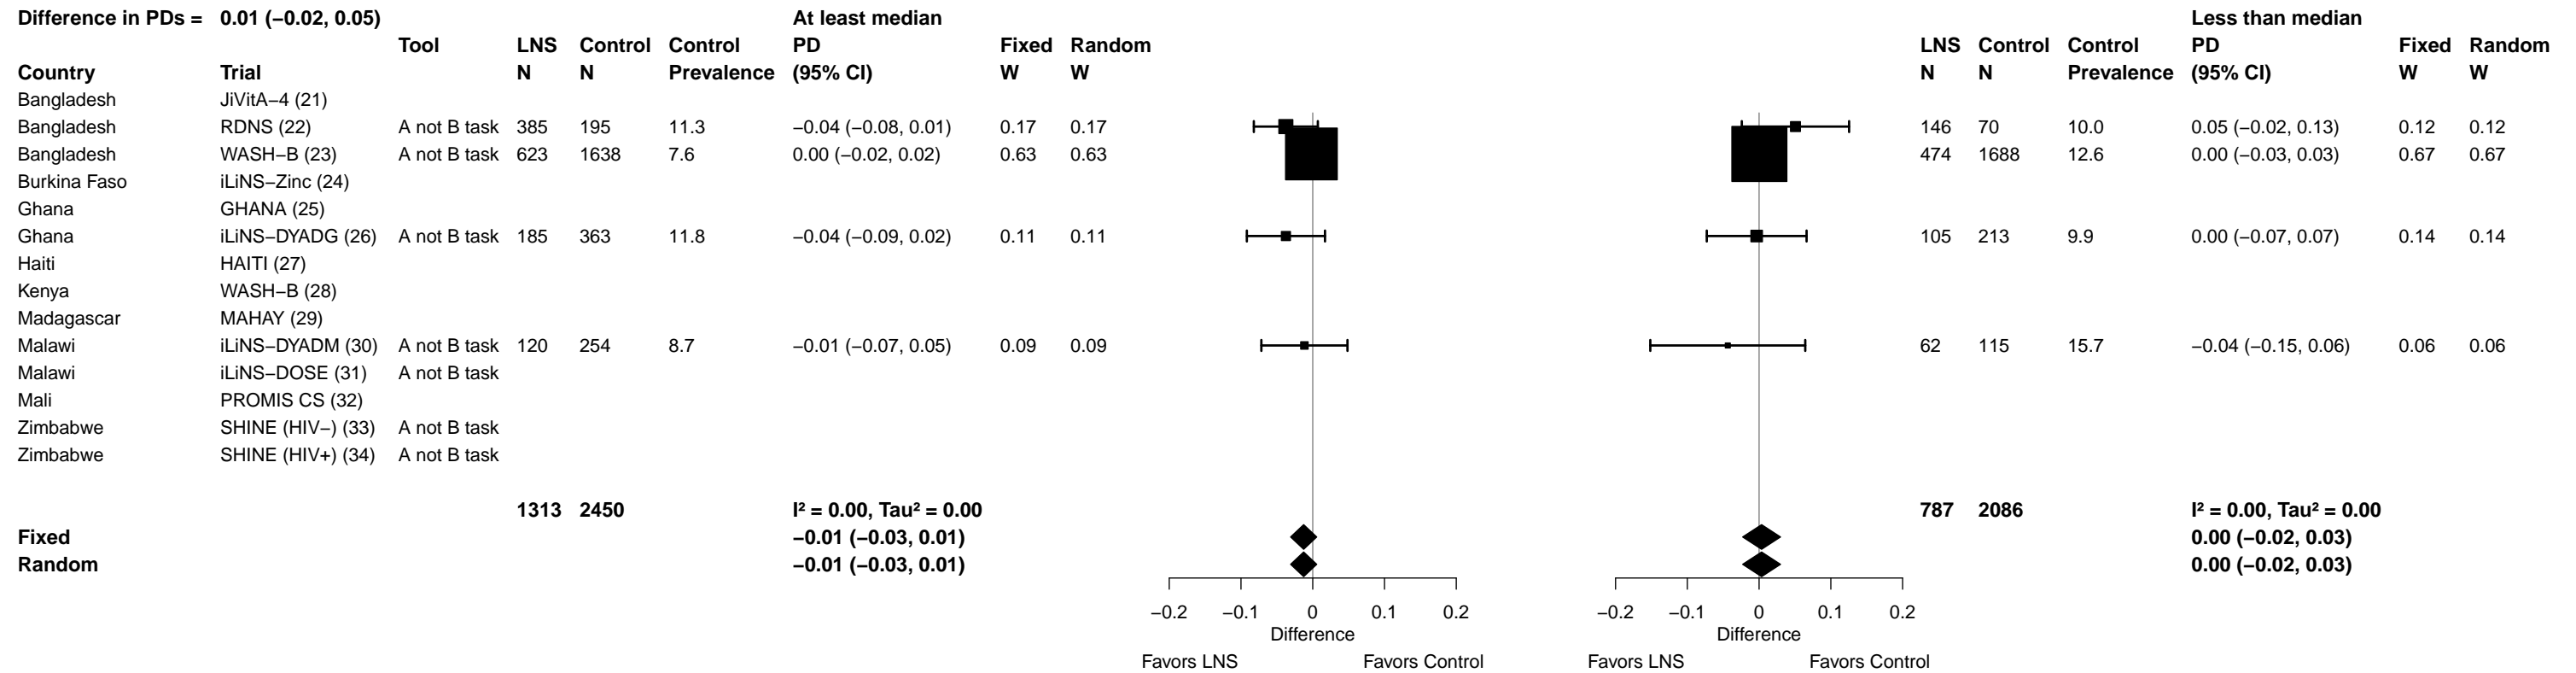

Supplemental figure 6N: Executive function lowest decile prevalence difference

6N6: Stratified by Season at the time of assessment

**P-for-interaction = 0.752**  
**Difference in PDs = 0.01 (-0.03, 0.04)**

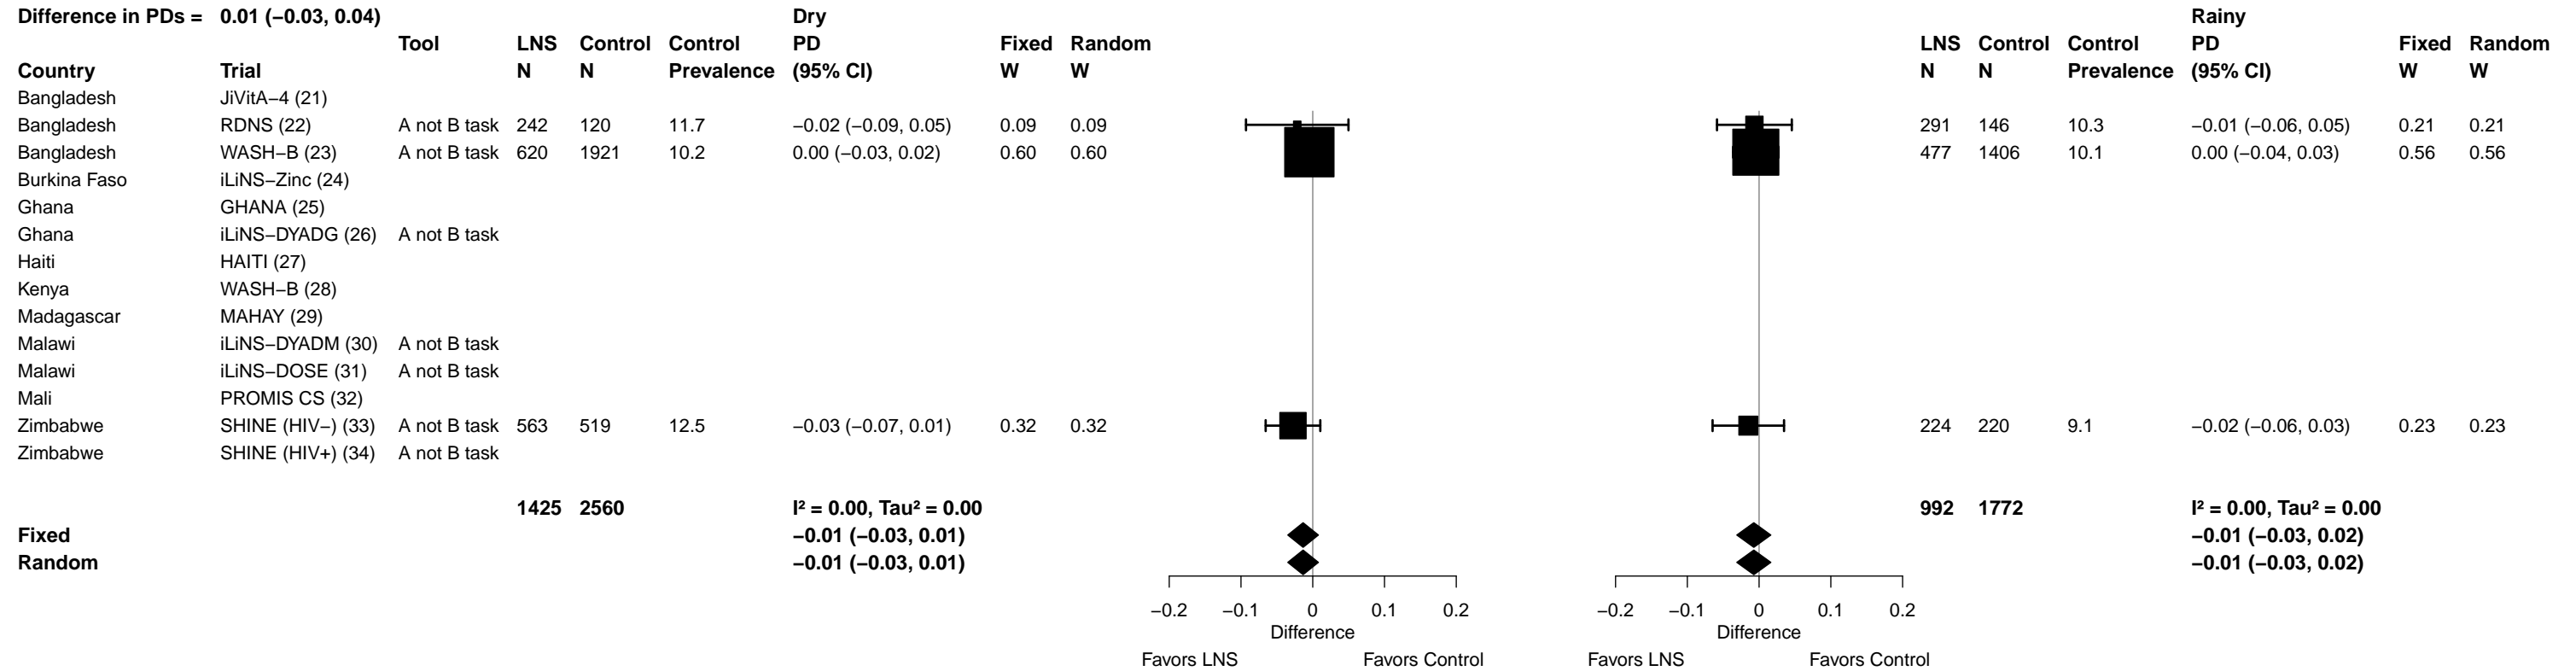



### Supplemental figure 6O: 12-mo walking without support prevalence ratio

#### 6O1: Stratified by Household socio-economic status

P-for-interaction = 0.721

Ratio of PRs = 1.01 (0.94, 1.10)

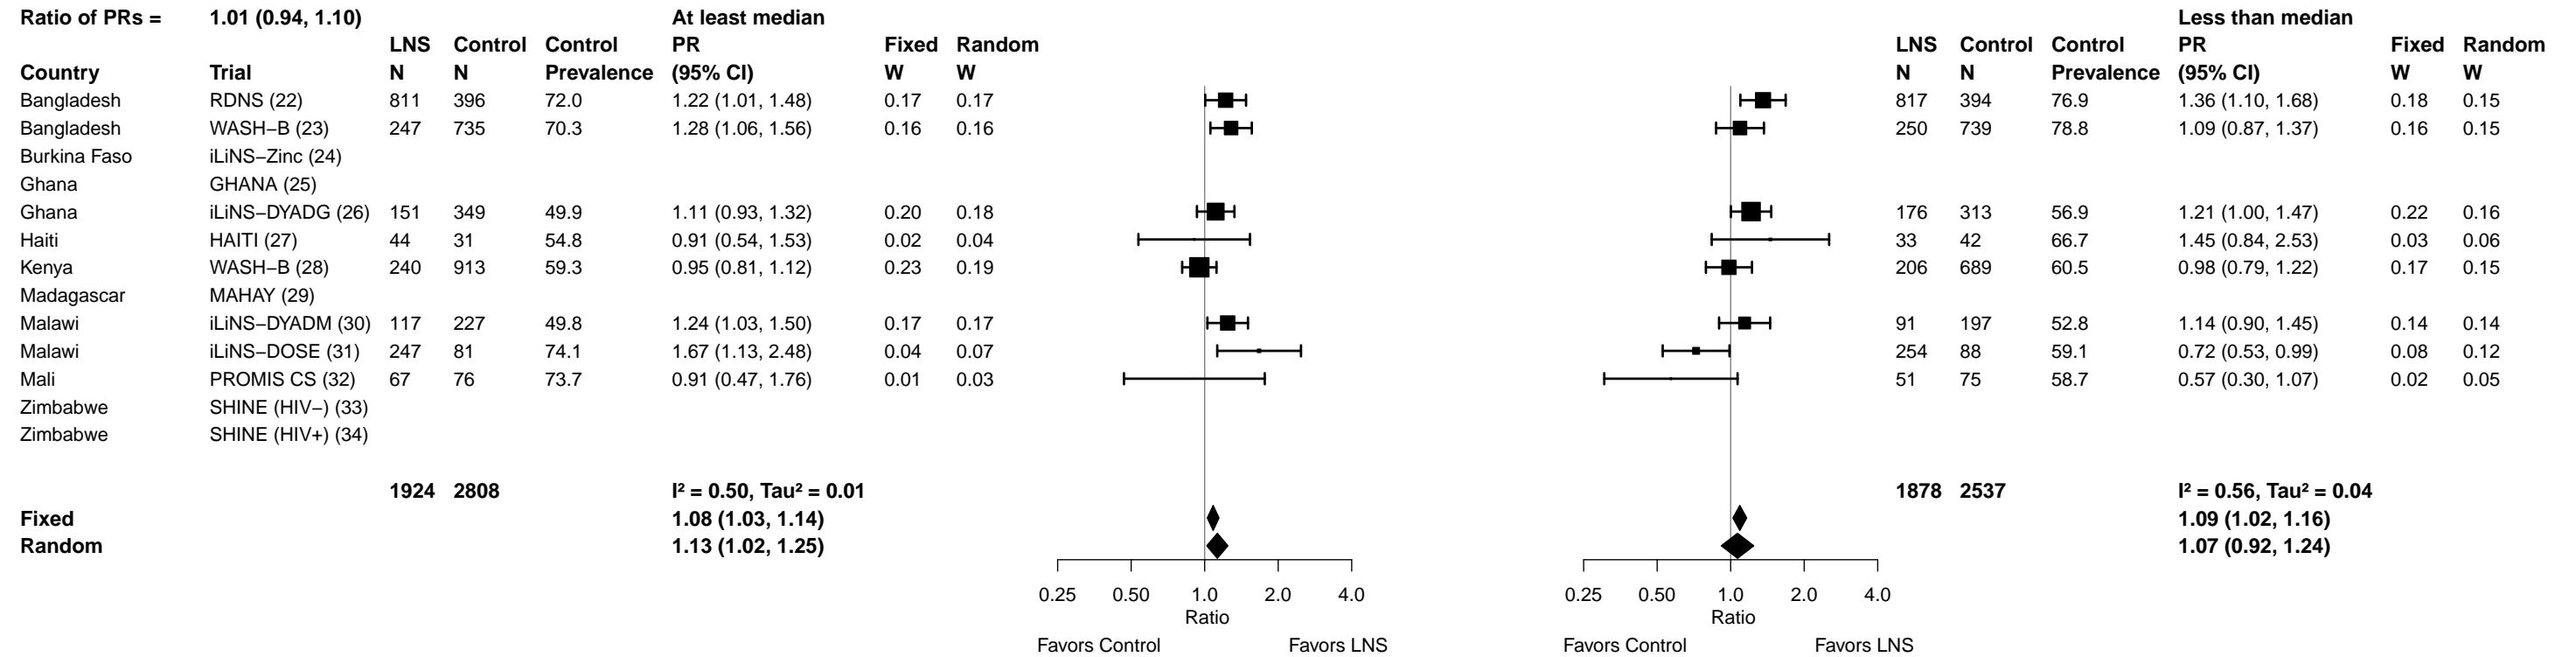

Supplemental figure 6O: 12-mo walking without support prevalence ratio

6O2: Stratified by Household food insecurity

**P-for-interaction = 0.812**  
**Ratio of PRs = 0.99 (0.90, 1.08)**

| Country      | Trial             | LNS<br>N | Control<br>N | Control<br>Prevalence | Mild to secure    | Fixed<br>W | Random<br>W |
|--------------|-------------------|----------|--------------|-----------------------|-------------------|------------|-------------|
|              |                   |          |              |                       | PR<br>(95% CI)    |            |             |
| Bangladesh   | RDNS (22)         | 1034     | 483          | 72.9                  | 1.19 (0.97, 1.48) | 0.13       | 0.15        |
| Bangladesh   | WASH-B (23)       | 398      | 1144         | 73.3                  | 1.27 (1.08, 1.48) | 0.23       | 0.23        |
| Burkina Faso | iLiNS-Zinc (24)   |          |              |                       |                   |            |             |
| Ghana        | GHANA (25)        |          |              |                       |                   |            |             |
| Ghana        | iLiNS-DYADG (26)  | 230      | 454          | 52.4                  | 1.16 (1.00, 1.35) | 0.25       | 0.24        |
| Haiti        | HAITI (27)        |          |              |                       |                   |            |             |
| Kenya        | WASH-B (28)       | 400      | 1448         | 59.0                  | 0.96 (0.84, 1.11) | 0.31       | 0.26        |
| Madagascar   | MAHAY (29)        |          |              |                       |                   |            |             |
| Malawi       | iLiNS-DYADM (30)  | 64       | 112          | 56.2                  | 1.21 (0.89, 1.66) | 0.06       | 0.08        |
| Malawi       | iLiNS-DOSE (31)   | 120      | 48           | 70.8                  | 1.43 (0.88, 2.33) | 0.02       | 0.04        |
| Mali         | PROMIS CS (32)    |          |              |                       |                   |            |             |
| Zimbabwe     | SHINE (HIV-) (33) |          |              |                       |                   |            |             |
| Zimbabwe     | SHINE (HIV+) (34) |          |              |                       |                   |            |             |

**Fixed**  
**Random**

**2246 3689**

**I<sup>2</sup> = 0.45, Tau<sup>2</sup> = 0.00**  
**1.09 (1.03, 1.14)**  
**1.12 (1.03, 1.21)**

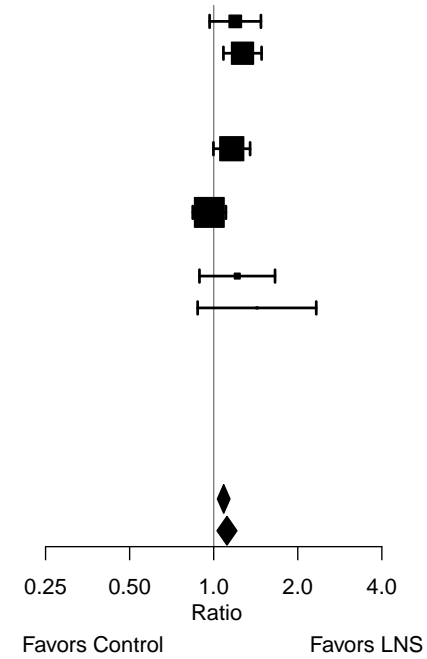

| LNS<br>N | Control<br>N | Control<br>Prevalence | Moderate to severe | Fixed<br>W | Random<br>W |
|----------|--------------|-----------------------|--------------------|------------|-------------|
|          |              |                       | PR<br>(95% CI)     |            |             |
| 594      | 307          | 76.9                  | 1.44 (1.16, 1.80)  | 0.21       | 0.21        |
| 99       | 330          | 79.1                  | 0.82 (0.56, 1.20)  | 0.07       | 0.11        |
| 96       | 206          | 54.9                  | 1.11 (0.86, 1.42)  | 0.17       | 0.18        |
| 46       | 153          | 66.7                  | 0.98 (0.60, 1.59)  | 0.04       | 0.07        |
| 142      | 307          | 48.5                  | 1.19 (1.00, 1.41)  | 0.36       | 0.26        |
| 371      | 118          | 61.9                  | 0.94 (0.72, 1.23)  | 0.15       | 0.17        |

**1348 1421**

**I<sup>2</sup> = 0.46, Tau<sup>2</sup> = 0.01**  
**1.10 (1.02, 1.18)**  
**1.10 (0.97, 1.24)**

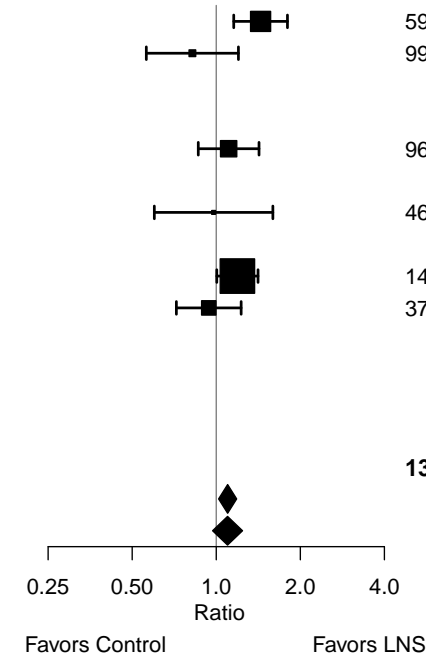

Supplemental figure 6O: 12-mo walking without support prevalence ratio

6O3: Stratified by Household source water quality

P-for-interaction = 0.190  
 Ratio of PRs = 1.17 (0.92, 1.48)

| Country       | Trial             | LNS N       | Control N   | Control Prevalence | Improved PR (95% CI)                                | Fixed W | Random W | LNS N      | Control N  | Control Prevalence | Unimproved PR (95% CI)                              | Fixed W | Random W |
|---------------|-------------------|-------------|-------------|--------------------|-----------------------------------------------------|---------|----------|------------|------------|--------------------|-----------------------------------------------------|---------|----------|
| Bangladesh    | RDNS (22)         |             |             |                    |                                                     |         |          |            |            |                    |                                                     |         |          |
| Bangladesh    | WASH-B (23)       | 201         | 428         | 74.5               | 1.17 (0.91, 1.51)                                   | 0.17    | 0.17     | 38         | 56         | 76.8               | 1.36 (0.75, 2.48)                                   | 0.12    | 0.18     |
| Burkina Faso  | iLiNS-Zinc (24)   |             |             |                    |                                                     |         |          |            |            |                    |                                                     |         |          |
| Ghana         | GHANA (25)        |             |             |                    |                                                     |         |          |            |            |                    |                                                     |         |          |
| Ghana         | iLiNS-DYADG (26)  |             |             |                    |                                                     |         |          |            |            |                    |                                                     |         |          |
| Haiti         | HAITI (27)        |             |             |                    |                                                     |         |          |            |            |                    |                                                     |         |          |
| Kenya         | WASH-B (28)       | 118         | 469         | 58.2               | 0.89 (0.68, 1.16)                                   | 0.16    | 0.16     | 84         | 234        | 60.3               | 1.17 (0.89, 1.53)                                   | 0.57    | 0.34     |
| Madagascar    | MAHAY (29)        |             |             |                    |                                                     |         |          |            |            |                    |                                                     |         |          |
| Malawi        | iLiNS-DYADM (30)  | 190         | 395         | 50.9               | 1.17 (1.00, 1.37)                                   | 0.44    | 0.44     | 18         | 28         | 53.6               | 1.56 (0.95, 2.54)                                   | 0.17    | 0.22     |
| Malawi        | iLiNS-DOSE (31)   | 470         | 157         | 66.2               | 1.09 (0.85, 1.40)                                   | 0.18    | 0.18     | 42         | 15         | 60.0               | 0.95 (0.46, 1.98)                                   | 0.08    | 0.14     |
| Mali          | PROMIS CS (32)    | 65          | 86          | 68.6               | 0.88 (0.56, 1.40)                                   | 0.05    | 0.05     | 48         | 63         | 61.9               | 0.49 (0.22, 1.12)                                   | 0.06    | 0.12     |
| Zimbabwe      | SHINE (HIV-) (33) |             |             |                    |                                                     |         |          |            |            |                    |                                                     |         |          |
| Zimbabwe      | SHINE (HIV+) (34) |             |             |                    |                                                     |         |          |            |            |                    |                                                     |         |          |
|               |                   | <b>1044</b> | <b>1535</b> |                    |                                                     |         |          | <b>230</b> | <b>396</b> |                    |                                                     |         |          |
| <b>Fixed</b>  |                   |             |             |                    | <b>I<sup>2</sup> = 0.01, Tau<sup>2</sup> = 0.00</b> |         |          |            |            |                    | <b>I<sup>2</sup> = 0.34, Tau<sup>2</sup> = 0.07</b> |         |          |
| <b>Random</b> |                   |             |             |                    | <b>1.09 (0.98, 1.21)</b>                            |         |          |            |            |                    | <b>1.17 (0.95, 1.43)</b>                            |         |          |
|               |                   |             |             |                    | <b>1.09 (0.98, 1.21)</b>                            |         |          |            |            |                    | <b>1.12 (0.80, 1.57)</b>                            |         |          |

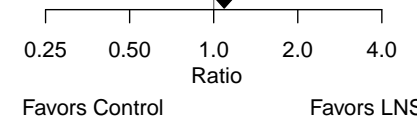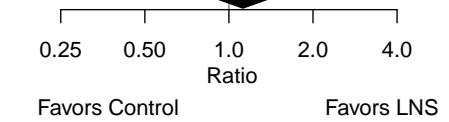

Supplemental figure 6O: 12-mo walking without support prevalence ratio

6O4: Stratified by Household sanitation

P-for-interaction = 0.336  
 Ratio of PRs = 0.94 (0.84, 1.06)

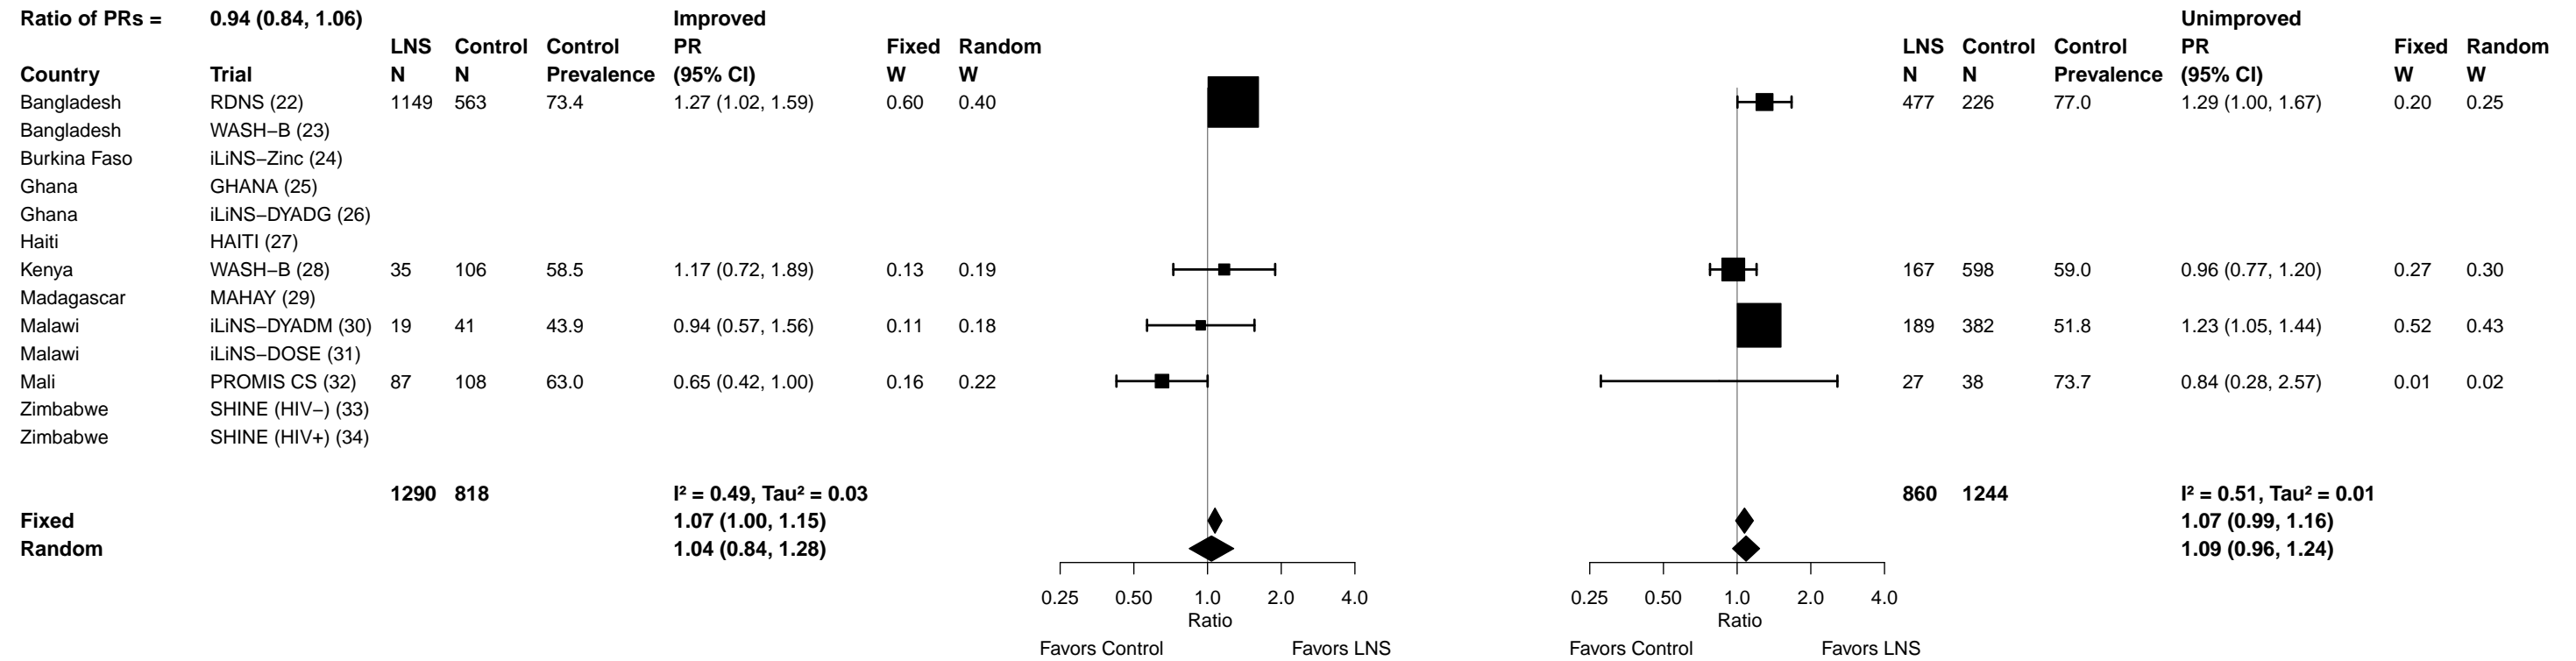

Supplemental figure 6O: 12-mo walking without support prevalence ratio

6O5: Stratified by Home environment

P-for-interaction = 0.458  
 Ratio of PRs = 0.95 (0.84, 1.08)

| Country      | Trial             | LNS N | Control N | Control Prevalence | PR (95% CI)       | Fixed W | Random W | At least median |           |                    |             | Less than median |          |       |           |                    |             |         |          |  |
|--------------|-------------------|-------|-----------|--------------------|-------------------|---------|----------|-----------------|-----------|--------------------|-------------|------------------|----------|-------|-----------|--------------------|-------------|---------|----------|--|
|              |                   |       |           |                    |                   |         |          | LNS N           | Control N | Control Prevalence | PR (95% CI) | Fixed W          | Random W | LNS N | Control N | Control Prevalence | PR (95% CI) | Fixed W | Random W |  |
| Bangladesh   | RDNS (22)         | 1158  | 560       | 74.5               | 1.34 (1.09, 1.64) | 0.13    | 0.15     |                 |           |                    |             |                  |          |       |           |                    |             |         |          |  |
| Bangladesh   | WASH-B (23)       | 243   | 689       | 73.9               | 1.32 (1.10, 1.58) | 0.17    | 0.18     |                 |           |                    |             |                  |          |       |           |                    |             |         |          |  |
| Burkina Faso | iLiNS-Zinc (24)   |       |           |                    |                   |         |          |                 |           |                    |             |                  |          |       |           |                    |             |         |          |  |
| Ghana        | GHANA (25)        |       |           |                    |                   |         |          |                 |           |                    |             |                  |          |       |           |                    |             |         |          |  |
| Ghana        | iLiNS-DYADG (26)  | 198   | 373       | 50.4               | 1.16 (0.99, 1.36) | 0.23    | 0.20     |                 |           |                    |             |                  |          |       |           |                    |             |         |          |  |
| Haiti        | HAITI (27)        |       |           |                    |                   |         |          |                 |           |                    |             |                  |          |       |           |                    |             |         |          |  |
| Kenya        | WASH-B (28)       | 248   | 834       | 55.6               | 0.93 (0.79, 1.09) | 0.23    | 0.20     |                 |           |                    |             |                  |          |       |           |                    |             |         |          |  |
| Madagascar   | MAHAY (29)        |       |           |                    |                   |         |          |                 |           |                    |             |                  |          |       |           |                    |             |         |          |  |
| Malawi       | iLiNS-DYADM (30)  | 130   | 278       | 49.3               | 1.17 (0.97, 1.40) | 0.17    | 0.17     |                 |           |                    |             |                  |          |       |           |                    |             |         |          |  |
| Malawi       | iLiNS-DOSE (31)   | 306   | 109       | 65.1               | 1.15 (0.86, 1.54) | 0.07    | 0.10     |                 |           |                    |             |                  |          |       |           |                    |             |         |          |  |
| Mali         | PROMIS CS (32)    |       |           |                    |                   |         |          |                 |           |                    |             |                  |          |       |           |                    |             |         |          |  |
| Zimbabwe     | SHINE (HIV-) (33) |       |           |                    |                   |         |          |                 |           |                    |             |                  |          |       |           |                    |             |         |          |  |
| Zimbabwe     | SHINE (HIV+) (34) |       |           |                    |                   |         |          |                 |           |                    |             |                  |          |       |           |                    |             |         |          |  |

Fixed  
 Random  
 I<sup>2</sup> = 0.56, Tau<sup>2</sup> = 0.01  
 1.15 (1.07, 1.24)  
 1.16 (1.04, 1.30)

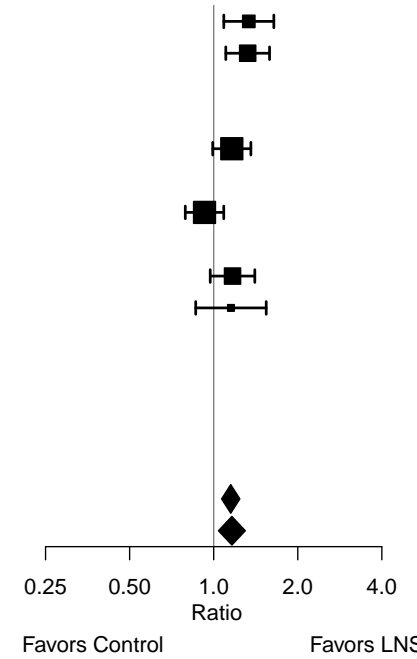

Fixed  
 Random  
 I<sup>2</sup> = 0.00, Tau<sup>2</sup> = 0.00  
 1.11 (1.00, 1.23)  
 1.11 (1.00, 1.23)

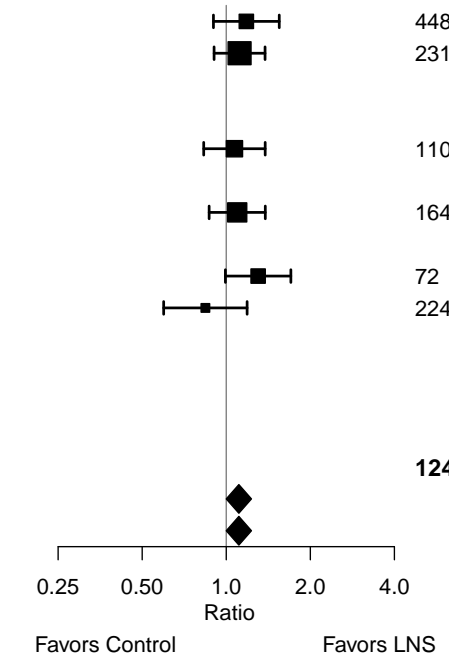

Supplemental figure 6O: 12-mo walking without support prevalence ratio

6O6: Stratified by Season at the time of assessment

P-for-interaction = 0.845  
 Ratio of PRs = 0.99 (0.88, 1.11)

| Country      | Trial             | LNS<br>N | Control<br>N | Control<br>Prevalence | Dry               |            | LNS<br>N | Control<br>N | Control<br>Prevalence | Rainy       |                   |            |             |
|--------------|-------------------|----------|--------------|-----------------------|-------------------|------------|----------|--------------|-----------------------|-------------|-------------------|------------|-------------|
|              |                   |          |              |                       | PR<br>(95% CI)    | Fixed<br>W |          |              |                       | Random<br>W | PR<br>(95% CI)    | Fixed<br>W | Random<br>W |
| Bangladesh   | RDNS (22)         | 899      | 430          | 77.4                  | 1.28 (1.04, 1.59) | 0.15       | 0.16     | 729          | 360                   | 70.8        | 1.28 (1.03, 1.60) | 0.14       | 0.14        |
| Bangladesh   | WASH-B (23)       | 267      | 774          | 72.6                  | 1.19 (0.99, 1.43) | 0.19       | 0.18     | 230          | 700                   | 76.7        | 1.21 (0.99, 1.49) | 0.17       | 0.17        |
| Burkina Faso | iLiNS-Zinc (24)   |          |              |                       |                   |            |          |              |                       |             |                   |            |             |
| Ghana        | GHANA (25)        | 53       | 51           | 78.4                  | 2.01 (1.10, 3.69) | 0.02       | 0.03     | 37           | 36                    | 69.4        | 1.33 (0.71, 2.49) | 0.02       | 0.02        |
| Ghana        | iLiNS-DYADG (26)  | 163      | 320          | 48.4                  | 1.15 (0.98, 1.36) | 0.25       | 0.21     | 164          | 343                   | 57.4        | 1.13 (0.93, 1.38) | 0.17       | 0.17        |
| Haiti        | HAITI (27)        |          |              |                       |                   |            |          |              |                       |             |                   |            |             |
| Kenya        | WASH-B (28)       | 131      | 461          | 62.5                  | 0.92 (0.69, 1.22) | 0.08       | 0.11     | 316          | 1143                  | 58.6        | 0.99 (0.86, 1.13) | 0.36       | 0.36        |
| Madagascar   | MAHAY (29)        |          |              |                       |                   |            |          |              |                       |             |                   |            |             |
| Malawi       | iLiNS-DYADM (30)  | 150      | 311          | 53.7                  | 1.24 (1.03, 1.49) | 0.20       | 0.19     | 58           | 115                   | 44.3        | 1.12 (0.86, 1.45) | 0.10       | 0.10        |
| Malawi       | iLiNS-DOSE (31)   | 437      | 152          | 65.8                  | 1.04 (0.81, 1.34) | 0.10       | 0.13     | 165          | 48                    | 64.6        | 1.04 (0.68, 1.61) | 0.04       | 0.04        |
| Mali         | PROMIS CS (32)    |          |              |                       |                   |            |          |              |                       |             |                   |            |             |
| Zimbabwe     | SHINE (HIV-) (33) |          |              |                       |                   |            |          |              |                       |             |                   |            |             |
| Zimbabwe     | SHINE (HIV+) (34) |          |              |                       |                   |            |          |              |                       |             |                   |            |             |

Fixed  
 Random  
 I<sup>2</sup> = 0.23, Tau<sup>2</sup> = 0.01  
 1.17 (1.08, 1.27)  
 1.17 (1.05, 1.31)

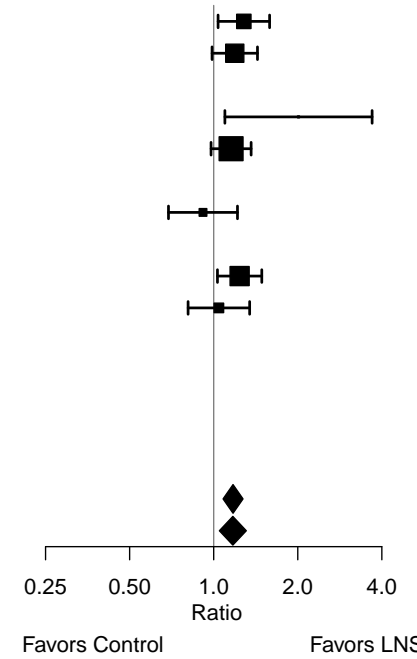

Fixed  
 Random  
 I<sup>2</sup> = 0.00, Tau<sup>2</sup> = 0.00  
 1.11 (1.02, 1.20)  
 1.11 (1.02, 1.20)

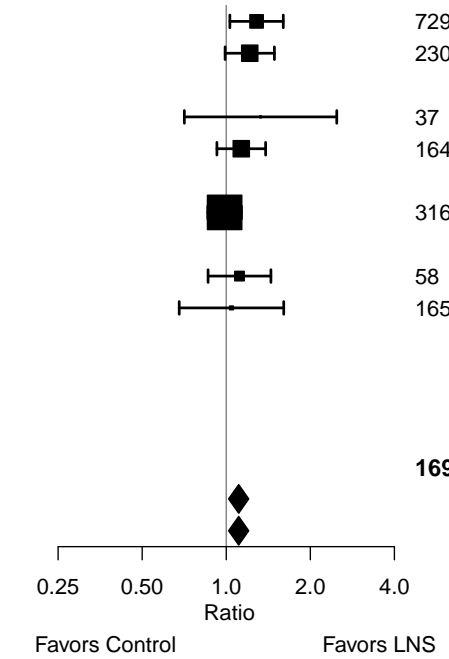

### Supplemental figure 6P: 12-mo walking without support prevalence difference

#### 6P1: Stratified by Household socio-economic status

P-for-interaction = 0.521

Difference in PDs = -0.01 (-0.05, 0.02)

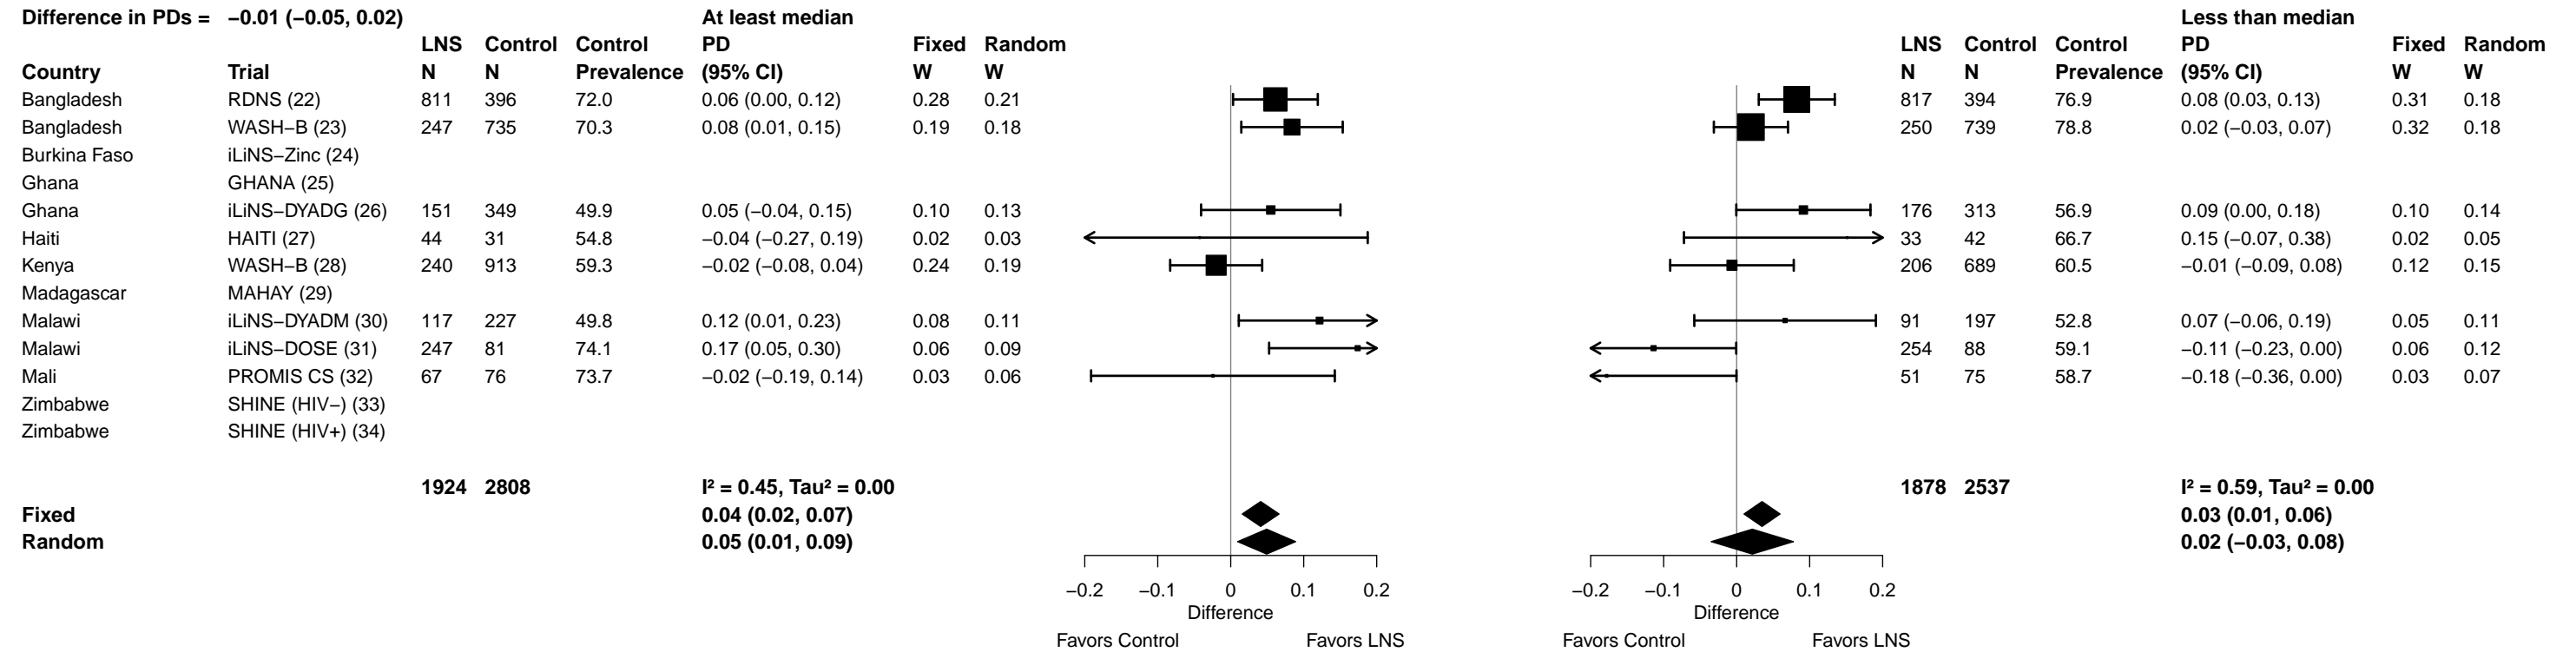

Supplemental figure 6P: 12-mo walking without support prevalence difference

6P2: Stratified by Household food insecurity

P-for-interaction = 0.547  
 Difference in PDs = -0.01 (-0.05, 0.03)

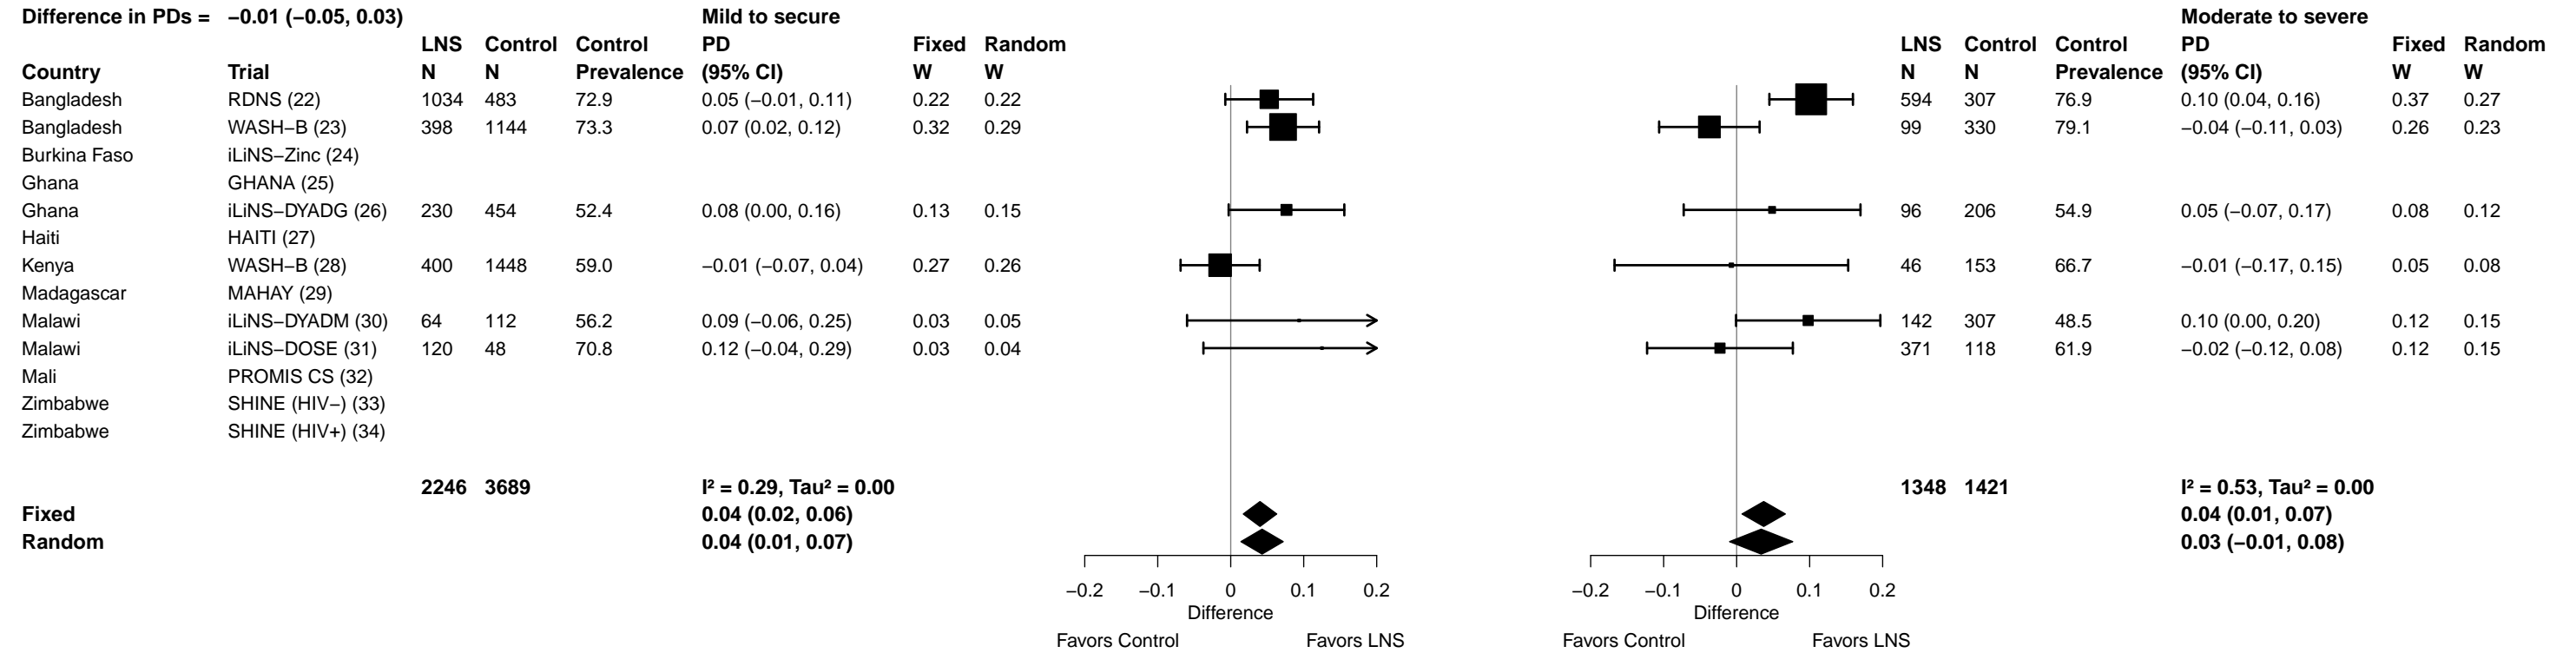



Supplemental figure 6P: 12-mo walking without support prevalence difference

6P3: Stratified by Household source water quality

**P-for-interaction = 0.476**  
**Difference in PDs = 0.03 (-0.06, 0.13)**

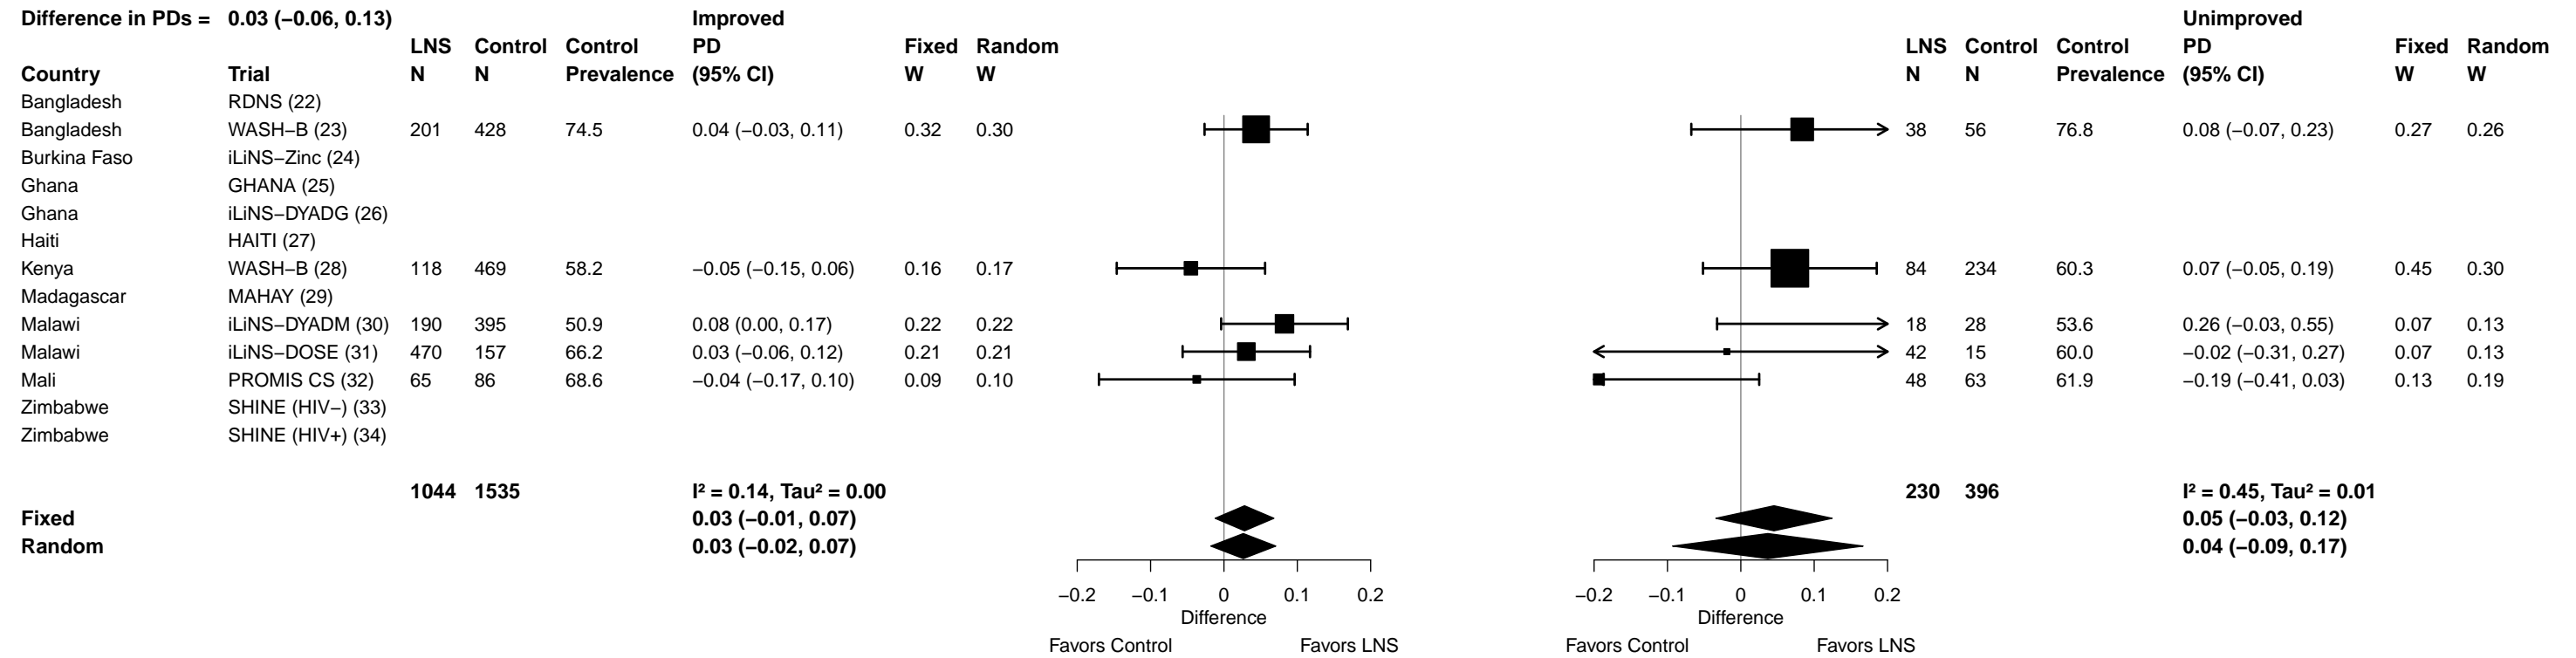

Supplemental figure 6P: 12-mo walking without support prevalence difference

6P4: Stratified by Household sanitation

P-for-interaction = 0.417  
 Difference in PDs = -0.02 (-0.07, 0.03)

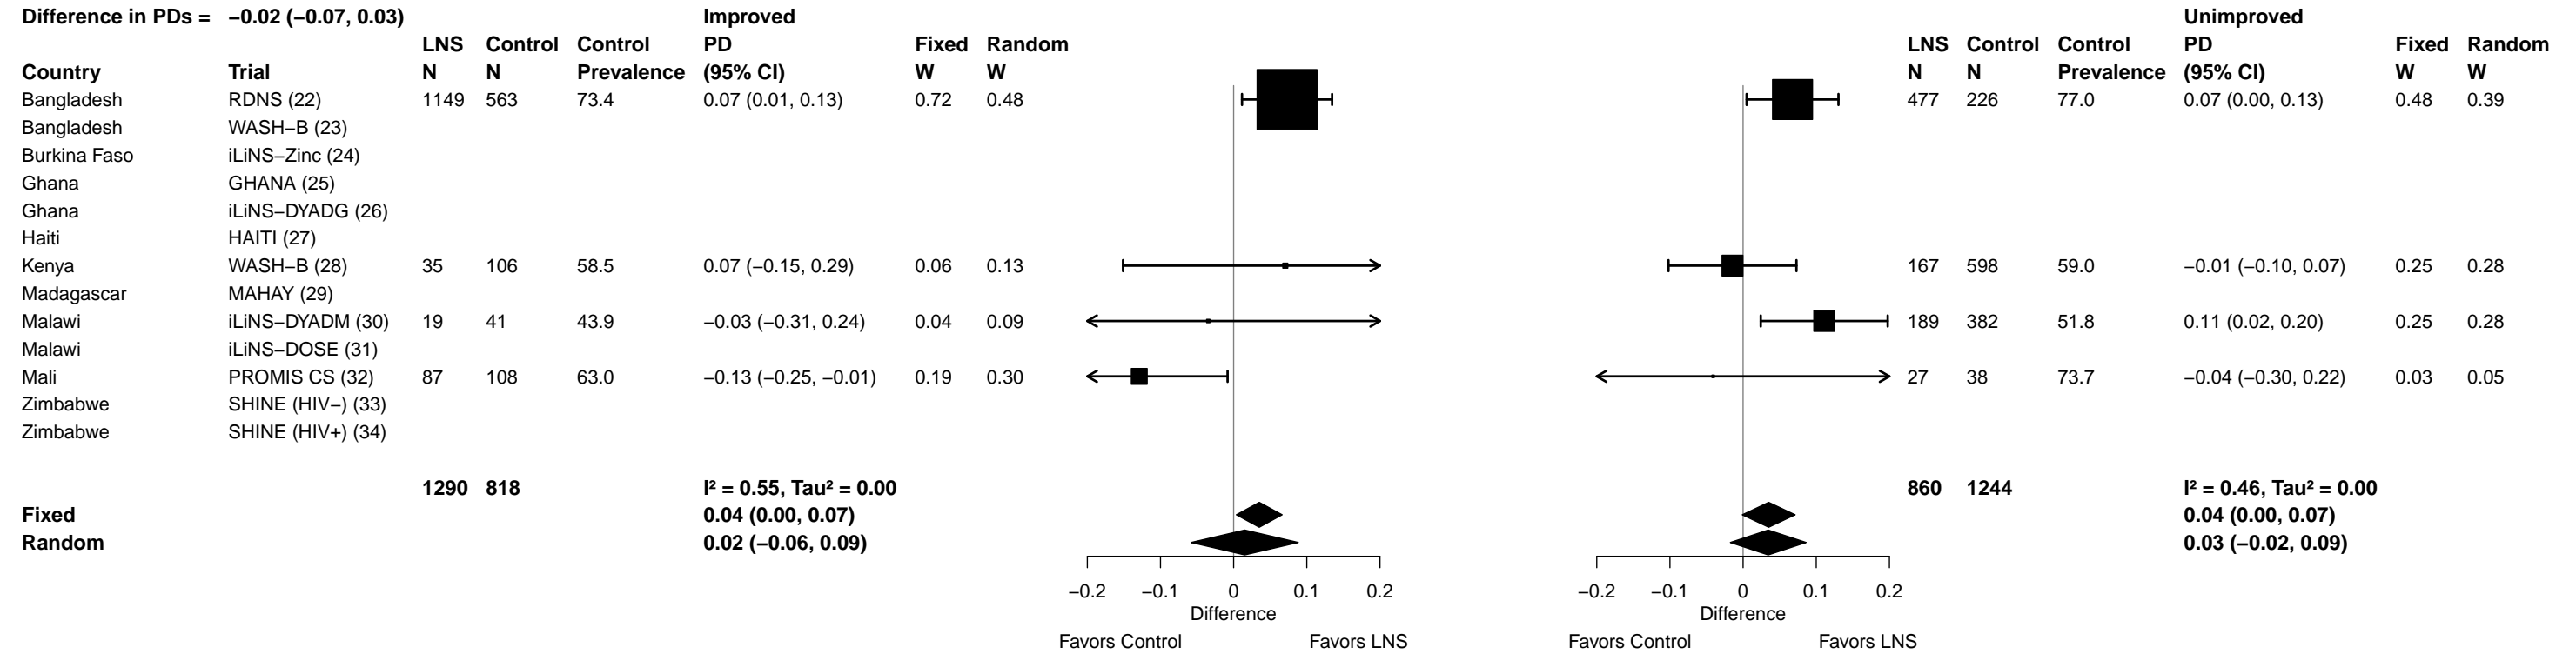

Supplemental figure 6P: 12-mo walking without support prevalence difference

6P5: Stratified by Home environment

P-for-interaction = 0.302  
 Difference in PDs = -0.02 (-0.07, 0.02)

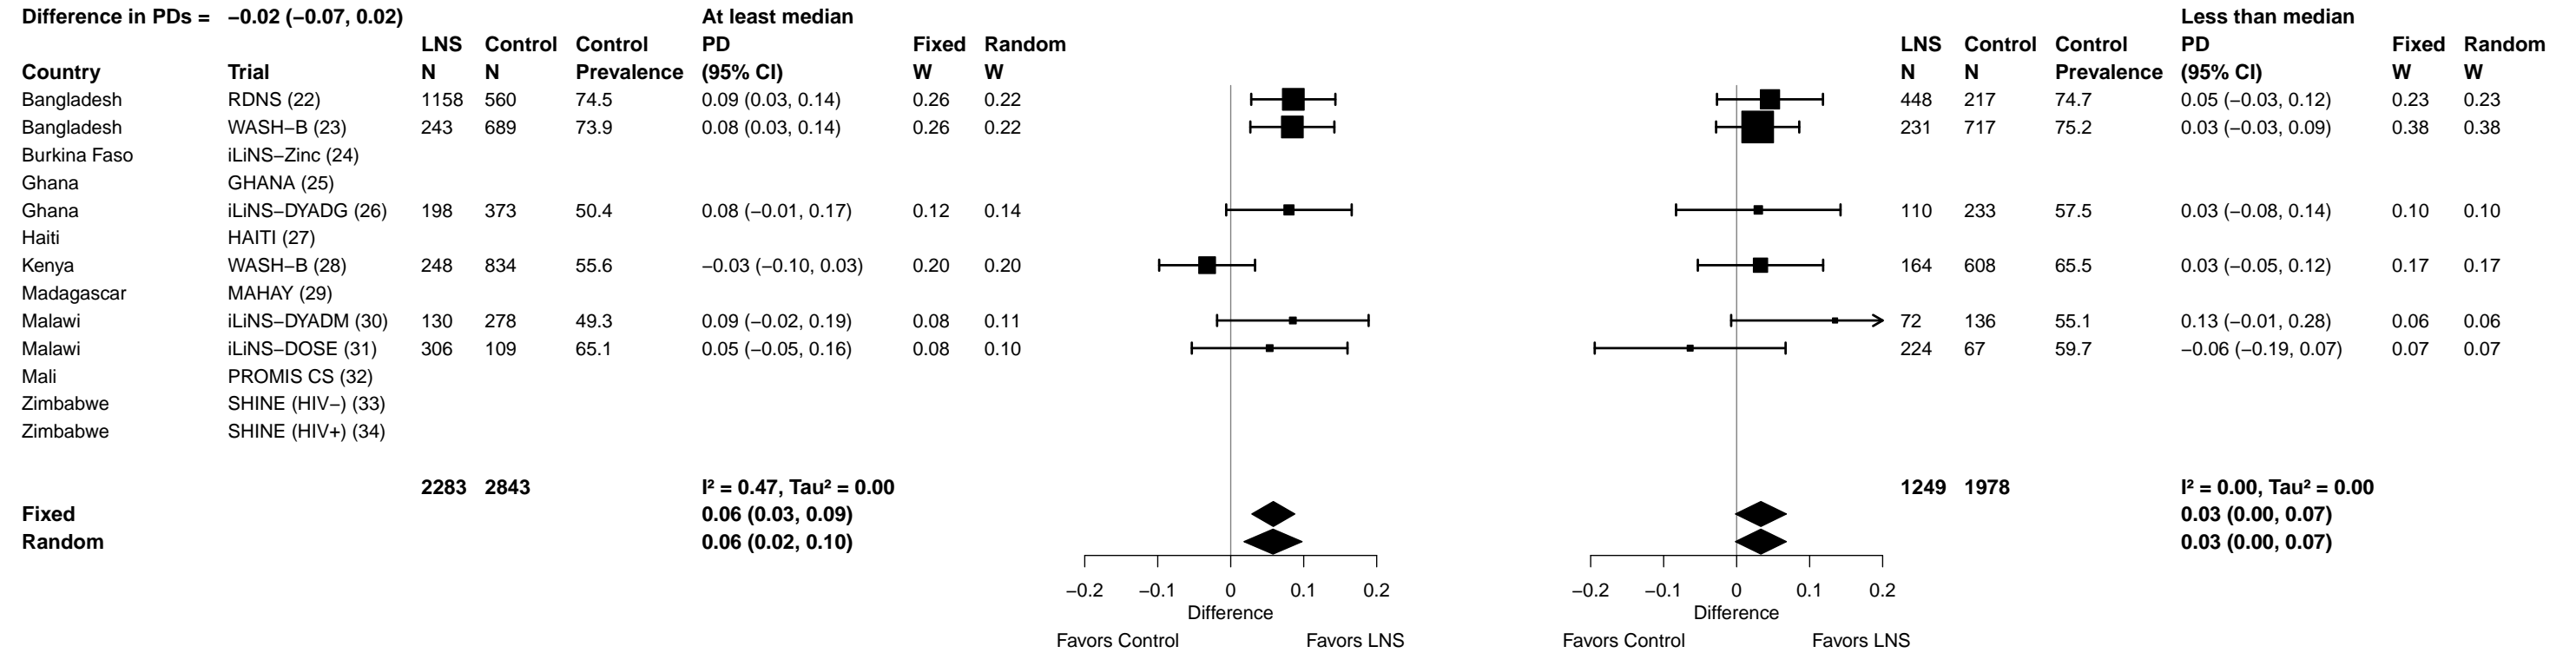

Supplemental figure 6P: 12-mo walking without support prevalence difference

6P6: Stratified by Season at the time of assessment

P-for-interaction = 0.935  
 Difference in PDs = 0.00 (-0.04, 0.05)

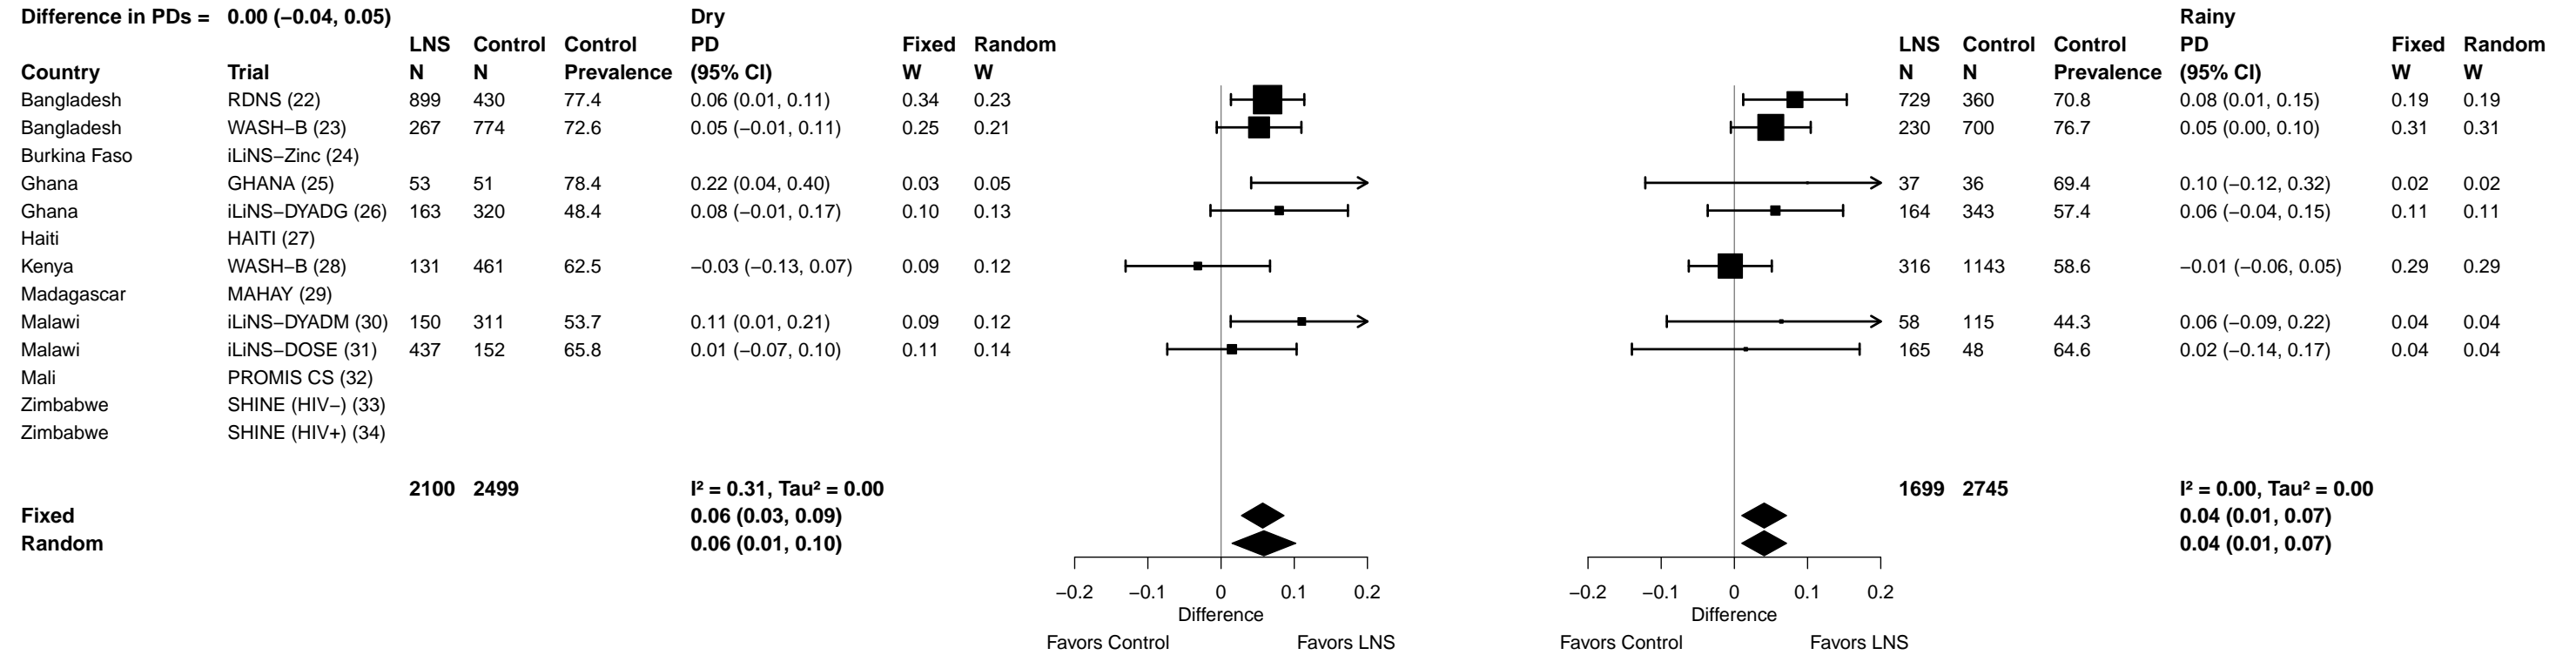

Supplement: Supplementary file [file media-2.pdf]
